# Supplementary material for: A computational study of the reaction mechanism and stereospecificity of dihydropyrimidinase
Source: Royal Society of Chemistry journal article supplement (doi:10.1039/d2cp05262h), 2023-01-01
Supplement: d2cp05262h1.pdf [file d2cp05262h1.pdf]

## Electronic Supplementary Information

### Computational Study of the Reaction Mechanism and Stereospecificity of Dihydropyrimidinase

Wijitra Meelua,<sup>ab</sup> Tanchanok Wanjai,<sup>b</sup> Natechanok Thinkumrob,<sup>b</sup> Julianna Oláh,<sup>c</sup>  
James R. Ketudat Cairns,<sup>d</sup> Supa Hannongbua,<sup>e</sup> Ulf Ryde<sup>f</sup> and Jitrayut Jitonnom\*<sup>b</sup>

<sup>a</sup> *Demonstration School, University of Phayao, Phayao 56000, Thailand;* <sup>b</sup> *Unit of Excellence in Computational Molecular Science and Catalysis, and Division of Chemistry, School of Science, University of Phayao, Phayao 56000, Thailand;* <sup>c</sup> *Department of Inorganic and Analytical Chemistry, Budapest University of Technology and Economics, Műgyetem rakpart 3, Budapest H-1111, Hungary;* <sup>d</sup> *Center for Biomolecular Structure, Function and Application and School of Chemistry, Institute of Science, Suranaree University of Technology, Nakhon Ratchasima 30000, Thailand;* <sup>e</sup> *Department of Chemistry, Faculty of Science, Kasetsart University, Bangkok 10900 Thailand;* <sup>f</sup> *Department of Theoretical Chemistry, Lund University, Chemical Centre, P.O. Box 124, Lund SE-221 00, Sweden*

\*Correspondence to Jitrayut Jitonnom, E-mail: [jitrayut.018@gmail.com](mailto:jitrayut.018@gmail.com), [jitrayut.ji@up.ac.th](mailto:jitrayut.ji@up.ac.th),  
Tel.: +66 54 466 666; fax: +66 54 466 664.

### Table of Content

|                                                                                                                | <b>Pages</b> |
|----------------------------------------------------------------------------------------------------------------|--------------|
| 1. Results of Model I.....                                                                                     | S2           |
| 2. Effects of dielectric constant and dispersion: results of Model II.....                                     | S5           |
| 3. Results of Model II: DHU, L-DHT, D-DHT, HYD, DHO,<br>5FU, 5FUH2.....                                        | S7           |
| 4. Binding interaction energies in <i>SkDHPase</i> and <i>SmDHPase</i> .....                                   | S18          |
| 5. <i>In silico</i> point mutation of stereo-gate-loop (SGL) residues in <i>SkDHPase</i> :<br>Y172F, L72F..... | S19          |
| 6. References.....                                                                                             | S22          |
| 7. XYZ coordinates for all optimized structures in Model II.....                                               | S23          |

## 1. Results of Model I

For comparison purposes, we first designed a small model (hereafter Model I) of the (*S. kluyveri*) dihydropyrimidinase (*SkDHPase*) active site, containing only substrate (dihydropyrimidines DHU/DHT, hydantoid HYD or dihydroorotate DHO; see Scheme 2), the two zinc ions, and their ligands (namely, His62, His64, His199, His255, the carboxylated lysine Kcx167, and the catalytic residue Asp358). Asp358 was deprotonated and the four histidines were singly protonated on the N atom not coordinated to Zn. The resulting models consist of 81–83 atoms and have a total charge of +1, except for DHO which has zero net charge, owing to the negative charge of the COO<sup>-</sup> group. This model lacks the important substrate-binding residues of the SGLs and, therefore, it is not expected to rationalize the enzyme substrate specificity and stereospecificity. Nevertheless, it still provides important information on the intrinsic reaction energetics, mechanism, and the transition states of the active site, which will be used for comparison when discussing the impact of SGLs by Model II within the main text.

We first examined how the results of Model I for DHU hydrolysis change if the continuum-solvation (CPCM) model is included or not, as shown in Figure S1. The results show that the solvation significantly affects the shape of the energy profile: The dielectric constant increases the activation energies and reaction energies, especially for the ring-opening step (INT1 → EP, Figure S1) involving the protonation of the cyclic amide ring of the substrate, assisted by Asp358 (see mechanistic detail in Scheme 1B). In particular, the activation barrier for the DHU hydrolysis is 21.9 kcal mol<sup>-1</sup> with the CPCM solvation ( $\epsilon=4$ ), which is high compared to the experimental value (17.9 kcal mol<sup>-1</sup>, estimated from  $k_{\text{cat}} = 2 \text{ s}^{-1}$  in *SmDHPase* (1) and transition state theory). Similar results were also found for the hydrolysis of other substrates of cyclic amidohydrolases, shown in Scheme 2, using Model I and the CPCM( $\epsilon=4$ ) model, as summarized in Figure S2. The results of Model I show relatively high energy profiles for most substrates with the activation barriers of 17.5–22.3 kcal mol<sup>-1</sup>. These data suggest us that this model is too small to rationalize the stereospecificity of DHPase. Similar results have also been reported that a small model might not account well enough for the different electronic properties and flexibility of the surrounding environment (2). Therefore, a more realistic representation of the active site is required, so we generated Model II and used it for further discussion in the main text.

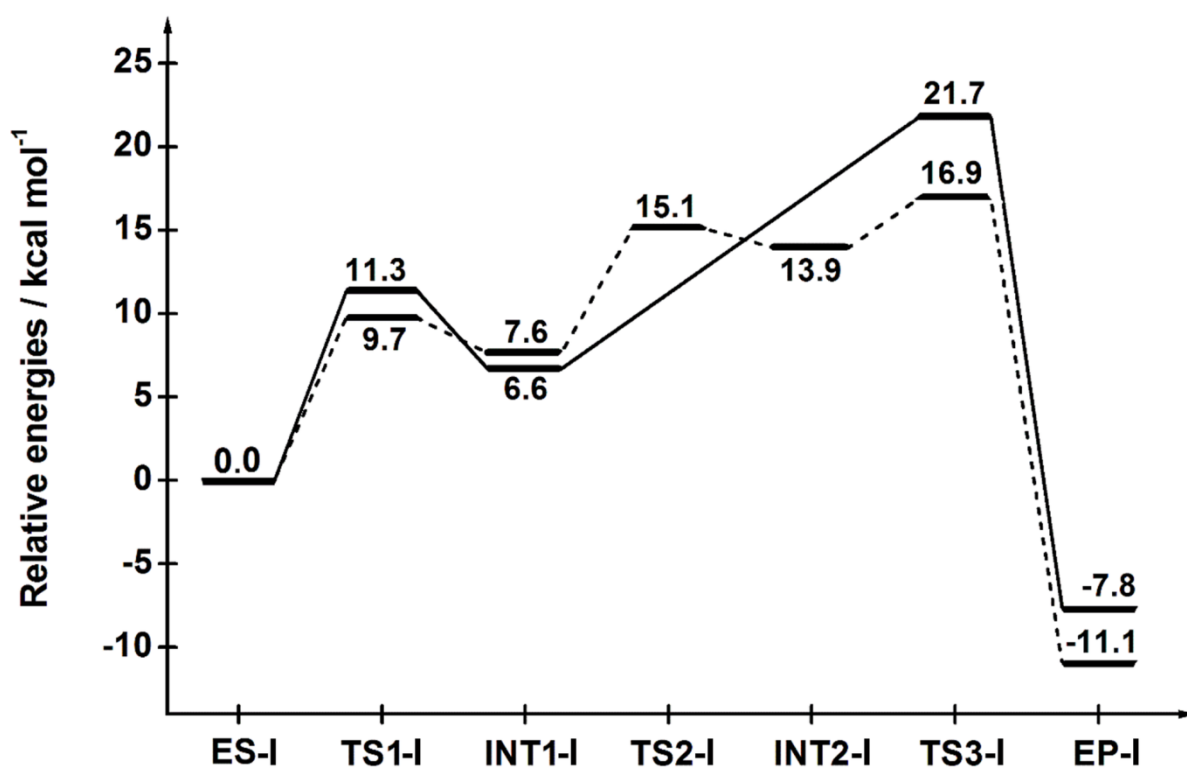

**Figure S1.** Calculated energy profiles for hydrolysis of DHU by *SkDHPase* in Model I. cluster + CPCM ( $\epsilon=4$ ) (—) and cluster (-----).

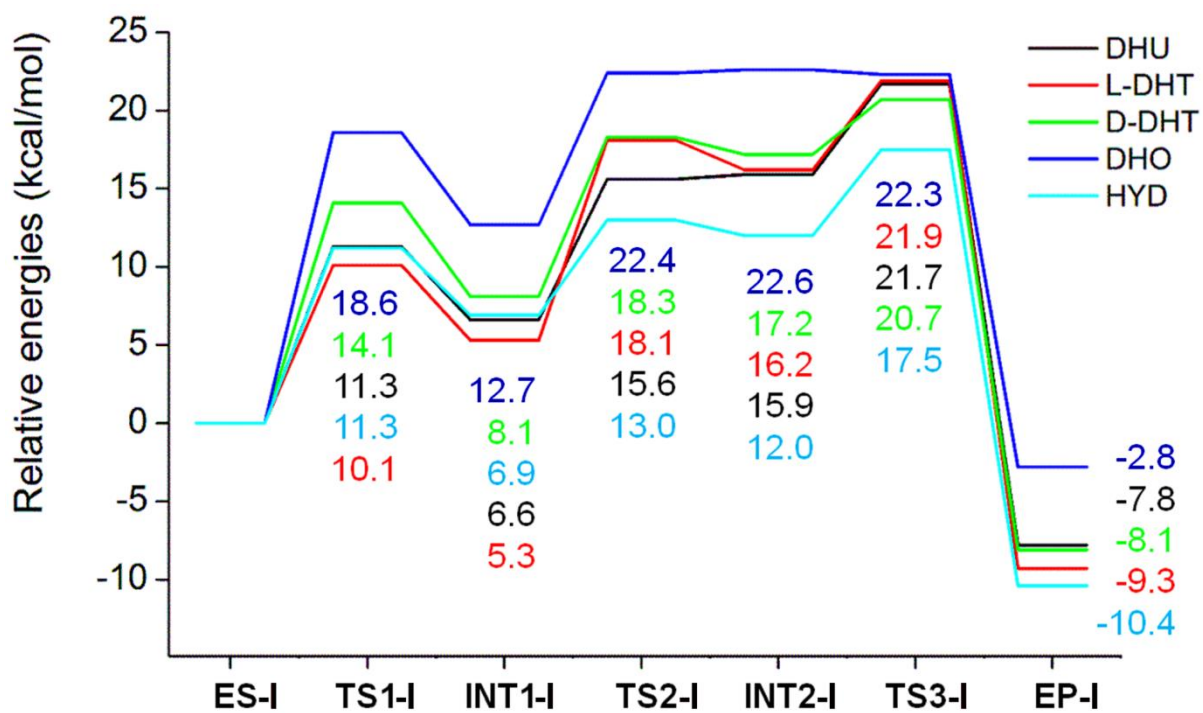

**Figure S2.** Calculated energy profiles for *SkDHPase*-catalyzed hydrolysis of the substrates of cyclic amidohydrolases (DHU, *L*-DHT, *D*-DHT, DHO, HYD; see Figure 1) in Model I. Reported energies are corrected for ZPE and solvation (CPCM and  $\epsilon=4$ ).

## 2. Effects of dielectric constant and dispersion: results of Model II

In order to test the sensitivity of the large model (Model II) with the solvent dielectric, the energy profile of DHU hydrolysis was computed using the CPCM calculations with different dielectric constants ( $\epsilon = 1.0, 4.0$  and  $78.4$  mimicking gas-phase, protein and water, respectively). The results of the Model II calculations (Figure S3 and Table S1) yielded almost identical computed energy profiles at  $\epsilon = 4.0$  and  $\epsilon = 78.4$ , which shows that the size of Model II is large enough for further investigations. Thus, we chose Model II to describe the catalytic mechanism and the stereospecificity of DHPase in the main text.

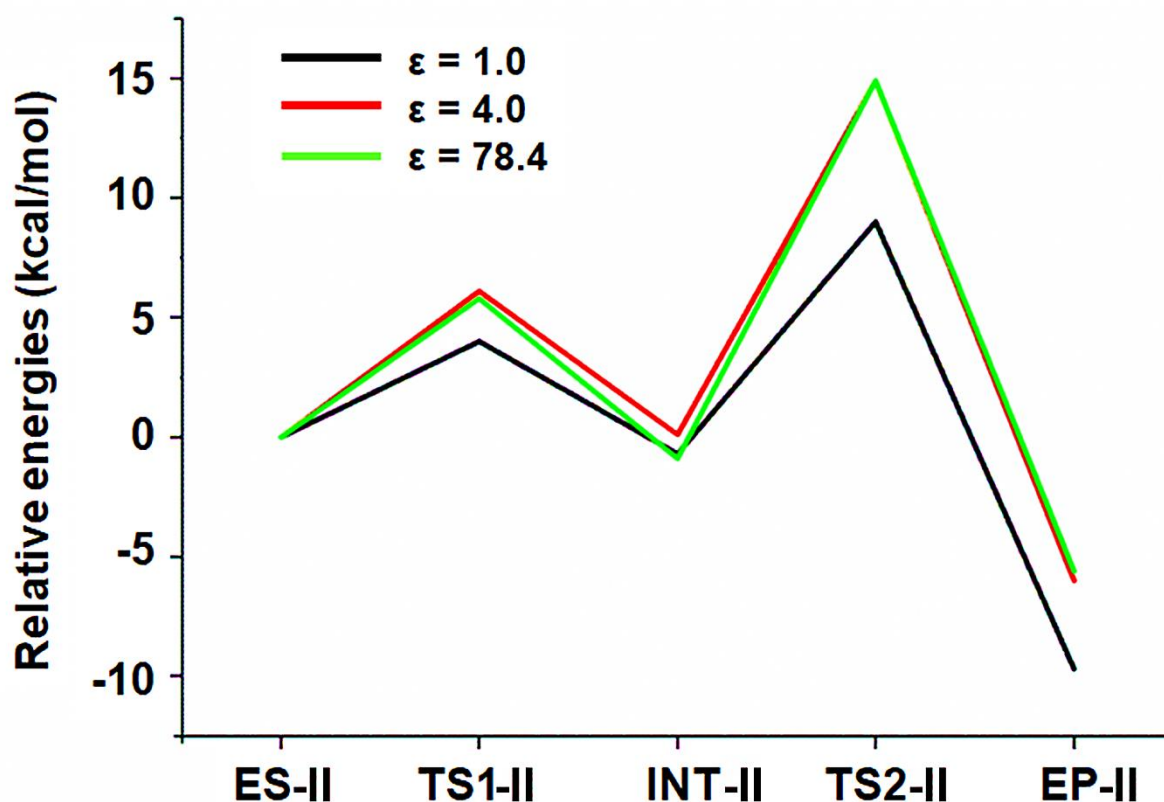

**Figure S3.** Effects of different dielectric constants ( $\epsilon$ ) on the relative energies of the DHU hydrolysis in **Model II** obtained at the B3LYP/6-311+G(2d,2p) level with CPCM ( $\epsilon=1.0, 4.0, 78.4$ ).

**Table S1.** Effect of the solvation energy (dielectric constant) and the inclusion of dispersion energy ( $E_{\text{disp}}$ ) for the various states in the DHU hydrolysis in Model II (also shown in Figure S3).

| Structure | $\epsilon = 1.0$ | $\epsilon = 4.0$ | $\epsilon = 78.4$ | Solvation ( $\epsilon = 4$ ) + $E_{\text{disp}}$ |
|-----------|------------------|------------------|-------------------|--------------------------------------------------|
| ES-II     | 0.0              | 0.0              | 0.0               | 0.0                                              |
| TS1-II    | 6.5              | 6.0              | 5.7               | 6.1                                              |
| INT-II    | 2.0              | -0.5             | -1.6              | 0.1                                              |
| TS2-II    | 17.3             | 17.4             | 17.4              | 14.9                                             |
| EP-II     | -7.7             | -7.0             | -6.6              | -6.0                                             |

### 3. Results of Model II: DHU, L-DHT, D-DHT, HYD, DHO, 5FU, 5FUH2

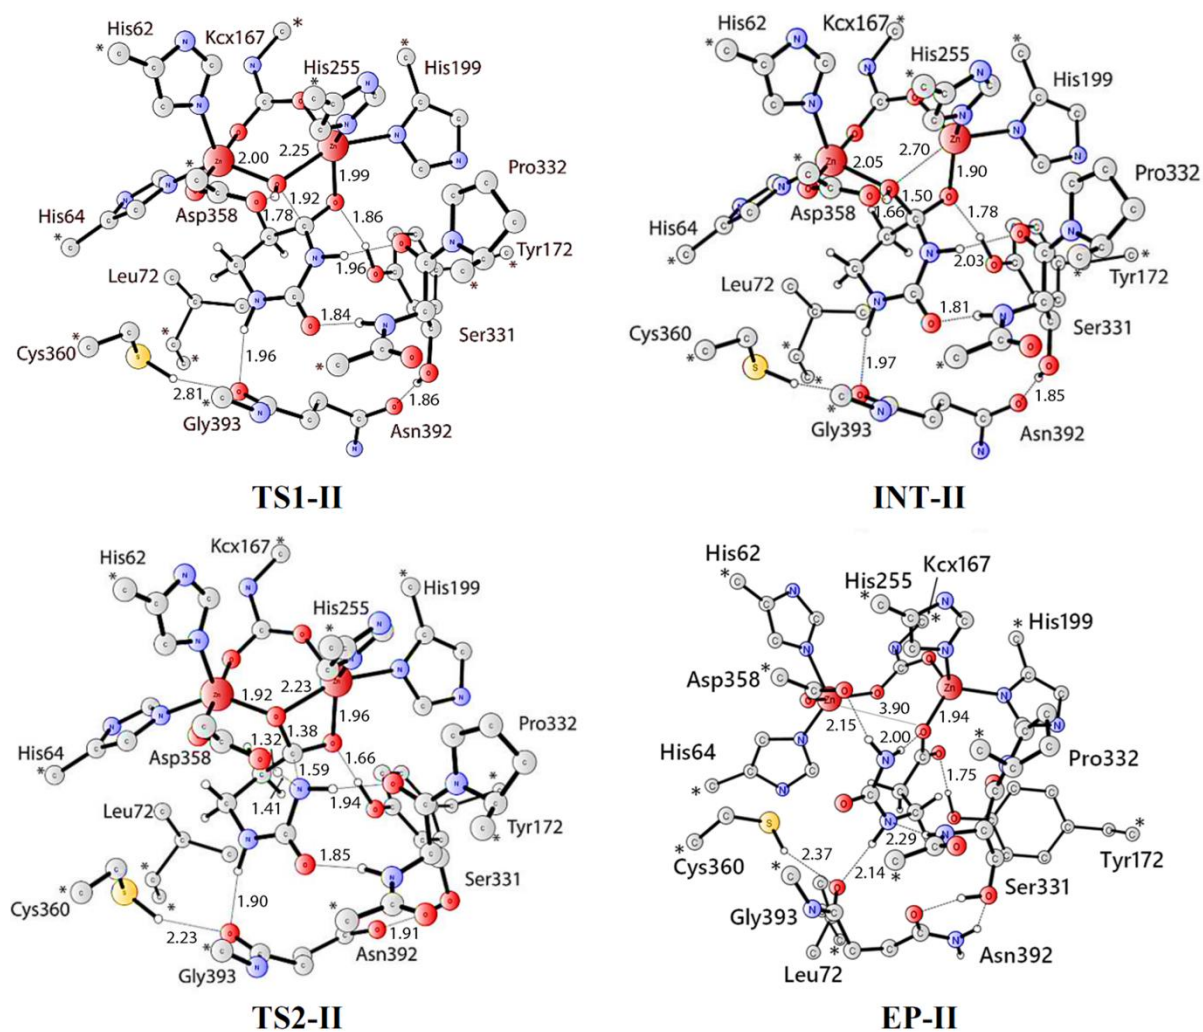

**Figure S4.** Optimized stationary points (TS1-II, INT-II, TS2-II, and EP-II) for the hydrolysis of DHU in Model II. Distances are in Å. Fixed atoms are shown by an asterisk. For clarity, only selected hydrogen atoms are shown.

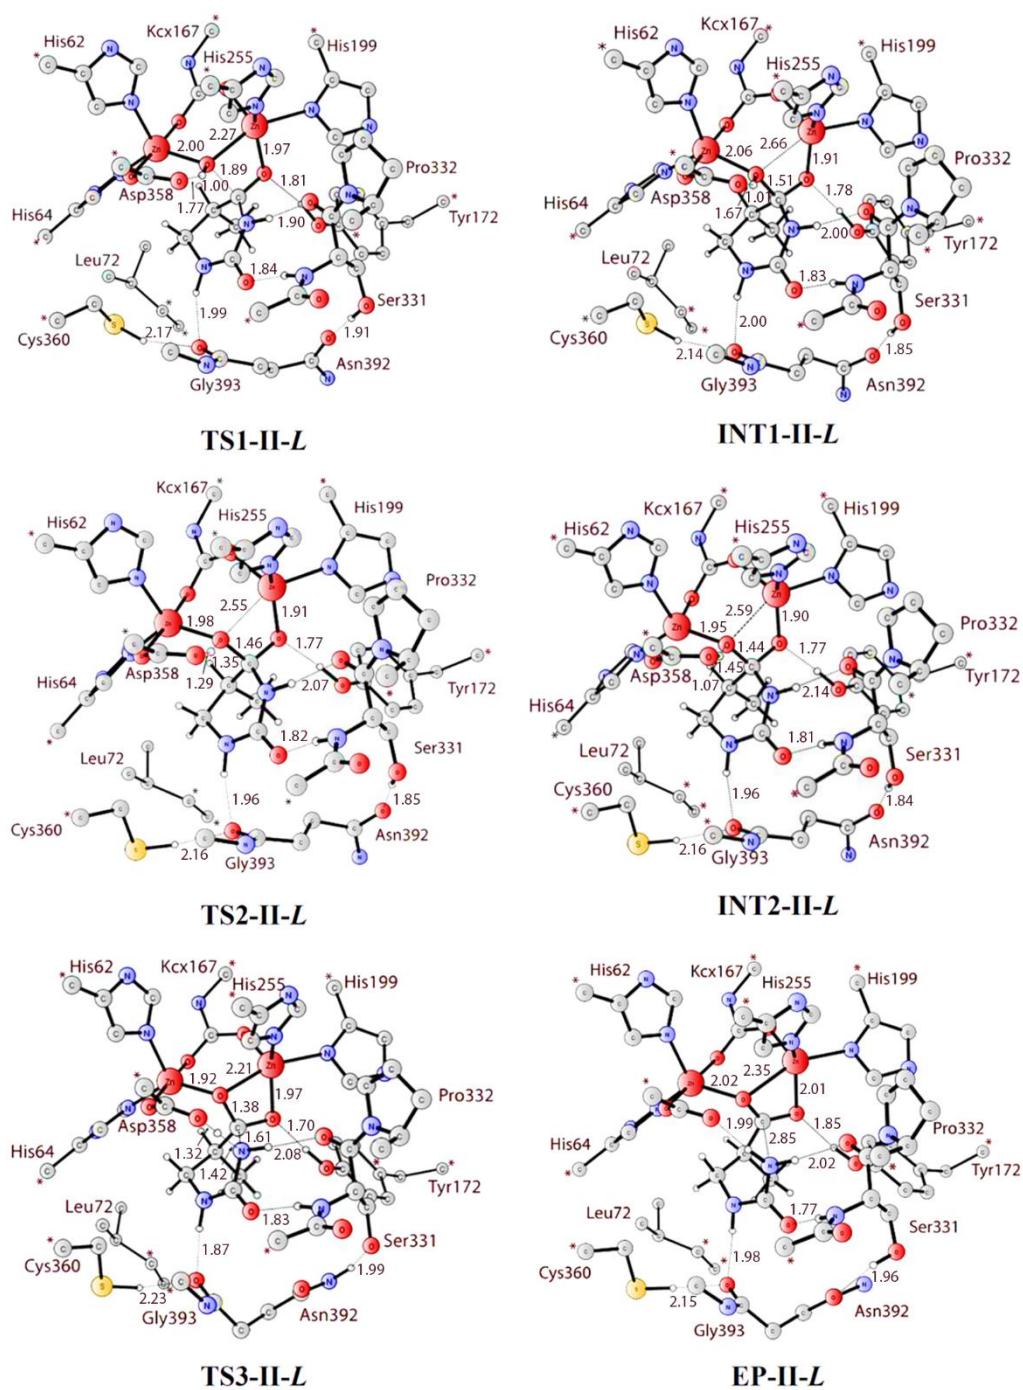

**Figure S5.** Optimized stationary points for the hydrolysis of *L*-DHT in Model II. Distances are in Å. Fixed atoms are shown by an asterisk.



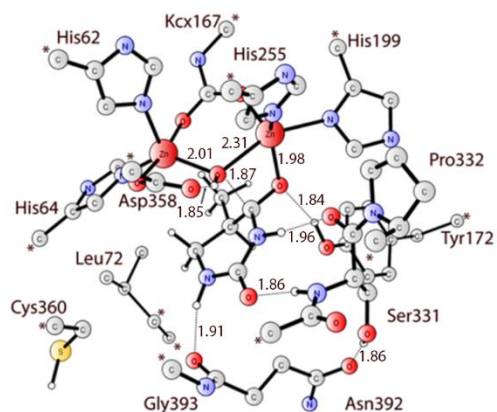

**TS1-II-D**

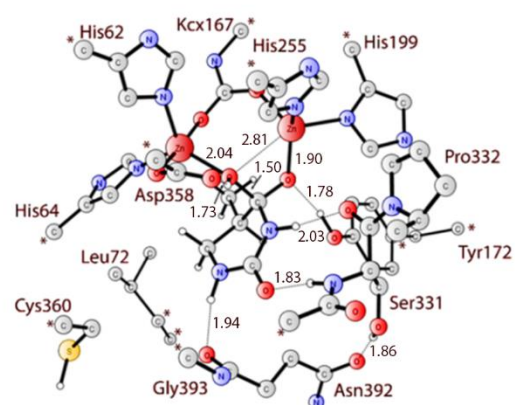

**INT1-II-D**

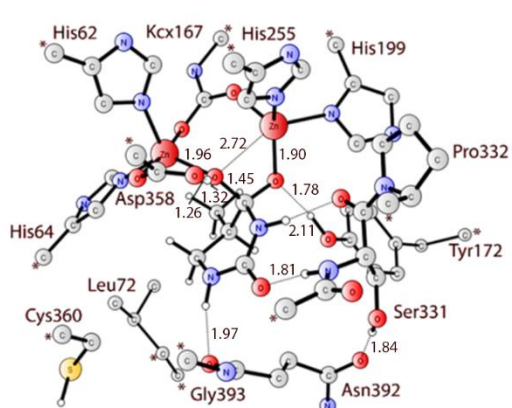

**TS2-II-D**

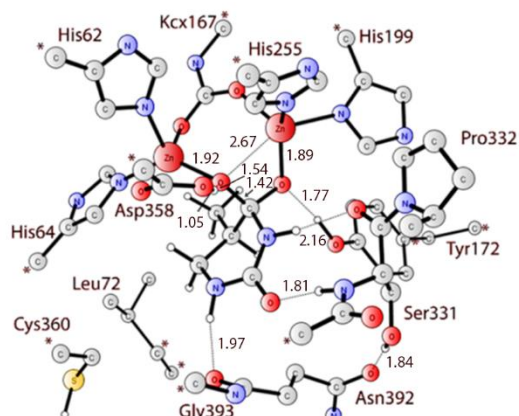

**INT2-II-D**

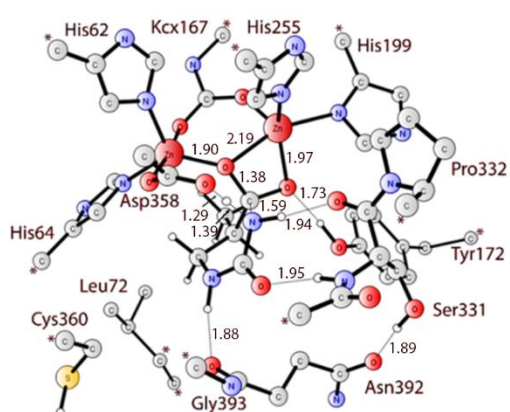

**TS3-II-D**

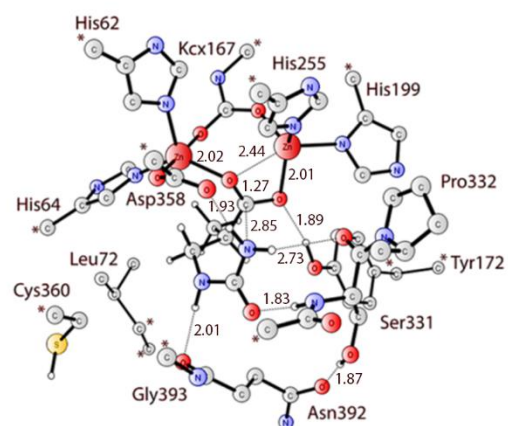

**EP-II-D**

**Figure S6.** Optimized stationary points for hydrolysis of *D*-DHT by *SkDHPase* in Model II. Distances are in Å. Fixed atoms are shown by an asterisk.

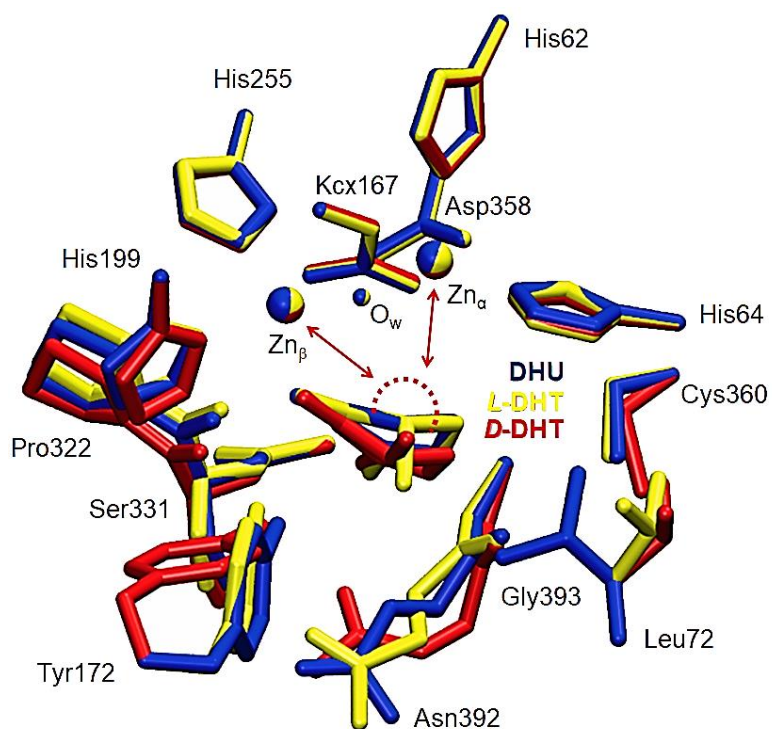

**Figure S7.** Overlay of the optimized structures of the ES-II with DHU (blue), *L*-DHT (yellow) and *D*-DHT (red) as substrates. The repulsion between the R group of the substrate and the zinc metals is also indicated with red dotted semicircle and the two-headed arrows.

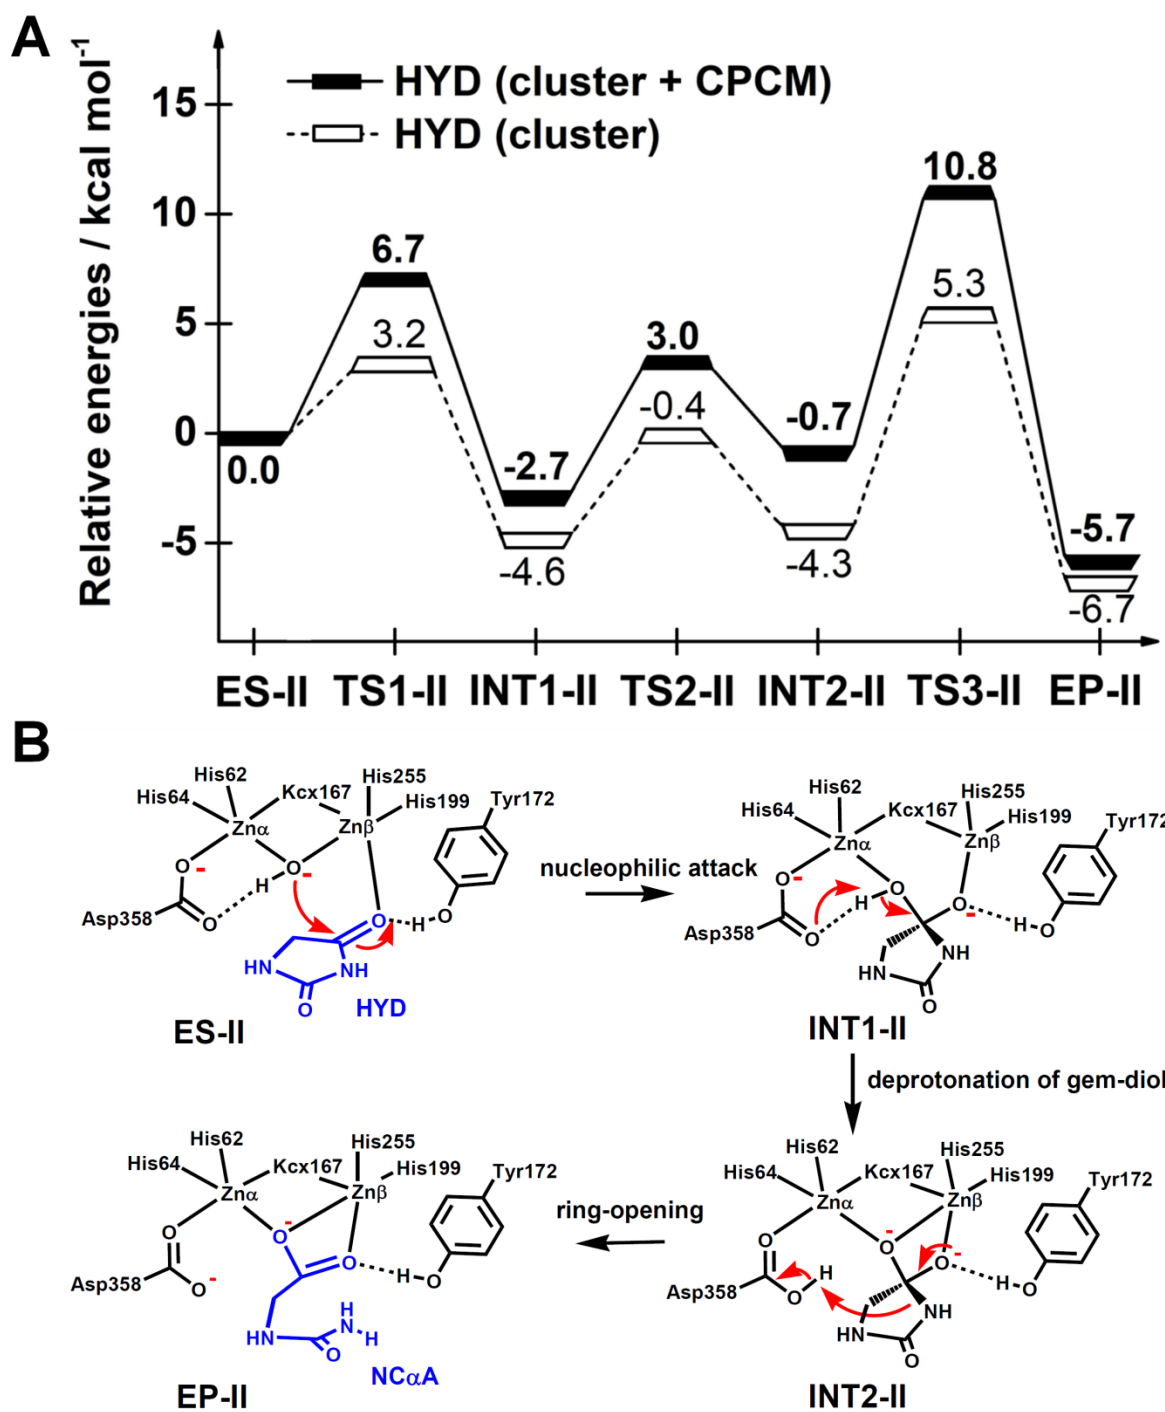

**Figure S8.** (A) Calculated energy profile for the hydrolysis of hydantoin (HYD) into *N*-carbamyl- $\alpha$ -amino acid (NC $\alpha$ A) by *Sk*DHPase in Model II; cluster + CPCM (—) and cluster (····). Energies were obtained at the B3LYP-D3/6-311+G(2d,2p)(CPCM,  $\epsilon=4$ )/B3LYP/6-31G(d,p) level of theory. (B) Suggested mechanism for the HYD hydrolysis in *Sk*DHPase.

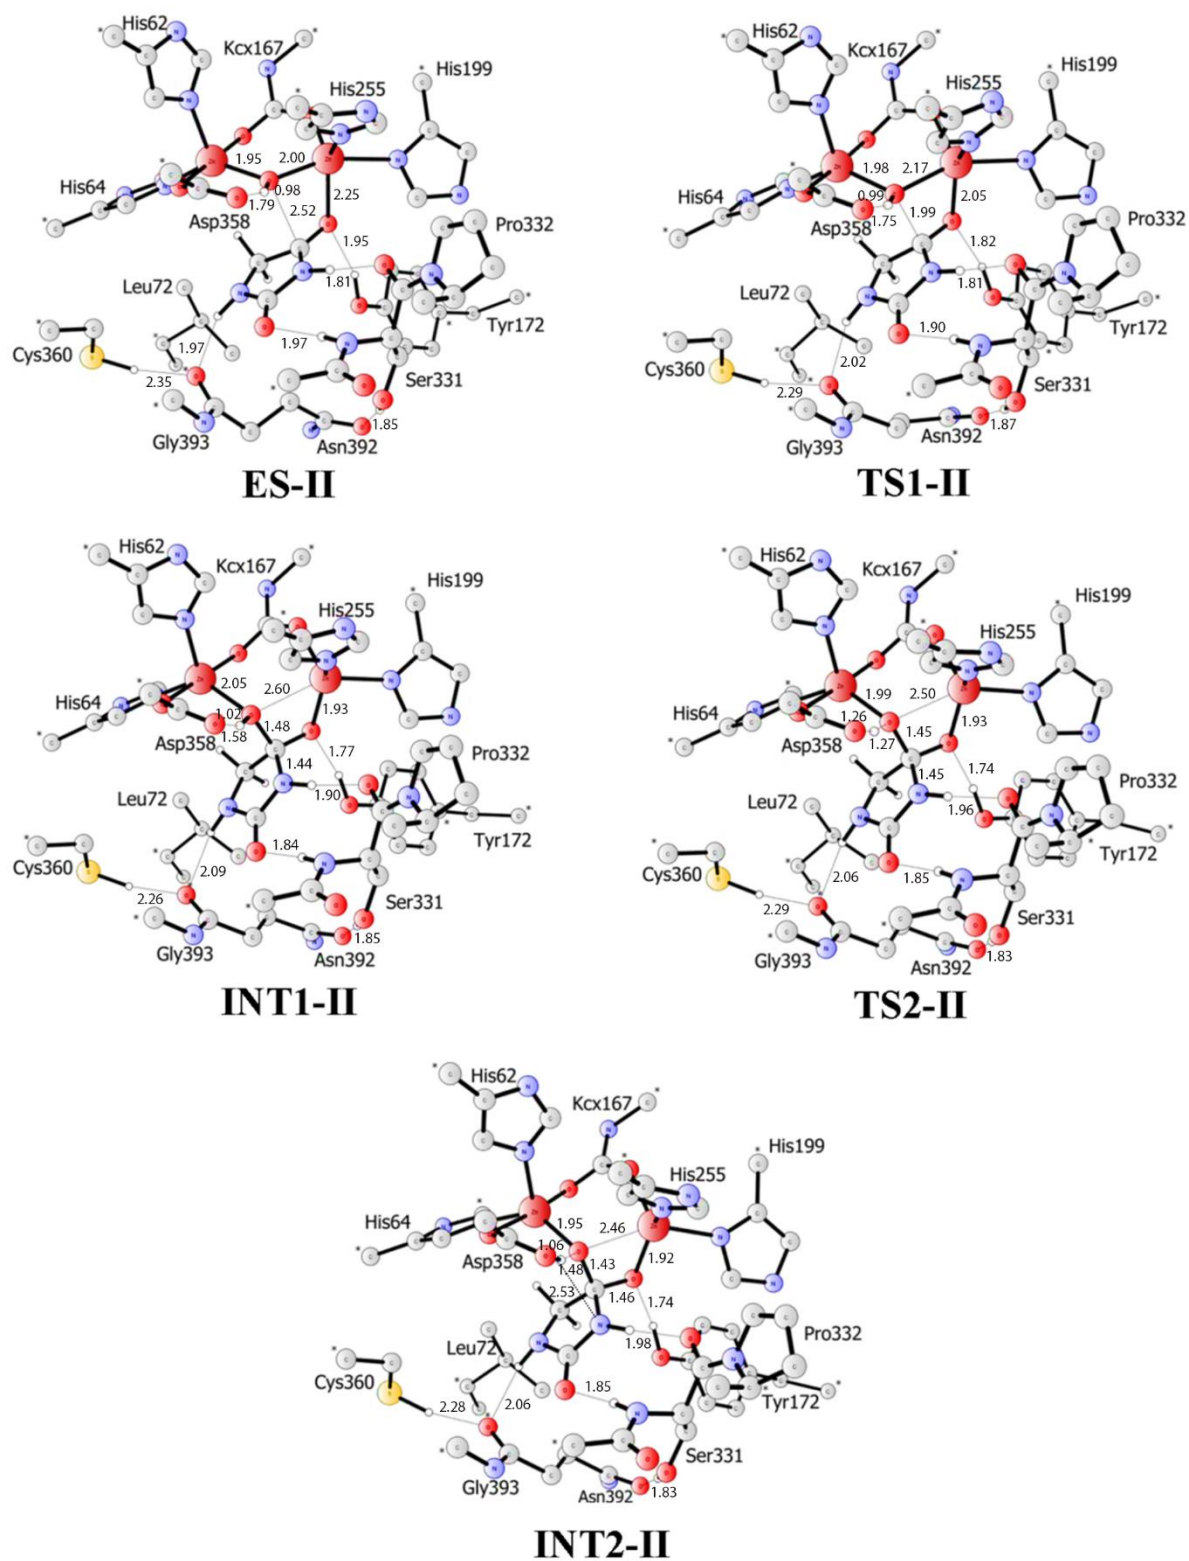

**Figure S9.** Optimized stationary points for the hydrolysis of HYD by *SkDHPase* in Model II. Distances are in Å. Fixed atoms are shown by an asterisk.

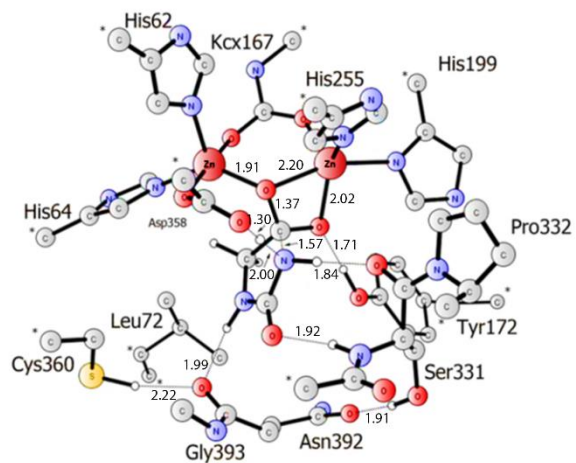

**TS3-II**

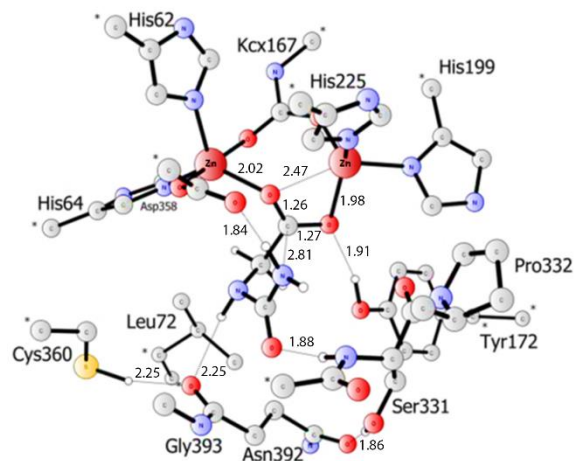

**EP-II**

**Figure S9.** Continued.

**Reaction mechanism of DHO hydrolysis by *SkDHPase*.** Starting from the ES, the hydroxide performs a nucleophilic attack on the C4 atom of the substrate and a tetrahedral intermediate (INT) is formed with a C4–O<sub>w</sub> bond length of 1.51 Å. The barrier of this step is 12.0 kcal mol<sup>-1</sup> at TS1. During this step, the coordination number of Zn $\beta$  changes from 5 to 4, due to the elongation of Zn $\beta$ –O<sub>w</sub> distance (1.98 Å at ES to 2.64 Å at INT). The shortening of the two distances between the substrate carbonyl oxygen (O4) to Zn $\beta$  and Tyr172 from ES to INT (O4–Zn $\beta$  = 1.94 Å at ES to 1.89 Å at INT and O4...HO@Tyr172 = 1.85 Å at ES to 1.75 Å at INT, Figure S11) indicates that these groups play roles in the stabilization of the transition state. The next step is the opening of the DHO ring and Asp358 plays a dual role by shuttling the proton from the hydroxide ion in INT to the nitrogen leaving group. This step was found to occur simultaneously through TS2. The scissile C–N bond is 1.59 Å and the transferring proton is in between the carboxylate group of Asp and the ring nitrogen (1.26 Å and 1.40 Å). After TS2, the C4–N3 bond is fully broken with a distance of 2.73 Å, and the product carbamoyl aspartate is formed.

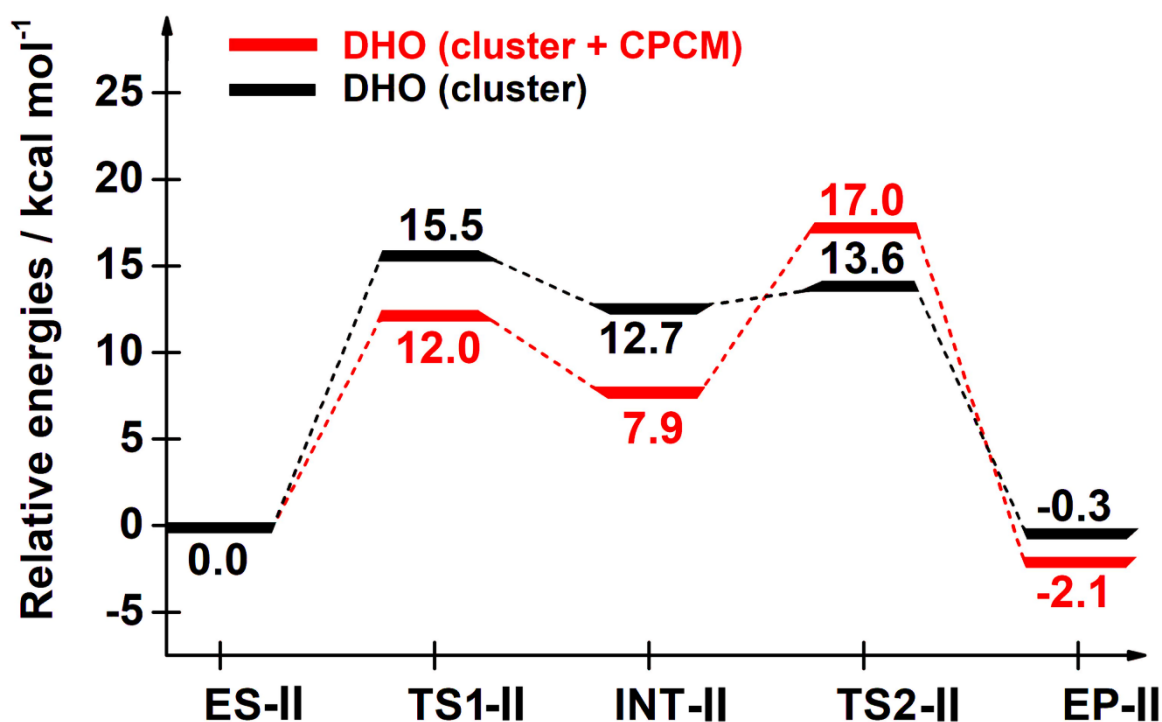

**Figure S10.** Calculated energy profile for the hydrolysis of DHO by *SkDHPase* in Model II; cluster + CPCM (black) and cluster (red). Energies were obtained at the B3LYP-D3/6-311+G(2d,2p)(CPCM,  $\epsilon=4$ )/B3LYP/6-31G(d,p) level of theory.

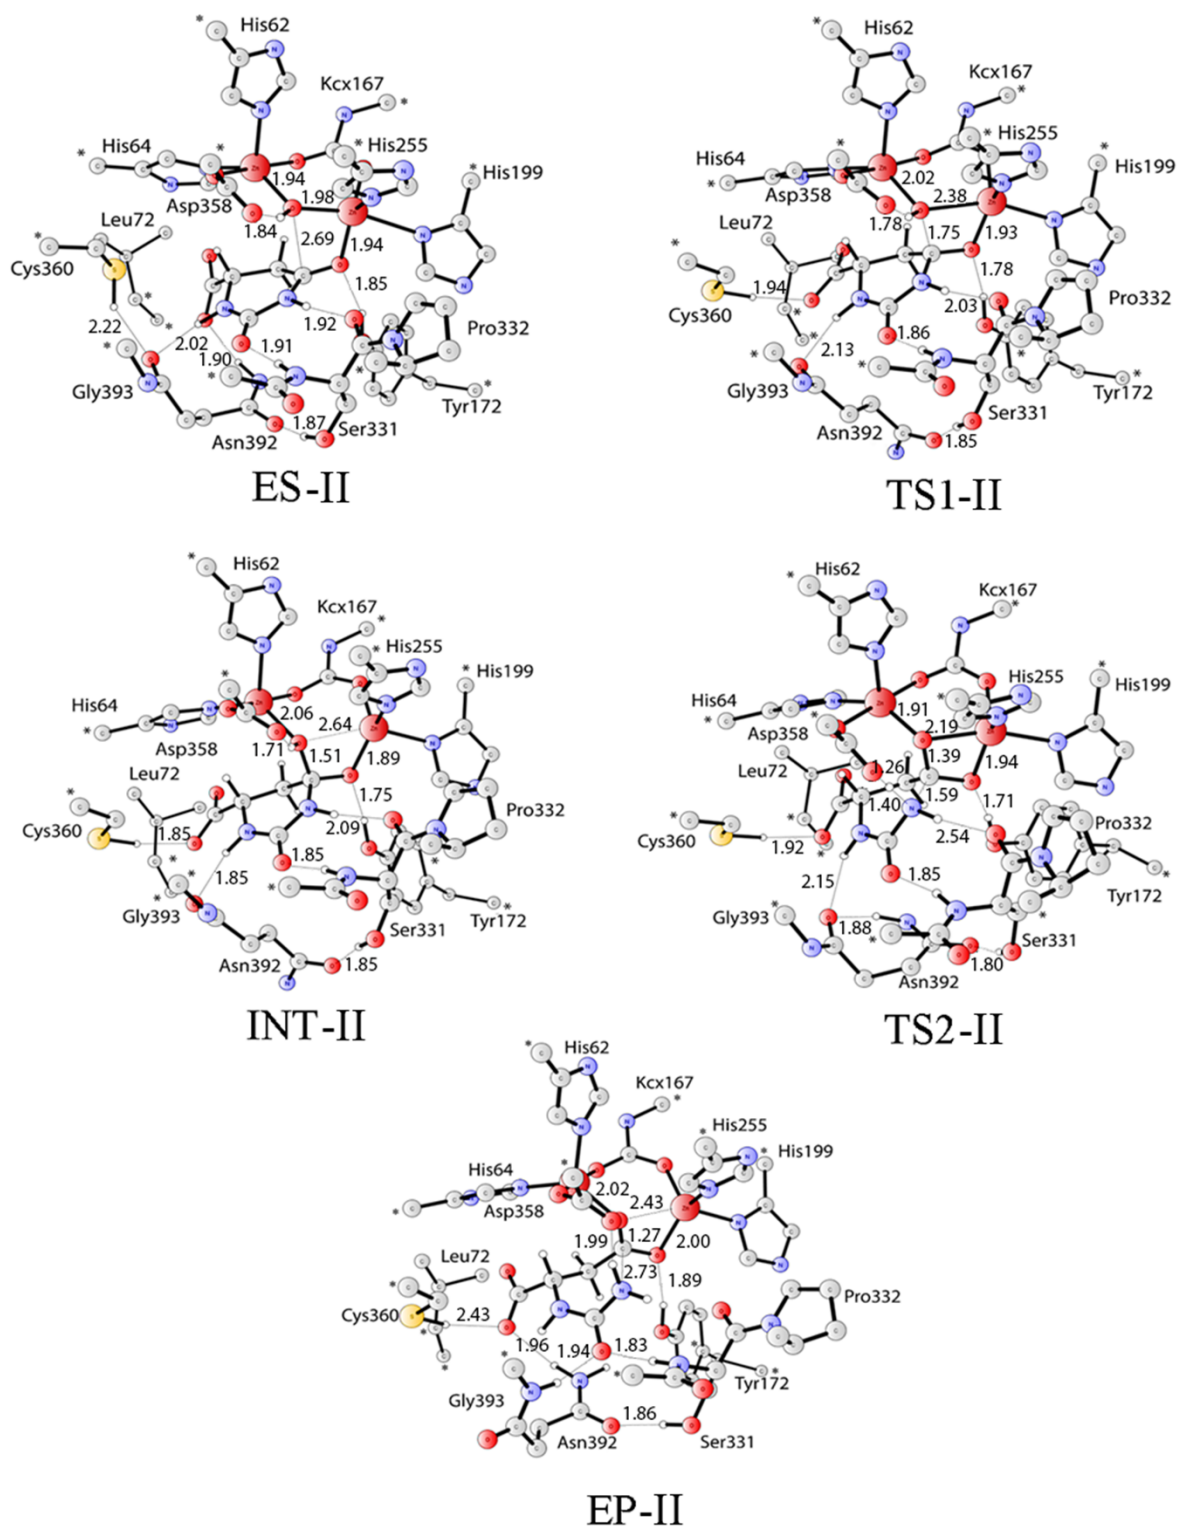

**Figure S11.** Optimized stationary points for the hydrolysis of DHO by *SkDHPase* in Model II. Distances are in Å. Fixed atoms are indicated by asterisks.

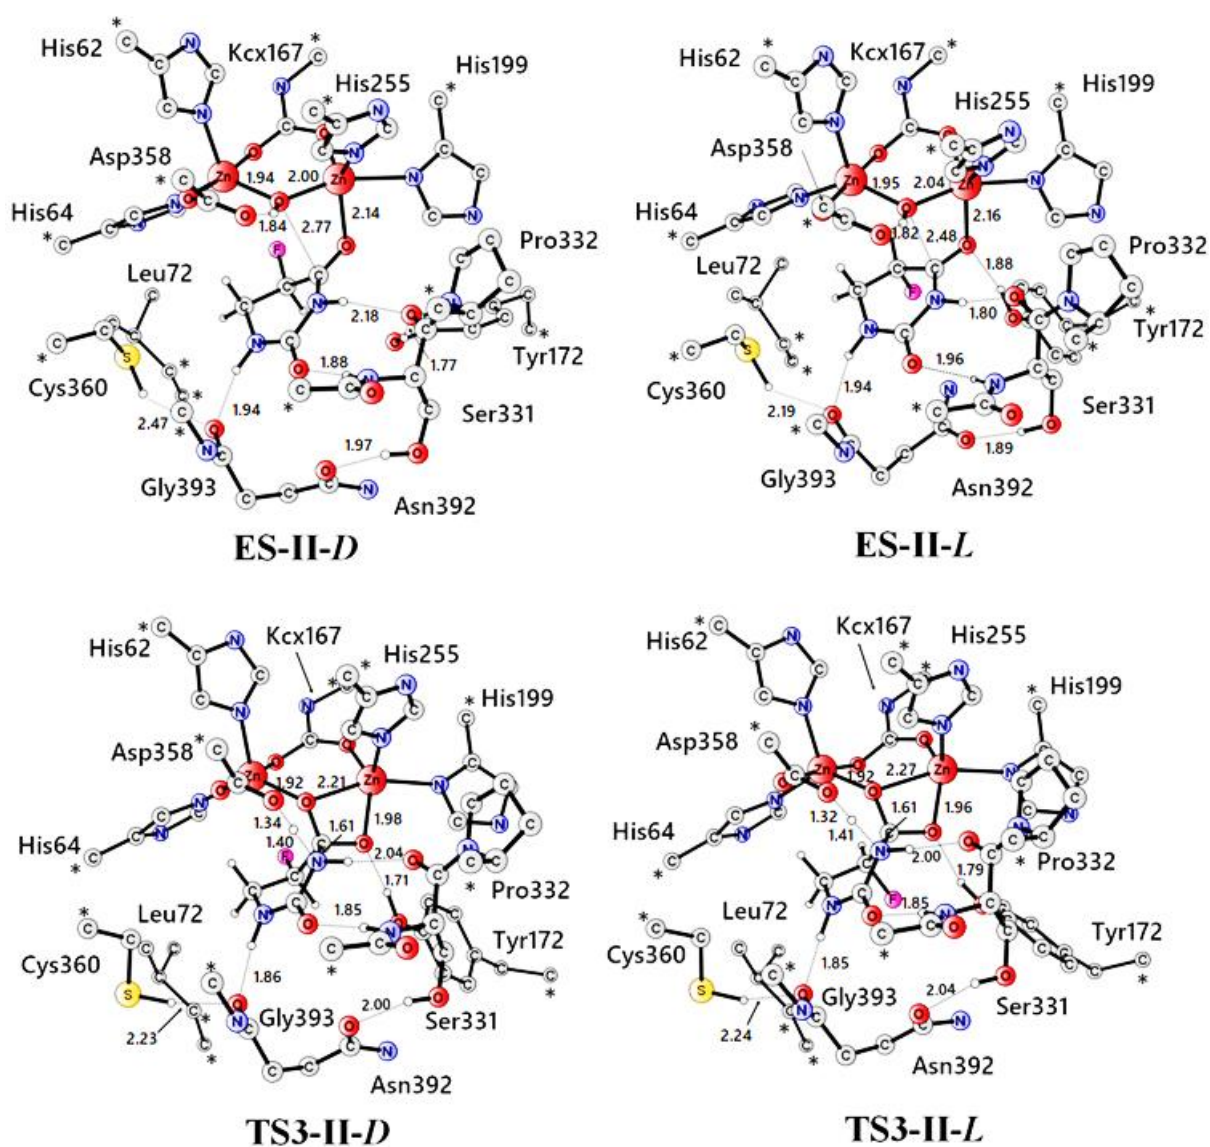

**Figure S12.** Optimized structures of the *SkDHPase-5FUH2* complexes at **ES-II** and **TS3-II** in *L*- and *D*-configurations in Model II. Distances are given in Å. Fixed atoms are indicated by asterisks.



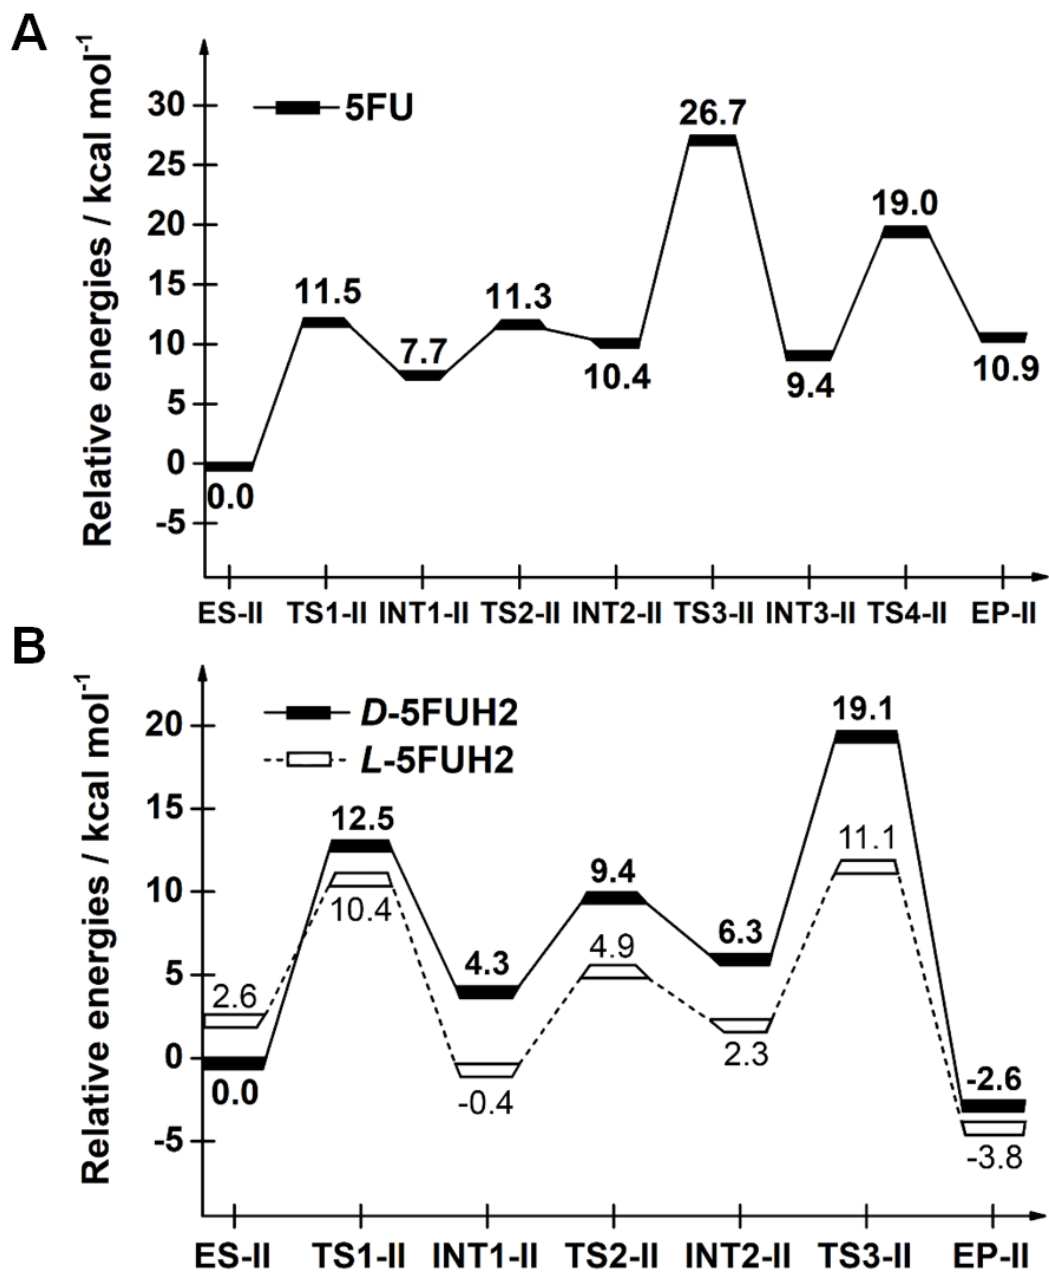

**Figure S13.** Calculated energy profiles for the hydrolysis of 5-fluorouracil (5FU) and dihydro-5-fluorouracil in either *L*- or *D*-configurations (*L*-5FUH2 and *D*-5FUH2) in Model II. Relative energies were obtained at the B3LYP-D3/6-311+G(2d,2p)(CPCM,  $\epsilon=4$ )/B3LYP/6-31G(d,p) level of theory.

#### 4. Binding interaction energies in *Sk*DHPase and *Sm*DHPase

**Table S2.** Binding energies (BE, kcal mol<sup>-1</sup>) for different substrates in the active site pocket of *Sk*DHPase and *Sm*DHPase, obtained using the B3LYP and B3LYP-D3 methods

| Substrate                                     | B3LYP            |                  |          | B3LYP-D3         |                  |          |
|-----------------------------------------------|------------------|------------------|----------|------------------|------------------|----------|
|                                               | <i>Sk</i> DHPase | <i>Sm</i> DHPase | $\Delta$ | <i>Sk</i> DHPase | <i>Sm</i> DHPase | $\Delta$ |
| HYD                                           | -6.0             | -11.3            | 5.4      | -30.2            | -39.1            | 8.9      |
| (5 <i>R</i> )-MeHYD                           | +10.9            | -7.8             | 18.7     | -16.4            | -37.4            | 21.0     |
| (5 <i>S</i> )-MeDHU                           | +8.5             | -6.2             | 14.7     | -22.4            | -40.8            | 18.4     |
| (5 <i>S</i> ,6 <i>S</i> )-Me <sub>2</sub> DHU | -11.1            | -7.3             | 3.8      | -39.6            | -43.9            | 4.3      |
| (5 <i>S</i> ,6 <i>R</i> )-Me <sub>2</sub> DHU | -13.1            | -8.5             | 4.6      | -46.5            | -45.2            | 1.3      |

## 5. *In silico* point mutation of stereo-gate-loop (SGL) residues in *SkDHPase*: Y172F, L72F

**Table S3.** Effects of Tyr172Phe and Leu72Phe *SkDHPase* mutants on the binding energies (BE, kcal mol<sup>-1</sup>) and activation energies  $E_a$  (Model II). The energies were obtained at the B3LYP/6-311+G(2d,2p) + CPCM( $\epsilon=4$ ) level of theory

| Substrate     | BE    |           |          | $E_a$ -II |           |          |
|---------------|-------|-----------|----------|-----------|-----------|----------|
|               | WT    | Tyr172Phe | Leu72Phe | WT        | Tyr172Phe | Leu72Phe |
| DHU           | -10.8 | -11.9     | -11.0    | 14.9      | 25.1      | 19.1     |
| <i>L</i> -DHT | -15.0 | -13.6     | -11.8    | 15.7      | 33.1      | 27.2     |
| <i>D</i> -DHT | -5.8  | -11.9     | -9.8     | 25.8      | 34.4      | 33.1     |
| HYD           | -6.0  | -10.8     | -11.5    | 10.8      | 25.5      | 16.2     |
| <i>L</i> -HYD | -6.8  | -9.2      | -6.7     | 16.9      | 26.7      | 21.8     |
| <i>D</i> -HYD | -11.1 | -11.0     | -8.9     | 14.4      | 23.3      | 17.2     |

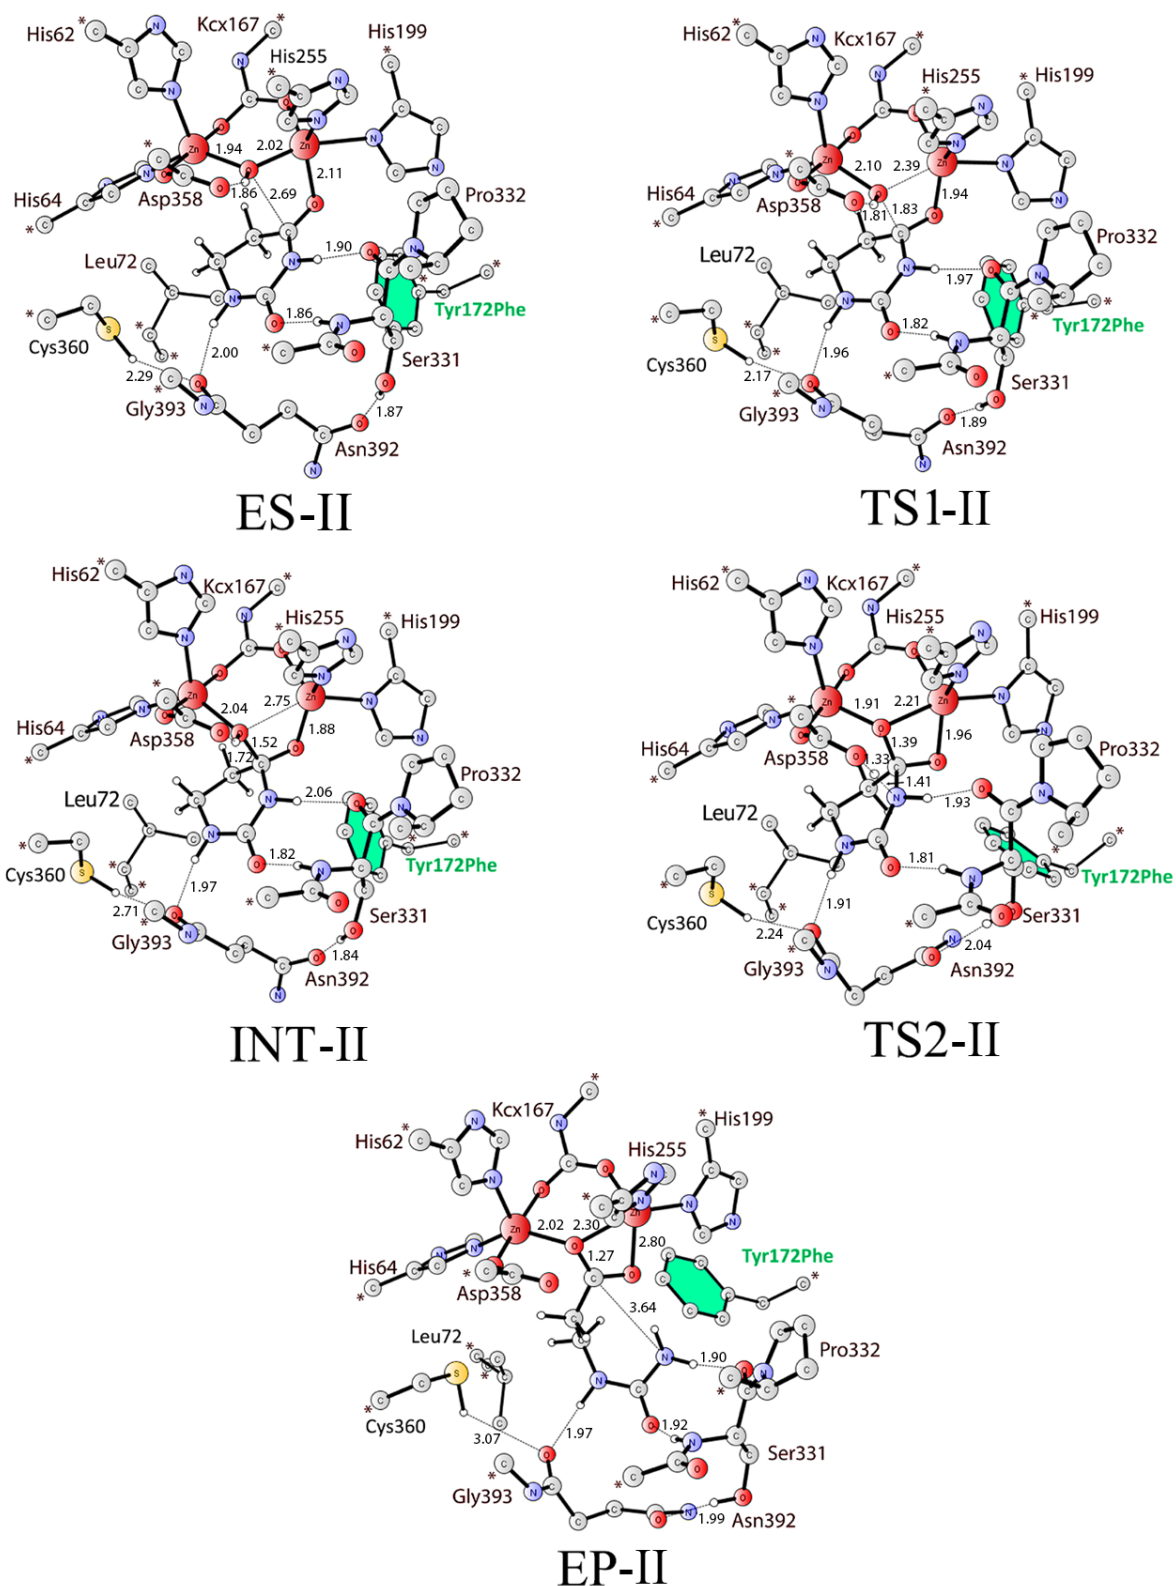

**Figure S14.** Optimized stationary points for the hydrolysis of DHU by the Y172F *SkDHPase* mutant in Model II. Distances are in Å. Fixed atoms are indicated by asterisks.

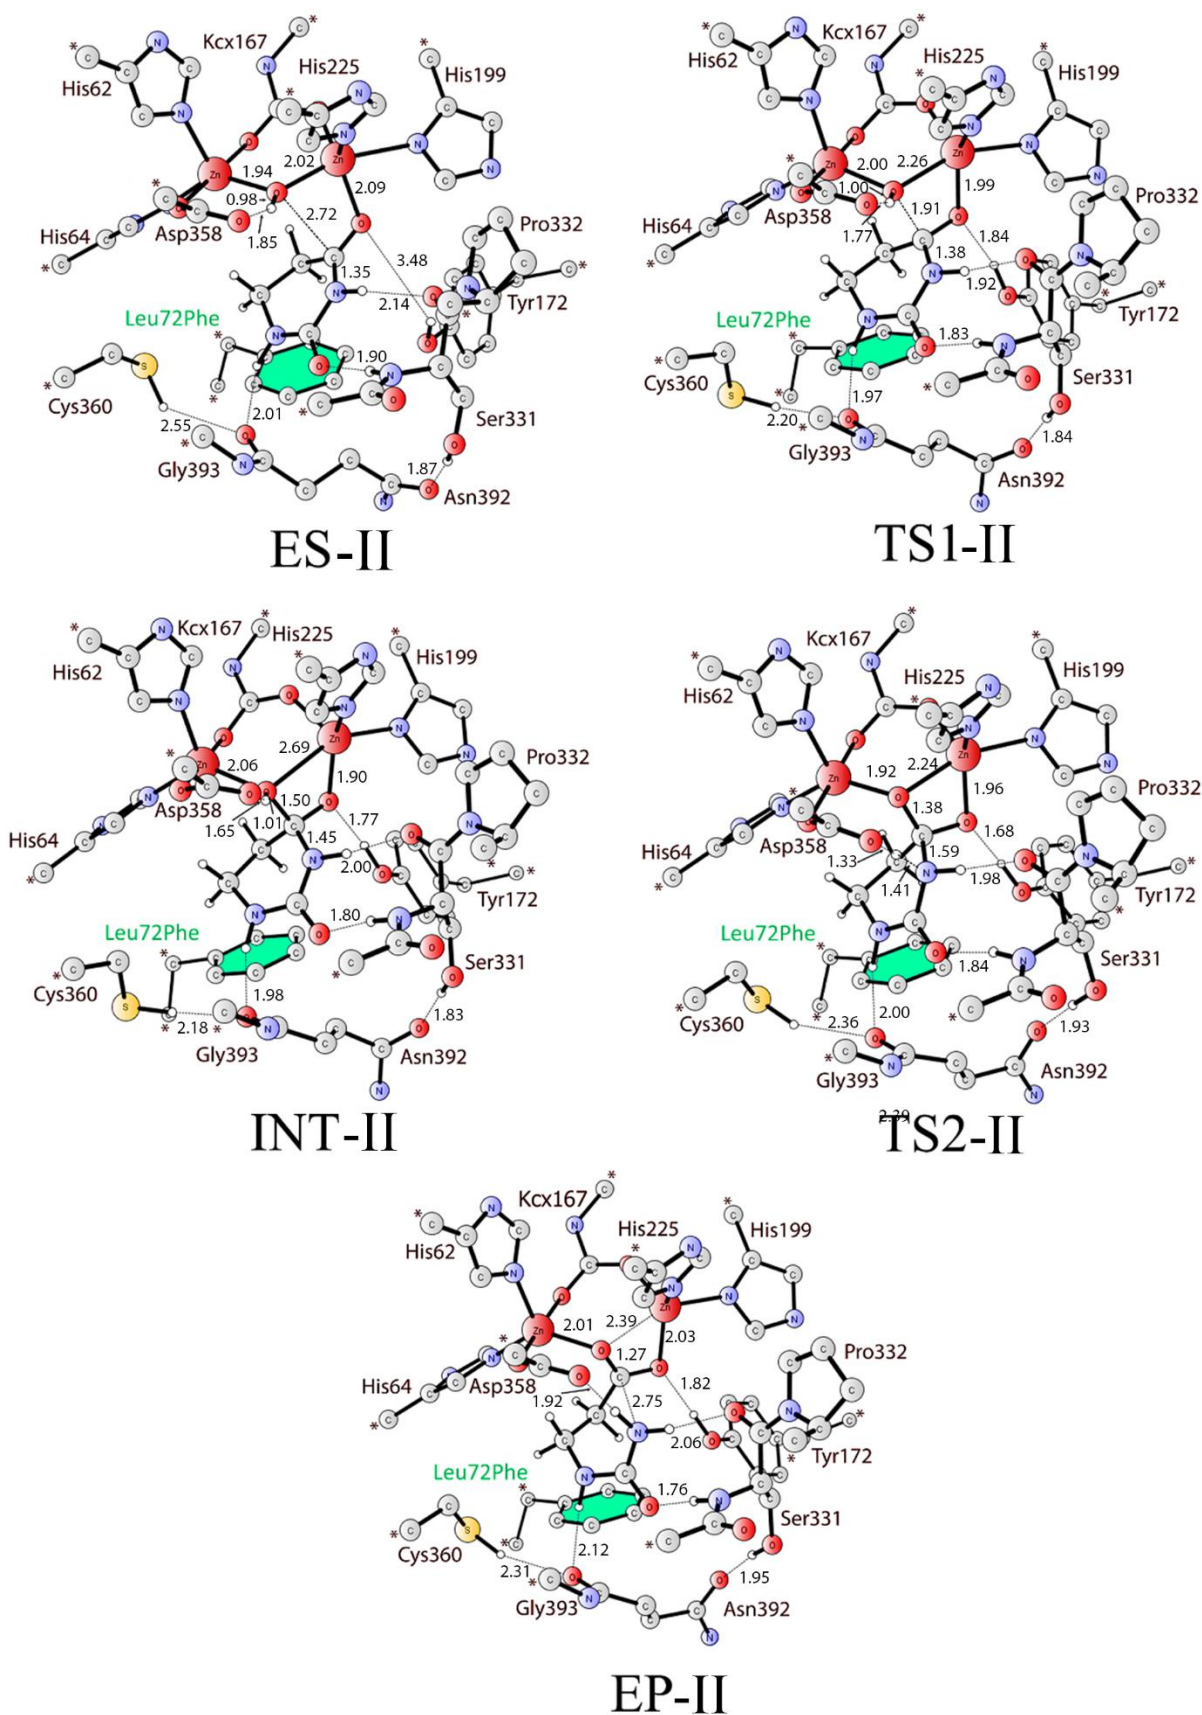

**Figure S15.** Optimized stationary points for the hydrolysis of DHU by the L72F *SkDHPase* mutant in Model II. Distances are in Å. Fixed atoms are marked by asterisks.

## 6. References

- 1) Martínez-Rodríguez, S., Martínez-Gómez, A. I., Clemente-Jiménez, J. M., Rodríguez-Vico, F., García-Ruíz, J. M., Las Heras-Vázquez, F. J., and Gavira, J. A. (2010) Structure of dihydropyrimidinase from *Sinorhizobium meliloti* CECT4114: New features in an amidohydrolase family member. *J. Struct. Biol.* **169**, 200-208
- 2) Jafari, S., Ryde, U., and Irani, M. (2016) Catalytic mechanism of human glyoxalase I studied by quantum-mechanical cluster calculations. *J. Mol. Catal. B: Enzym.* **131**, 18-30

## 7. XYZ coordinates for all optimized structures in Model II

### *S*kDHPase.DHU-ES-II

|    |             |             |             |   |             |             |             |
|----|-------------|-------------|-------------|---|-------------|-------------|-------------|
| C  | -8.43178100 | -2.04663400 | -1.93631500 | H | -5.55176400 | -2.68526600 | 1.65449800  |
| C  | -7.28193400 | -1.91423000 | -1.00573100 | H | -5.74627200 | 5.03349800  | -1.26421000 |
| N  | -7.10021700 | -2.66161700 | 0.14917400  | H | -4.81290700 | 5.86475200  | -0.01186000 |
| C  | -6.18675200 | -1.10415900 | -1.07247500 | H | -4.63111900 | 2.38252400  | -1.43999700 |
| C  | -5.92818400 | -2.28745700 | 0.72290500  | H | -4.97654700 | 4.08859500  | 2.38621200  |
| N  | -5.34649000 | -1.34775400 | -0.00326600 | H | -4.07326600 | 1.70780200  | 2.65091400  |
| C  | -5.54413200 | 5.06698400  | -0.19071700 | H | -1.21980100 | -4.52482300 | 4.37606500  |
| C  | -5.03480800 | 3.73965000  | 0.27591200  | H | 2.38713100  | -5.70281000 | 4.22551900  |
| N  | -4.83382000 | 3.44862700  | 1.61725700  | H | 3.68589600  | -4.22825700 | 2.58227600  |
| C  | -4.63647300 | 2.60406300  | -0.38396000 | H | 2.13839100  | -2.86321500 | 1.10846100  |
| C  | -4.32458600 | 2.19909800  | 1.72402600  | H | -3.11001100 | -4.42456100 | -3.69158000 |
| N  | -4.19075400 | 1.65962200  | 0.52441500  | H | -2.22508300 | -5.93991200 | -3.90222700 |
| C  | -4.12449500 | -3.30869200 | 4.37224900  | H | -2.17324700 | -2.88842400 | -1.72023600 |
| N  | -4.24837100 | -2.08597900 | 3.60580300  | H | -1.55991900 | -7.00298900 | -1.20706300 |
| C  | -3.22273600 | -1.64864400 | 2.79450800  | H | -0.52684300 | -5.82187600 | 0.79970900  |
| O  | -2.26932500 | -2.48543600 | 2.62856800  | H | -3.86757300 | -4.13657800 | 3.70874700  |
| O  | -3.33694800 | -0.50143300 | 2.27301600  | H | -3.61492100 | -1.41011900 | -4.85072200 |
| C  | -0.57368300 | -5.30709800 | 3.96598200  | H | -4.87362000 | -1.84580200 | -3.67299100 |
| C  | 0.61986700  | -4.71181600 | 3.27832000  | H | -1.61463200 | 1.89691100  | -0.31513400 |
| N  | 0.56516400  | -3.75334600 | 2.26251200  | H | -0.97148000 | 3.22299200  | 0.65792200  |
| C  | 1.93308600  | -5.02644600 | 3.51767400  | H | -1.13815500 | 0.89731700  | 1.86179200  |
| C  | 1.82077300  | -3.52249200 | 1.90397600  | H | 0.43825200  | 1.71044500  | 1.96001100  |
| N  | 2.67792700  | -4.26910800 | 2.63717500  | H | -6.47784800 | 5.34395600  | 0.31345300  |
| C  | -2.84934600 | -5.36731100 | -3.20461000 | H | -1.18781200 | -5.90000000 | 3.27610000  |
| C  | -2.14545300 | -5.06785500 | -1.92981000 | H | -0.25211500 | -5.96305500 | 4.77960000  |
| N  | -1.57891200 | -6.00135900 | -1.07238000 | H | -5.08428900 | -3.52571200 | 4.85088300  |
| C  | -1.91760100 | -3.86179500 | -1.33518200 | H | -3.35373000 | -3.24786900 | 5.15266000  |
| C  | -1.04137600 | -5.33935300 | -0.01674300 | H | -8.31791900 | -1.33523400 | -2.75799300 |
| N  | -1.23456400 | -4.03641600 | -0.14874100 | H | -4.82763700 | -0.20185200 | -4.32425100 |
| C  | -4.20390600 | -1.04325600 | -4.00715000 | H | -3.77462400 | -5.93682900 | -3.04742700 |
| C  | -3.28884400 | -0.65345700 | -2.83907500 | H | -4.85673200 | -1.35672600 | 3.95098000  |
| O  | -3.78312600 | 0.14091100  | -1.95696500 | H | 1.57371000  | -0.54443100 | -0.87476100 |
| O  | -2.15330400 | -1.17297200 | -2.78031000 | H | 0.48661700  | 3.36530500  | -1.21731900 |
| Zn | -3.57704600 | -0.26760800 | 0.11470200  | O | -1.82401900 | -1.08290600 | -0.03344400 |
| Zn | -0.96885600 | -2.46857400 | 1.16661100  | H | -1.66825700 | -1.10638700 | -1.00512200 |
| N  | 0.98135300  | 0.22772600  | -0.53734200 | C | 0.09056100  | 7.86937000  | 4.28033000  |
| C  | 1.10809100  | 1.45975000  | -1.21726000 | C | -0.65039600 | 7.08726500  | 3.18827000  |
| O  | 1.89193800  | 1.55184100  | -2.16477200 | C | -0.94368600 | 5.62814900  | 3.59514200  |
| N  | 0.36412100  | 2.47120300  | -0.74139000 | C | -2.10030100 | 5.04845200  | 2.77362100  |
| C  | -0.72424100 | 2.26076600  | 0.20837300  | C | 0.30516100  | 4.73970900  | 3.48907000  |
| C  | -0.29058700 | 1.25562100  | 1.27392500  | C | -3.50488000 | 5.92229300  | -3.73369700 |
| C  | 0.39837000  | 0.06245900  | 0.67223300  | C | -2.75613600 | 4.97549800  | -2.79877900 |
| O  | 0.57042900  | -1.00808100 | 1.29990100  | S | -1.84944600 | 5.83262400  | -1.43061400 |
| H  | -8.49748200 | -3.05120100 | -2.37358200 | C | 3.80414500  | 4.65860200  | -2.54284500 |
| H  | -9.39193400 | -1.83750700 | -1.44746600 | C | 2.33211000  | 4.59571900  | -2.94877500 |
| H  | -5.91938600 | -0.37400900 | -1.81735300 | O | 1.43368800  | 4.84404900  | -2.13215000 |
| H  | -7.73155200 | -3.36386500 | 0.50928300  | C | 4.09929800  | 3.70148900  | -1.37057000 |

|   |             |             |             |   |            |             |             |
|---|-------------|-------------|-------------|---|------------|-------------|-------------|
| C | 5.46845300  | 3.83620200  | -0.71550700 | H | 4.64231000 | 0.74758800  | 7.41975200  |
| O | 6.16070300  | 2.85503900  | -0.43695700 | H | 3.10954900 | -0.58775100 | 5.85023000  |
| N | 5.88981300  | 5.09363300  | -0.41554600 | H | 6.32357900 | 1.83965800  | 4.36472800  |
| N | 2.06862900  | 4.30106900  | -4.23975400 | H | 2.17437400 | -0.75413500 | 3.55950000  |
| C | 0.70626500  | 4.14473300  | -4.73585600 | H | 5.39592400 | 1.65750600  | 2.05870400  |
| H | -1.59811100 | 7.59936500  | 2.97194000  | H | 2.66040500 | -0.41336700 | 1.33457500  |
| H | -0.07667900 | 7.09811000  | 2.25085400  | H | 5.49771300 | -1.55616400 | 6.83591300  |
| H | -1.26052400 | 5.63641800  | 4.64957000  | H | 6.97166800 | -0.83600500 | 6.17332700  |
| H | -3.02029700 | 5.62514500  | 2.94056100  | H | 6.62478300 | -0.70557600 | 7.90847900  |
| H | -2.29548000 | 4.00409600  | 3.04736400  | C | 2.86377200 | 0.66751800  | -5.18872300 |
| H | -1.88533800 | 5.08278000  | 1.69818700  | C | 3.77498300 | -0.37331400 | -4.56719400 |
| H | 0.10153500  | 3.72267500  | 3.84646700  | O | 4.53529500 | -1.05874400 | -5.24869200 |
| H | 0.64557200  | 4.67014400  | 2.44706400  | N | 3.63506200 | -0.50075300 | -3.22048900 |
| H | 1.13753700  | 5.13268600  | 4.08259300  | C | 4.49828300 | -1.35206900 | -2.42794300 |
| H | 1.05432000  | 7.41060000  | 4.52972200  | C | 3.62722700 | -2.42528600 | -1.76024200 |
| H | -3.44830600 | 4.28985200  | -2.30485100 | O | 2.77405500 | -2.08258200 | -0.90846600 |
| H | -2.03875100 | 4.35636800  | -3.34340200 | C | 5.25432600 | -0.53910100 | -1.35695700 |
| H | -0.61908600 | 5.81558700  | -1.98706800 | O | 5.96433900 | 0.48861500  | -2.00810000 |
| H | -4.22243300 | 6.53810300  | -3.18174100 | N | 3.77574600 | -3.72145400 | -2.09375300 |
| H | 4.01411300  | 2.66743600  | -1.70512700 | C | 4.69388700 | -4.32799400 | -3.10000200 |
| H | 3.33805600  | 3.85485700  | -0.59503300 | C | 4.14956400 | -4.21393200 | -4.53044500 |
| H | 5.29139500  | 5.90119100  | -0.49947500 | C | 4.77872200 | -5.78267700 | -2.59915200 |
| H | 6.75524400  | 5.19226000  | 0.09791400  | C | 3.36035300 | -6.06887500 | -2.07975000 |
| H | 4.46523000  | 4.43890600  | -3.38855700 | C | 2.94252000 | -4.74182800 | -1.42776400 |
| H | 0.12763800  | 5.04999200  | -4.53317500 | H | 1.88081500 | -4.50456100 | -1.54630400 |
| H | 0.21296600  | 3.28979400  | -4.26059000 | H | 3.15630400 | -4.73367000 | -0.35264000 |
| H | 2.83151000  | 4.01180300  | -4.83485000 | H | 2.69190100 | -6.31543700 | -2.91160300 |
| H | 3.98820100  | 5.70163400  | -2.25672900 | H | 3.32551700 | -6.90247900 | -1.37192500 |
| H | 0.74358600  | 3.98258200  | -5.81455000 | H | 5.09676400 | -6.46899500 | -3.38872700 |
| H | -2.81750300 | 6.60048400  | -4.24982700 | H | 5.50309600 | -5.85433500 | -1.77855600 |
| H | -4.05523900 | 5.35084200  | -4.49229500 | H | 5.67037700 | -3.84079600 | -3.03892900 |
| H | -0.50385100 | 7.91228300  | 5.20089400  | H | 3.14724100 | -4.65026800 | -4.60766300 |
| H | 0.29065400  | 8.90014600  | 3.96667700  | H | 4.11623800 | -3.17373900 | -4.86342200 |
| C | 6.17241800  | -0.69555000 | 6.90971400  | H | 4.81143000 | -4.75945500 | -5.21343900 |
| C | 5.41648400  | 0.61834500  | 6.65182400  | H | 5.21902000 | -1.78065100 | -3.12419100 |
| C | 4.79296700  | 0.62850300  | 5.27522800  | H | 6.07686800 | 1.23530800  | -1.38521800 |
| C | 3.61960200  | -0.09353200 | 5.02547400  | H | 5.92939600 | -1.22940800 | -0.81822400 |
| C | 5.41300900  | 1.26921600  | 4.19420900  | H | 4.53993800 | -0.14764600 | -0.62361900 |
| C | 3.09301300  | -0.20044700 | 3.74047000  | H | 3.05242600 | 0.17828700  | -2.73502300 |
| C | 4.90494700  | 1.17556700  | 2.89975300  | H | 2.10954500 | 0.15639800  | -5.79802300 |
| C | 3.75070500  | 0.42314200  | 2.67507400  | H | 2.35924200 | 1.29614100  | -4.45364400 |
| O | 3.28443100  | 0.32968700  | 1.38681400  | H | 3.46045500 | 1.28163500  | -5.87159600 |
| H | 6.10593100  | 1.46472500  | 6.75817600  |   |            |             |             |

### **SkDHPase.DHU-TS1-II**

|   |             |             |             |   |             |             |             |
|---|-------------|-------------|-------------|---|-------------|-------------|-------------|
| C | -8.17514900 | -2.93961500 | -1.41326500 | N | -4.94421800 | -2.01143300 | 0.15839800  |
| C | -6.91218100 | -2.75425400 | -0.65008100 | C | -5.94944200 | 4.49602000  | -0.09162700 |
| N | -6.40706600 | -3.64470600 | 0.28820200  | C | -5.33579400 | 3.22336200  | 0.39333900  |
| C | -5.98975700 | -1.75050100 | -0.70672300 | N | -5.07341800 | 2.98112000  | 1.73368900  |
| C | -5.22675500 | -3.15864900 | 0.75020700  | C | -4.87593700 | 2.10564100  | -0.25454400 |



|    |             |             |             |   |             |             |             |
|----|-------------|-------------|-------------|---|-------------|-------------|-------------|
| C  | -4.47108700 | 1.77519200  | 1.85130500  | H | 0.20652500  | -5.75893400 | 0.99814200  |
| N  | -4.33415400 | 1.21819600  | 0.65950700  | H | -3.24056300 | -4.35355300 | 4.02972700  |
| C  | -3.43020200 | -3.49648000 | 4.67925800  | H | -3.60791300 | -1.98211100 | -4.59871600 |
| N  | -3.73122000 | -2.32648600 | 3.88327700  | H | -4.78058500 | -2.42091500 | -3.33161800 |
| C  | -2.89845000 | -1.91143400 | 2.88080100  | H | -2.06584900 | 1.66964900  | -0.53932100 |
| O  | -1.97779500 | -2.74122700 | 2.55852100  | H | -1.51696500 | 3.10081400  | 0.33659400  |
| O  | -3.13640000 | -0.78851600 | 2.34099900  | H | -1.43431200 | 0.92424000  | 1.75519200  |
| C  | 0.28144000  | -5.14025300 | 4.14197700  | H | 0.11473000  | 1.77783200  | 1.61901100  |
| C  | 1.36595000  | -4.36589100 | 3.45162700  | H | -6.88763900 | 4.72107100  | 0.42980700  |
| N  | 1.15656200  | -3.47889800 | 2.39352600  | H | -0.20362600 | -5.85678400 | 3.46681900  |
| C  | 2.70811800  | -4.40677800 | 3.72768000  | H | 0.69590100  | -5.70119900 | 4.98405300  |
| C  | 2.35290200  | -3.01644500 | 2.04742900  | H | -4.29017300 | -3.72230900 | 5.31636600  |
| N  | 3.31426400  | -3.55384700 | 2.82766600  | H | -2.55094200 | -3.35614100 | 5.32245700  |
| C  | -2.35494900 | -5.72778700 | -2.87969700 | H | -8.32118800 | -2.08932000 | -2.08382700 |
| C  | -1.59827000 | -5.28657300 | -1.67775200 | H | -4.89325400 | -0.83687300 | -4.10455800 |
| N  | -0.92354600 | -6.12397400 | -0.79993100 | H | -3.21523200 | -6.35825200 | -2.62013800 |
| C  | -1.42367800 | -4.03087600 | -1.17081100 | H | -4.36358400 | -1.62867200 | 4.24648400  |
| C  | -0.38190700 | -5.36462500 | 0.18402600  | H | 1.42690200  | -0.47768700 | -0.92730000 |
| N  | -0.67415800 | -4.08861900 | -0.01298900 | H | -0.04132300 | 3.26281100  | -1.49713700 |
| C  | -4.19014600 | -1.60009200 | -3.75750800 | O | -1.50239700 | -1.03849900 | -0.01980600 |
| C  | -3.26833000 | -1.04839800 | -2.66770100 | H | -1.46344900 | -1.11347000 | -1.01150100 |
| O  | -3.79956600 | -0.26895400 | -1.79483800 | C | -0.40428700 | 8.03740800  | 3.94610400  |
| O  | -2.07598100 | -1.43027100 | -2.64779100 | C | -1.11759500 | 7.13970300  | 2.92696700  |
| Zn | -3.43141800 | -0.59186100 | 0.25372400  | C | -1.24018000 | 5.67164200  | 3.38542900  |
| Zn | -0.49076800 | -2.54767300 | 1.30563100  | C | -2.36595900 | 4.95575800  | 2.62847100  |
| N  | 0.70410500  | 0.21362600  | -0.68924700 | C | 0.08697100  | 4.91152400  | 3.24164400  |
| C  | 0.73543800  | 1.41282400  | -1.40285800 | C | -4.20140200 | 5.40575400  | -3.77395500 |
| O  | 1.57070400  | 1.58375400  | -2.30224400 | C | -3.23893200 | 4.71292800  | -2.81221000 |
| N  | -0.14882300 | 2.36083100  | -1.03669300 | S | -2.43831700 | 5.88551200  | -1.61837100 |
| C  | -1.19966900 | 2.13289700  | -0.05639500 | C | 3.14398100  | 4.29736100  | -2.64317900 |
| C  | -0.66004300 | 1.24000600  | 1.05553200  | C | 1.69370300  | 4.40698500  | -3.11512300 |
| C  | 0.02455600  | 0.01268800  | 0.49844600  | O | 0.78704200  | 4.81381000  | -2.37253200 |
| O  | 0.54662600  | -0.84708600 | 1.31537600  | C | 3.24267700  | 4.34708000  | -1.10981000 |
| H  | -8.15740200 | -3.84860200 | -2.02775300 | C | 4.68840900  | 4.38354700  | -0.63743200 |
| H  | -9.05339300 | -3.00091600 | -0.75823900 | O | 5.42333100  | 3.39390700  | -0.64096000 |
| H  | -5.97673200 | -0.87529200 | -1.33405000 | N | 5.14452900  | 5.59233900  | -0.21821000 |
| H  | -6.84174600 | -4.50837900 | 0.58267200  | N | 1.46281300  | 4.08580700  | -4.40776500 |
| H  | -4.62120500 | -3.65148000 | 1.49547600  | C | 0.11147700  | 4.02364600  | -4.95150500 |
| H  | -6.17406300 | 4.41912900  | -1.15835000 | H | -2.12317300 | 7.54543300  | 2.74892400  |
| H  | -5.27117500 | 5.34674100  | 0.04726600  | H | -0.60061400 | 7.17557200  | 1.95758500  |
| H  | -4.87720600 | 1.86873600  | -1.30724800 | H | -1.51067500 | 5.67824900  | 4.45285500  |
| H  | -5.24188800 | 3.62714200  | 2.49258000  | H | -3.33384800 | 5.43576600  | 2.82782600  |
| H  | -4.14779200 | 1.33155300  | 2.77966900  | H | -2.43735800 | 3.90206800  | 2.92707500  |
| H  | -0.50148300 | -4.47359400 | 4.51655600  | H | -2.20252000 | 4.99300200  | 1.54390700  |
| H  | 3.26731900  | -4.95334200 | 4.47134100  | H | 0.00623000  | 3.88912400  | 3.63070100  |
| H  | 4.29480300  | -3.31145600 | 2.79439100  | H | 0.38504000  | 4.84653700  | 2.18660100  |
| H  | 2.55164300  | -2.32576500 | 1.23995200  | H | 0.89998900  | 5.40384200  | 3.78610300  |
| H  | -2.72779000 | -4.84635600 | -3.40690300 | H | 0.61618100  | 7.69368500  | 4.15157300  |
| H  | -1.73056500 | -6.29491500 | -3.58142600 | H | -3.75954300 | 3.95818600  | -2.21678800 |
| H  | -1.75997000 | -3.10045500 | -1.60233900 | H | -2.44259400 | 4.19722100  | -3.35344300 |
| H  | -0.83327600 | -7.12742900 | -0.88252000 | H | -1.16941000 | 5.73375700  | -2.05597700 |

|   |             |             |             |   |            |             |             |
|---|-------------|-------------|-------------|---|------------|-------------|-------------|
| H | -4.99179200 | 5.93718700  | -3.23273500 | C | 2.58967100 | 0.76694800  | -5.40252100 |
| H | 2.78913200  | 3.44511800  | -0.69119200 | C | 3.58413100 | -0.17156800 | -4.74336600 |
| H | 2.67888400  | 5.20789100  | -0.73813400 | O | 4.44110800 | -0.76567700 | -5.39565600 |
| H | 4.55119800  | 6.40543900  | -0.15824700 | N | 3.41363000 | -0.30198900 | -3.40251800 |
| H | 6.10216500  | 5.66528200  | 0.09788400  | C | 4.35978300 | -1.00883400 | -2.56339100 |
| H | 3.59184800  | 3.36773900  | -3.01026200 | C | 3.62169800 | -2.17449100 | -1.89189200 |
| H | -0.41816100 | 4.95077400  | -4.72263500 | O | 2.72951000 | -1.93549700 | -1.04856200 |
| H | -0.44920500 | 3.17823800  | -4.53393700 | C | 4.95520000 | -0.06482000 | -1.49943300 |
| H | 2.19371800  | 3.60072100  | -4.90977100 | O | 5.57098600 | 1.01063600  | -2.16816500 |
| H | 3.70867800  | 5.12847600  | -3.08873700 | N | 3.92659600 | -3.44703600 | -2.21960700 |
| H | 0.17346400  | 3.90948200  | -6.03575600 | C | 4.93038200 | -3.94675200 | -3.20108200 |
| H | -3.67946100 | 6.13884700  | -4.39682300 | C | 4.40650100 | -3.92774000 | -4.64477700 |
| H | -4.67760400 | 4.66851700  | -4.43317400 | C | 5.19449400 | -5.36878500 | -2.66912800 |
| H | -0.94600500 | 8.05360100  | 4.89956700  | C | 3.81843600 | -5.82679600 | -2.15870700 |
| H | -0.33574100 | 9.07011600  | 3.58608900  | C | 3.21850100 | -4.55159100 | -1.54463000 |
| C | 6.66196800  | 0.24862900  | 6.52746900  | H | 2.13813500 | -4.45718900 | -1.69136300 |
| C | 5.68411400  | 1.42044900  | 6.34028700  | H | 3.40262400 | -4.48876600 | -0.46505500 |
| C | 4.89041100  | 1.28900100  | 5.06018400  | H | 3.20123900 | -6.17845400 | -2.99250000 |
| C | 3.71477900  | 0.53088900  | 5.01771600  | H | 3.88395500 | -6.64214800 | -1.43181000 |
| C | 5.34871100  | 1.85184600  | 3.86016200  | H | 5.60945200 | -6.02437700 | -3.43976500 |
| C | 3.02535600  | 0.32280700  | 3.82339100  | H | 5.91032900 | -5.32989400 | -1.83890900 |
| C | 4.67732500  | 1.65718900  | 2.65612800  | H | 5.83473800 | -3.33658100 | -3.13475700 |
| C | 3.51385900  | 0.88048800  | 2.63552100  | H | 3.47204300 | -4.49369100 | -4.73484400 |
| O | 2.88753200  | 0.69791800  | 1.43542300  | H | 4.24548700 | -2.90594200 | -4.99620300 |
| H | 6.24532300  | 2.36334000  | 6.33731300  | H | 5.14963500 | -4.39176200 | -5.30408700 |
| H | 5.00430800  | 1.46573400  | 7.20102100  | H | 5.15883300 | -1.34949300 | -3.22189300 |
| H | 3.32786600  | 0.09241300  | 5.93594700  | H | 5.51384100 | 1.80327200  | -1.59891000 |
| H | 6.25744300  | 2.45057800  | 3.86681400  | H | 5.67940000 | -0.64105200 | -0.89444100 |
| H | 2.10496900  | -0.25706700 | 3.80805100  | H | 4.16084800 | 0.26729300  | -0.81964100 |
| H | 5.03908900  | 2.09284900  | 1.72887700  | H | 2.74990700 | 0.31863200  | -2.93830100 |
| H | 2.15013700  | 0.06055600  | 1.53993000  | H | 2.06775800 | 0.22695400  | -6.19923200 |
| H | 6.12440000  | -0.70604900 | 6.56706900  | H | 1.86017900 | 1.17937800  | -4.70291000 |
| H | 7.37173200  | 0.19580900  | 5.69412100  | H | 3.15095900 | 1.57539600  | -5.88719000 |
| H | 7.23571700  | 0.35270700  | 7.45604100  |   |            |             |             |

### ***S*kDHPase.DHU-INT1-II**

|   |             |             |             |   |             |             |             |
|---|-------------|-------------|-------------|---|-------------|-------------|-------------|
| C | -7.16175200 | -4.86267300 | -1.45501300 | C | -2.25720100 | -2.66924200 | 2.76896100  |
| C | -5.95629500 | -4.39116800 | -0.72315200 | O | -1.20784300 | -3.29447500 | 2.38267200  |
| N | -5.16661800 | -5.17166200 | 0.11136000  | O | -2.75672300 | -1.62574300 | 2.24314600  |
| C | -5.35459900 | -3.16719300 | -0.72337200 | C | 1.61863700  | -4.93743700 | 4.03284700  |
| C | -4.14163200 | -4.40953500 | 0.57113800  | C | 2.50731900  | -3.88968300 | 3.43511700  |
| N | -4.22673700 | -3.18778300 | 0.07474900  | N | 2.11649400  | -3.08517200 | 2.36859500  |
| C | -6.89430000 | 2.86884400  | 0.00830600  | C | 3.78845900  | -3.55040200 | 3.78302200  |
| C | -5.98724300 | 1.78276300  | 0.47623600  | C | 3.14304200  | -2.29001900 | 2.08186300  |
| N | -5.65716000 | 1.59625600  | 1.81016100  | N | 4.17184600  | -2.54752100 | 2.91314200  |
| C | -5.27964700 | 0.82011600  | -0.19383600 | C | -0.83457600 | -6.04728600 | -2.99208200 |
| C | -4.77797200 | 0.57294400  | 1.90429200  | C | -0.19795400 | -5.47419700 | -1.77468500 |
| N | -4.52842000 | 0.08105100  | 0.70228800  | N | 0.69519100  | -6.15194900 | -0.95672700 |
| C | -2.38513200 | -4.30444000 | 4.61258500  | C | -0.33887700 | -4.24275400 | -1.19780300 |
| N | -2.93070700 | -3.22419900 | 3.81919900  | C | 1.05269900  | -5.33159400 | 0.06039800  |

|    |             |             |             |   |             |             |             |
|----|-------------|-------------|-------------|---|-------------|-------------|-------------|
| N  | 0.43504700  | -4.16672000 | -0.05655200 | H | -0.78428300 | 3.23524500  | -1.39754000 |
| C  | -3.66769100 | -2.50826500 | -3.78274800 | O | -1.21408300 | -1.14253200 | -0.18379300 |
| C  | -2.92340600 | -1.76838000 | -2.67658400 | H | -1.17801400 | -1.22198400 | -1.19257500 |
| O  | -3.63339900 | -1.16308600 | -1.79591100 | C | -2.40396800 | 7.63130700  | 4.10089400  |
| O  | -1.67049600 | -1.83993600 | -2.64991400 | C | -2.87273300 | 6.60048700  | 3.06601000  |
| Zn | -3.20529200 | -1.39320900 | 0.23763600  | C | -2.65994900 | 5.13954400  | 3.51270800  |
| Zn | 0.36171200  | -2.70685900 | 1.34569300  | C | -3.58115500 | 4.19365500  | 2.73147100  |
| N  | 0.52223000  | 0.33409900  | -0.81393300 | C | -1.19166400 | 4.70695100  | 3.38462800  |
| C  | 0.35495100  | 1.57614000  | -1.38080800 | C | -5.46398800 | 4.26229600  | -3.65984100 |
| O  | 1.15296200  | 2.01465700  | -2.23281200 | C | -4.32515600 | 3.89828000  | -2.71031700 |
| N  | -0.71298800 | 2.30989400  | -0.98235400 | S | -3.88785100 | 5.29126700  | -1.56613200 |
| C  | -1.66667800 | 1.87398100  | 0.02134200  | C | 1.92737900  | 5.02533000  | -2.55791300 |
| C  | -0.95669900 | 0.97788000  | 1.02814300  | C | 0.49362500  | 4.78686700  | -3.03309600 |
| C  | -0.20827300 | -0.16280700 | 0.33304500  | O | -0.48444800 | 4.96296400  | -2.29066800 |
| O  | 0.61960000  | -0.82985800 | 1.17492500  | C | 2.00853200  | 5.05370100  | -1.02276900 |
| H  | -6.93015600 | -5.67932800 | -2.15034100 | C | 3.39591600  | 5.43644900  | -0.53131400 |
| H  | -7.94842300 | -5.21864500 | -0.77793400 | O | 4.34908000  | 4.65474700  | -0.51978900 |
| H  | -5.62675600 | -2.28192400 | -1.27262800 | N | 3.54094200  | 6.72011900  | -0.10947100 |
| H  | -5.32483900 | -6.14303800 | 0.34188300  | N | 0.34672400  | 4.42784500  | -4.32865700 |
| H  | -3.37235900 | -4.76651600 | 1.23925700  | C | -0.95042200 | 4.04742000  | -4.87611500 |
| H  | -7.09660300 | 2.75052100  | -1.05906500 | H | -3.94184900 | 6.76446600  | 2.87177500  |
| H  | -6.44389200 | 3.85818100  | 0.15493900  | H | -2.36290400 | 6.76384500  | 2.10607100  |
| H  | -5.23488200 | 0.60821500  | -1.25083300 | H | -2.93997700 | 5.07195500  | 4.57561500  |
| H  | -5.96131900 | 2.17866400  | 2.57843600  | H | -4.63605600 | 4.43027400  | 2.92809200  |
| H  | -4.33786900 | 0.21636000  | 2.82224100  | H | -3.40403500 | 3.14729100  | 3.01131500  |
| H  | 0.63133600  | -4.52575000 | 4.26265500  | H | -3.42421500 | 4.28812300  | 1.64930800  |
| H  | 4.44310700  | -3.92468900 | 4.55469900  | H | -1.03979600 | 3.68847200  | 3.76207100  |
| H  | 5.03756100  | -2.02624400 | 2.94147500  | H | -0.87038700 | 4.72590700  | 2.33472100  |
| H  | 3.16594200  | -1.55251800 | 1.29009500  | H | -0.52265900 | 5.36680300  | 3.94756500  |
| H  | -1.43640700 | -5.27489400 | -3.47696300 | H | -1.33529400 | 7.53137900  | 4.32386100  |
| H  | -0.09367200 | -6.39676300 | -3.72169600 | H | -4.59280700 | 3.03338100  | -2.09644300 |
| H  | -0.91018300 | -3.40549500 | -1.56972300 | H | -3.42246900 | 3.63198600  | -3.26395800 |
| H  | 1.04173800  | -7.09035700 | -1.10252700 | H | -2.57634100 | 5.35842700  | -1.88423500 |
| H  | 1.74810800  | -5.60337100 | 0.83991400  | H | -6.36476200 | 4.55680300  | -3.10959600 |
| H  | -2.01470300 | -5.09701900 | 3.95919200  | H | 1.79126800  | 4.05364600  | -0.64044600 |
| H  | -3.00112000 | -2.72778700 | -4.61918800 | H | 1.24713500  | 5.73624800  | -0.63328300 |
| H  | -4.05145700 | -3.45121800 | -3.37391300 | H | 2.76893200  | 7.36720500  | -0.06484900 |
| H  | -2.50530000 | 1.34703100  | -0.45068800 | H | 4.44910700  | 7.02328700  | 0.21519800  |
| H  | -2.07634000 | 2.75835700  | 0.51602200  | H | 2.58959800  | 4.24411100  | -2.94513400 |
| H  | -1.64927400 | 0.54704800  | 1.75350400  | H | -1.68635600 | 4.81900400  | -4.64066100 |
| H  | -0.20788700 | 1.56238000  | 1.57210300  | H | -1.29224900 | 3.08918300  | -4.46568600 |
| H  | -7.85712800 | 2.85266300  | 0.53321000  | H | 1.17214400  | 4.12200700  | -4.82541300 |
| H  | 1.46613800  | -5.78238300 | 3.34880300  | H | 2.26757200  | 5.98272500  | -2.97751200 |
| H  | 2.05624300  | -5.33204700 | 4.95401500  | H | -0.86226800 | 3.96031800  | -5.96116200 |
| H  | -3.17656300 | -4.71352100 | 5.24678200  | H | -5.18584000 | 5.09991400  | -4.30674600 |
| H  | -1.55896000 | -3.97893100 | 5.25935200  | H | -5.72084400 | 3.40435800  | -4.29447800 |
| H  | -7.57644600 | -4.03768400 | -2.03925600 | H | -2.95089600 | 7.51524200  | 5.04444600  |
| H  | -4.52829000 | -1.92957300 | -4.13122100 | H | -2.57013700 | 8.65426400  | 3.74495500  |
| H  | -1.49172200 | -6.89411600 | -2.75608600 | C | 6.43331800  | 1.85476200  | 6.50804800  |
| H  | -3.69573300 | -2.67816000 | 4.18668600  | C | 5.03533000  | 2.48949600  | 6.40379600  |
| H  | 1.42340900  | -0.12003100 | -0.98565800 | C | 4.32125800  | 2.14044900  | 5.11486800  |

|   |            |             |             |   |            |             |             |
|---|------------|-------------|-------------|---|------------|-------------|-------------|
| C | 3.36819000 | 1.11805000  | 5.05916500  | N | 4.70163500 | -2.28323900 | -2.29625400 |
| C | 4.62059100 | 2.81339800  | 3.91916100  | C | 5.77920900 | -2.45734900 | -3.30815200 |
| C | 2.73906500 | 0.76633000  | 3.86193500  | C | 5.23125900 | -2.55060000 | -4.73900100 |
| C | 4.00903100 | 2.47867000  | 2.71566000  | C | 6.44706900 | -3.75877600 | -2.82329200 |
| C | 3.06280100 | 1.44405300  | 2.67908100  | C | 5.27061500 | -4.59628900 | -2.29543300 |
| O | 2.49919100 | 1.14915700  | 1.47593300  | C | 4.35340100 | -3.55381500 | -1.63546600 |
| H | 5.13284200 | 3.57983900  | 6.48907500  | H | 3.28650200 | -3.76663500 | -1.75662200 |
| H | 4.42835900 | 2.16744300  | 7.25955400  | H | 4.54139000 | -3.46263500 | -0.55796500 |
| H | 3.10163600 | 0.58682800  | 5.97138100  | H | 4.75395000 | -5.09073900 | -3.12539000 |
| H | 5.34963000 | 3.62150000  | 3.93185800  | H | 5.58333100 | -5.37471000 | -1.59259400 |
| H | 1.98415400 | -0.01651100 | 3.84403500  | H | 7.00685900 | -4.25512800 | -3.62097900 |
| H | 4.24119800 | 3.01162800  | 1.79757200  | H | 7.14706100 | -3.53746700 | -2.00829000 |
| H | 1.86519800 | 0.39237500  | 1.53543600  | H | 6.47784600 | -1.61938500 | -3.24157400 |
| H | 6.37031500 | 0.76078100  | 6.46885100  | H | 4.48540200 | -3.34942800 | -4.82564300 |
| H | 7.07548800 | 2.17971800  | 5.68152400  | H | 4.78817800 | -1.60407800 | -5.05672600 |
| H | 6.92489500 | 2.13263400  | 7.44767900  | H | 6.05357400 | -2.77746900 | -5.42813500 |
| C | 2.27233500 | 1.53903400  | -5.39839800 | H | 5.28461000 | 0.09544700  | -3.24442800 |
| C | 3.46287200 | 0.85147300  | -4.75051700 | H | 4.80046200 | 3.17990600  | -1.54298600 |
| O | 4.44838800 | 0.52041200  | -5.40907300 | H | 5.56899800 | 0.85682000  | -0.88807600 |
| N | 3.31620400 | 0.62361000  | -3.41958400 | H | 3.86073900 | 1.32490500  | -0.83027700 |
| C | 4.41946600 | 0.18388500  | -2.58707200 | H | 2.52226200 | 1.05890200  | -2.94191200 |
| C | 4.04710500 | -1.15640800 | -1.93732400 | H | 1.90383800 | 0.91451600  | -6.21877600 |
| O | 3.14230700 | -1.20110300 | -1.07867500 | H | 1.46063700 | 1.73681400  | -4.69504600 |
| C | 4.72588600 | 1.23103500  | -1.49822100 | H | 2.62324400 | 2.47563100  | -5.84898800 |
| O | 5.04241500 | 2.44416000  | -2.13994700 |   |            |             |             |

### ***SkDHPase.DHU-TS2-II***

|   |             |             |             |    |             |             |             |
|---|-------------|-------------|-------------|----|-------------|-------------|-------------|
| C | -6.20200200 | -5.73139500 | -1.81796500 | C  | 0.29696700  | -5.77988100 | -3.06701200 |
| C | -5.19666800 | -5.04982800 | -0.95747300 | C  | 0.68161100  | -5.20270900 | -1.75040300 |
| N | -4.53197500 | -5.65662100 | 0.09868200  | N  | 1.56971300  | -5.80838500 | -0.87261000 |
| C | -4.70280300 | -3.77616900 | -0.98998100 | C  | 0.29203100  | -4.05299200 | -1.11803700 |
| C | -3.68473200 | -4.75526300 | 0.65311800  | C  | 1.68437600  | -5.02673100 | 0.22844500  |
| N | -3.76055200 | -3.60364500 | 0.00674500  | N  | 0.91538900  | -3.95912000 | 0.10986500  |
| C | -7.27997400 | 1.83882400  | 0.05791900  | C  | -3.04227200 | -2.70581600 | -3.82594800 |
| C | -6.20623100 | 0.90943800  | 0.51101100  | C  | -2.44978300 | -1.78417000 | -2.76091300 |
| N | -5.88373200 | 0.73125300  | 1.84772600  | O  | -3.18561600 | -1.37569400 | -1.82722600 |
| C | -5.31886100 | 0.11600100  | -0.16712100 | O  | -1.20015600 | -1.53264200 | -2.90002300 |
| C | -4.83965500 | -0.12313700 | 1.93638100  | Zn | -2.90220700 | -1.76382800 | 0.35690400  |
| N | -4.47087400 | -0.51264600 | 0.72663900  | Zn | 0.56464700  | -2.45772500 | 1.45278000  |
| C | -1.86279400 | -4.77280700 | 4.52205400  | H  | -5.77462100 | -6.59047800 | -2.35010900 |
| N | -2.62661400 | -3.82748600 | 3.74146400  | H  | -7.06197600 | -6.09341400 | -1.24088500 |
| C | -1.98189800 | -2.90444400 | 2.94986300  | H  | -4.94449100 | -2.97026000 | -1.66223300 |
| O | -0.73379200 | -3.10455900 | 2.78913600  | H  | -4.66263700 | -6.60828300 | 0.41352100  |
| O | -2.69964600 | -1.99081600 | 2.43964800  | H  | -3.07485300 | -4.95401500 | 1.52170600  |
| C | 2.21264300  | -4.71230600 | 4.12952600  | H  | -7.45790000 | 1.71293700  | -1.01298200 |
| C | 2.90670000  | -3.50640600 | 3.56442600  | H  | -7.00423700 | 2.88662100  | 0.22932100  |
| N | 2.37759200  | -2.69830000 | 2.55839400  | H  | -5.20792600 | -0.03667200 | -1.22934500 |
| C | 4.13325900  | -3.00731400 | 3.92055100  | H  | -6.32242800 | 1.20165400  | 2.62736300  |
| C | 3.27397100  | -1.74843200 | 2.32220700  | H  | -4.37395400 | -0.44384100 | 2.85470100  |
| N | 4.34919600  | -1.90195900 | 3.12183000  | H  | 1.20147600  | -4.45778400 | 4.46137200  |

|   |             |             |             |   |             |             |             |
|---|-------------|-------------|-------------|---|-------------|-------------|-------------|
| H | 4.85081200  | -3.33457600 | 4.65710700  | H | 0.18060000  | 5.42442500  | -0.53363300 |
| H | 5.13412500  | -1.26698500 | 3.16928400  | H | 1.16240200  | 6.84084100  | -0.85931100 |
| H | 3.16631800  | -0.95477000 | 1.59719600  | H | 1.30721500  | 5.80449000  | 1.63903000  |
| H | -0.35206900 | -5.07708900 | -3.59543100 | H | 2.79697300  | 4.96106500  | 1.88064700  |
| H | 1.16852900  | -5.96707900 | -3.70637700 | H | 1.88295300  | 4.40315600  | -2.44441600 |
| H | -0.35848300 | -3.26910700 | -1.47254900 | H | -2.14734200 | 4.57779100  | -4.75496600 |
| H | 2.06465900  | -6.67507300 | -1.03280300 | H | -1.32351300 | 3.00046200  | -4.68329300 |
| H | 2.32939300  | -5.25197500 | 1.06368700  | H | 0.79097900  | 4.69536300  | -4.81116100 |
| H | -1.21496900 | -5.36181500 | 3.86923700  | H | 1.72641400  | 6.05041400  | -3.02827400 |
| H | -2.42173400 | -2.71576000 | -4.72399800 | H | -1.06629300 | 4.08521000  | -6.07589100 |
| H | -3.09651200 | -3.72285200 | -3.42036000 | H | -5.28937100 | 4.34708500  | -4.55146500 |
| H | -8.22882100 | 1.64995800  | 0.57445900  | H | -5.96098900 | 2.70631200  | -4.63623800 |
| H | 2.11753300  | -5.51814000 | 3.39037400  | H | -3.95467100 | 6.84724200  | 4.94382700  |
| H | 2.77334300  | -5.10734200 | 4.98114600  | H | -4.00979600 | 8.11507900  | 3.71023200  |
| H | -2.55273600 | -5.45178800 | 5.03231300  | C | 5.96292600  | 2.71988500  | 6.64526400  |
| H | -1.23016600 | -4.28919300 | 5.27859900  | C | 4.62221100  | 3.37777400  | 6.27029000  |
| H | -6.57842300 | -5.03093500 | -2.56751000 | C | 4.02922500  | 2.86549200  | 4.97218900  |
| H | -4.05932200 | -2.39204100 | -4.07622300 | C | 2.96564900  | 1.95554500  | 4.95808100  |
| H | -0.24552400 | -6.72818100 | -2.96104300 | C | 4.53887500  | 3.28009400  | 3.73019100  |
| H | -3.53704200 | -3.54330600 | 4.07495700  | C | 2.41716100  | 1.47783100  | 3.76402900  |
| C | -3.54668200 | 7.15779800  | 3.97448300  | C | 4.01341400  | 2.81376500  | 2.52670300  |
| C | -3.81403400 | 6.09303000  | 2.90297800  | C | 2.93485200  | 1.91048500  | 2.53509500  |
| C | -3.15735300 | 4.73378400  | 3.22785400  | O | 2.44902700  | 1.50493000  | 1.33532900  |
| C | -3.90520200 | 3.58437400  | 2.54229900  | H | 4.77036400  | 4.46379200  | 6.20113800  |
| C | -1.66440500 | 4.72006200  | 2.86291700  | H | 3.90422300  | 3.21877600  | 7.08471900  |
| C | -5.76129200 | 3.55191200  | -3.96504300 | H | 2.54355300  | 1.61614500  | 5.90232400  |
| C | -4.86841600 | 3.11259400  | -2.80767600 | H | 5.36934800  | 3.98345000  | 3.70253800  |
| S | -4.52169000 | 4.45011100  | -1.57762600 | H | 1.58049300  | 0.78331200  | 3.77810500  |
| C | 1.24428300  | 5.29385800  | -2.39892100 | H | 4.41951000  | 3.13279600  | 1.57000100  |
| C | -0.09925400 | 4.90438300  | -2.99893500 | H | 1.78428300  | 0.75919400  | 1.39385800  |
| O | -1.12757000 | 4.75415000  | -2.31935800 | H | 6.35253000  | 3.13112300  | 7.58341300  |
| C | 1.14537300  | 5.74728500  | -0.94248900 | H | 5.84705000  | 1.63693700  | 6.77124800  |
| C | 2.27169900  | 5.17831800  | -0.07880000 | H | 6.71567600  | 2.88551100  | 5.86604400  |
| O | 3.21873100  | 4.55176500  | -0.54659900 | N | 0.12985400  | 0.08018400  | -1.14829700 |
| N | 2.16749800  | 5.44553600  | 1.25049300  | C | -0.04113200 | 1.41670200  | -1.65038700 |
| N | -0.10003700 | 4.69099800  | -4.33317600 | O | 0.73982300  | 1.88780400  | -2.48190400 |
| C | -1.22366900 | 4.04681700  | -4.99597900 | N | -1.13191500 | 2.06146000  | -1.21221600 |
| H | -4.90037900 | 5.95689300  | 2.81131500  | C | -1.99361000 | 1.53062100  | -0.16385000 |
| H | -3.46869100 | 6.44173300  | 1.91978200  | C | -1.12508500 | 0.85733300  | 0.89200000  |
| H | -3.23614100 | 4.57785000  | 4.31485800  | C | -0.30670700 | -0.31548900 | 0.32364800  |
| H | -4.94329400 | 3.53595300  | 2.89749300  | O | 0.81169900  | -0.55191500 | 1.06830300  |
| H | -3.43094100 | 2.61673400  | 2.74934200  | H | -2.71169700 | 0.82943800  | -0.59677200 |
| H | -3.93805300 | 3.72529400  | 1.45473700  | H | -2.55894700 | 2.36470900  | 0.25384100  |
| H | -1.18359500 | 3.78280300  | 3.16759100  | H | -1.72000600 | 0.46436800  | 1.72159200  |
| H | -1.53271300 | 4.82855700  | 1.77741300  | H | -0.42959800 | 1.60047100  | 1.29564900  |
| H | -1.12617600 | 5.54072000  | 3.35221800  | H | 1.11701200  | -0.19909400 | -1.28508400 |
| H | -2.47414000 | 7.34080900  | 4.11105100  | H | -1.24768000 | 3.01695800  | -1.55219600 |
| H | -5.34451600 | 2.30918500  | -2.23890300 | O | -1.00570100 | -1.49807400 | 0.18601300  |
| H | -3.90917800 | 2.72384200  | -3.16094100 | H | -0.60841000 | -0.75771900 | -2.00377100 |
| H | -3.34443800 | 4.85888700  | -2.09946600 | C | 2.35268400  | 2.02418200  | -5.40172400 |
| H | -6.71999400 | 3.93474600  | -3.60086300 | C | 3.59249100  | 1.55260700  | -4.65577700 |

|   |            |             |             |   |            |             |             |
|---|------------|-------------|-------------|---|------------|-------------|-------------|
| O | 4.65784200 | 1.37830100  | -5.24620800 | H | 7.44238800 | -3.43773000 | -3.51440900 |
| N | 3.41136300 | 1.32622100  | -3.32549100 | H | 7.22173400 | -2.99248300 | -1.81536500 |
| C | 4.42461600 | 0.69478500  | -2.50068600 | H | 6.69823000 | -0.91351300 | -2.81488800 |
| C | 3.97658300 | -0.73473400 | -2.15936800 | H | 5.24279500 | -2.40075000 | -5.08202700 |
| O | 2.88919100 | -0.92743900 | -1.58387800 | H | 5.40368000 | -0.63250800 | -4.94397100 |
| C | 4.66767100 | 1.44276600  | -1.16844200 | H | 6.83612100 | -1.63226800 | -5.20604500 |
| O | 5.23838300 | 2.71570400  | -1.35946100 | H | 5.34531800 | 0.71603900  | -3.08121300 |
| N | 4.79874900 | -1.77100900 | -2.43572500 | H | 4.53072000 | 3.37799700  | -1.27620200 |
| C | 6.08378300 | -1.74089500 | -3.18192100 | H | 5.37668400 | 0.83790500  | -0.58142000 |
| C | 5.86815300 | -1.58867300 | -4.69185900 | H | 3.73444900 | 1.48953800  | -0.59904700 |
| C | 6.70948800 | -3.09146000 | -2.78024600 | H | 2.47310200 | 1.42013900  | -2.93760000 |
| C | 5.50008700 | -4.03107200 | -2.64008700 | H | 2.07576100 | 1.25410400  | -6.13016200 |
| C | 4.41418600 | -3.13235500 | -2.02796200 | H | 1.50139100 | 2.21678200  | -4.74577000 |
| H | 3.40229400 | -3.36154100 | -2.37537900 | H | 2.60963800 | 2.92274300  | -5.97335000 |
| H | 4.39748300 | -3.19073500 | -0.93125100 |   |            |             |             |
| H | 5.18518400 | -4.39406600 | -3.62471300 |   |            |             |             |
| H | 5.71247500 | -4.90705200 | -2.01909500 |   |            |             |             |

### **SkDHPase.DHU-EP-II**

|   |             |             |             |    |             |             |             |
|---|-------------|-------------|-------------|----|-------------|-------------|-------------|
| C | -7.81664600 | -3.77222600 | -2.12380200 | O  | -3.67623500 | -0.89010600 | -1.69133500 |
| C | -6.85220500 | -3.43678900 | -1.06288600 | O  | -2.06094600 | -1.77207100 | -2.99429300 |
| N | -6.54436300 | -4.22882200 | 0.03089100  | Zn | -3.67263600 | -1.18321700 | 0.21978200  |
| C | -6.02624000 | -2.36155800 | -0.96804500 | Zn | 0.22526900  | -3.31499800 | 0.69686600  |
| C | -5.55307500 | -3.62398300 | 0.72952900  | H  | -7.54436100 | -4.69446700 | -2.65325500 |
| N | -5.21543400 | -2.49031600 | 0.13835700  | H  | -8.83795900 | -3.90517500 | -1.74386600 |
| C | -6.78384100 | 3.39303300  | 0.97161100  | H  | -5.91237400 | -1.53516800 | -1.64933300 |
| C | -5.71275100 | 2.35654600  | 1.11656600  | H  | -6.97666400 | -5.11140500 | 0.26787800  |
| N | -4.58811400 | 2.51960300  | 1.90996500  | H  | -5.09018800 | -4.02986700 | 1.61698900  |
| C | -5.54734500 | 1.12531000  | 0.54007600  | H  | -7.54715500 | 3.04148100  | 0.27296200  |
| C | -3.78905500 | 1.44072900  | 1.76860000  | H  | -6.37071200 | 4.33023400  | 0.58263400  |
| N | -4.34819300 | 0.56370000  | 0.94908400  | H  | -6.20610200 | 0.61320800  | -0.14439200 |
| C | -2.90481900 | -4.99163600 | 3.73541900  | H  | -4.31453200 | 3.37284900  | 2.38101200  |
| N | -3.18138000 | -3.74840600 | 3.01012600  | H  | -2.83385500 | 1.32694900  | 2.25931200  |
| C | -2.32678600 | -3.22186900 | 2.06349300  | H  | 0.05887300  | -5.35261000 | 3.11190500  |
| O | -1.34195000 | -3.94676400 | 1.71863100  | H  | 3.84510000  | -5.24173900 | 3.91258700  |
| O | -2.59950300 | -2.06946200 | 1.59013900  | H  | 4.79375600  | -3.17129300 | 2.74779400  |
| C | 1.00922000  | -5.83879000 | 2.88127500  | H  | 3.20358300  | -2.23398000 | 0.99944600  |
| C | 2.07636400  | -4.82095800 | 2.60862400  | H  | -2.06904500 | -4.15518600 | -4.29159200 |
| N | 1.90154800  | -3.81289600 | 1.66913700  | H  | -1.05215100 | -5.42688800 | -4.99094800 |
| C | 3.32450800  | -4.67674100 | 3.15516600  | H  | -1.11016200 | -3.10987100 | -1.99536400 |
| C | 3.01090300  | -3.08353100 | 1.64519600  | H  | 0.02636700  | -7.06938300 | -2.80133000 |
| N | 3.89685300  | -3.58313500 | 2.52924000  | H  | 1.11932600  | -6.40246300 | -0.60562700 |
| C | -1.65962400 | -5.15363200 | -4.11925900 | H  | -2.63425400 | -5.77111900 | 3.02145900  |
| C | -0.85729600 | -5.11542500 | -2.86325200 | H  | -3.58496000 | -1.27010400 | -4.94662200 |
| N | -0.10016300 | -6.16716000 | -2.36333600 | H  | -4.76452700 | -2.19931000 | -3.99875200 |
| C | -0.69883500 | -4.10892200 | -1.95110900 | H  | -7.27633100 | 3.60903700  | 1.92732700  |
| C | 0.47124100  | -5.77435200 | -1.19847600 | H  | 0.84097000  | -6.48545500 | 2.01085400  |
| N | 0.12055200  | -4.52778500 | -0.92293100 | H  | 1.29637300  | -6.47899200 | 3.72030500  |
| C | -4.15347400 | -1.28759100 | -4.01531200 | H  | -3.81120400 | -5.29223100 | 4.26719200  |
| C | -3.19585800 | -1.31625400 | -2.82035800 | H  | -2.08948300 | -4.88224100 | 4.46140100  |

|   |             |             |             |   |             |             |             |
|---|-------------|-------------|-------------|---|-------------|-------------|-------------|
| H | -7.84363200 | -2.96610600 | -2.86112500 | C | 3.58837100  | -1.23274800 | 5.50185500  |
| H | -4.82795100 | -0.42727600 | -3.97307200 | C | 4.15160300  | 1.04832400  | 5.96036200  |
| H | -2.49150600 | -5.86696900 | -4.05660500 | C | 2.49422800  | -0.82241900 | 4.73990600  |
| H | -3.76237800 | -3.05910900 | 3.46937500  | C | 3.06317800  | 1.47890800  | 5.20633400  |
| C | -1.78773900 | 6.71728000  | 5.82771500  | C | 2.22351100  | 0.54588900  | 4.58279100  |
| C | -2.37091600 | 5.98531800  | 4.61220800  | O | 1.16597400  | 1.00806300  | 3.86685800  |
| C | -1.47376900 | 6.02605200  | 3.35822000  | H | 5.89653400  | -0.02699700 | 7.67774200  |
| C | -1.98001000 | 5.04682000  | 2.29080000  | H | 5.41607700  | -1.69999500 | 7.44853300  |
| C | -1.35064900 | 7.44052100  | 2.77181000  | H | 3.76974100  | -2.29962400 | 5.62940800  |
| C | -5.28981000 | 5.42391200  | -2.35798500 | H | 4.78949200  | 1.78956200  | 6.43814000  |
| C | -4.54780000 | 4.09089200  | -2.45036600 | H | 1.83594400  | -1.55306900 | 4.27799900  |
| S | -3.44702800 | 3.72377000  | -1.01716600 | H | 2.84399800  | 2.53641700  | 5.09112100  |
| C | 1.51983900  | 6.70941100  | -1.23038100 | H | 0.75696200  | 0.26401300  | 3.35887300  |
| C | 0.50187000  | 5.71538500  | -1.78843300 | H | 6.70051700  | -1.78354500 | 5.27930200  |
| O | -0.04357400 | 4.86607300  | -1.06739800 | H | 7.16847800  | -0.09179900 | 5.49123700  |
| C | 2.35712500  | 6.12658700  | -0.09213900 | H | 7.75410000  | -1.32243100 | 6.62915000  |
| C | 3.41364900  | 5.14490900  | -0.58584900 | C | 3.08414700  | 3.02428100  | -4.99767100 |
| O | 3.32277100  | 4.60169500  | -1.69520200 | C | 4.07032700  | 1.99143200  | -4.46186300 |
| N | 4.43308100  | 4.88790100  | 0.26364600  | O | 5.07352300  | 1.65118300  | -5.08243100 |
| N | 0.17808500  | 5.87891100  | -3.08645000 | N | 3.77923900  | 1.48579500  | -3.21187900 |
| C | -0.83925000 | 5.07696400  | -3.76152400 | C | 4.79552300  | 0.79462900  | -2.42587100 |
| H | -2.54257000 | 4.93395700  | 4.88639400  | C | 4.41877700  | -0.64381800 | -2.00448000 |
| H | -3.35741000 | 6.40505100  | 4.36281100  | O | 3.84992500  | -0.84370100 | -0.91599700 |
| H | -0.46859700 | 5.69500100  | 3.66174500  | C | 5.12984400  | 1.60136900  | -1.15334600 |
| H | -2.00052700 | 4.02086600  | 2.68470000  | O | 5.58268300  | 2.90938100  | -1.46626700 |
| H | -1.34423500 | 5.04338500  | 1.39805500  | N | 4.79776200  | -1.69152000 | -2.77740300 |
| H | -2.99328100 | 5.31762100  | 1.96061000  | C | 5.49519100  | -1.71172400 | -4.08551900 |
| H | -0.70252400 | 7.44179500  | 1.88727100  | C | 4.51501000  | -1.85427900 | -5.25734500 |
| H | -2.33286400 | 7.82166900  | 2.46213500  | C | 6.40429500  | -2.94291900 | -3.92157300 |
| H | -0.92974800 | 8.14987400  | 3.49195300  | C | 5.51519700  | -3.94207500 | -3.15592100 |
| H | -1.66500300 | 7.78958700  | 5.64094100  | C | 4.65131700  | -3.05442000 | -2.23424400 |
| H | -5.25639300 | 3.25659300  | -2.46989800 | O | -0.13838700 | 1.93004000  | -3.59314000 |
| H | -3.95779100 | 4.02260800  | -3.36874900 | C | 0.32067200  | 1.28303300  | -2.64431100 |
| H | -2.35588900 | 4.42875500  | -1.38438600 | N | 0.31739100  | -0.08389700 | -2.61786600 |
| H | -5.89682100 | 5.48041100  | -1.44877900 | C | 1.30604600  | 1.27637500  | -0.32949100 |
| H | 1.69076500  | 5.58985800  | 0.59455400  | C | 0.10430200  | 0.83516300  | 0.56827600  |
| H | 2.83449300  | 6.93089400  | 0.47963100  | C | 0.19844100  | -0.62026800 | 1.00593100  |
| H | 4.51495700  | 5.35340500  | 1.15465300  | O | 0.25498600  | -0.94910400 | 2.20633200  |
| H | 5.14372500  | 4.21566400  | -0.03161500 | O | 0.20916500  | -1.49176500 | 0.04408900  |
| H | 2.16609600  | 7.09025100  | -2.02807700 | H | 0.37945700  | -0.58300000 | -1.73446000 |
| H | -0.74990400 | 5.24893900  | -4.83677000 | H | 1.91759200  | 1.98803300  | 0.23143200  |
| H | -1.84495100 | 5.38304300  | -3.44774400 | H | 1.95199100  | 0.42139900  | -0.54436900 |
| H | 0.68686800  | 6.56579600  | -3.62354400 | H | 0.03624600  | 1.47081300  | 1.45424600  |
| H | -0.68920800 | 4.01205100  | -3.56409800 | H | -0.82248400 | 0.95010400  | -0.00664200 |
| H | -4.59232400 | 6.26834400  | -2.34467400 | H | 3.59786200  | -3.35700700 | -2.21236100 |
| H | -5.95564900 | 5.55033200  | -3.22141500 | H | 5.00531300  | -3.05379100 | -1.19776000 |
| H | -0.80530500 | 6.31010100  | 6.09590900  | H | 4.88418000  | -4.50349300 | -3.85248500 |
| H | -2.44001200 | 6.61112900  | 6.70182100  | H | 6.09772400  | -4.67295900 | -2.58711100 |
| C | 6.89299000  | -1.00586800 | 6.02913100  | H | 6.75629200  | -3.33198400 | -4.88151300 |
| C | 5.65287700  | -0.77245100 | 6.91042800  | H | 7.28313800  | -2.67713900 | -3.32236600 |
| C | 4.44263500  | -0.31373800 | 6.12406000  | H | 6.06331500  | -0.79051700 | -4.22095000 |

H 3.91501100 -2.76778200 -5.17860000  
H 3.83681600 -0.99790100 -5.29474600  
H 5.06979400 -1.88590200 -6.20151400  
H 5.68351000 0.78500800 -3.05942200  
H 4.82899800 3.38974000 -1.87602800  
H 5.94227800 1.10645700 -0.61186700  
H 4.25741200 1.62335900 -0.48844600  
H 2.93872800 1.80535000 -2.73248000

H 3.24515000 3.13620300 -6.07087600  
H 2.04505700 2.74063500 -4.79468100  
H 3.26955800 3.98327800 -4.49965600  
N 0.96208400 1.92640700 -1.58827700  
H 0.70362200 2.90916000 -1.52570800  
H -0.34304500 -0.50407600 -3.26071900  
H 0.94677500 7.56240600 -0.84259300

### SkDHPase.DHT-ES-II-L

C -2.73099300 -0.10103300 -4.80017700  
C -3.70403400 -0.13088400 -5.92124900  
N -4.02038600 0.94828500 -6.73390900  
C -4.44728400 -1.16455200 -6.40948100  
C -4.91976300 0.53663400 -7.66367100  
N -5.19111400 -0.74695200 -7.49602100  
C -9.56332500 -3.95540600 -4.12769300  
C -9.07345900 -3.27689800 -5.36646100  
N -9.86204500 -2.41425400 -6.11503300  
C -7.87802900 -3.31906500 -6.03777300  
C -9.14620600 -1.97928500 -7.17895000  
N -7.93752000 -2.51512600 -7.16164500  
C -6.95819100 2.60919600 -10.69330100  
N -7.29763000 1.54459800 -9.77188500  
C -7.26231300 0.22486000 -10.17077000  
O -6.73614900 0.02106900 -11.31887600  
O -7.70719200 -0.64294600 -9.36500100  
C -5.99742500 1.45357700 -14.50229300  
C -6.20842400 0.04709900 -14.98721600  
N -6.19282400 -1.09507100 -14.18078400  
C -6.41589300 -0.33588000 -16.28822000  
C -6.37007800 -2.12499300 -14.99650500  
N -6.51120600 -1.71169500 -16.27663200  
C -0.67058800 -2.26303000 -10.70606800  
C -1.89466200 -1.90752700 -11.47071200  
N -1.94438800 -1.07009000 -12.57683300  
C -3.18900800 -2.28029700 -11.25310000  
C -3.23695700 -0.96895800 -12.97618800  
N -4.01703200 -1.69114400 -12.18777200  
C -2.92952000 -4.25382000 -7.22607700  
C -4.19168100 -4.13774000 -8.09083700  
O -5.23910300 -3.65356000 -7.52402300  
O -4.11266700 -4.45886800 -9.29661300  
Zn -6.39020100 -2.13498300 -8.46467300  
Zn -6.06961100 -1.69958000 -11.97087400  
N -7.33904600 -5.20442900 -11.80156100  
C -7.77689200 -6.37436800 -11.14089100  
O -7.36847900 -7.47241700 -11.52358800  
N -8.65361200 -6.18149500 -10.14220500  
C -8.85791700 -4.86163300 -9.55160200

C -8.99736400 -3.80691500 -10.65591400  
C -7.90193400 -3.98415500 -11.68361600  
O -7.60235400 -3.08350000 -12.51015000  
H -1.71853000 0.15670100 -5.13669500  
H -3.01157100 0.61951000 -4.02123400  
H -4.49669700 -2.18810000 -6.07950300  
H -3.65116100 1.88531100 -6.64998800  
H -5.36377300 1.18129300 -8.40903000  
H -8.73765600 -4.48239700 -3.64260100  
H -10.34763300 -4.68850800 -4.34916300  
H -6.97602000 -3.86572900 -5.80977500  
H -10.82957500 -2.19032200 -5.92579800  
H -9.50119900 -1.28220700 -7.92208900  
H -6.68617800 1.69440100 -13.68677900  
H -6.50510600 0.24123200 -17.19580200  
H -6.71363700 -2.30840900 -17.06655100  
H -6.36269600 -3.16661900 -14.70834400  
H -0.93729500 -2.98243800 -9.92804600  
H 0.09871200 -2.72591700 -11.33720000  
H -3.55285900 -2.95754800 -10.49647000  
H -1.15704800 -0.61465300 -13.01770500  
H -3.56172300 -0.38615900 -13.82395400  
H -5.96782900 2.43021000 -11.11608200  
H -2.23125300 -4.97293000 -7.66019100  
H -2.44108300 -3.27189300 -7.18789200  
H -8.01877600 -4.61371100 -8.89276200  
H -9.76090200 -4.90471400 -8.93936800  
H -8.84709800 -2.81198000 -10.22816800  
H -9.96779000 -3.23712600 -3.40424100  
H -4.98074600 1.60450800 -14.11735900  
H -6.15588100 2.16129800 -15.32055700  
H -6.94229400 3.55796900 -10.14831600  
H -7.67080900 2.69879200 -11.52456700  
H -2.68313300 -1.08844800 -4.33439300  
H -3.17366900 -4.54315400 -6.19930800  
H -0.21588800 -1.39022100 -10.21965400  
H -7.93774000 1.74236900 -9.01529300  
H -6.66829600 -5.34676800 -12.57507800  
H -8.99128100 -7.02671500 -9.68258800  
O -6.06972300 -2.76638200 -10.26656900



|   |              |              |              |   |              |              |              |
|---|--------------|--------------|--------------|---|--------------|--------------|--------------|
| H | -5.43909600  | -3.51141400  | -10.13965700 | C | -10.14207300 | -2.97954600  | -15.03018100 |
| C | -15.72460400 | -5.23248300  | -8.59995300  | C | -10.65745600 | -5.24869300  | -15.71720500 |
| C | -14.28163800 | -5.20646500  | -8.07990300  | C | -9.81993500  | -4.34124600  | -15.06321600 |
| C | -14.08880500 | -4.24382400  | -6.88838700  | O | -8.69094600  | -4.82975700  | -14.47108400 |
| C | -12.77374800 | -4.52409800  | -6.15225500  | H | -13.96873000 | -3.66321600  | -17.45152600 |
| C | -14.16583000 | -2.76935100  | -7.31407900  | H | -13.75983000 | -2.06543100  | -16.74113200 |
| C | -8.21561900  | -7.89747600  | -4.42193300  | H | -11.52273400 | -1.46895400  | -15.67346100 |
| C | -8.24000400  | -7.19428000  | -5.77701800  | H | -12.42789100 | -5.47881600  | -16.90658000 |
| S | -9.90125200  | -7.18277200  | -6.59175000  | H | -9.49904800  | -2.28364300  | -14.49622100 |
| C | -9.17502300  | -10.10152300 | -11.70699100 | H | -10.40343300 | -6.30488700  | -15.70239200 |
| C | -8.85183600  | -9.75585200  | -10.25908800 | H | -8.22275200  | -4.10198200  | -14.02171400 |
| O | -9.52504900  | -8.96514700  | -9.58448100  | H | -11.92780600 | -1.55760400  | -18.40129800 |
| C | -10.57619300 | -9.66739000  | -12.13395100 | H | -12.13125400 | -3.16332800  | -19.11476100 |
| C | -10.65743600 | -9.43585300  | -13.64035000 | H | -13.43792300 | -1.96929300  | -19.23437100 |
| O | -9.72919400  | -8.94913300  | -14.28475900 | C | -10.37304600 | -3.86059200  | -11.35520200 |
| N | -11.83890300 | -9.76008800  | -14.22433000 | H | -11.16000900 | -3.65122300  | -10.62231300 |
| N | -7.74399000  | -10.35383900 | -9.75902500  | H | -10.44223500 | -3.11848200  | -12.15405900 |
| C | -7.14861800  | -9.92147600  | -8.50393300  | H | -10.56410100 | -4.84727100  | -11.78815400 |
| H | -13.99748700 | -6.21997500  | -7.76684200  | C | -4.78800700  | -9.59698500  | -11.86439800 |
| H | -13.59043200 | -4.92927700  | -8.88973800  | C | -4.67042500  | -9.13565800  | -13.30650800 |
| H | -14.90946900 | -4.43159400  | -6.17930300  | O | -3.83653600  | -9.62610000  | -14.06584400 |
| H | -12.72710600 | -5.55478000  | -5.78424300  | N | -5.52531600  | -8.13640200  | -13.65681500 |
| H | -12.66122300 | -3.85718700  | -5.28574200  | C | -5.48591300  | -7.49849600  | -14.95814700 |
| H | -11.91076100 | -4.38007000  | -6.81512700  | C | -4.95334200  | -6.06682300  | -14.79605500 |
| H | -14.06894200 | -2.10190000  | -6.44805000  | O | -5.56415200  | -5.25426300  | -14.06463800 |
| H | -13.35945800 | -2.52622400  | -8.02080100  | C | -6.88036900  | -7.45949900  | -15.62826900 |
| H | -15.11490000 | -2.52808000  | -7.80354400  | O | -7.34728400  | -8.76170700  | -15.89128800 |
| H | -16.04535400 | -4.25396300  | -8.97420800  | N | -3.84964700  | -5.68021300  | -15.46402300 |
| H | -7.96722200  | -6.14114200  | -5.67291500  | C | -2.96559800  | -6.50079000  | -16.33791900 |
| H | -7.52103600  | -7.63584700  | -6.47207900  | C | -2.02126900  | -7.39225700  | -15.52492800 |
| H | -9.74180600  | -8.27223400  | -7.37376700  | C | -2.22896800  | -5.41240300  | -17.14218500 |
| H | -8.93183200  | -7.44483700  | -3.72857200  | C | -2.04649500  | -4.27371700  | -16.12548500 |
| H | -10.80587100 | -8.71429100  | -11.64183300 | C | -3.35811900  | -4.29502600  | -15.32694800 |
| H | -11.33803400 | -10.38137400 | -11.80143800 | H | -3.24039200  | -4.03612300  | -14.27074000 |
| H | -12.60743700 | -10.16264500 | -13.71001200 | H | -4.09847200  | -3.60524000  | -15.74876700 |
| H | -11.95307500 | -9.59092400  | -15.21440200 | H | -1.19459700  | -4.48196300  | -15.46959700 |
| H | -8.44979000  | -9.56272700  | -12.32709600 | H | -1.86896600  | -3.30331900  | -16.59890100 |
| H | -7.87549200  | -10.01435000 | -7.69279600  | H | -1.28558100  | -5.77900900  | -17.55602900 |
| H | -6.80954300  | -8.88012300  | -8.56113000  | H | -2.85486200  | -5.07523200  | -17.97764100 |
| H | -7.16618700  | -10.88466700 | -10.39617800 | H | -3.58063000  | -7.11843700  | -16.99831100 |
| H | -9.02037000  | -11.17320600 | -11.88245500 | H | -1.40854700  | -6.79578200  | -14.83878300 |
| H | -6.29352800  | -10.56300000 | -8.28138000  | H | -2.56585900  | -8.14447500  | -14.94968700 |
| H | -8.47256700  | -8.95760300  | -4.51699400  | H | -1.34498000  | -7.92151900  | -16.20715000 |
| H | -7.21497800  | -7.82826600  | -3.97593300  | H | -4.82829900  | -8.11156800  | -15.57287000 |
| H | -16.42025400 | -5.52974300  | -7.80612500  | H | -8.09090500  | -8.93939100  | -15.28991400 |
| H | -15.83656300 | -5.94782700  | -9.42267300  | H | -6.77932200  | -6.91496800  | -16.58050200 |
| C | -12.65108500 | -2.36154800  | -18.57849700 | H | -7.57245400  | -6.88714500  | -15.00280500 |
| C | -13.22835700 | -2.87877400  | -17.25230300 | H | -6.19050400  | -7.79452400  | -12.96499400 |
| C | -12.11515200 | -3.41330800  | -16.38630300 | H | -3.85478300  | -9.34955300  | -11.34661500 |
| C | -11.28431000 | -2.53077900  | -15.68743000 | H | -5.62181500  | -9.13863100  | -11.32950500 |
| C | -11.78975800 | -4.77585900  | -16.37491500 | H | -4.87718400  | -10.68891800 | -11.85336800 |

**SkDHPase.DHT-TS1-II-L**

|    |              |             |              |   |              |              |              |
|----|--------------|-------------|--------------|---|--------------|--------------|--------------|
| C  | -2.73099100  | -0.10103300 | -4.80017600  | H | -0.92218100  | -2.96331000  | -9.90590100  |
| C  | -3.56411000  | -0.18860600 | -6.02902300  | H | 0.09973800   | -2.73410400  | -11.32944200 |
| N  | -3.56387900  | 0.73659000  | -7.06466700  | H | -3.56248100  | -2.99952700  | -10.49893200 |
| C  | -4.44539800  | -1.15163600 | -6.42524700  | H | -1.16531600  | -0.68214700  | -13.04712100 |
| C  | -4.42239000  | 0.30717800  | -8.02470700  | H | -3.56883100  | -0.47318100  | -13.86323900 |
| N  | -4.96830700  | -0.84158900 | -7.66621200  | H | -5.92987300  | 2.49278500   | -11.04166000 |
| C  | -9.56332900  | -3.95540700 | -4.12770900  | H | -2.21097600  | -4.93052600  | -7.69331400  |
| C  | -9.03331000  | -3.21961400 | -5.31205100  | H | -2.47975600  | -3.25632200  | -7.14610600  |
| N  | -9.77623300  | -2.27909100 | -6.01081400  | H | -9.94023900  | -3.27136200  | -3.35764500  |
| C  | -7.83643100  | -3.27798600 | -5.97707900  | H | -4.95471500  | 1.54876200   | -14.17354900 |
| C  | -9.03540600  | -1.81793100 | -7.04473500  | H | -6.16204100  | 2.17422000   | -15.30791500 |
| N  | -7.85211600  | -2.40929800 | -7.05349000  | H | -7.04831200  | 3.57072600   | -10.17971200 |
| C  | -6.95819100  | 2.60919900  | -10.69330100 | H | -7.61561500  | 2.62469400   | -11.57324200 |
| N  | -7.29151200  | 1.54965600  | -9.76672100  | H | -2.93012900  | -0.96787600  | -4.16543100  |
| C  | -7.09745700  | 0.23376700  | -10.08309400 | H | -3.15748100  | -4.59245000  | -6.21086800  |
| O  | -6.40397400  | 0.02044800  | -11.13889300 | H | -0.22447900  | -1.37060500  | -10.24844100 |
| O  | -7.56797900  | -0.63940000 | -9.29322200  | H | -7.94778000  | 1.72980000   | -9.02131000  |
| C  | -5.99742500  | 1.45357800  | -14.50229300 | C | -15.72461200 | -5.23246300  | -8.59997700  |
| C  | -6.31090100  | 0.06475600  | -14.97952900 | C | -14.28162700 | -5.20649100  | -8.07986800  |
| N  | -6.28365800  | -1.07925700 | -14.17781000 | C | -14.05131000 | -4.11429800  | -7.01264300  |
| C  | -6.65248200  | -0.30487100 | -16.25487900 | C | -12.74244800 | -4.34566500  | -6.24866600  |
| C  | -6.59093600  | -2.10041500 | -14.97009600 | C | -14.08444100 | -2.69910900  | -7.61051800  |
| N  | -6.81949100  | -1.67424500 | -16.23001100 | C | -8.21561800  | -7.89747700  | -4.42193400  |
| C  | -0.67058800  | -2.26303000 | -10.70606800 | C | -8.41101500  | -7.25320600  | -5.79195400  |
| C  | -1.90316900  | -1.94243400 | -11.47489200 | S | -10.15243600 | -7.38494300  | -6.41483900  |
| N  | -1.95375900  | -1.12596600 | -12.59632900 | C | -9.22881100  | -9.83381000  | -11.67990300 |
| C  | -3.19732700  | -2.32227000 | -11.25690000 | C | -8.86456600  | -9.58827600  | -10.22256200 |
| C  | -3.24342900  | -1.03892300 | -13.00401600 | O | -9.49530800  | -8.80400400  | -9.49822500  |
| N  | -4.02249900  | -1.75171300 | -12.20583700 | C | -10.65411300 | -9.40351800  | -12.01881000 |
| C  | -2.92952000  | -4.25382000 | -7.22607700  | C | -10.81868700 | -9.08006100  | -13.50079500 |
| C  | -4.20129700  | -4.14706800 | -8.07149000  | O | -9.90814400  | -8.62387000  | -14.19067400 |
| O  | -5.24613100  | -3.67057700 | -7.49482900  | N | -12.06013800 | -9.28843400  | -14.00950700 |
| O  | -4.14137900  | -4.46654000 | -9.28095200  | N | -7.77946200  | -10.25894300 | -9.77165300  |
| Zn | -6.36660000  | -2.16202400 | -8.45074800  | C | -7.14862000  | -9.92147200  | -8.50393000  |
| Zn | -6.05362900  | -1.65762800 | -12.08052000 | H | -14.04114400 | -6.18508900  | -7.64369400  |
| H  | -1.65750200  | -0.09495600 | -5.02772200  | H | -13.57861900 | -5.05888100  | -8.91284300  |
| H  | -2.94878500  | 0.79899200  | -4.21139300  | H | -14.87438900 | -4.19071800  | -6.28570600  |
| H  | -4.71520200  | -2.06863300 | -5.92955100  | H | -12.72286200 | -5.33140300  | -5.77143000  |
| H  | -3.02068800  | 1.58815000  | -7.10141900  | H | -12.61491200 | -3.59117500  | -5.45873100  |
| H  | -4.61848600  | 0.84077800  | -8.94221800  | H | -11.87558400 | -4.29557600  | -6.92012700  |
| H  | -8.76814700  | -4.55454700 | -3.67679700  | H | -13.96496500 | -1.93682500  | -6.82970100  |
| H  | -10.37900500 | -4.63310700 | -4.40513700  | H | -13.27290100 | -2.56528300  | -8.33954100  |
| H  | -6.96763300  | -3.88690500 | -5.78049200  | H | -15.02750100 | -2.48929700  | -8.12523200  |
| H  | -10.73572500 | -2.02690500 | -5.81588300  | H | -15.99967400 | -4.29721600  | -9.09994300  |
| H  | -9.36003400  | -1.07658500 | -7.75778400  | H | -8.16886600  | -6.18747800  | -5.75936600  |
| H  | -6.62716700  | 1.73060100  | -13.65107700 | H | -7.75306000  | -7.70401100  | -6.53855600  |
| H  | -6.79010900  | 0.27699500  | -17.15320100 | H | -9.91128200  | -8.21567200  | -7.45321300  |
| H  | -7.13090500  | -2.25775700 | -16.99423300 | H | -8.88350700  | -7.45446400  | -3.67528400  |
| H  | -6.63864500  | -3.13880100 | -14.67401500 | H | -10.88027100 | -8.48983700  | -11.45468000 |

|   |              |              |              |   |              |              |              |
|---|--------------|--------------|--------------|---|--------------|--------------|--------------|
| H | -11.38713000 | -10.15391100 | -11.7008340  | H | -8.72670800  | -2.73868200  | -9.84322300  |
| H | -12.82490700 | -9.63444300  | -13.45026900 | H | -6.53257500  | -5.17690400  | -12.39335600 |
| H | -12.23990600 | -9.02800700  | -14.96941000 | H | -8.75521200  | -6.95906000  | -9.50949200  |
| H | -8.53628200  | -9.22919600  | -12.27668600 | O | -6.20672100  | -3.00117100  | -10.26108000 |
| H | -7.88668100  | -9.96905900  | -7.69986600  | H | -5.53129100  | -3.71216500  | -10.08478300 |
| H | -6.71181000  | -8.91567900  | -8.53081800  | C | -10.08960400 | -3.86319500  | -11.07162100 |
| H | -7.22812700  | -10.76734300 | -10.44952400 | H | -10.92245300 | -3.79988200  | -10.36185300 |
| H | -9.05596800  | -10.88352600 | -11.94605700 | H | -10.20716100 | -3.06230300  | -11.80495100 |
| H | -6.35958500  | -10.64799400 | -8.29897000  | H | -10.16318200 | -4.81933700  | -11.59718700 |
| H | -8.42580900  | -8.97109800  | -4.45524800  | C | -4.82810800  | -9.59760900  | -11.88554500 |
| H | -7.18210200  | -7.75878200  | -4.07886700  | C | -4.72146400  | -9.07768400  | -13.31107900 |
| H | -16.43276000 | -5.39183900  | -7.77796600  | O | -3.95437300  | -9.59525600  | -14.12228600 |
| H | -15.87068100 | -6.04266600  | -9.32347400  | N | -5.51040500  | -8.00449300  | -13.58307300 |
| C | -12.65108600 | -2.36154800  | -18.57849800 | C | -5.51331100  | -7.33667500  | -14.86964500 |
| C | -13.20937100 | -2.81426100  | -17.22029700 | C | -4.90697000  | -5.93500800  | -14.70821600 |
| C | -12.10252300 | -3.29410500  | -16.31157800 | O | -5.45579600  | -5.10221500  | -13.95449300 |
| C | -11.36760100 | -2.38880800  | -15.53878600 | C | -6.94154700  | -7.20837000  | -15.44979900 |
| C | -11.71116500 | -4.64050000  | -16.29342300 | O | -7.48430600  | -8.47917600  | -15.72106100 |
| C | -10.26504900 | -2.79933400  | -14.79042000 | N | -3.80273900  | -5.59512400  | -15.40388000 |
| C | -10.61898300 | -5.07459800  | -15.54839900 | C | -2.98728000  | -6.44386800  | -16.31508800 |
| C | -9.88270700  | -4.14680300  | -14.80219300 | C | -2.06137000  | -7.39288100  | -15.54607700 |
| O | -8.80206400  | -4.60508100  | -14.11084800 | C | -2.22919800  | -5.37966200  | -17.13257500 |
| H | -13.94365600 | -3.61462900  | -17.37625300 | C | -1.96861600  | -4.25720600  | -16.11480900 |
| H | -13.74957500 | -1.98106500  | -16.75249300 | C | -3.25178500  | -4.23379900  | -15.27029900 |
| H | -11.65572300 | -1.33912500  | -15.52683900 | H | -3.08358400  | -3.99457700  | -14.21620000 |
| H | -12.27296300 | -5.36390800  | -16.88143200 | H | -3.98198300  | -3.50906500  | -15.65233600 |
| H | -9.70244900  | -2.08373500  | -14.19518400 | H | -1.10399800  | -4.50486400  | -15.48960300 |
| H | -10.32695000 | -6.12073000  | -15.52168800 | H | -1.76772500  | -3.29112000  | -16.58811000 |
| H | -8.41922000  | -3.89288700  | -13.55258300 | H | -1.31463300  | -5.78089100  | -17.57802700 |
| H | -11.93669400 | -1.53976000  | -18.45197000 | H | -2.86560100  | -5.00952400  | -17.94577500 |
| H | -12.12589600 | -3.18370600  | -19.07774600 | H | -3.65194400  | -7.02281900  | -16.96227100 |
| H | -13.45023400 | -2.01529000  | -19.24492900 | H | -1.40187700  | -6.83745400  | -14.86861700 |
| N | -7.11292900  | -5.05981300  | -11.55220400 | H | -2.62506100  | -8.12970200  | -14.96885300 |
| C | -7.54571200  | -6.23539900  | -10.94163700 | H | -1.43086700  | -7.94083200  | -16.25684200 |
| O | -7.21405500  | -7.33707000  | -11.40121000 | H | -4.92528100  | -7.96341400  | -15.53897600 |
| N | -8.35236900  | -6.09722100  | -9.87148000  | H | -8.23681000  | -8.62217200  | -15.12159100 |
| C | -8.59669200  | -4.80983600  | -9.23861300  | H | -6.87129400  | -6.63549300  | -16.38911900 |
| C | -8.75788800  | -3.72462400  | -10.30917800 | H | -7.56437000  | -6.62513200  | -14.76365100 |
| C | -7.58368500  | -3.78425800  | -11.28332000 | H | -6.12403300  | -7.64777300  | -12.84914900 |
| O | -7.54614400  | -2.94859400  | -12.28339000 | H | -3.84615200  | -9.50460300  | -11.40927300 |
| H | -7.77067800  | -4.56679500  | -8.56225700  | H | -5.57010300  | -9.06528600  | -11.28771800 |
| H | -9.50416900  | -4.89524100  | -8.63503100  | H | -5.06031000  | -10.66822800 | -11.92358900 |

**SkDHPase.DHT-INT1-II-L**

|   |             |             |             |   |             |             |             |
|---|-------------|-------------|-------------|---|-------------|-------------|-------------|
| C | -2.73099300 | -0.10103300 | -4.80017700 | C | -9.56332600 | -3.95540800 | -4.12769600 |
| C | -3.53622200 | -0.20013100 | -6.04571300 | C | -9.03256400 | -3.20358600 | -5.29915500 |
| N | -3.47698400 | 0.68311900  | -7.11580200 | N | -9.78047300 | -2.27450700 | -6.00746900 |
| C | -4.44391500 | -1.14396300 | -6.42585000 | C | -7.82560100 | -3.24243800 | -5.94503600 |
| C | -4.32909400 | 0.24930000  | -8.07950300 | C | -9.03327800 | -1.80141000 | -7.03043900 |
| N | -4.92606100 | -0.86354700 | -7.68996400 | N | -7.84042200 | -2.37330900 | -7.02033200 |

|    |              |             |              |   |              |              |              |
|----|--------------|-------------|--------------|---|--------------|--------------|--------------|
| C  | -6.95819100  | 2.60919600  | -10.69330100 | H | -3.15749600  | -4.61071300  | -6.21728900  |
| N  | -7.27189500  | 1.51228700  | -9.80364300  | H | -0.21238700  | -1.37081500  | -10.26051400 |
| C  | -7.00949200  | 0.21010400  | -10.12071300 | H | -7.93857500  | 1.65443000   | -9.05929300  |
| O  | -6.27028900  | 0.01945300  | -11.14909900 | C | -15.72460900 | -5.23248200  | -8.59995500  |
| O  | -7.47270600  | -0.68162600 | -9.34334100  | C | -14.28163200 | -5.20646700  | -8.07990100  |
| C  | -5.99742500  | 1.45357800  | -14.50229300 | C | -14.03978000 | -4.07930100  | -7.05175900  |
| C  | -6.34141100  | 0.09831100  | -15.04227700 | C | -12.74811900 | -4.31136400  | -6.25912300  |
| N  | -6.29463100  | -1.06861300 | -14.28094900 | C | -14.02994900 | -2.68888500  | -7.70593500  |
| C  | -6.72747300  | -0.23270500 | -16.31448400 | C | -8.21561800  | -7.89747700  | -4.42193300  |
| C  | -6.63612500  | -2.07055700 | -15.08628600 | C | -8.44270700  | -7.25567100  | -5.78810700  |
| N  | -6.90072000  | -1.60293900 | -16.32197000 | S | -10.19768300 | -7.39752900  | -6.36787800  |
| C  | -0.67058800  | -2.26303000 | -10.70606800 | C | -9.29632700  | -9.76265500  | -11.66073800 |
| C  | -1.89428000  | -1.93270000 | -11.48894500 | C | -8.86218300  | -9.52042700  | -10.21551700 |
| N  | -1.90767200  | -1.13524700 | -12.62476900 | O | -9.52656500  | -8.81790900  | -9.43949900  |
| C  | -3.20170100  | -2.28241400 | -11.28943200 | C | -10.28010000 | -8.68109300  | -12.13435000 |
| C  | -3.18601200  | -1.02935700 | -13.05982500 | C | -10.78796100 | -8.94937800  | -13.54249100 |
| N  | -3.99612800  | -1.71087900 | -12.26505000 | O | -10.11115900 | -8.74995300  | -14.55226700 |
| C  | -2.92951900  | -4.25382000 | -7.22607700  | N | -12.04963600 | -9.44676100  | -13.63304500 |
| C  | -4.19975400  | -4.13885100 | -8.06491500  | N | -7.74141100  | -10.16246500 | -9.81381300  |
| O  | -5.24110300  | -3.65978100 | -7.48706100  | C | -7.14862100  | -9.92147200  | -8.50393100  |
| O  | -4.14721800  | -4.45687400 | -9.27753600  | H | -14.05440000 | -6.17209800  | -7.60911400  |
| Zn | -6.37009500  | -2.16152900 | -8.41308600  | H | -13.57595200 | -5.09701500  | -8.91618400  |
| Zn | -6.02373200  | -1.57515500 | -12.28221000 | H | -14.87464500 | -4.10743700  | -6.33496300  |
| H  | -1.65285200  | -0.14432900 | -4.99981500  | H | -12.76034500 | -5.27682900  | -5.74189600  |
| H  | -2.92731300  | 0.82699800  | -4.24856400  | H | -12.61456900 | -3.52890200  | -5.49733400  |
| H  | -4.75676500  | -2.02901700 | -5.89872100  | H | -11.87056600 | -4.31102300  | -6.91827800  |
| H  | -2.90040400  | 1.51144600  | -7.17204900  | H | -13.90563700 | -1.89818100  | -6.95448800  |
| H  | -4.48133300  | 0.74968500  | -9.02386100  | H | -13.20415200 | -2.60377700  | -8.42611400  |
| H  | -8.76395800  | -4.54638200 | -3.67358400  | H | -14.95949100 | -2.47911300  | -8.24474000  |
| H  | -10.36520200 | -4.64306000 | -4.42045800  | H | -15.98986600 | -4.30875700  | -9.12614600  |
| H  | -6.95357300  | -3.84290700 | -5.73757500  | H | -8.19877700  | -6.18989900  | -5.76197400  |
| H  | -10.74941000 | -2.04500100 | -5.83102200  | H | -7.80298400  | -7.70861400  | -6.54888700  |
| H  | -9.36398800  | -1.07199900 | -7.75323300  | H | -9.96526100  | -8.18304800  | -7.44288000  |
| H  | -6.55376900  | 1.66231700  | -13.58344100 | H | -8.86739700  | -7.45489000  | -3.66070300  |
| H  | -6.89086800  | 0.37376100  | -17.19179100 | H | -9.75548700  | -7.72318300  | -12.15411800 |
| H  | -7.24936900  | -2.16128800 | -17.08919600 | H | -11.10405300 | -8.60188100  | -11.41907600 |
| H  | -6.68942500  | -3.11575600 | -14.81050300 | H | -12.64071200 | -9.57751200  | -12.82670000 |
| H  | -0.93694200  | -2.94742700 | -9.89699300  | H | -12.42589400 | -9.64762700  | -14.54965200 |
| H  | 0.09321400   | -2.75637700 | -11.31976300 | H | -8.42304100  | -9.77911500  | -12.32072300 |
| H  | -3.59667700  | -2.94410600 | -10.53260400 | H | -7.91034700  | -10.03733100 | -7.72995000  |
| H  | -1.10068800  | -0.71950400 | -13.06959000 | H | -6.72153600  | -8.91306000  | -8.43781900  |
| H  | -3.48132800  | -0.47196400 | -13.93559600 | H | -7.15068000  | -10.56560500 | -10.52785500 |
| H  | -5.93005300  | 2.51746700  | -11.04920300 | H | -9.76412100  | -10.75604200 | -11.71205300 |
| H  | -2.20825100  | -4.91965700 | -7.70416900  | H | -6.35794000  | -10.65565700 | -8.33536200  |
| H  | -2.48547900  | -3.25555300 | -7.12759300  | H | -8.42525600  | -8.97129200  | -4.44966700  |
| H  | -9.95944600  | -3.28407600 | -3.35611800  | H | -7.17505100  | -7.75693100  | -4.10139700  |
| H  | -4.93033700  | 1.53865000  | -14.25954700 | H | -16.43463400 | -5.36141400  | -7.77428300  |
| H  | -6.23380200  | 2.22774400  | -15.23740400 | H | -15.87883400 | -6.06103300  | -9.30059000  |
| H  | -7.05781600  | 3.55048300  | -10.14553300 | C | -12.65108500 | -2.36154800  | -18.57849700 |
| H  | -7.62140000  | 2.64786600  | -11.56838100 | C | -13.09939600 | -2.60187000  | -17.12722500 |
| H  | -2.97967300  | -0.93639500 | -4.14121200  | C | -11.96237200 | -3.07639400  | -16.25015100 |

|   |              |             |              |   |             |              |              |
|---|--------------|-------------|--------------|---|-------------|--------------|--------------|
| C | -11.22000500 | -2.18406100 | -15.47027300 | H | -9.94559600 | -4.75168200  | -11.67700800 |
| C | -11.57720900 | -4.42614200 | -16.24045000 | C | -4.82810800 | -9.59760800  | -11.88554600 |
| C | -10.12198600 | -2.60875500 | -14.71858000 | C | -4.67662300 | -9.04282100  | -13.29184300 |
| C | -10.49015800 | -4.87174700 | -15.49665400 | O | -3.93975100 | -9.58392500  | -14.11572900 |
| C | -9.74738900  | -3.95894800 | -14.73434300 | N | -5.38748800 | -7.90945200  | -13.52184400 |
| O | -8.67567800  | -4.44021900 | -14.04762700 | C | -5.48711200 | -7.30515200  | -14.83566300 |
| H | -13.91033300 | -3.34181100 | -17.12008900 | C | -4.90441000 | -5.88658000  | -14.77241400 |
| H | -13.52243800 | -1.67486300 | -16.71970100 | O | -5.45062000 | -5.01695700  | -14.06322600 |
| H | -11.50202000 | -1.13283200 | -15.44690700 | C | -6.95440100 | -7.26097900  | -15.30740200 |
| H | -12.14549500 | -5.14577400 | -16.82676400 | O | -7.42289700 | -8.58380700  | -15.41720700 |
| H | -9.56115700  | -1.90090600 | -14.11285600 | N | -3.80269800 | -5.58454000  | -15.49417400 |
| H | -10.21345500 | -5.92215000 | -15.47733900 | C | -2.98785500 | -6.48057800  | -16.35952700 |
| H | -8.30678700  | -3.77743900 | -13.41186700 | C | -2.06137000 | -7.39288100  | -15.54607600 |
| H | -11.86436900 | -1.59921900 | -18.62298900 | C | -2.22986700 | -5.46130400  | -17.23301200 |
| H | -12.24882000 | -3.27956000 | -19.02170700 | C | -1.97279700 | -4.28364500  | -16.27917300 |
| H | -13.48681900 | -2.02285900 | -19.20219100 | C | -3.25751500 | -4.21699700  | -15.43930500 |
| N | -6.97705200  | -5.06073600 | -11.46281500 | H | -3.09170800 | -3.91621800  | -14.40037200 |
| C | -7.52202600  | -6.22079400 | -10.96567900 | H | -3.98922300 | -3.51686800  | -15.86372100 |
| O | -7.30547600  | -7.32436700 | -11.50525400 | H | -1.10872200 | -4.49517700  | -15.63991100 |
| N | -8.31035100  | -6.11359000 | -9.86911500  | H | -1.77254500 | -3.34475400  | -16.80479200 |
| C | -8.56474500  | -4.84982500 | -9.19972100  | H | -1.31381800 | -5.88458600  | -17.65442400 |
| C | -8.64918100  | -3.72187400 | -10.23590300 | H | -2.86541300 | -5.13754900  | -18.06645900 |
| C | -7.35056500  | -3.71727800 | -11.07741400 | H | -3.65303400 | -7.09150100  | -16.97605800 |
| O | -7.39096700  | -2.90457700 | -12.16175900 | H | -1.40845900 | -6.80697700  | -14.88792500 |
| H | -7.77616100  | -4.64813500 | -8.46460800  | H | -2.62489000 | -8.11049100  | -14.94531400 |
| H | -9.50585500  | -4.93897000 | -8.64897400  | H | -1.42429200 | -7.96572600  | -16.23095200 |
| H | -8.67210100  | -2.76098700 | -9.71782700  | H | -4.92663000 | -7.94850700  | -15.51357500 |
| H | -6.47879100  | -5.14432000 | -12.35377400 | H | -8.33830500 | -8.61862200  | -15.07929300 |
| H | -8.76723700  | -6.97009800 | -9.56797600  | H | -6.98842600 | -6.73992300  | -16.28184700 |
| O | -6.25126400  | -3.19689700 | -10.18674600 | H | -7.54288100 | -6.66249900  | -14.60274100 |
| H | -5.55236400  | -3.90216500 | -9.99759700  | H | -6.05900500 | -7.60423900  | -12.81278800 |
| C | -9.91940600  | -3.83148800 | -11.08793600 | H | -3.84104500 | -9.63453600  | -11.41269900 |
| H | -10.80029800 | -3.82462600 | -10.43469100 | H | -5.50714200 | -9.00813700  | -11.26598700 |
| H | -10.00418500 | -2.98753200 | -11.77541200 | H | -5.17956900 | -10.63388900 | -11.96107600 |

### ***SkDHPase.DHT-TS2-II-L***

|   |             |             |              |    |             |             |              |
|---|-------------|-------------|--------------|----|-------------|-------------|--------------|
| C | -2.73099300 | -0.10103300 | -4.80017800  | O  | -6.77596600 | 0.03682600  | -11.22753500 |
| C | -3.63148500 | -0.17344400 | -5.98105800  | O  | -7.72962400 | -0.54682400 | -9.23245000  |
| N | -3.81519400 | 0.85211000  | -6.89731200  | C  | -5.99742500 | 1.45357400  | -14.50229300 |
| C | -4.42666200 | -1.18744100 | -6.43185100  | C  | -6.28728000 | 0.05776300  | -14.97353900 |
| C | -4.69155100 | 0.43490700  | -7.84394600  | N  | -6.27907700 | -1.07193100 | -14.15301000 |
| N | -5.07492100 | -0.80592300 | -7.59140500  | C  | -6.58885100 | -0.33687600 | -16.25118300 |
| C | -9.56332500 | -3.95541200 | -4.12770300  | C  | -6.56041000 | -2.10942000 | -14.93197800 |
| C | -9.04933600 | -3.18629800 | -5.28940800  | N  | -6.75126400 | -1.70702100 | -16.20577400 |
| N | -9.80218000 | -2.23959700 | -5.96715100  | C  | -0.67058700 | -2.26303000 | -10.70606800 |
| C | -7.85258500 | -3.22086800 | -5.95146300  | C  | -1.93412700 | -1.88487200 | -11.39999300 |
| C | -9.06691300 | -1.75196200 | -6.99139800  | N  | -1.97343100 | -1.05702600 | -12.51312100 |
| N | -7.87804700 | -2.33350200 | -7.00973100  | C  | -3.24453100 | -2.20021800 | -11.15291800 |
| C | -6.95819100 | 2.60919400  | -10.69330000 | C  | -3.26554200 | -0.90438700 | -12.89056300 |
| N | -7.26085300 | 1.60263000  | -9.70669400  | N  | -4.06015400 | -1.58182600 | -12.08074700 |
| C | -7.27221000 | 0.27875800  | -10.07928300 | Zn | -6.47655800 | -2.03762700 | -8.44764800  |

|    |              |              |              |   |              |              |              |
|----|--------------|--------------|--------------|---|--------------|--------------|--------------|
| Zn | -6.11666300  | -1.61332100  | -12.08020300 | H | -11.91980600 | -4.13033100  | -6.97354600  |
| H  | -1.68467100  | 0.06243100   | -5.08746000  | H | -14.23653200 | -2.23681400  | -6.19949600  |
| H  | -3.01453200  | 0.70508600   | -4.11201900  | H | -13.71991600 | -2.44665400  | -7.88538000  |
| H  | -4.57537600  | -2.16976300  | -6.01694000  | H | -15.41541400 | -2.67883200  | -7.43536200  |
| H  | -3.38103100  | 1.76434600   | -6.86286000  | H | -16.05252700 | -4.24956300  | -8.95493100  |
| H  | -5.04733600  | 1.05313800   | -8.65477600  | H | -8.89311500  | -6.38942000  | -5.82830200  |
| H  | -8.76252900  | -4.56752900  | -3.70465300  | H | -8.22643500  | -7.83256800  | -6.59207600  |
| H  | -10.38163900 | -4.62663500  | -4.41213400  | H | -10.49162800 | -8.30485100  | -7.29274200  |
| H  | -6.98498200  | -3.83416600  | -5.76511000  | H | -8.83638600  | -7.58042500  | -3.57593200  |
| H  | -10.76238500 | -1.99687200  | -5.76370100  | H | -10.83477600 | -8.31840300  | -11.41068100 |
| H  | -9.39823100  | -1.00645100  | -7.69675000  | H | -11.57769000 | -9.62431900  | -12.32981300 |
| H  | -6.65741700  | 1.73233500   | -13.67474500 | H | -10.95907000 | -7.94772300  | -14.10048600 |
| H  | -6.70118600  | 0.22724600   | -17.16422400 | H | -9.38701700  | -8.21174200  | -14.83913600 |
| H  | -7.05058700  | -2.30335500  | -16.96465500 | H | -9.71217100  | -11.15738700 | -11.30787700 |
| H  | -6.62656700  | -3.13915600  | -14.60930400 | H | -7.64324800  | -9.76752100  | -7.54148400  |
| H  | -0.89342700  | -2.96095200  | -9.89512600  | H | -6.67398300  | -8.98911700  | -8.82543400  |
| H  | 0.03793400   | -2.75819900  | -11.38147100 | H | -7.87324100  | -11.16245100 | -10.08172100 |
| H  | -3.65554600  | -2.85794100  | -10.40287000 | H | -11.02930900 | -10.62494600 | -10.25465400 |
| H  | -1.17333100  | -0.64810500  | -12.97626000 | H | -6.38285700  | -10.69084900 | -8.38678700  |
| H  | -3.58023900  | -0.32422900  | -13.74404900 | H | -8.10402700  | -8.98442600  | -4.36198800  |
| H  | -5.97019600  | 2.43020000   | -11.12271700 | H | -7.22480500  | -7.44195800  | -4.30141000  |
| H  | -9.93215200  | -3.29752700  | -3.33092200  | H | -16.42016100 | -5.55294900  | -7.81462200  |
| H  | -4.96646700  | 1.56140100   | -14.14154500 | H | -15.82779700 | -5.93192900  | -9.43724400  |
| H  | -6.14133400  | 2.16533700   | -15.31976500 | C | -12.65108500 | -2.36154800  | -18.57849700 |
| H  | -6.95455700  | 3.59170800   | -10.21098900 | C | -12.95804300 | -2.49930300  | -17.07698000 |
| H  | -7.68395500  | 2.63178500   | -11.51744700 | C | -11.78895700 | -3.01587400  | -16.26213200 |
| H  | -2.77933600  | -1.04109300  | -4.24515200  | C | -11.14774400 | -2.22403500  | -15.30351800 |
| H  | -0.16257700  | -1.39233400  | -10.27218900 | C | -11.30175000 | -4.31914600  | -16.45155900 |
| H  | -7.87662800  | 1.83807400   | -8.94084200  | C | -10.06557600 | -2.69828100  | -14.55536100 |
| C  | -15.72462500 | -5.23247500  | -8.59996500  | C | -10.22584000 | -4.80880500  | -15.72025900 |
| C  | -14.28161400 | -5.20647300  | -8.07988600  | C | -9.59680500  | -4.00344800  | -14.75704800 |
| C  | -14.08747200 | -4.32317000  | -6.83093200  | O | -8.54707600  | -4.54283100  | -14.08580100 |
| C  | -12.67410600 | -4.48843200  | -6.25845600  | H | -13.81900700 | -3.17116900  | -16.95368000 |
| C  | -14.38496000 | -2.84071900  | -7.10400600  | H | -13.27370000 | -1.52605000  | -16.68110300 |
| C  | -8.21562100  | -7.89747300  | -4.42192900  | H | -11.50085500 | -1.20930800  | -15.12956900 |
| C  | -8.83245100  | -7.48008100  | -5.75484900  | H | -11.77801800 | -4.96677000  | -17.18519300 |
| S  | -10.52811500 | -8.19668500  | -5.94574800  | H | -9.58577000  | -2.06221600  | -13.81605900 |
| C  | -10.15981100 | -10.28197500 | -10.82946900 | H | -9.85641000  | -5.81806100  | -15.87722700 |
| C  | -9.20880000  | -9.66082700  | -9.81546400  | H | -8.20081500  | -3.97671600  | -13.34049500 |
| O  | -9.48155400  | -8.58319300  | -9.25822500  | H | -11.82522200 | -1.66089900  | -18.74767800 |
| C  | -10.63244700 | -9.28428800  | -11.88998700 | H | -12.36452400 | -3.32410700  | -19.01674200 |
| C  | -9.61147100  | -9.08597100  | -13.01072600 | H | -13.52670900 | -1.99308700  | -19.12498500 |
| O  | -8.47091600  | -9.55599200  | -12.94941200 | C | -4.81204700  | -9.59659100  | -11.88594700 |
| N  | -10.04883700 | -8.38214100  | -14.08067000 | C | -4.66565700  | -9.08789400  | -13.30501200 |
| N  | -8.11605900  | -10.37854400 | -9.49306100  | O | -3.95159200  | -9.63213400  | -14.14540400 |
| C  | -7.14861700  | -9.92147700  | -8.50393100  | N | -5.40084000  | -7.96520200  | -13.54502100 |
| H  | -13.96868000 | -6.23033000  | -7.83524400  | C | -5.40348900  | -7.26671100  | -14.81103600 |
| H  | -13.60525100 | -4.86010800  | -8.87624300  | C | -4.76372400  | -5.88274500  | -14.61882500 |
| H  | -14.79841200 | -4.67413700  | -6.06730500  | O | -5.24051200  | -5.09213900  | -13.78396400 |
| H  | -12.44253700 | -5.53605100  | -6.03414900  | C | -6.85481200  | -7.10553200  | -15.30707200 |
| H  | -12.56348000 | -3.91341400  | -5.32853500  | O | -7.49989300  | -8.36323900  | -15.44932000 |

N -3.70506900 -5.53063200 -15.38108800  
 C -2.92395700 -6.39238800 -16.30649000  
 C -2.04530400 -7.39187200 -15.54647600  
 C -2.11980800 -5.34535200 -17.10158100  
 C -1.82272700 -4.24836500 -16.06562500  
 C -3.10381600 -4.19507700 -15.21818500  
 H -2.92489000 -3.98688100 -14.15908500  
 H -3.80683800 -3.43394000 -15.58102800  
 H -0.96647700 -4.53454200 -15.44506200  
 H -1.58900600 -3.28262100 -16.52426500  
 H -1.21830700 -5.77377800 -17.54835900  
 H -2.73664900 -4.93916700 -17.91258000  
 H -3.60776700 -6.93150900 -16.96895500  
 H -1.37713300 -6.87330900 -14.84879800  
 H -2.63781900 -8.12309300 -14.99175700  
 H -1.42271900 -7.94754800 -16.25841600  
 H -4.85261300 -7.89243500 -15.51181600  
 H -7.44498900 -8.83167900 -14.58693700  
 H -6.85783400 -6.64000700 -16.30001300  
 H -7.39762200 -6.44350800 -14.62403900  
 H -5.92738800 -7.57012100 -12.76442200  
 H -4.43778600 -8.85619400 -11.17168700  
 H -5.86667300 -9.76808100 -11.65165000  
 H -4.24398200 -10.52345000 -11.78546100  
 C -2.97579700 -4.24489600 -7.22764800

C -4.27713100 -4.28004900 -8.03831800  
 O -5.30492800 -3.74299500 -7.55563300  
 O -4.19588600 -4.83806200 -9.19189000  
 N -6.33800000 -5.03160900 -10.87604200  
 C -7.00663300 -6.26453100 -10.55830900  
 O -6.71605000 -7.31637200 -11.12839000  
 N -7.90261000 -6.17961900 -9.56252500  
 C -8.28918900 -4.89485500 -8.99493800  
 C -8.47472400 -3.85643600 -10.10955400  
 C -7.12785900 -3.62933300 -10.85780000  
 O -7.27827500 -3.20081200 -12.13776900  
 H -2.25769600 -4.97544800 -7.60483000  
 H -2.54126900 -3.24158400 -7.30504300  
 H -7.52861400 -4.57388800 -8.27950800  
 H -9.22264700 -5.04161000 -8.44425600  
 H -8.70503400 -2.88925200 -9.65286800  
 H -3.18714000 -4.43725600 -6.17234100  
 H -5.91798200 -5.12457100 -11.81299400  
 H -8.45374100 -7.02330200 -9.38730200  
 O -6.25705900 -2.77632400 -10.20495500  
 H -5.26429400 -4.87810300 -9.95976400  
 C -9.65219100 -4.23190300 -11.01866600  
 H -10.54554900 -4.41511000 -10.40845800  
 H -9.88222200 -3.42181100 -11.71277000  
 H -9.46046600 -5.13203100 -11.60949700

***SkDHPase.DHT-EP-II-L***

C -2.73099400 -0.10103300 -4.80017800  
 C -3.59416400 -0.17509100 -6.00761200  
 N -3.69499200 0.81279400 -6.97739600  
 C -4.41920700 -1.17152900 -6.44038300  
 C -4.55602500 0.38902700 -7.93630900  
 N -5.00673500 -0.81845000 -7.64097700  
 C -9.56332600 -3.95541700 -4.12769600  
 C -9.05484600 -3.23668900 -5.32721400  
 N -9.77815100 -2.25250600 -5.98542400  
 C -7.88315000 -3.33606600 -6.02884200  
 C -9.04768100 -1.79961600 -7.02990800  
 N -7.89161400 -2.44148200 -7.08235300  
 C -6.95819100 2.60919600 -10.69330100  
 N -7.24120500 1.55260100 -9.75036400  
 C -7.12929600 0.23483600 -10.10814300  
 O -6.54008300 0.02711200 -11.22852700  
 O -7.57092900 -0.62774500 -9.29481100  
 C -5.99742500 1.45357600 -14.50229300  
 C -6.33733900 0.08362900 -15.01725800  
 N -6.30532400 -1.08098400 -14.24525500  
 C -6.71055200 -0.25851000 -16.29038000  
 C -6.64221200 -2.08656900 -15.04798800  
 N -6.89278900 -1.62724200 -16.28940300

C -0.67058800 -2.26303000 -10.70606800  
 C -1.92643200 -1.96293700 -11.45753700  
 N -1.95809200 -1.14854700 -12.58186600  
 C -3.23119000 -2.33428700 -11.25529200  
 C -3.23642400 -1.04980000 -13.01034600  
 N -4.03602600 -1.75274300 -12.22162800  
 Zn -6.37395900 -2.16505800 -8.41060400  
 Zn -6.05735500 -1.57115300 -12.23499300  
 H -1.66827700 -0.00628100 -5.05662300  
 H -2.99150700 0.74616400 -4.15334200  
 H -4.61603400 -2.13296500 -5.99716900  
 H -3.21473400 1.70225400 -6.97190600  
 H -4.83454100 0.97608400 -8.79772600  
 H -8.77735500 -4.59647800 -3.72025800  
 H -10.42259100 -4.59204600 -4.36523800  
 H -7.03546000 -3.98386700 -5.86755100  
 H -10.71379500 -1.95254000 -5.74652600  
 H -9.35815900 -1.02919800 -7.71807800  
 H -6.59314300 1.69945000 -13.61791900  
 H -6.86020100 0.34193500 -17.17427600  
 H -7.22588800 -2.19192000 -17.05893600  
 H -6.70494900 -3.13219300 -14.77361700  
 H -0.89186400 -2.95928700 -9.89345600

|   |              |              |              |   |              |              |              |
|---|--------------|--------------|--------------|---|--------------|--------------|--------------|
| H | 0.08930000   | -2.72897500  | -11.34510000 | H | -7.63078600  | -11.22417100 | -10.12612900 |
| H | -3.63287100  | -3.01722600  | -10.51699000 | H | -10.73897800 | -11.03095400 | -10.58395200 |
| H | -1.15720100  | -0.71659100  | -13.02246500 | H | -6.23027000  | -10.50962800 | -8.45363100  |
| H | -3.54145400  | -0.48348600  | -13.87693400 | H | -7.99561100  | -8.96600200  | -4.33620700  |
| H | -5.95119200  | 2.49193700   | -11.09976900 | H | -7.28955100  | -7.33998500  | -4.23324200  |
| H | -9.86817300  | -3.26020700  | -3.33580900  | H | -16.38720500 | -5.75269700  | -7.89741200  |
| H | -4.94148800  | 1.53170600   | -14.21357300 | H | -15.78549900 | -5.75655100  | -9.56038700  |
| H | -6.18906900  | 2.20375500   | -15.27402000 | C | -12.65108500 | -2.36154800  | -18.57849700 |
| H | -7.01508700  | 3.57131300   | -10.17590200 | C | -13.09418000 | -2.88705400  | -17.20307000 |
| H | -7.66410900  | 2.62831900   | -11.53475400 | C | -11.92219700 | -3.33946800  | -16.36074800 |
| H | -2.84940700  | -1.01459300  | -4.21258200  | C | -11.41134600 | -2.55087200  | -15.32503700 |
| H | -0.23126500  | -1.35783400  | -10.26854600 | C | -11.27009900 | -4.55083200  | -16.63891000 |
| H | -7.85679900  | 1.73801400   | -8.97173000  | C | -10.28794700 | -2.94045800  | -14.59122600 |
| C | -15.72463100 | -5.23250100  | -8.59995100  | C | -10.15090000 | -4.95684100  | -15.92126400 |
| C | -14.28160600 | -5.20644000  | -8.07990400  | C | -9.65062300  | -4.15076100  | -14.88945900 |
| C | -14.12715600 | -4.57859900  | -6.68082300  | O | -8.53915700  | -4.59372900  | -14.23704700 |
| C | -12.69210200 | -4.74625400  | -6.16493700  | H | -13.79492600 | -3.72014700  | -17.34634000 |
| C | -14.53953100 | -3.09861400  | -6.64831700  | H | -13.65018500 | -2.10284300  | -16.67451700 |
| C | -8.21562100  | -7.89747300  | -4.42192900  | H | -11.89806300 | -1.60814100  | -15.08287300 |
| C | -8.76723800  | -7.55904500  | -5.80497500  | H | -11.64811900 | -5.18961700  | -17.43484600 |
| S | -10.35808000 | -8.45342600  | -6.10822700  | H | -9.90596400  | -2.31267800  | -13.79002300 |
| C | -9.89105900  | -10.55594900 | -11.09299200 | H | -9.65146700  | -5.89569300  | -16.14140100 |
| C | -9.10893200  | -9.83774400  | -9.99955500  | H | -8.32623900  | -4.03054500  | -13.46170300 |
| O | -9.54351000  | -8.80406700  | -9.46733300  | H | -11.97836400 | -1.50268800  | -18.47059700 |
| C | -10.42173100 | -9.60868600  | -12.17362200 | H | -12.11581100 | -3.13450000  | -19.14156700 |
| C | -9.48059800  | -9.47215600  | -13.36958000 | H | -13.51241200 | -2.04450500  | -19.17778800 |
| O | -8.36762800  | -10.00459100 | -13.40589000 | C | -4.81204300  | -9.59659900  | -11.88594600 |
| N | -9.97822400  | -8.76591400  | -14.41558700 | C | -4.61785800  | -9.13243300  | -13.31787000 |
| N | -7.96761700  | -10.43372900 | -9.59592200  | O | -3.75141000  | -9.60842700  | -14.05080400 |
| C | -7.14861700  | -9.92147600  | -8.50393200  | N | -5.45301600  | -8.11950300  | -13.68338700 |
| H | -13.89434000 | -6.23335900  | -8.04514500  | C | -5.42976700  | -7.50036100  | -14.99230900 |
| H | -13.64182200 | -4.66175500  | -8.79128100  | C | -4.87781100  | -6.06409700  | -14.91157300 |
| H | -14.79254300 | -5.12793500  | -5.99750200  | O | -5.41069400  | -5.23245400  | -14.15400500 |
| H | -12.38474500 | -5.79824300  | -6.14132500  | C | -6.86728400  | -7.43324700  | -15.55180100 |
| H | -12.59722600 | -4.34517700  | -5.14713600  | O | -7.41493300  | -8.72026600  | -15.77663800 |
| H | -11.98226600 | -4.20903800  | -6.81064500  | N | -3.86176400  | -5.70113500  | -15.72701800 |
| H | -14.41207400 | -2.67646100  | -5.64351900  | C | -2.95330600  | -6.59698000  | -16.48920400 |
| H | -13.92562000 | -2.50720100  | -7.34278100  | C | -2.04530500  | -7.39187100  | -15.54647600 |
| H | -15.58717400 | -2.95347400  | -6.92988500  | C | -2.19705600  | -5.59227000  | -17.37902900 |
| H | -16.12581800 | -4.22469900  | -8.75216200  | C | -2.05691900  | -4.34682500  | -16.48788500 |
| H | -8.93699500  | -6.48121500  | -5.89908700  | C | -3.38001100  | -4.30894800  | -15.70647600 |
| H | -8.05950100  | -7.85057000  | -6.58430100  | H | -3.27382700  | -3.96088500  | -14.67461500 |
| H | -10.23539300 | -8.53595400  | -7.45336200  | H | -4.12287100  | -3.66041400  | -16.19035000 |
| H | -8.93038200  | -7.64102200  | -3.63137200  | H | -1.21232200  | -4.46541600  | -15.80032400 |
| H | -10.58942900 | -8.61759900  | -11.73561100 | H | -1.88843400  | -3.43009400  | -17.06133200 |
| H | -11.39223400 | -9.96044800  | -12.54364000 | H | -1.23698200  | -5.98991300  | -17.71949300 |
| H | -10.82456900 | -8.22323900  | -14.32973600 | H | -2.79653300  | -5.35495700  | -18.26644600 |
| H | -9.35364600  | -8.59751400  | -15.20324200 | H | -3.54201000  | -7.28306800  | -17.10513100 |
| H | -9.29287800  | -11.34636400 | -11.55452900 | H | -1.48087600  | -6.71867600  | -14.89003700 |
| H | -7.67952800  | -10.01032600 | -7.55017300  | H | -2.60761800  | -8.10037300  | -14.93510900 |
| H | -6.89328400  | -8.87184200  | -8.67454300  | H | -1.32235600  | -7.97209300  | -16.13354700 |



H -4.82575500 -8.13709900 -15.63824600  
H -7.42224600 -9.21722100 -14.92594300  
H -6.85741500 -6.92633500 -16.52422500  
H -7.47970400 -6.83548000 -14.86425900  
H -6.20857900 -7.85372900 -13.03693900  
H -4.29444000 -8.90817000 -11.20663700  
H -5.87040800 -9.61219800 -11.61093000  
H -4.37165800 -10.58977400 -11.77615700  
C -2.97579700 -4.24489600 -7.22764900  
C -4.21837300 -4.20189000 -8.11948200  
O -5.26727100 -3.65970900 -7.58727600  
O -4.13994900 -4.63899600 -9.27915900  
N -6.09834200 -5.71210500 -11.27722700  
C -7.10560600 -6.59386200 -11.03414400  
O -7.46269900 -7.47043000 -11.84285500  
N -7.76606700 -6.44835300 -9.83386300  
C -7.97174300 -5.14400000 -9.22312500

C -8.53131100 -4.04310300 -10.17918200  
C -7.44187900 -3.29259500 -10.93135600  
O -7.57002700 -2.96120900 -12.15750200  
H -2.23537000 -4.93736000 -7.63369400  
H -2.53572800 -3.24128300 -7.17671800  
H -7.05269500 -4.79149800 -8.74931300  
H -8.70203900 -5.29266400 -8.42264300  
H -8.93006300 -3.26308100 -9.51296200  
H -3.23651700 -4.53830600 -6.20576300  
H -5.69915300 -5.72246200 -12.21338400  
H -8.51701600 -7.13031200 -9.73532800  
O -6.41776300 -2.85803700 -10.30450300  
H -5.54121800 -5.30270400 -10.52394000  
C -9.68197700 -4.54697200 -11.05530000  
H -10.44792800 -5.00909000 -10.42252800  
H -10.15109100 -3.72565100 -11.60412000  
H -9.35244400 -5.29703700 -11.77856900

**SkDHPase.DHT-ES-II-D**

C -6.01387700 -5.71069600 -3.33604700  
C -5.16760400 -5.15751300 -2.24627000  
N -4.67430700 -5.89561500 -1.18004600  
C -4.67546400 -3.89868600 -2.05427600  
C -3.91831400 -5.07818100 -0.40389300  
N -3.89270900 -3.85889800 -0.91589800  
C -7.39988300 1.32996500 -0.09609700  
C -6.22010600 0.48074800 0.24268600  
N -5.93199900 0.07453100 1.53894600  
C -5.23226000 -0.08278800 -0.52310100  
C -4.82129500 -0.69980100 1.51635600  
N -4.37198700 -0.81199100 0.27813500  
C -1.92331300 -5.87393200 3.23541400  
N -2.66336900 -4.77392800 2.65512000  
C -2.01205900 -3.72530200 2.03752300  
O -0.75907800 -3.90119900 1.85033100  
O -2.71332700 -2.73299700 1.68903200  
C 2.15887500 -5.63537900 3.02146000  
C 2.76700300 -4.28537100 2.77239100  
N 2.29133700 -3.33557300 1.86022900  
C 3.88806400 -3.78591700 3.38446500  
C 3.13544300 -2.31385300 1.93275400  
N 4.11270000 -2.54276300 2.83306200  
C 0.52147500 -5.35315300 -4.31604300  
C 0.93252500 -4.95998300 -2.93811900  
N 1.90074300 -5.59275400 -2.16786800  
C 0.46297100 -3.95147500 -2.14727200  
C 1.97645100 -4.95865700 -0.97011600  
N 1.11194200 -3.95724200 -0.92712600  
C -2.88865400 -2.27687000 -4.60563700  
C -2.36424500 -1.69078900 -3.28831900

O -3.23886300 -1.45863000 -2.37581400  
O -1.13036400 -1.53614000 -3.15897100  
Zn -2.90722100 -2.08921100 -0.38835500  
Zn 0.39084600 -2.84301600 0.66761000  
N 0.72285300 0.73661000 -0.19511900  
C 0.34827000 2.00254000 -0.70236100  
O 0.96372700 2.48898300 -1.64887900  
N -0.69146300 2.58583500 -0.07990900  
C -1.46932700 1.90783200 0.94917000  
C -0.53466900 1.09938200 1.85998700  
C 0.36584300 0.21899100 1.01065000  
O 0.80526300 -0.87113200 1.39823300  
H -5.50153100 -6.50467800 -3.89442800  
H -6.95747900 -6.12778300 -2.96149400  
H -4.80388000 -3.01367200 -2.65385300  
H -4.84772900 -6.87556900 -1.00433000  
H -3.43662300 -5.38913400 0.51245300  
H -7.47684400 1.43894200 -1.18102400  
H -7.32221900 2.33382900 0.33591200  
H -5.07357500 -0.03701300 -1.58962400  
H -6.45222300 0.33398500 2.36584400  
H -4.38023600 -1.17641600 2.37755100  
H 1.08719500 -5.54782100 3.22393000  
H 4.52781900 -4.20430400 4.14636100  
H 4.77706800 -1.84124100 3.14305900  
H 3.06667800 -1.39944100 1.36753100  
H -0.20627400 -4.62728500 -4.68658000  
H 1.36637400 -5.36474900 -5.01610500  
H -0.27279100 -3.20756300 -2.40637100  
H 2.45818900 -6.38912200 -2.44495700  
H 2.65141600 -5.24088400 -0.17662100

|   |             |             |             |   |             |             |             |
|---|-------------|-------------|-------------|---|-------------|-------------|-------------|
| H | -1.26926400 | -6.31823000 | 2.48248600  | H | 3.56377200  | 6.52978400  | 1.08438300  |
| H | -2.17100200 | -2.11269100 | -5.41278400 | H | 4.50635800  | 5.54159000  | -0.01863600 |
| H | -3.02763600 | -3.35758900 | -4.47577800 | H | 1.07562600  | 7.43051000  | -2.32741100 |
| H | -2.22617700 | 1.24862500  | 0.50126900  | H | -2.49482800 | 4.97759500  | -3.61165700 |
| H | -1.99196500 | 2.66795100  | 1.53616100  | H | -1.23598400 | 3.72956000  | -3.37406700 |
| H | -8.33630200 | 0.88220000  | 0.25919200  | H | 0.05913700  | 6.21997400  | -3.85833200 |
| H | 2.27136900  | -6.30352300 | 2.15721100  | H | -0.20686600 | 7.89103800  | -1.20358800 |
| H | 2.64327100  | -6.11375000 | 3.87724100  | H | -1.28819000 | 4.67159400  | -4.88272600 |
| H | -2.63065400 | -6.63540000 | 3.57803000  | H | -5.79179700 | 4.54976700  | -3.93149700 |
| H | -1.30150100 | -5.56931000 | 4.08833400  | H | -6.14486300 | 2.84230000  | -3.59601000 |
| H | -6.26238800 | -4.91624800 | -4.04421400 | H | -4.92922000 | 6.49458300  | 5.51914600  |
| H | -3.85854500 | -1.84793600 | -4.87553200 | H | -3.24174000 | 5.97459800  | 5.61672900  |
| H | 0.05592700  | -6.34681600 | -4.34338800 | C | 5.32470200  | 1.04664600  | 7.57886100  |
| H | -3.56826400 | -4.54093900 | 3.03976500  | C | 5.38428200  | -0.09434100 | 6.55214700  |
| H | 1.46756400  | 0.27159400  | -0.70658200 | C | 4.76382500  | 0.29936400  | 5.22988200  |
| H | -0.95108400 | 3.50868300  | -0.43577700 | C | 5.50990100  | 0.37348000  | 4.04746500  |
| O | -0.98784500 | -1.88542100 | -0.41009400 | C | 3.41017000  | 0.66486500  | 5.16759300  |
| H | -0.80188000 | -1.59461200 | -1.33005100 | C | 4.93236400  | 0.79025100  | 2.84099600  |
| C | -4.27212700 | 5.61650600  | 5.51068900  | C | 2.82584000  | 1.09414900  | 3.98457500  |
| C | -4.44611000 | 4.81357800  | 4.21519300  | C | 3.58076700  | 1.15717100  | 2.80569600  |
| C | -5.89584800 | 4.36267300  | 3.94839200  | O | 2.95402300  | 1.58570900  | 1.67572300  |
| C | -6.03139100 | 3.76098400  | 2.54390200  | H | 4.86843800  | -0.97367500 | 6.96348100  |
| C | -6.41007500 | 3.37704800  | 5.00913900  | H | 6.42786700  | -0.39398000 | 6.39585200  |
| C | -5.99743900 | 3.82703800  | -3.13592700 | H | 6.57036100  | 0.12731400  | 4.06837500  |
| C | -4.84976500 | 3.77326300  | -2.13012700 | H | 2.80114900  | 0.61431300  | 6.06705800  |
| S | -4.63628800 | 5.42151700  | -1.31467100 | H | 5.53008500  | 0.85069300  | 1.93589500  |
| C | 0.46823500  | 7.07474700  | -1.49003000 | H | 1.77801400  | 1.37450500  | 3.95372300  |
| C | -0.43738900 | 5.92321500  | -1.91344200 | H | 3.41532500  | 1.24367400  | 0.87144800  |
| O | -1.08954600 | 5.28099100  | -1.07390700 | H | 5.85392200  | 1.93207200  | 7.21015800  |
| C | 1.35855200  | 6.73470200  | -0.29031900 | H | 4.29121600  | 1.34121000  | 7.78916500  |
| C | 2.63314500  | 5.99705100  | -0.68965000 | H | 5.78456900  | 0.74578700  | 8.52709300  |
| O | 2.73511500  | 5.40698400  | -1.77166500 | C | -1.27020200 | 0.30139500  | 2.93672600  |
| N | 3.63838200  | 6.02253300  | 0.21591600  | H | -1.92317700 | 0.96483700  | 3.51522300  |
| N | -0.55880200 | 5.71698800  | -3.23846700 | H | -1.86896300 | -0.49998100 | 2.49507700  |
| C | -1.45128700 | 4.71225200  | -3.80427600 | H | -0.55692700 | -0.16162000 | 3.62352300  |
| H | -4.10946600 | 5.42541600  | 3.36739900  | H | 0.15352400  | 1.81691100  | 2.33162100  |
| H | -3.79129000 | 3.92825400  | 4.23543400  | C | 2.24035400  | 2.97381100  | -4.45191700 |
| H | -6.53122600 | 5.26054500  | 3.98795300  | C | 3.61495600  | 2.54544200  | -3.98459100 |
| H | -5.71362500 | 4.46286000  | 1.76405600  | O | 4.58864100  | 2.46260600  | -4.72927600 |
| H | -7.07362800 | 3.48347000  | 2.33994800  | N | 3.67034900  | 2.25659100  | -2.64691500 |
| H | -5.41460300 | 2.85618200  | 2.44612000  | C | 4.90896500  | 1.91129600  | -1.97908300 |
| H | -7.44222700 | 3.07302700  | 4.79569900  | C | 4.78306100  | 0.49459200  | -1.40826700 |
| H | -5.78969300 | 2.46952000  | 5.03187700  | O | 3.97657800  | 0.27830200  | -0.46794900 |
| H | -6.39977100 | 3.80783600  | 6.01528700  | C | 5.21562500  | 2.93111000  | -0.85875700 |
| H | -4.50270600 | 5.01940900  | 6.39937800  | O | 5.31237000  | 4.24657200  | -1.36687900 |
| H | -5.03725200 | 3.01418300  | -1.36460500 | N | 5.50563000  | -0.51604300 | -1.91520900 |
| H | -3.91521300 | 3.51180100  | -2.63254800 | C | 6.52373900  | -0.48605800 | -3.00526600 |
| H | -3.31997300 | 5.29995100  | -1.02910600 | C | 5.89279800  | -0.57192500 | -4.40133800 |
| H | -6.93839100 | 4.11835200  | -2.65535000 | C | 7.38725100  | -1.71168500 | -2.64845300 |
| H | 0.78994800  | 6.10279600  | 0.40372500  | C | 6.37054200  | -2.72944900 | -2.10611600 |
| H | 1.62219000  | 7.64869500  | 0.25432300  | C | 5.37271500  | -1.86403600 | -1.32114800 |

|   |            |             |             |   |            |             |             |
|---|------------|-------------|-------------|---|------------|-------------|-------------|
| H | 4.33806400 | -2.21287800 | -1.39462400 | H | 6.68741500 | -0.63906100 | -5.15324400 |
| H | 5.61814400 | -1.80701300 | -0.25446100 | H | 5.68694900 | 1.98246400  | -2.73911400 |
| H | 5.86591100 | -3.24106800 | -2.93260100 | H | 4.45121600 | 4.47449900  | -1.78789800 |
| H | 6.83074400 | -3.49594700 | -1.47609100 | H | 6.18333500 | 2.69650900  | -0.39972900 |
| H | 7.94845500 | -2.07997100 | -3.51150900 | H | 4.44704800 | 2.86286400  | -0.07643800 |
| H | 8.10863500 | -1.44498500 | -1.86665700 | H | 2.80590300 | 2.32494300  | -2.10857100 |
| H | 7.10796600 | 0.43427800  | -2.92559200 | H | 1.50870100 | 2.17771400  | -4.28142100 |
| H | 5.25710000 | -1.45946500 | -4.49669100 | H | 1.90552300 | 3.84716200  | -3.88391800 |
| H | 5.30048800 | 0.31895600  | -4.62420600 | H | 2.29089100 | 3.20771000  | -5.51677800 |

### **SkDHPase.DHT-TS1-II-D**

|    |             |            |             |   |             |             |             |
|----|-------------|------------|-------------|---|-------------|-------------|-------------|
| C  | 3.99702300  | 7.60046100 | -1.60936400 | H | 7.30650500  | 0.60729300  | -1.39453400 |
| C  | 3.15118500  | 6.62676400 | -0.87413200 | H | 7.44839500  | -0.47048200 | -0.00356200 |
| N  | 2.14481600  | 6.95617700 | 0.02350200  | H | 4.66683600  | 1.61996200  | -1.48011100 |
| C  | 3.14194100  | 5.26387700 | -0.92241900 | H | 6.37441900  | 1.04680300  | 2.31884000  |
| C  | 1.57958600  | 5.80633500 | 0.47339300  | H | 4.03733400  | 2.04625200  | 2.63729700  |
| N  | 2.16056500  | 4.76279400 | -0.09026200 | H | -2.63024700 | 3.67049000  | 4.57097600  |
| C  | 7.29761000  | 0.57284100 | -0.30242500 | H | -5.82993700 | 1.64018300  | 4.48175200  |
| C  | 6.01990600  | 1.12904500 | 0.21048100  | H | -5.56701600 | -0.26835300 | 2.79223800  |
| N  | 5.75535400  | 1.30010400 | 1.56110900  | H | -3.59069600 | 0.09708300  | 1.24661400  |
| C  | 4.89014700  | 1.56703100 | -0.42577600 | H | -1.38758300 | 5.42157500  | -3.46398200 |
| C  | 4.51198500  | 1.81390300 | 1.69793700  | H | -3.11394500 | 5.78468000  | -3.57009900 |
| N  | 3.96062500  | 1.98282000 | 0.50807100  | H | -0.85421100 | 3.46296200  | -1.64658200 |
| C  | 0.22937300  | 4.92703100 | 4.60360700  | H | -4.20846900 | 5.85016300  | -0.82583200 |
| N  | 1.22565600  | 4.38300400 | 3.71580200  | H | -3.99519900 | 4.15948300  | 1.06544100  |
| C  | 0.89667500  | 3.47158000 | 2.75143800  | H | -0.58609200 | 5.37042200  | 4.02786900  |
| O  | -0.35485700 | 3.33619300 | 2.51610100  | H | 1.12157100  | 3.82433800  | -4.67561400 |
| O  | 1.85574500  | 2.89151400 | 2.16489700  | H | 1.75532700  | 4.93749200  | -3.43692900 |
| C  | -3.65021200 | 3.68972100 | 4.17366000  | H | 8.16369400  | 1.14692900  | 0.05070400  |
| C  | -3.98509800 | 2.40510200 | 3.47656600  | H | -3.71443800 | 4.55186700  | 3.49758500  |
| N  | -3.25154700 | 1.86214400 | 2.41950700  | H | -4.34298500 | 3.86133900  | 5.00199400  |
| C  | -5.04690400 | 1.57991800 | 3.74171200  | H | 0.68690700  | 5.70938100  | 5.21613400  |
| C  | -3.87788500 | 0.74589600 | 2.06213700  | H | -0.20158800 | 4.17110600  | 5.27473000  |
| N  | -4.96484900 | 0.54212000 | 2.83564100  | H | 4.69969100  | 7.06011800  | -2.24841400 |
| C  | -2.24162400 | 5.81192200 | -2.90530800 | H | 2.86383200  | 3.83414300  | -4.25893800 |
| C  | -2.44015300 | 4.98644100 | -1.68094600 | H | -2.03992300 | 6.86409100  | -2.66683400 |
| N  | -3.46662900 | 5.16628400 | -0.76346900 | H | 2.19237200  | 4.37217500  | 4.00594900  |
| C  | -1.70861800 | 3.94135600 | -1.18879100 | C | 5.59938000  | -5.71727100 | 3.83809300  |
| C  | -3.32404600 | 4.25156200 | 0.22574000  | C | 5.51223300  | -4.58198700 | 2.81003400  |
| N  | -2.26097800 | 3.49570300 | -0.00300800 | C | 6.32310800  | -3.32945100 | 3.19955700  |
| C  | 1.84739100  | 3.93254100 | -3.86668100 | C | 6.36166400  | -2.32351200 | 2.04238700  |
| C  | 1.58199100  | 2.90574000 | -2.75899700 | C | 5.79732900  | -2.65916400 | 4.47805200  |
| O  | 2.54571900  | 2.67513700 | -1.94081300 | C | 6.50283900  | -1.30217800 | -3.94866800 |
| O  | 0.44114600  | 2.39947700 | -2.66422200 | C | 6.01867000  | -2.13350700 | -2.76196700 |
| Zn | 2.09145100  | 2.68831100 | 0.09766800  | S | 7.35491200  | -3.08792300 | -1.92094100 |
| Zn | -1.39889800 | 2.19862900 | 1.31284600  | C | 0.70815900  | -5.68598900 | -2.66016100 |
| H  | 3.40416000  | 8.26223800 | -2.25364300 | C | 1.64841900  | -4.58679600 | -3.15174500 |
| H  | 4.58410900  | 8.23719800 | -0.93528000 | O | 2.47712800  | -4.07029500 | -2.39024100 |
| H  | 3.74439400  | 4.60156700 | -1.52106400 | C | -0.17446700 | -5.17615600 | -1.50259200 |
| H  | 1.87679500  | 7.89056900 | 0.30018300  | C | -0.93897500 | -6.24223600 | -0.72765100 |
| H  | 0.77638400  | 5.77116900 | 1.19343300  | O | -2.13747000 | -6.13286800 | -0.45918700 |

|   |             |             |             |   |             |             |             |
|---|-------------|-------------|-------------|---|-------------|-------------|-------------|
| N | -0.22954500 | -7.32446600 | -0.31054500 | C | 0.24104300  | -1.45983300 | -1.53654300 |
| N | 1.55458100  | -4.24224300 | -4.45422000 | O | -0.24127500 | -2.02946300 | -2.52555800 |
| C | 2.33136500  | -3.14016900 | -5.00624400 | N | 1.53213900  | -1.62100700 | -1.17105000 |
| H | 5.87571300  | -4.94658600 | 1.84008900  | C | 2.11225800  | -1.07972100 | 0.05052900  |
| H | 4.46003900  | -4.29760900 | 2.65748200  | C | 1.01987100  | -0.85404700 | 1.09208700  |
| H | 7.35721500  | -3.65526800 | 3.39018200  | C | -0.16700000 | -0.10728700 | 0.48325900  |
| H | 6.75633000  | -2.78026100 | 1.12770000  | O | -1.13763000 | 0.23889800  | 1.27902400  |
| H | 7.00091600  | -1.46617700 | 2.29346500  | H | 2.65292100  | -0.15084300 | -0.15627200 |
| H | 5.35634900  | -1.93975100 | 1.81932400  | H | 2.83797700  | -1.80634700 | 0.43119400  |
| H | 6.39073400  | -1.77103400 | 4.72984700  | H | -1.53905800 | -0.53389500 | -0.99973000 |
| H | 4.75375800  | -2.33936700 | 4.35025200  | H | 2.02474900  | -2.35321000 | -1.68433000 |
| H | 5.83489400  | -3.32979700 | 5.34215200  | O | 0.40580100  | 1.60253700  | -0.00608500 |
| H | 5.15628300  | -5.43740200 | 4.79984900  | H | 0.27077500  | 1.63239800  | -0.99099400 |
| H | 5.61889500  | -1.48651000 | -1.97397200 | H | 0.56752700  | -1.83782700 | 1.29150200  |
| H | 5.21316100  | -2.81973700 | -3.04019800 | C | 1.52472700  | -0.30645400 | 2.42275300  |
| H | 7.70898400  | -3.84667200 | -2.98067700 | H | 1.91138400  | 0.70734000  | 2.33009300  |
| H | 7.29732800  | -0.60996000 | -3.65165900 | H | 0.71462100  | -0.29178700 | 3.15702000  |
| H | -0.91271300 | -4.46632600 | -1.87877300 | H | 2.31517500  | -0.95921900 | 2.81159300  |
| H | 0.46503000  | -4.63859200 | -0.79084000 | C | -1.71080900 | -2.30640800 | -5.31853800 |
| H | 0.77480300  | -7.37611200 | -0.38898700 | C | -3.06469000 | -2.25341700 | -4.63750300 |
| H | -0.69754100 | -7.99841100 | 0.28016300  | O | -4.11493000 | -2.39328700 | -5.26325700 |
| H | 0.08343600  | -6.08028900 | -3.46940500 | N | -2.99876600 | -2.02121700 | -3.30001800 |
| H | 3.39065800  | -3.28793400 | -4.78290700 | C | -4.16149200 | -2.08862300 | -2.44003000 |
| H | 2.00881200  | -2.18243000 | -4.58291900 | C | -4.35046300 | -0.71360400 | -1.78618200 |
| H | 0.77341200  | -4.59224200 | -4.99022600 | O | -3.48292300 | -0.28453700 | -0.99396500 |
| H | 1.35545500  | -6.50670000 | -2.32856400 | C | -3.99441000 | -3.17125800 | -1.35560100 |
| H | 2.19405900  | -3.12152900 | -6.08926400 | O | -3.76001100 | -4.39974500 | -2.00312600 |
| H | 6.90050100  | -1.94037200 | -4.74566400 | N | -5.44104400 | 0.02672800  | -2.06883100 |
| H | 5.67290600  | -0.72021500 | -4.36946700 | C | -6.55029500 | -0.27644000 | -3.01477100 |
| H | 6.64255400  | -6.00264700 | 4.02122800  | C | -6.16517400 | 0.00827100  | -4.47238100 |
| H | 5.07114200  | -6.60968500 | 3.48370600  | C | -7.66463200 | 0.64752200  | -2.48660500 |
| C | -4.78843300 | -4.55252200 | 6.66596000  | C | -6.90711700 | 1.90381100  | -2.02656100 |
| C | -3.27675800 | -4.73909600 | 6.45899700  | C | -5.61013100 | 1.34187300  | -1.42255500 |
| C | -2.82911300 | -4.13666900 | 5.14798500  | H | -4.73148400 | 1.96889200  | -1.60216300 |
| C | -2.48752100 | -2.78297600 | 5.05840900  | H | -5.68971700 | 1.20212800  | -0.33733300 |
| C | -2.84509700 | -4.88863100 | 3.96444700  | H | -6.68317000 | 2.54757900  | -2.88389800 |
| C | -2.19317200 | -2.18743300 | 3.83221900  | H | -7.47245600 | 2.50164900  | -1.30512600 |
| C | -2.55442000 | -4.31620900 | 2.72977100  | H | -8.42108300 | 0.85405600  | -3.24877000 |
| C | -2.23969700 | -2.95474900 | 2.66223200  | H | -8.16700800 | 0.17676900  | -1.63262200 |
| O | -1.98197300 | -2.42101200 | 1.43159400  | H | -6.83836800 | -1.32581200 | -2.91041700 |
| H | -3.03549100 | -5.80919900 | 6.48441900  | H | -5.82427300 | 1.04271600  | -4.59728700 |
| H | -2.73462800 | -4.27626300 | 7.29370800  | H | -5.38459400 | -0.67232200 | -4.82105800 |
| H | -2.45619200 | -2.17825100 | 5.96302600  | H | -7.04203500 | -0.13933800 | -5.11417000 |
| H | -3.10208800 | -5.94516400 | 4.00935800  | H | -4.99816300 | -2.36010500 | -3.08364900 |
| H | -1.92348400 | -1.13508300 | 3.77684600  | H | -3.27577700 | -4.99121700 | -1.39104700 |
| H | -2.57150700 | -4.90277700 | 1.81547000  | H | -4.91954800 | -3.19367300 | -0.74961400 |
| H | -1.82512400 | -1.45611200 | 1.51092600  | H | -3.17561700 | -2.89197500 | -0.68164600 |
| H | -5.11950200 | -4.99096300 | 7.61503300  | H | -2.07306900 | -2.00208300 | -2.87205800 |
| H | -5.05201800 | -3.48847300 | 6.67437600  | H | -1.72266500 | -1.62120600 | -6.17244900 |
| H | -5.35422800 | -5.02822500 | 5.85699700  | H | -0.88107000 | -2.06257600 | -4.65618100 |
| N | -0.54992800 | -0.63485900 | -0.74374000 | H | -1.57415000 | -3.31511600 | -5.72788700 |

**SkDHPase.DHT-INT1-II-D**

|    |             |             |             |   |             |             |             |
|----|-------------|-------------|-------------|---|-------------|-------------|-------------|
| C  | 3.79074600  | 7.65758800  | -1.70683100 | H | -1.49217500 | 5.28264300  | -3.54466300 |
| C  | 2.95156000  | 6.68170900  | -0.96836600 | H | -3.22415400 | 5.58432200  | -3.72101100 |
| N  | 1.88629700  | 6.99752500  | -0.13584300 | H | -0.96691700 | 3.38208100  | -1.63719000 |
| C  | 3.00772900  | 5.32012400  | -0.96013000 | H | -4.43133100 | 5.68057000  | -1.04688600 |
| C  | 1.35152000  | 5.84059900  | 0.33318100  | H | -4.25409300 | 4.05550200  | 0.90399100  |
| N  | 2.00860700  | 4.80538200  | -0.15806500 | H | -0.74527800 | 5.42587000  | 3.92318900  |
| C  | 7.29287100  | 0.75701800  | -0.25547500 | H | 1.04002100  | 3.74636300  | -4.71635800 |
| C  | 6.02280300  | 1.32888700  | 0.25271200  | H | 1.67891800  | 4.90587700  | -3.52159800 |
| N  | 5.76579000  | 1.54739500  | 1.59778200  | H | 8.16355100  | 1.34469700  | 0.06224600  |
| C  | 4.88634400  | 1.73124700  | -0.39260800 | H | -3.96879100 | 4.42891300  | 3.36911900  |
| C  | 4.51702200  | 2.05025300  | 1.72392700  | H | -4.40774200 | 3.78156400  | 4.95649200  |
| N  | 3.95902300  | 2.16926400  | 0.53143300  | H | 0.52786600  | 5.75227700  | 5.11537000  |
| C  | 0.05040700  | 4.97106900  | 4.51698800  | H | -0.40768300 | 4.24449000  | 5.20289300  |
| N  | 1.03492800  | 4.37632000  | 3.64735900  | H | 4.54736800  | 7.12034700  | -2.28378000 |
| C  | 0.69739100  | 3.51774600  | 2.63993700  | H | 2.78730300  | 3.78893400  | -4.32363300 |
| O  | -0.54524500 | 3.46171600  | 2.33324400  | H | -2.22031000 | 6.72072500  | -2.80637700 |
| O  | 1.65049500  | 2.90296500  | 2.07694100  | H | 1.99359200  | 4.31916100  | 3.95748700  |
| C  | -3.78542600 | 3.60821500  | 4.07431400  | C | 5.75040400  | -5.51410200 | 3.97383200  |
| C  | -4.09721000 | 2.27332300  | 3.46921700  | C | 5.63789900  | -4.39896800 | 2.92645400  |
| N  | -3.38253400 | 1.72880300  | 2.40416300  | C | 6.33618600  | -3.08691300 | 3.33727200  |
| C  | -5.09124600 | 1.39565600  | 3.81364600  | C | 6.36381000  | -2.09546800 | 2.16705500  |
| C  | -3.94532000 | 0.55853000  | 2.11581200  | C | 5.69826000  | -2.44004000 | 4.57613400  |
| N  | -4.98183200 | 0.32711100  | 2.94489300  | C | 6.58900300  | -1.20070000 | -3.87689700 |
| C  | -2.37821000 | 5.65719100  | -3.02646900 | C | 6.11342000  | -2.02877200 | -2.68419900 |
| C  | -2.59672700 | 4.85493000  | -1.78981200 | S | 7.47095300  | -2.89830700 | -1.78687100 |
| N  | -3.67035700 | 5.02600800  | -0.92683400 | C | 0.83896100  | -5.71977400 | -2.60003900 |
| C  | -1.85544700 | 3.84793800  | -1.23385800 | C | 1.79386300  | -4.63163500 | -3.08978800 |
| C  | -3.54643100 | 4.14489500  | 0.09399500  | O | 2.63615300  | -4.13297700 | -2.33224000 |
| N  | -2.44994300 | 3.41945100  | -0.06202200 | C | 0.04090500  | -5.23413900 | -1.37316900 |
| C  | 1.77497200  | 3.88903600  | -3.92148900 | C | -0.72694500 | -6.30944900 | -0.61674100 |
| C  | 1.54032700  | 2.89634500  | -2.78108200 | O | -1.92292300 | -6.20204800 | -0.33580200 |
| O  | 2.50632000  | 2.71919700  | -1.95421100 | N | -0.01981700 | -7.40637000 | -0.23271600 |
| O  | 0.41376900  | 2.35740500  | -2.66890500 | N | 1.70087000  | -4.28261500 | -4.39280800 |
| Zn | 2.07460200  | 2.74313400  | 0.08290500  | C | 2.48551300  | -3.18306100 | -4.93963700 |
| Zn | -1.66511600 | 2.18008500  | 1.34013000  | H | 6.07662600  | -4.74780000 | 1.98215900  |
| H  | 3.20384800  | 8.26161900  | -2.41051400 | H | 4.57777900  | -4.19305000 | 2.71480000  |
| H  | 4.31496900  | 8.35082500  | -1.03673500 | H | 7.37954500  | -3.33515300 | 3.58618600  |
| H  | 3.66965000  | 4.66835300  | -1.50481800 | H | 6.83683100  | -2.53532300 | 1.28167400  |
| H  | 1.56124300  | 7.92812600  | 0.08766400  | H | 6.92670900  | -1.19125500 | 2.43658400  |
| H  | 0.51007400  | 5.79226800  | 1.00773400  | H | 5.34729000  | -1.78715900 | 1.88642300  |
| H  | 7.28523300  | 0.74853200  | -1.34791400 | H | 6.21542800  | -1.51024100 | 4.84532800  |
| H  | 7.44931700  | -0.27374800 | 0.08156200  | H | 4.64368300  | -2.19407300 | 4.38952600  |
| H  | 4.65600000  | 1.73861500  | -1.44671700 | H | 5.73592500  | -3.09696900 | 5.45073700  |
| H  | 6.39125900  | 1.32505400  | 2.36010600  | H | 5.23966300  | -5.25582200 | 4.90770800  |
| H  | 4.04202700  | 2.30032800  | 2.65897500  | H | 5.66099000  | -1.38591500 | -1.92167700 |
| H  | -2.73406600 | 3.66890300  | 4.37233500  | H | 5.34986100  | -2.75943700 | -2.96713600 |
| H  | -5.84630400 | 1.43768100  | 4.58322600  | H | 7.88875900  | -3.66369100 | -2.81818100 |
| H  | -5.52540900 | -0.52489800 | 2.96847100  | H | 7.34108600  | -0.46399900 | -3.57610600 |
| H  | -3.64108800 | -0.10820800 | 1.31932000  | H | -0.67905900 | -4.47435800 | -1.67899300 |

|   |             |             |             |   |             |             |             |
|---|-------------|-------------|-------------|---|-------------|-------------|-------------|
| H | 0.74234900  | -4.76079100 | -0.67440400 | H | -1.46724900 | -0.61132500 | -0.99812000 |
| H | 0.98391200  | -7.45858000 | -0.31972500 | H | 2.09470700  | -2.39573300 | -1.67024300 |
| H | -0.48629100 | -8.09408500 | 0.34299600  | O | 0.56140400  | 1.39759700  | -0.18662300 |
| H | 0.15659000  | -6.04823600 | -3.39187200 | H | 0.39443600  | 1.47520700  | -1.17571400 |
| H | 3.54187000  | -3.33603200 | -4.70711500 | H | 0.54109200  | -1.68931200 | 1.23341800  |
| H | 2.16433100  | -2.22297400 | -4.51970300 | C | 1.61712500  | -0.23984400 | 2.35662100  |
| H | 0.89302700  | -4.59345200 | -4.91359600 | H | 2.21424500  | 0.66362400  | 2.24522200  |
| H | 1.46717600  | -6.58194500 | -2.34372000 | H | 0.79082700  | -0.01263700 | 3.03536200  |
| H | 2.35743000  | -3.16512800 | -6.02397200 | H | 2.23642500  | -1.01276100 | 2.82773200  |
| H | 7.03825900  | -1.83608900 | -4.64827300 | C | -1.57727800 | -2.47919200 | -5.30038000 |
| H | 5.74344200  | -0.66967100 | -4.33247900 | C | -2.93575000 | -2.44347900 | -4.62155600 |
| H | 6.79984400  | -5.72453700 | 4.21397500  | O | -3.97819900 | -2.63234800 | -5.24883100 |
| H | 5.30398900  | -6.44462200 | 3.60531500  | N | -2.88340500 | -2.16178700 | -3.29308800 |
| C | -4.69344500 | -4.62347200 | 6.69283200  | C | -4.04435900 | -2.25928300 | -2.43170500 |
| C | -3.16664100 | -4.52680500 | 6.53395900  | C | -4.30745600 | -0.88426600 | -1.80168400 |
| C | -2.76745200 | -3.89512800 | 5.21873800  | O | -3.48285000 | -0.40355100 | -0.99673300 |
| C | -2.43336800 | -2.54023500 | 5.12896900  | C | -3.82786400 | -3.30488300 | -1.32038600 |
| C | -2.78035600 | -4.64296400 | 4.03061000  | O | -3.56279800 | -4.54313600 | -1.93580400 |
| C | -2.13860600 | -1.93965300 | 3.90253000  | N | -5.43022700 | -0.20225300 | -2.11589500 |
| C | -2.49144500 | -4.06629000 | 2.79897900  | C | -6.50500600 | -0.57182400 | -3.07637100 |
| C | -2.17764900 | -2.70174100 | 2.72807700  | C | -6.10790000 | -0.28911000 | -4.53086600 |
| O | -1.92734700 | -2.17892200 | 1.49594100  | C | -7.67401700 | 0.30123500  | -2.58037100 |
| H | -2.73406300 | -5.53291500 | 6.61209700  | C | -6.98907400 | 1.59768100  | -2.11795800 |
| H | -2.75077400 | -3.94579800 | 7.36689300  | C | -5.67812900 | 1.10561000  | -1.48369600 |
| H | -2.40016800 | -1.93721800 | 6.03474600  | H | -4.82888500 | 1.77560000  | -1.65040800 |
| H | -3.02372100 | -5.70297700 | 4.07174600  | H | -5.77209800 | 0.97019900  | -0.39840400 |
| H | -1.86773900 | -0.88745800 | 3.85345700  | H | -6.77972300 | 2.24369600  | -2.97753700 |
| H | -2.49313800 | -4.65557600 | 1.88614400  | H | -7.59786400 | 2.17361600  | -1.41407400 |
| H | -1.66537700 | -1.22648100 | 1.54025000  | H | -8.42428200 | 0.46323300  | -3.35933200 |
| H | -5.15348200 | -3.62889300 | 6.65690800  | H | -8.16986000 | -0.18563400 | -1.73160700 |
| H | -5.13466900 | -5.22204000 | 5.88787300  | H | -6.74337800 | -1.63271100 | -2.96322700 |
| H | -4.96510000 | -5.08848700 | 7.64784500  | H | -5.81227500 | 0.75830400  | -4.66391900 |
| N | -0.45661900 | -0.60571500 | -0.84026000 | H | -5.29175800 | -0.93897400 | -4.85586700 |
| C | 0.30675500  | -1.50627000 | -1.54153900 | H | -6.96525900 | -0.48517900 | -5.18606100 |
| O | -0.17426400 | -2.18348300 | -2.46977000 | H | -4.86767600 | -2.58651000 | -3.06681600 |
| N | 1.61908600  | -1.62523700 | -1.20188000 | H | -3.06466000 | -5.10596100 | -1.30809200 |
| C | 2.19036000  | -1.10127500 | 0.03099000  | H | -4.74341500 | -3.33893500 | -0.70006000 |
| C | 1.08344700  | -0.75926100 | 1.02443900  | H | -3.00985200 | -2.97693500 | -0.66713900 |
| C | 0.00244500  | 0.11015700  | 0.33192600  | H | -1.95772600 | -2.12418100 | -2.86001800 |
| O | -1.03296300 | 0.39339800  | 1.15884100  | H | -1.57683800 | -1.75344200 | -6.12086200 |
| H | 2.81091500  | -0.21980500 | -0.17336500 | H | -0.74936400 | -2.27307500 | -4.62225800 |
| H | 2.84600300  | -1.86848600 | 0.45927300  | H | -1.45324600 | -3.46846100 | -5.75754200 |

**SkDHPase.DHT-TS2-II-D**

|   |            |            |             |   |            |            |             |
|---|------------|------------|-------------|---|------------|------------|-------------|
| C | 3.74936900 | 7.64262400 | -1.62158700 | C | 6.01273200 | 1.32753800 | 0.22659600  |
| C | 2.91708900 | 6.63251700 | -0.91223600 | N | 5.80364700 | 1.58032200 | 1.57263200  |
| N | 1.78795900 | 6.91569800 | -0.15377300 | C | 4.86471500 | 1.72996500 | -0.39360100 |
| C | 3.03254300 | 5.27349000 | -0.86448500 | C | 4.56583200 | 2.09991200 | 1.72591400  |
| C | 1.27551700 | 5.74762500 | 0.31054900  | N | 3.97245000 | 2.19752000 | 0.54760300  |
| N | 2.00665300 | 4.73121200 | -0.11313000 | C | 0.04822400 | 4.86486400 | 4.58558100  |
| C | 7.24244200 | 0.70959900 | -0.30980000 | N | 1.09394500 | 4.26707800 | 3.80431200  |

|    |             |             |             |   |             |             |             |
|----|-------------|-------------|-------------|---|-------------|-------------|-------------|
| C  | 0.82104500  | 3.46772100  | 2.73759700  | H | 2.01740500  | 4.16953300  | 4.19902200  |
| O  | -0.38604900 | 3.46751700  | 2.30824100  | C | 5.71377700  | -5.62566200 | 3.82793700  |
| O  | 1.80477700  | 2.84527500  | 2.23799300  | C | 5.59662500  | -4.49321800 | 2.79978900  |
| C  | -3.79473500 | 3.52000400  | 4.14971100  | C | 6.24753600  | -3.17076600 | 3.25285500  |
| C  | -4.04440900 | 2.19611500  | 3.49450900  | C | 6.27919400  | -2.15686800 | 2.10179900  |
| N  | -3.27334400 | 1.68924000  | 2.44882500  | C | 5.55995100  | -2.56435400 | 4.48562800  |
| C  | -5.03058100 | 1.29008800  | 3.78389700  | C | 6.50572800  | -1.18661600 | -3.95733900 |
| C  | -3.79865500 | 0.51180800  | 2.12031800  | C | 6.04214300  | -2.02818100 | -2.76920400 |
| N  | -4.86132100 | 0.24043400  | 2.90263700  | S | 7.40990500  | -2.90070200 | -1.89051300 |
| C  | -2.43506700 | 5.68110500  | -2.92705500 | C | 0.77314900  | -5.62670600 | -2.61169000 |
| C  | -2.61437100 | 4.85750400  | -1.69863500 | C | 1.73251600  | -4.56419800 | -3.14429300 |
| N  | -3.72495800 | 4.91584100  | -0.86868600 | O | 2.60508400  | -4.07104600 | -2.41796500 |
| C  | -1.80149000 | 3.91860200  | -1.12601500 | C | 0.01302300  | -5.10425900 | -1.37502400 |
| C  | -3.55049800 | 4.03422500  | 0.14590500  | C | -0.72185200 | -6.16860800 | -0.57203400 |
| N  | -2.38732700 | 3.41735900  | 0.01834500  | O | -1.92758500 | -6.10790500 | -0.32079700 |
| C  | 1.70616400  | 3.91641500  | -3.88226800 | N | 0.03074000  | -7.20769100 | -0.11855600 |
| C  | 1.57717400  | 2.88637600  | -2.77280900 | N | 1.60694900  | -4.22757500 | -4.44811800 |
| O  | 2.52541200  | 2.70755300  | -1.97362700 | C | 2.38868000  | -3.13999700 | -5.02127700 |
| O  | 0.43311500  | 2.30037200  | -2.66283500 | H | 6.06846100  | -4.81125800 | 1.86052100  |
| Zn | 2.04997300  | 2.68701800  | 0.23728100  | H | 4.53694900  | -4.31237100 | 2.56467100  |
| Zn | -1.53352400 | 2.15320600  | 1.36836200  | H | 7.29039400  | -3.39551200 | 3.52551300  |
| H  | 3.17398200  | 8.19789500  | -2.37294600 | H | 6.78814400  | -2.56752500 | 1.22219000  |
| H  | 4.18947500  | 8.37585300  | -0.93425300 | H | 6.80742300  | -1.24202400 | 2.40344900  |
| H  | 3.76235100  | 4.64373700  | -1.34453900 | H | 5.26257000  | -1.87133300 | 1.79889400  |
| H  | 1.41258000  | 7.83561400  | 0.03228300  | H | 6.04754100  | -1.62877700 | 4.78776400  |
| H  | 0.39692500  | 5.67163100  | 0.93407100  | H | 4.50581000  | -2.33788900 | 4.27423600  |
| H  | 7.19820200  | 0.67873100  | -1.40091800 | H | 5.58848700  | -3.23851900 | 5.34744300  |
| H  | 7.37815400  | -0.31894700 | 0.04333700  | H | 5.17230200  | -5.40059400 | 4.75305300  |
| H  | 4.60581700  | 1.70995100  | -1.44031900 | H | 5.59307500  | -1.39474700 | -1.99688900 |
| H  | 6.45161800  | 1.37038500  | 2.31947300  | H | 5.27867300  | -2.75858700 | -3.05273400 |
| H  | 4.11757700  | 2.37020800  | 2.66796300  | H | 7.81500600  | -3.66352500 | -2.92877300 |
| H  | -2.79618600 | 3.56113900  | 4.59795100  | H | 7.25699100  | -0.44944500 | -3.65534800 |
| H  | -5.81527500 | 1.30122900  | 4.52441800  | H | -0.71965900 | -4.35649300 | -1.68033300 |
| H  | -5.38187000 | -0.62601200 | 2.89035300  | H | 0.73527600  | -4.61124500 | -0.71240900 |
| H  | -3.45022200 | -0.13396800 | 1.32618100  | H | 1.03789700  | -7.20836400 | -0.18036300 |
| H  | -1.49744000 | 5.40368100  | -3.41473600 | H | -0.41130100 | -7.88549400 | 0.48736900  |
| H  | -3.24292000 | 5.52155300  | -3.65167400 | H | 0.06595700  | -5.95877500 | -3.37975900 |
| H  | -0.86592500 | 3.54018500  | -1.50197100 | H | 3.44882300  | -3.30347000 | -4.81501500 |
| H  | -4.54021400 | 5.49773800  | -1.00566400 | H | 2.08784900  | -2.17443500 | -4.59864800 |
| H  | -4.27199200 | 3.86314500  | 0.92997600  | H | 0.77117300  | -4.51755700 | -4.93604100 |
| H  | -0.67605800 | 5.35166200  | 3.92957300  | H | 1.39129500  | -6.49456500 | -2.35104700 |
| H  | 0.98244800  | 3.73555400  | -4.67962200 | H | 2.23331100  | -3.12681700 | -6.10222700 |
| H  | 1.51815200  | 4.90502600  | -3.44616700 | H | 6.95220100  | -1.81272200 | -4.73784700 |
| H  | 8.14325500  | 1.27318000  | -0.03458800 | H | 5.65456000  | -0.65521400 | -4.40210100 |
| H  | -3.86029000 | 4.34914900  | 3.43417900  | H | 6.76224800  | -5.81181300 | 4.09128500  |
| H  | -4.53083300 | 3.69771000  | 4.93851200  | H | 5.30347800  | -6.56068300 | 3.42990200  |
| H  | 0.48024600  | 5.62106100  | 5.24771800  | C | -4.70671800 | -4.75091600 | 6.64006400  |
| H  | -0.49159800 | 4.13570900  | 5.20669600  | C | -3.18192200 | -4.60425600 | 6.49440100  |
| H  | 4.57006300  | 7.13866700  | -2.13779600 | C | -2.77367900 | -3.95480300 | 5.18892200  |
| H  | 2.72168700  | 3.91924300  | -4.28568000 | C | -2.38965500 | -2.61160000 | 5.12409100  |
| H  | -2.39739500 | 6.75510100  | -2.70427500 | C | -2.80203700 | -4.67959900 | 3.98637500  |

|   |             |             |             |   |             |             |             |
|---|-------------|-------------|-------------|---|-------------|-------------|-------------|
| C | -2.05529800 | -2.00163000 | 3.91162500  | C | -1.67466800 | -2.41912200 | -5.33968500 |
| C | -2.47597800 | -4.09321300 | 2.76860200  | C | -3.01608300 | -2.37750900 | -4.62859800 |
| C | -2.10380900 | -2.74135500 | 2.72286700  | O | -4.07287700 | -2.57921400 | -5.22788300 |
| O | -1.80964700 | -2.21351700 | 1.50323500  | N | -2.93262600 | -2.08002700 | -3.30551700 |
| H | -2.72056500 | -5.59768300 | 6.57439100  | C | -4.07302800 | -2.17819900 | -2.41693500 |
| H | -2.79288200 | -4.01639600 | 7.33543900  | C | -4.33444000 | -0.79943000 | -1.79551500 |
| H | -2.34357900 | -2.02506200 | 6.04010800  | O | -3.50133900 | -0.30496500 | -1.00967600 |
| H | -3.08427800 | -5.73068200 | 4.00472400  | C | -3.82466700 | -3.21201200 | -1.30193700 |
| H | -1.74323100 | -0.96017100 | 3.88573500  | O | -3.57175800 | -4.45416800 | -1.91462800 |
| H | -2.48969600 | -4.66742500 | 1.84644400  | N | -5.46793600 | -0.12764100 | -2.09913100 |
| H | -1.52613100 | -1.26423100 | 1.55484800  | C | -6.55694800 | -0.51244000 | -3.03684900 |
| H | -5.19866100 | -3.77160200 | 6.60766700  | C | -6.19305900 | -0.22947400 | -4.50023600 |
| H | -5.12333900 | -5.35802900 | 5.82840100  | C | -7.72606600 | 0.34743800  | -2.51877000 |
| H | -4.96900700 | -5.23132500 | 7.58993100  | C | -7.04768300 | 1.65408600  | -2.07551000 |
| N | -0.42038500 | -0.50855500 | -0.89866800 | C | -5.71633500 | 1.18066400  | -1.46945400 |
| C | 0.31423800  | -1.37953700 | -1.65352700 | H | -4.87947900 | 1.85985800  | -1.66086900 |
| O | -0.19660100 | -2.04489000 | -2.57764400 | H | -5.78143300 | 1.05087500  | -0.38134200 |
| N | 1.64690700  | -1.49149500 | -1.38082500 | H | -6.86649300 | 2.29982200  | -2.94176500 |
| C | 2.25070300  | -1.02516500 | -0.13925500 | H | -7.64833700 | 2.22422400  | -1.35990600 |
| C | 1.17453000  | -0.74462200 | 0.90487300  | H | -8.49553300 | 0.49739400  | -3.28126300 |
| C | 0.07650100  | 0.17210900  | 0.29455500  | H | -8.19643400 | -0.14243100 | -1.65741600 |
| O | -0.95236500 | 0.35350300  | 1.18081300  | H | -6.78028200 | -1.57577500 | -2.91681600 |
| H | 2.85411400  | -0.12680400 | -0.31871000 | H | -5.90990500 | 0.82030700  | -4.64225500 |
| H | 2.93039700  | -1.80447100 | 0.22543000  | H | -5.37761900 | -0.87328900 | -4.83888500 |
| H | -1.43363100 | -0.51160500 | -1.02557500 | H | -7.06155700 | -0.43561300 | -5.13740500 |
| H | 2.08831800  | -2.27817500 | -1.85404700 | H | -4.90698700 | -2.51889200 | -3.03072500 |
| O | 0.55110000  | 1.47556600  | -0.13095200 | H | -3.07155500 | -5.01838400 | -1.28937900 |
| H | 0.43462100  | 1.74032500  | -1.46987500 | H | -4.72448900 | -3.24370700 | -0.65864300 |
| H | 0.63961600  | -1.68641600 | 1.07636500  | H | -2.99121700 | -2.87684900 | -0.67188000 |
| C | 1.74942200  | -0.30745600 | 2.24931200  | H | -1.99627400 | -2.02215100 | -2.89625400 |
| H | 2.38866800  | 0.57021300  | 2.16912600  | H | -1.71006400 | -1.73539400 | -6.19465100 |
| H | 0.94352800  | -0.07092200 | 2.94884400  | H | -0.83493300 | -2.16636000 | -4.69273100 |
| H | 2.34078800  | -1.12550800 | 2.67854900  | H | -1.54166600 | -3.42720000 | -5.75176700 |

#### **SkDHPase.DHT-INT2-II-D**

|   |             |            |             |   |             |            |             |
|---|-------------|------------|-------------|---|-------------|------------|-------------|
| C | 4.10460800  | 7.45876200 | -1.60107100 | O | 2.02972800  | 2.74240500 | 2.28321900  |
| C | 3.23877500  | 6.46028100 | -0.91101600 | C | -3.56646600 | 3.67138100 | 4.23226600  |
| N | 2.12751600  | 6.77737300 | -0.13974600 | C | -3.86465500 | 2.36394200 | 3.56425900  |
| C | 3.29623900  | 5.09516900 | -0.88588900 | N | -3.11650700 | 1.84086000 | 2.50921900  |
| C | 1.56843200  | 5.62609700 | 0.30959300  | C | -4.88244800 | 1.49162900 | 3.84760600  |
| N | 2.25182900  | 4.58458000 | -0.13568100 | C | -3.68744800 | 0.68772800 | 2.16933300  |
| C | 7.25523700  | 0.34451800 | -0.39675600 | N | -4.75656600 | 0.44718600 | 2.95276400  |
| C | 6.08461200  | 1.04954600 | 0.15972800  | C | -2.18803000 | 5.82753300 | -2.84238000 |
| N | 5.93370200  | 1.35934000 | 1.50118000  | C | -2.39364600 | 4.98320700 | -1.63234400 |
| C | 4.93789900  | 1.48452400 | -0.43833600 | N | -3.59135000 | 4.89052000 | -0.93794600 |
| C | 4.72672100  | 1.94154900 | 1.67397800  | C | -1.54374400 | 4.14307500 | -0.96797800 |
| N | 4.09864300  | 2.02550200 | 0.51192500  | C | -3.42951100 | 4.01839700 | 0.08683400  |
| C | 0.34540500  | 4.81439200 | 4.62943100  | N | -2.19321100 | 3.54991400 | 0.09370200  |
| N | 1.37089200  | 4.16113500 | 3.87021900  | C | 1.84517800  | 3.86319800 | -3.86755200 |
| C | 1.07512600  | 3.41535700 | 2.77428100  | C | 1.73654800  | 2.82973800 | -2.76879900 |
| O | -0.11434400 | 3.50975700 | 2.30598300  | O | 2.70708500  | 2.52408100 | -2.06738300 |



|    |             |             |             |   |             |             |             |
|----|-------------|-------------|-------------|---|-------------|-------------|-------------|
| O  | 0.52639600  | 2.36435600  | -2.56568600 | H | 5.86591300  | -5.11504400 | 1.75329900  |
| Zn | 2.17192700  | 2.55016300  | 0.28800400  | H | 4.33449400  | -4.58869800 | 2.43674800  |
| Zn | -1.36081100 | 2.24398300  | 1.41403300  | H | 7.09228000  | -3.74324600 | 3.44882100  |
| H  | 3.54441500  | 8.05392600  | -2.33291700 | H | 6.63440600  | -2.87448900 | 1.15159800  |
| H  | 4.57399100  | 8.15615400  | -0.89628500 | H | 6.65769500  | -1.56276800 | 2.34980300  |
| H  | 4.00002900  | 4.44126800  | -1.37359000 | H | 5.11304800  | -2.16120800 | 1.71745900  |
| H  | 1.79461600  | 7.70943300  | 0.06634100  | H | 5.86857100  | -1.96903600 | 4.71992100  |
| H  | 0.69256900  | 5.57680500  | 0.93995500  | H | 4.32013200  | -2.64104700 | 4.17896600  |
| H  | 7.16873700  | 0.28085900  | -1.48381900 | H | 5.37202300  | -3.57727700 | 5.25255900  |
| H  | 7.34302800  | -0.67884600 | -0.01429100 | H | 4.90234000  | -5.71792200 | 4.62136300  |
| H  | 4.64885000  | 1.43845000  | -1.47562800 | H | 5.43462300  | -1.66075600 | -2.10131400 |
| H  | 6.59681600  | 1.14817200  | 2.23423800  | H | 5.06182400  | -2.99421300 | -3.17721500 |
| H  | 4.32111300  | 2.26123900  | 2.61969900  | H | 7.54088900  | -4.03526900 | -3.03718900 |
| H  | -2.56844900 | 3.67100000  | 4.68391600  | H | 7.16192400  | -0.78307600 | -3.73355000 |
| H  | -5.66280900 | 1.52309900  | 4.59213700  | H | -0.25887200 | -4.14600400 | -0.76638400 |
| H  | -5.30679800 | -0.40059600 | 2.93358300  | H | 1.08918400  | -5.28751700 | -0.66575100 |
| H  | -3.37005300 | 0.03855900  | 1.36526400  | H | 0.66404500  | -7.42701000 | 0.08212300  |
| H  | -1.16752800 | 5.69417800  | -3.20961000 | H | -0.93818900 | -7.98018700 | 0.46632200  |
| H  | -2.86903900 | 5.54905500  | -3.65585200 | H | -0.84252400 | -4.89978100 | -3.00061900 |
| H  | -0.52911900 | 3.88930400  | -1.21824200 | H | 3.15446100  | -3.62241100 | -4.95253200 |
| H  | -4.44966200 | 5.37347900  | -1.16625300 | H | 2.12151900  | -2.21112600 | -4.62038400 |
| H  | -4.20872600 | 3.74979400  | 0.78329700  | H | 0.25157700  | -4.12904000 | -4.88656600 |
| H  | -0.32809300 | 5.35267200  | 3.96005600  | H | 0.23569800  | -6.29612400 | -2.89563600 |
| H  | 1.05206400  | 3.74631400  | -4.60900300 | H | 1.93394900  | -3.12133300 | -6.14476300 |
| H  | 1.75895300  | 4.85492700  | -3.40756500 | H | 6.79729900  | -2.11634400 | -4.83471600 |
| H  | 8.19769800  | 0.86093600  | -0.17297300 | H | 5.55803500  | -0.89731500 | -4.49705800 |
| H  | -3.59966300 | 4.50670700  | 3.52188000  | H | 6.49627000  | -6.15530600 | 3.98667200  |
| H  | -4.29717500 | 3.86977700  | 5.02114600  | H | 5.03584800  | -6.86494600 | 3.28688400  |
| H  | 0.80441400  | 5.53468000  | 5.31326900  | C | -4.86817900 | -4.56560900 | 6.66112300  |
| H  | -0.25645700 | 4.11429300  | 5.22658200  | C | -3.34173800 | -4.47598300 | 6.48222700  |
| H  | 4.90404300  | 6.94028100  | -2.13596500 | C | -2.92036900 | -3.82909800 | 5.17800500  |
| H  | 2.82501100  | 3.80063300  | -4.34581300 | C | -2.44380700 | -2.51486500 | 5.12883500  |
| H  | -2.33675200 | 6.89490400  | -2.63525600 | C | -3.00659300 | -4.53040300 | 3.96394500  |
| H  | 2.27252200  | 3.98930000  | 4.28933500  | C | -2.07071400 | -1.91204600 | 3.92366300  |
| C  | 5.45751300  | -5.94362700 | 3.70454700  | C | -2.64367500 | -3.95029800 | 2.75310800  |
| C  | 5.38531800  | -4.79694000 | 2.68809900  | C | -2.17239200 | -2.62880700 | 2.72404100  |
| C  | 6.05730000  | -3.49431500 | 3.16706800  | O | -1.83839400 | -2.10833400 | 1.51116900  |
| C  | 6.12097300  | -2.46622900 | 2.02981500  | H | -2.91955400 | -5.48813000 | 6.54338600  |
| C  | 5.36685700  | -2.89100600 | 4.39983000  | H | -2.91318900 | -3.91518500 | 7.32255800  |
| C  | 6.37641600  | -1.47688500 | -4.05087200 | H | -2.35053700 | -1.94662800 | 6.05277000  |
| C  | 5.85845400  | -2.30720400 | -2.87718600 | H | -3.36095200 | -5.55959100 | 3.96745700  |
| S  | 7.17108200  | -3.25856000 | -1.99606400 | H | -1.68428700 | -0.89558000 | 3.91247600  |
| C  | 0.10924100  | -5.24879500 | -2.58674800 | H | -2.70095000 | -4.50869500 | 1.82287200  |
| C  | 1.27862900  | -4.45041800 | -3.16624200 | H | -1.50046500 | -1.17632700 | 1.57041600  |
| O  | 2.29039200  | -4.18346600 | -2.50493100 | H | -5.32307100 | -3.56804200 | 6.65295000  |
| C  | 0.07498000  | -5.14706400 | -1.05144000 | H | -5.32712000 | -5.14583100 | 5.85253200  |
| C  | -0.89186200 | -6.14436400 | -0.43522700 | H | -5.12544200 | -5.04841000 | 7.61099400  |
| O  | -2.11253900 | -5.97031700 | -0.39332400 | N | -0.44031800 | -0.43539900 | -0.90856100 |
| N  | -0.33324300 | -7.27944700 | 0.06018200  | C | 0.22064700  | -1.35426300 | -1.66865700 |
| N  | 1.17244800  | -4.09982500 | -4.47103600 | O | -0.35557800 | -2.02849100 | -2.54944500 |
| C  | 2.15176700  | -3.20768200 | -5.07782000 | N | 1.56359300  | -1.50851900 | -1.45864300 |

|   |             |             |             |   |             |             |             |
|---|-------------|-------------|-------------|---|-------------|-------------|-------------|
| C | 2.22497500  | -1.08274600 | -0.23029300 | N | -5.55655700 | 0.05802100  | -2.05458700 |
| C | 1.19469300  | -0.75981100 | 0.84593600  | C | -6.62767000 | -0.25070800 | -3.03951800 |
| C | 0.13832700  | 0.23269200  | 0.27328100  | C | -6.23371600 | 0.14078800  | -4.47075600 |
| O | -0.86739300 | 0.42888600  | 1.19597900  | C | -7.80403200 | 0.57165400  | -2.47948600 |
| H | 2.86222200  | -0.21125100 | -0.42170300 | C | -7.13164400 | 1.84323500  | -1.93558800 |
| H | 2.87924200  | -1.89591000 | 0.10634100  | C | -5.80171800 | 1.33083800  | -1.35658600 |
| H | -1.45804500 | -0.42652600 | -0.97617500 | H | -4.96375900 | 2.01860100  | -1.51176900 |
| H | 1.94021900  | -2.33392700 | -1.91960100 | H | -5.86486700 | 1.14275300  | -0.27699100 |
| O | 0.64264600  | 1.48783500  | -0.17269700 | H | -6.94763300 | 2.55173000  | -2.75091100 |
| H | 0.61340000  | -1.67291400 | 1.01975800  | H | -7.73895200 | 2.35751300  | -1.18421500 |
| C | 1.82964700  | -0.38176000 | 2.18164700  | H | -8.56268500 | 0.77684800  | -3.23998900 |
| H | 2.55594900  | 0.42484000  | 2.09347600  | H | -8.28654300 | 0.02180000  | -1.66234600 |
| H | 1.06176800  | -0.06473500 | 2.89176900  | H | -6.85599200 | -1.31889600 | -3.00718800 |
| H | 2.34312100  | -1.25436700 | 2.60364400  | H | -5.92963100 | 1.19278700  | -4.52457900 |
| H | 0.50893900  | 1.82101200  | -1.66927400 | H | -5.42454100 | -0.49234000 | -4.84194500 |
| C | -1.84411900 | -2.26826000 | -5.38894400 | H | -7.09322500 | 0.00050500  | -5.13712200 |
| C | -3.17489900 | -2.16474700 | -4.66372200 | H | -5.03929400 | -2.31409000 | -3.04721600 |
| O | -4.24521600 | -2.30797500 | -5.25543600 | H | -3.16127100 | -4.86953000 | -1.42565000 |
| N | -3.06337800 | -1.88703400 | -3.33873000 | H | -4.81973700 | -3.13981200 | -0.71435900 |
| C | -4.19215300 | -2.00145500 | -2.43647800 | H | -3.08900200 | -2.76280200 | -0.73206800 |
| C | -4.43617100 | -0.64445700 | -1.76275900 | H | -2.12310500 | -1.89630900 | -2.93164300 |
| O | -3.60901500 | -0.19615400 | -0.94547100 | H | -1.85568500 | -1.59228400 | -6.25047500 |
| C | -3.92785900 | -3.07746400 | -1.36591000 | H | -0.98999100 | -2.04280700 | -4.74901700 |
| O | -3.67546700 | -4.29422900 | -2.02856400 | H | -1.75956000 | -3.28495900 | -5.79360700 |

#### **SkDHPase.DHT-TS3-II-D**

|   |             |            |             |    |             |             |             |
|---|-------------|------------|-------------|----|-------------|-------------|-------------|
| C | 3.68277500  | 7.61017000 | -1.60971700 | N  | -3.60511700 | 5.02030100  | -0.65451600 |
| C | 2.87441300  | 6.59409600 | -0.89068300 | C  | -1.81368800 | 3.83983800  | -1.06539300 |
| N | 1.87652000  | 6.87978900 | 0.03044100  | C  | -3.39825300 | 4.16557400  | 0.37659800  |
| C | 2.90405700  | 5.23168700 | -0.95986800 | N  | -2.31487200 | 3.44165400  | 0.15774500  |
| C | 1.35561200  | 5.70938300 | 0.47661400  | C  | 1.64737800  | 3.86465300  | -3.84540600 |
| N | 1.95603500  | 4.69189300 | -0.11438400 | C  | 1.45704800  | 2.72940300  | -2.82553200 |
| C | 7.23483100  | 0.70468200 | -0.31110100 | O  | 2.35039000  | 2.52317300  | -1.96894000 |
| C | 5.97647400  | 1.28819500 | 0.20445000  | O  | 0.34423500  | 2.08715600  | -2.89550400 |
| N | 5.72773900  | 1.47966100 | 1.55391000  | Zn | 1.99001100  | 2.66662900  | 0.22541700  |
| C | 4.84133700  | 1.71303800 | -0.42754100 | Zn | -1.43512100 | 2.06028700  | 1.39930900  |
| C | 4.48394200  | 1.98645900 | 1.69729900  | H  | 3.06409900  | 8.27042000  | -2.23075700 |
| N | 3.91929900  | 2.13419700 | 0.50949200  | H  | 4.25643500  | 8.24585700  | -0.92348400 |
| C | 0.05177100  | 4.82075300 | 4.63355200  | H  | 3.52786400  | 4.59673600  | -1.56678700 |
| N | 1.11267900  | 4.39972500 | 3.76291000  | H  | 1.59113400  | 7.80189700  | 0.33042900  |
| C | 0.87067500  | 3.39937300 | 2.85985600  | H  | 0.57688300  | 5.63963800  | 1.22045600  |
| O | -0.35908300 | 3.10934500 | 2.68369900  | H  | 7.23010900  | 0.70926700  | -1.40372800 |
| O | 1.88816600  | 2.91286900 | 2.28258200  | H  | 7.37507700  | -0.33231600 | 0.01411000  |
| C | -3.78510000 | 3.44811800 | 4.23199700  | H  | 4.60865000  | 1.73362600  | -1.48081500 |
| C | -4.03617400 | 2.14846000 | 3.52356400  | H  | 6.35603900  | 1.24008400  | 2.30852000  |
| N | -3.23863900 | 1.64035500 | 2.49702600  | H  | 4.01159800  | 2.22309500  | 2.63651300  |
| C | -5.06383800 | 1.26958300 | 3.75048100  | H  | -2.78281300 | 3.47009600  | 4.67233900  |
| C | -3.79158600 | 0.49271600 | 2.12066800  | H  | -5.87714400 | 1.29056300  | 4.45943700  |
| N | -4.89567100 | 0.23582500 | 2.85155300  | H  | -5.44363500 | -0.61184500 | 2.79862800  |
| C | -2.49819400 | 5.60256300 | -2.86039000 | H  | -3.42041700 | -0.14756400 | 1.33325400  |
| C | -2.60082400 | 4.82878500 | -1.59259200 | H  | -1.65946200 | 5.22509700  | -3.45062900 |

|   |             |             |             |   |             |             |             |
|---|-------------|-------------|-------------|---|-------------|-------------|-------------|
| H | -3.40194300 | 5.50883600  | -3.47509100 | H | 0.18682200  | -6.01481200 | -3.17186600 |
| H | -0.95141000 | 3.36064200  | -1.50212700 | H | 3.42757600  | -3.22513000 | -4.70474900 |
| H | -4.37535000 | 5.67018100  | -0.73394100 | H | 1.94791300  | -2.23049600 | -4.65541500 |
| H | -4.04696800 | 4.08815400  | 1.23520200  | H | 0.90571600  | -4.73076200 | -4.84485300 |
| H | -0.79133600 | 5.20007400  | 4.05135500  | H | 1.49183600  | -6.41851200 | -2.05359400 |
| H | 0.99758400  | 3.72709100  | -4.71191500 | H | 2.27488700  | -3.28436800 | -6.05808600 |
| H | 1.40046000  | 4.81441400  | -3.35782500 | H | 6.90264400  | -1.83692800 | -4.73818500 |
| H | 8.11569300  | 1.27316300  | 0.01394300  | H | 5.61991500  | -0.67225100 | -4.37056200 |
| H | -3.85706400 | 4.30896400  | 3.55520400  | H | 6.83797500  | -5.83661000 | 4.07857400  |
| H | -4.51796300 | 3.58947000  | 5.03108100  | H | 5.34203400  | -6.56084600 | 3.47592500  |
| H | 0.41509900  | 5.62844200  | 5.27680100  | C | -4.61888800 | -4.82329700 | 6.74800700  |
| H | -0.32177400 | 4.01084400  | 5.27510000  | C | -3.12192200 | -4.58828600 | 6.46817700  |
| H | 4.39619000  | 7.10931100  | -2.26880700 | C | -2.81399100 | -3.97080100 | 5.11551600  |
| H | 2.69287100  | 3.91071200  | -4.15998900 | C | -2.34851000 | -2.65656500 | 4.99585800  |
| H | -2.33035900 | 6.67207400  | -2.67967800 | C | -2.96155200 | -4.70856900 | 3.92857500  |
| H | 2.06985000  | 4.48144800  | 4.07382200  | C | -2.03055900 | -2.09396600 | 3.75505900  |
| C | 5.78426600  | -5.63167400 | 3.85300000  | C | -2.65400500 | -4.16882100 | 2.68334200  |
| C | 5.65081000  | -4.50239800 | 2.82333000  | C | -2.17420500 | -2.85262600 | 2.58568900  |
| C | 6.34379000  | -3.19064400 | 3.24350600  | O | -1.87111800 | -2.38561000 | 1.34244300  |
| C | 6.34181100  | -2.18113800 | 2.08840200  | H | -2.59690500 | -5.54978500 | 6.55385700  |
| C | 5.72109400  | -2.56918400 | 4.50287900  | H | -2.70783300 | -3.94722900 | 7.25674500  |
| C | 6.48177600  | -1.20489200 | -3.94827500 | H | -2.21518500 | -2.05517200 | 5.89343800  |
| C | 6.05090700  | -2.03760400 | -2.74212100 | H | -3.31903400 | -5.73544700 | 3.98025500  |
| S | 7.43978700  | -2.91203100 | -1.89988500 | H | -1.65830200 | -1.07430400 | 3.69414700  |
| C | 0.86704900  | -5.59637300 | -2.42172900 | H | -2.76792500 | -4.75275600 | 1.77409200  |
| C | 1.79556400  | -4.54750900 | -3.02124300 | H | -1.58627500 | -1.43077000 | 1.33039000  |
| O | 2.62279200  | -3.95244800 | -2.31598800 | H | -5.17597800 | -3.87932400 | 6.72918800  |
| C | 0.06410900  | -4.97015200 | -1.26034800 | H | -5.06432800 | -5.48606200 | 5.99737900  |
| C | -0.83585300 | -5.96774200 | -0.54479600 | H | -4.76299000 | -5.28394900 | 7.73184800  |
| O | -2.06298500 | -5.93437600 | -0.61304700 | N | -0.21531000 | -0.00412000 | -1.32779700 |
| N | -0.19486700 | -6.93751900 | 0.16513600  | C | 0.45075300  | -1.11380500 | -1.94576900 |
| N | 1.66721300  | -4.29771900 | -4.34195600 | O | -0.10374000 | -1.76642900 | -2.83507900 |
| C | 2.36997400  | -3.18939100 | -4.97430300 | N | 1.71972900  | -1.33098600 | -1.55058000 |
| H | 6.08028600  | -4.83441700 | 1.86868200  | C | 2.23675000  | -0.82224100 | -0.28256100 |
| H | 4.58656800  | -4.30118200 | 2.62803600  | C | 1.09158000  | -0.68647100 | 0.71731000  |
| H | 7.39358300  | -3.43272300 | 3.47040100  | C | 0.03332400  | 0.32637400  | 0.21147200  |
| H | 6.80351100  | -2.60293400 | 1.18824000  | O | -1.13483200 | 0.17923700  | 0.89631400  |
| H | 6.90036100  | -1.27567700 | 2.36224900  | H | 2.74937400  | 0.12960900  | -0.43857600 |
| H | 5.31735600  | -1.87862800 | 1.83083000  | H | 2.97955900  | -1.54130500 | 0.07742500  |
| H | 6.23367100  | -1.63844300 | 4.77716400  | H | -1.23529400 | -0.12430400 | -1.44759600 |
| H | 4.66115400  | -2.33094500 | 4.33862600  | H | 2.14015300  | -2.18206800 | -1.92996400 |
| H | 5.78093200  | -3.23886800 | 5.36650000  | O | 0.37373500  | 1.65853800  | 0.22554400  |
| H | 5.28184600  | -5.39121200 | 4.79604600  | H | 0.57605700  | -1.65539500 | 0.72956000  |
| H | 5.62846800  | -1.39702700 | -1.96077700 | C | 1.55777000  | -0.39743100 | 2.14513700  |
| H | 5.27569300  | -2.76573500 | -2.99855500 | H | 2.02760400  | 0.58208500  | 2.23910500  |
| H | 7.81001100  | -3.68199100 | -2.94589200 | H | 0.70536000  | -0.42065800 | 2.82953900  |
| H | 7.24420600  | -0.46903100 | -3.67262100 | H | 2.26834900  | -1.16608600 | 2.47249500  |
| H | -0.57150300 | -4.16670800 | -1.63765300 | H | 0.13468500  | 1.11289900  | -2.07787400 |
| H | 0.77227500  | -4.53097400 | -0.54846900 | C | -1.67206600 | -2.48716800 | -5.31373400 |
| H | 0.79278900  | -6.88745400 | 0.36661800  | C | -3.00753300 | -2.54884500 | -4.59461800 |
| H | -0.75859200 | -7.57571200 | 0.71044500  | O | -4.06563400 | -2.70060100 | -5.20186100 |

|   |             |             |             |   |             |             |             |
|---|-------------|-------------|-------------|---|-------------|-------------|-------------|
| N | -2.92305000 | -2.39356800 | -3.24044800 | H | -7.22248500 | 2.57523300  | -1.51005300 |
| C | -4.10237400 | -2.18601300 | -2.42192600 | H | -8.34050300 | 0.74790900  | -3.18695300 |
| C | -4.15742100 | -0.72188400 | -1.97038900 | H | -7.99485000 | 0.25503500  | -1.52224900 |
| O | -3.17714200 | -0.20857100 | -1.39937700 | H | -6.79157700 | -1.42772500 | -2.67751300 |
| C | -4.13150900 | -3.09962900 | -1.17293900 | H | -5.86428000 | 0.67931700  | -4.72051400 |
| O | -4.29537500 | -4.44673200 | -1.53757500 | H | -5.44100300 | -1.04976700 | -4.75437300 |
| N | -5.30140700 | -0.02146700 | -2.13515300 | H | -7.11376800 | -0.54591600 | -5.00632400 |
| C | -6.48792300 | -0.41012500 | -2.93973900 | H | -4.95075400 | -2.45911900 | -3.04652400 |
| C | -6.19868800 | -0.32720500 | -4.44230100 | H | -3.45804400 | -4.91879500 | -1.37282600 |
| C | -7.53939200 | 0.60691800  | -2.45595800 | H | -4.99490100 | -2.79119500 | -0.55995800 |
| C | -6.72271100 | 1.88427800  | -2.19617400 | H | -3.23271400 | -2.92911400 | -0.56899300 |
| C | -5.39477800 | 1.35789100  | -1.62730200 | H | -2.01714600 | -2.11742000 | -2.86637100 |
| H | -4.52080300 | 1.93776800  | -1.93879700 | H | -1.34152000 | -1.44536700 | -5.39152200 |
| H | -5.39386100 | 1.34035600  | -0.52939200 | H | -0.89103400 | -3.02608600 | -4.77485400 |
| H | -6.54904000 | 2.42139900  | -3.13515500 | H | -1.80190500 | -2.89337200 | -6.31904400 |

### **SkDHPase.DHT-EP-II-D**

|    |             |            |             |    |             |             |             |
|----|-------------|------------|-------------|----|-------------|-------------|-------------|
| C  | 4.17402800  | 7.46919000 | -1.87606400 | Zn | -1.52637300 | 2.39251500  | 1.37321000  |
| C  | 3.32318600  | 6.54623700 | -1.08050000 | H  | 3.57838700  | 8.15016400  | -2.49704800 |
| N  | 2.38540900  | 6.93913500 | -0.13518000 | H  | 4.82595000  | 8.08447600  | -1.24319900 |
| C  | 3.24621600  | 5.18425500 | -1.09988100 | H  | 3.78445300  | 4.48147100  | -1.71357400 |
| C  | 1.79270000  | 5.82782000 | 0.37060700  | H  | 2.17754800  | 7.89050400  | 0.13582100  |
| N  | 2.29082400  | 4.74638100 | -0.20256700 | H  | 1.03116700  | 5.84591600  | 1.13502600  |
| C  | 7.32392800  | 0.42509700 | -0.31143400 | H  | 7.33052600  | 0.39553400  | -1.40355800 |
| C  | 6.05726600  | 1.03845400 | 0.17220100  | H  | 7.45068800  | -0.60208500 | 0.04759500  |
| N  | 5.80555300  | 1.29002500 | 1.51309200  | H  | 4.69868200  | 1.46181000  | -1.53314600 |
| C  | 4.93035000  | 1.46583300 | -0.47912000 | H  | 6.42286200  | 1.05974300  | 2.27975800  |
| C  | 4.57474800  | 1.83653200 | 1.63084500  | H  | 4.10994400  | 2.12544300  | 2.55979100  |
| N  | 4.01661500  | 1.95253700 | 0.43708000  | H  | -2.48023300 | 3.92966900  | 4.37809800  |
| C  | 0.37501300  | 5.12057100 | 4.44809000  | H  | -5.76894700 | 1.95877800  | 4.57615100  |
| N  | 1.33525300  | 4.45768400 | 3.59983800  | H  | -5.61593300 | -0.01392400 | 2.94955800  |
| C  | 0.94552100  | 3.53045600 | 2.67280600  | H  | -3.70766700 | 0.24182300  | 1.30322800  |
| O  | -0.31784500 | 3.48355500 | 2.44836100  | H  | -1.28263200 | 5.32242500  | -3.63811700 |
| O  | 1.85772900  | 2.85776900 | 2.11108100  | H  | -2.98760000 | 5.77622600  | -3.73620800 |
| C  | -3.53281900 | 3.95442200 | 4.07946700  | H  | -0.83888000 | 3.37263000  | -1.68915600 |
| C  | -3.95070400 | 2.64721600 | 3.47254700  | H  | -4.08075100 | 5.97782800  | -1.06010400 |
| N  | -3.27997300 | 2.04396600 | 2.40938900  | H  | -3.98352800 | 4.38428200  | 0.92125700  |
| C  | -5.01659000 | 1.85523000 | 3.80974000  | H  | -0.39277400 | 5.60665300  | 3.84187400  |
| C  | -3.93813600 | 0.92575300 | 2.11343200  | H  | 1.25066100  | 3.66829100  | -4.82934900 |
| N  | -4.99299800 | 0.78226000 | 2.93968500  | H  | 1.85580200  | 4.78212800  | -3.57700700 |
| C  | -2.10820600 | 5.77169400 | -3.08068000 | H  | 8.20167700  | 1.00086500  | 0.00783500  |
| C  | -2.34335500 | 4.98933700 | -1.83352700 | H  | -3.65000100 | 4.78693100  | 3.37393700  |
| N  | -3.37289800 | 5.26534800 | -0.94416500 | H  | -4.14073300 | 4.17632400  | 4.96068600  |
| C  | -1.67043200 | 3.93213200 | -1.27912900 | H  | 0.88932300  | 5.88632200  | 5.03596700  |
| C  | -3.29455600 | 4.39904700 | 0.09067500  | H  | -0.12555000 | 4.43201200  | 5.14257900  |
| N  | -2.26574700 | 3.58177600 | -0.07989600 | H  | 4.81417300  | 6.88743300  | -2.54368400 |
| C  | 1.93403100  | 3.76620300 | -3.98327700 | H  | 2.96622200  | 3.62894500  | -4.32054800 |
| C  | 1.57540400  | 2.76162300 | -2.88553100 | H  | -1.84632400 | 6.81550500  | -2.86614400 |
| O  | 2.48433400  | 2.54871700 | -1.99026200 | H  | 2.29675100  | 4.39250300  | 3.90005400  |
| O  | 0.44032800  | 2.25361600 | -2.89320800 | C  | 5.50483100  | -5.66223000 | 4.07360700  |
| Zn | 2.16205800  | 2.68913000 | 0.01841500  | C  | 5.43836500  | -4.56557500 | 3.00302000  |

|   |             |             |             |   |             |             |             |
|---|-------------|-------------|-------------|---|-------------|-------------|-------------|
| C | 6.27807900  | -3.31721700 | 3.34240900  | O | -1.85037500 | -2.25101000 | 1.49098800  |
| C | 6.32217300  | -2.34993300 | 2.15275000  | H | -2.98283100 | -5.24987600 | 6.74788300  |
| C | 5.78099500  | -2.59519200 | 4.60423000  | H | -2.81381300 | -3.64211700 | 7.43308300  |
| C | 6.47211200  | -1.57022800 | -3.88017200 | H | -2.51364800 | -1.67564100 | 5.97753700  |
| C | 5.96194500  | -2.34743700 | -2.66758700 | H | -3.18907500 | -5.54780200 | 4.25386300  |
| S | 7.27605100  | -3.28717800 | -1.77593000 | H | -1.87395200 | -0.79567000 | 3.75400700  |
| C | 0.39764900  | -5.63084100 | -2.41429000 | H | -2.55625200 | -4.66642700 | 2.02092700  |
| C | 1.49453800  | -4.71156700 | -2.95432100 | H | -1.65696700 | -1.29019200 | 1.48704300  |
| O | 2.45206600  | -4.34702000 | -2.26140300 | H | -5.21303800 | -3.12826900 | 6.83677100  |
| C | 0.24575000  | -5.47126200 | -0.89173800 | H | -5.38274700 | -4.74541500 | 6.13897000  |
| C | -0.79629200 | -6.41888500 | -0.32088200 | H | -5.09519800 | -4.55901900 | 7.87926200  |
| O | -2.00609100 | -6.18026700 | -0.33253200 | N | -0.45572500 | -0.36307500 | -1.95300900 |
| N | -0.31935300 | -7.58112900 | 0.19932500  | C | 0.18416100  | -1.56431100 | -1.98327700 |
| N | 1.37825200  | -4.35568100 | -4.25807300 | O | -0.38804700 | -2.62644600 | -2.30093200 |
| C | 2.25645900  | -3.35403000 | -4.85183700 | N | 1.50669300  | -1.57690100 | -1.60511300 |
| H | 5.78945600  | -4.97412100 | 2.04624500  | C | 2.00431500  | -0.71154300 | -0.53988800 |
| H | 4.39198400  | -4.26436800 | 2.84335200  | C | 1.07006100  | -0.65950100 | 0.69842700  |
| H | 7.30789200  | -3.65708600 | 3.53191000  | C | 0.13851400  | 0.53891900  | 0.68944700  |
| H | 6.69654500  | -2.84363500 | 1.24884200  | O | -0.96651600 | 0.45971300  | 1.33037600  |
| H | 6.98090600  | -1.49760800 | 2.36926100  | H | 2.18135600  | 0.29242700  | -0.93009800 |
| H | 5.32177600  | -1.95433500 | 1.92890700  | H | 2.97873000  | -1.11280700 | -0.24799000 |
| H | 6.39320600  | -1.70973000 | 4.81799500  | H | -1.43692000 | -0.39104100 | -2.20356400 |
| H | 4.74164800  | -2.26160500 | 4.47909600  | H | 1.89109700  | -2.52013400 | -1.62788600 |
| H | 5.81908400  | -3.23702900 | 5.48988900  | O | 0.44017300  | 1.64230300  | 0.13919200  |
| H | 5.06867800  | -5.33726700 | 5.02429700  | H | 0.43118500  | -1.54760600 | 0.68884800  |
| H | 5.56497400  | -1.66382500 | -1.90948300 | C | 1.83644700  | -0.68081900 | 2.04083400  |
| H | 5.14811000  | -3.03153800 | -2.92560100 | H | 2.46571300  | 0.20343500  | 2.16246800  |
| H | 7.60143300  | -4.12018200 | -2.78784000 | H | 1.13722400  | -0.72026800 | 2.88163400  |
| H | 7.27459200  | -0.87919500 | -3.60192600 | H | 2.47003700  | -1.57307400 | 2.08487400  |
| H | -0.08816200 | -4.45230900 | -0.68422600 | H | 0.02596800  | 0.52006000  | -2.14947900 |
| H | 1.22121600  | -5.61874400 | -0.41769100 | C | -1.73820000 | -2.43613500 | -5.23469700 |
| H | 0.66650900  | -7.78617800 | 0.25255900  | C | -3.09504900 | -2.32801500 | -4.55443400 |
| H | -0.97732800 | -8.25426900 | 0.56776600  | O | -4.13912400 | -2.35175000 | -5.20278100 |
| H | -0.55805500 | -5.41251000 | -2.90163200 | N | -3.03974400 | -2.15077700 | -3.20037500 |
| H | 3.29734100  | -3.67967100 | -4.77640700 | C | -4.23047200 | -2.26405200 | -2.36844500 |
| H | 2.15728400  | -2.38513800 | -4.34959000 | C | -4.52765200 | -0.92040700 | -1.67586600 |
| H | 0.48952200  | -4.52216200 | -4.70875000 | O | -3.76517900 | -0.49996200 | -0.78714700 |
| H | 0.66632800  | -6.66629400 | -2.66673300 | C | -4.01650900 | -3.34780000 | -1.29241400 |
| H | 1.99693300  | -3.24462800 | -5.90699900 | O | -3.71498100 | -4.56235700 | -1.94029900 |
| H | 6.86803700  | -2.24521600 | -4.64705600 | N | -5.63424100 | -0.21501200 | -2.01725500 |
| H | 5.65550500  | -0.99337900 | -4.33296300 | C | -6.62782000 | -0.47601600 | -3.09228400 |
| H | 6.54241200  | -5.96131600 | 4.26677400  | C | -6.13655800 | 0.00794800  | -4.46265200 |
| H | 4.95842700  | -6.55671300 | 3.75371800  | C | -7.85144100 | 0.30198700  | -2.57242400 |
| C | -4.84236500 | -4.15879500 | 6.89062700  | C | -7.23403200 | 1.55098100  | -1.92149300 |
| C | -3.32332100 | -4.21143100 | 6.64490700  | C | -5.94020400 | 1.02224700  | -1.27903600 |
| C | -2.91076100 | -3.67662700 | 5.28829400  | H | -5.10260100 | 1.72554100  | -1.34060200 |
| C | -2.53735100 | -2.33932400 | 5.11475800  | H | -6.07715800 | 0.78261300  | -0.21663800 |
| C | -2.91074600 | -4.50066600 | 4.15125200  | H | -7.00378400 | 2.30194200  | -2.68483000 |
| C | -2.17980300 | -1.83372300 | 3.86228600  | H | -7.89608100 | 2.02136500  | -1.18804300 |
| C | -2.55913900 | -4.01900500 | 2.89361500  | H | -8.56036900 | 0.53728500  | -3.37130100 |
| C | -2.19017800 | -2.67565700 | 2.74259800  | H | -8.37883600 | -0.29446700 | -1.81809700 |

H -6.84131200 -1.54652900 -3.14128100  
H -5.86094300 1.06896500 -4.43430900  
H -5.28347800 -0.58226700 -4.80134200  
H -6.93619400 -0.11546300 -5.20302900  
H -5.04366000 -2.56806100 -3.02868300  
H -3.11590000 -5.07913900 -1.36551200

H -4.94144300 -3.42359500 -0.69211000  
H -3.21575800 -3.02317000 -0.61656400  
H -2.14885600 -2.39745500 -2.75874400  
H -1.56449700 -1.52715000 -5.82226700  
H -0.91844700 -2.56817300 -4.52821700  
H -1.77820500 -3.27030300 -5.94301600

**SkDHPase.HYD-ES-II**

C -2.73099200 -0.10103300 -4.80017600  
C -3.72409400 -0.13985100 -5.90461100  
N -4.04598700 0.93726400 -6.71780600  
C -4.47850000 -1.17270900 -6.38041800  
C -4.95718300 0.52625300 -7.63580400  
N -5.23258500 -0.75561900 -7.46062600  
C -9.56332300 -3.95540400 -4.12769400  
C -9.07161400 -3.30567200 -5.38367300  
N -9.82246500 -2.36665200 -6.07811000  
C -7.91776900 -3.42985500 -6.11699000  
C -9.12698900 -1.96522600 -7.16770700  
N -7.96480800 -2.59481100 -7.22142700  
C -6.95819100 2.60919700 -10.69330100  
N -7.30193100 1.57106000 -9.74360400  
C -7.29667200 0.25253100 -10.14850700  
O -6.82306800 0.07371900 -11.32408400  
O -7.70936600 -0.62514800 -9.34060800  
C -5.99742500 1.45357600 -14.50229100  
C -6.33124500 0.05871000 -14.95272600  
N -6.33516700 -1.08529600 -14.14327300  
C -6.67944700 -0.30906900 -16.22643000  
C -6.67083500 -2.09741200 -14.93267400  
N -6.88433800 -1.67364500 -16.19680600  
C -0.67058900 -2.26303000 -10.70606800  
C -1.87249600 -1.88466700 -11.50231400  
N -1.87665300 -1.50840900 -12.83953700  
C -3.18774200 -1.87865300 -11.13976200  
C -3.16335200 -1.30933900 -13.22578600  
N -3.98427400 -1.53530300 -12.21275100  
C -2.92952200 -4.25382000 -7.22607700  
C -4.13096500 -4.04826600 -8.15198400  
O -5.21970500 -3.64379500 -7.59782300  
O -3.96290600 -4.21821300 -9.37839600  
Zn -6.39652400 -2.14947100 -8.48693200  
Zn -6.05566000 -1.56529500 -12.00652300  
H -1.72482600 0.15222500 -5.15810000  
H -2.99718300 0.62767100 -4.02384600  
H -4.52757000 -2.19488500 -6.04556600  
H -3.66995400 1.87235700 -6.64281000  
H -5.40561000 1.17022200 -8.37950000  
H -8.75847200 -4.53730300 -3.67143200  
H -10.39698700 -4.63915100 -4.32844200

H -7.04946100 -4.04606900 -5.94065100  
H -10.74870300 -2.05142600 -5.82513700  
H -9.45967100 -1.22536900 -7.87881300  
H -6.64158900 1.76138800 -13.67287100  
H -6.80154300 0.27359900 -17.12649400  
H -7.19517000 -2.25270500 -16.96405300  
H -6.73933900 -3.13169100 -14.63411700  
H -1.00107000 -2.68839500 -9.75564100  
H -0.06752500 -3.02471200 -11.21519100  
H -3.60705000 -2.16833500 -10.19481100  
H -1.06420200 -1.40597600 -13.43216200  
H -3.45632300 -1.01905900 -14.22325500  
H -5.95934200 2.43043200 -11.09569000  
H -2.19995500 -4.92457500 -7.68548600  
H -2.44858200 -3.28203300 -7.05617300  
H -9.89528100 -3.21274600 -3.39226900  
H -4.96085400 1.52837900 -14.15091100  
H -6.12794300 2.15465600 -15.33088200  
H -6.96091300 3.57469300 -10.17759400  
H -7.65921800 2.66414400 -11.53654300  
H -2.67545800 -1.08364300 -4.32507000  
H -3.23747100 -4.64643100 -6.25226900  
H -0.01617200 -1.40774700 -10.49386600  
H -7.92471300 1.79030200 -8.97856000  
C -15.72461000 -5.23247600 -8.59993100  
C -14.28162800 -5.20647700 -8.07993500  
C -13.26141500 -4.66223000 -9.10123300  
C -11.98337100 -4.18772100 -8.39835000  
C -12.93261400 -5.69074200 -10.19673100  
C -8.21561700 -7.89748400 -4.42193200  
C -8.72403500 -7.37559500 -5.76272000  
S -10.56179500 -7.56901300 -5.89686200  
C -9.94099500 -9.39236900 -11.07404800  
C -9.07328600 -9.15093200 -9.84084500  
O -9.24580800 -8.15044700 -9.12736600  
C -9.70946800 -8.28304000 -12.12280200  
C -10.69342000 -8.29606400 -13.28550800  
O -10.33616500 -8.42688900 -14.45869500  
N -12.00558100 -8.15067600 -12.96200300  
N -8.12458700 -10.07215500 -9.57983500  
C -7.14862200 -9.92147100 -8.50393000  
H -14.24900600 -4.57871500 -7.17874900

|   |              |              |              |   |             |              |              |
|---|--------------|--------------|--------------|---|-------------|--------------|--------------|
| H | -13.97483000 | -6.21168900  | -7.75747800  | N | -6.85954900 | -5.07648000  | -11.80439100 |
| H | -13.71722500 | -3.78837600  | -9.59141300  | C | -7.13032000 | -6.11050400  | -10.88146000 |
| H | -12.21380400 | -3.39962400  | -7.67089500  | O | -6.61507300 | -7.21943500  | -10.90951100 |
| H | -11.25985600 | -3.77722500  | -9.11297700  | N | -8.08059300 | -5.63994800  | -10.03060100 |
| H | -11.49860400 | -5.00770800  | -7.85289100  | C | -8.58913800 | -4.34946300  | -10.46357700 |
| H | -12.30205700 | -5.24936800  | -10.97904100 | C | -7.66176400 | -4.01419500  | -11.61757900 |
| H | -12.39297000 | -6.54706000  | -9.76703900  | O | -7.72894400 | -3.01942600  | -12.36629500 |
| H | -13.84228300 | -6.06618000  | -10.68014900 | H | -8.54096300 | -3.57799300  | -9.69351200  |
| H | -15.83184800 | -5.86823400  | -9.48675300  | H | -9.61559600 | -4.41127100  | -10.84809200 |
| H | -8.47177300  | -6.31925900  | -5.89134100  | H | -6.21331200 | -5.15267900  | -12.60757300 |
| H | -8.28333100  | -7.92474200  | -6.59602000  | H | -8.60123900 | -6.32110900  | -9.47896000  |
| H | -10.58331500 | -7.73813900  | -7.23596900  | O | -5.98187900 | -2.64987800  | -10.32455700 |
| H | -8.68597200  | -7.37583200  | -3.58021200  | H | -5.27776800 | -3.33287400  | -10.20930200 |
| H | -8.70858300  | -8.37017700  | -12.55019000 | C | -4.79935200 | -9.57942100  | -11.88501100 |
| H | -9.78365400  | -7.30826400  | -11.62724300 | C | -4.65778900 | -9.05013300  | -13.29664900 |
| H | -12.29607900 | -7.85487800  | -12.04082000 | O | -4.03366100 | -9.63396500  | -14.17748500 |
| H | -12.66777300 | -8.04300200  | -13.71887100 | N | -5.28235200 | -7.84746700  | -13.48157500 |
| H | -9.75235900  | -10.37513400 | -11.52042800 | C | -5.53302400 | -7.31959800  | -14.80804300 |
| H | -7.63216100  | -9.99817400  | -7.52504300  | C | -4.93237000 | -5.91239500  | -14.89648600 |
| H | -6.65317200  | -8.95080400  | -8.59041700  | O | -5.44789000 | -4.98055400  | -14.23445200 |
| H | -8.02946000  | -10.85639200 | -10.20863400 | C | -7.04228600 | -7.27516900  | -15.12346000 |
| H | -10.98174300 | -9.38753200  | -10.73145500 | O | -7.55972200 | -8.56603000  | -14.90094300 |
| H | -6.40629900  | -10.71609900 | -8.59595400  | N | -3.86524800 | -5.67330900  | -15.67760700 |
| H | -8.42397100  | -8.96591300  | -4.30780700  | C | -3.03572600 | -6.64195900  | -16.44698200 |
| H | -7.13210000  | -7.74608800  | -4.34494300  | C | -2.03261400 | -7.37469300  | -15.54554100 |
| H | -16.06083900 | -4.22485900  | -8.87261600  | C | -2.37116700 | -5.71722400  | -17.48356000 |
| H | -16.41173300 | -5.61786800  | -7.83863900  | C | -2.11166300 | -4.41912900  | -16.70054800 |
| C | -12.65108400 | -2.36154900  | -18.57849600 | C | -3.33369300 | -4.29896000  | -15.77414700 |
| C | -13.44761900 | -2.81482800  | -17.34402200 | H | -3.09410900 | -3.91453000  | -14.77811100 |
| C | -12.51245200 | -3.35631800  | -16.29005700 | H | -4.10985400 | -3.64689700  | -16.19251200 |
| C | -11.83662800 | -2.48673300  | -15.42626100 | H | -1.19214700 | -4.50856900  | -16.11237300 |
| C | -12.18956300 | -4.71864300  | -16.23876300 | H | -2.00168900 | -3.54635000  | -17.35090000 |
| C | -10.84751800 | -2.95044700  | -14.56229300 | H | -1.46175900 | -6.15682400  | -17.90212300 |
| C | -11.20128900 | -5.20432900  | -15.38511100 | H | -3.06498700 | -5.52757200  | -18.31137800 |
| C | -10.51776400 | -4.30955400  | -14.55920100 | H | -3.68620000 | -7.37022800  | -16.93754400 |
| O | -9.51644800  | -4.79630200  | -13.75427500 | H | -1.42082200 | -6.66793700  | -14.97391700 |
| H | -14.17593600 | -3.58074200  | -17.63725000 | H | -2.54389800 | -8.05028800  | -14.85634400 |
| H | -14.02227900 | -1.96794900  | -16.94776800 | H | -1.36307600 | -7.98322000  | -16.16439200 |
| H | -12.07675900 | -1.42538000  | -15.43884300 | H | -5.05257500 | -8.01458100  | -15.49679400 |
| H | -12.70359900 | -5.41235900  | -16.90112700 | H | -8.53953300 | -8.51518400  | -14.87805300 |
| H | -10.32689700 | -2.26594200  | -13.89541500 | H | -7.16524100 | -6.95244600  | -16.17310800 |
| H | -10.93360800 | -6.25662900  | -15.36948900 | H | -7.53314000 | -6.51862700  | -14.49566300 |
| H | -8.98231500  | -4.03695500  | -13.45564200 | H | -5.85635700 | -7.52671400  | -12.70536700 |
| H | -11.93497700 | -1.57572200  | -18.31209000 | H | -4.54697200 | -8.81487700  | -11.14535500 |
| H | -12.08527400 | -3.19774800  | -19.00443700 | H | -5.83831400 | -9.87370100  | -11.70100500 |
| H | -13.31206500 | -1.96637600  | -19.35915400 | H | -4.14951000 | -10.44825400 | -11.76571000 |

#### **SkDHPase.HYD-TS1-II**

|   |             |             |             |   |             |             |             |
|---|-------------|-------------|-------------|---|-------------|-------------|-------------|
| C | -2.73099200 | -0.10103200 | -4.80017500 | C | -4.49522400 | -1.13795800 | -6.38964400 |
| C | -3.59536300 | -0.18451200 | -6.00902500 | C | -4.48062800 | 0.31900100  | -7.99128200 |
| N | -3.60243700 | 0.73976000  | -7.04569500 | N | -5.03431300 | -0.82302300 | -7.62296700 |

|    |              |             |              |   |              |              |              |
|----|--------------|-------------|--------------|---|--------------|--------------|--------------|
| C  | -9.56332400  | -3.95540600 | -4.12769400  | H | -9.87548300  | -3.24668600  | -3.35118700  |
| C  | -9.04475900  | -3.25410800 | -5.34024400  | H | -4.94297000  | 1.50439500   | -14.20280900 |
| N  | -9.75256600  | -2.24858600 | -5.98408700  | H | -6.15188200  | 2.17125300   | -15.31254700 |
| C  | -7.89648600  | -3.39242800 | -6.07691800  | H | -7.10673600  | 3.57786000   | -10.20710400 |
| C  | -9.03949500  | -1.82500000 | -7.05302400  | H | -7.55542800  | 2.59015500   | -11.61477200 |
| N  | -7.90607400  | -2.50254300 | -7.13711400  | H | -2.92469300  | -0.96180700  | -4.15551100  |
| C  | -6.95819200  | 2.60919200  | -10.69330100 | H | -3.17517300  | -4.61007400  | -6.22106700  |
| N  | -7.32927700  | 1.55958200  | -9.76835100  | H | -0.19363100  | -1.36333200  | -10.29628400 |
| C  | -7.10804000  | 0.24479900  | -10.07370400 | H | -8.02284700  | 1.74173300   | -9.05821000  |
| O  | -6.36106600  | 0.05597700  | -11.10012200 | C | -15.72463400 | -5.23247500  | -8.59994100  |
| O  | -7.59968100  | -0.64219200 | -9.31677800  | C | -14.28160300 | -5.20647800  | -8.07992100  |
| C  | -5.99742600  | 1.45356800  | -14.50229100 | C | -13.30999700 | -4.39507500  | -8.95956300  |
| C  | -6.38664700  | 0.07603200  | -14.95156100 | C | -12.00290500 | -4.11253200  | -8.20732300  |
| N  | -6.37501100  | -1.06248300 | -14.14095400 | C | -13.02649400 | -5.09050400  | -10.30010800 |
| C  | -6.80643400  | -0.28433700 | -16.20560200 | C | -8.21562000  | -7.89747100  | -4.42193300  |
| C  | -6.77238500  | -2.07109900 | -14.90820700 | C | -8.68667800  | -7.39053200  | -5.78261500  |
| N  | -7.03972400  | -1.64372900 | -16.15973300 | S | -10.51068800 | -7.63790600  | -5.99117000  |
| C  | -0.67059200  | -2.26302900 | -10.70606900 | C | -9.43289500  | -9.12096100  | -11.43967600 |
| C  | -1.88722800  | -1.94308700 | -11.50309200 | C | -8.87632200  | -9.04645300  | -10.01944900 |
| N  | -1.91619500  | -1.21445500 | -12.68499300 | O | -9.20534300  | -8.16242000  | -9.21296900  |
| C  | -3.19163100  | -2.25946600 | -11.25563700 | C | -10.74696200 | -8.35948800  | -11.58696900 |
| C  | -3.20574000  | -1.11702900 | -13.09580900 | C | -11.01484600 | -7.86120900  | -13.00400400 |
| N  | -4.00441300  | -1.74029300 | -12.24362700 | O | -10.22059800 | -7.98503500  | -13.93623400 |
| C  | -2.92951200  | -4.25382200 | -7.22607000  | N | -12.22160400 | -7.25841400  | -13.17619100 |
| C  | -4.18485200  | -4.11933700 | -8.08609800  | N | -7.97254200  | -9.99854600  | -9.70405100  |
| O  | -5.23077600  | -3.64642600 | -7.51441500  | C | -7.14861700  | -9.92148000  | -8.50393500  |
| O  | -4.10352100  | -4.41164000 | -9.30280600  | H | -14.28219900 | -4.77640400  | -7.06889900  |
| Zn | -6.38058800  | -2.16941800 | -8.47043700  | H | -13.90035700 | -6.23193300  | -7.97073300  |
| Zn | -6.03757800  | -1.60851600 | -12.04761700 | H | -13.78756000 | -3.42759400  | -9.17964300  |
| H  | -1.66373200  | -0.10981500 | -5.05512000  | H | -12.19955800 | -3.54623700  | -7.28845500  |
| H  | -2.92300900  | 0.80494100  | -4.21157200  | H | -11.30544300 | -3.52734400  | -8.81978400  |
| H  | -4.76439200  | -2.05381500 | -5.89114600  | H | -11.50158500 | -5.04308500  | -7.91198000  |
| H  | -3.04971700  | 1.58460800  | -7.09254900  | H | -12.36300700 | -4.48822300  | -10.93257900 |
| H  | -4.68128400  | 0.85141500  | -8.90847900  | H | -12.53942700 | -6.05981600  | -10.12503300 |
| H  | -8.78115700  | -4.58971600 | -3.70308500  | H | -13.94874100 | -5.26772500  | -10.86590900 |
| H  | -10.41796700 | -4.59935100 | -4.36885300  | H | -15.80196500 | -5.71146400  | -9.58267500  |
| H  | -7.05907400  | -4.05754300 | -5.93337400  | H | -8.46023500  | -6.32704300  | -5.90256500  |
| H  | -10.66524300 | -1.90737400 | -5.71566100  | H | -8.19542000  | -7.92497200  | -6.59719600  |
| H  | -9.34269300  | -1.04526200 | -7.73369700  | H | -10.46720000 | -7.85963100  | -7.32226700  |
| H  | -6.58956400  | 1.77000600  | -13.63795200 | H | -8.73586100  | -7.39127700  | -3.60024000  |
| H  | -6.95951000  | 0.29813700  | -17.10100000 | H | -10.72257900 | -7.49017100  | -10.91843700 |
| H  | -7.40496100  | -2.21850700 | -16.90626700 | H | -11.59786900 | -8.96792500  | -11.25576100 |
| H  | -6.85651600  | -3.10288600 | -14.60321200 | H | -12.79738100 | -7.01463500  | -12.38274600 |
| H  | -0.95602500  | -2.90692900 | -9.87082000  | H | -12.37222100 | -6.74351600  | -14.03482000 |
| H  | 0.08503900   | -2.79793800 | -11.29484700 | H | -8.67806500  | -8.68484200  | -12.10515100 |
| H  | -3.56873900  | -2.86905900 | -10.45027100 | H | -7.76861400  | -10.01106600 | -7.60734500  |
| H  | -1.11680300  | -0.82926900 | -13.16923000 | H | -6.60520900  | -8.97156200  | -8.47174600  |
| H  | -3.51694800  | -0.60645200 | -13.99437000 | H | -7.68570200  | -10.63396500 | -10.43540100 |
| H  | -5.90631100  | 2.51384000  | -10.97012000 | H | -9.54529700  | -10.16613200 | -11.74999000 |
| H  | -2.20812600  | -4.92644900 | -7.69489200  | H | -6.43403500  | -10.74660900 | -8.51914000  |
| H  | -2.47331900  | -3.26148700 | -7.11898400  | H | -8.39648000  | -8.97160100  | -4.31612900  |



|   |              |             |              |   |             |              |              |
|---|--------------|-------------|--------------|---|-------------|--------------|--------------|
| H | -7.14091900  | -7.71399200 | -4.30132200  | H | -5.42505200 | -3.61201600  | -10.10054800 |
| H | -16.12726400 | -4.21643900 | -8.69357900  | C | -4.81184500 | -9.56723600  | -11.86295200 |
| H | -16.37810400 | -5.78631500 | -7.91699200  | C | -4.65051300 | -8.99879800  | -13.25844700 |
| C | -12.65108500 | -2.36154900 | -18.57849700 | O | -4.03365800 | -9.58158200  | -14.14638100 |
| C | -13.33857500 | -2.76522000 | -17.26452400 | N | -5.25956400 | -7.78808100  | -13.42350100 |
| C | -12.31976000 | -3.23282200 | -16.25305500 | C | -5.52558000 | -7.24835200  | -14.74277500 |
| C | -11.71573800 | -2.33443200 | -15.36738000 | C | -4.91383200 | -5.84513100  | -14.83412600 |
| C | -11.85937200 | -4.55785300 | -16.25965700 | O | -5.41868000 | -4.90571400  | -14.17640400 |
| C | -10.67304200 | -2.72879100 | -14.52852000 | C | -7.04208600 | -7.18642500  | -15.01961000 |
| C | -10.81819900 | -4.97300700 | -15.43382400 | O | -7.57377500 | -8.47729900  | -14.82445200 |
| C | -10.21377600 | -4.04982600 | -14.57061500 | N | -3.84252500 | -5.61822600  | -15.61525000 |
| O | -9.18111500  | -4.48765300 | -13.79567200 | C | -3.03848800 | -6.59222600  | -16.40376100 |
| H | -14.06889600 | -3.55950200 | -17.46439600 | C | -2.04509800 | -7.36252300  | -15.52347900 |
| H | -13.90292600 | -1.91179900 | -16.86829000 | C | -2.36054000 | -5.66641500  | -17.43134800 |
| H | -12.05837600 | -1.30190300 | -15.33746700 | C | -2.07486900 | -4.38320000  | -16.63322400 |
| H | -12.31122200 | -5.27432400 | -16.94348800 | C | -3.29507700 | -4.25009400  | -15.70713900 |
| H | -10.21453000 | -2.01919300 | -13.84297500 | H | -3.05189200 | -3.87158700  | -14.70970700 |
| H | -10.45796000 | -5.99749700 | -15.44160900 | H | -4.06280500 | -3.58695700  | -16.12409300 |
| H | -8.75949800  | -3.73189400 | -13.33241200 | H | -1.15824900 | -4.49815500  | -16.04483100 |
| H | -11.93790800 | -1.54635600 | -18.40996800 | H | -1.94631200 | -3.50482500  | -17.27266700 |
| H | -12.09749500 | -3.20581000 | -19.00462000 | H | -1.46087700 | -6.11750200  | -17.85887500 |
| H | -13.38052000 | -2.02440000 | -19.32451700 | H | -3.05361100 | -5.45329100  | -18.25421100 |
| N | -6.83850000  | -4.96746400 | -11.72845600 | H | -3.70790500 | -7.29834700  | -16.90150800 |
| C | -7.16334400  | -6.02998100 | -10.88718100 | H | -1.40999200 | -6.67825200  | -14.94961200 |
| O | -6.74553100  | -7.17828000 | -11.00393800 | H | -2.56477000 | -8.03600700  | -14.83879700 |
| N | -8.04207000  | -5.55786300 | -9.95435200  | H | -1.39690600 | -7.97748800  | -16.15873300 |
| C | -8.50828900  | -4.22876500 | -10.31918900 | H | -5.06595800 | -7.94111500  | -15.44813000 |
| C | -7.47876200  | -3.81124700 | -11.36782300 | H | -8.51058700 | -8.38237300  | -14.56809400 |
| O | -7.65154600  | -2.84949600 | -12.20106000 | H | -7.18894100 | -6.83374400  | -16.05684100 |
| H | -8.55891700  | -3.53714600 | -9.48028700  | H | -7.51077200 | -6.44578900  | -14.36035700 |
| H | -9.48773900  | -4.25925600 | -10.81896800 | H | -5.84497200 | -7.47699500  | -12.64882500 |
| H | -6.23731900  | -5.04317000 | -12.56263400 | H | -3.95587000 | -10.20757400 | -11.63756000 |
| H | -8.60482800  | -6.25178200 | -9.46478500  | H | -4.92344600 | -8.79240600  | -11.10270800 |
| O | -6.11594300  | -2.91894800 | -10.29156100 | H | -5.71354000 | -10.19163900 | -11.84787200 |

### **SkDHPase.HYD-INT1-II**

|   |             |             |              |   |             |             |              |
|---|-------------|-------------|--------------|---|-------------|-------------|--------------|
| C | -2.73099200 | -0.10103300 | -4.80017600  | O | -6.18394700 | 0.04321100  | -11.06150600 |
| C | -3.55496200 | -0.19998600 | -6.03525000  | O | -7.51320600 | -0.68457200 | -9.35802100  |
| N | -3.46160000 | 0.65261000  | -7.12799600  | C | -5.99742500 | 1.45357600  | -14.50229100 |
| C | -4.50459200 | -1.11341800 | -6.39000600  | C | -6.42910300 | 0.11329000  | -15.01118200 |
| C | -4.33281400 | 0.23155600  | -8.07961900  | N | -6.39029000 | -1.04258500 | -14.23558400 |
| N | -4.97649400 | -0.84428100 | -7.66098500  | C | -6.91064900 | -0.21529300 | -16.25092300 |
| C | -9.56332500 | -3.95540700 | -4.12769100  | C | -6.83402000 | -2.03757600 | -14.99803400 |
| C | -9.04396900 | -3.23312000 | -5.32374200  | N | -7.15220800 | -1.57559400 | -16.22280600 |
| N | -9.76824800 | -2.25300600 | -5.98717800  | C | -0.67058900 | -2.26303000 | -10.70606800 |
| C | -7.87411500 | -3.33618300 | -6.02893900  | C | -1.88264900 | -1.94484400 | -11.51551900 |
| C | -9.04453800 | -1.80963400 | -7.03984900  | N | -1.87083400 | -1.33130000 | -12.76099100 |
| N | -7.88774000 | -2.45005100 | -7.09104800  | C | -3.20539300 | -2.16109000 | -11.24745500 |
| C | -6.95819100 | 2.60919700  | -10.69330200 | C | -3.15048100 | -1.20414800 | -13.19038900 |
| N | -7.33261900 | 1.51562400  | -9.82140600  | N | -3.98527000 | -1.69677100 | -12.28833500 |
| C | -7.01472100 | 0.21780100  | -10.09822000 | C | -2.92952000 | -4.25382000 | -7.22607700  |

|    |              |             |              |   |              |              |              |
|----|--------------|-------------|--------------|---|--------------|--------------|--------------|
| C  | -4.18328300  | -4.10266500 | -8.07294100  | N | -7.90558700  | -9.95280100  | -9.75031300  |
| O  | -5.22684200  | -3.63110100 | -7.50201100  | C | -7.14861800  | -9.92147700  | -8.50393300  |
| O  | -4.10411400  | -4.38167400 | -9.29695700  | H | -14.27472300 | -4.72367500  | -7.09277600  |
| Zn | -6.38900300  | -2.15337000 | -8.42893400  | H | -13.91935300 | -6.23159800  | -7.91702300  |
| Zn | -6.01243200  | -1.50504500 | -12.25229200 | H | -13.76213500 | -3.50117600  | -9.27949400  |
| H  | -1.65909800  | -0.20459000 | -5.01058200  | H | -12.17981600 | -3.52295900  | -7.38462000  |
| H  | -2.87486700  | 0.85309100  | -4.27782700  | H | -11.28056000 | -3.61490100  | -8.91176300  |
| H  | -4.85127800  | -1.97238400 | -5.84080800  | H | -11.49972400 | -5.06631700  | -7.91080600  |
| H  | -2.85024300  | 1.45378000  | -7.20581700  | H | -12.35281100 | -4.67594500  | -10.96681000 |
| H  | -4.46200500  | 0.70840200  | -9.03968500  | H | -12.53530000 | -6.19497500  | -10.06956600 |
| H  | -8.77092700  | -4.56984600 | -3.69306900  | H | -13.94226500 | -5.44150000  | -10.85397200 |
| H  | -10.39363100 | -4.62245100 | -4.39005500  | H | -15.80856300 | -5.75712500  | -9.55845600  |
| H  | -7.02494400  | -3.98159000 | -5.86666900  | H | -8.41420300  | -6.32385300  | -5.90625800  |
| H  | -10.70215200 | -1.94898700 | -5.74807300  | H | -8.19133700  | -7.92860600  | -6.59824900  |
| H  | -9.36279800  | -1.05057800 | -7.73698000  | H | -10.45253000 | -7.82722000  | -7.32677500  |
| H  | -6.54870000  | 1.72775100  | -13.59733000 | H | -8.72533400  | -7.37721300  | -3.60232200  |
| H  | -7.10026400  | 0.38569100  | -17.12670400 | H | -9.92033800  | -7.01502500  | -11.61809500 |
| H  | -7.57248200  | -2.12718800 | -16.95830400 | H | -11.21468000 | -8.01070500  | -10.96927800 |
| H  | -6.91455300  | -3.07373500 | -14.70027500 | H | -12.89781100 | -7.54166100  | -12.39589200 |
| H  | -0.97309000  | -2.82427300 | -9.81877900  | H | -12.76547100 | -7.68825600  | -14.11953700 |
| H  | 0.04466200   | -2.88205200 | -11.26118700 | H | -8.59638000  | -9.03958500  | -12.18927000 |
| H  | -3.62322800  | -2.67730100 | -10.39962600 | H | -7.82454100  | -10.02377900 | -7.65087800  |
| H  | -1.04950600  | -1.04403700 | -13.27568900 | H | -6.58957200  | -8.98386300  | -8.40555000  |
| H  | -3.42993400  | -0.76838500 | -14.13780200 | H | -7.51418300  | -10.47648000 | -10.52100900 |
| H  | -5.90907400  | 2.51401900  | -10.97835500 | H | -9.89100500  | -10.08401200 | -11.60165500 |
| H  | -2.21173300  | -4.91982700 | -7.70897000  | H | -6.44982000  | -10.76041400 | -8.50035600  |
| H  | -2.47216300  | -3.26386500 | -7.10319000  | H | -8.42451500  | -8.96640400  | -4.31529700  |
| H  | -9.91112800  | -3.26235600 | -3.35213400  | H | -7.13677600  | -7.74197800  | -4.29775200  |
| H  | -4.93061300  | 1.46643100  | -14.24586900 | H | -16.10888800 | -4.21523300  | -8.74425700  |
| H  | -6.16970900  | 2.22369200  | -15.25918400 | H | -16.38901400 | -5.74069800  | -7.89231600  |
| H  | -7.09440200  | 3.55331300  | -10.15824600 | C | -12.65108400 | -2.36154900  | -18.57849600 |
| H  | -7.56186100  | 2.64374400  | -11.61067600 | C | -13.13235100 | -2.40885100  | -17.11766500 |
| H  | -3.01231200  | -0.90115500 | -4.11125000  | C | -12.07129700 | -2.90114100  | -16.15518100 |
| H  | -3.17268600  | -4.62565900 | -6.22635200  | C | -11.35956200 | -2.02149500  | -15.33270300 |
| H  | -0.14242100  | -1.35911500 | -10.37681200 | C | -11.74685800 | -4.26533700  | -16.07713500 |
| H  | -8.05134400  | 1.65693800  | -9.12715300  | C | -10.36015700 | -2.47258200  | -14.46554400 |
| C  | -15.72461300 | -5.23247400 | -8.59993300  | C | -10.75395600 | -4.73663500  | -15.22441000 |
| C  | -14.28162700 | -5.20647900 | -8.07993100  | C | -10.05039100 | -3.83754600  | -14.40906700 |
| C  | -13.29693900 | -4.46035400 | -9.00300900  | O | -9.08659600  | -4.34846200  | -13.59296900 |
| C  | -11.98771600 | -4.14953300 | -8.26520100  | H | -14.01606100 | -3.05811200  | -17.05683000 |
| C  | -13.01900900 | -5.23598400 | -10.29984100 | H | -13.46603400 | -1.40850400  | -16.81450400 |
| C  | -8.21561900  | -7.89747300 | -4.42193400  | H | -11.59349900 | -0.95871600  | -15.35987800 |
| C  | -8.66953500  | -7.38084100 | -5.78488200  | H | -12.28544000 | -4.97621600  | -16.70148300 |
| S  | -10.49837800 | -7.58069200 | -6.00001000  | H | -9.83340800  | -1.77342500  | -13.81992200 |
| C  | -9.41487400  | -9.10360200 | -11.46500800 | H | -10.51245300 | -5.79447400  | -15.17045700 |
| C  | -8.84955800  | -9.02823700 | -10.04515500 | H | -8.58490200  | -3.63986900  | -13.11618700 |
| O  | -9.25262700  | -8.21130900 | -9.20470100  | H | -11.79486100 | -1.68529900  | -18.68703600 |
| C  | -10.42377800 | -7.98287900 | -11.72419800 | H | -12.33636600 | -3.35327000  | -18.92273900 |
| C  | -11.01002700 | -8.00840600 | -13.12743400 | H | -13.44722200 | -2.01017700  | -19.24485400 |
| O  | -10.33625600 | -8.18628600 | -14.14460400 | N | -6.63796300  | -4.95770000  | -11.59237600 |
| N  | -12.34879600 | -7.79293600 | -13.20424500 | C | -7.18917900  | -6.03274000  | -10.94705300 |

|   |             |             |              |   |             |              |              |
|---|-------------|-------------|--------------|---|-------------|--------------|--------------|
| O | -6.95616800 | -7.22288700 | -11.18209500 | C | -2.04510100 | -7.36252100  | -15.52347900 |
| N | -8.04817200 | -5.56025400 | -9.98346100  | C | -2.41084000 | -5.75120600  | -17.49462500 |
| C | -8.38355000 | -4.17051500 | -10.26354800 | C | -2.14505000 | -4.43422700  | -16.74636200 |
| C | -7.16484600 | -3.70608100 | -11.10728100 | C | -3.35787500 | -4.29475300  | -15.81067300 |
| O | -7.42755900 | -2.79854200 | -12.06950300 | H | -3.10748000 | -3.88281100  | -14.82773000 |
| H | -8.50515400 | -3.57417500 | -9.35958800  | H | -4.13993300 | -3.65397500  | -16.23647100 |
| H | -9.28891300 | -4.07899300 | -10.87710000 | H | -1.21923900 | -4.50860800  | -16.16589800 |
| H | -6.17666600 | -5.02659900 | -12.50409700 | H | -2.04290300 | -3.57672600  | -17.41832700 |
| H | -8.69440800 | -6.23453300 | -9.58024800  | H | -1.50558500 | -6.19900700  | -17.91388300 |
| O | -6.12915200 | -3.11763900 | -10.21843900 | H | -3.11541200 | -5.58236500  | -18.31796900 |
| H | -5.40859000 | -3.80818300 | -9.98539900  | H | -3.71495500 | -7.39322200  | -16.89184500 |
| C | -4.81183800 | -9.56725100 | -11.86294900 | H | -1.42906900 | -6.64245500  | -14.97268200 |
| C | -4.66637000 | -8.99320100 | -13.26148100 | H | -2.54889000 | -8.02600500  | -14.81730800 |
| O | -4.01243700 | -9.56097400 | -14.13448300 | H | -1.38027500 | -7.98115400  | -16.13778700 |
| N | -5.31258800 | -7.80688600 | -13.44361200 | H | -5.11328600 | -7.98214800  | -15.47026500 |
| C | -5.57069100 | -7.28101100 | -14.77140400 | H | -8.56691800 | -8.42241200  | -14.63242000 |
| C | -4.96349000 | -5.87567200 | -14.89242800 | H | -7.23919700 | -6.86226000  | -16.07774400 |
| O | -5.47926700 | -4.91960800 | -14.27297600 | H | -7.54908800 | -6.47866400  | -14.37648100 |
| C | -7.08813100 | -7.21943700 | -15.04246100 | H | -5.93808100 | -7.51370100  | -12.68983100 |
| O | -7.61742800 | -8.51104400 | -14.85034700 | H | -3.82527600 | -9.86894700  | -11.49808800 |
| N | -3.88394600 | -5.66589300 | -15.67368600 | H | -5.27840600 | -8.87587600  | -11.16022100 |
| C | -3.06133800 | -6.65109700 | -16.42706000 | H | -5.41558500 | -10.48055300 | -11.93578600 |

#### SkDHPase.HYD-TS2-II

|   |             |             |              |    |              |             |              |
|---|-------------|-------------|--------------|----|--------------|-------------|--------------|
| C | -2.73099400 | -0.10103300 | -4.80017700  | C  | -3.19846400  | -1.50827300 | -13.24935000 |
| C | -3.56376600 | -0.20852600 | -6.03167900  | N  | -4.01151800  | -1.64273700 | -12.21528400 |
| N | -3.43539900 | 0.60663700  | -7.14962000  | C  | -2.92952100  | -4.25382000 | -7.22607700  |
| C | -4.54987200 | -1.09363800 | -6.36294500  | C  | -4.19821000  | -4.05916700 | -8.02612900  |
| C | -4.31964700 | 0.19300200  | -8.09167800  | O  | -5.23202500  | -3.63244600 | -7.45209100  |
| N | -5.00622700 | -0.84552800 | -7.64491000  | O  | -4.11067100  | -4.26840900 | -9.28993500  |
| C | -9.56332700 | -3.95540900 | -4.12768800  | Zn | -6.45758900  | -2.09055200 | -8.45449900  |
| C | -9.04567300 | -3.21403000 | -5.30840100  | Zn | -6.04436800  | -1.47997700 | -12.13732200 |
| N | -9.76909500 | -2.22269200 | -5.95351500  | H  | -1.66547400  | -0.25656600 | -5.01028800  |
| C | -7.87888200 | -3.31182500 | -6.01762500  | H  | -2.83363400  | 0.87645300  | -4.31284300  |
| C | -9.04865700 | -1.76726400 | -7.00220400  | H  | -4.93746600  | -1.91519500 | -5.78442200  |
| N | -7.89389200 | -2.41162000 | -7.06675700  | H  | -2.79581900  | 1.38332300  | -7.24773100  |
| C | -6.95819000 | 2.60919700  | -10.69330100 | H  | -4.43075800  | 0.64371300  | -9.06699600  |
| N | -7.42405200 | 1.55839700  | -9.81979900  | H  | -8.76800800  | -4.56835900 | -3.69606300  |
| C | -7.08176300 | 0.25754500  | -10.02059400 | H  | -10.38524000 | -4.62764100 | -4.40348500  |
| O | -6.17651600 | 0.04832400  | -10.90763600 | H  | -7.03423900  | -3.96483700 | -5.86457400  |
| O | -7.63134400 | -0.61984400 | -9.28648900  | H  | -10.70155000 | -1.92018100 | -5.70714900  |
| C | -5.99742500 | 1.45357600  | -14.50229200 | H  | -9.36537100  | -0.99825100 | -7.68842900  |
| C | -6.43581900 | 0.09792000  | -14.96136000 | H  | -6.61325000  | 1.81026900  | -13.66999800 |
| N | -6.42125800 | -1.02960600 | -14.14296600 | H  | -7.07984300  | 0.30397200  | -17.09246400 |
| C | -6.90783600 | -0.26836900 | -16.19411400 | H  | -7.59194400  | -2.19533900 | -16.83809700 |
| C | -6.86986300 | -2.04418800 | -14.87627300 | H  | -6.96891400  | -3.06656800 | -14.54242400 |
| N | -7.16740000 | -1.62360900 | -16.12076500 | H  | -0.95543600  | -2.51669800 | -9.68226200  |
| C | -0.67059000 | -2.26303000 | -10.70606800 | H  | -0.12330700  | -3.12023100 | -11.11639500 |
| C | -1.89812200 | -1.96098500 | -11.49760600 | H  | -3.63000900  | -2.11913800 | -10.15635100 |
| N | -1.91269800 | -1.68982700 | -12.85904100 | H  | -1.10546900  | -1.65364300 | -13.46649600 |
| C | -3.21223300 | -1.91663300 | -11.12524800 | H  | -3.49888200  | -1.29279800 | -14.26325700 |

|   |              |              |              |   |              |              |              |
|---|--------------|--------------|--------------|---|--------------|--------------|--------------|
| H | -5.88543300  | 2.50591200   | -10.86481200 | H | -9.90878600  | -9.93304000  | -11.60826800 |
| H | -2.22448200  | -4.90131700  | -7.75080500  | H | -6.46583200  | -10.77354900 | -8.51425400  |
| H | -2.46711700  | -3.27011500  | -7.07657000  | H | -8.45777100  | -8.95878500  | -4.30991300  |
| H | -9.92256800  | -3.27699800  | -3.34432100  | H | -7.13077700  | -7.77701300  | -4.31172700  |
| H | -4.95725900  | 1.44494800   | -14.15458600 | H | -16.13718300 | -4.21813700  | -8.66424400  |
| H | -6.07554900  | 2.17664000   | -15.31889900 | H | -16.37294300 | -5.81260600  | -7.93392000  |
| H | -7.14768500  | 3.57684700   | -10.21977800 | C | -12.65108400 | -2.36154900  | -18.57849600 |
| H | -7.46286600  | 2.60120200   | -11.66891000 | C | -12.98653300 | -2.17727300  | -17.07110900 |
| H | -3.04302900  | -0.86334400  | -4.08219400  | C | -11.94682300 | -2.73112400  | -16.11526000 |
| H | -3.15552200  | -4.66325400  | -6.23800100  | C | -11.27969700 | -1.91060800  | -15.19989400 |
| H | 0.02180300   | -1.41253200  | -10.66730200 | C | -11.62500300 | -4.09932200  | -16.10738300 |
| H | -8.18672300  | 1.73161300   | -9.18229500  | C | -10.32917200 | -2.41945900  | -14.30913000 |
| C | -15.72468000 | -5.23247300  | -8.59994800  | C | -10.67936500 | -4.62687300  | -15.23374700 |
| C | -14.28154600 | -5.20648100  | -8.07991900  | C | -10.02063500 | -3.78569900  | -14.32281600 |
| C | -13.32036000 | -4.36847300  | -8.94757800  | O | -9.10029400  | -4.34832300  | -13.49114300 |
| C | -12.02523800 | -4.05711800  | -8.18525900  | H | -13.95328000 | -2.65337500  | -16.86028200 |
| C | -13.00873800 | -5.05053900  | -10.28874600 | H | -13.13134500 | -1.11323100  | -16.85204100 |
| C | -8.21562200  | -7.89747300  | -4.42193400  | H | -11.50912500 | -0.84691400  | -15.17251400 |
| C | -8.66942400  | -7.36958400  | -5.78070400  | H | -12.12560600 | -4.76855600  | -16.80486900 |
| S | -10.50602100 | -7.51054600  | -5.97260500  | H | -9.83458800  | -1.76400100  | -13.59623000 |
| C | -9.38494100  | -8.98038400  | -11.45118300 | H | -10.44055000 | -5.68675400  | -15.23656300 |
| C | -8.82623900  | -8.96373900  | -10.02667500 | H | -8.58440000  | -3.66415000  | -12.98645200 |
| O | -9.22386900  | -8.17136900  | -9.16005300  | H | -11.68730300 | -2.86299000  | -18.71342300 |
| C | -10.33729000 | -7.80666500  | -11.69172800 | H | -13.40707400 | -2.96224400  | -19.09408500 |
| C | -10.95823600 | -7.79993600  | -13.08006000 | H | -12.59447100 | -1.39852800  | -19.09694000 |
| O | -10.32987700 | -8.05408800  | -14.11020100 | N | -6.54479000  | -4.92259200  | -11.48670300 |
| N | -12.27434500 | -7.46814500  | -13.12860400 | C | -7.05359000  | -6.00528600  | -10.83058800 |
| N | -7.89846000  | -9.91154300  | -9.75529000  | O | -6.79675300  | -7.19373600  | -11.06084600 |
| C | -7.14862000  | -9.92147600  | -8.50393700  | N | -7.91410200  | -5.55379500  | -9.85316600  |
| H | -14.28467300 | -4.79681000  | -7.06038700  | C | -8.30540800  | -4.18287500  | -10.15663600 |
| H | -13.89159600 | -6.23067400  | -7.99247600  | C | -7.10149400  | -3.67130800  | -10.99967000 |
| H | -13.81881300 | -3.41136000  | -9.16701400  | O | -7.43248100  | -2.80778700  | -11.99813700 |
| H | -12.24241400 | -3.48987700  | -7.27085200  | H | -8.46510300  | -3.58353800  | -9.26059400  |
| H | -11.33347300 | -3.46376500  | -8.79639500  | H | -9.21138800  | -4.14022200  | -10.77515100 |
| H | -11.50795800 | -4.97591900  | -7.88144800  | H | -6.07626400  | -4.98488800  | -12.39280400 |
| H | -12.36307400 | -4.42559500  | -10.91687400 | H | -8.56075000  | -6.24537700  | -9.47961300  |
| H | -12.48725300 | -6.00139200  | -10.11307500 | O | -6.10041400  | -3.02796000  | -10.17127400 |
| H | -13.92238900 | -5.25846000  | -10.85811100 | H | -5.14098200  | -3.77569900  | -9.81860500  |
| H | -15.79666700 | -5.68289200  | -9.59652600  | C | -4.81770800  | -9.58761800  | -11.88278000 |
| H | -8.38155600  | -6.32164500  | -5.90838300  | C | -4.67283700  | -8.98939500  | -13.26992800 |
| H | -8.22023100  | -7.93449700  | -6.59871400  | O | -4.05321800  | -9.56037700  | -14.16576400 |
| H | -10.48525600 | -7.74752900  | -7.30147300  | N | -5.28324000  | -7.77956700  | -13.41777600 |
| H | -8.69724600  | -7.35905900  | -3.59702600  | C | -5.56043900  | -7.23475300  | -14.73377400 |
| H | -9.78308800  | -6.86495800  | -11.60148300 | C | -4.92168500  | -5.84541200  | -14.86284300 |
| H | -11.11042400 | -7.79179200  | -10.91832400 | O | -5.38852700  | -4.88013900  | -14.22208800 |
| H | -12.77266600 | -7.14270200  | -12.31354300 | C | -7.08078400  | -7.13908000  | -14.97069600 |
| H | -12.69376500 | -7.31795600  | -14.03635100 | O | -7.62619100  | -8.42525300  | -14.78761700 |
| H | -8.56165400  | -8.94598400  | -12.17221700 | N | -3.86510600  | -5.66269900  | -15.68467400 |
| H | -7.83217800  | -10.02905200 | -7.65788800  | C | -3.07428100  | -6.67174200  | -16.43944600 |
| H | -6.57336600  | -8.99623700  | -8.38355200  | C | -2.05097000  | -7.38289000  | -15.54331400 |
| H | -7.49703500  | -10.40282600 | -10.54208200 | C | -2.43369800  | -5.79911900  | -17.53475800 |

|   |             |             |              |   |             |              |              |
|---|-------------|-------------|--------------|---|-------------|--------------|--------------|
| C | -2.12811400 | -4.47599900 | -16.81266500 | H | -2.55221100 | -8.02992800  | -14.82039400 |
| C | -3.30902300 | -4.30715300 | -15.84046300 | H | -1.40401900 | -8.01903500  | -16.15877700 |
| H | -3.01536500 | -3.90339800 | -14.86597700 | H | -5.13747100 | -7.94190900  | -15.44802900 |
| H | -4.08811300 | -3.64566300 | -16.23971300 | H | -8.57817800 | -8.32672200  | -14.58184400 |
| H | -1.18517500 | -4.55599200 | -16.26094500 | H | -7.24685700 | -6.76298900  | -15.99711400 |
| H | -2.03512800 | -3.62920700 | -17.49940600 | H | -7.51515400 | -6.40123400  | -14.28372300 |
| H | -1.54589000 | -6.26781400 | -17.96821600 | H | -5.87373500 | -7.47428900  | -12.64031800 |
| H | -3.15442500 | -5.63040900 | -18.34390300 | H | -5.21794400 | -8.88552800  | -11.15083600 |
| H | -3.74715000 | -7.41200500 | -16.87863300 | H | -5.48540700 | -10.45509000 | -11.96138300 |
| H | -1.41689900 | -6.66317900 | -15.01266700 | H | -3.84513300 | -9.96704400  | -11.55496200 |

### **SkDHPase.HYD-INT2-II**

|    |             |             |              |   |              |             |              |
|----|-------------|-------------|--------------|---|--------------|-------------|--------------|
| C  | -2.73099300 | -0.10103300 | -4.80017600  | H | -4.45394300  | 0.58517600  | -9.06832000  |
| C  | -3.57015200 | -0.23823900 | -6.02816100  | H | -8.77023500  | -4.57774300 | -3.70547400  |
| N  | -3.45159900 | 0.56831900  | -7.15350100  | H | -10.39320600 | -4.61942100 | -4.40033500  |
| C  | -4.55189600 | -1.13393800 | -6.35155400  | H | -7.05163200  | -3.97991600 | -5.87632900  |
| C  | -4.33470600 | 0.14196700  | -8.09022100  | H | -10.69436400 | -1.89729600 | -5.68363300  |
| N  | -5.01352200 | -0.89921400 | -7.63556500  | H | -9.36209800  | -0.97646900 | -7.66752100  |
| C  | -9.56332700 | -3.95540800 | -4.12768700  | H | -6.62841100  | 1.83833300  | -13.69396200 |
| C  | -9.04895800 | -3.21061600 | -5.30577800  | H | -7.07045500  | 0.26233500  | -17.07118700 |
| N  | -9.76713100 | -2.20843100 | -5.93880600  | H | -7.59644600  | -2.23068700 | -16.77545500 |
| C  | -7.88806300 | -3.31550500 | -6.02259400  | H | -6.98857000  | -3.06343000 | -14.46388000 |
| C  | -9.04896200 | -1.75329000 | -6.98878500  | H | -0.92748100  | -2.41262300 | -9.65459900  |
| N  | -7.90061600 | -2.40869800 | -7.06565400  | H | -0.17748500  | -3.17753800 | -11.05727100 |
| C  | -6.95819000 | 2.60919700  | -10.69330100 | H | -3.61871400  | -1.98967800 | -10.09695300 |
| N  | -7.46180000 | 1.57990600  | -9.81872400  | H | -1.15555500  | -1.80357600 | -13.48211600 |
| C  | -7.11052100 | 0.27840500  | -9.98183600  | H | -3.55733600  | -1.42755500 | -14.24783300 |
| O  | -6.17814200 | 0.04933400  | -10.83519700 | H | -5.87823900  | 2.50678700  | -10.81283300 |
| O  | -7.67989200 | -0.58402400 | -9.24488900  | H | -2.23179300  | -4.89998300 | -7.76225100  |
| C  | -5.99742500 | 1.45357600  | -14.50229200 | H | -2.47194300  | -3.26453500 | -7.10180400  |
| C  | -6.43651500 | 0.08921800  | -14.93414800 | H | -9.91211900  | -3.28020700 | -3.33680000  |
| N  | -6.43054400 | -1.02370100 | -14.09504900 | H | -4.96509100  | 1.44726700  | -14.13219800 |
| C  | -6.90487500 | -0.29578700 | -16.16269300 | H | -6.05307600  | 2.15456400  | -15.33977000 |
| C  | -6.88071500 | -2.04786600 | -14.81412000 | H | -7.17185200  | 3.58761100  | -10.25324100 |
| N  | -7.17128900 | -1.64810500 | -16.06727900 | H | -7.41653700  | 2.57605200  | -11.69071700 |
| C  | -0.67058900 | -2.26303000 | -10.70606800 | H | -3.02832100  | -0.85606200 | -4.06837400  |
| C  | -1.91061000 | -1.97162100 | -11.48206900 | H | -3.12863200  | -4.65444400 | -6.22942900  |
| N  | -1.94934600 | -1.78144500 | -12.85657900 | H | 0.06020500   | -1.44647300 | -10.76361600 |
| C  | -3.21479500 | -1.86968000 | -11.08579400 | H | -8.24185500  | 1.76771000  | -9.20704600  |
| C  | -3.23871800 | -1.58960300 | -13.22974400 | C | -15.72468000 | -5.23246900 | -8.59994400  |
| N  | -4.03112400 | -1.64083900 | -12.17341300 | C | -14.28154700 | -5.20648600 | -8.07992400  |
| C  | -2.92952200 | -4.25382000 | -7.22607800  | C | -13.31452000 | -4.37662800 | -8.94812700  |
| C  | -4.21762700 | -4.07824800 | -7.98694900  | C | -12.00816300 | -4.09655200 | -8.19273300  |
| O  | -5.25657900 | -3.70992200 | -7.41829700  | C | -13.02522700 | -5.05035300 | -10.29852800 |
| O  | -4.11763500 | -4.25399200 | -9.27688700  | C | -8.21562100  | -7.89747500 | -4.42193600  |
| Zn | -6.50353400 | -2.07973800 | -8.49113600  | C | -8.70812100  | -7.36563100 | -5.76581400  |
| Zn | -6.06624700 | -1.48583700 | -12.07040500 | S | -10.53157800 | -7.62628600 | -5.95943300  |
| H  | -1.66484100 | -0.24445100 | -5.01488600  | C | -9.38758500  | -8.98460200 | -11.44911700 |
| H  | -2.84615200 | 0.88268100  | -4.32882700  | C | -8.82996000  | -8.97015400 | -10.02467400 |
| H  | -4.93965500 | -1.94874100 | -5.76306400  | O | -9.23370500  | -8.18399600 | -9.15520800  |
| H  | -2.81977200 | 1.35057300  | -7.25844000  | C | -10.34767300 | -7.81630500 | -11.68419400 |

|   |              |              |              |   |              |              |              |
|---|--------------|--------------|--------------|---|--------------|--------------|--------------|
| C | -10.96812800 | -7.80742000  | -13.07248100 | H | -11.77252900 | -1.72863600  | -18.75056500 |
| O | -10.34031000 | -8.06430800  | -14.10241500 | H | -12.39552800 | -3.37798600  | -18.89867500 |
| N | -12.28293600 | -7.47034300  | -13.12169300 | H | -13.46107000 | -2.00034600  | -19.22219100 |
| N | -7.89655900  | -9.91357100  | -9.75603000  | N | -6.55558800  | -4.91086200  | -11.46530400 |
| C | -7.14862100  | -9.92147400  | -8.50393300  | C | -7.06147000  | -5.99916700  | -10.82239700 |
| H | -14.28415700 | -4.79205500  | -7.06224400  | O | -6.80318900  | -7.18748800  | -11.06176900 |
| H | -13.89479500 | -6.23144700  | -7.98679100  | N | -7.92048000  | -5.56069200  | -9.83625900  |
| H | -13.79817200 | -3.40891200  | -9.15413900  | C | -8.32049100  | -4.18957400  | -10.12945600 |
| H | -12.20768200 | -3.54010500  | -7.26776800  | C | -7.11429700  | -3.65495800  | -10.95902300 |
| H | -11.31226700 | -3.50544200  | -8.80112600  | O | -7.46680700  | -2.80014100  | -11.96805900 |
| H | -11.50357200 | -5.02851700  | -7.90799800  | H | -8.49253600  | -3.60379300  | -9.22646000  |
| H | -12.36600200 | -4.43448400  | -10.92147600 | H | -9.22418200  | -4.14958000  | -10.75173400 |
| H | -12.52720500 | -6.01606100  | -10.13576500 | H | -6.09300300  | -4.96619900  | -12.37401300 |
| H | -13.94558300 | -5.22853900  | -10.86697900 | H | -8.56670800  | -6.25823800  | -9.47345900  |
| H | -15.79883400 | -5.69529800  | -9.59058200  | O | -6.11892500  | -3.02625300  | -10.14985700 |
| H | -8.49586500  | -6.29667500  | -5.86415500  | H | -5.00061200  | -3.89929800  | -9.74050300  |
| H | -8.22322900  | -7.87482700  | -6.60024400  | C | -4.81770800  | -9.58761800  | -11.88278100 |
| H | -10.49497600 | -7.85100200  | -7.29022400  | C | -4.67529900  | -8.98437700  | -13.26798000 |
| H | -8.73163500  | -7.41574800  | -3.58290400  | O | -4.05647700  | -9.55299700  | -14.16615100 |
| H | -9.79942600  | -6.87149300  | -11.58879900 | N | -5.28563400  | -7.77440100  | -13.41119600 |
| H | -11.12119400 | -7.80994300  | -10.91102700 | C | -5.56594600  | -7.22845800  | -14.72620900 |
| H | -12.77699800 | -7.13602400  | -12.30753500 | C | -4.92073700  | -5.84278000  | -14.86122000 |
| H | -12.69841000 | -7.31099200  | -14.02974800 | O | -5.37675300  | -4.87352100  | -14.22003000 |
| H | -8.56413600  | -8.94104800  | -12.16941000 | C | -7.08687200  | -7.12718000  | -14.95561700 |
| H | -7.83644800  | -10.00862100 | -7.65923200  | O | -7.63298900  | -8.41375500  | -14.77660700 |
| H | -6.55954800  | -9.00367500  | -8.39154600  | N | -3.86876900  | -5.66827500  | -15.69232500 |
| H | -7.48729300  | -10.39457700 | -10.54521100 | C | -3.08109400  | -6.68371900  | -16.44129200 |
| H | -9.90472600  | -9.94013400  | -11.61084300 | C | -2.05097000  | -7.38289000  | -15.54331400 |
| H | -6.47915100  | -10.78418600 | -8.50285600  | C | -2.44939200  | -5.82181200  | -17.54988300 |
| H | -8.38452800  | -8.97545400  | -4.33847100  | C | -2.13908600  | -4.49117300  | -16.84353100 |
| H | -7.14113000  | -7.70632100  | -4.30850000  | C | -3.30825100  | -4.31618100  | -15.85760300 |
| H | -16.13322800 | -4.21734600  | -8.67702100  | H | -2.99954900  | -3.91290200  | -14.88744600 |
| H | -16.37500100 | -5.80143600  | -7.92635200  | H | -4.08947200  | -3.65133400  | -16.24685000 |
| C | -12.65108400 | -2.36154900  | -18.57849600 | H | -1.18882900  | -4.56324000  | -16.30331900 |
| C | -13.07136800 | -2.33149500  | -17.09750100 | H | -2.05711200  | -3.65055100  | -17.53914600 |
| C | -12.00905900 | -2.83457800  | -16.13832600 | H | -1.56452400  | -6.29391000  | -17.98571500 |
| C | -11.34914200 | -1.97577700  | -15.25242500 | H | -3.17653700  | -5.66171100  | -18.35496300 |
| C | -11.65523700 | -4.19375700  | -16.09895400 | H | -3.75446400  | -7.43052600  | -16.86805000 |
| C | -10.37975400 | -2.44040600  | -14.35724200 | H | -1.41557000  | -6.65625100  | -15.02366000 |
| C | -10.69053700 | -4.67769000  | -15.22072600 | H | -2.54782300  | -8.02309200  | -14.81140900 |
| C | -10.04434000 | -3.80079800  | -14.33416400 | H | -1.40579200  | -8.02444500  | -16.15502300 |
| O | -9.11539900  | -4.32879200  | -13.49016200 | H | -5.15060700  | -7.93837200  | -15.44210700 |
| H | -13.98315200 | -2.93348400  | -16.98049300 | H | -8.58539600  | -8.31714800  | -14.57173600 |
| H | -13.34872600 | -1.30598700  | -16.82306200 | H | -7.25704000  | -6.74567100  | -15.97928800 |
| H | -11.60349300 | -0.91733700  | -15.24816800 | H | -7.51631900  | -6.39193900  | -14.26271700 |
| H | -12.14954400 | -4.89259700  | -16.77173400 | H | -5.87539500  | -7.46936500  | -12.63220700 |
| H | -9.89647400  | -1.75573700  | -13.66414200 | H | -5.22905400  | -8.89180200  | -11.15078200 |
| H | -10.43146700 | -5.73239900  | -15.19762200 | H | -5.47452400  | -10.46292200 | -11.96605300 |
| H | -8.62069600  | -3.63547000  | -12.97412100 | H | -3.84202800  | -9.95656000  | -11.55195700 |

**SkDHPase.HYD-TS3-II**

|    |              |             |              |   |              |              |              |
|----|--------------|-------------|--------------|---|--------------|--------------|--------------|
| C  | -2.73099300  | -0.10103300 | -4.80017700  | H | -3.66780300  | -2.75898700  | -10.39641100 |
| C  | -3.66170900  | -0.18741200 | -5.95579900  | H | -1.12417600  | -0.71691900  | -13.04479100 |
| N  | -3.92064700  | 0.85880100  | -6.82884700  | H | -3.51970700  | -0.36348500  | -13.83357800 |
| C  | -4.41930200  | -1.22384100 | -6.42207500  | H | -5.96575700  | 2.44141200   | -11.11651700 |
| C  | -4.80108700  | 0.43369100  | -7.76705200  | H | -2.20467200  | -4.99513700  | -7.56757600  |
| N  | -5.11552700  | -0.83335700 | -7.54989500  | H | -2.48129200  | -3.25641300  | -7.30503000  |
| C  | -9.56332600  | -3.95540700 | -4.12768600  | H | -9.88868800  | -3.25747100  | -3.34660400  |
| C  | -9.04710400  | -3.24274700 | -5.32678900  | H | -4.93580100  | 1.51821700   | -14.23147700 |
| N  | -9.77227200  | -2.26192100 | -5.98620200  | H | -6.18510900  | 2.18686900   | -15.29139300 |
| C  | -7.88139400  | -3.35098100 | -6.03721400  | H | -6.96884500  | 3.59236100   | -10.21221800 |
| C  | -9.05273200  | -1.82072600 | -7.04160300  | H | -7.68054100  | 2.62090900   | -11.52034800 |
| N  | -7.89825500  | -2.46611400 | -7.09916500  | H | -2.70973000  | -1.05791300  | -4.27275300  |
| C  | -6.95819000  | 2.60920000  | -10.69330200 | H | -3.17668100  | -4.42814900  | -6.17541700  |
| N  | -7.25319900  | 1.59999200  | -9.70472000  | H | -0.15271900  | -1.39487600  | -10.27891900 |
| C  | -7.25828200  | 0.27514900  | -10.08517100 | H | -7.87674600  | 1.83046800   | -8.94336100  |
| O  | -6.77726500  | 0.05345500  | -11.24359800 | C | -15.72469300 | -5.23245900  | -8.59994400  |
| O  | -7.69325300  | -0.56135300 | -9.23916900  | C | -14.28152900 | -5.20650000  | -8.07992600  |
| C  | -5.99742700  | 1.45357800  | -14.50229200 | C | -13.26492900 | -4.57630900  | -9.05222100  |
| C  | -6.37706900  | 0.07786200  | -14.97014200 | C | -11.91740100 | -4.34872900  | -8.35363600  |
| N  | -6.35689700  | -1.05774400 | -14.16038100 | C | -13.07933700 | -5.41743300  | -10.32542500 |
| C  | -6.79160200  | -0.29306300 | -16.22328100 | C | -8.21562000  | -7.89747800  | -4.42194100  |
| C  | -6.74437100  | -2.07598500 | -14.91899700 | C | -8.67140200  | -7.39938500  | -5.79124700  |
| N  | -7.01176300  | -1.65542300 | -16.17226600 | S | -10.44741800 | -7.82574500  | -6.09321400  |
| C  | -0.67058800  | -2.26303000 | -10.70606800 | C | -9.34316400  | -9.21926800  | -11.52109600 |
| C  | -1.91919800  | -1.87372900 | -11.42424200 | C | -8.84824500  | -9.10462100  | -10.08514300 |
| N  | -1.93503200  | -1.08875700 | -12.56918600 | O | -9.19085600  | -8.18717000  | -9.32263400  |
| C  | -3.23797500  | -2.14474900 | -11.17093000 | C | -10.63997100 | -8.45616600  | -11.77660900 |
| C  | -3.22261200  | -0.91865000 | -12.95713500 | C | -10.70027800 | -7.85561900  | -13.18083200 |
| N  | -4.03680500  | -1.54384200 | -12.12483300 | O | -9.80563100  | -7.99838300  | -14.01051600 |
| C  | -2.92952300  | -4.25382200 | -7.22607800  | N | -11.83523500 | -7.15813900  | -13.45668100 |
| C  | -4.19726600  | -4.29263800 | -8.08270700  | N | -7.96048000  | -10.05072000 | -9.70742600  |
| O  | -5.25524100  | -3.78550400 | -7.63567500  | C | -7.14862200  | -9.92146800  | -8.50392600  |
| O  | -4.04890800  | -4.82787300 | -9.24055900  | H | -14.25811900 | -4.64201500  | -7.13712400  |
| Zn | -6.45188700  | -2.08028000 | -8.46612300  | H | -13.95487900 | -6.22596300  | -7.82906000  |
| Zn | -6.10014200  | -1.57156400 | -12.11581500 | H | -13.65837900 | -3.59353600  | -9.35589600  |
| H  | -1.70472300  | 0.12869700  | -5.11327900  | H | -12.03676700 | -3.69622100  | -7.47937800  |
| H  | -3.03656000  | 0.66765400  | -4.07937200  | H | -11.19144200 | -3.87670500  | -9.02757500  |
| H  | -4.51462000  | -2.22565800 | -6.03897500  | H | -11.48846800 | -5.29406700  | -7.99751600  |
| H  | -3.52902500  | 1.78903200  | -6.77248700  | H | -12.35558800 | -4.94882500  | -11.00411500 |
| H  | -5.21049200  | 1.06280100  | -8.54450100  | H | -12.70733200 | -6.41897400  | -10.06920000 |
| H  | -8.77867200  | -4.58588900 | -3.70187600  | H | -14.02133700 | -5.53640400  | -10.87268900 |
| H  | -10.41098600 | -4.60596400 | -4.37664100  | H | -15.82949100 | -5.85521100  | -9.49531800  |
| H  | -7.03534600  | -4.00021600 | -5.87412800  | H | -8.54929700  | -6.31479400  | -5.87213000  |
| H  | -10.69967700 | -1.94719400 | -5.73594200  | H | -8.08638200  | -7.85587600  | -6.59185500  |
| H  | -9.36572800  | -1.05639000 | -7.73488700  | H | -10.32235200 | -7.99655400  | -7.42731200  |
| H  | -6.57429900  | 1.73573800  | -13.61618900 | H | -8.82676800  | -7.47460700  | -3.61596900  |
| H  | -6.94687200  | 0.28197800  | -17.12310600 | H | -10.72324300 | -7.64214100  | -11.04672500 |
| H  | -7.39049900  | -2.23270800 | -16.91043800 | H | -11.51963100 | -9.09360900  | -11.62373700 |
| H  | -6.83648700  | -3.10050100 | -14.58740100 | H | -12.47441500 | -6.90297400  | -12.71695700 |
| H  | -0.91952100  | -2.94422900 | -9.88859000  | H | -11.84019400 | -6.58259200  | -14.29053700 |
| H  | 0.03733300   | -2.78191700 | -11.36388100 | H | -8.55646100  | -8.79407700  | -12.15634100 |

|   |              |              |              |   |             |              |              |
|---|--------------|--------------|--------------|---|-------------|--------------|--------------|
| H | -7.77974400  | -9.95097800  | -7.61124500  | H | -5.65137300 | -5.04426000  | -11.94292100 |
| H | -6.58840500  | -8.98095000  | -8.51999600  | H | -8.73579300 | -6.32427300  | -9.83703600  |
| H | -7.67174700  | -10.72573300 | -10.40166600 | O | -6.17125400 | -2.73118700  | -10.24370600 |
| H | -9.43435600  | -10.27211300 | -11.81098300 | H | -5.06480000 | -4.87267900  | -10.04918500 |
| H | -6.44888900  | -10.75852700 | -8.46531600  | C | -4.81771100 | -9.58762000  | -11.88278000 |
| H | -8.28756100  | -8.98730400  | -4.35418700  | C | -4.73687300 | -9.05535300  | -13.30504100 |
| H | -7.17305700  | -7.60849600  | -4.23949000  | O | -4.02751100 | -9.58614200  | -14.15760200 |
| H | -16.07101300 | -4.22304500  | -8.85449300  | N | -5.48216000 | -7.93452500  | -13.53099000 |
| H | -16.40621600 | -5.63552900  | -7.84277500  | C | -5.42610100 | -7.19719500  | -14.77814800 |
| C | -12.65108300 | -2.36154900  | -18.57849500 | C | -4.71057600 | -5.85443100  | -14.56835800 |
| C | -12.98800900 | -2.52354300  | -17.08405200 | O | -5.13507200 | -5.05137600  | -13.71343500 |
| C | -11.85028000 | -3.04338900  | -16.22269500 | C | -6.83275700 | -6.89616800  | -15.35254100 |
| C | -11.27099700 | -2.25902500  | -15.21834800 | O | -7.51533900 | -8.07362900  | -15.70885700 |
| C | -11.35242500 | -4.34847100  | -16.38210400 | N | -3.67930500 | -5.51188000  | -15.36703000 |
| C | -10.25115700 | -2.74340500  | -14.39158900 | C | -2.93161800 | -6.38815600  | -16.30412900 |
| C | -10.33340600 | -4.85066400  | -15.57568700 | C | -2.05097000 | -7.38288900  | -15.54331400 |
| C | -9.77884000  | -4.05226400  | -14.55779400 | C | -2.13579800 | -5.35769100  | -17.12772300 |
| O | -8.80811400  | -4.60800400  | -13.78938100 | C | -1.79973700 | -4.25527000  | -16.10951700 |
| H | -13.84895100 | -3.20085500  | -16.99359400 | C | -3.05357800 | -4.18498300  | -15.22264800 |
| H | -13.32303100 | -1.55738000  | -16.68636100 | H | -2.83877300 | -3.98039500  | -14.16967300 |
| H | -11.63153000 | -1.24373300  | -15.06330700 | H | -3.75881100 | -3.41530400  | -15.56230100 |
| H | -11.77211100 | -4.98986100  | -17.15510400 | H | -0.92667600 | -4.54254500  | -15.51340400 |
| H | -9.83201400  | -2.11609700  | -13.60830900 | H | -1.57341200 | -3.29489600  | -16.58285800 |
| H | -9.95571400  | -5.86137600  | -15.70638100 | H | -1.25075600 | -5.80033800  | -17.59315800 |
| H | -8.36099400  | -3.97375300  | -13.16249200 | H | -2.76844200 | -4.95202600  | -17.92655000 |
| H | -11.83009400 | -1.64953100  | -18.72258100 | H | -3.63521200 | -6.92849100  | -16.94377300 |
| H | -12.34652900 | -3.31475800  | -19.02523800 | H | -1.37012300 | -6.86082000  | -14.86066300 |
| H | -13.52104400 | -1.99439500  | -19.13420500 | H | -2.64615000 | -8.09968400  | -14.97268200 |
| N | -6.07416500  | -4.96337300  | -11.00057300 | H | -1.44203600 | -7.95585500  | -16.25337200 |
| C | -6.91790800  | -6.08698900  | -10.72166100 | H | -4.90003600 | -7.84060100  | -15.48148500 |
| O | -6.59786700  | -7.25357900  | -10.93626100 | H | -8.22143700 | -8.21951400  | -15.05602900 |
| N | -8.06369900  | -5.64043900  | -10.18422500 | H | -6.69083600 | -6.28442000  | -16.25832500 |
| C | -8.19954200  | -4.19676200  | -10.14053900 | H | -7.39682200 | -6.28946200  | -14.63660600 |
| C | -6.93911500  | -3.65707400  | -10.90510500 | H | -5.96044600 | -7.52607200  | -12.73172700 |
| O | -7.23657100  | -3.19193900  | -12.14650000 | H | -4.14809200 | -9.00854400  | -11.23633200 |
| H | -8.23588600  | -3.84218700  | -9.10873600  | H | -5.82056400 | -9.50147900  | -11.46237700 |
| H | -9.10290200  | -3.86329200  | -10.66001200 | H | -4.48501600 | -10.62779400 | -11.88629500 |

**SkDHPase.HYD-EP-II**

|   |             |             |             |   |             |             |              |
|---|-------------|-------------|-------------|---|-------------|-------------|--------------|
| C | -2.73099300 | -0.10103300 | -4.80017600 | C | -6.95819000 | 2.60919900  | -10.69330200 |
| C | -3.67303300 | -0.19271100 | -5.94750800 | N | -7.22454600 | 1.51460100  | -9.78484100  |
| N | -3.95184900 | 0.84969100  | -6.81943200 | C | -7.11669200 | 0.20316400  | -10.18815100 |
| C | -4.41707500 | -1.23963100 | -6.41116300 | O | -6.57242600 | 0.04103100  | -11.33852300 |
| C | -4.82959500 | 0.40895000  | -7.75437600 | O | -7.51853200 | -0.68465400 | -9.38459200  |
| N | -5.12446000 | -0.86298300 | -7.53862700 | C | -5.99742500 | 1.45357800  | -14.50229300 |
| C | -9.56332800 | -3.95541100 | -4.12768300 | C | -6.27377900 | 0.10910400  | -15.10665900 |
| C | -9.06898700 | -3.29963800 | -5.37393800 | N | -6.22678400 | -1.07551800 | -14.37475100 |
| N | -9.80309700 | -2.34498200 | -6.06433200 | C | -6.58656000 | -0.20281900 | -16.40334800 |
| C | -7.91629300 | -3.44048100 | -6.10164800 | C | -6.49517200 | -2.07174100 | -15.21528400 |
| C | -9.09983800 | -1.95035800 | -7.15034800 | N | -6.71645900 | -1.57798000 | -16.44963200 |
| N | -7.94825800 | -2.59958000 | -7.19992100 | C | -0.67059000 | -2.26303000 | -10.70606900 |



|    |              |             |              |   |              |              |              |
|----|--------------|-------------|--------------|---|--------------|--------------|--------------|
| C  | -1.87959700  | -1.90431100 | -11.50536200 | C | -8.91637600  | -9.07267600  | -9.99997600  |
| N  | -1.84621400  | -1.15189900 | -12.67220300 | O | -9.26205100  | -8.20710300  | -9.18484000  |
| C  | -3.20510700  | -2.18564300 | -11.30724300 | C | -10.33022400 | -7.97499600  | -11.79331900 |
| C  | -3.11047300  | -1.00566800 | -13.13052700 | C | -11.06955700 | -8.15533300  | -13.10788700 |
| N  | -3.95990100  | -1.61892300 | -12.31806700 | O | -10.50896400 | -8.48436100  | -14.15707200 |
| C  | -2.92952000  | -4.25382000 | -7.22607500  | N | -12.40825200 | -7.93018400  | -13.07269300 |
| C  | -4.11432700  | -4.13346500 | -8.17144800  | N | -7.95543900  | -9.98493800  | -9.71537600  |
| O  | -5.21085500  | -3.70403900 | -7.64954300  | C | -7.14862200  | -9.92146500  | -8.50392800  |
| O  | -3.92544400  | -4.40266300 | -9.37258800  | H | -14.25066900 | -4.62408200  | -7.14846900  |
| Zn | -6.37656400  | -2.26695400 | -8.43911700  | H | -13.95983800 | -6.22316400  | -7.81227600  |
| Zn | -5.97324400  | -1.48294300 | -12.38117800 | H | -13.64715800 | -3.60702800  | -9.36539200  |
| H  | -1.71010900  | 0.13838600  | -5.12357400  | H | -11.98434600 | -3.77256900  | -7.51805800  |
| H  | -3.03506000  | 0.66223100  | -4.07288800  | H | -11.18900900 | -3.93574100  | -9.09584900  |
| H  | -4.49007600  | -2.24437200 | -6.03171100  | H | -11.47594500 | -5.36653200  | -8.08459500  |
| H  | -3.57149400  | 1.78478900  | -6.76761100  | H | -12.39909500 | -5.01023500  | -11.03771800 |
| H  | -5.24207100  | 1.03174700  | -8.53434100  | H | -12.80975800 | -6.45921500  | -10.09657000 |
| H  | -8.76587600  | -4.55659700 | -3.68404300  | H | -14.08819700 | -5.51352400  | -10.89160600 |
| H  | -10.40805800 | -4.62436500 | -4.33269300  | H | -15.83645900 | -5.88316600  | -9.47411000  |
| H  | -7.06441000  | -4.07970500 | -5.92787100  | H | -8.52987400  | -6.33895400  | -5.90226900  |
| H  | -10.72765900 | -2.02125800 | -5.81495100  | H | -8.20942200  | -7.92482100  | -6.59830300  |
| H  | -9.42348100  | -1.20678000 | -7.86186800  | H | -10.48143300 | -7.93069000  | -7.31142900  |
| H  | -6.62260400  | 1.62030700  | -13.61993400 | H | -8.74977200  | -7.41140400  | -3.59686800  |
| H  | -6.72814400  | 0.41886400  | -17.27372400 | H | -9.59893000  | -7.17547000  | -11.94687300 |
| H  | -6.98147900  | -2.13064200 | -17.25343100 | H | -11.00465500 | -7.66230500  | -10.99210000 |
| H  | -6.49366800  | -3.13234500 | -14.98338900 | H | -12.87208000 | -7.57551200  | -12.25010600 |
| H  | -0.96517700  | -2.95167500 | -9.91037700  | H | -12.92734200 | -7.97670300  | -13.93906200 |
| H  | 0.09142200   | -2.76358400 | -11.31561100 | H | -8.82876700  | -9.48996000  | -12.12465300 |
| H  | -3.64977400  | -2.80321300 | -10.53898600 | H | -7.78370200  | -10.01220500 | -7.61822200  |
| H  | -1.01587200  | -0.78956600 | -13.12100700 | H | -6.59484400  | -8.97740800  | -8.44545000  |
| H  | -3.36869800  | -0.47412300 | -14.03378900 | H | -7.62889200  | -10.57192700 | -10.46976900 |
| H  | -5.95766600  | 2.50650300  | -11.11855600 | H | -10.27276000 | -10.09169400 | -11.3040210  |
| H  | -2.19587400  | -4.96217000 | -7.61742900  | H | -6.44003800  | -10.75216100 | -8.51330500  |
| H  | -2.44690200  | -3.27237400 | -7.13559700  | H | -8.35467100  | -8.97768600  | -4.31440000  |
| H  | -9.88179400  | -3.21900500 | -3.38010400  | H | -7.14767500  | -7.67382200  | -4.30756300  |
| H  | -4.95206300  | 1.54660700  | -14.18116400 | H | -16.05850100 | -4.22785800  | -8.88819900  |
| H  | -6.19531700  | 2.24691700  | -15.22819800 | H | -16.41239100 | -5.60182600  | -7.83113400  |
| H  | -7.00663000  | 3.54984400  | -10.13707100 | C | -12.65108400 | -2.36154900  | -18.57849600 |
| H  | -7.67770100  | 2.66011900  | -11.52165300 | C | -13.08749600 | -2.42602900  | -17.10405700 |
| H  | -2.69622600  | -1.06021800 | -4.27777400  | C | -12.03162500 | -3.01633100  | -16.19202500 |
| H  | -3.24400200  | -4.56086900 | -6.22387600  | C | -11.17167500 | -2.20347500  | -15.44545100 |
| H  | -0.20529000  | -1.38287200 | -10.24473100 | C | -11.86116200 | -4.40605500  | -16.08868400 |
| H  | -7.84763500  | 1.66891600  | -9.00463300  | C | -10.18048700 | -2.74504500  | -14.62301000 |
| C  | -15.72468300 | -5.23247100 | -8.59994700  | C | -10.87803500 | -4.96766400  | -15.27953200 |
| C  | -14.28154500 | -5.20648400 | -8.07992000  | C | -10.03135400 | -4.13422200  | -14.53729100 |
| C  | -13.27080200 | -4.59999900 | -9.07287800  | O | -9.09485800  | -4.73114100  | -13.74071800 |
| C  | -11.90156600 | -4.40864000 | -8.40815700  | H | -14.00864300 | -3.01912000  | -17.03224300 |
| C  | -13.13759500 | -5.44165000 | -10.35170800 | H | -13.34533900 | -1.41610700  | -16.76051400 |
| C  | -8.21562100  | -7.89747600 | -4.42194500  | H | -11.28260100 | -1.12170100  | -15.49569100 |
| C  | -8.71477200  | -7.41021100 | -5.77970700  | H | -12.51418900 | -5.06516300  | -16.65785100 |
| S  | -10.52787500 | -7.72906800 | -5.97670700  | H | -9.53769400  | -2.09558200  | -14.03312000 |
| C  | -9.57942200  | -9.24098900 | -11.36794400 | H | -10.74854200 | -6.04399000  | -15.21188700 |

|   |              |             |              |   |             |              |              |
|---|--------------|-------------|--------------|---|-------------|--------------|--------------|
| H | -8.46230800  | -4.06994900 | -13.39086600 | O | -7.77162800 | -8.85854400  | -14.79641400 |
| H | -11.75501000 | -1.74065100 | -18.69484300 | N | -4.09684600 | -6.01587000  | -16.01891400 |
| H | -12.41472000 | -3.36008900 | -18.96330900 | C | -3.15856900 | -7.03832300  | -16.54791000 |
| H | -13.44302700 | -1.93592000 | -19.20546800 | C | -2.05097300 | -7.38288800  | -15.54331300 |
| N | -5.65941800  | -5.66883900 | -11.22004400 | C | -2.62877400 | -6.33741900  | -17.81260100 |
| C | -6.82173300  | -6.27521600 | -10.89213000 | C | -2.50651900 | -4.86530100  | -17.38128400 |
| O | -7.17275800  | -7.37816500 | -11.33888300 | C | -3.70254500 | -4.65806600  | -16.43308200 |
| N | -7.64035600  | -5.55849000 | -9.99741100  | H | -3.46125300 | -4.03785300  | -15.56186200 |
| C | -8.24399700  | -4.32128800 | -10.51649000 | H | -4.55356900 | -4.18170800  | -16.93511100 |
| C | -7.22460100  | -3.34487000 | -11.08072500 | H | -1.56248900 | -4.70149000  | -16.85103200 |
| O | -7.34357700  | -2.96952500 | -12.29341900 | H | -2.52870300 | -4.17156100  | -18.22708300 |
| H | -8.74343300  | -3.81488900 | -9.68267500  | H | -1.68261600 | -6.76408800  | -18.15764700 |
| H | -8.98830200  | -4.52186900 | -11.29552500 | H | -3.35922600 | -6.43530600  | -18.62459000 |
| H | -5.08378900  | -6.16132100 | -11.89262600 | H | -3.70586100 | -7.94893700  | -16.79821100 |
| H | -8.36827500  | -6.19496200 | -9.66828200  | H | -1.50820100 | -6.48680100  | -15.22048400 |
| O | -6.29496300  | -2.87262900 | -10.36631700 | H | -2.46904800 | -7.88943900  | -14.67219100 |
| H | -5.18026300  | -5.06302200 | -10.54250800 | H | -1.33320700 | -8.06864400  | -16.00827300 |
| C | -4.81770400  | -9.58762800 | -11.88278200 | H | -5.29425100 | -8.32616100  | -15.59020800 |
| C | -4.69766100  | -9.05917600 | -13.30695600 | H | -8.72779800 | -8.76499800  | -14.60565600 |
| O | -3.94691500  | -9.57830100 | -14.12748600 | H | -7.47918100 | -7.37450000  | -16.24161500 |
| N | -5.46092400  | -7.94952400 | -13.57528800 | H | -7.73844600 | -6.77817800  | -14.59329100 |
| C | -5.76018900  | -7.57061200 | -14.95600400 | H | -6.21111700 | -7.77618800  | -12.90313900 |
| C | -5.22686800  | -6.16004900 | -15.27988400 | H | -3.83488800 | -9.53948000  | -11.40136400 |
| O | -5.85054100  | -5.15719400 | -14.89496900 | H | -5.54998600 | -9.04562600  | -11.28342700 |
| C | -7.28434500  | -7.58863700 | -15.17593400 | H | -5.08934900 | -10.64740400 | -11.94193600 |

### **SkDHPase.DHO-ES-II**

|   |             |            |             |    |             |             |             |
|---|-------------|------------|-------------|----|-------------|-------------|-------------|
| C | 3.55821900  | 7.90015000 | -1.60236800 | C  | -2.65667400 | 5.88202500  | -2.65181300 |
| C | 3.00992100  | 6.85447900 | -0.70132300 | C  | -2.77146300 | 5.02939800  | -1.44122800 |
| N | 2.50050000  | 7.07376300 | 0.57123800  | N  | -3.70671700 | 5.19255700  | -0.42747000 |
| C | 2.86103400  | 5.51567900 | -0.90998900 | C  | -2.00481700 | 3.97109000  | -1.04902500 |
| C | 2.07223700  | 5.88362300 | 1.07050600  | C  | -3.47418800 | 4.24863400  | 0.51947000  |
| N | 2.27074100  | 4.92142400 | 0.18733700  | N  | -2.44492600 | 3.49671300  | 0.17001800  |
| C | 7.21001600  | 0.98675500 | -0.67579100 | C  | 1.45478200  | 4.21004500  | -3.86703900 |
| C | 5.85499300  | 1.26203600 | -0.11427500 | C  | 1.25529500  | 3.15037400  | -2.77785500 |
| N | 5.33317000  | 0.60512000 | 0.98972400  | O  | 2.23124000  | 2.98540200  | -1.96677000 |
| C | 4.88136100  | 2.15084400 | -0.48669100 | O  | 0.14704800  | 2.57145200  | -2.71603100 |
| C | 4.10183900  | 1.09238600 | 1.23483800  | Zn | 1.96405300  | 2.84739100  | 0.13928800  |
| N | 3.79230600  | 2.03591000 | 0.36040600  | Zn | -1.30252600 | 2.19461200  | 1.27600400  |
| C | 0.21707900  | 4.88635400 | 4.69821300  | H  | 2.81222500  | 8.66472900  | -1.85692700 |
| N | 1.16912200  | 4.25886200 | 3.80790300  | H  | 4.42335900  | 8.41822200  | -1.16779900 |
| C | 0.76362400  | 3.27873100 | 2.91569100  | H  | 3.11813600  | 4.92213900  | -1.77062600 |
| O | -0.50722800 | 3.14847000 | 2.79329400  | H  | 2.46152500  | 7.95989100  | 1.05454200  |
| O | 1.66180200  | 2.65294500 | 2.29697100  | H  | 1.65368700  | 5.75032700  | 2.05911800  |
| C | -3.62393400 | 3.49549200 | 4.41702900  | H  | 7.37974900  | 1.61072700  | -1.55804200 |
| C | -4.00855700 | 2.26045800 | 3.65807100  | H  | 7.31946200  | -0.06242700 | -0.97418900 |
| N | -3.35886500 | 1.83207200 | 2.50289900  | H  | 4.87521200  | 2.84417800  | -1.31320700 |
| C | -5.04658500 | 1.40472400 | 3.93126000  | H  | 5.64033300  | -0.27570300 | 1.39001800  |
| C | -4.01170100 | 0.75730600 | 2.09025900  | H  | 3.47245200  | 0.71309600  | 2.01980800  |
| N | -5.03908700 | 0.46181800 | 2.92311400  | H  | -2.53810200 | 3.54405000  | 4.53859000  |

|   |             |             |             |   |             |             |             |
|---|-------------|-------------|-------------|---|-------------|-------------|-------------|
| H | -5.76766700 | 1.38475900  | 4.73412600  | C | -2.82928200 | -5.07302200 | 6.28399400  |
| H | -5.62792200 | -0.35643200 | 2.85764400  | C | -2.58168400 | -4.36650400 | 4.97582800  |
| H | -3.79371400 | 0.19286800  | 1.19483900  | C | -2.26700500 | -3.00360000 | 4.95477500  |
| H | -1.86093200 | 5.48578600  | -3.28751000 | C | -2.83215200 | -5.00833300 | 3.75616000  |
| H | -3.57991500 | 5.89712400  | -3.24588800 | C | -2.26073300 | -2.28041400 | 3.76481200  |
| H | -1.18335100 | 3.51935900  | -1.58632500 | C | -2.82892900 | -4.30796800 | 2.55383900  |
| H | -4.43967100 | 5.88706400  | -0.39611700 | C | -2.57972900 | -2.93070400 | 2.56694400  |
| H | -4.05859500 | 4.13594900  | 1.41871900  | O | -2.67636100 | -2.26346700 | 1.38247000  |
| H | -0.60385100 | 5.31171400  | 4.11752900  | H | -2.62555400 | -6.14692700 | 6.18910900  |
| H | 0.76250000  | 4.04821700  | -4.69718600 | H | -2.16050300 | -4.69046600 | 7.06561600  |
| H | 1.25401300  | 5.19917400  | -3.43524100 | H | -2.04616200 | -2.49087900 | 5.88909500  |
| H | 8.00342700  | 1.20841900  | 0.04939200  | H | -3.05382700 | -6.07353200 | 3.74867100  |
| H | -3.93214400 | 4.40999400  | 3.89194700  | H | -2.02291600 | -1.21950400 | 3.75819700  |
| H | -4.09691900 | 3.50536800  | 5.40365100  | H | -3.01533400 | -4.80207000 | 1.60455700  |
| H | 0.71747000  | 5.69422500  | 5.24234200  | H | -2.37036600 | -1.34225100 | 1.49289800  |
| H | -0.21351700 | 4.19035200  | 5.43232000  | H | -4.50725300 | -3.78950100 | 6.82351700  |
| H | 3.88687000  | 7.43582800  | -2.53558600 | H | -4.97481800 | -5.24847700 | 5.93982000  |
| H | 2.48495900  | 4.21158500  | -4.23694700 | H | -4.52072900 | -5.35886800 | 7.65191500  |
| H | -2.40609400 | 6.92274000  | -2.40640700 | C | -1.89030900 | -2.17497700 | -5.38914800 |
| H | 2.12183500  | 4.14566500  | 4.12811600  | C | -3.20511200 | -2.24436100 | -4.64198500 |
| O | 0.20612500  | 2.05050800  | -0.00490100 | O | -4.28071300 | -2.28858000 | -5.24254200 |
| H | 0.04308600  | 2.00030900  | -0.97394000 | N | -3.08636900 | -2.21600400 | -3.29117300 |
| C | 6.31508100  | -0.81385000 | -4.33635500 | C | -4.24070900 | -2.26384500 | -2.41734600 |
| C | 5.10517600  | -0.61137900 | -3.42678000 | C | -4.40264900 | -0.89490800 | -1.73814000 |
| S | 5.04042600  | -1.77373400 | -1.99780800 | O | -3.49137800 | -0.45219900 | -1.00812400 |
| C | 0.63689200  | -5.48158400 | -3.01597100 | C | -4.08934800 | -3.36968200 | -1.34474800 |
| C | 1.60182700  | -4.39125400 | -3.48256200 | O | -3.94159600 | -4.63253300 | -1.94759400 |
| O | 2.54697400  | -3.99068100 | -2.79686300 | N | -5.53794400 | -0.18167700 | -1.90767800 |
| C | 0.83723200  | -5.86476100 | -1.54183800 | C | -6.68791500 | -0.46688700 | -2.80365700 |
| C | -0.22146400 | -5.28442400 | -0.60325900 | C | -6.39021900 | -0.08073300 | -4.25773900 |
| O | -1.43080700 | -5.36155500 | -0.86413600 | C | -7.79526600 | 0.39226200  | -2.16415700 |
| N | 0.24951700  | -4.78372600 | 0.55619600  | C | -7.04723400 | 1.65306800  | -1.69991300 |
| N | 1.40563700  | -3.92696000 | -4.74399600 | C | -5.69265200 | 1.11159000  | -1.21348800 |
| C | 2.17687600  | -2.79889700 | -5.24881800 | H | -4.84775800 | 1.76980600  | -1.43708200 |
| H | 5.11679600  | 0.38612800  | -2.97791100 | H | -5.68977500 | 0.94258300  | -0.13104800 |
| H | 4.16706700  | -0.69122200 | -3.98364100 | H | -6.90723700 | 2.34296700  | -2.53890100 |
| H | 4.40638800  | -2.79242900 | -2.61585600 | H | -7.57760600 | 2.19790700  | -0.91270200 |
| H | 7.24975800  | -0.72094200 | -3.77368600 | H | -8.60747600 | 0.60400000  | -2.86572500 |
| H | 1.84215200  | -5.58275300 | -1.21732400 | H | -8.22301100 | -0.13229700 | -1.30069400 |
| H | 0.74910200  | -6.95263400 | -1.43450400 | H | -6.94072400 | -1.52897900 | -2.74855600 |
| H | 1.22652500  | -4.47737800 | 0.67273500  | H | -6.09457000 | 0.97216800  | -4.33340100 |
| H | -0.43947800 | -4.41935900 | 1.20370300  | H | -5.60107300 | -0.70641900 | -4.68161900 |
| H | -0.39778600 | -5.16032700 | -3.18125300 | H | -7.29206300 | -0.22398600 | -4.86606800 |
| H | 3.24460300  | -3.02183300 | -5.18233600 | H | -5.09063500 | -2.50552800 | -3.05496800 |
| H | 1.97254700  | -1.88594800 | -4.67665400 | H | -3.05274300 | -4.96206400 | -1.71205500 |
| H | 0.52646900  | -4.14063500 | -5.19391800 | H | -4.99783700 | -3.35590500 | -0.71960400 |
| H | 0.80075000  | -6.35246200 | -3.66392800 | H | -3.24801800 | -3.12937900 | -0.69085400 |
| H | 1.91406500  | -2.63425100 | -6.29650700 | H | -2.15367400 | -2.23986900 | -2.87537600 |
| H | 6.30451800  | -1.80838300 | -4.79594500 | H | -1.86066000 | -1.23927100 | -5.95842400 |
| H | 6.32299800  | -0.06723700 | -5.14236700 | H | -1.01891500 | -2.21680900 | -4.73177600 |
| C | -4.29235500 | -4.85740300 | 6.70266900  | H | -1.85724800 | -2.99242500 | -6.11804000 |

|   |             |             |             |   |            |             |            |
|---|-------------|-------------|-------------|---|------------|-------------|------------|
| C | 5.97725100  | -5.48411300 | 3.40366300  | C | 2.99672900 | -2.33754700 | 1.07006600 |
| C | 6.31655400  | -4.53946000 | 2.24864900  | O | 3.78617100 | -1.72478900 | 1.82993800 |
| C | 7.22403600  | -3.35650200 | 2.63921900  | O | 2.88431700 | -3.57161400 | 0.86622000 |
| C | 7.59005800  | -2.54689900 | 1.38633600  | H | 1.28055400 | -0.09765400 | 1.92557000 |
| C | 6.57026300  | -2.45260200 | 3.69751800  | H | 5.39592600 | -6.34214600 | 3.04622800 |
| N | -0.65048900 | -0.92818800 | -0.55670500 | H | 6.88284300 | -5.87458200 | 3.88881500 |
| C | 0.15573600  | -1.83127000 | -1.30751700 | H | 5.37636000 | -4.98460500 | 4.17138500 |
| O | -0.32889000 | -2.33907700 | -2.32678600 | H | 5.38417800 | -4.15188900 | 1.81834000 |
| N | 1.36665200  | -2.07939200 | -0.81215800 | H | 6.81685000 | -5.11325200 | 1.45441600 |
| C | 1.98657600  | -1.39725500 | 0.32159900  | H | 6.67980000 | -2.18688700 | 0.89022100 |
| C | 0.91507000  | -0.92121700 | 1.31032300  | H | 8.22475500 | -1.68450800 | 1.63266400 |
| C | -0.37243900 | -0.49169700 | 0.67702000  | H | 5.58303600 | -2.12386200 | 3.35136700 |
| O | -1.25674800 | 0.12682400  | 1.34049200  | H | 6.43614600 | -2.97659600 | 4.65089000 |
| H | 2.54330200  | -0.53500000 | -0.05618300 | H | 7.19227200 | -1.56928900 | 3.89920600 |
| H | -1.60268000 | -0.76207800 | -0.91216300 | H | 8.13000300 | -3.15996800 | 0.65414300 |
| H | 1.92666300  | -2.77354900 | -1.30778600 | H | 8.15775500 | -3.76390300 | 3.06165100 |
| H | 0.63738900  | -1.73380800 | 1.99928500  |   |            |             |            |

### **SkDHPase.DHO-TS1-II**

|   |             |            |             |    |             |             |             |
|---|-------------|------------|-------------|----|-------------|-------------|-------------|
| C | 3.28246300  | 7.97180600 | -1.58003900 | O  | 2.10677600  | 3.01305400  | -1.98880000 |
| C | 2.58421000  | 6.91608500 | -0.79533300 | O  | 0.00393100  | 2.59589200  | -2.66531200 |
| N | 1.64421300  | 7.14931800 | 0.20140600  | Zn | 1.83162000  | 2.85315000  | 0.08320400  |
| C | 2.66559500  | 5.55652200 | -0.88163000 | Zn | -1.62457700 | 2.12506300  | 1.42611100  |
| C | 1.20599200  | 5.94863800 | 0.66484000  | H  | 2.58178400  | 8.59857000  | -2.14688700 |
| N | 1.80302700  | 4.96384900 | 0.02021200  | H  | 3.88230700  | 8.63693800  | -0.94549000 |
| C | 7.12402800  | 1.15229000 | -0.72813000 | H  | 3.25444300  | 4.95421300  | -1.55228900 |
| C | 5.82689400  | 1.56012200 | -0.12058500 | H  | 1.34042000  | 8.05328600  | 0.53449200  |
| N | 5.50469800  | 1.29928500 | 1.20265100  | H  | 0.47497200  | 5.83637400  | 1.45117800  |
| C | 4.72423700  | 2.18402300 | -0.63602900 | H  | 7.22981900  | 1.60543000  | -1.71833300 |
| C | 4.24184200  | 1.71057700 | 1.42775100  | H  | 7.18618700  | 0.06374000  | -0.85585200 |
| N | 3.73997200  | 2.27352500 | 0.34012500  | H  | 4.54574900  | 2.54669700  | -1.63602200 |
| C | 0.06240400  | 4.82235400 | 4.71723200  | H  | 5.97579700  | 0.62098400  | 1.78912700  |
| N | 1.02096300  | 4.26703800 | 3.79103900  | H  | 3.71577200  | 1.56925400  | 2.35549500  |
| C | 0.63330900  | 3.41058600 | 2.79151400  | H  | -2.66875000 | 3.52723300  | 4.53248700  |
| O | -0.63130100 | 3.36556500 | 2.56992500  | H  | -5.51834900 | 0.95056200  | 5.04166000  |
| O | 1.54132800  | 2.80151300 | 2.16351000  | H  | -5.19175000 | -0.89756400 | 3.29394300  |
| C | -3.74159100 | 3.33094000 | 4.44843400  | H  | -3.54835700 | -0.21885300 | 1.48710100  |
| C | -3.98617000 | 2.00240700 | 3.79597600  | H  | -2.03634200 | 5.46635200  | -3.21592500 |
| N | -3.34451800 | 1.58423500 | 2.63172200  | H  | -3.77944500 | 5.75930000  | -3.23901100 |
| C | -4.85415600 | 1.01865700 | 4.19392800  | H  | -1.31778900 | 3.48720500  | -1.50504300 |
| C | -3.83154300 | 0.38380500 | 2.33919500  | H  | -4.77460700 | 5.63072900  | -0.46134400 |
| N | -4.74859000 | 0.00985000 | 3.25634100  | H  | -4.37801900 | 3.88534200  | 1.35415000  |
| C | -2.88244100 | 5.79533300 | -2.60764800 | H  | -0.74212800 | 5.31945300  | 4.17049300  |
| C | -2.99257800 | 4.90997200 | -1.41622900 | H  | 0.50685300  | 4.11862900  | -4.63699500 |
| N | -3.99075200 | 4.99331300 | -0.45406900 | H  | 1.14846300  | 5.23444900  | -3.40323100 |
| C | -2.18152500 | 3.89316200 | -0.99671300 | H  | 7.97609700  | 1.47789600  | -0.11822600 |
| C | -3.75161800 | 4.05058300 | 0.49108400  | H  | -4.17775100 | 4.15712600  | 3.87091500  |
| N | -2.65691200 | 3.37242100 | 0.19017700  | H  | -4.18582600 | 3.35450800  | 5.44773000  |
| C | 1.26478400  | 4.24354000 | -3.86018200 | H  | 0.56477000  | 5.56300900  | 5.34727900  |
| C | 1.10676700  | 3.18293300 | -2.76952300 | H  | -0.39068500 | 4.06427200  | 5.37200600  |

|   |             |             |             |   |             |             |             |
|---|-------------|-------------|-------------|---|-------------|-------------|-------------|
| H | 3.95903000  | 7.49957200  | -2.29653700 | C | -1.91720700 | -2.21749900 | -5.41093900 |
| H | 2.26434700  | 4.20305800  | -4.30375700 | C | -3.20730400 | -2.27159700 | -4.61829100 |
| H | -2.71422900 | 6.84449000  | -2.33097900 | O | -4.30038400 | -2.39554100 | -5.17425400 |
| H | 1.98467300  | 4.17290000  | 4.07823800  | N | -3.03090500 | -2.14942500 | -3.27974700 |
| C | 6.25508000  | -0.64431400 | -4.39691300 | C | -4.12619700 | -2.32084500 | -2.34603700 |
| C | 5.44304100  | -1.21644900 | -3.23313800 | C | -4.40336300 | -0.98181300 | -1.64931200 |
| S | 6.48188200  | -2.31525400 | -2.17074000 | O | -3.56413000 | -0.50417700 | -0.86242400 |
| C | 0.48131500  | -5.18391700 | -2.90478000 | C | -3.79710800 | -3.41659600 | -1.31257500 |
| C | 1.53480900  | -4.23292200 | -3.48185300 | O | -3.65369100 | -4.63768200 | -1.99850300 |
| O | 2.56163800  | -3.94420600 | -2.87088700 | N | -5.56310400 | -0.32078900 | -1.88608200 |
| C | 0.58294800  | -5.21648000 | -1.37244900 | C | -6.69351900 | -0.68633100 | -2.78010200 |
| C | -0.35664600 | -6.21919400 | -0.73261400 | C | -6.46458300 | -0.25341900 | -4.23667000 |
| O | -1.58725100 | -6.15219700 | -0.81120800 | C | -7.86526700 | 0.05316100  | -2.10496000 |
| N | 0.23958600  | -7.23225300 | -0.04731500 | C | -7.22776400 | 1.36295600  | -1.61183900 |
| N | 1.30645800  | -3.77307400 | -4.74533200 | C | -5.82390700 | 0.93204700  | -1.15413500 |
| C | 2.16604200  | -2.73295000 | -5.29971600 | H | -5.04585100 | 1.67155800  | -1.36862700 |
| H | 5.04638600  | -0.40732100 | -2.61181100 | H | -5.78470600 | 0.73261500  | -0.07622100 |
| H | 4.59511900  | -1.80500100 | -3.59299100 | H | -7.15983400 | 2.08474700  | -2.43326200 |
| H | 5.51036600  | -2.53659700 | -1.23551700 | H | -7.79640600 | 1.83679500  | -0.80533000 |
| H | 7.10016400  | -0.04601700 | -4.03730100 | H | -8.70294600 | 0.21124600  | -2.79069700 |
| H | 0.30419700  | -4.23152200 | -0.99005900 | H | -8.23231600 | -0.53098400 | -1.25195800 |
| H | 1.62336500  | -5.39226200 | -1.08656600 | H | -6.84839200 | -1.76760300 | -2.74590200 |
| H | 1.23102900  | -7.23097600 | 0.13907700  | H | -6.26031000 | 0.82176000  | -4.30251800 |
| H | -0.34865600 | -7.86942900 | 0.47218900  | H | -5.63737000 | -0.80908400 | -4.68377400 |
| H | -0.52626200 | -4.88162100 | -3.20745200 | H | -7.36676000 | -0.46520200 | -4.82382300 |
| H | 3.20685800  | -3.05950900 | -5.25448100 | H | -4.97920500 | -2.65210400 | -2.93929100 |
| H | 2.07325000  | -1.79165800 | -4.74402700 | H | -2.89041200 | -5.12443800 | -1.62689400 |
| H | 0.36208300  | -3.83352400 | -5.09873600 | H | -4.62657500 | -3.46138000 | -0.58290600 |
| H | 0.66202800  | -6.18486700 | -3.32199500 | H | -2.89660000 | -3.13573800 | -0.75599700 |
| H | 1.88787400  | -2.56639000 | -6.34383100 | H | -2.06690800 | -2.18081600 | -2.93213400 |
| H | 6.65741300  | -1.44279100 | -5.03067000 | H | -1.99470700 | -1.42464100 | -6.16216200 |
| H | 5.62379000  | -0.00078300 | -5.02230100 | H | -1.03932900 | -2.03812000 | -4.78590100 |
| C | -4.17158600 | -5.05373900 | 6.67420800  | H | -1.80446100 | -3.16102200 | -5.95891900 |
| C | -2.67264500 | -5.09706500 | 6.33509800  | C | 6.09052700  | -5.37965300 | 3.30912000  |
| C | -2.36716200 | -4.37921400 | 5.04018600  | C | 6.40786700  | -4.11098700 | 2.50890900  |
| C | -2.02440300 | -3.02295900 | 5.02551400  | C | 6.78368200  | -2.88714100 | 3.36926600  |
| C | -2.49058500 | -5.03479400 | 3.80590100  | C | 7.23607300  | -1.73524300 | 2.45769100  |
| C | -1.82962400 | -2.33205600 | 3.82903000  | C | 5.62442600  | -2.42020500 | 4.26405100  |
| C | -2.30044200 | -4.36726300 | 2.60080700  | H | 5.90710100  | -6.22822700 | 2.63907800  |
| C | -1.97838000 | -3.00264500 | 2.60732000  | H | 6.92371600  | -5.65411100 | 3.97022700  |
| O | -1.82737900 | -2.38566200 | 1.40748700  | H | 5.19807900  | -5.25904400 | 3.93369700  |
| H | -2.34863000 | -6.14398000 | 6.26965500  | H | 5.55889900  | -3.84393500 | 1.86473600  |
| H | -2.10190900 | -4.64648500 | 7.15737500  | H | 7.24735100  | -4.32679300 | 1.83205800  |
| H | -1.90227200 | -2.49226600 | 5.96839400  | H | 6.40423200  | -1.46514800 | 1.79560700  |
| H | -2.74276300 | -6.09377700 | 3.78886100  | H | 7.53262700  | -0.85593400 | 3.04930700  |
| H | -1.54062900 | -1.28387800 | 3.83391900  | H | 4.78148400  | -2.09615500 | 3.64272000  |
| H | -2.38267100 | -4.88376900 | 1.64848500  | H | 5.28198500  | -3.21285400 | 4.93931300  |
| H | -1.61189200 | -1.42861800 | 1.51694000  | H | 5.93443600  | -1.57199300 | 4.88996100  |
| H | -4.51786400 | -4.01822800 | 6.77503200  | H | 8.09232100  | -2.02065300 | 1.83421000  |
| H | -4.76478100 | -5.52522800 | 5.88221100  | H | 7.63078500  | -3.17328700 | 4.01482600  |
| H | -4.38594500 | -5.57601100 | 7.61496500  | N | -0.52877800 | -0.57656900 | -0.75782800 |

|   |             |             |             |   |             |             |             |
|---|-------------|-------------|-------------|---|-------------|-------------|-------------|
| C | 0.23427300  | -1.52483400 | -1.44170100 | H | 2.09888700  | -2.36675800 | -1.51982700 |
| O | -0.32083300 | -2.23728600 | -2.30267400 | O | 0.15454600  | 1.73770500  | -0.10021600 |
| N | 1.52824300  | -1.62796300 | -1.10320900 | H | -0.00062400 | 1.77432600  | -1.08551500 |
| C | 2.18746400  | -0.79899500 | -0.10007700 | H | 0.92506700  | -1.29809700 | 1.56526400  |
| C | 1.18191100  | -0.40955000 | 0.97391600  | C | 3.43778500  | -1.54000800 | 0.49243000  |
| C | -0.13199400 | 0.08794300  | 0.40839500  | O | 3.87410500  | -1.05097400 | 1.56511000  |
| O | -1.11544200 | 0.26756800  | 1.28604700  | O | 3.87470800  | -2.49995900 | -0.18639300 |
| H | 2.57152700  | 0.10746600  | -0.58905500 | H | 1.59380400  | 0.32666700  | 1.66031700  |
| H | -1.53603600 | -0.61484400 | -0.92976100 |   |             |             |             |

### SkDHPase.DHO-INT1-II

|    |             |             |             |   |             |             |             |
|----|-------------|-------------|-------------|---|-------------|-------------|-------------|
| C  | 3.13878100  | 7.99783300  | -1.66533000 | H | 0.36012000  | 5.85479800  | 1.38571500  |
| C  | 2.46108200  | 6.94345900  | -0.86339400 | H | 7.22278400  | 1.73487600  | -1.67048300 |
| N  | 1.50610400  | 7.17197900  | 0.11965700  | H | 7.18976100  | 0.18805800  | -0.81546200 |
| C  | 2.57983600  | 5.58577300  | -0.92083700 | H | 4.55014300  | 2.66873600  | -1.59420000 |
| C  | 1.09561200  | 5.96996400  | 0.60413300  | H | 5.94915700  | 0.69319900  | 1.81403500  |
| N  | 1.72478200  | 4.98858700  | -0.01503600 | H | 3.67405900  | 1.60751000  | 2.36819900  |
| C  | 7.11822200  | 1.27561600  | -0.68296400 | H | -2.76684900 | 3.52456400  | 4.40436000  |
| C  | 5.81693000  | 1.66747700  | -0.07868700 | H | -5.53955400 | 0.87205300  | 5.07895500  |
| N  | 5.48104100  | 1.38065300  | 1.23541100  | H | -5.17043200 | -1.02155500 | 3.39035300  |
| C  | 4.71807400  | 2.29336800  | -0.59702700 | H | -3.57738300 | -0.34804000 | 1.53302300  |
| C  | 4.21260800  | 1.77680600  | 1.45218600  | H | -2.12094400 | 5.33002100  | -3.30866200 |
| N  | 3.72234400  | 2.35812200  | 0.36861200  | H | -3.86380600 | 5.62248900  | -3.34512400 |
| C  | -0.06662100 | 4.87032400  | 4.65032800  | H | -1.41132600 | 3.39119300  | -1.53054600 |
| N  | 0.87429100  | 4.30037900  | 3.71396800  | H | -4.87595300 | 5.56751200  | -0.58390700 |
| C  | 0.47484500  | 3.43802200  | 2.72453600  | H | -4.50257900 | 3.87482300  | 1.28363200  |
| O  | -0.78995300 | 3.38828500  | 2.51129400  | H | -0.88192500 | 5.35811000  | 4.11105500  |
| O  | 1.37903100  | 2.82377400  | 2.09394000  | H | 0.46503400  | 4.04678300  | -4.68203000 |
| C  | -3.83534600 | 3.29356400  | 4.37195900  | H | 1.10186500  | 5.19637400  | -3.47586200 |
| C  | -4.06184700 | 1.93459700  | 3.77805600  | H | 7.96604900  | 1.60489000  | -0.06902100 |
| N  | -3.42877300 | 1.49781300  | 2.61770600  | H | -4.32172900 | 4.08285700  | 3.78308500  |
| C  | -4.89016900 | 0.93573600  | 4.21959100  | H | -4.24032500 | 3.34172100  | 5.38694200  |
| C  | -3.87560700 | 0.27164900  | 2.36884000  | H | 0.44750300  | 5.62128300  | 5.25798300  |
| N  | -4.76546500 | -0.09886100 | 3.31177500  | H | -0.50563300 | 4.12255400  | 5.32610300  |
| C  | -2.96907000 | 5.67447800  | -2.71186000 | H | 3.83365100  | 7.52709700  | -2.36513900 |
| C  | -3.08530400 | 4.81894900  | -1.49865400 | H | 2.22137700  | 4.14535900  | -4.34830400 |
| N  | -4.09249600 | 4.93047600  | -0.54926100 | H | -2.80144100 | 6.72989500  | -2.46012600 |
| C  | -2.28038000 | 3.81159200  | -1.04324200 | H | 1.84289000  | 4.21007200  | 3.98576800  |
| C  | -3.86589600 | 4.01340500  | 0.42315700  | C | 6.31929900  | -0.59171700 | -4.33229300 |
| N  | -2.76954900 | 3.32505800  | 0.15301800  | C | 5.49434600  | -1.18379700 | -3.18721800 |
| C  | 1.22099100  | 4.19463500  | -3.90760900 | S | 6.54482500  | -2.21848900 | -2.07338400 |
| C  | 1.06740000  | 3.16259600  | -2.79283600 | C | 0.62393900  | -5.22501000 | -2.82214800 |
| O  | 2.05774600  | 3.03046800  | -1.99383500 | C | 1.67360900  | -4.27990800 | -3.41607200 |
| O  | -0.02486900 | 2.55399500  | -2.68834700 | O | 2.71097700  | -3.99964700 | -2.81965800 |
| Zn | 1.82192200  | 2.88351700  | 0.07200600  | C | 0.64722400  | -5.14375300 | -1.28612900 |
| Zn | -1.79839100 | 2.08319900  | 1.44098100  | C | -0.21410600 | -6.20121000 | -0.62658300 |
| H  | 2.42811100  | 8.59392900  | -2.25243400 | O | -1.44863100 | -6.20564900 | -0.67226600 |
| H  | 3.71613200  | 8.69233900  | -1.04143200 | N | 0.45856000  | -7.18845100 | 0.02539700  |
| H  | 3.19163100  | 4.98871000  | -1.57514300 | N | 1.43017800  | -3.82247500 | -4.67830200 |
| H  | 1.17552800  | 8.07428200  | 0.43115700  | C | 2.28381300  | -2.78073200 | -5.23825100 |

|   |             |             |             |   |             |             |             |
|---|-------------|-------------|-------------|---|-------------|-------------|-------------|
| H | 5.03972300  | -0.38497200 | -2.59285400 | H | -5.86681400 | 0.55649200  | -0.11330000 |
| H | 4.68723600  | -1.81594500 | -3.56582800 | H | -7.21222100 | 1.86405100  | -2.51218500 |
| H | 5.55397700  | -2.47906100 | -1.16820700 | H | -7.88652400 | 1.60681000  | -0.90087700 |
| H | 7.12392200  | 0.04961200  | -3.95447400 | H | -8.69834000 | -0.04700400 | -2.90504400 |
| H | 0.24741300  | -4.17154400 | -0.99022700 | H | -8.25621400 | -0.77103800 | -1.34953200 |
| H | 1.68563000  | -5.19248200 | -0.94639100 | H | -6.80126300 | -1.98357500 | -2.79177200 |
| H | 1.45247400  | -7.12962500 | 0.18806400  | H | -6.21718700 | 0.60501900  | -4.34962000 |
| H | -0.07690200 | -7.87117500 | 0.54396100  | H | -5.55831500 | -1.01854100 | -4.70191000 |
| H | -0.37805100 | -4.99055100 | -3.19508800 | H | -7.28700700 | -0.70280500 | -4.89537600 |
| H | 3.32498100  | -3.10692300 | -5.20099300 | H | -4.89800200 | -2.81665900 | -2.94965100 |
| H | 2.19387800  | -1.84013100 | -4.68065600 | H | -2.75110700 | -5.20103400 | -1.51909800 |
| H | 0.47260700  | -3.85306500 | -4.99847800 | H | -4.56732500 | -3.57976300 | -0.57916800 |
| H | 0.86878500  | -6.24417900 | -3.15376100 | H | -2.84741100 | -3.18722800 | -0.71356100 |
| H | 1.99805000  | -2.61366800 | -6.28037400 | H | -2.00896800 | -2.21005000 | -2.87480900 |
| H | 6.77825400  | -1.38003400 | -4.93964200 | H | -1.91605800 | -1.60458000 | -6.18034100 |
| H | 5.68100500  | 0.01328600  | -4.98826900 | H | -0.94779600 | -2.10771900 | -4.76476200 |
| C | -4.10450000 | -5.06565900 | 6.71562000  | H | -1.65086700 | -3.31909800 | -5.88956200 |
| C | -2.60353300 | -4.88056300 | 6.43211600  | C | 6.19056600  | -5.21852600 | 3.44006300  |
| C | -2.33340200 | -4.17918400 | 5.11796200  | C | 6.47771800  | -3.96408200 | 2.60728500  |
| C | -1.99964000 | -2.82192700 | 5.06471900  | C | 6.81710200  | -2.70899500 | 3.43690800  |
| C | -2.44124700 | -4.86880400 | 3.89940300  | C | 7.24851600  | -1.57218400 | 2.49710200  |
| C | -1.79341400 | -2.16385700 | 3.84964200  | C | 5.63865400  | -2.24629100 | 4.30854700  |
| C | -2.24239700 | -4.23469100 | 2.67847500  | H | 6.03184800  | -6.08929100 | 2.79260600  |
| C | -1.92268800 | -2.86790000 | 2.64405100  | H | 7.02806200  | -5.45330000 | 4.11094500  |
| O | -1.76153300 | -2.29416800 | 1.42624400  | H | 5.29279500  | -5.10456700 | 4.05823100  |
| H | -2.11811700 | -5.86590300 | 6.43447500  | H | 5.62453100  | -3.73615000 | 1.95360300  |
| H | -2.14819800 | -4.31245700 | 7.25343600  | H | 7.32539700  | -4.17540900 | 1.93932200  |
| H | -1.88643400 | -2.26328900 | 5.99252000  | H | 6.41482600  | -1.34275700 | 1.82203700  |
| H | -2.68171300 | -5.93066600 | 3.90795800  | H | 7.51923400  | -0.66982200 | 3.06627200  |
| H | -1.50669300 | -1.11534900 | 3.82980000  | H | 4.79143900  | -1.96746200 | 3.67116200  |
| H | -2.30796600 | -4.78117800 | 1.74172800  | H | 5.31391900  | -3.02588900 | 5.00731500  |
| H | -1.52505500 | -1.33158400 | 1.48202300  | H | 5.91992700  | -1.36950900 | 4.90823900  |
| H | -4.61542300 | -4.09645900 | 6.76356800  | H | 8.11598900  | -1.85273000 | 1.88720300  |
| H | -4.58402700 | -5.65325600 | 5.92434100  | H | 7.66540700  | -2.95659200 | 4.09661000  |
| H | -4.26917400 | -5.58357200 | 7.66841800  | N | -0.47867200 | -0.52659600 | -0.88517200 |
| C | -1.80844800 | -2.35505900 | -5.39049600 | C | 0.29088300  | -1.49764100 | -1.50548000 |
| C | -3.10318900 | -2.43000500 | -4.60386400 | O | -0.23381100 | -2.24962100 | -2.35931200 |
| O | -4.18462700 | -2.61205000 | -5.16872900 | N | 1.58714400  | -1.58278800 | -1.15134000 |
| N | -2.95721000 | -2.26326400 | -3.26632400 | C | 2.21814500  | -0.75586100 | -0.13046800 |
| C | -4.06453600 | -2.45209100 | -2.34880600 | C | 1.17645400  | -0.35681700 | 0.90501900  |
| C | -4.39027800 | -1.11532100 | -1.66709100 | C | -0.08009700 | 0.23428400  | 0.27168600  |
| O | -3.57426100 | -0.60286000 | -0.87966400 | O | -1.11271400 | 0.33948400  | 1.15934000  |
| C | -3.72020900 | -3.51751300 | -1.28788400 | H | 2.62421700  | 0.14841800  | -0.60830100 |
| O | -3.50810500 | -4.74577900 | -1.94163700 | H | -1.48668400 | -0.61528200 | -1.01464300 |
| N | -5.57403000 | -0.49946200 | -1.91181900 | H | 2.15877000  | -2.34146700 | -1.52574700 |
| C | -6.67022700 | -0.89916900 | -2.83060900 | O | 0.20976500  | 1.63226100  | -0.21855300 |
| C | -6.40672400 | -0.47281200 | -4.28227600 | H | 0.04605400  | 1.69467900  | -1.20895700 |
| C | -7.87750200 | -0.18264300 | -2.19448500 | H | 0.85810200  | -1.24935000 | 1.45463800  |
| C | -7.28495700 | 1.14383000  | -1.68967800 | C | 3.45154600  | -1.49040900 | 0.50259100  |
| C | -5.88344400 | 0.74900500  | -1.19347500 | O | 3.87706600  | -0.97374800 | 1.56811800  |
| H | -5.11850800 | 1.50657400  | -1.39210400 | O | 3.89793500  | -2.46994300 | -0.14143400 |

H 1.58849000 0.34503400 1.62772800

**SkDHPase.DHO-TS2-II**

|    |             |             |             |   |             |             |             |
|----|-------------|-------------|-------------|---|-------------|-------------|-------------|
| C  | 2.84069800  | 7.90212300  | -2.05673300 | H | -3.25706900 | -0.34572200 | 1.58586900  |
| C  | 2.19439100  | 6.80824300  | -1.26408600 | H | -2.30019500 | 5.17645600  | -3.42817200 |
| N  | 1.07988000  | 6.98607200  | -0.45090600 | H | -4.06092600 | 5.12263900  | -3.53292800 |
| C  | 2.48087800  | 5.47360800  | -1.16060700 | H | -1.34469600 | 3.41987400  | -1.51626700 |
| C  | 0.74502800  | 5.78807900  | 0.09450700  | H | -5.14630600 | 5.05250200  | -0.79832600 |
| N  | 1.57305300  | 4.84771100  | -0.32430200 | H | -4.56980700 | 3.50886600  | 1.15395800  |
| C  | 7.01370600  | 1.34087700  | -0.82170900 | H | -0.90206700 | 5.46677700  | 3.79623200  |
| C  | 5.75469000  | 1.78786300  | -0.18562800 | H | 0.26258600  | 3.66775200  | -4.84433600 |
| N  | 5.50437700  | 1.64776000  | 1.16728600  | H | 0.65726400  | 4.87739000  | -3.59874200 |
| C  | 4.61421900  | 2.32047400  | -0.71186000 | H | 7.89797300  | 1.72662600  | -0.29837800 |
| C  | 4.23117600  | 2.01218500  | 1.40211900  | H | -4.19542100 | 4.10824500  | 3.62447300  |
| N  | 3.66616600  | 2.45759200  | 0.28999000  | H | -4.54658400 | 3.40355100  | 5.21185500  |
| C  | -0.16934400 | 5.00930300  | 4.46359700  | H | 0.25706900  | 5.79002800  | 5.10167800  |
| N  | 0.88167400  | 4.40037200  | 3.69538400  | H | -0.69940500 | 4.29334600  | 5.10841500  |
| C  | 0.58949800  | 3.53906000  | 2.67867600  | H | 3.69493000  | 7.49738700  | -2.60507400 |
| O  | -0.63225600 | 3.52236900  | 2.28847000  | H | 1.96652200  | 4.12235500  | -4.51910300 |
| O  | 1.55263400  | 2.88562500  | 2.18512100  | H | -3.26931900 | 6.45301200  | -2.67470400 |
| C  | -3.89921100 | 3.32461900  | 4.33369100  | H | 1.80432400  | 4.30459100  | 4.09397000  |
| C  | -4.00526700 | 1.95389300  | 3.73092900  | C | 6.20072200  | -0.72433000 | -4.35961500 |
| N  | -3.26870400 | 1.52705700  | 2.62627200  | C | 5.47080100  | -1.24327800 | -3.12121100 |
| C  | -4.81668700 | 0.92611900  | 4.13733700  | S | 6.58110600  | -2.28497400 | -2.07640000 |
| C  | -3.64454300 | 0.27680400  | 2.38032200  | C | 0.71511500  | -5.96394000 | -3.11672500 |
| N  | -4.58194100 | -0.11892600 | 3.26578500  | C | 1.60864200  | -4.77558800 | -3.44665300 |
| C  | -3.22077800 | 5.37408700  | -2.87318600 | O | 2.39207500  | -4.29549600 | -2.62216300 |
| C  | -3.22658700 | 4.56992200  | -1.62354400 | C | -0.50763800 | -5.61114200 | -2.24180900 |
| N  | -4.27131600 | 4.55506000  | -0.70995300 | C | -0.30919900 | -5.37829100 | -0.74500200 |
| C  | -2.28852100 | 3.72607100  | -1.09719100 | O | -1.28929100 | -5.49366500 | 0.01046800  |
| C  | -3.93465400 | 3.72341000  | 0.30842700  | N | 0.92015600  | -5.06970400 | -0.29533600 |
| N  | -2.73597400 | 3.21382400  | 0.09978100  | N | 1.51638600  | -4.28320100 | -4.70752700 |
| C  | 0.98545300  | 3.94488300  | -4.07375000 | C | 2.20945800  | -3.05817000 | -5.08127200 |
| C  | 1.09257200  | 2.88435900  | -3.00014900 | H | 5.10459600  | -0.40740900 | -2.51685800 |
| O  | 2.08372900  | 2.78535300  | -2.28249300 | H | 4.60503800  | -1.84952400 | -3.39954000 |
| Zn | 1.72157300  | 2.80417800  | 0.15707600  | H | 5.61726400  | -2.54666800 | -1.13587200 |
| Zn | -1.59778400 | 2.07126500  | 1.34882400  | H | 7.06640200  | -0.11042400 | -4.08420700 |
| H  | 2.15102000  | 8.34232500  | -2.78788800 | H | -1.23737400 | -6.42298300 | -2.31484900 |
| H  | 3.21024200  | 8.71231400  | -1.41591100 | H | -1.00813000 | -4.71526900 | -2.62339800 |
| H  | 3.26740800  | 4.91507400  | -1.64072000 | H | 1.66672200  | -4.78661000 | -0.93524700 |
| H  | 0.60729600  | 7.86160500  | -0.27521800 | H | 0.99237400  | -4.78319200 | 0.67277700  |
| H  | -0.08050000 | 5.63448300  | 0.77488000  | H | 0.35030200  | -6.42668400 | -4.04154900 |
| H  | 7.05888300  | 1.69497400  | -1.85595200 | H | 3.28186500  | -3.17335800 | -4.90512900 |
| H  | 7.08336700  | 0.24506500  | -0.84632100 | H | 1.84749600  | -2.20922500 | -4.49123100 |
| H  | 4.38984400  | 2.57304300  | -1.73539700 | H | 0.76067400  | -4.60524200 | -5.29405400 |
| H  | 6.02428800  | 1.03138000  | 1.78079000  | H | 1.33894300  | -6.70926100 | -2.61129100 |
| H  | 3.73988300  | 1.93318300  | 2.35664600  | H | 2.03897300  | -2.86888700 | -6.14390000 |
| H  | -2.87151700 | 3.54384600  | 4.64066000  | H | 6.56405800  | -1.55025100 | -4.98151400 |
| H  | -5.52065600 | 0.85041300  | 4.95175700  | H | 5.52887800  | -0.10864000 | -4.97127900 |
| H  | -4.93519400 | -1.06259300 | 3.34505300  | C | -3.90534900 | -4.91276200 | 7.08820100  |



|   |             |             |             |   |             |             |             |
|---|-------------|-------------|-------------|---|-------------|-------------|-------------|
| C | -2.44614600 | -4.46171400 | 6.88891900  | H | -2.86694100 | -5.16004000 | -0.78578300 |
| C | -2.16354400 | -3.85763200 | 5.52671300  | H | -4.59979500 | -3.33028300 | -0.13494500 |
| C | -1.91571800 | -2.49069700 | 5.36395900  | H | -2.86284700 | -3.07267300 | -0.35628500 |
| C | -2.12701800 | -4.66008100 | 4.37303300  | H | -2.03945500 | -2.33551500 | -2.67957200 |
| C | -1.65180600 | -1.93282300 | 4.10834800  | H | -2.00827400 | -1.95970900 | -5.93239800 |
| C | -1.87210000 | -4.12870100 | 3.11410200  | H | -0.99990700 | -2.55425300 | -4.58111800 |
| C | -1.63732200 | -2.75015800 | 2.96843600  | H | -1.79887100 | -3.69401000 | -5.71788300 |
| O | -1.41365100 | -2.28886800 | 1.71339900  | C | 6.33111600  | -4.96328700 | 3.63085700  |
| H | -1.78845300 | -5.32736500 | 7.05011800  | C | 6.52638100  | -3.68706800 | 2.80644400  |
| H | -2.18622000 | -3.73436800 | 7.66901400  | C | 6.86962000  | -2.42815700 | 3.62906100  |
| H | -1.91232100 | -1.84152400 | 6.23857900  | C | 7.04549400  | -1.23627300 | 2.67328000  |
| H | -2.29157000 | -5.73260400 | 4.46469000  | C | 5.78902700  | -2.09538800 | 4.67022300  |
| H | -1.43177400 | -0.87238200 | 4.01261900  | H | 6.18279500  | -5.83040700 | 2.97669400  |
| H | -1.81893200 | -4.75603600 | 2.22836300  | H | 7.20586000  | -5.17038500 | 4.26233300  |
| H | -1.22811500 | -1.30940700 | 1.66709200  | H | 5.45635400  | -4.89884700 | 4.28768400  |
| H | -4.59497500 | -4.06599600 | 6.98725700  | H | 5.62848000  | -3.48461800 | 2.20636300  |
| H | -4.19208300 | -5.66256700 | 6.34211900  | H | 7.33731500  | -3.85398300 | 2.08323800  |
| H | -4.05037700 | -5.35318400 | 8.08215100  | H | 6.08021300  | -1.08467300 | 2.17158700  |
| C | -1.89469100 | -2.74558300 | -5.17710900 | H | 7.33903400  | -0.32885100 | 3.22392600  |
| C | -3.16516700 | -2.79959100 | -4.34056000 | H | 4.82595200  | -1.92275900 | 4.17331500  |
| O | -4.25395100 | -3.06492100 | -4.85853600 | H | 5.65599600  | -2.89865500 | 5.40345500  |
| N | -2.99317000 | -2.51213600 | -3.02594600 | H | 6.04806500  | -1.18439900 | 5.22600400  |
| C | -4.08659100 | -2.54958100 | -2.07206200 | H | 7.81010400  | -1.43411100 | 1.91220300  |
| C | -4.37440500 | -1.12859400 | -1.56333500 | H | 7.81699400  | -2.61349300 | 4.16129900  |
| O | -3.51036600 | -0.51051800 | -0.91932200 | O | 0.00289900  | 2.14728000  | -2.86653300 |
| C | -3.76606600 | -3.44335300 | -0.85472200 | N | -0.39821000 | -0.40065900 | -1.00539600 |
| O | -3.63540700 | -4.78083200 | -1.26919600 | C | 0.30037000  | -1.44118200 | -1.59147600 |
| N | -5.58963400 | -0.56538900 | -1.78220400 | O | -0.27667000 | -2.24903700 | -2.35947600 |
| C | -6.73110100 | -1.09665300 | -2.56661000 | N | 1.62707800  | -1.50847300 | -1.35053000 |
| C | -6.52114300 | -0.92938700 | -4.07596100 | C | 2.29824600  | -0.67844300 | -0.36126400 |
| C | -7.90292100 | -0.26178800 | -2.01268500 | C | 1.30815600  | -0.31419500 | 0.73705400  |
| C | -7.27244600 | 1.11419700  | -1.74209600 | C | 0.04108700  | 0.36173800  | 0.20240800  |
| C | -5.86578900 | 0.76900800  | -1.22679400 | O | -0.98104500 | 0.29030400  | 1.14010200  |
| H | -5.09523800 | 1.48015100  | -1.54071100 | O | 0.18631300  | 1.71367600  | -0.20875800 |
| H | -5.82723000 | 0.72120100  | -0.13043700 | H | 0.05120300  | 1.61154700  | -2.00798000 |
| H | -7.20892600 | 1.69055500  | -2.67197100 | C | 3.56188400  | -1.39747800 | 0.21291800  |
| H | -7.84312800 | 1.71073500  | -1.02283400 | O | 4.12401000  | -0.78085100 | 1.15190700  |
| H | -8.74614200 | -0.22280400 | -2.70872000 | O | 3.89068900  | -2.47923800 | -0.33833200 |
| H | -8.26100800 | -0.70057100 | -1.07313500 | H | 2.66320900  | 0.23772700  | -0.84737400 |
| H | -6.87343300 | -2.15579400 | -2.33430000 | H | 0.99444400  | -1.23347300 | 1.24235400  |
| H | -6.33112800 | 0.11996100  | -4.33281500 | H | 1.78298700  | 0.32362600  | 1.48388800  |
| H | -5.68935600 | -1.54266700 | -4.43218800 | H | 2.13187500  | -2.34261100 | -1.64871900 |
| H | -7.42358900 | -1.25126600 | -4.61110500 | H | -1.41112900 | -0.51584300 | -1.04814000 |
| H | -4.93886800 | -2.97608500 | -2.60119700 |   |             |             |             |

### ***S*kDHPase.DHO-INT2-II**

|   |            |            |             |   |            |            |             |
|---|------------|------------|-------------|---|------------|------------|-------------|
| C | 2.94614000 | 7.74089100 | -2.28737800 | C | 1.36608200 | 5.86119500 | 0.42951300  |
| C | 2.40231100 | 6.72445500 | -1.34439400 | N | 1.77422200 | 4.83110100 | -0.29172600 |
| N | 1.71958600 | 7.02447100 | -0.17381700 | C | 7.03023500 | 1.16851200 | -0.83369900 |
| C | 2.42621200 | 5.35924600 | -1.39019600 | C | 5.77168000 | 1.62311500 | -0.20130900 |

|    |             |             |             |   |             |             |             |
|----|-------------|-------------|-------------|---|-------------|-------------|-------------|
| N  | 5.49910200  | 1.43987700  | 1.14281800  | H | 0.25744200  | 5.96687200  | 4.84818200  |
| C  | 4.65245900  | 2.20630500  | -0.72050500 | H | -0.51059900 | 4.37549200  | 5.04604200  |
| C  | 4.23609000  | 1.83612600  | 1.37902600  | H | 3.44360200  | 7.23686100  | -3.11978300 |
| N  | 3.69822800  | 2.33451200  | 0.27588700  | H | 2.04103300  | 3.89165300  | -4.61518300 |
| C  | -0.12153800 | 5.09165600  | 4.30916600  | H | -3.06849500 | 6.35698400  | -2.94408500 |
| N  | 0.93235100  | 4.54787400  | 3.49503100  | H | 1.88169500  | 4.58306400  | 3.84166900  |
| C  | 0.64631200  | 3.43802100  | 2.72675000  | C | 6.20185000  | -0.99549800 | -4.30841400 |
| O  | -0.59325700 | 3.17032200  | 2.61292500  | C | 5.43923000  | -1.44394800 | -3.06260800 |
| O  | 1.63030400  | 2.85127300  | 2.19599900  | S | 6.49801300  | -2.49702700 | -1.97707700 |
| C  | -3.87240000 | 3.45160400  | 4.21854200  | C | 0.51051000  | -6.01902300 | -2.88801600 |
| C  | -4.02100500 | 2.07311100  | 3.63595200  | C | 1.45546000  | -4.88393500 | -3.25696200 |
| N  | -3.31036500 | 1.61473100  | 2.52724300  | O | 2.21171600  | -4.36619600 | -2.42910000 |
| C  | -4.85825600 | 1.07242400  | 4.05912000  | C | -0.69925100 | -5.56942500 | -2.03783400 |
| C  | -3.72511200 | 0.37619500  | 2.29545000  | C | -0.50275900 | -5.33724000 | -0.53973000 |
| N  | -4.66631500 | 0.01420300  | 3.19292600  | O | -1.48354100 | -5.44600500 | 0.21506700  |
| C  | -3.14483700 | 5.26638200  | -3.04622900 | N | 0.72594000  | -5.02484800 | -0.09235200 |
| C  | -3.10322900 | 4.57425200  | -1.73093600 | N | 1.43622800  | -4.47627000 | -4.54969400 |
| N  | -4.06557900 | 4.74943900  | -0.74601700 | C | 2.18310800  | -3.29945300 | -4.97120300 |
| C  | -2.20737700 | 3.68918900  | -1.19407800 | H | 5.10145100  | -0.57526700 | -2.48878600 |
| C  | -3.72820300 | 3.98346400  | 0.32093400  | H | 4.55185800  | -2.02231100 | -3.33163400 |
| N  | -2.60471100 | 3.33686200  | 0.07793400  | H | 5.51145300  | -2.71589700 | -1.05184500 |
| C  | 1.04637500  | 3.74671100  | -4.18671200 | H | 7.08962900  | -0.40950200 | -4.04305900 |
| C  | 1.10995500  | 2.65779100  | -3.10963300 | H | -1.48598400 | -6.32512200 | -2.11268500 |
| O  | 2.05608500  | 2.61157700  | -2.31877200 | H | -1.12820500 | -4.64555400 | -2.44210900 |
| Zn | 1.78202700  | 2.79665500  | 0.13844100  | H | 1.48078000  | -4.77047800 | -0.73492200 |
| Zn | -1.56019600 | 2.06546900  | 1.29920300  | H | 0.80192700  | -4.73841200 | 0.87544400  |
| H  | 2.15895700  | 8.38046600  | -2.70705800 | H | 0.13166300  | -6.50400000 | -3.79540300 |
| H  | 3.68489300  | 8.39610600  | -1.80855600 | H | 3.23578000  | -3.41907100 | -4.70415300 |
| H  | 2.86032800  | 4.71137100  | -2.13275200 | H | 1.79709600  | -2.39700800 | -4.48554200 |
| H  | 1.53310800  | 7.95001700  | 0.18582700  | H | 0.70556600  | -4.82380700 | -5.15294200 |
| H  | 0.86814700  | 5.80250500  | 1.38692900  | H | 1.09530400  | -6.76990700 | -2.34527500 |
| H  | 7.08355000  | 1.53025100  | -1.86492900 | H | 2.09757800  | -3.19955900 | -6.05601900 |
| H  | 7.09309900  | 0.07247700  | -0.86488200 | H | 6.53601300  | -1.85520700 | -4.90001800 |
| H  | 4.44696500  | 2.50498900  | -1.73574000 | H | 5.56234100  | -0.37190200 | -4.94600600 |
| H  | 6.00074300  | 0.79999900  | 1.74693500  | C | -3.99350000 | -4.69507700 | 7.22831300  |
| H  | 3.73318600  | 1.73866800  | 2.32540600  | C | -2.58846800 | -4.09673500 | 7.02156800  |
| H  | -2.81504100 | 3.70167300  | 4.34577200  | C | -2.31078800 | -3.58191500 | 5.62005300  |
| H  | -5.55619400 | 1.02355400  | 4.88083700  | C | -2.03571300 | -2.23255700 | 5.37262500  |
| H  | -5.04150100 | -0.91919800 | 3.29010500  | C | -2.27723700 | -4.45422400 | 4.51797500  |
| H  | -3.35475800 | -0.26266400 | 1.50524400  | C | -1.74209500 | -1.75902600 | 4.08841800  |
| H  | -2.30804100 | 4.92930200  | -3.66335200 | C | -1.99577800 | -4.00675000 | 3.23227500  |
| H  | -4.06784900 | 5.04969800  | -3.59896600 | C | -1.72597200 | -2.64571600 | 3.00201500  |
| H  | -1.32821400 | 3.24713800  | -1.63647700 | O | -1.46729600 | -2.27517200 | 1.72265500  |
| H  | -4.89016100 | 5.32872800  | -0.81834700 | H | -1.84491900 | -4.86394100 | 7.28167500  |
| H  | -4.31498600 | 3.90950300  | 1.22317200  | H | -2.43917100 | -3.27939700 | 7.73908500  |
| H  | -0.95656000 | 5.40945600  | 3.68104200  | H | -2.03129700 | -1.52852500 | 6.20365800  |
| H  | 0.33221000  | 3.49098700  | -4.97221400 | H | -2.46481600 | -5.51581000 | 4.67083800  |
| H  | 0.74057300  | 4.68620300  | -3.71253600 | H | -1.50306600 | -0.70999200 | 3.93238900  |
| H  | 7.91506000  | 1.54356800  | -0.30340600 | H | -1.95170600 | -4.68833200 | 2.38744300  |
| H  | -4.31649100 | 4.22329700  | 3.57505100  | H | -1.29429700 | -1.29979900 | 1.59279800  |
| H  | -4.36873100 | 3.50901300  | 5.19167900  | H | -4.77219900 | -3.94750500 | 7.03517000  |

|   |             |             |             |   |             |             |             |
|---|-------------|-------------|-------------|---|-------------|-------------|-------------|
| H | -4.17053700 | -5.53814400 | 6.55110100  | C | 6.50720300  | -3.79546000 | 2.87725000  |
| H | -4.11697700 | -5.05814700 | 8.25563900  | C | 6.75275800  | -2.45564600 | 3.60046400  |
| C | -1.91634400 | -2.93751600 | -5.09133200 | C | 7.21957000  | -1.39748500 | 2.58854200  |
| C | -3.18209900 | -2.94637000 | -4.25131900 | C | 5.50123300  | -1.95597300 | 4.33997400  |
| O | -4.27061600 | -3.25976800 | -4.73970500 | H | 6.14531600  | -5.91411400 | 3.23950900  |
| N | -3.00374000 | -2.56953400 | -2.95969700 | H | 7.08276300  | -5.12178700 | 4.51612100  |
| C | -4.10292500 | -2.46110500 | -2.02081400 | H | 5.33599200  | -4.85659200 | 4.39787600  |
| C | -4.31540800 | -0.98225300 | -1.66823400 | H | 5.66566100  | -3.67065200 | 2.18191000  |
| O | -3.38647500 | -0.32013300 | -1.18014100 | H | 7.38596300  | -4.02160500 | 2.25610200  |
| C | -3.84663300 | -3.25265400 | -0.72019300 | H | 6.43284800  | -1.25712600 | 1.83678800  |
| O | -3.83382700 | -4.63057700 | -1.00108700 | H | 7.42526600  | -0.43884800 | 3.08992600  |
| N | -5.53793200 | -0.42251200 | -1.84897600 | H | 4.69565100  | -1.76299400 | 3.62166600  |
| C | -6.71272900 | -1.00319200 | -2.54266000 | H | 5.14449600  | -2.68071000 | 5.08070000  |
| C | -6.52243400 | -1.02880000 | -4.06376800 | H | 5.71285800  | -1.02087500 | 4.87675600  |
| C | -7.84402600 | -0.06470100 | -2.07769600 | H | 8.13818800  | -1.70314500 | 2.07284100  |
| C | -7.16067400 | 1.30917500  | -1.97447900 | H | 7.55819200  | -2.61020200 | 4.33747700  |
| C | -5.75631600 | 0.97577100  | -1.44532800 | O | 0.07882200  | 1.84539100  | -3.08625300 |
| H | -4.96851400 | 1.61742100  | -1.85190000 | N | -0.25919100 | -0.09353200 | -1.31469700 |
| H | -5.69749200 | 1.05241500  | -0.35150400 | C | 0.36559100  | -1.28944800 | -1.76570500 |
| H | -7.09516200 | 1.77483900  | -2.96440700 | O | -0.23872200 | -2.05426800 | -2.54270900 |
| H | -7.69709000 | 2.00339100  | -1.31951200 | N | 1.63336100  | -1.47978200 | -1.37962700 |
| H | -8.69519900 | -0.07427100 | -2.76503400 | C | 2.28415900  | -0.68307100 | -0.34569800 |
| H | -8.20505100 | -0.37903600 | -1.09058800 | C | 1.23588000  | -0.28062300 | 0.68409100  |
| H | -6.88871300 | -2.02016400 | -2.17973200 | C | 0.01469600  | 0.44365600  | 0.09327500  |
| H | -6.31088200 | -0.02341200 | -4.44770000 | O | -1.09009400 | 0.24301000  | 0.89812600  |
| H | -5.71286300 | -1.70074400 | -4.35972000 | O | 0.15617900  | 1.83838000  | -0.07081900 |
| H | -7.44144700 | -1.38761600 | -4.54460100 | H | 0.08786000  | 1.13559300  | -2.32051500 |
| H | -4.96911200 | -2.89790200 | -2.51658600 | C | 3.46343600  | -1.49217600 | 0.29486700  |
| H | -3.06390600 | -5.02354800 | -0.53261400 | O | 3.98894300  | -0.95062300 | 1.29797400  |
| H | -4.66404200 | -3.00253100 | -0.01647600 | O | 3.76980000  | -2.56829900 | -0.28027600 |
| H | -2.91328400 | -2.91164800 | -0.25735300 | H | 2.72935500  | 0.20593900  | -0.80898100 |
| H | -2.06506100 | -2.28645400 | -2.66184500 | H | 0.87116700  | -1.19705700 | 1.15893300  |
| H | -2.06815800 | -2.25335800 | -5.93384700 | H | 1.67132300  | 0.33973800  | 1.46782900  |
| H | -1.02809700 | -2.64132300 | -4.53331900 | H | 2.09377300  | -2.36158700 | -1.61445900 |
| H | -1.78098600 | -3.93744800 | -5.52055700 | H | -1.27597900 | -0.20371300 | -1.40602700 |
| C | 6.25232400  | -4.98442600 | 3.81066000  |   |             |             |             |

### **SkDHPase.DHO-TS3-II**

|   |            |            |             |   |             |            |             |
|---|------------|------------|-------------|---|-------------|------------|-------------|
| C | 3.11098100 | 7.69216700 | -2.27182900 | C | -0.02110900 | 5.09777400 | 4.31623900  |
| C | 2.54370400 | 6.69906900 | -1.32345500 | N | 1.00744400  | 4.54585100 | 3.47384500  |
| N | 1.91550700 | 7.01209600 | -0.12638600 | C | 0.69812400  | 3.43836800 | 2.70520600  |
| C | 2.49641200 | 5.33755400 | -1.39528200 | O | -0.54826400 | 3.17507900 | 2.63139200  |
| C | 1.52297900 | 5.85586800 | 0.46774700  | O | 1.66203200  | 2.85464800 | 2.14227400  |
| N | 1.85457700 | 4.82231600 | -0.28663600 | C | -3.80138600 | 3.52730600 | 4.21589700  |
| C | 7.06946100 | 1.04498000 | -0.81081200 | C | -3.98475600 | 2.14827400 | 3.64553900  |
| C | 5.80426900 | 1.52152500 | -0.20315900 | N | -3.29161300 | 1.66838100 | 2.53534200  |
| N | 5.51736900 | 1.37100400 | 1.14264300  | C | -4.83971900 | 1.16787700 | 4.08048600  |
| C | 4.69383100 | 2.10437000 | -0.74372300 | C | -3.73343700 | 0.43745700 | 2.31344600  |
| C | 4.25676600 | 1.78814300 | 1.35978800  | N | -4.67574400 | 0.10065400 | 3.21946200  |
| N | 3.73304500 | 2.26592300 | 0.24189700  | C | -3.02279600 | 5.33083200 | -3.04639000 |

|    |             |             |             |   |             |             |             |
|----|-------------|-------------|-------------|---|-------------|-------------|-------------|
| C  | -3.00442600 | 4.63805600  | -1.73082000 | N | 1.38183800  | -4.49507800 | -4.54331600 |
| N  | -3.94300000 | 4.86999500  | -0.73472400 | C | 2.15071000  | -3.33128400 | -4.96177400 |
| C  | -2.15072800 | 3.70723400  | -1.20190400 | H | 5.12266800  | -0.65578400 | -2.46691500 |
| C  | -3.63383400 | 4.09231400  | 0.33188600  | H | 4.53408600  | -2.08604700 | -3.31221100 |
| N  | -2.55049700 | 3.38378800  | 0.07797900  | H | 5.47592900  | -2.80729300 | -1.03547700 |
| C  | 1.14239200  | 3.73440000  | -4.17730100 | H | 7.11288900  | -0.54032800 | -4.02292400 |
| C  | 1.11692200  | 2.64472100  | -3.08330600 | H | -1.56802500 | -6.36778900 | -2.13635200 |
| O  | 2.03951400  | 2.61993300  | -2.23997600 | H | -1.23564600 | -4.68553400 | -2.47238200 |
| Zn | 1.82356700  | 2.77625700  | 0.04149300  | H | 1.36889600  | -4.79467500 | -0.72961900 |
| Zn | -1.54295100 | 2.10187700  | 1.31791000  | H | 0.66781600  | -4.75611500 | 0.87213400  |
| H  | 2.34882300  | 8.38055400  | -2.65993600 | H | 0.06276200  | -6.52075300 | -3.80946100 |
| H  | 3.90178000  | 8.30052300  | -1.81418800 | H | 3.19696100  | -3.46007400 | -4.67421100 |
| H  | 2.87353900  | 4.68175800  | -2.16102000 | H | 1.76752900  | -2.41883400 | -4.49316600 |
| H  | 1.78694500  | 7.93878300  | 0.25478400  | H | 0.67590100  | -4.85768200 | -5.16655200 |
| H  | 1.05516900  | 5.80157300  | 1.44093200  | H | 1.00982600  | -6.78829000 | -2.34922400 |
| H  | 7.14281300  | 1.39325800  | -1.84540300 | H | 2.08589300  | -3.24039300 | -6.04867200 |
| H  | 7.12110800  | -0.05181100 | -0.82763700 | H | 6.52044700  | -1.96946300 | -4.88169200 |
| H  | 4.49721000  | 2.38703200  | -1.76567100 | H | 5.58639100  | -0.46072300 | -4.92417200 |
| H  | 6.01018500  | 0.74445800  | 1.76734000  | C | -4.08022400 | -4.61677900 | 7.22220700  |
| H  | 3.74546700  | 1.72093000  | 2.30436600  | C | -2.64803100 | -4.09304500 | 7.00095200  |
| H  | -2.73725900 | 3.76621000  | 4.30009900  | C | -2.36680200 | -3.57843000 | 5.60046700  |
| H  | -5.53298200 | 1.13844600  | 4.90704300  | C | -2.06510600 | -2.23418900 | 5.35650200  |
| H  | -5.07147200 | -0.82344300 | 3.32376000  | C | -2.36243200 | -4.44684900 | 4.49498400  |
| H  | -3.38181500 | -0.21415000 | 1.52531000  | C | -1.77315600 | -1.76196700 | 4.07163000  |
| H  | -2.21586900 | 4.94352800  | -3.67369400 | C | -2.08267100 | -4.00042800 | 3.20841400  |
| H  | -3.96477800 | 5.17009000  | -3.58611800 | C | -1.78535600 | -2.64486300 | 2.98236400  |
| H  | -1.30180400 | 3.21893500  | -1.65665000 | O | -1.52704600 | -2.27282200 | 1.70241600  |
| H  | -4.73352300 | 5.49583500  | -0.79868600 | H | -1.94312500 | -4.90212900 | 7.24012900  |
| H  | -4.21129600 | 4.05654200  | 1.24252300  | H | -2.44410900 | -3.29320600 | 7.72464200  |
| H  | -0.86535500 | 5.43143100  | 3.70882300  | H | -2.03784000 | -1.53409300 | 6.19033000  |
| H  | 0.45978700  | 3.48899400  | -4.99358500 | H | -2.57215900 | -5.50456400 | 4.64600000  |
| H  | 0.84146600  | 4.68820600  | -3.72909300 | H | -1.51227200 | -0.71792800 | 3.91714000  |
| H  | 7.94898500  | 1.41840500  | -0.27081400 | H | -2.06134300 | -4.67949300 | 2.36060300  |
| H  | -4.26415700 | 4.30038200  | 3.58727000  | H | -1.33880600 | -1.30006600 | 1.58230100  |
| H  | -4.25883200 | 3.59391700  | 5.20737100  | H | -4.81958000 | -3.82554400 | 7.04943900  |
| H  | 0.38193400  | 5.96440400  | 4.85173700  | H | -4.31237900 | -5.44041000 | 6.53766000  |
| H  | -0.40325300 | 4.38203900  | 5.05719200  | H | -4.20878500 | -4.98520000 | 8.24700400  |
| H  | 3.55039500  | 7.16965300  | -3.12525800 | C | -1.94105500 | -2.89365700 | -5.09168700 |
| H  | 2.16013100  | 3.84727900  | -4.56047000 | C | -3.21630100 | -2.90160700 | -4.26615500 |
| H  | -2.87929200 | 6.41474000  | -2.94580300 | O | -4.30544700 | -3.18032200 | -4.77251100 |
| H  | 1.96429700  | 4.56989200  | 3.80039500  | N | -3.04451600 | -2.55936600 | -2.96347300 |
| C  | 6.20969400  | -1.10216800 | -4.28836200 | C | -4.15048500 | -2.42320400 | -2.03697600 |
| C  | 5.43669200  | -1.53192900 | -3.04270600 | C | -4.31434000 | -0.94045600 | -1.67526400 |
| S  | 6.46763700  | -2.61473400 | -1.95958700 | O | -3.36292700 | -0.31329100 | -1.18209300 |
| C  | 0.42881300  | -6.03728600 | -2.89603200 | C | -3.93460700 | -3.23365100 | -0.74023600 |
| C  | 1.37635000  | -4.89916600 | -3.24994100 | O | -3.94965500 | -4.60890100 | -1.03315500 |
| O  | 2.11471600  | -4.37669000 | -2.40862700 | N | -5.51593900 | -0.33934400 | -1.85361100 |
| C  | -0.79390300 | -5.59917300 | -2.05859200 | C | -6.70720100 | -0.87803800 | -2.55368900 |
| C  | -0.61785100 | -5.35623200 | -0.55936000 | C | -6.51359200 | -0.90055100 | -4.07454200 |
| O  | -1.60985300 | -5.45724800 | 0.18156400  | C | -7.80876100 | 0.09377900  | -2.08605100 |
| N  | 0.60506000  | -5.04479600 | -0.09598500 | C | -7.08187900 | 1.44439600  | -1.97247100 |

|   |             |             |             |   |             |             |             |
|---|-------------|-------------|-------------|---|-------------|-------------|-------------|
| C | -5.69021500 | 1.06330600  | -1.44191800 | H | 7.31922200  | -4.10946900 | 2.30263700  |
| H | -4.88121600 | 1.68163800  | -1.84260300 | H | 6.37136300  | -1.33993800 | 1.90262900  |
| H | -5.63193900 | 1.13104200  | -0.34759700 | H | 7.34150100  | -0.53798900 | 3.18230000  |
| H | -6.99880300 | 1.91429800  | -2.95900900 | H | 4.60579300  | -1.86615100 | 3.65094300  |
| H | -7.59738800 | 2.15111100  | -1.31421200 | H | 5.02753100  | -2.80691300 | 5.10336400  |
| H | -8.65764900 | 0.11575000  | -2.77589500 | H | 5.60037800  | -1.14451500 | 4.93474200  |
| H | -8.18274700 | -0.21483600 | -1.10197700 | H | 8.07350700  | -1.78953200 | 2.16225300  |
| H | -6.91634500 | -1.89091000 | -2.19690100 | H | 7.45545200  | -2.72347400 | 4.40526600  |
| H | -6.27067800 | 0.10016100  | -4.45182900 | O | 0.10323600  | 1.84967900  | -3.10363100 |
| H | -5.72376000 | -1.59429900 | -4.37354400 | N | -0.27925500 | -0.07945400 | -1.33045200 |
| H | -7.44194400 | -1.22830700 | -4.55948900 | C | 0.34351200  | -1.30645300 | -1.77218900 |
| H | -5.02490800 | -2.82636200 | -2.54630700 | O | -0.27778200 | -2.07183300 | -2.52633600 |
| H | -3.18432100 | -5.01925300 | -0.57272600 | N | 1.60140600  | -1.49476600 | -1.37404100 |
| H | -4.75707400 | -2.97086200 | -0.04759900 | C | 2.25455200  | -0.70290300 | -0.33512300 |
| H | -3.00091400 | -2.91916600 | -0.25949100 | C | 1.21244200  | -0.30340000 | 0.70149600  |
| H | -2.10767900 | -2.28891800 | -2.65497800 | C | 0.00478100  | 0.45939900  | 0.13662300  |
| H | -1.04456800 | -2.69333400 | -4.50578300 | O | -1.10667400 | 0.25381600  | 0.91152400  |
| H | -1.85713600 | -3.85830300 | -5.60540200 | O | 0.16362800  | 1.83008400  | -0.03135600 |
| H | -2.04228100 | -2.13066000 | -5.87225900 | H | 0.01148700  | 0.96026700  | -2.22159000 |
| C | 6.16677800  | -5.09413100 | 3.82926300  | C | 3.42741100  | -1.53108200 | 0.29760100  |
| C | 6.43133800  | -3.89291000 | 2.91410600  | O | 3.95570400  | -1.00699800 | 1.30679700  |
| C | 6.66262600  | -2.56095900 | 3.65640800  | O | 3.71892400  | -2.60378700 | -0.29137900 |
| C | 7.14570800  | -1.49029200 | 2.66521200  | H | 2.70464400  | 0.18369500  | -0.79542400 |
| C | 5.39823300  | -2.07129600 | 4.38041500  | H | 0.83463400  | -1.22171200 | 1.16211600  |
| H | 6.07101900  | -6.01707900 | 3.24532200  | H | 1.66223200  | 0.29797500  | 1.49231300  |
| H | 6.98757900  | -5.23746300 | 4.54469100  | H | 2.06411600  | -2.37950400 | -1.60223900 |
| H | 5.24184600  | -4.97642700 | 4.40492200  | H | -1.29971600 | -0.20853600 | -1.38916800 |
| H | 5.59924800  | -3.76224500 | 2.20855400  |   |             |             |             |

### SkDHPase.DHO-EP-II

|   |             |            |             |    |             |            |             |
|---|-------------|------------|-------------|----|-------------|------------|-------------|
| C | 2.46166900  | 7.92992500 | -2.72486800 | C  | -5.39395000 | 1.21155800 | 3.73005900  |
| C | 1.90880500  | 6.96128000 | -1.74332100 | C  | -4.17568900 | 0.35615900 | 2.09030900  |
| N | 1.14998600  | 7.29928000 | -0.63158100 | N  | -5.15432400 | 0.07847300 | 2.97578600  |
| C | 1.99241900  | 5.60047500 | -1.70583200 | C  | -3.34099300 | 4.88055600 | -3.63564600 |
| C | 0.81400500  | 6.15688000 | 0.02152200  | C  | -3.41872000 | 4.21217000 | -2.30564800 |
| N | 1.30348000  | 5.10675100 | -0.61450600 | N  | -4.47604800 | 4.39249500 | -1.42360900 |
| C | 6.96123000  | 1.87812200 | -0.46238800 | C  | -2.55632000 | 3.36638100 | -1.65885500 |
| C | 5.58901300  | 2.21392800 | 0.00119400  | C  | -4.22933700 | 3.67661100 | -0.30300200 |
| N | 5.21335500  | 2.15867400 | 1.33342300  | N  | -3.06847300 | 3.04970100 | -0.41349400 |
| C | 4.45783500  | 2.58384600 | -0.67093300 | C  | 1.02816000  | 3.64457700 | -4.38345100 |
| C | 3.89759000  | 2.43100300 | 1.42092200  | C  | 0.85104700  | 2.73481700 | -3.16266900 |
| N | 3.40972900  | 2.71906500 | 0.22612600  | O  | 1.76769700  | 2.82331200 | -2.26042400 |
| C | -0.81998100 | 5.56686800 | 3.87742100  | Zn | 1.50026000  | 3.05059200 | -0.25775700 |
| N | 0.24513100  | 4.99776700 | 3.08993500  | Zn | -2.10325500 | 2.17382200 | 1.12662000  |
| C | 0.02886100  | 3.87423100 | 2.32112700  | H  | 1.67510300  | 8.50789700 | -3.22737900 |
| O | -1.20744900 | 3.56318400 | 2.16045000  | H  | 3.15186800  | 8.64639400 | -2.26091600 |
| O | 1.04349000  | 3.31414600 | 1.83398000  | H  | 2.48701400  | 4.92721900 | -2.38460400 |
| C | -4.40937200 | 3.60417600 | 3.70118400  | H  | 0.89915700  | 8.23453000 | -0.34333000 |
| C | -4.53894000 | 2.17406300 | 3.26023000  | H  | 0.26046200  | 6.13422100 | 0.94839700  |
| N | -3.77672400 | 1.61592900 | 2.23560500  | H  | 7.07659700  | 2.15186700 | -1.51511900 |

|   |             |             |             |   |             |             |             |
|---|-------------|-------------|-------------|---|-------------|-------------|-------------|
| H | 7.15807300  | 0.80157600  | -0.37755800 | H | 7.16821700  | -1.40781900 | -4.23305100 |
| H | 4.30597500  | 2.73860100  | -1.72773200 | H | 5.91931800  | -0.19501900 | -4.56817300 |
| H | 5.74422200  | 1.69328200  | 2.05912400  | C | -4.06815800 | -4.25115200 | 7.39160400  |
| H | 3.32735000  | 2.40403300  | 2.33436300  | C | -2.59201100 | -3.87407600 | 7.17155300  |
| H | -3.35873400 | 3.86636700  | 3.85599500  | C | -2.27332800 | -3.45960000 | 5.74883900  |
| H | -6.13191900 | 1.23346900  | 4.51691400  | C | -2.18002000 | -2.11267100 | 5.38191600  |
| H | -5.57545100 | -0.83118500 | 3.10476800  | C | -2.06632400 | -4.41993600 | 4.74546900  |
| H | -3.81144900 | -0.34685500 | 1.34797800  | C | -1.88707000 | -1.72608900 | 4.07123800  |
| H | -2.45337300 | 4.52413200  | -4.16428500 | C | -1.77838600 | -4.05811100 | 3.43353700  |
| H | -4.21320500 | 4.65653200  | -4.26237900 | C | -1.68255400 | -2.70338400 | 3.09032700  |
| H | -1.63342800 | 2.93081000  | -2.02463900 | O | -1.37335400 | -2.40322100 | 1.79345600  |
| H | -5.30398200 | 4.94545700  | -1.59635400 | H | -1.96344100 | -4.72949500 | 7.45211200  |
| H | -4.89677200 | 3.62740300  | 0.54361800  | H | -2.32379200 | -3.05978900 | 7.85699300  |
| H | -1.66935800 | 5.81249700  | 3.23607400  | H | -2.31922600 | -1.34259300 | 6.13893700  |
| H | 0.42663600  | 3.28187500  | -5.22007300 | H | -2.12202800 | -5.47686100 | 4.99861900  |
| H | 0.69639300  | 4.65819100  | -4.12495700 | H | -1.78384400 | -0.67503400 | 3.81439800  |
| H | 7.72736600  | 2.41654200  | 0.10944900  | H | -1.61233400 | -4.80777600 | 2.66541200  |
| H | -4.81130200 | 4.29905400  | 2.95205800  | H | -1.41219500 | -1.43408300 | 1.62985400  |
| H | -4.95717200 | 3.76773700  | 4.63348800  | H | -4.72717500 | -3.40471800 | 7.16405300  |
| H | -0.46244800 | 6.48856700  | 4.34745400  | H | -4.36278500 | -5.08358000 | 6.74238300  |
| H | -1.17750900 | 4.89387500  | 4.66977500  | H | -4.24783400 | -4.55209200 | 8.43056800  |
| H | 3.01682800  | 7.38842400  | -3.49481000 | C | -1.30991400 | -3.32371100 | -4.88476300 |
| H | 2.07946400  | 3.70650300  | -4.68180900 | C | -2.64685000 | -3.40797200 | -4.16340100 |
| H | -3.26638600 | 5.97168000  | -3.54291200 | O | -3.68606600 | -3.71092600 | -4.75088900 |
| H | 1.19709000  | 5.09983700  | 3.41380600  | N | -2.59842600 | -3.09648700 | -2.83271400 |
| C | 6.55037900  | -0.62439000 | -3.78073900 | C | -3.73544000 | -3.31878000 | -1.95166700 |
| C | 5.68003000  | -1.18617200 | -2.65767700 | C | -4.31567700 | -1.98060200 | -1.45681200 |
| S | 6.72239300  | -1.92591900 | -1.32271200 | O | -3.68142100 | -1.29520200 | -0.63563900 |
| C | 2.19706200  | -6.37811900 | -2.27109000 | C | -3.32584500 | -4.15583700 | -0.71361300 |
| C | 2.77794700  | -5.51038200 | -3.39064800 | O | -2.86645200 | -5.43053500 | -1.08258200 |
| O | 3.62853500  | -5.94515700 | -4.16445000 | N | -5.54325600 | -1.57015900 | -1.87337800 |
| C | 2.32299200  | -5.79295100 | -0.84758900 | C | -6.45863600 | -2.17325600 | -2.87475300 |
| C | 1.02831700  | -5.17756900 | -0.30895700 | C | -6.11573200 | -1.74677000 | -4.30812700 |
| O | -0.07653100 | -5.63332700 | -0.61745400 | C | -7.82415500 | -1.64517500 | -2.39507100 |
| N | 1.19645300  | -4.18247500 | 0.59469400  | C | -7.50752600 | -0.21757900 | -1.91777100 |
| N | 2.30783800  | -4.23217500 | -3.46493000 | C | -6.11288600 | -0.34872300 | -1.28063500 |
| C | 2.78776000  | -3.31599500 | -4.48477800 | H | -5.46499600 | 0.51438100  | -1.46947400 |
| H | 5.06107100  | -0.39665100 | -2.22075200 | H | -6.16832800 | -0.47017100 | -0.19127900 |
| H | 5.01448200  | -1.96199000 | -3.04295400 | H | -7.47705500 | 0.46908200  | -2.77066900 |
| H | 5.68068700  | -2.25843700 | -0.51495900 | H | -8.24812400 | 0.17087100  | -1.21141500 |
| H | 7.22030400  | 0.16219500  | -3.41461200 | H | -8.58151000 | -1.67886100 | -3.18395300 |
| H | 3.14627900  | -5.07409100 | -0.77568400 | H | -8.18390400 | -2.25232400 | -1.55515700 |
| H | 2.56543600  | -6.60665600 | -0.15091500 | H | -6.41386000 | -3.26241700 | -2.80371000 |
| H | 2.08044300  | -3.67699500 | 0.64175100  | H | -6.09784300 | -0.65449500 | -4.40530900 |
| H | 0.36225200  | -3.69699300 | 0.90986700  | H | -5.15093100 | -2.15762100 | -4.61021100 |
| H | 1.13647100  | -6.58293300 | -2.46337700 | H | -6.87293800 | -2.13792300 | -4.99888000 |
| H | 3.84856000  | -3.50656900 | -4.66337100 | H | -4.46680500 | -3.88391700 | -2.53070600 |
| H | 2.64881600  | -2.28842500 | -4.13743400 | H | -1.89700500 | -5.46116500 | -0.95460600 |
| H | 1.51523900  | -3.92966300 | -2.90064600 | H | -4.21978600 | -4.26513900 | -0.07816700 |
| H | 2.73259900  | -7.32699400 | -2.34142800 | H | -2.58579600 | -3.59399500 | -0.13254100 |
| H | 2.25929700  | -3.44049900 | -5.44068700 | H | -1.66088700 | -3.04483300 | -2.42087200 |

|   |             |             |             |   |             |             |             |
|---|-------------|-------------|-------------|---|-------------|-------------|-------------|
| H | -1.48787700 | -3.45640100 | -5.95334200 | O | -0.16456200 | 2.01939700  | -3.10117300 |
| H | -0.81859900 | -2.36400400 | -4.70232500 | N | -0.42425100 | -0.60527400 | -1.76798600 |
| H | -0.62928600 | -4.10432500 | -4.53039800 | C | 0.46135700  | -1.65067900 | -1.75942000 |
| C | 6.37536600  | -3.92238800 | 4.64101900  | O | 0.13450500  | -2.79244500 | -2.15562700 |
| C | 6.55539300  | -2.81313700 | 3.59810400  | N | 1.71092200  | -1.41947300 | -1.27707500 |
| C | 6.56637100  | -1.38484900 | 4.17977700  | C | 2.11858300  | -0.49856900 | -0.22338400 |
| C | 7.01988200  | -0.38401400 | 3.10568900  | C | 1.07879400  | -0.25148700 | 0.88317000  |
| C | 5.19364400  | -0.97281900 | 4.73504000  | C | -0.09303300 | 0.65592500  | 0.63606300  |
| H | 6.42949500  | -4.91184600 | 4.17252800  | O | -1.19054500 | 0.40262200  | 1.25614000  |
| H | 7.15830300  | -3.87534800 | 5.40936700  | O | -0.01862500 | 1.73125500  | -0.03645400 |
| H | 5.40675500  | -3.85609400 | 5.14931200  | H | -0.11727700 | 0.33306300  | -2.03746800 |
| H | 5.76618300  | -2.87736000 | 2.83605300  | C | 3.36884600  | -1.14737800 | 0.50855800  |
| H | 7.50455800  | -2.98205900 | 3.06990700  | O | 3.89240300  | -0.43504700 | 1.38948100  |
| H | 6.31425900  | -0.40843600 | 2.26604400  | O | 3.68230300  | -2.31872300 | 0.14688000  |
| H | 7.06432300  | 0.63652500  | 3.51839300  | H | 2.44220600  | 0.45545500  | -0.64806200 |
| H | 4.45483700  | -0.94535900 | 3.92497400  | H | 0.70629200  | -1.20278200 | 1.26744400  |
| H | 4.83770700  | -1.66409500 | 5.50723000  | H | 1.63934500  | 0.21988200  | 1.70248200  |
| H | 5.23949100  | 0.02640800  | 5.18964600  | H | 2.30574700  | -2.24839500 | -1.24300500 |
| H | 8.01848500  | -0.62427900 | 2.72126200  | H | -1.34182100 | -0.84981300 | -2.12056600 |
| H | 7.29802700  | -1.36154800 | 5.00386200  |   |             |             |             |

**SkDHPase.5FUH2-ES-II-L**

|   |             |             |             |    |             |             |             |
|---|-------------|-------------|-------------|----|-------------|-------------|-------------|
| C | 5.24174600  | 6.76225800  | -1.77819200 | N  | -1.58043000 | 3.87367300  | 0.09109900  |
| C | 4.44895300  | 5.92101900  | -0.84860100 | C  | 2.41936400  | 3.51250500  | -3.93302700 |
| N | 3.91780300  | 6.34075300  | 0.36194000  | C  | 1.99368700  | 2.58696900  | -2.78381100 |
| C | 4.05428200  | 4.62268200  | -0.97285500 | O  | 2.90482900  | 2.23255500  | -1.94889000 |
| C | 3.23407800  | 5.30557300  | 0.91269200  | O  | 0.78379800  | 2.28221400  | -2.68897400 |
| N | 3.29221900  | 4.25002700  | 0.11746300  | Zn | 2.56858100  | 2.31836200  | 0.16101400  |
| C | 7.31410900  | -0.72527700 | -0.50096200 | Zn | -0.81119400 | 2.39735400  | 1.29953200  |
| C | 6.11406600  | -0.03511400 | 0.06067500  | N  | -0.70522100 | -0.76490300 | -0.67933800 |
| N | 5.75811800  | -0.11602800 | 1.39871400  | C  | -0.02664300 | -1.68731300 | -1.52092900 |
| C | 5.14000900  | 0.74503800  | -0.50855000 | O  | -0.60731800 | -2.13706500 | -2.50538100 |
| C | 4.61840100  | 0.58727300  | 1.59264600  | N  | 1.21200100  | -2.03545000 | -1.13565000 |
| N | 4.21467500  | 1.11857600  | 0.45006200  | C  | 1.94512400  | -1.35928600 | -0.07890600 |
| C | 1.26463000  | 4.81180900  | 4.57174900  | C  | 1.01664500  | -0.94449600 | 1.04231400  |
| N | 2.08983500  | 3.94734500  | 3.75267800  | C  | -0.29744000 | -0.37062400 | 0.53478400  |
| C | 1.52121600  | 3.02587000  | 2.90228900  | O  | -1.06499100 | 0.25855500  | 1.30846200  |
| O | 0.25327300  | 3.12442400  | 2.76685300  | H  | 4.67339200  | 7.62683600  | -2.14115100 |
| O | 2.29167500  | 2.20887000  | 2.31704600  | H  | 6.16033500  | 7.14340600  | -1.31661700 |
| C | -2.78220700 | 4.26437700  | 4.27112300  | H  | 4.23923400  | 3.92499200  | -1.77105500 |
| C | -3.35046400 | 3.07719100  | 3.54277800  | H  | 4.02256400  | 7.25691000  | 0.77262800  |
| N | -2.73940500 | 2.39978000  | 2.48080800  | H  | 2.74328000  | 5.34167500  | 1.87421000  |
| C | -4.56181400 | 2.48641800  | 3.79805400  | H  | 7.45196600  | -0.43716000 | -1.54500000 |
| C | -3.58382400 | 1.44271000  | 2.11802800  | H  | 7.20874000  | -1.81429600 | -0.46117200 |
| N | -4.69411500 | 1.45946300  | 2.88756500  | H  | 5.01967700  | 1.06218700  | -1.53236800 |
| C | -1.24996800 | 6.07723400  | -2.86788800 | H  | 6.23756500  | -0.66166700 | 2.10041200  |
| C | -1.56243100 | 5.34155400  | -1.61435500 | H  | 4.11793700  | 0.71034500  | 2.54007100  |
| N | -2.50149700 | 5.72006400  | -0.66517100 | H  | -1.78432800 | 4.04299400  | 4.65917300  |
| C | -1.00846200 | 4.19491700  | -1.12367800 | H  | -5.31609500 | 2.70386000  | 4.53757300  |
| C | -2.48110700 | 4.81088200  | 0.34138600  | H  | -5.45445000 | 0.79817500  | 2.83211600  |

|   |             |             |             |   |             |             |             |
|---|-------------|-------------|-------------|---|-------------|-------------|-------------|
| H | -3.43348700 | 0.74786400  | 1.30510100  | H | 4.45708300  | -6.22821100 | 4.75378900  |
| H | -0.52131500 | 5.50115400  | -3.44104800 | H | 5.14833500  | -1.17887300 | -2.62002000 |
| H | -2.13423900 | 6.21849900  | -3.50013400 | H | 4.00528800  | -2.08054900 | -3.59456800 |
| H | -0.26449000 | 3.57707400  | -1.60080500 | H | 3.89445400  | -4.15013800 | -2.27451900 |
| H | -3.10502400 | 6.52812200  | -0.71106500 | H | 7.06465700  | -2.50849700 | -3.60489700 |
| H | -3.12343100 | 4.85462500  | 1.20643600  | H | 0.53315500  | -5.88075200 | -0.70550000 |
| H | 0.54104200  | 5.33394100  | 3.94444400  | H | -0.81571100 | -6.99759500 | -0.95399000 |
| H | 1.69412200  | 3.46925600  | -4.74690600 | H | -0.38737300 | -4.31152300 | 0.66049900  |
| H | 2.46045900  | 4.53993000  | -3.55300200 | H | -1.88532600 | -3.50455900 | 0.37520100  |
| H | 2.45381300  | -0.47296900 | -0.46789000 | H | -0.95891200 | -6.12538300 | -3.35802900 |
| H | 2.70741900  | -2.03853800 | 0.30743000  | H | 2.69094300  | -3.78087400 | -4.87155700 |
| H | 1.48026900  | -0.22589700 | 1.71938600  | H | 1.40671000  | -2.59427400 | -4.51826900 |
| H | 8.22706500  | -0.45376200 | 0.04063400  | H | 0.02139300  | -4.93963900 | -5.03764500 |
| H | -2.68496000 | 5.13821800  | 3.61621900  | H | 0.47056600  | -7.09352500 | -2.97216700 |
| H | -3.43363300 | 4.53749600  | 5.10395700  | H | 1.43987200  | -3.43999500 | -6.08432300 |
| H | 1.90242000  | 5.55094100  | 5.06388500  | H | 5.92328600  | -3.40765200 | -4.60537500 |
| H | 0.70975700  | 4.26552700  | 5.34540600  | H | 6.14603200  | -1.66859000 | -4.86941500 |
| H | 5.53053000  | 6.16736100  | -2.64664600 | H | 5.63181600  | -7.14952300 | 3.80680500  |
| H | 3.41523200  | 3.25532000  | -4.30322200 | H | 3.90217300  | -7.33015700 | 3.49509600  |
| H | -0.82288400 | 7.06807300  | -2.67203100 | C | -5.25258300 | -3.64378700 | 6.87880300  |
| H | 3.02226900  | 3.72072200  | 4.06580300  | C | -4.11001500 | -4.51209200 | 6.33098400  |
| H | -1.65414200 | -0.46627500 | -0.98080500 | C | -3.62500800 | -3.94537400 | 5.02058000  |
| H | 1.63192300  | -2.80824400 | -1.65302500 | C | -2.65645900 | -2.93610700 | 4.99432700  |
| O | 0.68289300  | 1.85088300  | 0.02840500  | C | -4.23780800 | -4.31014200 | 3.81456800  |
| H | 0.52444000  | 1.85346500  | -0.94299700 | C | -2.32884200 | -2.27943900 | 3.81012900  |
| C | 4.68240700  | -6.60615500 | 3.75142700  | C | -3.93149800 | -3.66328600 | 2.62170800  |
| C | 4.76108200  | -5.47776100 | 2.71517600  | C | -2.99256600 | -2.63053400 | 2.63380700  |
| C | 5.87258000  | -4.45671800 | 3.04666300  | O | -2.73607300 | -1.99413500 | 1.44222400  |
| C | 6.25660600  | -3.62085800 | 1.82149700  | H | -4.46048200 | -5.54168200 | 6.19551700  |
| C | 5.49018300  | -3.54809000 | 4.22505800  | H | -3.29153400 | -4.54936400 | 7.05935700  |
| C | 6.09249000  | -2.45085300 | -4.10274500 | H | -2.15684200 | -2.64968600 | 5.91669100  |
| C | 4.98036500  | -2.14215400 | -3.10629800 | H | -4.98310100 | -5.10159100 | 3.81257400  |
| S | 4.85093800  | -3.36987700 | -1.72902000 | H | -1.56242500 | -1.50956600 | 3.78841100  |
| C | -0.03560300 | -6.14131900 | -2.77183000 | H | -4.41269500 | -3.93857400 | 1.68788600  |
| C | 0.91114500  | -5.03087600 | -3.21087000 | H | -2.20734200 | -1.18990500 | 1.59649900  |
| O | 1.77501900  | -4.57243800 | -2.44568100 | H | -4.91453500 | -2.61531800 | 7.04240400  |
| C | -0.37947700 | -6.04766400 | -1.28305200 | H | -6.08835900 | -3.61037600 | 6.17260100  |
| C | -1.42331200 | -4.96708000 | -1.00300500 | H | -5.63059500 | -4.03092900 | 7.83137400  |
| O | -2.39093500 | -4.81795800 | -1.75396500 | C | -2.18481900 | -2.01690600 | -5.25382900 |
| N | -1.23413500 | -4.24010000 | 0.11929700  | C | -3.51006800 | -1.78537400 | -4.55795300 |
| N | 0.80201800  | -4.61394800 | -4.48760500 | O | -4.54535300 | -1.57536700 | -5.18788700 |
| C | 1.63455900  | -3.54210600 | -5.01587800 | N | -3.43866700 | -1.77939200 | -3.19616300 |
| H | 4.95828600  | -5.91325000 | 1.72756600  | C | -4.56280600 | -1.38913900 | -2.37040500 |
| H | 3.79566000  | -4.95862300 | 2.63785300  | C | -4.31233700 | 0.01180400  | -1.79358400 |
| H | 6.76261000  | -5.03135900 | 3.34252600  | O | -3.28593300 | 0.22892300  | -1.10744400 |
| H | 6.59441500  | -4.25070300 | 0.99279900  | C | -4.79208500 | -2.36142500 | -1.18496300 |
| H | 7.07573200  | -2.92910200 | 2.06192200  | O | -5.00040000 | -3.68741200 | -1.58704300 |
| H | 5.40393000  | -3.03796700 | 1.45427800  | N | -5.21905700 | 0.98744000  | -1.97578500 |
| H | 6.31521600  | -2.87702100 | 4.49249500  | C | -6.45608300 | 0.93896100  | -2.80274200 |
| H | 4.61887300  | -2.92966200 | 3.97203300  | C | -6.14198100 | 1.03936900  | -4.29716800 |
| H | 5.23634600  | -4.12008400 | 5.12203900  | C | -7.24060200 | 2.14739500  | -2.25735800 |



|   |             |            |             |   |             |             |             |
|---|-------------|------------|-------------|---|-------------|-------------|-------------|
| C | -6.14497200 | 3.17660900 | -1.93395600 | H | -7.07873900 | 1.05431800  | -4.86543200 |
| C | -4.99903100 | 2.31872900 | -1.37847400 | H | -5.43418300 | -1.41509900 | -3.02248800 |
| H | -4.00243100 | 2.68841300 | -1.63339400 | H | -4.12468900 | -4.09057600 | -1.73864200 |
| H | -5.04308900 | 2.23700400 | -0.28596500 | H | -5.69421600 | -2.02680900 | -0.65379500 |
| H | -5.82800000 | 3.69290200 | -2.84541000 | H | -3.95587400 | -2.26010100 | -0.48548500 |
| H | -6.47321300 | 3.93781000 | -1.22096800 | H | -2.53357900 | -1.96148600 | -2.76984700 |
| H | -7.97828600 | 2.51211500 | -2.97600400 | H | -1.65311500 | -1.06261800 | -5.33630000 |
| H | -7.77362400 | 1.86538200 | -1.34204900 | H | -1.54268200 | -2.70438600 | -4.70121500 |
| H | -6.99270900 | 0.00845100 | -2.59796400 | H | -2.38134500 | -2.39058300 | -6.25990500 |
| H | -5.59922800 | 1.96397700 | -4.52183200 | F | 0.63406800  | -2.08180400 | 1.78378300  |
| H | -5.55414000 | 0.19068000 | -4.65079900 |   |             |             |             |

### SkDHPase.5FUH2-TS1-II- L

|    |             |             |             |   |             |             |             |
|----|-------------|-------------|-------------|---|-------------|-------------|-------------|
| C  | -5.69499600 | -6.35911900 | -1.98267600 | H | -4.67101800 | -3.52720500 | -1.79469000 |
| C  | -4.74994900 | -5.62206700 | -1.10247200 | H | -4.06338700 | -7.14750300 | 0.23833700  |
| N  | -4.02309200 | -6.18478700 | -0.06267500 | H | -2.59590700 | -5.38098200 | 1.33621300  |
| C  | -4.36973900 | -4.31193100 | -1.12261000 | H | -7.44080900 | 0.99005900  | -1.49346500 |
| C  | -3.24813400 | -5.21862500 | 0.49252900  | H | -7.11546000 | 2.26269600  | -0.30866000 |
| N  | -3.43127200 | -4.07022100 | -0.13633000 | H | -5.10465300 | -0.65225300 | -1.56437100 |
| C  | -7.30126600 | 1.19049700  | -0.42940500 | H | -6.29494400 | 0.84247300  | 2.17604400  |
| C  | -6.16484100 | 0.37613800  | 0.09513500  | H | -4.26833900 | -0.68253600 | 2.53765800  |
| N  | -5.83511800 | 0.32471100  | 1.44101500  | H | 1.43933000  | -4.36879500 | 4.44242500  |
| C  | -5.22819500 | -0.41432700 | -0.51981000 | H | 4.99123400  | -3.04820200 | 4.67763800  |
| C  | -4.74364700 | -0.45942500 | 1.59571500  | H | 5.24283700  | -1.06119300 | 3.07487600  |
| N  | -4.34774000 | -0.92044600 | 0.42026900  | H | 3.34956600  | -0.93970900 | 1.40920900  |
| C  | -1.60604200 | -4.89061700 | 4.42571500  | H | 0.13188200  | -5.40918000 | -3.62121200 |
| N  | -2.36718200 | -3.96275100 | 3.61505700  | H | 1.69571800  | -6.22580100 | -3.70118300 |
| C  | -1.75705300 | -3.13141900 | 2.71357800  | H | 0.04468900  | -3.47219800 | -1.74378800 |
| O  | -0.52325200 | -3.38409100 | 2.48701200  | H | 2.64777100  | -6.65997700 | -0.93340300 |
| O  | -2.46590100 | -2.23572400 | 2.16173500  | H | 2.79856800  | -5.03861100 | 1.02446300  |
| C  | 2.46692300  | -4.58336100 | 4.13674600  | H | -0.94958300 | -5.48777400 | 3.79096400  |
| C  | 3.10713700  | -3.37453000 | 3.52176700  | H | -1.93531500 | -3.22969000 | -4.82351900 |
| N  | 2.57897500  | -2.65436600 | 2.44766500  | H | -2.82282200 | -4.23400400 | -3.65210000 |
| C  | 4.29397200  | -2.79840700 | 3.89387500  | H | -8.24115500 | 0.94995900  | 0.07963700  |
| C  | 3.44580400  | -1.68219900 | 2.18708600  | H | 2.42397400  | -5.42576100 | 3.43595200  |
| N  | 4.49244700  | -1.73511800 | 3.03717400  | H | 3.03427100  | -4.90575800 | 5.01258900  |
| C  | 0.82680500  | -6.03672300 | -3.06029400 | H | -2.29718800 | -5.55956600 | 4.94472900  |
| C  | 1.19585400  | -5.34026000 | -1.79953300 | H | -0.98442200 | -4.38717400 | 5.17739900  |
| N  | 2.10580400  | -5.81104500 | -0.86363400 | H | -6.12549800 | -5.66789600 | -2.70948300 |
| C  | 0.73575200  | -4.16219600 | -1.28345400 | H | -3.63797600 | -2.86374800 | -4.40986400 |
| C  | 2.16084000  | -4.92679900 | 0.16208800  | H | 0.33907800  | -7.00065700 | -2.87231500 |
| N  | 1.33513600  | -3.91703700 | -0.06407300 | H | -3.28262600 | -3.67206800 | 3.92272600  |
| C  | -2.67699800 | -3.21332500 | -4.02369300 | C | -4.31215300 | 6.73881600  | 4.02873400  |
| C  | -2.19788500 | -2.33926900 | -2.86086000 | C | -4.46023000 | 5.65590800  | 2.95216400  |
| O  | -3.08805100 | -1.94889800 | -2.02015700 | C | -5.60123400 | 4.67166600  | 3.28749000  |
| O  | -0.97244500 | -2.10453000 | -2.75617100 | C | -5.97153600 | 3.80647600  | 2.07804500  |
| Zn | -2.72310500 | -2.12367800 | 0.05051600  | C | -5.27345800 | 3.79446600  | 4.52684300  |
| Zn | 0.72466800  | -2.50861500 | 1.27035000  | C | -5.97488500 | 2.96754700  | -3.96855800 |
| H  | -5.19847900 | -7.16218100 | -2.53973800 | C | -4.87530800 | 2.57923800  | -2.98575100 |
| H  | -6.52185600 | -6.80883400 | -1.42081300 | S | -4.66809600 | 3.77640200  | -1.59010400 |

|   |             |            |             |   |             |             |             |
|---|-------------|------------|-------------|---|-------------|-------------|-------------|
| C | 0.28432700  | 6.37567300 | -2.61885400 | H | 4.92374300  | 2.92835000  | 1.87937200  |
| C | -0.64621200 | 5.24319000 | -3.03150200 | H | 2.07439300  | 0.85460500  | 1.70552900  |
| O | -1.46175100 | 4.75705400 | -2.23198200 | H | 4.97390100  | 2.07531600  | 7.21483800  |
| C | 0.97343400  | 6.12493000 | -1.27533500 | H | 6.27248700  | 2.91023300  | 6.35384200  |
| C | 2.26864800  | 5.32450500 | -1.40806900 | H | 5.80344800  | 3.44453900  | 7.97572000  |
| O | 2.64841500  | 4.86140900 | -2.48903000 | N | 0.65639800  | 0.61923300  | -0.58243600 |
| N | 2.98455800  | 5.18396700 | -0.26926100 | C | 0.13325500  | 1.69968100  | -1.31192400 |
| N | -0.60009900 | 4.86617100 | -4.32476000 | O | 0.80151300  | 2.21086400  | -2.21370400 |
| C | -1.45793700 | 3.81419100 | -4.85068400 | N | -1.08076300 | 2.14820400  | -0.93938200 |
| H | -4.66498900 | 6.13167800 | 1.98494000  | C | -1.93642900 | 1.47021200  | 0.01888300  |
| H | -3.51947500 | 5.10061800 | 2.83468700  | C | -1.11261800 | 0.78708500  | 1.09376300  |
| H | -6.48260500 | 5.28303800 | 3.52540100  | C | 0.11044300  | 0.06904300  | 0.53954300  |
| H | -6.24569500 | 4.41644900 | 1.21176800  | O | 0.90401800  | -0.51874700 | 1.36453500  |
| H | -6.82975700 | 3.16194900 | 2.31354800  | H | -2.56913100 | 0.72935100  | -0.47902500 |
| H | -5.13152200 | 3.17037900 | 1.77510300  | H | -2.59491600 | 2.20640100  | 0.48496300  |
| H | -5.30863600 | 2.72587200 | 4.28284000  | H | -1.70022700 | 0.08778600  | 1.68809900  |
| H | -4.27008200 | 3.99456400 | 4.91564300  | H | 1.60781200  | 0.31147300  | -0.83566100 |
| H | -5.97612000 | 3.95817600 | 5.34901200  | H | -1.39344100 | 2.99452200  | -1.41505100 |
| H | -4.09489600 | 6.30812600 | 5.01170100  | O | -0.80649100 | -1.57820600 | -0.08433300 |
| H | -5.09450600 | 1.61622500 | -2.51989300 | H | -0.67992100 | -1.59698100 | -1.06769800 |
| H | -3.90817300 | 2.47412500 | -3.48191600 | C | 2.27049400  | 2.09626500  | -5.12000100 |
| H | -3.59141900 | 4.43339600 | -2.07258300 | C | 3.56864500  | 1.71474100  | -4.44510200 |
| H | -6.93873600 | 3.07380100 | -3.46218500 | O | 4.61967100  | 1.54844000  | -5.06157000 |
| H | 0.28493000  | 5.59345200 | -0.60821400 | N | 3.44503700  | 1.55147600  | -3.09765800 |
| H | 1.21004400  | 7.07860100 | -0.79006100 | C | 4.54751000  | 1.15419700  | -2.24946700 |
| H | 2.65103400  | 5.52208600 | 0.61875500  | C | 4.28541100  | -0.25430400 | -1.69637600 |
| H | 3.86118300  | 4.67008200 | -0.32110800 | O | 3.26662300  | -0.47292000 | -1.00717500 |
| H | 1.03199200  | 6.57486000 | -3.39052800 | C | 4.69450200  | 2.14692900  | -1.07945400 |
| H | -2.50915100 | 4.07240400 | -4.69821900 | O | 4.97238200  | 3.46134900  | -1.52773300 |
| H | -1.24789300 | 2.85917500 | -4.35885700 | N | 5.17051900  | -1.24107000 | -1.93431300 |
| H | 0.16609700  | 5.19765600 | -4.89105500 | C | 6.38482400  | -1.19656700 | -2.79359800 |
| H | -0.35282300 | 7.26352900 | -2.53080000 | C | 6.03124500  | -1.23121800 | -4.28350300 |
| H | -1.27350100 | 3.71333100 | -5.92102000 | C | 7.14902000  | -2.44564900 | -2.31363900 |
| H | -5.75419700 | 3.92111600 | -4.45691800 | C | 6.03431000  | -3.45526800 | -1.99504900 |
| H | -6.08013800 | 2.20180600 | -4.74659100 | C | 4.92674500  | -2.58660300 | -1.38098100 |
| H | -5.23389900 | 7.32382200 | 4.12025600  | H | 3.91473400  | -2.91869200 | -1.62727900 |
| H | -3.50094500 | 7.43415000 | 3.79003100  | H | 4.99482600  | -2.54601000 | -0.28698900 |
| C | 5.42045800  | 3.05694500 | 7.02536700  | H | 5.67976000  | -3.93123900 | -2.91466800 |
| C | 4.39063700  | 4.01216300 | 6.40117400  | H | 6.36016800  | -4.24897700 | -1.31731200 |
| C | 3.87962500  | 3.45251000 | 5.09581200  | H | 7.85642700  | -2.80479800 | -3.06487300 |
| C | 2.68399700  | 2.72918800 | 5.02766200  | H | 7.71425200  | -2.21097900 | -1.40438700 |
| C | 4.66536400  | 3.53481300 | 3.93808600  | H | 6.95525100  | -0.29061600 | -2.57026600 |
| C | 2.29508600  | 2.07218300 | 3.86069100  | H | 5.43868100  | -2.12009100 | -4.52551100 |
| C | 4.30173200  | 2.87874200 | 2.76748000  | H | 5.48043000  | -0.34199400 | -4.59500100 |
| C | 3.12461400  | 2.12119700 | 2.73575400  | H | 6.95286900  | -1.27086900 | -4.87476800 |
| O | 2.84327500  | 1.44566800 | 1.58716200  | H | 5.44330400  | 1.19485500  | -2.86799900 |
| H | 4.85346000  | 4.99373800 | 6.24173700  | H | 4.24911100  | 3.74960200  | -2.12453700 |
| H | 3.55926400  | 4.16664900 | 7.09847000  | H | 5.53933100  | 1.84244600  | -0.44992900 |
| H | 2.04745600  | 2.66724200 | 5.90728200  | H | 3.79148400  | 2.10399100  | -0.46001200 |
| H | 5.59097200  | 4.10566500 | 3.96074800  | H | 2.53427000  | 1.74137200  | -2.67496700 |
| H | 1.35407000  | 1.53225900 | 3.80806100  | H | 1.57451300  | 1.25117600  | -5.09785700 |

|   |            |            |             |   |             |            |            |
|---|------------|------------|-------------|---|-------------|------------|------------|
| H | 1.79477500 | 2.92884900 | -4.59588000 | F | -0.58734800 | 1.76465200 | 1.95528200 |
| H | 2.47829900 | 2.36353800 | -6.15657300 |   |             |            |            |

**SkDHPase.5FUH2-INT1-II- L**

|    |             |             |             |   |             |             |             |
|----|-------------|-------------|-------------|---|-------------|-------------|-------------|
| C  | 4.79878700  | 7.01404200  | -2.04117100 | H | -2.02646600 | 4.27412300  | 4.14120300  |
| C  | 3.89965700  | 6.18317500  | -1.19733200 | H | -5.25745000 | 2.26978500  | 4.88720200  |
| N  | 2.94596600  | 6.67133200  | -0.31409300 | H | -5.20013800 | 0.17628600  | 3.40354200  |
| C  | 3.77799000  | 4.82699700  | -1.12355000 | H | -3.43612200 | 0.33107700  | 1.59895500  |
| C  | 2.29695900  | 5.61812800  | 0.24479400  | H | -0.81483400 | 5.26236800  | -3.69500500 |
| N  | 2.77697800  | 4.48348600  | -0.23428200 | H | -2.47603100 | 5.84336200  | -3.83599400 |
| C  | 7.39225900  | -0.22413500 | -0.34650100 | H | -0.53717800 | 3.37951300  | -1.72400100 |
| C  | 6.16915000  | 0.45068000  | 0.16845600  | H | -3.56535300 | 6.22575300  | -1.14145200 |
| N  | 5.81622800  | 0.46556200  | 1.50899500  | H | -3.58387200 | 4.67297700  | 0.87424300  |
| C  | 5.16112300  | 1.12764400  | -0.46482500 | H | 0.19560600  | 5.65630200  | 3.70417200  |
| C  | 4.64165300  | 1.12145000  | 1.64458900  | H | 1.50209700  | 3.37023000  | -4.83848900 |
| N  | 4.21771700  | 1.53365600  | 0.46086600  | H | 2.28605300  | 4.49378800  | -3.69809800 |
| C  | 0.87670200  | 5.10706300  | 4.35602700  | H | 8.29640700  | 0.12582400  | 0.16381500  |
| N  | 1.71188600  | 4.22670600  | 3.56451900  | H | -3.39371300 | 5.04261900  | 3.33493400  |
| C  | 1.21900100  | 3.42096800  | 2.57869300  | H | -3.56485300 | 4.48891400  | 5.00297000  |
| O  | -0.00010800 | 3.62094900  | 2.24194100  | H | 1.51209900  | 5.82264700  | 4.88340000  |
| O  | 2.02277600  | 2.58831800  | 2.04991900  | H | 0.27720800  | 4.56652700  | 5.09995100  |
| C  | -3.11421300 | 4.24793400  | 4.03752400  | H | 5.43561400  | 6.36112500  | -2.64069400 |
| C  | -3.56886600 | 2.90146800  | 3.56741600  | H | 3.24401300  | 3.22125800  | -4.45466400 |
| N  | -2.98995400 | 2.23733200  | 2.48895200  | H | -1.26853600 | 6.82440700  | -2.99330600 |
| C  | -4.58014100 | 2.12073400  | 4.06166000  | H | 2.64033900  | 4.00234200  | 3.88709200  |
| C  | -3.64757200 | 1.09097600  | 2.33925800  | C | 5.13134600  | -6.05496600 | 4.17932600  |
| N  | -4.61516800 | 0.98865500  | 3.27030000  | C | 5.14348200  | -4.97900300 | 3.08594900  |
| C  | -1.60790100 | 5.79677600  | -3.16884800 | C | 6.14195200  | -3.84121400 | 3.39361800  |
| C  | -1.91553800 | 5.08534600  | -1.89714700 | C | 6.40875600  | -2.97764100 | 2.15668500  |
| N  | -2.91702600 | 5.46230900  | -1.01417700 | C | 5.68613600  | -2.96703000 | 4.57210100  |
| C  | -1.32745800 | 3.99368300  | -1.31841700 | C | 6.35589900  | -2.21923200 | -3.86620900 |
| C  | -2.90062200 | 4.61405200  | 0.04151800  | C | 5.21336800  | -2.12123100 | -2.85987900 |
| N  | -1.94164000 | 3.71507600  | -0.11217900 | S | 5.27616000  | -3.44913700 | -1.56911900 |
| C  | 2.25497600  | 3.45785800  | -4.05428300 | C | 0.56476700  | -6.40977600 | -2.52085700 |
| C  | 1.91721000  | 2.55323200  | -2.87476700 | C | 1.36174000  | -5.18274100 | -2.94088200 |
| O  | 2.84912400  | 2.32020700  | -2.02684400 | O | 2.12341000  | -4.60791600 | -2.14651200 |
| O  | 0.73737400  | 2.13370000  | -2.76092300 | C | -0.13959900 | -6.23400500 | -1.17351100 |
| Zn | 2.46274000  | 2.45549800  | 0.03512100  | C | -1.53351400 | -5.62090900 | -1.30434300 |
| Zn | -1.29791800 | 2.44375900  | 1.33034200  | O | -2.00474300 | -5.28402900 | -2.39506100 |
| H  | 4.23905300  | 7.65782900  | -2.72949700 | N | -2.23250600 | -5.51998200 | -0.14994900 |
| H  | 5.45267300  | 7.65920200  | -1.44309500 | N | 1.26694000  | -4.81668200 | -4.23463200 |
| H  | 4.30621500  | 4.07273000  | -1.68010900 | C | 2.00424700  | -3.68199000 | -4.77241500 |
| H  | 2.76225700  | 7.64399800  | -0.11560400 | H | 5.41625200  | -5.44186100 | 2.12948000  |
| H  | 1.50148200  | 5.71118400  | 0.96784200  | H | 4.13730400  | -4.55874300 | 2.95115000  |
| H  | 7.50941000  | -0.01384400 | -1.41131100 | H | 7.09434800  | -4.31409200 | 3.67584700  |
| H  | 7.33176800  | -1.31028900 | -0.22166600 | H | 6.77325600  | -3.57543700 | 1.31619100  |
| H  | 5.02670700  | 1.33737400  | -1.51401600 | H | 7.16928500  | -2.21431600 | 2.37405200  |
| H  | 6.31548600  | -0.00479700 | 2.25060700  | H | 5.49432800  | -2.47521600 | 1.81964600  |
| H  | 4.12433200  | 1.28086300  | 2.57741300  | H | 6.42779800  | -2.19163000 | 4.79912300  |

|   |             |             |             |   |             |             |             |
|---|-------------|-------------|-------------|---|-------------|-------------|-------------|
| H | 4.73577400  | -2.46823400 | 4.34127300  | C | 1.24443300  | -0.56756100 | 0.99156400  |
| H | 5.53879700  | -3.54859800 | 5.48622800  | C | 0.10718700  | 0.21615700  | 0.30499000  |
| H | 4.80381700  | -5.65725400 | 5.14491500  | O | -0.83416300 | 0.60682400  | 1.19095600  |
| H | 5.23820400  | -1.16243000 | -2.33596100 | H | 2.79756200  | -0.52195000 | -0.48864500 |
| H | 4.24149300  | -2.18733000 | -3.35207200 | H | 2.80569800  | -1.96200600 | 0.53006600  |
| H | 4.12543200  | -4.07338400 | -1.90462300 | H | 1.79468200  | 0.11535800  | 1.64148600  |
| H | 7.32967400  | -2.17237200 | -3.36871900 | H | -1.47582500 | -0.44607400 | -0.89853200 |
| H | 0.47561300  | -5.60559400 | -0.51953400 | H | 1.71538300  | -2.87976300 | -1.35842300 |
| H | -0.24377900 | -7.20366300 | -0.67349100 | O | 0.73016400  | 1.41381500  | -0.30502300 |
| H | -1.80967100 | -5.70147100 | 0.74586100  | H | 0.61118200  | 1.45608100  | -1.31495300 |
| H | -3.16038500 | -5.10553700 | -0.19838300 | C | -1.91877400 | -2.48790500 | -5.10264900 |
| H | -0.16318900 | -6.69070500 | -3.28578800 | C | -3.25308500 | -2.26136400 | -4.42117700 |
| H | 3.07861500  | -3.83277700 | -4.63858000 | O | -4.31655300 | -2.26060400 | -5.04169800 |
| H | 1.70751600  | -2.75336400 | -4.27475400 | N | -3.15226700 | -2.01973400 | -3.08513700 |
| H | 0.52896300  | -5.22331200 | -4.78948500 | C | -4.30490900 | -1.77275000 | -2.24420600 |
| H | 1.29757900  | -7.22108300 | -2.43807300 | C | -4.28079100 | -0.32825100 | -1.71985700 |
| H | 1.79155000  | -3.59973400 | -5.83910400 | O | -3.33116400 | 0.06505500  | -1.01552600 |
| H | 6.31618400  | -3.16167400 | -4.41929300 | C | -4.29287500 | -2.73522600 | -1.03990300 |
| H | 6.30371700  | -1.39408500 | -4.58681300 | O | -4.41504100 | -4.09018100 | -1.43195100 |
| H | 6.13059000  | -6.48253000 | 4.31669900  | N | -5.31738500 | 0.49491600  | -1.98829400 |
| H | 4.45438500  | -6.87570500 | 3.92113800  | C | -6.48504800 | 0.24357600  | -2.87361100 |
| C | -5.04072400 | -3.67519800 | 7.02990600  | C | -6.10288600 | 0.31372200  | -4.35483300 |
| C | -3.72490600 | -4.25035500 | 6.48087600  | C | -7.45454300 | 1.35778600  | -2.43286800 |
| C | -3.30471200 | -3.59211800 | 5.18512300  | C | -6.52765100 | 2.53726100  | -2.09753800 |
| C | -2.21321500 | -2.71941300 | 5.11503500  | C | -5.31212400 | 1.86369100  | -1.44360100 |
| C | -4.04056500 | -3.80883500 | 4.01057700  | H | -4.36080000 | 2.35509400  | -1.66504600 |
| C | -1.86661000 | -2.06832500 | 3.92894900  | H | -5.40409200 | 1.82064000  | -0.35057500 |
| C | -3.71927000 | -3.16392600 | 2.82169000  | H | -6.22869700 | 3.05601200  | -3.01395400 |
| C | -2.63044500 | -2.28010300 | 2.77533300  | H | -6.99693900 | 3.27393200  | -1.43952400 |
| O | -2.38859000 | -1.65726100 | 1.59242000  | H | -8.18854500 | 1.59092300  | -3.20801400 |
| H | -3.84381800 | -5.33090800 | 6.32885900  | H | -8.00084800 | 1.04367300  | -1.53607900 |
| H | -2.93282100 | -4.13055000 | 7.22878100  | H | -6.90861300 | -0.73942600 | -2.64919000 |
| H | -1.61535800 | -2.54327900 | 6.00644300  | H | -5.64815200 | 1.28049300  | -4.59743900 |
| H | -4.88474400 | -4.49460000 | 4.02719400  | H | -5.41459700 | -0.48523800 | -4.63690500 |
| H | -0.99860300 | -1.41787600 | 3.88113000  | H | -7.00323500 | 0.20218600  | -4.96950300 |
| H | -4.29584200 | -3.33561100 | 1.91830800  | H | -5.18524800 | -1.97495300 | -2.85359000 |
| H | -1.65673700 | -1.00372800 | 1.64433200  | H | -3.66955700 | -4.32062700 | -2.02757200 |
| H | -4.94477200 | -2.60272300 | 7.23035300  | H | -5.15447600 | -2.51643600 | -0.39694300 |
| H | -5.85896900 | -3.80763100 | 6.31481400  | H | -3.38595500 | -2.55343800 | -0.45086000 |
| H | -5.33017000 | -4.16905400 | 7.96344400  | H | -2.22756700 | -2.09825700 | -2.64659100 |
| N | -0.47152600 | -0.57828300 | -0.74757500 | H | -1.51431800 | -1.52294800 | -5.42885800 |
| C | 0.08768900  | -1.70477700 | -1.30755500 | H | -1.19509900 | -2.95450800 | -4.43226700 |
| O | -0.55169400 | -2.42169500 | -2.09546500 | H | -2.08221200 | -3.10336400 | -5.98915400 |
| N | 1.37053200  | -2.00156900 | -0.97626300 | F | 0.64403800  | -1.53957300 | 1.80041000  |
| C | 2.15326200  | -1.26526100 | -0.00404900 |   |             |             |             |

**SkDHPase.5FUH2-TS2-II- L**

|   |            |            |             |   |            |            |             |
|---|------------|------------|-------------|---|------------|------------|-------------|
| C | 3.37271700 | 7.78301900 | -1.94590300 | C | 2.83375800 | 5.42364200 | -1.00270300 |
| C | 2.62939500 | 6.76690000 | -1.14436700 | C | 1.06788100 | 5.86832800 | 0.17298300  |
| N | 1.49741300 | 7.02953600 | -0.38215800 | N | 1.85666100 | 4.87169200 | -0.19266800 |

|    |             |             |             |   |             |             |             |
|----|-------------|-------------|-------------|---|-------------|-------------|-------------|
| C  | 7.23112300  | 1.12032800  | -0.29949900 | H | 8.06857800  | 1.63916800  | 0.18043500  |
| C  | 5.92160300  | 1.57868000  | 0.22679700  | H | -4.15301900 | 4.30942300  | 3.27196100  |
| N  | 5.59849200  | 1.57819500  | 1.57406600  | H | -4.62565600 | 3.72577600  | 4.87360000  |
| C  | 4.79906700  | 2.04048500  | -0.40417300 | H | 0.27295900  | 5.96876400  | 4.92371100  |
| C  | 4.32843500  | 2.01744300  | 1.71728100  | H | -0.72527900 | 4.51852300  | 5.13522600  |
| N  | 3.81636600  | 2.30440400  | 0.53060300  | H | 4.21659900  | 7.30361700  | -2.44524600 |
| C  | -0.17806900 | 5.12242100  | 4.39890700  | H | 2.55452300  | 3.89128700  | -4.39837300 |
| N  | 0.85148000  | 4.37488600  | 3.71946800  | H | -2.72299800 | 6.51357900  | -2.96721000 |
| C  | 0.59564100  | 3.56310300  | 2.65979600  | H | 1.76720100  | 4.28968800  | 4.13189100  |
| O  | -0.58897400 | 3.60499200  | 2.17128300  | C | 6.04136100  | -5.07469100 | 4.15018100  |
| O  | 1.56866800  | 2.87818800  | 2.20883600  | C | 5.86435100  | -4.00245300 | 3.06738400  |
| C  | -3.94327200 | 3.55396800  | 4.03815000  | C | 6.75921300  | -2.76372700 | 3.27534800  |
| C  | -4.10565300 | 2.16460700  | 3.50852000  | C | 6.64073500  | -1.79829500 | 2.09025800  |
| N  | -3.34959300 | 1.65301200  | 2.45651500  | C | 6.46126000  | -2.03237400 | 4.59318700  |
| C  | -4.97504200 | 1.19356200  | 3.92993100  | C | 6.59911700  | -0.99106600 | -3.84708800 |
| C  | -3.76702800 | 0.40655100  | 2.25194200  | C | 5.68269900  | -1.52855700 | -2.75135100 |
| N  | -4.74734400 | 0.09649200  | 3.12181400  | S | 6.42263900  | -3.01358200 | -1.92982900 |
| C  | -2.69708600 | 5.43117500  | -3.13979000 | C | 1.94111300  | -6.02316600 | -2.30456700 |
| C  | -2.85698800 | 4.65720500  | -1.87770100 | C | 2.42289300  | -4.69052900 | -2.85869700 |
| N  | -3.98988900 | 4.68496900  | -1.07764400 | O | 3.09452300  | -3.90960700 | -2.16207900 |
| C  | -2.00249100 | 3.79958900  | -1.24177300 | C | 1.17148100  | -5.88129000 | -0.98759900 |
| C  | -3.78757400 | 3.86516100  | -0.01714300 | C | -0.32120100 | -5.62186000 | -1.19414100 |
| N  | -2.58609800 | 3.31740800  | -0.08873800 | O | -0.80900600 | -5.43857300 | -2.31361000 |
| C  | 1.53322800  | 3.84534600  | -4.01497500 | N | -1.07412200 | -5.65036100 | -0.06981600 |
| C  | 1.44061800  | 2.87349500  | -2.85832800 | N | 2.15714500  | -4.44087100 | -4.15499400 |
| O  | 2.37076100  | 2.80995800  | -2.01920700 | C | 2.59315800  | -3.21222700 | -4.80442200 |
| O  | 0.33900300  | 2.21192400  | -2.75960100 | H | 6.09328200  | -4.43687000 | 2.08627300  |
| Zn | 1.89984600  | 2.83848900  | 0.18897700  | H | 4.81221100  | -3.68564700 | 3.02581000  |
| Zn | -1.67872300 | 2.17853000  | 1.32983600  | H | 7.80064500  | -3.11638100 | 3.31465400  |
| H  | 2.74086400  | 8.23732000  | -2.71750800 | H | 6.85408900  | -2.29023600 | 1.13569100  |
| H  | 3.76975100  | 8.59170800  | -1.32205300 | H | 7.34532800  | -0.96297800 | 2.20121000  |
| H  | 3.59183200  | 4.80983600  | -1.45736500 | H | 5.62553600  | -1.38430100 | 2.02695400  |
| H  | 1.06604800  | 7.93318700  | -0.25296400 | H | 7.10467000  | -1.15178400 | 4.70784400  |
| H  | 0.20192000  | 5.77834300  | 0.81152900  | H | 5.41761900  | -1.69268500 | 4.62335500  |
| H  | 7.28838000  | 1.32051700  | -1.37132800 | H | 6.62669000  | -2.66831600 | 5.46691300  |
| H  | 7.37410100  | 0.04447800  | -0.15307400 | H | 5.71646400  | -4.72308000 | 5.13400700  |
| H  | 4.61460000  | 2.18158700  | -1.45694800 | H | 5.49329700  | -0.76173400 | -1.99420300 |
| H  | 6.19086200  | 1.23949900  | 2.31875100  | H | 4.71779500  | -1.83688800 | -3.15569000 |
| H  | 3.80427700  | 2.11243900  | 2.65456200  | H | 5.25026100  | -3.64546300 | -1.70538000 |
| H  | -2.92136200 | 3.72655400  | 4.38849500  | H | 7.58380800  | -0.72013700 | -3.45127100 |
| H  | -5.71279400 | 1.18984900  | 4.71622100  | H | 1.60168100  | -5.06297600 | -0.39829100 |
| H  | -5.17117200 | -0.81609700 | 3.20743000  | H | 1.28063900  | -6.79179900 | -0.38773000 |
| H  | -3.37939500 | -0.27703200 | 1.50948700  | H | -0.65964500 | -5.68703900 | 0.84746000  |
| H  | -1.73679500 | 5.18321900  | -3.59561600 | H | -2.06710300 | -5.45056900 | -0.16611000 |
| H  | -3.47925500 | 5.19321800  | -3.86934600 | H | 1.33169000  | -6.56034800 | -3.03487600 |
| H  | -1.03503900 | 3.46624900  | -1.57406300 | H | 3.68021600  | -3.12274200 | -4.74328100 |
| H  | -4.83414500 | 5.20782100  | -1.26025300 | H | 2.13208100  | -2.33704600 | -4.33606200 |
| H  | -4.51623400 | 3.68589500  | 0.75794100  | H | 1.45968000  | -5.01119200 | -4.60979100 |
| H  | -0.89462600 | 5.50118900  | 3.66999200  | H | 2.84867400  | -6.61081400 | -2.12527200 |
| H  | 0.84006600  | 3.57951500  | -4.81398000 | H | 2.30253600  | -3.25057500 | -5.85532200 |
| H  | 1.27784700  | 4.84170200  | -3.63670700 | H | 6.75341300  | -1.73586900 | -4.63243100 |

|   |             |             |             |   |             |             |             |
|---|-------------|-------------|-------------|---|-------------|-------------|-------------|
| H | 6.16275500  | -0.09470300 | -4.30284500 | H | 0.33231900  | 1.75215500  | -1.54905700 |
| H | 7.09061400  | -5.37955700 | 4.23446000  | C | -1.47954800 | -2.74947200 | -5.15642100 |
| H | 5.45648400  | -5.96993700 | 3.91613000  | C | -2.82001800 | -2.77522200 | -4.45324200 |
| C | -4.41267100 | -4.62025000 | 6.93705500  | O | -3.87374100 | -2.99638900 | -5.05118700 |
| C | -2.96646100 | -4.84147100 | 6.46314200  | N | -2.74657400 | -2.49393100 | -3.12344300 |
| C | -2.65329300 | -4.11372900 | 5.17306800  | C | -3.91404500 | -2.48472100 | -2.26719400 |
| C | -1.76432500 | -3.03386000 | 5.12505600  | C | -4.18670700 | -1.06082700 | -1.75802700 |
| C | -3.27991300 | -4.49116800 | 3.97583500  | O | -3.34311400 | -0.48008200 | -1.04885500 |
| C | -1.51032400 | -2.33999200 | 3.93942700  | C | -3.68126000 | -3.40843700 | -1.05536400 |
| C | -3.05001500 | -3.80804100 | 2.78694600  | O | -3.48669600 | -4.75936300 | -1.43616300 |
| C | -2.16440600 | -2.71903200 | 2.76092700  | N | -5.36249200 | -0.46029100 | -2.04898200 |
| O | -2.00505000 | -2.07755400 | 1.57574500  | C | -6.45487900 | -0.94182300 | -2.93496300 |
| H | -2.79634000 | -5.91816900 | 6.33239000  | C | -6.10915900 | -0.76572900 | -4.41708600 |
| H | -2.27192700 | -4.51509500 | 7.24562300  | C | -7.63654900 | -0.06924900 | -2.46958100 |
| H | -1.25237300 | -2.72653700 | 6.03424200  | C | -6.98230400 | 1.28037300  | -2.13273000 |
| H | -3.96382800 | -5.33696300 | 3.97305300  | C | -5.63547500 | 0.88234200  | -1.50861300 |
| H | -0.79510600 | -1.52338200 | 3.91172000  | H | -4.81648900 | 1.56391800  | -1.75571500 |
| H | -3.54318700 | -4.10641300 | 1.86722200  | H | -5.68714900 | 0.82799900  | -0.41366400 |
| H | -1.42317100 | -1.28478800 | 1.63587100  | H | -6.82309400 | 1.86194900  | -3.04638000 |
| H | -4.60578600 | -3.55797600 | 7.12088800  | H | -7.58841700 | 1.88938700  | -1.45612600 |
| H | -5.13262200 | -4.96368400 | 6.18733200  | H | -8.41567000 | 0.00629300  | -3.23198300 |
| H | -4.61196300 | -5.16591500 | 7.86521700  | H | -8.08755300 | -0.50221900 | -1.56940500 |
| N | -0.36279800 | -0.56411800 | -0.76873900 | H | -6.65510900 | -1.99649300 | -2.72810000 |
| C | 0.40044500  | -1.51629000 | -1.39305400 | H | -5.86652400 | 0.27828700  | -4.64364200 |
| O | -0.08562600 | -2.30321900 | -2.22546200 | H | -5.27189200 | -1.40140400 | -4.71214300 |
| N | 1.72357700  | -1.56807500 | -1.08114800 | H | -6.97093500 | -1.05232700 | -5.03010200 |
| C | 2.34944600  | -0.77755500 | -0.04140300 | H | -4.73857800 | -2.87387600 | -2.86414500 |
| C | 1.32256700  | -0.31515700 | 0.97590900  | H | -2.70006700 | -4.81848500 | -2.01830500 |
| C | 0.06902500  | 0.29658100  | 0.31475900  | H | -4.57112400 | -3.39023100 | -0.41407700 |
| O | -0.93483900 | 0.43583000  | 1.22558700  | H | -2.84171600 | -3.01977500 | -0.46768000 |
| H | 2.86300500  | 0.09534900  | -0.45975800 | H | -1.81760900 | -2.36228600 | -2.70495400 |
| H | 3.10105000  | -1.38829600 | 0.46963800  | H | -1.30004100 | -1.74166000 | -5.54806200 |
| H | 1.73911900  | 0.41225300  | 1.67558500  | H | -0.66058200 | -3.00768700 | -4.48360500 |
| H | -1.37224100 | -0.61680700 | -0.91861200 | H | -1.51949000 | -3.43580500 | -6.00446000 |
| H | 2.23126300  | -2.34815300 | -1.49450800 | F | 0.90984800  | -1.42968100 | 1.71698800  |
| O | 0.41737300  | 1.59497400  | -0.21903900 |   |             |             |             |

**SkDHPase.5FUH2-INT2-II- L**

|   |            |            |             |   |             |            |             |
|---|------------|------------|-------------|---|-------------|------------|-------------|
| C | 3.81838500 | 7.68538800 | -1.55671100 | C | 0.15265600  | 4.86435200 | 4.65196400  |
| C | 3.02287900 | 6.66311400 | -0.81670300 | N | 1.13400100  | 4.07131300 | 3.95629200  |
| N | 1.89747700 | 6.93715200 | -0.04908800 | C | 0.85084800  | 3.37878100 | 2.82426200  |
| C | 3.16494200 | 5.30623100 | -0.74553100 | O | -0.30561300 | 3.56294100 | 2.30005900  |
| C | 1.40954900 | 5.77013900 | 0.44043000  | O | 1.77922300  | 2.65215200 | 2.34488600  |
| N | 2.15560700 | 4.75866800 | 0.02681100  | C | -3.70027700 | 3.54273500 | 4.23341800  |
| C | 7.28715600 | 0.72264800 | -0.34134300 | C | -3.91559600 | 2.18811600 | 3.63441500  |
| C | 6.02055700 | 1.23302300 | 0.23655900  | N | -3.17529900 | 1.69813000 | 2.56067900  |
| N | 5.70699300 | 1.16094600 | 1.58434000  | C | -4.82423900 | 1.23206900 | 4.00414900  |
| C | 4.92999200 | 1.81340500 | -0.34892000 | C | -3.63912600 | 0.47909500 | 2.29423500  |
| C | 4.47097900 | 1.67618400 | 1.77012200  | N | -4.63595100 | 0.16795500 | 3.14369800  |
| N | 3.97242900 | 2.07831100 | 0.61120900  | C | -2.38587000 | 5.76724100 | -2.83224600 |

|    |             |             |             |   |             |             |             |
|----|-------------|-------------|-------------|---|-------------|-------------|-------------|
| C  | -2.59031700 | 4.92621400  | -1.62057600 | C | 1.55286000  | -4.34202300 | -3.13217200 |
| N  | -3.78976000 | 4.82251500  | -0.93132000 | O | 2.54260600  | -4.01975500 | -2.45417300 |
| C  | -1.73229900 | 4.09975700  | -0.95005100 | C | 0.43726700  | -5.16665200 | -1.02119100 |
| C  | -3.62170000 | 3.95663700  | 0.09798800  | C | -0.58462100 | -6.11530200 | -0.41686800 |
| N  | -2.37982000 | 3.50373600  | 0.11116400  | O | -1.80014100 | -5.98871300 | -0.57621900 |
| C  | 1.73883900  | 3.99183800  | -3.83777000 | N | -0.08208300 | -7.13900300 | 0.31949600  |
| C  | 1.64379800  | 2.98790600  | -2.71239900 | N | 1.44060900  | -3.98786500 | -4.43092900 |
| O  | 2.61357200  | 2.77737100  | -1.96026300 | C | 2.37718800  | -3.05617700 | -5.05184700 |
| O  | 0.47450000  | 2.44756400  | -2.54439900 | H | 5.71090700  | -4.91472500 | 1.71510100  |
| Zn | 2.07508300  | 2.72178600  | 0.32996600  | H | 4.64401300  | -4.04267500 | 2.80446000  |
| Zn | -1.51622400 | 2.24104100  | 1.44213500  | H | 7.69628500  | -3.90025400 | 2.83496500  |
| H  | 3.21425300  | 8.21082200  | -2.30499100 | H | 6.72145400  | -2.88975300 | 0.75722100  |
| H  | 4.24755900  | 8.43899000  | -0.88687400 | H | 7.44527100  | -1.66159100 | 1.81039900  |
| H  | 3.90038600  | 4.68347500  | -1.22485400 | H | 5.67907700  | -1.86397500 | 1.75067400  |
| H  | 1.50737900  | 7.85187700  | 0.12582200  | H | 7.39660500  | -1.91042100 | 4.32383100  |
| H  | 0.53532300  | 5.68377300  | 1.06852500  | H | 5.64560800  | -2.19630700 | 4.35496000  |
| H  | 7.33588800  | 0.97561600  | -1.40237600 | H | 6.75368600  | -3.36425700 | 5.08393700  |
| H  | 7.36534500  | -0.36587300 | -0.25403800 | H | 5.59702700  | -5.30360500 | 4.77218800  |
| H  | 4.75051600  | 2.03536000  | -1.38820300 | H | 5.44745800  | -1.07489900 | -2.11199600 |
| H  | 6.28226800  | 0.74059800  | 2.30029400  | H | 4.50107100  | -1.72939400 | -3.44707400 |
| H  | 3.95946400  | 1.74001300  | 2.71695400  | H | 4.68301300  | -3.87159500 | -2.37373200 |
| H  | -2.67726700 | 3.65365700  | 4.60515900  | H | 7.52510100  | -1.13424200 | -3.58500600 |
| H  | -5.56537000 | 1.21824200  | 4.78715100  | H | 0.17514800  | -4.15842000 | -0.68876600 |
| H  | -5.09547100 | -0.73031700 | 3.18434300  | H | 1.44634600  | -5.38133900 | -0.66056500 |
| H  | -3.28066800 | -0.17787700 | 1.51372300  | H | 0.90190100  | -7.23459300 | 0.50791700  |
| H  | -1.36680000 | 5.63134000  | -3.19884100 | H | -0.73059100 | -7.77230000 | 0.76351100  |
| H  | -3.06731400 | 5.48670100  | -3.64313700 | H | -0.54042400 | -4.86088600 | -2.93052700 |
| H  | -0.71496300 | 3.85690800  | -1.19836200 | H | 3.40010000  | -3.39710100 | -4.88324600 |
| H  | -4.65247400 | 5.29194300  | -1.16563100 | H | 2.26316400  | -2.04635000 | -4.64110800 |
| H  | -4.40108000 | 3.67946400  | 0.79047800  | H | 0.54233900  | -4.11489100 | -4.87370100 |
| H  | -0.51562900 | 5.33082600  | 3.92855100  | H | 0.57602400  | -6.22955600 | -2.91578800 |
| H  | 0.95730000  | 3.83291700  | -4.58161700 | H | 2.18548500  | -3.02875700 | -6.12573200 |
| H  | 1.62488400  | 4.99289200  | -3.40657600 | H | 6.53338900  | -1.72346900 | -4.92163500 |
| H  | 8.16617100  | 1.16083900  | 0.14501200  | H | 6.25643400  | -0.09971300 | -4.26133800 |
| H  | -3.86721100 | 4.34108300  | 3.50116200  | H | 6.75164200  | -6.10964100 | 3.70213600  |
| H  | -4.38621500 | 3.70332400  | 5.06816500  | H | 5.02145900  | -6.42851800 | 3.54395600  |
| H  | 0.65506700  | 5.64770800  | 5.22595200  | C | -4.63370500 | -4.74792800 | 6.64908500  |
| H  | -0.45548800 | 4.27147800  | 5.34838200  | C | -3.12655200 | -4.80059800 | 6.34157500  |
| H  | 4.64316200  | 7.19574900  | -2.07759800 | C | -2.74756600 | -4.08288000 | 5.06246400  |
| H  | 2.72419000  | 3.94559900  | -4.30534400 | C | -2.13800400 | -2.82366100 | 5.07699700  |
| H  | -2.53459700 | 6.83391300  | -2.62730500 | C | -3.01481900 | -4.65745500 | 3.80930200  |
| H  | 2.02713600  | 3.88194900  | 4.38326000  | C | -1.81842600 | -2.14795800 | 3.89605700  |
| C  | 5.75974600  | -5.64579300 | 3.74563500  | C | -2.70514100 | -4.00345500 | 2.62169000  |
| C  | 5.64009700  | -4.50261800 | 2.72967500  | C | -2.10910900 | -2.73358500 | 2.65712200  |
| C  | 6.71383100  | -3.40799100 | 2.88776000  | O | -1.86711700 | -2.12085900 | 1.46826500  |
| C  | 6.63725000  | -2.40059200 | 1.73344700  | H | -2.81522900 | -5.85112300 | 6.27888500  |
| C  | 6.62306100  | -2.68299700 | 4.23884300  | H | -2.57097600 | -4.36710900 | 7.18154400  |
| C  | 6.51219600  | -1.13364400 | -4.00145600 | H | -1.90069000 | -2.35789600 | 6.03116800  |
| C  | 5.50013400  | -1.69915500 | -3.00913700 | H | -3.46987700 | -5.64449000 | 3.76222800  |
| S  | 5.95029100  | -3.42593500 | -2.51672200 | H | -1.32814300 | -1.17859700 | 3.92833900  |
| C  | 0.42943700  | -5.20167100 | -2.55712500 | H | -2.89110000 | -4.47007400 | 1.65935700  |

|   |             |             |             |   |             |             |             |
|---|-------------|-------------|-------------|---|-------------|-------------|-------------|
| H | -1.34798000 | -1.29270600 | 1.56809100  | O | -3.65025300 | -4.43334300 | -1.98677700 |
| H | -4.97388000 | -3.71304000 | 6.76361300  | N | -5.45328700 | -0.08920600 | -2.03547900 |
| H | -5.21679700 | -5.20077600 | 5.84058700  | C | -6.53648800 | -0.45227400 | -2.98830200 |
| H | -4.86707300 | -5.28532600 | 7.57417500  | C | -6.16377900 | -0.13287900 | -4.44200000 |
| N | -0.38820700 | -0.41406200 | -0.87028900 | C | -7.71042300 | 0.39036500  | -2.45390300 |
| C | 0.30471700  | -1.37264300 | -1.54935300 | C | -7.03866200 | 1.68495800  | -1.96782400 |
| O | -0.25375200 | -2.14664700 | -2.35517500 | C | -5.70786800 | 1.19875100  | -1.37115600 |
| N | 1.64959300  | -1.45777600 | -1.34174800 | H | -4.87362600 | 1.88543800  | -1.54303600 |
| C | 2.34419400  | -0.77618100 | -0.26523800 | H | -5.77348900 | 1.04035000  | -0.28701800 |
| C | 1.36913000  | -0.36345300 | 0.82016400  | H | -6.85618100 | 2.35627800  | -2.81347400 |
| C | 0.13890800  | 0.37187000  | 0.24431100  | H | -7.64476400 | 2.23077200  | -1.23915200 |
| O | -0.83134900 | 0.49648200  | 1.19576300  | H | -8.47468700 | 0.56068500  | -3.21613100 |
| H | 2.87363500  | 0.10491600  | -0.63873500 | H | -8.18487200 | -0.12496800 | -1.61109200 |
| H | 3.08805100  | -1.45523100 | 0.16395500  | H | -6.75999300 | -1.51804200 | -2.89673300 |
| H | 1.83652100  | 0.27436400  | 1.57297800  | H | -5.88766200 | 0.92119600  | -4.55580000 |
| H | -1.40680200 | -0.45760700 | -0.93593700 | H | -5.34362000 | -0.76328600 | -4.79068300 |
| H | 2.07307200  | -2.29455100 | -1.73505000 | H | -7.02560700 | -0.32832000 | -5.08964700 |
| O | 0.55034400  | 1.64933900  | -0.24905500 | H | -4.89681100 | -2.43379800 | -3.04077400 |
| H | 0.45502400  | 1.92554200  | -1.57278000 | H | -2.98347700 | -4.95089300 | -1.49923900 |
| C | -1.66313000 | -2.33621200 | -5.33901100 | H | -4.70483900 | -3.20801900 | -0.66882900 |
| C | -3.00181200 | -2.28152800 | -4.62608400 | H | -2.96168700 | -2.91193300 | -0.72727500 |
| O | -4.05945900 | -2.44093100 | -5.23631900 | H | -1.98306900 | -2.01203100 | -2.86900800 |
| N | -2.91294000 | -2.02161900 | -3.29745000 | H | -1.67009000 | -1.61149200 | -6.15855800 |
| C | -4.05948000 | -2.12117000 | -2.41723700 | H | -0.81958600 | -2.13796900 | -4.67659600 |
| C | -4.30868000 | -0.75777700 | -1.76100900 | H | -1.56543100 | -3.32593900 | -5.79960700 |
| O | -3.47062600 | -0.27498600 | -0.97502900 | F | 0.92459300  | -1.52304000 | 1.46244700  |
| C | -3.82553900 | -3.19721100 | -1.33912000 |   |             |             |             |

### **SkDHPase.5FUH2-TS3-II- L**

|   |             |            |             |    |             |            |             |
|---|-------------|------------|-------------|----|-------------|------------|-------------|
| C | 3.25419700  | 7.72956800 | -2.09721300 | C  | -3.62708800 | 0.36969200 | 2.33490000  |
| C | 2.55483800  | 6.70882200 | -1.26532700 | N  | -4.57607600 | 0.03236200 | 3.22997900  |
| N | 1.50492400  | 6.98895300 | -0.40082900 | C  | -2.80961700 | 5.30587000 | -3.17187700 |
| C | 2.73594400  | 5.35755300 | -1.16049100 | C  | -2.89433100 | 4.57127300 | -1.88027000 |
| C | 1.09868900  | 5.83339800 | 0.17956300  | N  | -3.96464300 | 4.68021100 | -1.00432200 |
| N | 1.82628800  | 4.82331200 | -0.26662400 | C  | -2.03161700 | 3.69942200 | -1.27190800 |
| C | 7.18915700  | 1.13062600 | -0.37690600 | C  | -3.72047500 | 3.89393800 | 0.07250600  |
| C | 5.89520800  | 1.60796600 | 0.16673300  | N  | -2.55252800 | 3.29268100 | -0.06113300 |
| N | 5.59479700  | 1.61855000 | 1.51873500  | Zn | 1.86298800  | 2.85273500 | 0.26358000  |
| C | 4.76554400  | 2.07089500 | -0.44922800 | Zn | -1.57386700 | 2.11715600 | 1.28810300  |
| C | 4.32940900  | 2.06254600 | 1.67964900  | H  | 2.57214900  | 8.22561200 | -2.79697300 |
| N | 3.79765100  | 2.34250500 | 0.49868700  | H  | 3.72484000  | 8.50596900 | -1.48373600 |
| C | -0.19538600 | 5.15736400 | 4.33921200  | H  | 3.43967800  | 4.72866600 | -1.67939600 |
| N | 0.90089500  | 4.50353000 | 3.67619200  | H  | 1.11291600  | 7.90216800 | -0.22191300 |
| C | 0.65465600  | 3.54103700 | 2.74507700  | H  | 0.29688900  | 5.76038500 | 0.89854600  |
| O | -0.56253900 | 3.42516900 | 2.38171200  | H  | 7.23076900  | 1.31826500 | -1.45177300 |
| O | 1.66047600  | 2.89966500 | 2.29848800  | H  | 7.32356500  | 0.05505300 | -0.22068200 |
| C | -3.95126400 | 3.55138200 | 4.05433600  | H  | 4.56546100  | 2.19640900 | -1.50079100 |
| C | -4.02541300 | 2.13917300 | 3.55370700  | H  | 6.19787800  | 1.28359300 | 2.25649300  |
| N | -3.26186600 | 1.63726600 | 2.49849900  | H  | 3.81959400  | 2.16692600 | 2.62373600  |
| C | -4.83878000 | 1.13707400 | 4.01515100  | H  | -2.92039200 | 3.83124300 | 4.28716800  |



|   |             |             |             |   |             |             |             |
|---|-------------|-------------|-------------|---|-------------|-------------|-------------|
| H | -5.56170800 | 1.11913400  | 4.81507200  | H | -2.07880600 | -5.35915700 | 0.00578000  |
| H | -4.94413000 | -0.90025500 | 3.35172000  | H | 1.22888900  | -6.63551600 | -2.92757100 |
| H | -3.22122200 | -0.31103200 | 1.60023100  | H | 3.61083900  | -3.18729800 | -4.62791400 |
| H | -1.89424100 | 5.02177300  | -3.69456100 | H | 2.00834100  | -2.45937500 | -4.32358200 |
| H | -3.65139200 | 5.07270500  | -3.83368800 | H | 1.47100100  | -5.16518200 | -4.56334500 |
| H | -1.09662900 | 3.30242800  | -1.63165100 | H | 2.76459200  | -6.69451200 | -2.05032600 |
| H | -4.79721200 | 5.23222800  | -1.15087200 | H | 2.30115800  | -3.40180800 | -5.80640900 |
| H | -4.39864500 | 3.77512800  | 0.90278800  | H | 6.63462200  | -1.80413200 | -4.66278900 |
| H | -0.88961800 | 5.57326000  | 3.60674900  | H | 6.13893500  | -0.13275600 | -4.32881800 |
| H | 8.04101500  | 1.64483700  | 0.08239100  | H | 7.15509500  | -5.30576500 | 4.25900000  |
| H | -4.32266000 | 4.27025700  | 3.31388700  | H | 5.50557300  | -5.88402500 | 4.00399300  |
| H | -4.55525700 | 3.66437500  | 4.95741900  | C | -4.31532900 | -4.57146700 | 7.10860300  |
| H | 0.19236700  | 5.97480700  | 4.95296300  | C | -2.83867400 | -4.55782000 | 6.67601200  |
| H | -0.76101600 | 4.47996500  | 4.99154300  | C | -2.58098400 | -3.90020700 | 5.33276100  |
| H | 4.03985900  | 7.24768400  | -2.68198300 | C | -1.67744900 | -2.83950100 | 5.19104900  |
| H | -2.79329900 | 6.39268200  | -3.02763200 | C | -3.22413300 | -4.35474800 | 4.17075100  |
| H | 1.82231200  | 4.51237600  | 4.08453600  | C | -1.41444200 | -2.24824000 | 3.95185800  |
| C | 6.10707400  | -4.99075100 | 4.20038000  | C | -2.98584400 | -3.77363200 | 2.92943800  |
| C | 5.90760300  | -3.94018300 | 3.10034100  | C | -2.07245900 | -2.71270800 | 2.80578300  |
| C | 6.81809900  | -2.70497300 | 3.25313600  | O | -1.89470300 | -2.19236100 | 1.56727600  |
| C | 6.67219300  | -1.76651600 | 2.04928700  | H | -2.47264400 | -5.59345700 | 6.64985900  |
| C | 6.56404400  | -1.94013500 | 4.56106800  | H | -2.24270600 | -4.04952400 | 7.44294000  |
| C | 6.53149500  | -1.05113100 | -3.87692400 | H | -1.15517600 | -2.46731300 | 6.06961000  |
| C | 5.60234400  | -1.53707000 | -2.76795400 | H | -3.92363300 | -5.18485300 | 4.23331000  |
| S | 6.27597000  | -3.05649300 | -1.95258700 | H | -0.68952100 | -1.44460300 | 3.86003400  |
| C | 1.85622400  | -6.10170800 | -2.20983200 | H | -3.49120500 | -4.13585200 | 2.03930000  |
| C | 2.32648800  | -4.76818500 | -2.77165300 | H | -1.32692900 | -1.38306400 | 1.53332300  |
| O | 2.94697400  | -3.95762300 | -2.06116100 | H | -4.71319100 | -3.55385300 | 7.18298500  |
| C | 1.11919900  | -5.95414400 | -0.87619000 | H | -4.93917200 | -5.12069800 | 6.39652200  |
| C | -0.35917500 | -5.60564900 | -1.05055400 | H | -4.42928900 | -5.05169100 | 8.08560100  |
| O | -0.84961500 | -5.36686900 | -2.15931600 | C | -1.55518700 | -2.89022800 | -5.06274300 |
| N | -1.09649300 | -5.61532500 | 0.08277600  | C | -2.89563800 | -2.89603900 | -4.36159600 |
| N | 2.11212800  | -4.55186800 | -4.08298300 | O | -3.94989000 | -3.16895000 | -4.93543800 |
| C | 2.53309000  | -3.32271100 | -4.74324200 | N | -2.81156700 | -2.55874900 | -3.04517300 |
| H | 6.10260700  | -4.39793500 | 2.12248000  | C | -3.96662400 | -2.47707700 | -2.17957500 |
| H | 4.85746100  | -3.61477500 | 3.08337400  | C | -4.19002700 | -1.01755100 | -1.75455400 |
| H | 7.85756200  | -3.06511200 | 3.27086000  | O | -3.28683700 | -0.39737900 | -1.16704800 |
| H | 6.85383500  | -2.28281100 | 1.10099600  | C | -3.73985800 | -3.33385400 | -0.91978800 |
| H | 7.38529700  | -0.93414700 | 2.12014500  | O | -3.52797300 | -4.70139300 | -1.23206100 |
| H | 5.65817500  | -1.34709600 | 2.00578900  | N | -5.38923900 | -0.43730400 | -1.98901500 |
| H | 7.21867800  | -1.06363600 | 4.63723700  | C | -6.51274700 | -0.96672000 | -2.80466500 |
| H | 5.52486600  | -1.58941600 | 4.61214800  | C | -6.19205700 | -0.93157100 | -4.30230900 |
| H | 6.74770900  | -2.55734300 | 5.44454900  | C | -7.66344000 | -0.02664200 | -2.39564500 |
| H | 5.81672500  | -4.61447200 | 5.18590700  | C | -6.96981700 | 1.32759300  | -2.17542900 |
| H | 5.46349500  | -0.75975500 | -2.01071500 | C | -5.62490600 | 0.94445200  | -1.53880100 |
| H | 4.61666700  | -1.79018400 | -3.16117200 | H | -4.79328500 | 1.58742400  | -1.84065700 |
| H | 5.07773900  | -3.63438300 | -1.71655600 | H | -5.66602200 | 0.96741300  | -0.44203300 |
| H | 7.53445500  | -0.83405000 | -3.49421500 | H | -6.80802900 | 1.83034500  | -3.13455000 |
| H | 1.60600800  | -5.17549300 | -0.27735200 | H | -7.55074200 | 2.00446000  | -1.54260400 |
| H | 1.18854300  | -6.88520200 | -0.30259000 | H | -8.45167400 | 0.00914200  | -3.15160300 |
| H | -0.67219500 | -5.69735700 | 0.99253800  | H | -8.11233300 | -0.37441200 | -1.45825000 |

|   |             |             |             |   |             |             |             |
|---|-------------|-------------|-------------|---|-------------|-------------|-------------|
| H | -6.73548400 | -1.99342100 | -2.50024300 | O | -0.07901300 | -2.09680300 | -2.48337500 |
| H | -5.93089900 | 0.08347100  | -4.62089800 | N | 1.75836500  | -1.41162900 | -1.35270700 |
| H | -5.37554400 | -1.60745100 | -4.56310300 | C | 2.36523700  | -0.57379700 | -0.33658500 |
| H | -7.07244700 | -1.24707700 | -4.87355800 | C | 1.35226100  | -0.23754600 | 0.74574400  |
| H | -4.80565600 | -2.88172700 | -2.74405000 | C | 0.09894100  | 0.47814400  | 0.19688500  |
| H | -2.76180900 | -4.76877200 | -1.83945900 | O | -0.96424000 | 0.29515700  | 1.01401700  |
| H | -4.63613400 | -3.29269000 | -0.28836700 | H | 0.78442200  | 3.48285000  | -4.87049300 |
| H | -2.90897500 | -2.91016300 | -0.34626300 | H | 1.11947600  | 4.65895800  | -3.57534900 |
| H | -1.88416400 | -2.33624300 | -2.67349400 | H | 2.75290800  | 0.35046000  | -0.77347400 |
| H | -1.12603300 | -1.88416800 | -5.05784600 | H | 3.20611300  | -1.11843200 | 0.10113000  |
| H | -0.85154400 | -3.54004000 | -4.53664900 | H | 1.78032300  | 0.39669400  | 1.52750800  |
| H | -1.69540000 | -3.22740000 | -6.09033200 | H | 2.46760100  | 3.85130500  | -4.38185600 |
| C | 1.44220100  | 3.71792100  | -4.03305900 | H | -1.22092300 | -0.27112400 | -1.33338800 |
| C | 1.40179500  | 2.63121600  | -2.97050600 | H | 2.19420500  | -2.29921900 | -1.60299800 |
| O | 2.29571100  | 2.52797000  | -2.12443100 | O | 0.29312700  | 1.82802200  | -0.03108500 |
| O | 0.32701800  | 1.87703500  | -3.02078000 | H | 0.24446500  | 1.17793400  | -2.27646000 |
| N | -0.20537500 | -0.14040000 | -1.25754600 | F | 0.96451500  | -1.44036400 | 1.34517300  |
| C | 0.45895000  | -1.28583000 | -1.71693300 |   |             |             |             |

**SkDHPase.5FUH2-EP-II- L**

|    |             |             |             |    |             |             |             |
|----|-------------|-------------|-------------|----|-------------|-------------|-------------|
| C  | -5.43060200 | -6.47405600 | -2.50927500 | Zn | 0.99447200  | -2.74762000 | 1.24698200  |
| C  | -4.58686500 | -5.76082300 | -1.51994900 | H  | -4.89476500 | -7.30129300 | -2.98930600 |
| N  | -4.02431600 | -6.33555500 | -0.39031900 | H  | -6.34003600 | -6.88813500 | -2.05850100 |
| C  | -4.17253600 | -4.46238100 | -1.49473300 | H  | -4.37392100 | -3.66583600 | -2.18950700 |
| C  | -3.30686700 | -5.38914300 | 0.26389300  | H  | -4.13217900 | -7.29501300 | -0.09518200 |
| N  | -3.37069800 | -4.24079700 | -0.39119900 | H  | -2.79363700 | -5.55695200 | 1.19859700  |
| C  | -7.38996100 | 0.81725500  | -0.27612300 | H  | -7.46868700 | 0.73825700  | -1.36217300 |
| C  | -6.20189900 | 0.05853300  | 0.19651500  | H  | -7.32265000 | 1.87979800  | -0.02237700 |
| N  | -5.90194100 | -0.12877800 | 1.53771500  | H  | -5.03945700 | -0.68741900 | -1.54098400 |
| C  | -5.20096700 | -0.58602200 | -0.47936400 | H  | -6.42182600 | 0.25469100  | 2.31414600  |
| C  | -4.76735700 | -0.85934500 | 1.63293600  | H  | -4.30092800 | -1.16795500 | 2.55510300  |
| N  | -4.31863000 | -1.14982900 | 0.42232000  | H  | 1.54168800  | -4.87313000 | 3.84523400  |
| C  | -1.42127200 | -5.41420400 | 4.02872400  | H  | 4.81478400  | -3.10088000 | 4.91296400  |
| N  | -2.21953900 | -4.46312100 | 3.28799200  | H  | 4.90957700  | -0.86833200 | 3.63874900  |
| C  | -1.63395900 | -3.51171400 | 2.48710700  | H  | 3.23912700  | -0.77137400 | 1.75530700  |
| O  | -0.38217300 | -3.67828800 | 2.27427700  | H  | 0.34935700  | -5.12056800 | -4.04240300 |
| O  | -2.38857500 | -2.61228500 | 2.01487200  | H  | 1.95384500  | -5.84881100 | -4.15796400 |
| C  | 2.63314100  | -4.89254400 | 3.79090700  | H  | 0.20027200  | -3.29367200 | -1.90673700 |
| C  | 3.16784500  | -3.52904700 | 3.46579000  | H  | 2.91330300  | -6.48302100 | -1.50865900 |
| N  | 2.67141000  | -2.73729400 | 2.43079500  | H  | 3.05078400  | -5.09282000 | 0.61539100  |
| C  | 4.18460400  | -2.84329600 | 4.07688600  | H  | -0.75509700 | -5.95076300 | 3.35094000  |
| C  | 3.38127200  | -1.61179400 | 2.42373600  | H  | -8.31868500 | 0.42617100  | 0.15434400  |
| N  | 4.30462500  | -1.64298700 | 3.40240600  | H  | 2.91363900  | -5.63378500 | 3.03259500  |
| C  | 1.07004100  | -5.75074500 | -3.51798400 | H  | 3.02765900  | -5.23787300 | 4.74906300  |
| C  | 1.40192400  | -5.13193500 | -2.19989400 | H  | -2.08471700 | -6.13813100 | 4.50871700  |
| N  | 2.34323300  | -5.66850800 | -1.33218600 | H  | -0.80735100 | -4.94253200 | 4.80669300  |
| C  | 0.91167800  | -4.02763300 | -1.55047800 | H  | -5.73683400 | -5.77898000 | -3.29315600 |
| C  | 2.39229800  | -4.90520600 | -0.21822400 | H  | 0.62892900  | -6.74694500 | -3.39872300 |
| N  | 1.52943400  | -3.90463400 | -0.31591500 | H  | -3.13556500 | -4.21978100 | 3.63447400  |
| Zn | -2.73810400 | -2.31170300 | -0.09171400 | C  | -4.66822000 | 6.06382900  | 4.68968800  |

|   |             |            |             |   |             |             |             |
|---|-------------|------------|-------------|---|-------------|-------------|-------------|
| C | -4.76432900 | 5.07907200 | 3.51731200  | C | 2.97936700  | 1.88086800  | 2.82981100  |
| C | -6.14776300 | 4.41835800 | 3.36132900  | O | 2.65413500  | 1.35005500  | 1.61935700  |
| C | -6.21269300 | 3.59209100 | 2.07076100  | H | 4.82641300  | 4.48056200  | 6.44666600  |
| C | -6.52942000 | 3.55404200 | 4.57278800  | H | 3.42862400  | 3.77955700  | 7.24040500  |
| C | -6.14462700 | 2.97284300 | -3.62951900 | H | 1.74807100  | 2.83932900  | 5.84421600  |
| C | -5.00541600 | 3.12726900 | -2.62547500 | H | 5.78685200  | 2.97769400  | 4.39945100  |
| S | -4.98141200 | 4.83773900 | -1.92034600 | H | 0.99980700  | 1.89782000  | 3.67271400  |
| C | 0.23362600  | 6.49442200 | -2.10672000 | H | 5.03921800  | 2.02460500  | 2.23496700  |
| C | -0.74181200 | 5.40044100 | -2.52179300 | H | 1.71490700  | 1.10141400  | 1.56735100  |
| O | -1.52794800 | 4.89018900 | -1.70787300 | H | 4.71301800  | 1.63535000  | 7.61169700  |
| C | 0.94485900  | 6.19795900 | -0.78290000 | H | 6.12028900  | 2.34037900  | 6.80575400  |
| C | 2.32193900  | 5.56329300 | -0.97022500 | H | 5.54839500  | 3.02116100  | 8.33290500  |
| O | 2.77616900  | 5.27857900 | -2.08258400 | C | 2.13833800  | 2.58473600  | -4.82316500 |
| N | 3.03390400  | 5.38297100 | 0.16802300  | C | 3.48544500  | 2.20714900  | -4.23993700 |
| N | -0.74911100 | 5.07900900 | -3.83239100 | O | 4.47993100  | 2.03865300  | -4.94600200 |
| C | -1.67135700 | 4.10634800 | -4.40595900 | N | 3.46775000  | 2.02627400  | -2.89132800 |
| H | -4.52355700 | 5.60597800 | 2.58567300  | C | 4.62323400  | 1.59469500  | -2.13543400 |
| H | -4.00194100 | 4.29416800 | 3.62944600  | C | 4.44893900  | 0.14039100  | -1.65789100 |
| H | -6.89079000 | 5.22511800 | 3.27730300  | O | 3.43141700  | -0.19491900 | -1.02726600 |
| H | -5.98327300 | 4.19414500 | 1.18536800  | C | 4.79304900  | 2.49543600  | -0.89347100 |
| H | -7.21286400 | 3.16214600 | 1.93549600  | O | 5.07564000  | 3.83912800  | -1.23530900 |
| H | -5.48786600 | 2.76717000 | 2.10314400  | N | 5.45330600  | -0.74172900 | -1.86674400 |
| H | -7.51400400 | 3.09289900 | 4.43327400  | C | 6.57017500  | -0.60567500 | -2.83661600 |
| H | -5.79795500 | 2.74817600 | 4.72233900  | C | 6.04983300  | -0.62721300 | -4.27660000 |
| H | -6.57253400 | 4.13360400 | 5.49888000  | C | 7.44956000  | -1.81656300 | -2.47252900 |
| H | -4.80012100 | 5.56775700 | 5.65614900  | C | 6.43480500  | -2.90084700 | -2.07325100 |
| H | -5.10944900 | 2.40527000 | -1.80967000 | C | 5.32598100  | -2.11677700 | -1.35331100 |
| H | -4.04216200 | 2.94563100 | -3.10548400 | H | 4.31995600  | -2.49949600 | -1.54675700 |
| H | -3.64704700 | 4.90322500 | -1.70461700 | H | 5.46478700  | -2.11288400 | -0.26425400 |
| H | -7.11561800 | 3.18617500 | -3.17021500 | H | 6.03435000  | -3.39133800 | -2.96628800 |
| H | 0.32273800  | 5.53046000 | -0.17657700 | H | 6.87115200  | -3.67774200 | -1.43932900 |
| H | 1.07655500  | 7.12010900 | -0.20582700 | H | 8.09707500  | -2.11503100 | -3.30055900 |
| H | 2.61519500  | 5.50551600 | 1.07566300  | H | 8.08953600  | -1.56767100 | -1.61833400 |
| H | 3.93666900  | 4.92158800 | 0.08664300  | H | 7.11197500  | 0.32606300  | -2.65019800 |
| H | 0.97570800  | 6.67738200 | -2.88772700 | H | 5.46901400  | -1.53688800 | -4.46539300 |
| H | -2.69678800 | 4.48929100 | -4.39596900 | H | 5.43417300  | 0.24332400  | -4.50751500 |
| H | -1.63463100 | 3.17013600 | -3.84327300 | H | 6.89532800  | -0.62018500 | -4.97435200 |
| H | -0.03917200 | 5.48258200 | -4.42417900 | H | 5.49283000  | 1.71363100  | -2.78082200 |
| H | -0.37266100 | 7.40136700 | -1.99769700 | H | 4.34620400  | 4.18848300  | -1.79272800 |
| H | -1.37671800 | 3.91343800 | -5.43833500 | H | 5.64500500  | 2.13627700  | -0.30319500 |
| H | -6.02090300 | 3.65649600 | -4.47360200 | H | 3.89076600  | 2.40348100  | -0.27525200 |
| H | -6.17435600 | 1.94869100 | -4.01911100 | H | 2.61110300  | 2.26791900  | -2.37574100 |
| H | -5.43124700 | 6.84624700 | 4.61033300  | H | 1.54907300  | 1.67506000  | -4.98538000 |
| H | -3.69138200 | 6.55742900 | 4.70767100  | H | 1.57787400  | 3.23803000  | -4.15052300 |
| C | 5.22303000  | 2.57788500 | 7.38631600  | H | 2.29751500  | 3.06905300  | -5.78783800 |
| C | 4.29687400  | 3.53438900 | 6.61844500  | C | -2.57378700 | -2.99342500 | -4.19686600 |
| C | 3.82428200  | 2.96888700 | 5.29582700  | C | -2.08441000 | -2.15392300 | -3.01223200 |
| C | 2.48041100  | 2.65619500 | 5.06158000  | O | -2.96171200 | -1.93552600 | -2.08211500 |
| C | 4.73804900  | 2.72703100 | 4.25848600  | O | -0.90303600 | -1.77485700 | -2.99582800 |
| C | 2.04916800  | 2.12009600 | 3.84554600  | N | 0.62629600  | 0.43727800  | -1.65164300 |
| C | 4.33206300  | 2.18629600 | 3.04277600  | C | 0.27085500  | 1.74614600  | -1.54574100 |

|   |             |             |             |   |             |             |             |
|---|-------------|-------------|-------------|---|-------------|-------------|-------------|
| O | 1.07634900  | 2.68981600  | -1.61017100 | H | -2.80527800 | 1.63967600  | -0.29691600 |
| N | -1.06787100 | 1.99479700  | -1.32646900 | H | -2.04032000 | 0.33357100  | 1.47333500  |
| C | -1.89404600 | 1.09313900  | -0.54995000 | H | -3.58957500 | -2.71027900 | -4.48636100 |
| C | -1.24225600 | 0.59678100  | 0.76633000  | H | 1.62535000  | 0.24073600  | -1.66011900 |
| C | -0.39220400 | -0.66068100 | 0.65460500  | H | -1.24983000 | 2.99097500  | -1.22055500 |
| O | 0.68486200  | -0.74775800 | 1.31278400  | O | -0.84498400 | -1.65794900 | 0.01430500  |
| H | -1.90026200 | -2.87966000 | -5.04748700 | H | -0.00636000 | -0.26629400 | -2.03639800 |
| H | -2.59699300 | -4.04890300 | -3.90270700 | F | -0.48854500 | 1.61344800  | 1.34688900  |
| H | -2.19596900 | 0.21633100  | -1.13057600 |   |             |             |             |

### SkDHPase.5FUH2-ES-II-D

|    |             |             |             |   |             |             |             |
|----|-------------|-------------|-------------|---|-------------|-------------|-------------|
| C  | -6.72181000 | -4.79848500 | -3.36269900 | C | -1.35883900 | 1.96003900  | 0.61221700  |
| C  | -5.80964600 | -4.36405800 | -2.27396800 | C | -0.60451000 | 1.06272000  | 1.58717700  |
| N  | -5.44396700 | -5.15022600 | -1.19193700 | C | 0.41139700  | 0.19686600  | 0.85122700  |
| C  | -5.13493700 | -3.19093600 | -2.09564700 | O | 0.76063200  | -0.91272700 | 1.25813100  |
| C  | -4.58147000 | -4.44294300 | -0.41841700 | H | -6.33304600 | -5.66931700 | -3.90393100 |
| N  | -4.36673900 | -3.25061300 | -0.94900000 | H | -7.71949000 | -5.06046800 | -2.99079500 |
| C  | -7.15124600 | 2.37032300  | -0.13578000 | H | -5.12665000 | -2.30630500 | -2.70807600 |
| C  | -6.08433800 | 1.38285500  | 0.20855400  | H | -5.76569400 | -6.08783500 | -1.00234500 |
| N  | -5.68735100 | 1.11773500  | 1.51223100  | H | -4.16383100 | -4.80801600 | 0.50890000  |
| C  | -5.28860800 | 0.57725800  | -0.56411100 | H | -7.36115500 | 2.32715300  | -1.20659000 |
| C  | -4.69597700 | 0.19496500  | 1.48808300  | H | -6.85198000 | 3.39521000  | 0.10874800  |
| N  | -4.43188900 | -0.15001500 | 0.24055800  | H | -5.25636300 | 0.46110800  | -1.63593400 |
| C  | -2.74437500 | -5.51406000 | 3.24119500  | H | -6.04184100 | 1.57633200  | 2.33885300  |
| N  | -3.32666700 | -4.33388000 | 2.64322100  | H | -4.19916800 | -0.20608100 | 2.35725200  |
| C  | -2.54398800 | -3.38423000 | 2.01796900  | H | 0.28254300  | -5.60919200 | 3.25397600  |
| O  | -1.31643800 | -3.71221800 | 1.85403300  | H | 3.85350500  | -4.75266100 | 4.22343900  |
| O  | -3.11864000 | -2.32732400 | 1.64089100  | H | 4.43468800  | -2.43657900 | 3.24579500  |
| C  | 1.33336100  | -5.83975200 | 3.05971600  | H | 2.81732200  | -1.75103300 | 1.45953800  |
| C  | 2.11879600  | -4.58234600 | 2.82695500  | H | -0.80341400 | -4.52604500 | -4.67386600 |
| N  | 1.78631600  | -3.57002000 | 1.91855000  | H | 0.65585900  | -5.47596800 | -4.97313000 |
| C  | 3.28859900  | -4.24426000 | 3.45816400  | H | -0.71511600 | -3.10521300 | -2.39314300 |
| C  | 2.75991600  | -2.67231600 | 2.01334200  | H | 1.54805100  | -6.63426700 | -2.38893700 |
| N  | 3.68496400  | -3.03770800 | 2.92388900  | H | 1.86413700  | -5.52008000 | -0.11805200 |
| C  | -0.19193100 | -5.34490300 | -4.29067800 | H | -2.12376200 | -6.03144000 | 2.50787800  |
| C  | 0.24405100  | -5.00941500 | -2.90562200 | H | -2.41125600 | -1.75398000 | -5.41383100 |
| N  | 1.10282900  | -5.76877400 | -2.12099400 | H | -3.41012800 | -2.88426900 | -4.47709300 |
| C  | -0.09473200 | -3.94412800 | -2.12199000 | H | -2.01143700 | 1.34814000  | -0.02066900 |
| C  | 1.24660500  | -5.15008200 | -0.92138500 | H | -1.98196600 | 2.67408100  | 1.15192100  |
| N  | 0.52817600  | -4.03915900 | -0.89200300 | H | -8.08704600 | 2.15850900  | 0.39364700  |
| C  | -3.14394000 | -1.82906300 | -4.60826100 | H | 1.36218400  | -6.51010400 | 2.19171100  |
| C  | -2.55518200 | -1.31031900 | -3.29200800 | H | 1.74119600  | -6.38404200 | 3.91448200  |
| O  | -3.39370700 | -0.95299000 | -2.38922800 | H | -3.54635300 | -6.18726400 | 3.55647700  |
| O  | -1.31082100 | -1.32673800 | -3.15632400 | H | -2.11890700 | -5.29062000 | 4.11575900  |
| Zn | -3.16592000 | -1.63112700 | -0.38088600 | H | -6.84071300 | -3.98717300 | -4.08350300 |
| Zn | -0.04064900 | -2.81614900 | 0.67840600  | H | -4.05465000 | -1.28841600 | -4.87934100 |
| N  | 0.97777300  | 0.78760500  | -0.23176700 | H | -0.79024100 | -6.26314000 | -4.32602100 |
| C  | 0.72950600  | 2.11030100  | -0.67466900 | H | -4.19949800 | -3.98123900 | 3.00751000  |
| O  | 1.50535400  | 2.64943400  | -1.45970200 | H | 1.81273100  | 0.34641500  | -0.61682100 |
| N  | -0.37433700 | 2.69437300  | -0.16977200 | H | -0.55208200 | 3.64683200  | -0.49468600 |

|   |             |             |             |   |             |             |             |
|---|-------------|-------------|-------------|---|-------------|-------------|-------------|
| O | -1.23015300 | -1.64136500 | -0.41367000 | C | 3.38878100  | 0.25522200  | 5.19752300  |
| H | -1.00830900 | -1.41398400 | -1.34161300 | C | 4.98443800  | 0.16502300  | 2.91887400  |
| C | -3.50756000 | 6.19336100  | 5.49460700  | C | 2.91163400  | 0.77280100  | 4.00170200  |
| C | -3.78018500 | 5.42024200  | 4.19798100  | C | 3.70550400  | 0.73149500  | 2.84769500  |
| C | -5.21635300 | 4.86034500  | 4.11755200  | O | 3.18814700  | 1.25832200  | 1.70511800  |
| C | -5.58431600 | 4.48542400  | 2.67791100  | H | 4.49495100  | -1.54279900 | 7.04765200  |
| C | -5.42593200 | 3.66592400  | 5.06058500  | H | 6.14528100  | -1.30771000 | 6.49315300  |
| C | -5.39470300 | 4.64653400  | -3.16500400 | H | 6.46443700  | -0.74607900 | 4.18645500  |
| C | -4.35339300 | 3.85897700  | -2.37275400 | H | 2.75188600  | 0.28918000  | 6.07769100  |
| S | -3.81193700 | 4.68046700  | -0.80420800 | H | 5.61250500  | 0.14209300  | 2.03310600  |
| C | 1.47896400  | 6.96797200  | -1.50727700 | H | 1.91773600  | 1.20330800  | 3.93883600  |
| C | 0.39967400  | 5.97903600  | -1.92915400 | H | 3.61016500  | 0.85659800  | 0.91187900  |
| O | -0.36970000 | 5.47206800  | -1.09886100 | H | 6.06106100  | 1.09612800  | 7.26872900  |
| C | 2.30728000  | 6.48835700  | -0.31103500 | H | 4.40175300  | 0.85811600  | 7.82517600  |
| C | 3.49991800  | 5.62743900  | -0.71855100 | H | 5.72403900  | -0.02296100 | 8.60065400  |
| O | 3.58426000  | 5.10747900  | -1.83688500 | C | 2.63008100  | 2.66060500  | -4.46348500 |
| N | 4.45729300  | 5.46997800  | 0.22461200  | C | 3.93996900  | 2.06126600  | -4.00167700 |
| N | 0.26794800  | 5.76590300  | -3.25405500 | O | 4.85672600  | 1.77054300  | -4.76647200 |
| C | -0.76488000 | 4.89689500  | -3.79733900 | N | 3.99757300  | 1.85890000  | -2.65089100 |
| H | -3.61164500 | 6.08907800  | 3.34442900  | C | 5.16599700  | 1.30885300  | -1.99595000 |
| H | -3.06147600 | 4.59554200  | 4.08871300  | C | 4.79548500  | -0.06204700 | -1.41884900 |
| H | -5.89960800 | 5.66188300  | 4.43462800  | O | 3.94495700  | -0.12861000 | -0.49169400 |
| H | -5.52373300 | 5.34775300  | 2.00703200  | C | 5.64325400  | 2.26450500  | -0.87983400 |
| H | -6.60856700 | 4.09471000  | 2.62298200  | O | 5.95231300  | 3.54646000  | -1.38672100 |
| H | -4.90032600 | 3.72548700  | 2.28163900  | N | 5.34189900  | -1.18432800 | -1.90511400 |
| H | -6.46219200 | 3.30983200  | 5.02452900  | C | 6.37126200  | -1.33961400 | -2.97527200 |
| H | -4.76976400 | 2.83048000  | 4.78082700  | C | 5.75937500  | -1.35388900 | -4.38285200 |
| H | -5.20702600 | 3.91719500  | 6.10237600  | C | 7.01993600  | -2.67909000 | -2.57690000 |
| H | -3.62430200 | 5.56251100  | 6.38163600  | C | 5.84178600  | -3.51168700 | -2.04569400 |
| H | -4.75074600 | 2.89123400  | -2.06034300 | C | 4.97490800  | -2.48485300 | -1.30101400 |
| H | -3.46419500 | 3.65078300  | -2.97195900 | H | 3.90057400  | -2.66276300 | -1.40207000 |
| H | -2.69187900 | 5.27645300  | -1.26469700 | H | 5.19535400  | -2.45048500 | -0.22873400 |
| H | -6.28469300 | 4.84391500  | -2.56072800 | H | 5.28284600  | -3.95348600 | -2.87634000 |
| H | 1.66296500  | 5.90429100  | 0.35710100  | H | 6.15918200  | -4.32785600 | -1.39195000 |
| H | 2.66750100  | 7.34631300  | 0.26689800  | H | 7.53512100  | -3.14810400 | -3.41839900 |
| H | 4.39508400  | 5.91494800  | 1.12562400  | H | 7.75531400  | -2.51491700 | -1.78123600 |
| H | 5.27083600  | 4.90640600  | -0.01154300 | H | 7.09266900  | -0.52257100 | -2.89929100 |
| H | 2.13400000  | 7.22045700  | -2.34495000 | H | 5.00021100  | -2.13700500 | -4.47732200 |
| H | -1.75928500 | 5.31268800  | -3.60885800 | H | 5.31242000  | -0.38900800 | -4.63066400 |
| H | -0.70454400 | 3.90003300  | -3.35174800 | H | 6.54828800  | -1.55489700 | -5.11499800 |
| H | 0.98235300  | 6.12032600  | -3.87124600 | H | 5.93869800  | 1.23981700  | -2.76154700 |
| H | 0.94193700  | 7.87947400  | -1.21991400 | H | 5.15099400  | 3.90841900  | -1.82318500 |
| H | -0.62133200 | 4.81293500  | -4.87525000 | H | 6.55928500  | 1.87087600  | -0.42441300 |
| H | -5.00035700 | 5.61156300  | -3.49676900 | H | 4.87587400  | 2.31901200  | -0.09494500 |
| H | -5.70203000 | 4.08087700  | -4.05265400 | H | 3.18623400  | 2.12026800  | -2.08987600 |
| H | -4.19615200 | 7.03915100  | 5.59612200  | H | 1.82106500  | 1.93239900  | -4.34579200 |
| H | -2.48855500 | 6.59336700  | 5.51199400  | H | 2.37564400  | 3.53664200  | -3.86175800 |
| C | 5.35262000  | 0.34931700  | 7.64041500  | H | 2.72122300  | 2.92940900  | -5.51626500 |
| C | 5.18533000  | -0.79703500 | 6.63155700  | F | -1.47795800 | 0.26792500  | 2.29655600  |
| C | 4.67027000  | -0.30926100 | 5.29578000  | H | -0.03268200 | 1.67630500  | 2.29825500  |
| C | 5.45531500  | -0.34184900 | 4.13692000  |   |             |             |             |

**SkDHPase.5FUH2-TS1-II- D**

|    |             |             |             |   |             |             |             |
|----|-------------|-------------|-------------|---|-------------|-------------|-------------|
| C  | -6.15308600 | -6.03379300 | -1.74335800 | H | 3.26136000  | -1.22716000 | 1.34017300  |
| C  | -5.09068600 | -5.34602000 | -0.96634900 | H | -0.29554500 | -5.61000400 | -3.42602900 |
| N  | -4.30838100 | -5.94239400 | 0.01209400  | H | 1.22238000  | -6.51117600 | -3.48065900 |
| C  | -4.64032900 | -4.05970300 | -1.03580400 | H | -0.25098400 | -3.58846900 | -1.63439100 |
| C  | -3.43643500 | -5.01634300 | 0.48691900  | H | 2.16376000  | -6.88866300 | -0.70003400 |
| N  | -3.61026900 | -3.86513500 | -0.13697000 | H | 2.42691200  | -5.19713500 | 1.18435500  |
| C  | -7.17692600 | 1.67303500  | -0.49995500 | H | -1.27452600 | -5.27615400 | 4.02555700  |
| C  | -6.09189000 | 0.80799200  | 0.03968700  | H | -2.18594900 | -3.33139600 | -4.71948700 |
| N  | -5.75034200 | 0.77191800  | 1.38372100  | H | -3.13053900 | -4.19433700 | -3.48251200 |
| C  | -5.22563200 | -0.06552000 | -0.56261000 | H | -8.13302200 | 1.48968100  | 0.00343400  |
| C  | -4.71938700 | -0.08820800 | 1.54892100  | H | 1.95575300  | -5.47852300 | 3.61544600  |
| N  | -4.37746500 | -0.61022300 | 0.38356500  | H | 2.74239100  | -4.99644200 | 5.12558800  |
| C  | -1.93480600 | -4.61773700 | 4.59260300  | H | -2.62885600 | -5.23488400 | 5.16925100  |
| N  | -2.68450700 | -3.77604400 | 3.69508200  | H | -1.31640600 | -4.04730300 | 5.29870100  |
| C  | -2.06012800 | -3.02280500 | 2.73973900  | H | -6.60255600 | -5.32873500 | -2.44512600 |
| O  | -0.82193800 | -3.29732900 | 2.54348800  | H | -3.85273500 | -2.81637000 | -4.31689700 |
| O  | -2.76557500 | -2.17914600 | 2.12241900  | H | -0.16738500 | -7.17866000 | -2.61398300 |
| C  | 2.14833000  | -4.63178600 | 4.28477900  | H | -3.60320100 | -3.45674100 | 3.96123700  |
| C  | 2.87168800  | -3.51955300 | 3.58552200  | C | -3.75618800 | 7.15714000  | 3.72103700  |
| N  | 2.36179200  | -2.78350900 | 2.51290400  | C | -3.99066800 | 6.04531700  | 2.69026100  |
| C  | 4.13400400  | -3.06576500 | 3.86833400  | C | -5.29090300 | 5.25367600  | 2.94117400  |
| C  | 3.31277000  | -1.92376100 | 2.16501400  | C | -5.60469800 | 4.31978800  | 1.76762100  |
| N  | 4.39645100  | -2.06238900 | 2.95863700  | C | -5.25499900 | 4.46532800  | 4.25943200  |
| C  | 0.36929800  | -6.25044400 | -2.84365900 | C | -5.73666000 | 3.19809300  | -4.11141300 |
| C  | 0.78472400  | -5.52388700 | -1.61409500 | C | -4.59870900 | 3.02270800  | -3.11112000 |
| N  | 1.67350100  | -6.00681300 | -0.66412800 | S | -4.32061700 | 4.54389000  | -2.08683400 |
| C  | 0.39988900  | -4.29917700 | -1.14694900 | C | 1.45215200  | 5.18890800  | -2.71035500 |
| C  | 1.79044700  | -5.08364200 | 0.32132500  | C | 0.09428000  | 4.68197200  | -3.19492700 |
| N  | 1.02417700  | -4.03670600 | 0.05678200  | O | -0.90532900 | 4.68679400  | -2.45843800 |
| C  | -2.91560300 | -3.21175500 | -3.91703600 | C | 1.51526800  | 5.24177600  | -1.17486500 |
| C  | -2.36095400 | -2.30685100 | -2.81172100 | C | 2.79749100  | 5.89114500  | -0.67729200 |
| O  | -3.21145300 | -1.77952900 | -2.00859800 | O | 3.86443800  | 5.28179200  | -0.57823800 |
| O  | -1.11784300 | -2.18035800 | -2.70954900 | N | 2.71070300  | 7.20785600  | -0.35895600 |
| Zn | -2.84870300 | -1.93025200 | 0.06894600  | N | 0.02899800  | 4.27690600  | -4.48032900 |
| Zn | 0.49687900  | -2.53391600 | 1.33596300  | C | -1.17284400 | 3.66351700  | -5.03482600 |
| H  | -5.76075900 | -6.87669100 | -2.32444300 | H | -4.03637500 | 6.48668700  | 1.68680000  |
| H  | -6.95399700 | -6.41981600 | -1.10187500 | H | -3.13777600 | 5.35155900  | 2.68407200  |
| H  | -4.95656500 | -3.26289800 | -1.68690900 | H | -6.10917600 | 5.98602200  | 3.00971600  |
| H  | -4.37586700 | -6.89950300 | 0.32550400  | H | -5.65470100 | 4.86052900  | 0.81795400  |
| H  | -2.71985400 | -5.21122700 | 1.26920900  | H | -6.56944700 | 3.81777800  | 1.91936100  |
| H  | -7.31879700 | 1.46758900  | -1.56295400 | H | -4.82929000 | 3.55102600  | 1.65969600  |
| H  | -6.93869300 | 2.73633700  | -0.39164500 | H | -6.19150500 | 3.91683800  | 4.41509500  |
| H  | -5.13498300 | -0.34004600 | -1.60157500 | H | -4.43469500 | 3.73565200  | 4.25475800  |
| H  | -6.16293800 | 1.33969600  | 2.10949600  | H | -5.11375100 | 5.11472000  | 5.12763400  |
| H  | -4.24038400 | -0.31053800 | 2.48820800  | H | -3.60994800 | 6.75894200  | 4.72958300  |
| H  | 1.17807000  | -4.29575600 | 4.66127900  | H | -4.80648200 | 2.19736700  | -2.42597600 |
| H  | 4.84393200  | -3.36235800 | 4.62395100  | H | -3.66223400 | 2.78877200  | -3.62060200 |
| H  | 5.22384000  | -1.48575500 | 2.92075900  | H | -3.01754000 | 4.72579500  | -2.39132200 |

|   |             |             |             |   |             |             |             |
|---|-------------|-------------|-------------|---|-------------|-------------|-------------|
| H | -6.67309000 | 3.45865000  | -3.60794400 | H | -2.40242100 | 0.75095200  | -0.52358400 |
| H | 1.49783400  | 4.22482900  | -0.77857400 | H | -2.42424800 | 2.33882400  | 0.26108500  |
| H | 0.63244500  | 5.76593300  | -0.79860900 | H | 1.70109200  | 0.13978900  | -0.88036300 |
| H | 1.83897800  | 7.71136900  | -0.37407400 | H | -1.11782800 | 2.97690700  | -1.59576200 |
| H | 3.54251200  | 7.67896900  | -0.03467100 | O | -0.89122600 | -1.50914800 | -0.06031900 |
| H | 2.25355200  | 4.54869800  | -3.09260300 | H | -0.76268400 | -1.58974200 | -1.04068300 |
| H | -2.03911200 | 4.29009100  | -4.81641500 | C | 2.41379200  | 1.65869400  | -5.23900900 |
| H | -1.33864900 | 2.66354600  | -4.61803900 | C | 3.68577100  | 1.21389900  | -4.54146700 |
| H | 0.89650100  | 4.15313700  | -4.98128000 | O | 4.71514100  | 0.96786100  | -5.16809600 |
| H | 1.60735700  | 6.19048500  | -3.13350000 | N | 3.56122200  | 1.09281300  | -3.19515500 |
| H | -1.05968100 | 3.58269500  | -6.11693100 | C | 4.68174100  | 0.79796300  | -2.32780400 |
| H | -5.51585500 | 3.99504500  | -4.82659300 | C | 4.41035100  | -0.54429700 | -1.63664900 |
| H | -5.90107500 | 2.26849700  | -4.66917300 | O | 3.44486200  | -0.64475700 | -0.84534600 |
| H | -4.60772600 | 7.84584600  | 3.75481100  | C | 4.86805300  | 1.90930300  | -1.27393500 |
| H | -2.86669100 | 7.74539800  | 3.47302200  | O | 5.07347100  | 3.12611200  | -1.94784700 |
| C | 5.68433600  | 2.87491700  | 6.85145600  | N | 5.20406800  | -1.60436100 | -1.88108500 |
| C | 4.38739800  | 3.63620000  | 6.53278200  | C | 6.35984800  | -1.70579500 | -2.81689800 |
| C | 3.79568900  | 3.20356100  | 5.21080800  | C | 5.91621600  | -1.90686400 | -4.27206900 |
| C | 3.03089200  | 2.03446500  | 5.12052700  | C | 7.11617000  | -2.91704600 | -2.23828700 |
| C | 4.06033600  | 3.90600000  | 4.02715900  | C | 5.99349300  | -3.84793900 | -1.75257900 |
| C | 2.55908700  | 1.56779300  | 3.89533900  | C | 4.94218200  | -2.88063100 | -1.18781800 |
| C | 3.59976600  | 3.45779700  | 2.79110900  | H | 3.91020800  | -3.20081200 | -1.35667900 |
| C | 2.85473300  | 2.27755100  | 2.72602700  | H | 5.06060600  | -2.73403700 | -0.10790500 |
| O | 2.42322600  | 1.85364900  | 1.49695400  | H | 5.58013000  | -4.41525900 | -2.59236300 |
| H | 4.59184500  | 4.71293400  | 6.51485300  | H | 6.33239900  | -4.56930300 | -1.00415500 |
| H | 3.66283400  | 3.47071900  | 7.33963600  | H | 7.77205400  | -3.38095800 | -2.97879700 |
| H | 2.79897100  | 1.47616400  | 6.02488900  | H | 7.73603100  | -2.60055600 | -1.39155900 |
| H | 4.64926700  | 4.81911700  | 4.07138700  | H | 6.96753700  | -0.80071100 | -2.74119000 |
| H | 1.95506800  | 0.66540100  | 3.84003200  | H | 5.27080900  | -2.78604600 | -4.36969700 |
| H | 3.81535800  | 3.99999300  | 1.87522700  | H | 5.39134400  | -1.02990600 | -4.65593500 |
| H | 2.07980200  | 0.94488100  | 1.57572600  | H | 6.79985300  | -2.06402800 | -4.90001200 |
| H | 5.50145500  | 1.79648300  | 6.90501100  | H | 5.56405800  | 0.76336500  | -2.96683500 |
| H | 6.43689700  | 3.04532200  | 6.07475200  | H | 4.65639100  | 3.84215800  | -1.43515000 |
| H | 6.10810700  | 3.19323900  | 7.80993500  | H | 5.73310700  | 1.63894900  | -0.64147100 |
| N | 0.75466100  | 0.49312100  | -0.67921400 | H | 3.98906100  | 1.93464000  | -0.61783300 |
| C | 0.31637400  | 1.58606100  | -1.43045000 | H | 2.69458700  | 1.41198700  | -2.76569000 |
| O | 1.04226500  | 2.06845400  | -2.30776300 | H | 2.14518400  | 0.90601600  | -5.98620700 |
| N | -0.89329400 | 2.10007200  | -1.12689400 | H | 1.57781100  | 1.81060400  | -4.55731600 |
| C | -1.77363800 | 1.54541100  | -0.11351100 | H | 2.63289700  | 2.57991900  | -5.79071000 |
| C | -0.90594000 | 1.00044000  | 1.00885800  | F | -1.67354300 | 0.38733900  | 1.97506200  |
| C | 0.17488700  | 0.05759600  | 0.48999900  | H | -0.34926000 | 1.81927000  | 1.48605600  |
| O | 0.91979000  | -0.56303200 | 1.33007200  |   |             |             |             |

**SkDHPase.5FUH2-INT1-II- D**

|   |             |             |             |   |             |             |             |
|---|-------------|-------------|-------------|---|-------------|-------------|-------------|
| C | -5.26965900 | -6.75155100 | -1.77209900 | C | -7.33956400 | 0.72404600  | -0.42297300 |
| C | -4.27347200 | -5.94844600 | -1.01975800 | C | -6.17262900 | -0.02021800 | 0.11519900  |
| N | -3.32917100 | -6.45704900 | -0.13906800 | N | -5.79485800 | 0.01092200  | 1.44924700  |
| C | -4.04597300 | -4.60424000 | -1.03513100 | C | -5.24091300 | -0.81439400 | -0.49441500 |
| C | -2.58427000 | -5.42523500 | 0.33458100  | C | -4.67673900 | -0.73279200 | 1.60233300  |
| N | -2.99311800 | -4.28819500 | -0.19959700 | N | -4.31684800 | -1.24446100 | 0.43788500  |

|    |             |             |             |   |             |             |             |
|----|-------------|-------------|-------------|---|-------------|-------------|-------------|
| C  | -1.21777000 | -4.83285300 | 4.54013100  | H | -3.45381200 | -3.20981900 | -4.35504400 |
| N  | -2.03267100 | -4.04776100 | 3.64786200  | H | 0.85446100  | -7.06081300 | -2.71122400 |
| C  | -1.49682700 | -3.30568800 | 2.63580800  | H | -2.96188300 | -3.77799300 | 3.93145800  |
| O  | -0.26453000 | -3.53245600 | 2.35660500  | C | -4.66605000 | 6.58350700  | 3.83290000  |
| O  | -2.27608500 | -2.51092000 | 2.03941600  | C | -4.75551000 | 5.46137700  | 2.79071900  |
| C  | 2.82404100  | -4.27596200 | 4.19287700  | C | -5.87785600 | 4.44742800  | 3.09937900  |
| C  | 3.39159600  | -3.01982400 | 3.60443400  | C | -6.15897500 | 3.54343800  | 1.89423800  |
| N  | 2.82325400  | -2.35428800 | 2.52012000  | C | -5.57709300 | 3.60322900  | 4.34729000  |
| C  | 4.51694500  | -2.33696800 | 3.98483200  | C | -6.16574500 | 2.47411400  | -4.02883100 |
| C  | 3.59815800  | -1.30558600 | 2.25627900  | C | -5.00897600 | 2.31323700  | -3.04691200 |
| N  | 4.63168600  | -1.26648800 | 3.11942200  | S | -4.85918700 | 3.72838000  | -1.85872700 |
| C  | 1.20682200  | -6.04759800 | -2.93773300 | C | 0.68827000  | 5.41331700  | -2.65573900 |
| C  | 1.56176400  | -5.29033800 | -1.70605600 | C | -0.60019900 | 4.76206500  | -3.15740800 |
| N  | 2.58149900  | -5.64632400 | -0.83550600 | O | -1.61035500 | 4.68001100  | -2.44135100 |
| C  | 1.01191700  | -4.16182200 | -1.16247600 | C | 0.73917600  | 5.42053800  | -1.11839400 |
| C  | 2.61299600  | -4.74944100 | 0.17902900  | C | 1.91039500  | 6.22518300  | -0.57842100 |
| N  | 1.66710500  | -3.83903900 | 0.01008600  | O | 3.04381500  | 5.76020500  | -0.43934800 |
| C  | -2.48003900 | -3.48325500 | -3.94150100 | N | 1.64382600  | 7.51931500  | -0.26385300 |
| C  | -2.07906700 | -2.52948400 | -2.81927800 | N | -0.59983400 | 4.33060700  | -4.43758200 |
| O  | -2.99624400 | -2.15168900 | -2.01124400 | C | -1.72144100 | 3.57937100  | -4.99024400 |
| O  | -0.86561800 | -2.21436700 | -2.70431300 | H | -4.94022500 | 5.90274400  | 1.80331600  |
| Zn | -2.61807600 | -2.25852700 | 0.06083200  | H | -3.79483100 | 4.93257200  | 2.71772000  |
| Zn | 1.08703200  | -2.48079800 | 1.40503200  | H | -6.79254800 | 5.02582700  | 3.29772400  |
| H  | -4.79512400 | -7.48315500 | -2.43657800 | H | -6.41580000 | 4.12453200  | 1.00341100  |
| H  | -5.94849000 | -7.30054500 | -1.10905200 | H | -7.00040700 | 2.86862300  | 2.10344100  |
| H  | -4.53894800 | -3.84322000 | -1.61482400 | H | -5.28050500 | 2.93774200  | 1.64081200  |
| H  | -3.21397400 | -7.42755200 | 0.11378500  | H | -6.40280900 | 2.91585200  | 4.56692900  |
| H  | -1.77747800 | -5.53641600 | 1.04238300  | H | -4.66874700 | 3.00409200  | 4.20209800  |
| H  | -7.48801900 | 0.46814000  | -1.47400200 | H | -5.42619700 | 4.21967400  | 5.23775300  |
| H  | -7.19233800 | 1.80740700  | -0.35817000 | H | -4.41186300 | 6.20295800  | 4.82698400  |
| H  | -5.14777300 | -1.09211000 | -1.53209100 | H | -5.13228400 | 1.41083000  | -2.44328900 |
| H  | -6.23774500 | 0.56072500  | 2.17137500  | H | -4.05497200 | 2.21508800  | -3.56839300 |
| H  | -4.14229200 | -0.86706200 | 2.52825900  | H | -3.70201400 | 4.24185000  | -2.33011900 |
| H  | 1.76943100  | -4.14550700 | 4.44996600  | H | -7.11963400 | 2.58480500  | -3.50416100 |
| H  | 5.22508900  | -2.51627400 | 4.77789700  | H | 0.85965100  | 4.39466300  | -0.76681600 |
| H  | 5.31992200  | -0.52908700 | 3.16374500  | H | -0.21073200 | 5.80295100  | -0.73431800 |
| H  | 3.44653900  | -0.59635900 | 1.45269600  | H | 0.71575100  | 7.90661100  | -0.31177500 |
| H  | 0.40931600  | -5.52047900 | -3.46448800 | H | 2.39687600  | 8.09306000  | 0.08609400  |
| H  | 2.05548700  | -6.13753200 | -3.62521400 | H | 1.56207100  | 4.88729300  | -3.05221300 |
| H  | 0.22598500  | -3.54798600 | -1.57617300 | H | -2.65238900 | 4.11395200  | -4.79433300 |
| H  | 3.20986300  | -6.42907800 | -0.94431200 | H | -1.78548800 | 2.57694700  | -4.55113300 |
| H  | 3.31871800  | -4.78316400 | 0.99429600  | H | 0.29104300  | 4.25635700  | -4.90643100 |
| H  | -0.51206800 | -5.43477400 | 3.96549600  | H | 0.71762400  | 6.43972800  | -3.04584000 |
| H  | -1.72614300 | -3.49381000 | -4.72988700 | H | -1.58690800 | 3.48747200  | -6.06917700 |
| H  | -2.57297300 | -4.49036200 | -3.52010100 | H | -6.03238800 | 3.35899800  | -4.65727200 |
| H  | -8.26462500 | 0.47922400  | 0.11130200  | H | -6.23724300 | 1.59604600  | -4.68207500 |
| H  | 2.88399600  | -5.11644300 | 3.49144200  | H | -5.61918000 | 7.11762000  | 3.91428800  |
| H  | 3.37209500  | -4.55438300 | 5.09564600  | H | -3.89952500 | 7.31657900  | 3.56134000  |
| H  | -1.85923200 | -5.50490800 | 5.11598700  | C | 5.31222500  | 3.62059200  | 6.81874800  |
| H  | -0.64438100 | -4.21927300 | 5.24852200  | C | 3.80431300  | 3.84226600  | 6.60963500  |
| H  | -5.87663100 | -6.08740600 | -2.39012300 | C | 3.30157300  | 3.29540700  | 5.29043200  |



|   |             |             |             |   |             |             |             |
|---|-------------|-------------|-------------|---|-------------|-------------|-------------|
| C | 2.68821900  | 2.04114700  | 5.20481000  | N | 3.30072400  | 1.58138200  | -3.21965300 |
| C | 3.46661200  | 4.01965300  | 4.09905300  | C | 4.45017600  | 1.46722600  | -2.34497800 |
| C | 2.25883200  | 1.51734300  | 3.98299900  | C | 4.42501500  | 0.08833100  | -1.67145200 |
| C | 3.04956500  | 3.51654600  | 2.87118800  | O | 3.51747200  | -0.18985300 | -0.86006300 |
| C | 2.44372700  | 2.25399000  | 2.80617600  | C | 4.42700800  | 2.57316200  | -1.27110500 |
| O | 2.05581600  | 1.80377000  | 1.58055400  | O | 4.43194000  | 3.81791700  | -1.92572300 |
| H | 3.59072000  | 4.91675900  | 6.66761200  | N | 5.38774400  | -0.81560200 | -1.95470900 |
| H | 3.25285400  | 3.37479900  | 7.43409600  | C | 6.51816300  | -0.70315000 | -2.91715900 |
| H | 2.53166700  | 1.46102200  | 6.11182500  | C | 6.08049800  | -0.95987700 | -4.36521300 |
| H | 3.93068500  | 5.00278800  | 4.13435900  | C | 7.49036900  | -1.76779000 | -2.37338400 |
| H | 1.76270600  | 0.55108100  | 3.94066100  | C | 6.56232200  | -2.88465500 | -1.86889300 |
| H | 3.17436100  | 4.08849600  | 1.95634700  | C | 5.37137200  | -2.12043500 | -1.26974000 |
| H | 1.67436200  | 0.89554600  | 1.61618900  | H | 4.40829000  | -2.61729700 | -1.41922700 |
| H | 5.55596100  | 2.55273100  | 6.80771600  | H | 5.48579400  | -1.96271500 | -0.19002300 |
| H | 5.89378100  | 4.10096500  | 6.02513900  | H | 6.23352400  | -3.51094700 | -2.70449000 |
| H | 5.64376000  | 4.03339600  | 7.77731500  | H | 7.04280900  | -3.53954900 | -1.13677400 |
| N | 0.55343900  | 0.51178300  | -0.84434000 | H | 8.19707000  | -2.10490700 | -3.13558500 |
| C | 0.05909800  | 1.63069600  | -1.47089400 | H | 8.06810000  | -1.35348700 | -1.53918800 |
| O | 0.75001400  | 2.28568200  | -2.27399100 | H | 6.96061400  | 0.29329000  | -2.84255600 |
| N | -1.21787800 | 2.00585200  | -1.19420800 | H | 5.59005600  | -1.93438200 | -4.46163100 |
| C | -2.02645100 | 1.40660600  | -0.15067500 | H | 5.40792200  | -0.17802200 | -4.72290300 |
| C | -1.09740100 | 0.80786500  | 0.88911000  | H | 6.96199700  | -0.95833300 | -5.01566100 |
| C | -0.09167800 | -0.17832900 | 0.25693600  | H | 5.33087800  | 1.60255400  | -2.97302200 |
| O | 0.82355900  | -0.60893600 | 1.15774600  | H | 3.95907900  | 4.46378800  | -1.36874500 |
| H | -2.68890900 | 0.63019300  | -0.54955200 | H | 5.31464600  | 2.44217700  | -0.62514000 |
| H | -2.65459200 | 2.17730100  | 0.30291500  | H | 3.54453100  | 2.43449100  | -0.63364500 |
| H | 1.56049600  | 0.34967400  | -0.92763000 | H | 2.39650300  | 1.78396600  | -2.78705300 |
| H | -1.50052400 | 2.89346700  | -1.60158000 | H | 1.95740100  | 1.36284200  | -6.05319100 |
| O | -0.81020700 | -1.33578700 | -0.29213500 | H | 1.25091800  | 2.08255900  | -4.57833200 |
| H | -0.68610400 | -1.45207500 | -1.29641500 | H | 2.19999700  | 3.07269000  | -5.74008600 |
| C | 2.10628500  | 2.09479000  | -5.25390700 | F | -1.85589700 | 0.17300100  | 1.86489200  |
| C | 3.42107300  | 1.79270400  | -4.55488500 | H | -0.50464900 | 1.58841400  | 1.37525900  |
| O | 4.48063300  | 1.72891200  | -5.17794800 |   |             |             |             |

**SkDHPase.5FUH2-TS2-II- D**

|   |            |            |             |   |             |            |             |
|---|------------|------------|-------------|---|-------------|------------|-------------|
| C | 3.69874800 | 7.69386300 | -1.82907100 | O | -0.40984300 | 3.62474700 | 2.23444000  |
| C | 2.89435900 | 6.68153800 | -1.08839700 | O | 1.77865800  | 3.00097300 | 2.15389400  |
| N | 1.79959900 | 6.97185600 | -0.28484500 | C | -3.77872500 | 3.67101200 | 4.09726900  |
| C | 3.00475200 | 5.32077200 | -1.04071700 | C | -4.01614800 | 2.31836400 | 3.50009200  |
| C | 1.30148300 | 5.80859400 | 0.20546700  | N | -3.25189000 | 1.78672000 | 2.46277200  |
| N | 2.00896300 | 4.78594600 | -0.24377800 | C | -4.97971700 | 1.40500300 | 3.83848500  |
| C | 7.27388700 | 0.84467100 | -0.31366800 | C | -3.75739800 | 0.58715800 | 2.18619800  |
| C | 5.98124000 | 1.33592500 | 0.21010100  | N | -4.80229200 | 0.32588200 | 2.99506800  |
| N | 5.63875700 | 1.31309300 | 1.55299700  | C | -2.46773500 | 5.62371500 | -3.04891600 |
| C | 4.89344400 | 1.86387300 | -0.42483200 | C | -2.65004200 | 4.82683400 | -1.80398700 |
| C | 4.38893000 | 1.80833000 | 1.68843100  | N | -3.80094500 | 4.83264000 | -1.02984800 |
| N | 3.91284100 | 2.14884200 | 0.50273600  | C | -1.80649700 | 3.95997900 | -1.16623900 |
| C | 0.05037300 | 5.07150500 | 4.47617000  | C | -3.61994600 | 3.99081900 | 0.01703600  |
| N | 1.08562900 | 4.44603800 | 3.70385900  | N | -2.41445000 | 3.44914500 | -0.03831700 |
| C | 0.80348300 | 3.62948800 | 2.65441400  | C | 1.68972900  | 3.87600400 | -3.96398100 |

|    |             |             |             |   |             |             |             |
|----|-------------|-------------|-------------|---|-------------|-------------|-------------|
| C  | 1.54957600  | 2.86403800  | -2.84461200 | N | 1.49950100  | -4.14497900 | -4.29234600 |
| O  | 2.49364700  | 2.68853200  | -2.03813900 | C | 2.44747900  | -3.20467900 | -4.88363300 |
| O  | 0.40028100  | 2.29048300  | -2.73603200 | H | 5.58736500  | -4.74332800 | 1.97702700  |
| Zn | 2.02744600  | 2.74341700  | 0.17904000  | H | 4.77331200  | -3.70472700 | 3.13655900  |
| Zn | -1.53741100 | 2.26247000  | 1.36772000  | H | 7.79934900  | -3.89900500 | 2.76149700  |
| H  | 3.09309500  | 8.25017100  | -2.55367900 | H | 6.67660800  | -2.89219100 | 0.76608200  |
| H  | 4.16496400  | 8.42320800  | -1.15691700 | H | 7.63126500  | -1.68802400 | 1.64703500  |
| H  | 3.71073500  | 4.68518500  | -1.54695900 | H | 5.86241800  | -1.72142700 | 1.81406000  |
| H  | 1.43611900  | 7.89283500  | -0.08748700 | H | 7.90769900  | -1.81433400 | 4.14555700  |
| H  | 0.44803200  | 5.74047200  | 0.86308200  | H | 6.15889900  | -1.91076800 | 4.42733100  |
| H  | 7.34088000  | 1.05110600  | -1.38392600 | H | 7.23667800  | -3.15236300 | 5.07523700  |
| H  | 7.38945900  | -0.23528700 | -0.17593300 | H | 5.84316100  | -4.96483700 | 5.04124900  |
| H  | 4.73308200  | 2.04037800  | -1.47609200 | H | 5.48070100  | -1.14113700 | -2.00739500 |
| H  | 6.21016800  | 0.94612000  | 2.30030200  | H | 4.51674700  | -1.71764700 | -3.36703100 |
| H  | 3.84973700  | 1.89228500  | 2.61706200  | H | 4.64193400  | -3.89233000 | -2.28381700 |
| H  | -2.77606200 | 3.74390500  | 4.52918000  | H | 7.55708100  | -1.21805800 | -3.47900400 |
| H  | -5.75241900 | 1.43017400  | 4.59009800  | H | -0.02255700 | -4.34743600 | -0.63031500 |
| H  | -5.30764400 | -0.54777100 | 3.02067100  | H | 1.36491700  | -5.43920700 | -0.52214000 |
| H  | -3.40889200 | -0.07952200 | 1.40923100  | H | 0.99133600  | -7.69152400 | -0.01951400 |
| H  | -1.49695400 | 5.38815800  | -3.48873700 | H | -0.59432500 | -8.27662600 | 0.38361400  |
| H  | -3.23345600 | 5.39384300  | -3.79822600 | H | -0.52429200 | -5.07663200 | -2.89576900 |
| H  | -0.83013100 | 3.63887000  | -1.48275600 | H | 3.46675400  | -3.51976300 | -4.65485800 |
| H  | -4.64249600 | 5.35722800  | -1.21981400 | H | 2.28939200  | -2.18943100 | -4.50192800 |
| H  | -4.36442900 | 3.79484200  | 0.77273600  | H | 0.62326200  | -4.29113700 | -4.77175100 |
| H  | -0.70008100 | 5.50126100  | 3.81147900  | H | 0.63208800  | -6.40968400 | -2.80193400 |
| H  | 0.97222100  | 3.68571400  | -4.76333800 | H | 2.31160900  | -3.20365900 | -5.96631600 |
| H  | 1.49903400  | 4.86916600  | -3.54242100 | H | 6.55045600  | -1.73412700 | -4.83547600 |
| H  | 8.12701900  | 1.33420900  | 0.17053300  | H | 6.32289200  | -0.12442000 | -4.12481200 |
| H  | -3.86557900 | 4.46571400  | 3.34760000  | H | 6.75409200  | -5.94745400 | 3.88716400  |
| H  | -4.50691600 | 3.87050200  | 4.88651700  | H | 4.99384400  | -6.07760600 | 3.97052000  |
| H  | 0.48148100  | 5.87526400  | 5.07903900  | C | -4.58925700 | -4.52723200 | 6.84929600  |
| H  | -0.45828700 | 4.37440600  | 5.15672300  | C | -3.06572000 | -4.40092900 | 6.67292500  |
| H  | 4.49717100  | 7.19158200  | -2.37834400 | C | -2.65876400 | -3.78246400 | 5.35117100  |
| H  | 2.70740400  | 3.87444600  | -4.35930400 | C | -2.29338500 | -2.43560100 | 5.25367100  |
| H  | -2.50278200 | 6.70280400  | -2.85841200 | C | -2.65193400 | -4.54154400 | 4.16980200  |
| H  | 2.01735000  | 4.36626100  | 4.08011200  | C | -1.93655200 | -1.85795400 | 4.03227500  |
| C  | 5.83067900  | -5.37410000 | 4.02657400  | C | -2.30395600 | -3.98665800 | 2.94254800  |
| C  | 5.69727400  | -4.27577800 | 2.96376300  | C | -1.94315100 | -2.63356300 | 2.86566200  |
| C  | 6.88873500  | -3.30002500 | 2.91048200  | O | -1.60870700 | -2.13866300 | 1.64169400  |
| C  | 6.75856900  | -2.34912200 | 1.71371700  | H | -2.61466600 | -5.39693300 | 6.76468000  |
| C  | 7.05821600  | -2.50373100 | 4.21332500  | H | -2.65631400 | -3.80309600 | 7.49592900  |
| C  | 6.54597900  | -1.17322200 | -3.89711300 | H | -2.27392500 | -1.82229100 | 6.15215400  |
| C  | 5.51441500  | -1.73688200 | -2.92440300 | H | -2.92095300 | -5.59467800 | 4.21258800  |
| S  | 5.91551300  | -3.49161500 | -2.49299500 | H | -1.63119900 | -0.81595500 | 3.98350500  |
| C  | 0.43435400  | -5.38271700 | -2.46595200 | H | -2.29366500 | -4.58662000 | 2.03727700  |
| C  | 1.56513000  | -4.49834100 | -2.99152900 | H | -1.41348800 | -1.17000300 | 1.66189700  |
| O  | 2.51923900  | -4.16466300 | -2.26940000 | H | -5.07120400 | -3.54445700 | 6.80782100  |
| C  | 0.35659700  | -5.32593900 | -0.93022300 | H | -5.02741200 | -5.14425600 | 6.05801600  |
| C  | -0.58233200 | -6.37443700 | -0.35670300 | H | -4.83825500 | -4.98612100 | 7.81181400  |
| O  | -1.79793500 | -6.20340100 | -0.23732400 | N | -0.42819600 | -0.52043500 | -0.83442400 |
| N  | -0.00464100 | -7.54738500 | 0.01054800  | C | 0.28744500  | -1.49653700 | -1.47412200 |

|   |             |             |             |   |             |             |             |
|---|-------------|-------------|-------------|---|-------------|-------------|-------------|
| O | -0.24867300 | -2.28936400 | -2.27302700 | C | -7.73433500 | 0.09148700  | -2.46944400 |
| N | 1.62435400  | -1.58194300 | -1.22349100 | C | -7.09985300 | 1.40358200  | -1.98010500 |
| C | 2.28353900  | -0.85738300 | -0.15507100 | C | -5.76799200 | 0.95171100  | -1.35955200 |
| C | 1.24957200  | -0.48660000 | 0.89236900  | H | -4.94636900 | 1.65570500  | -1.52251000 |
| C | 0.06311700  | 0.28951000  | 0.27714400  | H | -5.84821900 | 0.79970000  | -0.27594600 |
| O | -0.93082800 | 0.46368500  | 1.19728800  | H | -6.91959000 | 2.07528400  | -2.82573300 |
| H | 2.77211600  | 0.04892500  | -0.52776600 | H | -7.72875200 | 1.93913600  | -1.26351400 |
| H | 3.05303700  | -1.49371200 | 0.29213000  | H | -8.49008100 | 0.24044400  | -3.24449100 |
| H | -1.44514700 | -0.57628500 | -0.91685900 | H | -8.21027400 | -0.43122800 | -1.63196900 |
| H | 2.06523900  | -2.41702700 | -1.60235600 | H | -6.73292100 | -1.79662500 | -2.89318400 |
| O | 0.47454700  | 1.57260100  | -0.22200000 | H | -5.88272100 | 0.65984100  | -4.53739900 |
| H | 0.38191300  | 1.78251400  | -1.53087300 | H | -5.30554400 | -1.01503100 | -4.76264300 |
| C | -1.60257100 | -2.56324400 | -5.21626100 | H | -6.98973400 | -0.60944300 | -5.09023400 |
| C | -2.95528700 | -2.52242600 | -4.52545200 | H | -4.86191400 | -2.70921100 | -2.94590100 |
| O | -4.00066100 | -2.72079100 | -5.14468200 | H | -2.91596500 | -5.14972500 | -1.23367000 |
| N | -2.89090500 | -2.22986200 | -3.20164600 | H | -4.66596200 | -3.45897000 | -0.58145800 |
| C | -4.03806300 | -2.35583000 | -2.32567100 | H | -2.94739900 | -3.03299200 | -0.58221800 |
| C | -4.33368100 | -0.98910000 | -1.69383800 | H | -1.96495600 | -2.20235500 | -2.76707100 |
| O | -3.52376900 | -0.48729900 | -0.88813300 | H | -1.61606000 | -1.86470200 | -6.05811600 |
| C | -3.76518400 | -3.39373100 | -1.21944900 | H | -0.77465700 | -2.32447100 | -4.54887100 |
| O | -3.46776500 | -4.62042500 | -1.84011800 | H | -1.47525800 | -3.56404400 | -5.64498200 |
| N | -5.47538900 | -0.33765600 | -2.00906000 | F | 1.86481000  | 0.27281700  | 1.88309400  |
| C | -6.53303800 | -0.72601200 | -2.98145600 | H | 0.83607900  | -1.38291600 | 1.36367100  |
| C | -6.14233500 | -0.39863400 | -4.42875900 |   |             |             |             |

#### **SkDHPase.5FUH2-INT2-II- D**

|   |             |            |             |    |             |             |             |
|---|-------------|------------|-------------|----|-------------|-------------|-------------|
| C | 3.73224200  | 7.66064900 | -1.83881000 | N  | -3.83016500 | 4.71280300  | -1.11731100 |
| C | 2.93156700  | 6.62965900 | -1.11456500 | C  | -1.75051900 | 4.05708200  | -1.10140900 |
| N | 1.82209200  | 6.90869200 | -0.32710300 | C  | -3.63931300 | 3.89154000  | -0.05603300 |
| C | 3.05404000  | 5.26836700 | -1.06350000 | N  | -2.38352400 | 3.47960400  | -0.02134400 |
| C | 1.32735700  | 5.74210000 | 0.15675600  | C  | 1.69069600  | 3.85741700  | -3.96896700 |
| N | 2.05041000  | 4.72407500 | -0.28076300 | C  | 1.61374800  | 2.85072000  | -2.84652800 |
| C | 7.26052100  | 0.78564000 | -0.33061400 | O  | 2.59185300  | 2.60667100  | -2.12698200 |
| C | 5.98756500  | 1.30486100 | 0.20637600  | O  | 0.42635800  | 2.34115400  | -2.64546000 |
| N | 5.66161300  | 1.30403700 | 1.55282600  | Zn | 2.03037100  | 2.69484500  | 0.22738100  |
| C | 4.90064200  | 1.83683600 | -0.42417100 | Zn | -1.49201200 | 2.29355600  | 1.37047900  |
| C | 4.41900000  | 1.81454000 | 1.69433600  | H  | 3.12715800  | 8.21215500  | -2.56735200 |
| N | 3.93313500  | 2.14395900 | 0.50911200  | H  | 4.17677600  | 8.39137200  | -1.15382100 |
| C | 0.07858700  | 5.06552000 | 4.47463300  | H  | 3.77710300  | 4.63915500  | -1.55416500 |
| N | 1.12362100  | 4.41803500 | 3.73953100  | H  | 1.44861600  | 7.82652700  | -0.13336800 |
| C | 0.85935300  | 3.63227800 | 2.66561200  | H  | 0.46589900  | 5.66459400  | 0.80342700  |
| O | -0.33406800 | 3.66833000 | 2.19128600  | H  | 7.31385200  | 0.97773400  | -1.40435700 |
| O | 1.83641300  | 2.98619100 | 2.19199200  | H  | 7.35997500  | -0.29457100 | -0.18196500 |
| C | -3.76147000 | 3.69303500 | 4.10423400  | H  | 4.73372100  | 1.99887800  | -1.47620200 |
| C | -3.97923800 | 2.33710900 | 3.50684100  | H  | 6.23704000  | 0.94102600  | 2.29888300  |
| N | -3.20364800 | 1.81159100 | 2.47410300  | H  | 3.89070000  | 1.91538800  | 2.62727400  |
| C | -4.93616900 | 1.41507300 | 3.84033300  | H  | -2.76138800 | 3.77987800  | 4.53979900  |
| C | -3.69775500 | 0.60746600 | 2.19542500  | H  | -5.71309100 | 1.43383700  | 4.58778900  |
| N | -4.74493100 | 0.33748800 | 2.99799800  | H  | -5.23940800 | -0.54240300 | 3.02321500  |
| C | -2.45186600 | 5.63555300 | -3.04498000 | H  | -3.34003500 | -0.05720800 | 1.42134600  |
| C | -2.63142700 | 4.83075600 | -1.80502200 | H  | -1.42603100 | 5.52715600  | -3.40175800 |

|   |             |             |             |   |             |             |             |
|---|-------------|-------------|-------------|---|-------------|-------------|-------------|
| H | -3.11709100 | 5.30038200  | -3.84860900 | H | -0.57808500 | -5.07236200 | -2.87846700 |
| H | -0.72339600 | 3.84134900  | -1.33382600 | H | 3.41256500  | -3.55298100 | -4.66781100 |
| H | -4.70529000 | 5.14851100  | -1.36994800 | H | 2.24907400  | -2.21159800 | -4.50773300 |
| H | -4.41159900 | 3.61811100  | 0.64559600  | H | 0.55917600  | -4.29399900 | -4.76014500 |
| H | -0.64624700 | 5.49687600  | 3.78358600  | H | 0.57024800  | -6.41194400 | -2.77361500 |
| H | 0.92128800  | 3.67741200  | -4.72122000 | H | 2.25084600  | -3.22776000 | -5.97133100 |
| H | 1.53849500  | 4.85282300  | -3.53737200 | H | 6.49790200  | -1.77922800 | -4.85581700 |
| H | 8.13114900  | 1.26465300  | 0.13291400  | H | 6.29162600  | -0.17462900 | -4.12701300 |
| H | -3.85771900 | 4.48546800  | 3.35335300  | H | 6.69897000  | -6.00388100 | 3.87042700  |
| H | -4.49445200 | 3.88268000  | 4.89147700  | H | 4.93793200  | -6.11799200 | 3.96093300  |
| H | 0.50208900  | 5.87079100  | 5.08121300  | C | -4.62590600 | -4.49885300 | 6.85878300  |
| H | -0.45880800 | 4.38368300  | 5.14886600  | C | -3.10399600 | -4.33804300 | 6.69172400  |
| H | 4.54631400  | 7.17523300  | -2.38025000 | C | -2.69131100 | -3.71545900 | 5.37254200  |
| H | 2.68152500  | 3.84000700  | -4.42569500 | C | -2.29713500 | -2.37603600 | 5.28390500  |
| H | -2.64257000 | 6.70220000  | -2.87839500 | C | -2.69285500 | -4.46705800 | 4.18598500  |
| H | 2.03880800  | 4.30926900  | 4.14767100  | C | -1.91882300 | -1.79901500 | 4.06804700  |
| C | 5.78136100  | -5.42208600 | 4.01333100  | C | -2.32431500 | -3.91262300 | 2.96452100  |
| C | 5.65365700  | -4.32296200 | 2.95080300  | C | -1.93203900 | -2.56719900 | 2.89646900  |
| C | 6.85403400  | -3.35843000 | 2.89223500  | O | -1.57796800 | -2.07613500 | 1.67678700  |
| C | 6.72840200  | -2.40653000 | 1.69567200  | H | -2.63248900 | -5.32394500 | 6.79141900  |
| C | 7.03644800  | -2.56346200 | 4.19415400  | H | -2.71435000 | -3.72962300 | 7.51652300  |
| C | 6.51003100  | -1.22717600 | -3.91225200 | H | -2.26997200 | -1.76795500 | 6.18573200  |
| C | 5.48743600  | -1.79260200 | -2.93113700 | H | -2.98295600 | -5.51491900 | 4.21999200  |
| S | 5.88092900  | -3.55425200 | -2.52149400 | H | -1.59133400 | -0.76333200 | 4.02853600  |
| C | 0.38027700  | -5.37981600 | -2.44911700 | H | -2.31957200 | -4.50875000 | 2.05666000  |
| C | 1.51535500  | -4.50960700 | -2.98852400 | H | -1.35670800 | -1.11188900 | 1.69322000  |
| O | 2.47929200  | -4.18341900 | -2.27632300 | H | -5.13031700 | -3.52759100 | 6.81344200  |
| C | 0.30950700  | -5.30387000 | -0.91363800 | H | -5.04575100 | -5.12708300 | 6.06638200  |
| C | -0.62465100 | -6.34612200 | -0.32179100 | H | -4.86892500 | -4.96220400 | 7.82058900  |
| O | -1.83971400 | -6.17489700 | -0.19541200 | N | -0.41917100 | -0.49135800 | -0.85059100 |
| N | -0.04371300 | -7.51465400 | 0.05424500  | C | 0.27402400  | -1.47446100 | -1.49771900 |
| N | 1.44228500  | -4.15932800 | -4.29004600 | O | -0.28202300 | -2.27555600 | -2.27699200 |
| C | 2.39463900  | -3.22868600 | -4.88962300 | N | 1.61908800  | -1.56198400 | -1.28338000 |
| H | 5.53542500  | -4.78977700 | 1.96467100  | C | 2.30235100  | -0.84943200 | -0.22117700 |
| H | 4.73576800  | -3.74331600 | 3.12707500  | C | 1.28889900  | -0.46539400 | 0.84076100  |
| H | 7.75827900  | -3.96616600 | 2.73976100  | C | 0.11166000  | 0.33936500  | 0.24160400  |
| H | 6.63571200  | -2.94949000 | 0.74892000  | O | -0.87094000 | 0.51020100  | 1.18617500  |
| H | 7.60848700  | -1.75582700 | 1.62423100  | H | 2.79551300  | 0.05208900  | -0.59889800 |
| H | 5.84048500  | -1.76793700 | 1.80028600  | H | 3.07046200  | -1.49675800 | 0.21269200  |
| H | 7.89206300  | -1.88206700 | 4.12249300  | H | -1.43687300 | -0.54649600 | -0.90426600 |
| H | 6.14367900  | -1.96199800 | 4.41164400  | H | 2.03975800  | -2.41158900 | -1.65186400 |
| H | 7.21254000  | -3.21357300 | 5.05546700  | O | 0.51990400  | 1.58660300  | -0.28989400 |
| H | 5.80163800  | -5.01269100 | 5.02783800  | H | 0.41475100  | 1.84312500  | -1.70395900 |
| H | 5.47079800  | -1.20546200 | -2.00816700 | C | -1.65133100 | -2.55767800 | -5.21345200 |
| H | 4.48384500  | -1.76194800 | -3.35960600 | C | -2.99884700 | -2.50276900 | -4.51302600 |
| H | 4.60691700  | -3.94655000 | -2.29977100 | O | -4.04968900 | -2.69967800 | -5.12376400 |
| H | 7.52624300  | -1.28329900 | -3.50812000 | N | -2.92401700 | -2.20066200 | -3.19183900 |
| H | -0.06845200 | -4.32150500 | -0.62487100 | C | -4.06491300 | -2.32776300 | -2.30738400 |
| H | 1.32003400  | -5.41132200 | -0.50947200 | C | -4.36748900 | -0.96118700 | -1.67867200 |
| H | 0.95223900  | -7.65800400 | 0.01949500  | O | -3.56230800 | -0.45244600 | -0.87375800 |
| H | -0.63021900 | -8.23971600 | 0.44023700  | C | -3.77848000 | -3.35856900 | -1.19827800 |

|   |             |             |             |   |             |             |             |
|---|-------------|-------------|-------------|---|-------------|-------------|-------------|
| O | -3.47869400 | -4.58601500 | -1.81615200 | H | -5.91930900 | 0.70132200  | -4.51091500 |
| N | -5.51510500 | -0.31849800 | -1.99492700 | H | -5.33242700 | -0.96821000 | -4.75417600 |
| C | -6.56538600 | -0.70835900 | -2.97414500 | H | -7.01731100 | -0.56739700 | -5.08318100 |
| C | -6.17341200 | -0.35986900 | -4.41623300 | H | -4.89067400 | -2.68955100 | -2.92017900 |
| C | -7.77738400 | 0.08875400  | -2.45571700 | H | -2.93885500 | -5.11930900 | -1.20195200 |
| C | -7.16003200 | 1.40447000  | -1.95402100 | H | -4.67434300 | -3.42582000 | -0.55359200 |
| C | -5.81937900 | 0.96568100  | -1.34193700 | H | -2.95789800 | -2.99010900 | -0.56876800 |
| H | -5.00745200 | 1.68017100  | -1.50907500 | H | -1.99457700 | -2.17728500 | -2.76285000 |
| H | -5.89014500 | 0.81091300  | -0.25803400 | H | -1.66548700 | -1.86538300 | -6.06049100 |
| H | -6.99249700 | 2.08733400  | -2.79337700 | H | -0.81736900 | -2.32073600 | -4.55275300 |
| H | -7.79470400 | 1.92330500  | -1.23022700 | H | -1.53446900 | -3.56252600 | -5.63558200 |
| H | -8.53489100 | 0.23542800  | -3.22949000 | F | 1.93501500  | 0.28381100  | 1.82306400  |
| H | -8.24654300 | -0.44793200 | -1.62335500 | H | 0.86988900  | -1.35417400 | 1.32070400  |
| H | -6.75294600 | -1.78211400 | -2.89948400 |   |             |             |             |

### **SkDHPase.5FUH2-TS3-II- D**

|    |             |            |             |   |             |             |             |
|----|-------------|------------|-------------|---|-------------|-------------|-------------|
| C  | 2.86946000  | 7.78530000 | -2.39673700 | H | 0.85403600  | 7.95930600  | -0.38867200 |
| C  | 2.20388400  | 6.76452900 | -1.54602400 | H | 0.09716100  | 5.81658900  | 0.75744500  |
| N  | 1.21862700  | 7.04443300 | -0.61042800 | H | 7.19123500  | 1.62556500  | -1.42349700 |
| C  | 2.37034000  | 5.41034800 | -1.47941000 | H | 7.35681400  | 0.44091100  | -0.12419300 |
| C  | 0.83553700  | 5.88213900 | -0.02606300 | H | 4.48080800  | 2.32868000  | -1.60328900 |
| N  | 1.51452800  | 4.87139300 | -0.53931100 | H | 6.01575200  | 1.63760500  | 2.24424300  |
| C  | 7.12693400  | 1.48922000 | -0.34184900 | H | 3.56850600  | 2.36146800  | 2.48497800  |
| C  | 5.77792500  | 1.87270000 | 0.13276400  | H | -3.18140600 | 3.69602500  | 4.29041600  |
| N  | 5.42163600  | 1.90184200 | 1.47179900  | H | -6.01044700 | 1.17332200  | 4.37062400  |
| C  | 4.64723000  | 2.24009100 | -0.54170700 | H | -5.36451100 | -0.84327600 | 2.92999700  |
| C  | 4.12468700  | 2.26788400 | 1.56719800  | H | -3.40707600 | -0.32346800 | 1.39167000  |
| N  | 3.62941700  | 2.47846800 | 0.35919500  | H | -2.16265500 | 4.65459300  | -3.95815700 |
| C  | -0.51311200 | 5.32585600 | 4.11884400  | H | -3.92352900 | 4.74716800  | -4.02097800 |
| N  | 0.60268100  | 4.88600900 | 3.33105500  | H | -1.28834300 | 3.08454700  | -1.82026500 |
| C  | 0.45507100  | 3.78941400 | 2.52553000  | H | -4.95416000 | 5.07511600  | -1.32277900 |
| O  | -0.75178700 | 3.40483600 | 2.35163800  | H | -4.49773400 | 3.74570300  | 0.80083300  |
| O  | 1.51211000  | 3.32166600 | 2.01660100  | H | -1.36331500 | 5.56269000  | 3.47628900  |
| C  | -4.17558500 | 3.51117300 | 3.87356100  | H | 7.91219300  | 2.10317900  | 0.11450400  |
| C  | -4.27837000 | 2.11940700 | 3.32243700  | H | -4.34697400 | 4.27250800  | 3.10361000  |
| N  | -3.42838300 | 1.59084900 | 2.35047100  | H | -4.91671400 | 3.65988700  | 4.66195800  |
| C  | -5.20025900 | 1.16228900 | 3.65902900  | H | -0.23388400 | 6.23129200  | 4.66524200  |
| C  | -3.84593900 | 0.35274700 | 2.11189500  | H | -0.84554300 | 4.57560800  | 4.84858600  |
| N  | -4.91576600 | 0.05923000 | 2.87948700  | H | 3.60445200  | 7.30012900  | -3.04177500 |
| C  | -3.04544100 | 4.99655100 | -3.41452100 | H | -2.99427100 | 6.08916800  | -3.33874100 |
| C  | -3.08692100 | 4.34524700 | -2.07690100 | H | 1.54246500  | 5.06598400  | 3.65008700  |
| N  | -4.12387000 | 4.52075200 | -1.17253600 | C | 6.31680500  | -4.46859400 | 4.49982000  |
| C  | -2.20714600 | 3.50701000 | -1.44468500 | C | 6.07483500  | -3.48078500 | 3.35128200  |
| C  | -3.84634800 | 3.80384500 | -0.05665400 | C | 6.98765700  | -2.23943000 | 3.39046100  |
| N  | -2.68773800 | 3.18330800 | -0.19119200 | C | 6.80772700  | -1.39351100 | 2.12388700  |
| Zn | 1.69296500  | 2.89614500 | 0.01854400  | C | 6.76355700  | -1.38121600 | 4.64449700  |
| Zn | -1.67459800 | 2.09225300 | 1.22461500  | C | 6.62530200  | -0.87990500 | -3.74454300 |
| H  | 2.15752000  | 8.31324100 | -3.04181500 | C | 5.67656900  | -1.37723300 | -2.65730400 |
| H  | 3.39745800  | 8.53843600 | -1.80053700 | S | 6.30262100  | -2.95481100 | -1.91882700 |
| H  | 3.03082900  | 4.77910300 | -2.04926900 | C | 2.20486700  | -6.25107600 | -2.06018300 |

|   |             |             |             |   |             |             |             |
|---|-------------|-------------|-------------|---|-------------|-------------|-------------|
| C | 2.52979300  | -4.85467000 | -2.57451100 | H | -1.35738100 | -1.33326400 | 1.60494700  |
| O | 2.96130600  | -3.97551400 | -1.80776900 | H | -4.88824100 | -3.70001200 | 7.06899000  |
| C | 1.44645300  | -6.23468400 | -0.73133300 | H | -4.34936900 | -5.32588800 | 6.63516500  |
| C | -0.03352800 | -5.90868300 | -0.90864700 | H | -4.29824500 | -4.80337900 | 8.32425200  |
| O | -0.46006000 | -5.38828700 | -1.94551100 | C | -1.33907300 | -3.19807700 | -4.91829800 |
| N | -0.83986700 | -6.22075200 | 0.13123400  | C | -2.68808000 | -3.28961400 | -4.23419900 |
| N | 2.41954800  | -4.66168600 | -3.90145800 | O | -3.71327600 | -3.65119500 | -4.80919700 |
| C | 2.76239900  | -3.39766200 | -4.54248300 | N | -2.64677100 | -2.92143900 | -2.92160500 |
| H | 6.22954700  | -3.99662000 | 2.39502200  | C | -3.80743600 | -2.89132800 | -2.05919500 |
| H | 5.02452800  | -3.15490500 | 3.35767900  | C | -4.10624000 | -1.43380600 | -1.68098100 |
| H | 8.02813800  | -2.59656400 | 3.40790200  | O | -3.24077300 | -0.76823000 | -1.07993300 |
| H | 6.98871900  | -1.97513200 | 1.21372000  | C | -3.52709600 | -3.71433100 | -0.78176800 |
| H | 7.50304600  | -0.54426800 | 2.12312900  | O | -3.18638200 | -5.05257200 | -1.10206300 |
| H | 5.78464200  | -0.99900200 | 2.06430100  | N | -5.30704700 | -0.89375200 | -1.97852400 |
| H | 7.42436600  | -0.50628600 | 4.64534300  | C | -6.40410100 | -1.48254700 | -2.79171100 |
| H | 5.72745400  | -1.02086200 | 4.69037400  | C | -6.08115500 | -1.45655500 | -4.28989500 |
| H | 6.96077800  | -1.93541300 | 5.56612600  | C | -7.59262300 | -0.58214600 | -2.40365400 |
| H | 6.07763300  | -4.03291300 | 5.47461700  | C | -6.95465000 | 0.80484900  | -2.22168300 |
| H | 5.56766800  | -0.63048700 | -1.86568400 | C | -5.59436100 | 0.49583000  | -1.57732800 |
| H | 4.68347600  | -1.56849900 | -3.06822900 | H | -4.78916100 | 1.15965100  | -1.90432000 |
| H | 5.09423300  | -3.45945700 | -1.58612600 | H | -5.63334500 | 0.55516300  | -0.48256200 |
| H | 7.63450200  | -0.71782100 | -3.35176200 | H | -6.81526800 | 1.28832600  | -3.19380800 |
| H | 1.89402100  | -5.47610700 | -0.07816700 | H | -7.56131900 | 1.47415600  | -1.60559400 |
| H | 1.55189900  | -7.19945400 | -0.22335700 | H | -8.38267200 | -0.59903400 | -3.15825900 |
| H | -0.48008800 | -6.63484300 | 0.97551900  | H | -8.02521400 | -0.92407200 | -1.45641400 |
| H | -1.82523100 | -5.96939900 | 0.05933700  | H | -6.58372100 | -2.51272100 | -2.47167600 |
| H | 1.65319600  | -6.82611400 | -2.80878100 | H | -5.86107400 | -0.43781300 | -4.62619500 |
| H | 3.80968600  | -3.15179900 | -4.35184700 | H | -5.23523300 | -2.10237200 | -4.53438800 |
| H | 2.12012200  | -2.59249500 | -4.17500300 | H | -6.94576600 | -1.81932700 | -4.85664400 |
| H | 1.95705800  | -5.37138400 | -4.44880500 | H | -4.61907000 | -3.35771700 | -2.61671600 |
| H | 3.17059000  | -6.74856500 | -1.90885000 | H | -2.39847200 | -5.02768000 | -1.68511500 |
| H | 2.61803200  | -3.50481800 | -5.61840200 | H | -4.43280400 | -3.75533300 | -0.16541700 |
| H | 6.70005700  | -1.60059900 | -4.56326900 | H | -2.74339800 | -3.21824200 | -0.19486000 |
| H | 6.26816500  | 0.07129900  | -4.15518600 | H | -1.75129300 | -2.59398000 | -2.56307800 |
| H | 7.36347000  | -4.79212800 | 4.52714300  | H | -0.98030200 | -2.16598600 | -4.92163300 |
| H | 5.69823100  | -5.36434100 | 4.38399300  | H | -0.59966600 | -3.79528900 | -4.38029800 |
| C | -4.14578700 | -4.47367900 | 7.29160900  | H | -1.44693100 | -3.55619900 | -5.94294800 |
| C | -2.71455000 | -3.94134800 | 7.09198200  | C | 1.29376100  | 3.59981700  | -4.16395100 |
| C | -2.40031000 | -3.48011100 | 5.68057500  | C | 1.19832500  | 2.55033600  | -3.05054300 |
| C | -2.13411600 | -2.13809500 | 5.38554400  | O | 2.08407300  | 2.52430800  | -2.15989900 |
| C | -2.34005100 | -4.39403200 | 4.61579900  | O | 0.16635100  | 1.78804600  | -3.09657600 |
| C | -1.81824600 | -1.71095900 | 4.09189500  | N | -0.24131300 | -0.18675100 | -1.25362200 |
| C | -2.03424700 | -3.98819900 | 3.32136600  | C | 0.51111100  | -1.32199600 | -1.72790800 |
| C | -1.76698900 | -2.63862500 | 3.04269500  | O | 0.02255100  | -2.09466800 | -2.54837700 |
| O | -1.47099700 | -2.31067500 | 1.75762900  | N | 1.77154100  | -1.42907600 | -1.27573300 |
| H | -2.00575800 | -4.72883600 | 7.38089700  | C | 2.30706300  | -0.56949200 | -0.23572100 |
| H | -2.54028900 | -3.11072600 | 7.78588100  | C | 1.21200300  | -0.32659300 | 0.79121400  |
| H | -2.15912400 | -1.40334900 | 6.18744600  | C | -0.01180200 | 0.42757500  | 0.21625300  |
| H | -2.53031900 | -5.44813600 | 4.80567400  | O | -1.11394800 | 0.21308400  | 0.97615600  |
| H | -1.59424400 | -0.66602100 | 3.89722400  | H | 0.70162400  | 3.30457400  | -5.03112700 |
| H | -1.98373700 | -4.70157300 | 2.50482600  | H | 0.91374500  | 4.55151700  | -3.77860600 |

|   |             |             |             |   |            |             |             |
|---|-------------|-------------|-------------|---|------------|-------------|-------------|
| H | 2.66162500  | 0.37462500  | -0.65540600 | O | 0.14356100 | 1.76533100  | 0.00948800  |
| H | 3.15323000  | -1.07537100 | 0.23477500  | H | 0.00701400 | 0.84524300  | -2.14251700 |
| H | 2.33662900  | 3.74824400  | -4.45141700 | F | 1.73125600 | 0.41159100  | 1.85183000  |
| H | -1.24635500 | -0.41249200 | -1.32135500 | H | 0.86223400 | -1.28495100 | 1.18720200  |
| H | 2.25403900  | -2.29299000 | -1.54195900 |   |            |             |             |

### **SkDHPase.5FUH2-EP-II- D**

|    |             |             |             |   |             |             |             |
|----|-------------|-------------|-------------|---|-------------|-------------|-------------|
| C  | 4.54709600  | 6.98622800  | -2.73424900 | H | -5.37467700 | 0.54015000  | 3.26140100  |
| C  | 3.76720400  | 6.19784200  | -1.74935900 | H | -3.53940900 | 0.52120200  | 1.51301300  |
| N  | 3.08470300  | 6.73308900  | -0.66781100 | H | -1.05462400 | 4.90004700  | -4.18304600 |
| C  | 3.53355000  | 4.85589100  | -1.68023400 | H | -2.72823300 | 5.45469300  | -4.28281700 |
| C  | 2.47871600  | 5.72170000  | 0.00235800  | H | -0.66951100 | 3.16246000  | -2.01384900 |
| N  | 2.72599200  | 4.56847500  | -0.59671700 | H | -3.69739600 | 6.05645500  | -1.62829400 |
| C  | 7.38173600  | 0.03903400  | -0.34875900 | H | -3.64714800 | 4.71304200  | 0.52927000  |
| C  | 6.11300900  | 0.66440800  | 0.10484700  | H | -0.01791000 | 6.04618900  | 3.21074100  |
| N  | 5.75949300  | 0.78828500  | 1.44097400  | H | 8.25715300  | 0.52095500  | 0.10150400  |
| C  | 5.07275400  | 1.22323300  | -0.58565300 | H | -3.46326400 | 5.35179900  | 2.91330900  |
| C  | 4.55509000  | 1.39670400  | 1.51771000  | H | -3.71281400 | 4.92117200  | 4.60807000  |
| N  | 4.11535900  | 1.67345800  | 0.30265600  | H | 1.30736900  | 6.43417700  | 4.32150100  |
| C  | 0.74100900  | 5.61690000  | 3.86742100  | H | 0.22647700  | 5.07126800  | 4.66918000  |
| N  | 1.64111500  | 4.78457200  | 3.10851300  | H | 4.97800200  | 6.31416500  | -3.47865100 |
| C  | 1.16939100  | 3.74974700  | 2.34200600  | H | -1.49019700 | 6.50570700  | -3.57558200 |
| O  | -0.10470900 | 3.73187500  | 2.18225100  | H | 2.59816700  | 4.68629400  | 3.41273200  |
| O  | 2.02419100  | 2.96453700  | 1.84967900  | C | 5.34398600  | -5.37069500 | 4.76750000  |
| C  | -3.22335700 | 4.60852300  | 3.68322500  | C | 5.31296900  | -4.41085100 | 3.57117600  |
| C  | -3.67806000 | 3.23190500  | 3.29189300  | C | 6.59534300  | -3.57426500 | 3.39869400  |
| N  | -3.06779600 | 2.47001700  | 2.29547500  | C | 6.55657500  | -2.79105600 | 2.08051000  |
| C  | -4.72781400 | 2.51001400  | 3.79651500  | C | 6.84348100  | -2.62527000 | 4.58113800  |
| C  | -3.74437800 | 1.32822900  | 2.20565000  | C | 6.37928700  | -2.33237300 | -3.63725600 |
| N  | -4.75526800 | 1.32020100  | 3.09578500  | C | 5.29468900  | -2.61123400 | -2.60012200 |
| C  | -1.82725700 | 5.46615300  | -3.65946200 | S | 5.49234500  | -4.30990900 | -1.89270100 |
| C  | -2.06697900 | 4.85293500  | -2.32083400 | C | 0.60063000  | -6.64234300 | -1.98852800 |
| N  | -3.04239800 | 5.30990900  | -1.44588500 | C | 1.36719800  | -5.40117100 | -2.42861500 |
| C  | -1.44958000 | 3.82369100  | -1.65759000 | O | 2.05666900  | -4.75106200 | -1.62639400 |
| C  | -2.98867100 | 4.57437900  | -0.31377200 | C | -0.15693300 | -6.44556200 | -0.67329200 |
| N  | -2.02684300 | 3.66760900  | -0.40785300 | C | -1.59236500 | -5.96458600 | -0.87367800 |
| Zn | 2.38242900  | 2.56894100  | -0.19368500 | O | -2.04322500 | -5.66611100 | -1.98345600 |
| Zn | -1.33932500 | 2.62318800  | 1.17651700  | N | -2.35058800 | -5.92380600 | 0.24885800  |
| H  | 3.92464800  | 7.71547800  | -3.26596400 | N | 1.31599300  | -5.10751100 | -3.74357200 |
| H  | 5.37205400  | 7.53599800  | -2.26627500 | C | 2.06847000  | -4.01143600 | -4.34113000 |
| H  | 3.87083100  | 4.06981000  | -2.33307000 | H | 5.14907200  | -4.98894700 | 2.65307200  |
| H  | 3.04974100  | 7.70888400  | -0.41135500 | H | 4.45199600  | -3.73275500 | 3.66253200  |
| H  | 1.91186000  | 5.85631200  | 0.91043800  | H | 7.44245000  | -4.27410600 | 3.34588100  |
| H  | 7.47274500  | 0.13500600  | -1.43263900 | H | 6.42992300  | -3.45027200 | 1.21526200  |
| H  | 7.42333700  | -1.02694200 | -0.10319400 | H | 7.48499900  | -2.22431000 | 1.93741500  |
| H  | 4.92940300  | 1.32647900  | -1.64955400 | H | 5.71724900  | -2.08262400 | 2.07720000  |
| H  | 6.28770600  | 0.42973700  | 2.22341400  | H | 7.75922800  | -2.04129300 | 4.43265700  |
| H  | 4.02417600  | 1.60893400  | 2.43110900  | H | 6.00871700  | -1.92068900 | 4.69656100  |
| H  | -2.14071400 | 4.62865700  | 3.83120500  | H | 6.95260700  | -3.16190200 | 5.52757300  |
| H  | -5.43726400 | 2.73565700  | 4.57647400  | H | 5.40824000  | -4.83780700 | 5.72118200  |

|   |             |             |             |   |             |             |             |
|---|-------------|-------------|-------------|---|-------------|-------------|-------------|
| H | 5.33753600  | -1.87796900 | -1.78921300 | C | -6.64392800 | -0.31862400 | -2.79401100 |
| H | 4.30311700  | -2.54510300 | -3.05192600 | C | -6.16293100 | -0.23320200 | -4.24571700 |
| H | 4.18465500  | -4.52363900 | -1.62116100 | C | -7.67558900 | 0.76274500  | -2.41969100 |
| H | 7.38087400  | -2.42845200 | -3.20510100 | C | -6.81155700 | 1.97597400  | -2.03843800 |
| H | 0.37958100  | -5.71755600 | -0.05417500 | C | -5.60752600 | 1.35012200  | -1.31831400 |
| H | -0.18691900 | -7.38340800 | -0.10717600 | H | -4.66277200 | 1.86955600  | -1.50260100 |
| H | -1.95727400 | -6.10502000 | 1.15791100  | H | -5.75166300 | 1.32256500  | -0.23028800 |
| H | -3.29976800 | -5.56700600 | 0.16173600  | H | -6.48337300 | 2.50575700  | -2.93845800 |
| H | -0.08829600 | -6.97749000 | -2.76775700 | H | -7.34191400 | 2.69529900  | -1.40838500 |
| H | 3.14333400  | -4.21159300 | -4.29408000 | H | -8.36894000 | 0.96657300  | -3.23916800 |
| H | 1.85819500  | -3.07136200 | -3.82527600 | H | -8.26402900 | 0.43379800  | -1.55548400 |
| H | 0.67227000  | -5.62645300 | -4.32087700 | H | -7.04858200 | -1.31513900 | -2.59680800 |
| H | 1.35943600  | -7.42199800 | -1.85266800 | H | -5.72272200 | 0.74818100  | -4.45336600 |
| H | 1.77355600  | -3.91686400 | -5.38704100 | H | -5.43425100 | -1.01092700 | -4.47980900 |
| H | 6.31192300  | -3.03078400 | -4.47569400 | H | -7.01439300 | -0.36937700 | -4.92206200 |
| H | 6.27883400  | -1.31395500 | -4.02980200 | H | -5.29425600 | -2.51014800 | -2.64260800 |
| H | 6.20273300  | -6.04868200 | 4.70656300  | H | -3.74399600 | -4.77368700 | -1.68407700 |
| H | 4.43953200  | -5.98649100 | 4.79927100  | H | -5.31635400 | -2.95222600 | -0.15909400 |
| C | -4.87378300 | -3.02660100 | 7.48095800  | H | -3.54309800 | -2.93741200 | -0.17199500 |
| C | -3.37140000 | -3.19375800 | 7.19567800  | H | -2.35290000 | -2.64713000 | -2.31634000 |
| C | -2.98709400 | -2.81650500 | 5.78043000  | H | -1.39306400 | -2.00270200 | -4.87773800 |
| C | -2.35053800 | -1.60567500 | 5.48845500  | H | -1.27879700 | -3.59461600 | -4.11204900 |
| C | -3.28413300 | -3.66757500 | 4.70415600  | H | -2.02329800 | -3.42296700 | -5.73868400 |
| C | -2.02046500 | -1.24402800 | 4.17956100  | C | 2.11556900  | 3.14829100  | -4.30970100 |
| C | -2.96775000 | -3.32444000 | 3.39460200  | C | 1.71713000  | 2.28823000  | -3.10486800 |
| C | -2.33143000 | -2.10597400 | 3.12071700  | O | 2.61413200  | 2.17595700  | -2.17897000 |
| O | -2.05109900 | -1.82611500 | 1.81772900  | O | 0.57623800  | 1.79579300  | -3.07035100 |
| H | -3.08690600 | -4.23595200 | 7.38780200  | N | -0.59702400 | -0.58320600 | -1.64633000 |
| H | -2.79792600 | -2.58467200 | 7.90406600  | C | -0.06141000 | -1.84107700 | -1.59730300 |
| H | -2.09572800 | -0.92899800 | 6.30113000  | O | -0.73005100 | -2.88086900 | -1.69890500 |
| H | -3.77155900 | -4.62052100 | 4.89755400  | N | 1.29559200  | -1.90441500 | -1.37035500 |
| H | -1.50587900 | -0.30793600 | 3.98045700  | C | 1.95366200  | -0.91398700 | -0.53174700 |
| H | -3.19680600 | -3.98665300 | 2.56583500  | C | 1.15409900  | -0.56650400 | 0.73661200  |
| H | -1.64106300 | -0.94366700 | 1.71878400  | C | 0.22374700  | 0.64510100  | 0.62435900  |
| H | -5.18578200 | -1.98594100 | 7.34168000  | O | -0.85728700 | 0.65586900  | 1.30241100  |
| H | -5.47477500 | -3.64565000 | 6.80694400  | H | 1.45955700  | 2.94450400  | -5.15739100 |
| H | -5.11468200 | -3.31744600 | 8.50860900  | H | 2.02457600  | 4.20592900  | -4.03800100 |
| C | -1.89896300 | -2.96701400 | -4.75561400 | H | 2.18421300  | -0.00459800 | -1.09315500 |
| C | -3.27281900 | -2.74309200 | -4.14929800 | H | 2.90061100  | -1.34156800 | -0.19418300 |
| O | -4.29826400 | -2.73181600 | -4.82963300 | H | 3.15627300  | 2.96903000  | -4.59285400 |
| N | -3.24778800 | -2.51342000 | -2.80584000 | H | -1.61178000 | -0.53482400 | -1.66798400 |
| C | -4.43670600 | -2.26051000 | -2.01783400 | H | 1.61921400  | -2.86905100 | -1.29719100 |
| C | -4.47124400 | -0.79588800 | -1.54279900 | O | 0.56614600  | 1.67638400  | -0.01940000 |
| O | -3.54078100 | -0.34730100 | -0.84519200 | H | -0.08131800 | 0.19544900  | -2.06533900 |
| C | -4.43364100 | -3.17199500 | -0.77107900 | H | 0.58467600  | -1.43035000 | 1.08983400  |
| O | -4.50847400 | -4.54362800 | -1.11246000 | F | 2.06198000  | -0.21177600 | 1.75220900  |
| N | -5.54335600 | -0.02743500 | -1.83689800 |   |             |             |             |

**SkDHPase.5FU-ES-II**

|   |             |             |             |   |             |             |             |
|---|-------------|-------------|-------------|---|-------------|-------------|-------------|
| C | -2.73099300 | -0.10103300 | -4.80017700 | C | -3.72556600 | -0.17136400 | -5.90158000 |
|---|-------------|-------------|-------------|---|-------------|-------------|-------------|



|    |              |             |              |   |              |              |              |
|----|--------------|-------------|--------------|---|--------------|--------------|--------------|
| N  | -4.08472600  | 0.89721100  | -6.70988300  | H | -6.41829400  | 1.70945900   | -13.52529500 |
| C  | -4.45107900  | -1.22534400 | -6.37659900  | H | -7.24250000  | 0.41643400   | -17.00807500 |
| C  | -4.98981900  | 0.46071700  | -7.62261500  | H | -7.77265000  | -2.10288100  | -16.83736000 |
| N  | -5.22481500  | -0.82929000 | -7.45013200  | H | -6.97953300  | -3.07245900  | -14.66544100 |
| C  | -9.56332600  | -3.95540900 | -4.12769400  | H | -0.94190400  | -2.91582000  | -9.87295200  |
| C  | -9.10249900  | -3.34650600 | -5.41226700  | H | 0.08579600   | -2.78464900  | -11.30599500 |
| N  | -9.92987200  | -2.59713900 | -6.23867700  | H | -3.57342500  | -2.88938400  | -10.42946700 |
| C  | -7.89496300  | -3.36419900 | -6.06089200  | H | -1.15683800  | -0.80144600  | -13.14677500 |
| C  | -9.22070300  | -2.20197000 | -7.32371700  | H | -3.56606200  | -0.60943600  | -13.95900400 |
| N  | -7.98326500  | -2.65578800 | -7.24365800  | H | -5.96624500  | 2.45088900   | -11.12150100 |
| C  | -6.95819100  | 2.60919600  | -10.69330100 | H | -2.21934900  | -4.97114400  | -7.64450000  |
| N  | -7.26179200  | 1.54896400  | -9.75724200  | H | -2.45489700  | -3.26455600  | -7.20997500  |
| C  | -7.20737600  | 0.21948400  | -10.13342400 | H | -9.93042100  | -5.22830000  | -9.27897700  |
| O  | -6.69509100  | 0.00028800  | -11.28615400 | H | -10.02057600 | -3.21041000  | -3.46498700  |
| O  | -7.62294000  | -0.62838500 | -9.29766200  | H | -4.90456700  | 1.50967900   | -14.40869900 |
| C  | -5.99742500  | 1.45357700  | -14.50229300 | H | -6.30752200  | 2.20821000   | -15.23053300 |
| C  | -6.45810500  | 0.09364800  | -14.94023700 | H | -6.96003400  | 3.56479800   | -10.15981500 |
| N  | -6.38222000  | -1.07683400 | -14.17557300 | H | -7.67880200  | 2.67260100   | -11.52047800 |
| C  | -7.01070000  | -0.20799500 | -16.15879900 | H | -2.63981900  | -1.08222000  | -4.32741300  |
| C  | -6.86916100  | -2.03974100 | -14.94910700 | H | -3.16730200  | -4.52426800  | -6.19258900  |
| N  | -7.25435300  | -1.56440000 | -16.15099000 | H | -0.20098100  | -1.36093100  | -10.29317400 |
| C  | -0.67058800  | -2.26303000 | -10.70606800 | H | -7.90483200  | 1.74031800   | -9.00129700  |
| C  | -1.90050600  | -1.95048700 | -11.49103400 | H | -6.76847300  | -5.54190900  | -12.87390700 |
| N  | -1.94657500  | -1.21155000 | -12.66745700 | H | -9.01596000  | -7.32539800  | -9.99012400  |
| C  | -3.20051100  | -2.28267000 | -11.23860900 | O | -6.04920100  | -2.80923200  | -10.27449800 |
| C  | -3.24087800  | -1.12666100 | -13.06914900 | H | -5.42768700  | -3.56139500  | -10.15298000 |
| N  | -4.02750900  | -1.76615200 | -12.21884000 | C | -15.72460200 | -5.23248300  | -8.59995200  |
| C  | -2.92951900  | -4.25382000 | -7.22607700  | C | -14.28163900 | -5.20646500  | -8.07990200  |
| C  | -4.19271800  | -4.17456500 | -8.09062900  | C | -14.11380000 | -4.34335600  | -6.81059800  |
| O  | -5.24610200  | -3.71165600 | -7.52372900  | C | -12.81536600 | -4.68869700  | -6.07321800  |
| O  | -4.10231200  | -4.50132800 | -9.29548900  | C | -14.17913700 | -2.83990800  | -7.12093200  |
| Zn | -6.41701100  | -2.20928500 | -8.47931000  | C | -8.21561900  | -7.89747400  | -4.42193400  |
| Zn | -6.09229500  | -1.73785700 | -11.95589600 | C | -8.14590800  | -7.17745500  | -5.76742700  |
| N  | -7.39180000  | -5.43943300 | -12.06915200 | S | -9.76260500  | -7.05719800  | -6.65521200  |
| C  | -7.79022200  | -6.62013100 | -11.45938800 | C | -9.83081500  | -11.09874300 | -10.95631700 |
| O  | -7.36104700  | -7.72042600 | -11.79137700 | C | -9.07715300  | -10.17376700 | -10.00775900 |
| N  | -8.70416100  | -6.45649200 | -10.44477500 | O | -9.54835800  | -9.07791800  | -9.66661400  |
| C  | -9.23081100  | -5.23904600 | -10.10559600 | C | -10.34949300 | -10.39374200 | -12.2148300  |
| C  | -8.86604800  | -4.12082400 | -10.77431800 | C | -9.32217200  | -10.35331400 | -13.34395500 |
| C  | -7.88751500  | -4.17404500 | -11.83397300 | O | -8.11743500  | -10.54644000 | -13.14608500 |
| O  | -7.51301600  | -3.21172100 | -12.52623400 | N | -9.81871100  | -10.09267700 | -14.57588200 |
| H  | -1.73481400  | 0.18750000  | -5.15977800  | N | -7.93243100  | -10.65877000 | -9.48459500  |
| H  | -3.01963800  | 0.61623800  | -4.02102800  | C | -7.14861800  | -9.92147600  | -8.50393300  |
| H  | -4.47066100  | -2.24866100 | -6.04338200  | H | -13.96787600 | -6.23493400  | -7.85536100  |
| H  | -3.73847700  | 1.84350200  | -6.63397500  | H | -13.60155200 | -4.84032900  | -8.86329200  |
| H  | -5.45917200  | 1.09607400  | -8.36101600  | H | -14.94967300 | -4.58348300  | -6.13624100  |
| H  | -8.71030500  | -4.38719900 | -3.59730100  | H | -12.79056600 | -5.73989000  | -5.76640000  |
| H  | -10.29657000 | -4.75376300 | -4.29248900  | H | -12.70119800 | -4.07699000  | -5.16774000  |
| H  | -6.96421800  | -3.83129100 | -5.77796400  | H | -11.94080900 | -4.52358600  | -6.71554800  |
| H  | -10.91151400 | -2.41597900 | -6.07970500  | H | -14.10636200 | -2.24237300  | -6.20328700  |
| H  | -9.60569900  | -1.59501500 | -8.12810500  | H | -13.35496600 | -2.54395600  | -7.78607600  |

|   |              |              |              |   |              |              |              |
|---|--------------|--------------|--------------|---|--------------|--------------|--------------|
| H | -15.11438300 | -2.55953000  | -7.61643400  | H | -13.27030200 | -2.44380300  | -17.67868800 |
| H | -16.08135400 | -4.23265500  | -8.87160400  | H | -13.14226100 | -1.65802800  | -19.26046900 |
| H | -7.83521000  | -6.13766900  | -5.64072000  | C | -4.78800700  | -9.59698500  | -11.86439800 |
| H | -7.41575700  | -7.64029300  | -6.43685100  | C | -4.58460300  | -9.33998100  | -13.34169700 |
| H | -9.76894200  | -8.28824400  | -7.20835300  | O | -3.64347700  | -9.79555400  | -13.98606300 |
| H | -8.93552600  | -7.41623700  | -3.75267100  | N | -5.54760600  | -8.53521400  | -13.88459900 |
| H | -10.63257500 | -9.36528100  | -11.95754300 | C | -5.54755200  | -8.14134600  | -15.27767100 |
| H | -11.25810400 | -10.89004000 | -12.57495200 | C | -5.29470300  | -6.63042500  | -15.34649900 |
| H | -10.80280700 | -9.94023600  | -14.73591400 | O | -6.14698200  | -5.84481900  | -14.85289000 |
| H | -9.16537700  | -10.04531200 | -15.35688000 | C | -6.90237200  | -8.50699800  | -15.92451400 |
| H | -9.22323700  | -11.96601200 | -11.22999600 | O | -7.18201400  | -9.88736100  | -15.80163100 |
| H | -7.73118400  | -9.76133500  | -7.59146900  | N | -4.17489500  | -6.14296400  | -15.89515000 |
| H | -6.83799200  | -8.95068700  | -8.90303500  | C | -3.05111700  | -6.88162300  | -16.54254400 |
| H | -7.54586100  | -11.50409300 | -9.87894100  | C | -2.02126900  | -7.39225700  | -15.52492800 |
| H | -10.69044800 | -11.46700200 | -10.38249800 | C | -2.49074300  | -5.80619600  | -17.49322500 |
| H | -6.26069800  | -10.50572400 | -8.25594000  | C | -2.64626900  | -4.49861600  | -16.69916400 |
| H | -8.51998100  | -8.94295500  | -4.54109700  | C | -3.98158100  | -4.67660700  | -15.95960000 |
| H | -7.23132900  | -7.88558500  | -3.93681100  | H | -3.98657600  | -4.24750400  | -14.95320800 |
| H | -16.40569300 | -5.63327800  | -7.83992800  | H | -4.82358900  | -4.23368100  | -16.50320000 |
| H | -15.81466700 | -5.86394300  | -9.49119400  | H | -1.82460300  | -4.38669700  | -15.98386300 |
| C | -12.65108500 | -2.36154800  | -18.57849700 | H | -2.64944300  | -3.61143100  | -17.33865800 |
| C | -11.22879700 | -1.89409400  | -18.23366300 | H | -1.45701700  | -6.01595000  | -17.78105700 |
| C | -10.53357600 | -2.85061500  | -17.29076300 | H | -3.09371300  | -5.76654800  | -18.40839800 |
| C | -9.47010100  | -3.66152500  | -17.70581500 | H | -3.45642100  | -7.72499900  | -17.10751400 |
| C | -10.99058000 | -2.99989700  | -15.97123800 | H | -1.62952700  | -6.57269000  | -14.91192400 |
| C | -8.87728000  | -4.58956300  | -16.84033100 | H | -2.45173600  | -8.15387000  | -14.87010900 |
| C | -10.42219500 | -3.92267500  | -15.10380300 | H | -1.18107100  | -7.84771600  | -16.06156100 |
| C | -9.35820200  | -4.72774800  | -15.53258500 | H | -4.75612000  | -8.71806500  | -15.75604700 |
| O | -8.84551800  | -5.62329100  | -14.64484300 | H | -7.16325100  | -10.12028000 | -14.84497300 |
| H | -11.27902300 | -0.89308400  | -17.78329000 | H | -6.87515500  | -8.28279900  | -16.99707200 |
| H | -10.64357900 | -1.79076100  | -19.15594400 | H | -7.69928400  | -7.89871200  | -15.47352300 |
| H | -9.11185900  | -3.59085900  | -18.73177100 | H | -6.27864500  | -8.18162000  | -13.26698800 |
| H | -11.81003300 | -2.37823000  | -15.61751900 | H | -4.61594100  | -8.67743400  | -11.29374600 |
| H | -8.06072500  | -5.21946200  | -17.18370700 | H | -5.81352500  | -9.92183600  | -11.66699700 |
| H | -10.77653700 | -4.02753700  | -14.08304600 | H | -4.07608900  | -10.35824900 | -11.54004600 |
| H | -7.91325700  | -5.83905900  | -14.87675800 | F | -9.38378900  | -2.92392100  | -10.46160300 |
| H | -12.63299100 | -3.34554400  | -19.05976700 |   |              |              |              |

### **SkDHPase.5FU-TS1-II**

|   |             |             |             |   |             |             |              |
|---|-------------|-------------|-------------|---|-------------|-------------|--------------|
| C | -2.73099300 | -0.10103300 | -4.80017700 | N | -7.90638700 | -2.53090700 | -7.13945400  |
| C | -3.56615500 | -0.21808200 | -6.02457100 | C | -6.95819100 | 2.60919300  | -10.69330100 |
| N | -3.56276300 | 0.68549100  | -7.07869500 | N | -7.24851600 | 1.56305100  | -9.74076300  |
| C | -4.45035300 | -1.18699300 | -6.40167600 | C | -7.03438700 | 0.24625700  | -10.04254700 |
| C | -4.42280100 | 0.23942000  | -8.02950900 | O | -6.34199200 | 0.03454500  | -11.10286300 |
| N | -4.97203200 | -0.90006800 | -7.64805600 | O | -7.48086200 | -0.61952200 | -9.23930100  |
| C | -9.56332600 | -3.95540700 | -4.12770200 | C | -5.99742500 | 1.45357700  | -14.50229300 |
| C | -9.06303000 | -3.28065200 | -5.35883500 | C | -6.37820200 | 0.07844100  | -14.96768500 |
| N | -9.81837000 | -2.36972500 | -6.08472100 | N | -6.33934400 | -1.06680800 | -14.16983000 |
| C | -7.87508000 | -3.36232800 | -6.03562100 | C | -6.80709200 | -0.27805400 | -16.22004100 |
| C | -9.09074900 | -1.94369100 | -7.14265900 | C | -6.72752900 | -2.07661900 | -14.94105700 |

|    |              |             |              |   |              |              |              |
|----|--------------|-------------|--------------|---|--------------|--------------|--------------|
| N  | -7.01640900  | -1.64161900 | -16.18457400 | S | -10.25305100 | -7.67949100  | -6.34824900  |
| C  | -0.67058700  | -2.26303000 | -10.70606800 | C | -9.18535900  | -9.78917400  | -11.70511400 |
| C  | -1.89979800  | -1.93378600 | -11.47888800 | C | -8.83498000  | -9.55054600  | -10.24456100 |
| N  | -1.94313100  | -1.10857600 | -12.59451100 | O | -9.44803000  | -8.73183400  | -9.53859500  |
| C  | -3.19678600  | -2.31016600 | -11.26907400 | C | -10.61628100 | -9.38541000  | -12.05364500 |
| C  | -3.23130100  | -1.01325300 | -13.00590400 | C | -10.75742700 | -9.00130800  | -13.52386800 |
| N  | -4.01646400  | -1.72890600 | -12.21670600 | O | -9.82759900  | -8.53533700  | -14.18007900 |
| C  | -2.92952000  | -4.25382000 | -7.22607700  | N | -11.99354400 | -9.17087600  | -14.05688100 |
| C  | -4.19939600  | -4.15422100 | -8.07367500  | N | -7.78557400  | -10.25388900 | -9.77111800  |
| O  | -5.24826900  | -3.69975300 | -7.49428200  | C | -7.14862000  | -9.92147300  | -8.50393000  |
| O  | -4.13455100  | -4.45842500 | -9.28932100  | H | -14.00795000 | -6.21171100  | -7.73269200  |
| Zn | -6.38632200  | -2.20659600 | -8.44882100  | H | -13.58854800 | -4.96258300  | -8.89876700  |
| Zn | -6.04932200  | -1.61574000 | -12.09847700 | H | -14.87259600 | -4.39592500  | -6.18358500  |
| H  | -1.65786700  | -0.10122200 | -5.02984800  | H | -12.64605100 | -5.46879000  | -5.84391900  |
| H  | -2.94699200  | 0.81351600  | -4.23339700  | H | -12.62188200 | -3.76401700  | -5.35968800  |
| H  | -4.72423300  | -2.09260200 | -5.88738900  | H | -11.89421800 | -4.27625400  | -6.90249000  |
| H  | -3.01778500  | 1.53496100  | -7.13177300  | H | -14.07597100 | -2.05691800  | -6.53391700  |
| H  | -4.61544600  | 0.75466500  | -8.95804000  | H | -13.42386700 | -2.50745400  | -8.12347200  |
| H  | -8.76621600  | -4.55992500 | -3.68729800  | H | -15.16907200 | -2.53316300  | -7.83399000  |
| H  | -10.40874200 | -4.61930600 | -4.34212400  | H | -16.02744800 | -4.26856000  | -9.02317400  |
| H  | -6.99893900  | -3.95522400 | -5.82361300  | H | -8.35947100  | -6.25691900  | -5.83854700  |
| H  | -10.77590800 | -2.11217600 | -5.88803800  | H | -7.83958400  | -7.77392000  | -6.55723900  |
| H  | -9.42660200  | -1.23419700 | -7.88138200  | H | -9.96008400  | -8.29615500  | -7.51440400  |
| H  | -6.54899500  | 1.73009100  | -13.59849700 | H | -8.90258500  | -7.48679000  | -3.67363000  |
| H  | -6.97934100  | 0.30898700  | -17.10891800 | H | -10.88184800 | -8.50455000  | -11.45542900 |
| H  | -7.39512300  | -2.21316200 | -16.92723900 | H | -11.33279800 | -10.17076600 | -11.78680600 |
| H  | -6.80712100  | -3.10919000 | -14.63443600 | H | -12.77564800 | -9.50669000  | -13.51536200 |
| H  | -0.92757600  | -2.97073000 | -9.91419700  | H | -12.16035400 | -8.85341000  | -15.00195400 |
| H  | 0.10277400   | -2.72833500 | -11.32993700 | H | -8.49959300  | -9.16515600  | -12.29137900 |
| H  | -3.56701800  | -2.98919500 | -10.51512300 | H | -7.88713300  | -9.94693600  | -7.69942100  |
| H  | -1.15167600  | -0.66247400 | -13.03767200 | H | -6.69130200  | -8.92598200  | -8.54463000  |
| H  | -3.55068300  | -0.43869600 | -13.86171300 | H | -7.25917800  | -10.81120700 | -10.43013800 |
| H  | -5.93003600  | 2.51786700  | -11.04980600 | H | -8.98641900  | -10.83054700 | -11.98431500 |
| H  | -2.20155100  | -4.92047100 | -7.69361000  | H | -6.37584800  | -10.66363400 | -8.29437900  |
| H  | -2.49048900  | -3.25231800 | -7.13872600  | H | -8.32015700  | -8.98664400  | -4.40210000  |
| H  | -9.88795600  | -3.23202300 | -3.36948600  | H | -7.19249800  | -7.64196600  | -4.11749600  |
| H  | -4.92906400  | 1.52511000  | -14.26119100 | H | -16.42632400 | -5.47806800  | -7.79374100  |
| H  | -6.21303500  | 2.18877600  | -15.28233500 | H | -15.84849500 | -5.98578500  | -9.38638400  |
| H  | -7.07194800  | 3.57950000  | -10.20097300 | C | -12.65108500 | -2.36154800  | -18.57849700 |
| H  | -7.62463800  | 2.58617400  | -11.56668000 | C | -13.22832700 | -2.90086900  | -17.25935100 |
| H  | -2.92875600  | -0.95134500 | -4.14290100  | C | -12.13670000 | -3.35483000  | -16.31722700 |
| H  | -3.15887200  | -4.60053700 | -6.21406600  | C | -11.52597700 | -2.45644200  | -15.43503800 |
| H  | -0.22690900  | -1.37518400 | -10.23743600 | C | -11.64463900 | -4.66769100  | -16.35755800 |
| H  | -7.90801900  | 1.73735600  | -8.99670300  | C | -10.44870900 | -2.83861800  | -14.63561700 |
| C  | -15.72461500 | -5.23247800 | -8.59996200  | C | -10.57330400 | -5.07295900  | -15.56675700 |
| C  | -14.28162300 | -5.20647100 | -8.07988900  | C | -9.96222400  | -4.14966400  | -14.70931700 |
| C  | -14.07671000 | -4.20833200 | -6.92061400  | O | -8.89503700  | -4.57475700  | -13.97589700 |
| C  | -12.73553800 | -4.44301900 | -6.21671600  | H | -13.90790200 | -3.73491300  | -17.47601000 |
| C  | -14.19645100 | -2.74662700 | -7.37930900  | H | -13.83519200 | -2.12030200  | -16.78286900 |
| C  | -8.21561800  | -7.89747800 | -4.42193300  | H | -11.89592500 | -1.43470100  | -15.37166500 |
| C  | -8.50976500  | -7.33956300 | -5.81214100  | H | -12.10836300 | -5.38737200  | -17.02986800 |

|   |              |             |              |   |             |              |              |
|---|--------------|-------------|--------------|---|-------------|--------------|--------------|
| H | -9.99055600  | -2.13186300 | -13.94712400 | O | -7.49674400 | -8.28142300  | -15.80180200 |
| H | -10.20340200 | -6.09421600 | -15.59052600 | N | -3.75191500 | -5.55822600  | -15.29588100 |
| H | -8.54352000  | -3.84693100 | -13.41658300 | C | -2.97854200 | -6.39148600  | -16.25746800 |
| H | -11.99405500 | -1.50345800 | -18.39455500 | C | -2.06136800 | -7.39288300  | -15.54607700 |
| H | -12.05923700 | -3.13001100 | -19.08878900 | C | -2.21201000 | -5.31586700  | -17.05167600 |
| H | -13.44703700 | -2.03843500 | -19.25991900 | C | -1.90485800 | -4.23587600  | -16.00142000 |
| N | -7.09513900  | -5.04346800 | -11.50703300 | C | -3.16773000 | -4.21451400  | -15.12659400 |
| C | -7.48424300  | -6.20012100 | -10.87851300 | H | -2.96984200 | -4.01775800  | -14.06907200 |
| O | -7.02158200  | -7.30638600 | -11.17532100 | H | -3.89185500 | -3.46216400  | -15.46413900 |
| N | -8.45537000  | -6.06117400 | -9.91602600  | H | -1.03185800 | -4.52257800  | -15.40507000 |
| C | -9.11250500  | -4.86481000 | -9.70301400  | H | -1.69373300 | -3.25840500  | -16.44591300 |
| C | -8.69550900  | -3.74684900 | -10.31416500 | H | -1.31603800 | -5.72163100  | -17.52957500 |
| C | -7.54469600  | -3.74204200 | -11.23354400 | H | -2.85553800 | -4.90328900  | -17.83832200 |
| O | -7.54351900  | -2.90932800 | -12.24188700 | H | -3.67194700 | -6.92838700  | -16.91063600 |
| H | -9.96641100  | -4.88867100 | -9.03705900  | H | -1.37214200 | -6.87967600  | -14.86518200 |
| H | -6.45467200  | -5.14520100 | -12.30995400 | H | -2.63180400 | -8.13422500  | -14.98135200 |
| H | -8.85444400  | -6.94271400 | -9.58254300  | H | -1.46279600 | -7.93118900  | -16.29081300 |
| O | -6.18706000  | -3.01481500 | -10.27777600 | H | -4.93331600 | -7.89073400  | -15.49981100 |
| H | -5.52096300  | -3.73564300 | -10.07956600 | H | -8.20349000 | -8.49177600  | -15.16775500 |
| C | -4.82811300  | -9.59760100 | -11.88554600 | H | -6.79835400 | -6.43069600  | -16.32050300 |
| C | -4.75514400  | -9.06937400 | -13.30963100 | H | -7.54111500 | -6.49654700  | -14.71912000 |
| O | -4.01731500  | -9.58752200 | -14.14591900 | H | -6.08152600 | -7.59928200  | -12.78218200 |
| N | -5.54462900  | -7.98709000 | -13.55693500 | H | -3.83572500 | -9.49829100  | -11.43228200 |
| C | -5.50702600  | -7.26706600 | -14.81594000 | H | -5.55756500 | -9.07623300  | -11.26537000 |
| C | -4.85371400  | -5.89568600 | -14.59752000 | H | -5.04922800 | -10.67042500 | -11.92497900 |
| O | -5.37007500  | -5.07970700 | -13.80272500 | F | -9.34587300 | -2.58014000  | -10.15006200 |
| C | -6.91545900  | -7.05744100 | -15.42205500 |   |             |              |              |

### **SkDHPase.5FU-INT1-II**

|   |             |             |              |    |              |             |              |
|---|-------------|-------------|--------------|----|--------------|-------------|--------------|
| C | -2.73099300 | -0.10103300 | -4.80017700  | C  | -6.83720400  | -2.03674600 | -15.01190200 |
| C | -3.54694800 | -0.21593900 | -6.03564200  | N  | -7.19620500  | -1.56165300 | -16.22034500 |
| N | -3.51138100 | 0.66844200  | -7.10510100  | C  | -0.67058700  | -2.26303000 | -10.70606800 |
| C | -4.44395500 | -1.17362600 | -6.40701400  | C  | -1.88879600  | -1.92519600 | -11.49545800 |
| C | -4.36722800 | 0.22256700  | -8.05975500  | N  | -1.89788700  | -1.11899900 | -12.62544500 |
| N | -4.94292400 | -0.89940000 | -7.66494800  | C  | -3.19729300  | -2.27366200 | -11.30233100 |
| C | -9.56332600 | -3.95540800 | -4.12769800  | C  | -3.17561500  | -1.00692100 | -13.06210000 |
| C | -9.06259500 | -3.26067000 | -5.34624300  | N  | -3.98897500  | -1.69304100 | -12.27498000 |
| N | -9.84844600 | -2.41959600 | -6.12142100  | C  | -2.92952000  | -4.25382000 | -7.22607800  |
| C | -7.84772000 | -3.27817200 | -5.97617700  | C  | -4.19968700  | -4.14175400 | -8.06601600  |
| C | -9.11339400 | -1.97343700 | -7.16492500  | O  | -5.24356000  | -3.68151300 | -7.48568600  |
| N | -7.89385700 | -2.48024800 | -7.10294400  | O  | -4.14360700  | -4.44416600 | -9.28523600  |
| C | -6.95819100 | 2.60919600  | -10.69330100 | Zn | -6.38790100  | -2.19058800 | -8.41269500  |
| N | -7.23304800 | 1.52931800  | -9.77487600  | Zn | -6.01755500  | -1.54257400 | -12.26449600 |
| C | -6.96776500 | 0.22678400  | -10.09105700 | H  | -1.65425200  | -0.12780300 | -5.01062600  |
| O | -6.24195100 | 0.04343200  | -11.13403800 | H  | -2.93577000  | 0.82530700  | -4.24859100  |
| O | -7.40844500 | -0.66015500 | -9.30590300  | H  | -4.74015800  | -2.06281700 | -5.87717300  |
| C | -5.99742500 | 1.45357800  | -14.50229300 | H  | -2.94916000  | 1.50619300  | -7.16560400  |
| C | -6.44607400 | 0.11620500  | -15.00865300 | H  | -4.53638600  | 0.72268700  | -9.00116000  |
| N | -6.37707800 | -1.04956300 | -14.24953500 | H  | -8.74102300  | -4.48269300 | -3.63736600  |
| C | -6.96470600 | -0.19981300 | -16.23705400 | H  | -10.33850900 | -4.69173300 | -4.37018400  |

|   |              |              |              |   |              |              |              |
|---|--------------|--------------|--------------|---|--------------|--------------|--------------|
| H | -6.94785000  | -3.81611500  | -5.72222700  | H | -8.02531300  | -6.10771700  | -5.63763800  |
| H | -10.83074600 | -2.23220000  | -5.97185700  | H | -7.64959000  | -7.58291400  | -6.50520900  |
| H | -9.47393800  | -1.31913800  | -7.94207200  | H | -9.87400200  | -8.13171900  | -7.34447700  |
| H | -6.40735300  | 1.64935000   | -13.50716300 | H | -8.88606900  | -7.46199600  | -3.67379100  |
| H | -7.18450000  | 0.41106600   | -17.09884000 | H | -9.79091100  | -7.59646800  | -12.15616000 |
| H | -7.64667500  | -2.10415500  | -16.94479000 | H | -11.07138000 | -8.51788800  | -11.36174900 |
| H | -6.91615800  | -3.07360400  | -14.71612200 | H | -12.61076500 | -9.61118300  | -12.68686100 |
| H | -0.94409500  | -2.95569200  | -9.90649200  | H | -12.48867300 | -9.65034600  | -14.41943900 |
| H | 0.09889000   | -2.74938600  | -11.31826000 | H | -8.37386700  | -9.58628600  | -12.33949500 |
| H | -3.59401900  | -2.93614700  | -10.54755800 | H | -7.91685900  | -10.01966700 | -7.73419100  |
| H | -1.08971500  | -0.69846200  | -13.06350900 | H | -6.69277600  | -8.92634800  | -8.43144200  |
| H | -3.46767400  | -0.44037000  | -13.93314700 | H | -7.15492300  | -10.54239800 | -10.53436500 |
| H | -5.92308000  | 2.55489100   | -11.03769800 | H | -9.67652400  | -10.64241100 | -11.78467100 |
| H | -2.20392500  | -4.91573300  | -7.70347400  | H | -6.38132900  | -10.68037200 | -8.33726700  |
| H | -2.48990700  | -3.25387900  | -7.12599100  | H | -8.48621900  | -8.95257300  | -4.53268200  |
| H | -9.98548500  | -3.25163600  | -3.39977900  | H | -7.18987700  | -7.84698000  | -4.03381300  |
| H | -4.90419500  | 1.51585300   | -14.42201700 | H | -16.42841700 | -5.43958500  | -7.78505600  |
| H | -6.32368900  | 2.24823900   | -15.17892900 | H | -15.86036200 | -6.01041600  | -9.36003200  |
| H | -7.10306000  | 3.56161500   | -10.17529900 | C | -12.65108500 | -2.36154800  | -18.57849700 |
| H | -7.61323600  | 2.59477500   | -11.57540800 | C | -13.15236700 | -2.54348000  | -17.13487000 |
| H | -2.95901700  | -0.93798700  | -4.13565500  | C | -12.07584000 | -3.04141100  | -16.19352900 |
| H | -3.15858800  | -4.61330700  | -6.21861500  | C | -11.35041100 | -2.16321700  | -15.38106300 |
| H | -0.21709300  | -1.37512400  | -10.24734600 | C | -11.74524600 | -4.40456800  | -16.13142100 |
| H | -7.90485200  | 1.66706300   | -9.03411700  | C | -10.32503600 | -2.61429500  | -14.54586600 |
| C | -15.72460800 | -5.23248100  | -8.59995500  | C | -10.72763600 | -4.87621800  | -15.30834100 |
| C | -14.28163100 | -5.20646800  | -8.07989900  | C | -10.00379500 | -3.97760100  | -14.51162400 |
| C | -14.06995500 | -4.13491100  | -6.98703200  | O | -9.00512100  | -4.48421600  | -13.73665600 |
| C | -12.80099600 | -4.40572300  | -6.17131700  | H | -13.99554700 | -3.24666200  | -17.13723100 |
| C | -14.04730400 | -2.71235300  | -7.56790800  | H | -13.54945400 | -1.58839000  | -16.76812700 |
| C | -8.21561800  | -7.89747700  | -4.42193300  | H | -11.59389400 | -1.10216400  | -15.39130300 |
| C | -8.31633300  | -7.15480400  | -5.75244400  | H | -12.30074000 | -5.11504400  | -16.74081200 |
| S | -10.02592600 | -7.12142700  | -6.46157000  | H | -9.78909800  | -1.91882000  | -13.90397000 |
| C | -9.24974700  | -9.63461600  | -11.68370200 | H | -10.48953600 | -5.93512900  | -15.25809600 |
| C | -8.83083000  | -9.44440300  | -10.22449400 | H | -8.54557600  | -3.77797100  | -13.22246600 |
| O | -9.48203900  | -8.73673500  | -9.44055500  | H | -11.83326700 | -1.63224500  | -18.61970300 |
| C | -10.27785900 | -8.57390000  | -12.11292400 | H | -12.27405700 | -3.30662000  | -18.98581200 |
| C | -10.84742200 | -8.85394000  | -13.49577200 | H | -13.45448700 | -2.00695200  | -19.23464400 |
| O | -10.24762800 | -8.59088000  | -14.53996000 | N | -6.97732500  | -5.03938100  | -11.44065400 |
| N | -12.07239100 | -9.44050800  | -13.52225700 | C | -7.46776600  | -6.18903800  | -10.89253200 |
| N | -7.74236200  | -10.13577500 | -9.81923400  | O | -7.10279100  | -7.31834000  | -11.25662100 |
| C | -7.14862100  | -9.92147200  | -8.50393100  | N | -8.41948600  | -6.03627400  | -9.91283200  |
| H | -14.03364400 | -6.19297100  | -7.66602000  | C | -9.07261900  | -4.82644700  | -9.71873300  |
| H | -13.57925800 | -5.03185900  | -8.90780200  | C | -8.59656800  | -3.71148100  | -10.27613700 |
| H | -14.92399200 | -4.20137300  | -6.29591000  | C | -7.32859800  | -3.68102800  | -11.08379500 |
| H | -12.82883600 | -5.39211100  | -5.69559200  | O | -7.39125200  | -2.88263700  | -12.16571300 |
| H | -12.68323700 | -3.65851500  | -5.37269500  | H | -9.97145200  | -4.85330400  | -9.11582100  |
| H | -11.90702000 | -4.38170900  | -6.80729800  | H | -6.41388900  | -5.12889600  | -12.29464100 |
| H | -13.96229700 | -1.96072400  | -6.77230500  | H | -8.84628900  | -6.90044600  | -9.57773500  |
| H | -13.19475800 | -2.58342800  | -8.24935700  | O | -6.20304700  | -3.15025300  | -10.22393600 |
| H | -14.95627800 | -2.48254200  | -8.13325400  | H | -5.51995500  | -3.86932200  | -10.00104900 |
| H | -16.01434700 | -4.27920900  | -9.05588300  | C | -4.82810800  | -9.59760800  | -11.88554600 |

|   |             |             |              |   |             |              |              |
|---|-------------|-------------|--------------|---|-------------|--------------|--------------|
| C | -4.69241900 | -9.02856300 | -13.28563400 | H | -1.76582200 | -3.33155500  | -16.74832400 |
| O | -4.01049000 | -9.58299700 | -14.14593600 | H | -1.36614600 | -5.86049100  | -17.65575000 |
| N | -5.36258200 | -7.86180300 | -13.46913500 | H | -2.92127500 | -5.08827400  | -18.00403200 |
| C | -5.51563400 | -7.25038500 | -14.77389100 | H | -3.69314300 | -7.05634800  | -16.92237100 |
| C | -4.90575900 | -5.84414900 | -14.71395600 | H | -1.38684400 | -6.82429100  | -14.89501700 |
| O | -5.43732800 | -4.96901300 | -13.99829500 | H | -2.61614500 | -8.11637000  | -14.94396700 |
| C | -7.00177900 | -7.18322400 | -15.17394900 | H | -1.44874000 | -7.95688900  | -16.25957600 |
| O | -7.50434000 | -8.49853600 | -15.17446700 | H | -4.99301900 | -7.89822500  | -15.47757800 |
| N | -3.78974400 | -5.56523000 | -15.42017200 | H | -8.46158300 | -8.46807900  | -14.97725600 |
| C | -3.00524500 | -6.45926100 | -16.31763600 | H | -7.06932900 | -6.71591000  | -16.17401000 |
| C | -2.06137100 | -7.39288100 | -15.54607600 | H | -7.54028200 | -6.52838300  | -14.47716200 |
| C | -2.26297800 | -5.43416500 | -17.19768500 | H | -5.98868400 | -7.55449100  | -12.72360000 |
| C | -1.96116200 | -4.27667600 | -16.23231800 | H | -3.82756600 | -9.74013300  | -11.46392800 |
| C | -3.21835700 | -4.20772100 | -15.35153100 | H | -5.41958800 | -8.96691000  | -11.22038700 |
| H | -3.01530100 | -3.93413800 | -14.31174700 | H | -5.27669700 | -10.59595400 | -11.96553100 |
| H | -3.95258600 | -3.48799200 | -15.73550900 | F | -9.26568600 | -2.54245900  | -10.16374100 |
| H | -1.07995900 | -4.50920800 | -15.62459400 |   |             |              |              |

### **SkDHPase.5FU-TS2-II**

|   |             |             |              |    |              |             |              |
|---|-------------|-------------|--------------|----|--------------|-------------|--------------|
| C | -2.73099300 | -0.10103300 | -4.80017700  | O  | -5.25809800  | -3.71963300 | -7.43512800  |
| C | -3.54068100 | -0.25173500 | -6.04165400  | O  | -4.16026200  | -4.41044400 | -9.26494900  |
| N | -3.43495400 | 0.56275600  | -7.16180900  | Zn | -6.46740000  | -2.13753000 | -8.44778000  |
| C | -4.48862000 | -1.17610800 | -6.37714400  | Zn | -6.05253900  | -1.52176700 | -12.14105200 |
| C | -4.29771400 | 0.11254800  | -8.10737500  | H  | -1.65642400  | -0.21025400 | -4.99317600  |
| N | -4.94699700 | -0.94962400 | -7.66170900  | H  | -2.88389300  | 0.87377700  | -4.32062500  |
| C | -9.56332600 | -3.95540800 | -4.12769800  | H  | -4.85257700  | -2.00659100 | -5.79620500  |
| C | -9.06943100 | -3.25269400 | -5.33886200  | H  | -2.82616000  | 1.36393500  | -7.25814800  |
| N | -9.85175600 | -2.39061200 | -6.09215300  | H  | -4.42201400  | 0.56152300  | -9.08173500  |
| C | -7.86150000 | -3.27862500 | -5.97895300  | H  | -8.74340100  | -4.50184100 | -3.65447600  |
| C | -9.12121500 | -1.93854300 | -7.13482700  | H  | -10.35198600 | -4.67771600 | -4.36950000  |
| N | -7.90793900 | -2.46381200 | -7.09196700  | H  | -6.96868300  | -3.83308100 | -5.73753400  |
| C | -6.95819100 | 2.60919600  | -10.69330100 | H  | -10.82996100 | -2.19267700 | -5.93012000  |
| N | -7.30464100 | 1.58815400  | -9.74017700  | H  | -9.47670300  | -1.26280800 | -7.89501300  |
| C | -7.02367100 | 0.27688900  | -9.97523000  | H  | -6.57824100  | 1.78091100  | -13.63380400 |
| O | -6.22874800 | 0.03634800  | -10.95392500 | H  | -7.09914100  | 0.31447400  | -17.08549500 |
| O | -7.51900600 | -0.56837800 | -9.17544000  | H  | -7.59267300  | -2.18997700 | -16.84543400 |
| C | -5.99742500 | 1.45357800  | -14.50229300 | H  | -6.93721000  | -3.07513900 | -14.56216000 |
| C | -6.42974500 | 0.09554600  | -14.96329600 | H  | -0.95893500  | -2.72286900 | -9.75777800  |
| N | -6.39551500 | -1.03909600 | -14.15488800 | H  | -0.03124800  | -2.97826300 | -11.23779000 |
| C | -6.91216300 | -0.26433200 | -16.19428800 | H  | -3.63742400  | -2.48702100 | -10.26323100 |
| C | -6.84252300 | -2.05090000 | -14.89317700 | H  | -1.09131400  | -1.17985700 | -13.32372900 |
| N | -7.15887400 | -1.62200600 | -16.13048800 | H  | -3.48970100  | -0.86090600 | -14.12509500 |
| C | -0.67058700 | -2.26303000 | -10.70606800 | H  | -5.91072700  | 2.51044900  | -10.98472700 |
| C | -1.89845300 | -1.92831900 | -11.48241400 | H  | -2.22548100  | -4.92824200 | -7.71786900  |
| N | -1.90530300 | -1.39805100 | -12.76533700 | H  | -2.48247700  | -3.25391600 | -7.16766700  |
| C | -3.21938500 | -2.06356500 | -11.15842300 | H  | -9.96671700  | -3.25710300 | -3.38379600  |
| C | -3.19377100 | -1.24327400 | -13.16004600 | H  | -4.94096100  | 1.46546500  | -14.20640500 |
| N | -4.01441900 | -1.63957400 | -12.20218000 | H  | -6.13137100  | 2.18753700  | -15.30171500 |
| C | -2.92952000 | -4.25382000 | -7.22607800  | H  | -7.10104500  | 3.59171900  | -10.23376700 |
| C | -4.22453700 | -4.14055600 | -8.00667600  | H  | -7.57093400  | 2.56612000  | -11.60479300 |

|   |              |              |              |   |              |             |              |
|---|--------------|--------------|--------------|---|--------------|-------------|--------------|
| H | -3.01959900  | -0.87190500  | -4.08146400  | C | -12.03042000 | -2.97639800 | -16.17416100 |
| H | -3.12402700  | -4.58933500  | -6.20431800  | C | -11.32284100 | -2.11683400 | -15.32673200 |
| H | -0.06323500  | -1.37629400  | -10.48417700 | C | -11.69951600 | -4.34080500 | -16.13168500 |
| H | -8.01443700  | 1.76842600   | -9.04565000  | C | -10.32046700 | -2.58583400 | -14.47245500 |
| C | -15.72460900 | -5.23248100  | -8.59995500  | C | -10.70411300 | -4.82988700 | -15.29170300 |
| C | -14.28163000 | -5.20646800  | -8.07989900  | C | -10.00234200 | -3.95045500 | -14.45318300 |
| C | -14.06454500 | -4.10798900  | -7.01431100  | O | -9.03254600  | -4.47733700 | -13.65602600 |
| C | -12.81517500 | -4.37880100  | -6.16873100  | H | -13.98292400 | -3.12260100 | -17.05900400 |
| C | -14.00409100 | -2.70432500  | -7.63694400  | H | -13.44508100 | -1.47688300 | -16.77075300 |
| C | -8.21561800  | -7.89747700  | -4.42193300  | H | -11.56450700 | -1.05532400 | -15.32133500 |
| C | -8.34366800  | -7.16254100  | -5.75408700  | H | -12.23930100 | -5.03953700 | -16.76836100 |
| S | -10.06986200 | -7.12982700  | -6.42182000  | H | -9.80124800  | -1.90331600 | -13.80370900 |
| C | -9.25581700  | -9.54340000  | -11.67020200 | H | -10.46764700 | -5.88976000 | -15.25819800 |
| C | -8.82997200  | -9.39676100  | -10.20815000 | H | -8.56988400  | -3.78283500 | -13.12388800 |
| O | -9.47627200  | -8.70701900  | -9.40434000  | H | -11.80388200 | -1.67280100 | -18.67958200 |
| C | -10.22441300 | -8.42122200  | -12.08372900 | H | -12.33253900 | -3.33769700 | -18.96179400 |
| C | -10.83657700 | -8.66513800  | -13.45451500 | H | -13.46317300 | -1.99650600 | -19.21781500 |
| O | -10.23021300 | -8.46868000  | -14.50994500 | N | -6.90947100  | -5.01337700 | -11.34491700 |
| N | -12.10925000 | -9.13932000  | -13.45782400 | C | -7.37963200  | -6.16652900 | -10.79769800 |
| N | -7.74550100  | -10.10550200 | -9.82244500  | O | -7.01205300  | -7.29508500 | -11.17040800 |
| C | -7.14862100  | -9.92147200  | -8.50393100  | N | -8.31821200  | -6.02968500 | -9.79998000  |
| H | -14.04294700 | -6.18431000  | -7.64077700  | C | -9.00435700  | -4.83352400 | -9.61777400  |
| H | -13.57667400 | -5.05849200  | -8.91054300  | C | -8.55390200  | -3.71389700 | -10.18437600 |
| H | -14.93084100 | -4.13725300  | -6.33602100  | C | -7.28091200  | -3.64766200 | -10.98916500 |
| H | -12.87160500 | -5.34996100  | -5.66488900  | O | -7.40660200  | -2.88492300 | -12.10655100 |
| H | -12.69748400 | -3.61081600  | -5.38987100  | H | -9.90290800  | -4.87914900 | -9.01536900  |
| H | -11.90962000 | -4.39041800  | -6.78806000  | H | -6.35615900  | -5.09592000 | -12.20337600 |
| H | -13.92247700 | -1.93018500  | -6.86275900  | H | -8.75120300  | -6.89920400 | -9.48995800  |
| H | -13.13530200 | -2.61125700  | -8.30336500  | O | -6.19550100  | -3.06946800 | -10.19028800 |
| H | -14.89692200 | -2.47657700  | -8.22836900  | H | -5.22615200  | -3.88534100 | -9.80767100  |
| H | -16.00742300 | -4.28568100  | -9.07357200  | C | -4.82810700  | -9.59761000 | -11.88554600 |
| H | -8.04415900  | -6.11642700  | -5.65269000  | C | -4.69725400  | -9.02012600 | -13.28176500 |
| H | -7.69804000  | -7.59996600  | -6.51959600  | O | -4.02377600  | -9.57355500 | -14.14978600 |
| H | -9.92335600  | -8.11205700  | -7.33672100  | N | -5.36387300  | -7.85026100 | -13.45558500 |
| H | -8.86721200  | -7.45500300  | -3.66123900  | C | -5.52271900  | -7.23877100 | -14.75929300 |
| H | -9.68088300  | -7.47425900  | -12.13825400 | C | -4.90011500  | -5.83892600 | -14.71483200 |
| H | -10.99819700 | -8.31788200  | -11.31735900 | O | -5.40702600  | -4.95526600 | -13.99441400 |
| H | -12.65168900 | -9.24081900  | -12.61384700 | C | -7.01092700  | -7.16742100 | -15.15152100 |
| H | -12.55887400 | -9.31041000  | -14.34715300 | O | -7.50092000  | -8.48635900 | -15.18578100 |
| H | -8.37956600  | -9.53889300  | -12.32706100 | N | -3.79807700  | -5.57451100 | -15.45194700 |
| H | -7.91888000  | -10.02086700 | -7.73663400  | C | -3.02161700  | -6.48945200 | -16.33379400 |
| H | -6.67891000  | -8.93389500  | -8.41653900  | C | -2.06137200  | -7.39288100 | -15.54607600 |
| H | -7.15472200  | -10.48442900 | -10.54998100 | C | -2.30002000  | -5.48662300 | -17.25493900 |
| H | -9.74033800  | -10.52372800 | -11.78144600 | C | -1.98609900  | -4.30130100 | -16.32747400 |
| H | -6.39227400  | -10.69392900 | -8.34940800  | C | -3.22265400  | -4.21911000 | -15.41751400 |
| H | -8.49322000  | -8.95189800  | -4.52036200  | H | -2.99241200  | -3.93139300 | -14.38706700 |
| H | -7.18129800  | -7.84895100  | -4.05674500  | H | -3.96554900  | -3.50320700 | -15.79239500 |
| H | -16.42985600 | -5.41909100  | -7.78141600  | H | -1.08784900  | -4.51042300 | -15.73613100 |
| H | -15.86627000 | -6.02350300  | -9.34537600  | H | -1.81148100  | -3.36904500 | -16.87371300 |
| C | -12.65108500 | -2.36154800  | -18.57849700 | H | -1.40925400  | -5.92078300 | -17.71747100 |
| C | -13.10588400 | -2.46346400  | -17.11113100 | H | -2.97459700  | -5.16603500 | -18.05811600 |

H -3.71285100 -7.10963200 -16.91039300  
H -1.38612800 -6.80064000 -14.91709600  
H -2.60609600 -8.10418600 -14.92081800  
H -1.45016700 -7.97167900 -16.24886200  
H -5.01253200 -7.89424900 -15.46484700  
H -8.45013600 -8.48017600 -14.95058600  
H -7.08573900 -6.67630100 -16.13947700

H -7.55128300 -6.53357600 -14.43684200  
H -5.96868800 -7.53100400 -12.69679200  
H -3.82599500 -9.76888900 -11.47852500  
H -5.39656500 -8.95934100 -11.20788400  
H -5.30070200 -10.58477600 -11.96889200  
F -9.25503700 -2.56041300 -10.08161400

### **SkDHPase.5FU-INT2-II**

C -2.73099300 -0.10103300 -4.80017700  
C -3.54841400 -0.29803800 -6.03379400  
N -3.44506700 0.49083800 -7.17229200  
C -4.49805000 -1.23114500 -6.34951700  
C -4.30752000 0.02157900 -8.10726800  
N -4.95742600 -1.03217200 -7.63987500  
C -9.56333200 -3.95540900 -4.12770200  
C -9.08478500 -3.26606100 -5.34844000  
N -9.83605200 -2.33273200 -6.04662800  
C -7.90423500 -3.35025400 -6.03063800  
C -9.10978200 -1.89075500 -7.09699100  
N -7.93152900 -2.49275700 -7.11122000  
C -6.95819100 2.60919700 -10.69330100  
N -7.33727000 1.61855800 -9.72435600  
C -7.03622800 0.30629200 -9.90785000  
O -6.20582000 0.03621600 -10.84877400  
O -7.54845700 -0.51536600 -9.09311000  
C -5.99742500 1.45357800 -14.50229300  
C -6.42892000 0.08879300 -14.94040800  
N -6.40336400 -1.02972900 -14.10971000  
C -6.90382500 -0.29206600 -16.16789200  
C -6.84800200 -2.05376600 -14.83266000  
N -7.15409400 -1.64781300 -16.08034300  
C -0.67058800 -2.26303000 -10.70606800  
C -1.90545700 -1.93300500 -11.47301000  
N -1.92463300 -1.55539500 -12.80862900  
C -3.22100400 -1.94975200 -11.10218800  
C -3.21444500 -1.37253000 -13.18630700  
N -4.02385500 -1.60688100 -12.16854800  
C -2.92951900 -4.25382000 -7.22607700  
C -4.24243500 -4.15248300 -7.96163100  
O -5.29052800 -3.84370900 -7.38525100  
O -4.15533100 -4.32717000 -9.26064400  
Zn -6.51885400 -2.13490700 -8.48518500  
Zn -6.06080100 -1.50363000 -12.08008900  
H -1.65717400 -0.20651100 -4.99828400  
H -2.89130100 0.88784700 -4.35347300  
H -4.86991500 -2.04404400 -5.74767400  
H -2.83834300 1.29156900 -7.28540100  
H -4.43570000 0.44975800 -9.09090700  
H -8.76268000 -4.57470200 -3.71472200

H -10.41778100 -4.61090100 -4.33065100  
H -7.04390600 -3.96858200 -5.83212800  
H -10.78451700 -2.05800500 -5.82994100  
H -9.44137200 -1.16344200 -7.81912500  
H -6.60133900 1.81104100 -13.66146900  
H -7.08363900 0.27084800 -17.07069600  
H -7.58747700 -2.22769400 -16.78585900  
H -6.94707800 -3.07112900 -14.48374500  
H -0.94409600 -2.56974400 -9.69361000  
H -0.11614400 -3.09212900 -11.16239700  
H -3.64054400 -2.23168400 -10.15386800  
H -1.11787100 -1.45142200 -13.40889800  
H -3.51991200 -1.08676400 -14.18117400  
H -5.90073800 2.50481600 -10.94352900  
H -2.22275200 -4.89831900 -7.75304600  
H -2.50357200 -3.24568500 -7.15616100  
H -9.86686900 -3.24533800 -3.34793700  
H -4.95048700 1.46236000 -14.17458500  
H -6.09985300 2.16795400 -15.32388100  
H -7.11924400 3.60538900 -10.27059500  
H -7.53718300 2.53658900 -11.62466400  
H -3.00735000 -0.85001700 -4.05400600  
H -3.09302100 -4.61974300 -6.21022500  
H 0.01352300 -1.40850800 -10.62835800  
H -8.06665800 1.81725700 -9.05580100  
C -15.72461000 -5.23248000 -8.59995700  
C -14.28162700 -5.20646800 -8.07989300  
C -14.13442000 -4.61785200 -6.66301000  
C -12.70784600 -4.81996300 -6.13611500  
C -14.52678500 -3.13358700 -6.59844300  
C -8.21561800 -7.89747700 -4.42193300  
C -8.82226200 -7.60236400 -5.79131200  
S -10.36474200 -8.59286800 -6.04327500  
C -9.26848400 -9.51469500 -11.66161400  
C -8.83215700 -9.36258900 -10.20299700  
O -9.45877400 -8.64936000 -9.40137300  
C -10.26831100 -8.41657000 -12.06609600  
C -10.90504700 -8.69293000 -13.41965100  
O -10.33717500 -8.47719600 -14.49271100  
N -12.15489900 -9.22377700 -13.38654700  
N -7.76128100 -10.08950300 -9.81918500



|   |              |              |              |   |             |              |              |
|---|--------------|--------------|--------------|---|-------------|--------------|--------------|
| C | -7.14862100  | -9.92147200  | -8.50393100  | C | -7.38163900 | -6.14461900  | -10.78777600 |
| H | -13.88560100 | -6.23100600  | -8.07351100  | O | -7.01104300 | -7.27384300  | -11.16047600 |
| H | -13.64717400 | -4.63596000  | -8.77518200  | N | -8.33229500 | -6.01701500  | -9.79762400  |
| H | -14.81486300 | -5.17515300  | -6.00130400  | C | -9.02198600 | -4.82106700  | -9.61814200  |
| H | -12.42053200 | -5.87794100  | -6.12514400  | C | -8.55360900 | -3.69455400  | -10.15440700 |
| H | -12.61400500 | -4.43707200  | -5.11136300  | C | -7.26417000 | -3.61347800  | -10.93829200 |
| H | -11.98240200 | -4.28580600  | -6.76691900  | O | -7.41326400 | -2.85823500  | -12.06851200 |
| H | -14.41164700 | -2.73974300  | -5.58083700  | H | -9.94457900 | -4.86649800  | -9.05188500  |
| H | -13.89325500 | -2.53339000  | -7.26713000  | H | -6.35305200 | -5.06458300  | -12.17551600 |
| H | -15.56716900 | -2.96691900  | -6.89468900  | H | -8.77241100 | -6.89394700  | -9.51696600  |
| H | -16.13795000 | -4.22500200  | -8.71676100  | O | -6.18985800 | -3.07027000  | -10.15870100 |
| H | -9.05695800  | -6.53762000  | -5.88993000  | H | -5.03952500 | -4.01067600  | -9.71089000  |
| H | -8.12108300  | -7.86005800  | -6.58837800  | C | -4.82810800 | -9.59760800  | -11.88554600 |
| H | -10.27888600 | -8.65567200  | -7.39056100  | C | -4.70223000 | -9.00448500  | -13.27523500 |
| H | -8.92222700  | -7.67501700  | -3.61406500  | O | -4.04476200 | -9.55611800  | -14.15695700 |
| H | -9.74665100  | -7.45872600  | -12.14220900 | N | -5.35509300 | -7.82371700  | -13.42984200 |
| H | -11.02889000 | -8.32041400  | -11.28553100 | C | -5.55157200 | -7.22656800  | -14.73553200 |
| H | -12.66802500 | -9.35015200  | -12.52773000 | C | -4.91028200 | -5.83394500  | -14.73891500 |
| H | -12.61732500 | -9.42631200  | -14.26256100 | O | -5.39027000 | -4.92578900  | -14.03200600 |
| H | -8.39806500  | -9.48390500  | -12.32571400 | C | -7.05197500 | -7.13252400  | -15.06928400 |
| H | -7.90882100  | -10.02972600 | -7.72770100  | O | -7.57935400 | -8.43725000  | -15.00892000 |
| H | -6.67648500  | -8.93573400  | -8.41384400  | N | -3.82340300 | -5.60100600  | -15.51036600 |
| H | -7.19357100  | -10.49927800 | -10.54829600 | C | -3.05485700 | -6.55065200  | -16.36048400 |
| H | -9.72783500  | -10.50709000 | -11.77266600 | C | -2.06137000 | -7.39288100  | -15.54607600 |
| H | -6.39142400  | -10.69684900 | -8.37007900  | C | -2.37398200 | -5.58861900  | -17.35257400 |
| H | -7.93220200  | -8.95088200  | -4.33487900  | C | -2.04538200 | -4.35514500  | -16.49468900 |
| H | -7.31884400  | -7.28557900  | -4.26245400  | C | -3.24680500 | -4.24653600  | -15.53999600 |
| H | -16.37998200 | -5.78499300  | -7.91558200  | H | -2.97444500 | -3.92771400  | -14.52887800 |
| H | -15.78025600 | -5.72209700  | -9.57879700  | H | -4.00538200 | -3.54206300  | -15.90458800 |
| C | -12.65108500 | -2.36154800  | -18.57849700 | H | -1.12080200 | -4.52189300  | -15.93082200 |
| C | -13.09698000 | -2.41604000  | -17.10551900 | H | -1.90763000 | -3.44783700  | -17.09104800 |
| C | -12.02958700 | -2.92819400  | -16.15808100 | H | -1.49240800 | -6.03517200  | -17.82091900 |
| C | -11.31035700 | -2.06452400  | -15.32457100 | H | -3.07727700 | -5.31621500  | -18.14871400 |
| C | -11.72332700 | -4.29717900  | -16.08491800 | H | -3.74799700 | -7.21407400  | -16.88357100 |
| C | -10.32183300 | -2.53361300  | -14.45401500 | H | -1.38812700 | -6.75562600  | -14.96065700 |
| C | -10.74187500 | -4.78626900  | -15.22859600 | H | -2.58383300 | -8.08139900  | -14.87822800 |
| C | -10.02877400 | -3.90323800  | -14.40288700 | H | -1.45063200 | -7.99553700  | -16.22879500 |
| O | -9.07558200  | -4.43217400  | -13.58809000 | H | -5.07735700 | -7.89933100  | -15.45001300 |
| H | -13.98826100 | -3.05368800  | -17.03152200 | H | -8.54653700 | -8.37922100  | -14.86856000 |
| H | -13.41256400 | -1.41376800  | -16.78905100 | H | -7.15410700 | -6.69151500  | -16.07828600 |
| H | -11.53261300 | -0.99888200  | -15.34233000 | H | -7.54415200 | -6.44692100  | -14.36718700 |
| H | -12.27251800 | -4.99990900  | -16.70900600 | H | -5.96389500 | -7.51686900  | -12.66795900 |
| H | -9.79437600  | -1.84641900  | -13.79665700 | H | -3.82576400 | -9.79250200  | -11.48985400 |
| H | -10.52607200 | -5.84964600  | -15.17224500 | H | -5.38096700 | -8.95947600  | -11.19465400 |
| H | -8.59971700  | -3.73866100  | -13.06364700 | H | -5.31984200 | -10.57443400 | -11.97753800 |
| H | -11.79013600 | -1.69409200  | -18.70340800 | F | -9.25586300 | -2.54097000  | -10.04397500 |
| H | -12.35661900 | -3.35374000  | -18.93920000 |   |             |              |              |
| H | -13.46035300 | -1.99540500  | -19.22069600 |   |             |              |              |
| N | -6.90516800  | -4.98956600  | -11.31742400 |   |             |              |              |

**SkDHPase.5FU-TS3-II**

|    |              |             |              |   |              |              |              |
|----|--------------|-------------|--------------|---|--------------|--------------|--------------|
| C  | -2.73099300  | -0.10103300 | -4.80017800  | H | -9.87584800  | -3.21317100  | -3.38242400  |
| C  | -3.64855500  | -0.24007000 | -5.96317200  | H | -4.90691100  | 1.53769800   | -14.40472300 |
| N  | -3.87146900  | 0.76384700  | -6.89358200  | H | -6.32066200  | 2.21133400   | -15.22143900 |
| C  | -4.42033900  | -1.28442300 | -6.39135800  | H | -6.97931400  | 3.59999700   | -10.22847800 |
| C  | -4.74535900  | 0.30782900  | -7.82330900  | H | -7.70805100  | 2.58819600   | -11.49558700 |
| N  | -5.09044200  | -0.93975500 | -7.54994700  | H | -2.73177000  | -1.02500200  | -4.21646700  |
| C  | -9.56332500  | -3.95541300 | -4.12770100  | H | -0.19236100  | -1.41000200  | -10.20818700 |
| C  | -9.08760900  | -3.31287200 | -5.38136700  | H | -7.77217500  | 1.84136100   | -8.88850400  |
| N  | -9.85895200  | -2.42789500 | -6.12132900  | C | -15.72463000 | -5.23248300  | -8.59996200  |
| C  | -7.90405200  | -3.39735600 | -6.06324100  | C | -14.28161000 | -5.20646400  | -8.07989100  |
| C  | -9.14270600  | -2.01560700 | -7.19170500  | C | -14.13542100 | -4.60303500  | -6.66912700  |
| N  | -7.95111700  | -2.58847500 | -7.18123700  | C | -12.70526300 | -4.78628300  | -6.14700900  |
| C  | -6.95819100  | 2.60919700  | -10.69330100 | C | -14.54207000 | -3.12212500  | -6.61589400  |
| N  | -7.18974200  | 1.61132900  | -9.68160300  | C | -8.21562100  | -7.89747300  | -4.42192900  |
| C  | -7.18537900  | 0.27984500  | -10.03323200 | C | -8.72690800  | -7.43782500  | -5.78276300  |
| O  | -6.74746100  | 0.03651500  | -11.20723200 | S | -10.28585500 | -8.32514100  | -6.24868000  |
| O  | -7.56540900  | -0.53461500 | -9.14519600  | C | -9.82537500  | -10.43412600 | -11.19565600 |
| C  | -5.99742500  | 1.45357700  | -14.50229300 | C | -9.07117500  | -9.78035200  | -10.04279900 |
| C  | -6.42181300  | 0.08759000  | -14.95848100 | O | -9.47159600  | -8.71659300  | -9.53498100  |
| N  | -6.38809300  | -1.05276200 | -14.15560600 | C | -10.66549000 | -9.41241600  | -11.96369100 |
| C  | -6.88780100  | -0.26858300 | -16.19780900 | C | -9.77474400  | -8.35842000  | -12.61972300 |
| C  | -6.81615600  | -2.05903200 | -14.90786000 | O | -8.64553200  | -8.65670100  | -13.02537700 |
| N  | -7.12359600  | -1.62795000 | -16.14802700 | N | -10.29305900 | -7.11898600  | -12.73208900 |
| C  | -0.67058600  | -2.26303000 | -10.70606800 | N | -7.98660100  | -10.43199000 | -9.58646500  |
| C  | -1.93032500  | -1.86890100 | -11.40440100 | C | -7.14861700  | -9.92147600  | -8.50393200  |
| N  | -1.96571700  | -0.98492100 | -12.47440700 | H | -13.88763200 | -6.23157700  | -8.06246800  |
| C  | -3.24057900  | -2.21423100 | -11.19524800 | H | -13.64527900 | -4.64305100  | -8.77982600  |
| C  | -3.25478800  | -0.83058100 | -12.86297600 | H | -14.80847400 | -5.16110700  | -6.00058400  |
| N  | -4.05277500  | -1.55938200 | -12.10263000 | H | -12.40413300 | -5.83999500  | -6.13296400  |
| Zn | -6.46648400  | -2.17644400 | -8.48188700  | H | -12.61052200 | -4.39518000  | -5.12537100  |
| Zn | -6.12105500  | -1.59850700 | -12.10469300 | H | -11.98868100 | -4.25020800  | -6.78566000  |
| H  | -1.69726400  | 0.09352700  | -5.11260300  | H | -14.42198500 | -2.71741000  | -5.60321500  |
| H  | -3.03354800  | 0.71374100  | -4.13053100  | H | -13.91994800 | -2.52180300  | -7.29524000  |
| H  | -4.54228200  | -2.26235200 | -5.95744100  | H | -15.58647200 | -2.96776000  | -6.90442300  |
| H  | -3.46491500  | 1.68909600  | -6.87626900  | H | -16.13230900 | -4.22463400  | -8.73194200  |
| H  | -5.12690700  | 0.91066100  | -8.63379900  | H | -8.91875900  | -6.36095400  | -5.78521300  |
| H  | -8.75693700  | -4.54631400 | -3.68552600  | H | -7.98330200  | -7.63585900  | -6.55919000  |
| H  | -10.41064800 | -4.62720800 | -4.30521800  | H | -9.96291400  | -8.48005900  | -7.55219000  |
| H  | -7.02455800  | -3.98149900 | -5.84224100  | H | -8.96464300  | -7.73786700  | -3.63791400  |
| H  | -10.81410600 | -2.16762300 | -5.91681300  | H | -11.39416700 | -8.94433000  | -11.29585800 |
| H  | -9.48772500  | -1.32106700 | -7.94037400  | H | -11.22195100 | -9.92741100  | -12.75678900 |
| H  | -6.43313200  | 1.68602100  | -13.52617500 | H | -11.20725600 | -6.90072400  | -12.36521000 |
| H  | -7.06792400  | 0.31495000  | -17.08746700 | H | -9.73836300  | -6.35533000  | -13.12139900 |
| H  | -7.53873100  | -2.19466000 | -16.87472100 | H | -9.11882100  | -10.91631000 | -11.87778700 |
| H  | -6.91623100  | -3.08127100 | -14.57537200 | H | -7.73913900  | -9.80391500  | -7.59126700  |
| H  | -0.89676900  | -3.01465600 | -9.94565200  | H | -6.70513400  | -8.96314500  | -8.78894800  |
| H  | 0.06235000   | -2.70003500 | -11.39522600 | H | -7.68056300  | -11.25548800 | -10.08532800 |
| H  | -3.64908200  | -2.91292300 | -10.48162800 | H | -10.47669000 | -11.21527800 | -10.78268900 |
| H  | -1.16533100  | -0.54076700 | -12.90326900 | H | -6.35163200  | -10.64347300 | -8.31719700  |
| H  | -3.56367100  | -0.20757300 | -13.68812700 | H | -7.96990300  | -8.96383000  | -4.43197900  |
| H  | -5.97559200  | 2.46437600  | -11.14830500 | H | -7.31316600  | -7.33843700  | -4.14313700  |

|   |              |             |              |   |             |              |              |
|---|--------------|-------------|--------------|---|-------------|--------------|--------------|
| H | -16.38275900 | -5.77071900 | -7.90704000  | H | -1.41819200 | -3.23510000  | -16.21375000 |
| H | -15.78418400 | -5.73759100 | -9.57073900  | H | -1.21333400 | -5.65279100  | -17.44305400 |
| C | -12.65108500 | -2.36154800 | -18.57849600 | H | -2.69980600 | -4.71954900  | -17.67367300 |
| C | -13.01556300 | -2.47957000 | -17.08866100 | H | -3.63898100 | -6.73140000  | -16.84950300 |
| C | -11.90218600 | -3.02026500 | -16.21098000 | H | -1.30543000 | -6.96840700  | -14.85674400 |
| C | -11.34934800 | -2.25776400 | -15.17530000 | H | -2.65462400 | -8.12044500  | -15.00734500 |
| C | -11.40437700 | -4.32098200 | -16.39380900 | H | -1.50202000 | -7.93167800  | -16.33185000 |
| C | -10.35662900 | -2.76682100 | -14.33195000 | H | -4.88736800 | -7.74353600  | -15.43632900 |
| C | -10.40789900 | -4.84461100 | -15.57560000 | H | -7.89362000 | -8.23781800  | -14.69000900 |
| C | -9.88921700  | -4.07037600 | -14.52760500 | H | -6.65725100 | -6.18402200  | -16.17431500 |
| O | -8.95616600  | -4.65799400 | -13.71671900 | H | -7.28297700 | -6.07235700  | -14.52386100 |
| H | -13.89859100 | -3.12717300 | -16.99431200 | H | -5.99684200 | -7.57311000  | -12.69748500 |
| H | -13.32220900 | -1.49539400 | -16.71335100 | H | -4.31469000 | -8.92112400  | -11.18230400 |
| H | -11.71409200 | -1.24666900 | -15.00550400 | H | -5.85286900 | -9.68623200  | -11.56413400 |
| H | -11.80943000 | -4.94310000 | -17.18909900 | H | -4.31945900 | -10.57069400 | -11.86432600 |
| H | -9.96313300  | -2.17129800 | -13.51192900 | C | -2.97579800 | -4.24489600  | -7.22765000  |
| H | -10.02165500 | -5.84913500 | -15.72934200 | C | -4.23618800 | -4.31081100  | -8.08612200  |
| H | -8.45243500  | -4.01220200 | -13.13484500 | O | -5.30835900 | -3.83295700  | -7.63529600  |
| H | -11.80390000 | -1.68116800 | -18.72423200 | O | -4.07510000 | -4.83059000  | -9.24410400  |
| H | -12.37325100 | -3.33326100 | -19.00177200 | N | -6.43892500 | -5.00221200  | -10.95940600 |
| H | -13.49838600 | -1.97645400 | -19.15671600 | C | -7.04609100 | -6.24995300  | -10.56190900 |
| C | -4.81204300  | -9.59659800 | -11.88594600 | O | -6.46325500 | -7.30533200  | -10.77728400 |
| C | -4.71910400  | -9.04084400 | -13.29348900 | N | -8.22281200 | -6.15833600  | -9.90392200  |
| O | -3.99891700  | -9.54135000 | -14.15530500 | C | -8.95731800 | -4.96939500  | -9.80923100  |
| N | -5.48115300  | -7.92798200 | -13.49637100 | C | -8.46015700 | -3.82327900  | -10.26836300 |
| C | -5.39749300  | -7.12620600 | -14.69886700 | C | -7.12050500 | -3.65870200  | -10.95416500 |
| C | -4.64293800  | -5.82479500 | -14.39197400 | O | -7.29440000 | -3.21314100  | -12.23587700 |
| O | -5.05079200  | -5.07426200 | -13.48181500 | H | -2.23594500 | -4.97422800  | -7.56345500  |
| C | -6.79760400  | -6.74541800 | -15.24034800 | H | -2.54524900 | -3.24033700  | -7.30933200  |
| O | -7.59740100  | -7.85943700 | -15.54332500 | H | -9.93976400 | -5.05041900  | -9.36144600  |
| N | -3.58649800  | -5.46890400 | -15.14869600 | H | -3.22146700 | -4.41990900  | -6.17677500  |
| C | -2.89657200  | -6.28695500 | -16.18003000 | H | -5.96478700 | -5.12677100  | -11.87955200 |
| C | -2.04530500  | -7.39187100 | -15.54647600 | H | -8.66848400 | -7.05420500  | -9.68014900  |
| C | -2.07275200  | -5.21853200 | -16.92470600 | O | -6.25755500 | -2.79151900  | -10.30585600 |
| C | -1.67616700  | -4.22342100 | -15.82094000 | H | -5.29267800 | -4.87372000  | -10.07289700 |
| C | -2.91176800  | -4.18097200 | -14.90731800 | F | -9.20415200 | -2.69682100  | -10.21435600 |
| H | -2.67235400  | -4.07165600 | -13.84557700 |   |             |              |              |
| H | -3.59442100  | -3.36221200 | -15.16907900 |   |             |              |              |
| H | -0.80608900  | -4.59531500 | -15.26901500 |   |             |              |              |

### **SkDHPase.5FU-INT3-II**

|   |             |             |             |   |             |             |              |
|---|-------------|-------------|-------------|---|-------------|-------------|--------------|
| C | -2.73099300 | -0.10103300 | -4.80017700 | C | -9.15351400 | -1.92413700 | -7.12482800  |
| C | -3.57547400 | -0.27726800 | -6.01667400 | N | -7.95393600 | -2.48281000 | -7.11606600  |
| N | -3.52835300 | 0.55981200  | -7.12354900 | C | -6.95819100 | 2.60919600  | -10.69330100 |
| C | -4.50849900 | -1.22368400 | -6.34159800 | N | -7.29050000 | 1.66096400  | -9.66809400  |
| C | -4.40768000 | 0.10560100  | -8.04964400 | C | -7.17188100 | 0.32856000  | -9.93615400  |
| N | -5.01409400 | -0.98203500 | -7.60530500 | O | -6.54064800 | 0.04246100  | -11.00836100 |
| C | -9.56332200 | -3.95541400 | -4.12769600 | O | -7.65149900 | -0.46849300 | -9.07508200  |
| C | -9.09740200 | -3.26933700 | -5.35425700 | C | -5.99742500 | 1.45357700  | -14.50229300 |
| N | -9.87421400 | -2.37509300 | -6.07485400 | C | -6.48289800 | 0.08900000  | -14.89503700 |
| C | -7.90737800 | -3.32191400 | -6.02261100 | N | -6.46137000 | -1.03048900 | -14.06106500 |

|    |              |              |              |   |              |              |              |
|----|--------------|--------------|--------------|---|--------------|--------------|--------------|
| C  | -7.00646100  | -0.28128000  | -16.10693700 | C | -9.83971600  | -8.21503400  | -12.49590000 |
| C  | -6.95328700  | -2.03752800  | -14.77312300 | O | -8.74749800  | -8.56971800  | -12.95343000 |
| N  | -7.29081500  | -1.62823700  | -16.01187700 | N | -10.30487800 | -6.95280200  | -12.58223800 |
| C  | -0.67058700  | -2.26303000  | -10.70606800 | N | -8.03553000  | -10.38288700 | -9.56619500  |
| C  | -1.92707700  | -1.87526400  | -11.40876000 | C | -7.14861700  | -9.92147600  | -8.50393200  |
| N  | -1.95999200  | -1.05975000  | -12.53178700 | H | -13.89624900 | -6.23446800  | -8.04424600  |
| C  | -3.23971100  | -2.17566700  | -11.15901200 | H | -13.64067500 | -4.66145600  | -8.78996600  |
| C  | -3.25284800  | -0.90206700  | -12.90966400 | H | -14.81977100 | -5.10644900  | -6.00489700  |
| N  | -4.05124700  | -1.56257000  | -12.09169400 | H | -12.43782500 | -5.84877800  | -6.09516600  |
| Zn | -6.54986800  | -2.05128800  | -8.46476500  | H | -12.60741600 | -4.37051800  | -5.13319900  |
| Zn | -6.10841700  | -1.60498800  | -12.01512200 | H | -11.97175800 | -4.28991000  | -6.79303400  |
| H  | -1.66026500  | -0.16637800  | -5.03002400  | H | -14.38391500 | -2.66654300  | -5.65398900  |
| H  | -2.90820600  | 0.86552500   | -4.31276700  | H | -13.85262800 | -2.51655400  | -7.34233800  |
| H  | -4.84086500  | -2.07094600  | -5.76436300  | H | -15.53507900 | -2.91339800  | -6.96765100  |
| H  | -2.94816400  | 1.38202700   | -7.21996400  | H | -16.12826700 | -4.22453200  | -8.74372500  |
| H  | -4.57917100  | 0.57614200   | -9.00622300  | H | -9.06103000  | -6.47138600  | -5.82375300  |
| H  | -8.74819900  | -4.54675500  | -3.70224100  | H | -8.18909800  | -7.79905800  | -6.58964700  |
| H  | -10.39854200 | -4.63674800  | -4.32602600  | H | -10.38717300 | -8.52547700  | -7.34227400  |
| H  | -7.02951500  | -3.90954800  | -5.80862800  | H | -8.89001800  | -7.67900000  | -3.58594500  |
| H  | -10.83510100 | -2.13392300  | -5.87348100  | H | -11.42736500 | -8.71428400  | -11.10249400 |
| H  | -9.49979100  | -1.21572700  | -7.85927300  | H | -11.37990400 | -9.69679000  | -12.57354100 |
| H  | -6.46681400  | 1.78595800   | -13.57120200 | H | -11.18653500 | -6.69589400  | -12.16466000 |
| H  | -7.19626600  | 0.28623500   | -17.00490900 | H | -9.73926000  | -6.20817600  | -12.99205400 |
| H  | -7.75809800  | -2.19927800  | -16.70308200 | H | -9.29313100  | -10.80509800 | -11.78164200 |
| H  | -7.08044500  | -3.04653400  | -14.41310700 | H | -7.70765800  | -9.81422200  | -7.57062300  |
| H  | -0.90660700  | -2.94450800  | -9.88491600  | H | -6.69041700  | -8.96723800  | -8.77999400  |
| H  | 0.03066100   | -2.78147800  | -11.37147500 | H | -7.74391900  | -11.16489000 | -10.13514800 |
| H  | -3.65809100  | -2.81728500  | -10.40079500 | H | -10.63455900 | -11.04700500 | -10.65251600 |
| H  | -1.15728200  | -0.66692400  | -13.00419600 | H | -6.36519200  | -10.66847800 | -8.36069200  |
| H  | -3.56391600  | -0.32537400  | -13.76711600 | H | -7.96017900  | -8.96049000  | -4.37382500  |
| H  | -5.91933800  | 2.48465900   | -11.00841300 | H | -7.29711100  | -7.31582900  | -4.27396500  |
| H  | -9.89061100  | -3.24398800  | -3.35879000  | H | -16.38500200 | -5.75990600  | -7.90095700  |
| H  | -4.91147400  | 1.47760500   | -14.34392900 | H | -15.78571600 | -5.74852000  | -9.56480400  |
| H  | -6.23222800  | 2.17746400   | -15.28750500 | C | -12.65108500 | -2.36154800  | -18.57849700 |
| H  | -7.07766400  | 3.62227800   | -10.29657200 | C | -13.00476000 | -2.40821100  | -17.08236000 |
| H  | -7.59371300  | 2.51234500   | -11.58387700 | C | -11.89830000 | -2.92118800  | -16.17771400 |
| H  | -2.96396700  | -0.88437800  | -4.07472000  | C | -11.43899600 | -2.16922600  | -15.08942600 |
| H  | -0.14697000  | -1.39503700  | -10.28524300 | C | -11.32634900 | -4.18936600  | -16.37447600 |
| H  | -7.93682700  | 1.91240300   | -8.93473400  | C | -10.47139800 | -2.66049200  | -14.20660600 |
| C  | -15.72461900 | -5.23249300  | -8.59995400  | C | -10.35133400 | -4.69308400  | -15.51859100 |
| C  | -14.28162300 | -5.20645100  | -8.07990200  | C | -9.93257600  | -3.93396400  | -14.41578100 |
| C  | -14.12914500 | -4.57908500  | -6.68029800  | O | -9.02632700  | -4.51538900  | -13.57302100 |
| C  | -12.70718700 | -4.78728700  | -6.14423100  | H | -13.89592900 | -3.03942000  | -16.95445000 |
| C  | -14.49909300 | -3.08778200  | -6.66059000  | H | -13.29948800 | -1.40473400  | -16.75085600 |
| C  | -8.21562100  | -7.89747300  | -4.42192900  | H | -11.86096500 | -1.18248500  | -14.90909800 |
| C  | -8.85572000  | -7.54468500  | -5.76245100  | H | -11.65516600 | -4.80355800  | -17.20978800 |
| S  | -10.43585400 | -8.48035600  | -5.99218300  | H | -10.15350500 | -2.07538000  | -13.34695800 |
| C  | -9.95337600  | -10.29597400 | -11.07317300 | H | -9.90323600  | -5.67077500  | -15.67865200 |
| C  | -9.13678400  | -9.70193500  | -9.93100100  | H | -8.52113000  | -3.88676500  | -12.97434900 |
| O  | -9.49544300  | -8.66391100  | -9.34611100  | H | -11.79377100 | -1.70316600  | -18.76147100 |
| C  | -10.75883100 | -9.22165500  | -11.80390700 | H | -12.39619600 | -3.35439500  | -18.96514900 |

|   |              |             |              |   |             |              |              |
|---|--------------|-------------|--------------|---|-------------|--------------|--------------|
| H | -13.49741300 | -1.98589800 | -19.16409900 | H | -7.11977000 | -5.77348100  | -14.12397800 |
| C | -4.81204300  | -9.59659800 | -11.88594500 | H | -5.83791100 | -7.43616200  | -12.49526600 |
| C | -4.73412200  | -8.96265400 | -13.26060500 | H | -4.24903900 | -8.99789400  | -11.16240700 |
| O | -4.10551700  | -9.46765000 | -14.18971100 | H | -5.84513700 | -9.63618500  | -11.53091400 |
| N | -5.40116700  | -7.77763200 | -13.34949600 | H | -4.38524800 | -10.60011300 | -11.93947100 |
| C | -5.32375900  | -6.91783200 | -14.51092000 | C | -2.97579800 | -4.24489600  | -7.22765000  |
| C | -4.44739600  | -5.69723100 | -14.19328200 | C | -4.30275100 | -4.31065400  | -7.95588100  |
| O | -4.72922900  | -4.96969600 | -13.22209100 | O | -5.34458100 | -3.88733900  | -7.45337400  |
| C | -6.71974400  | -6.39867700 | -14.93019200 | O | -4.22086500 | -4.80461300  | -9.17582300  |
| O | -7.61013700  | -7.42122800 | -15.29695500 | N | -6.39278400 | -5.01504600  | -10.81931800 |
| N | -3.41852000  | -5.38106800 | -15.00862300 | C | -6.94309300 | -6.22698200  | -10.41505700 |
| C | -2.83923500  | -6.20514900 | -16.10039800 | O | -6.37731100 | -7.30218700  | -10.63930800 |
| C | -2.04530500  | -7.39187100 | -15.54647600 | N | -8.09949000 | -6.16137400  | -9.68558300  |
| C | -1.96978900  | -5.17176100 | -16.84267500 | C | -8.86533000 | -4.99838500  | -9.62635800  |
| C | -1.44501700  | -4.26118300 | -15.71975900 | C | -8.40778000 | -3.85043700  | -10.12527000 |
| C | -2.63289200  | -4.16246200 | -14.74957800 | C | -7.08391300 | -3.67499600  | -10.82735600 |
| H | -2.34180200  | -4.11699900 | -13.69603900 | O | -7.27222800 | -3.19854900  | -12.10166100 |
| H | -3.25800400  | -3.28210800 | -14.94868800 | H | -2.26450900 | -4.97108200  | -7.62624700  |
| H | -0.58477900  | -4.72530100 | -15.22524300 | H | -2.56282700 | -3.23721000  | -7.35240900  |
| H | -1.12437800  | -3.28010700 | -16.08413100 | H | -9.84289600 | -5.08770800  | -9.16782500  |
| H | -1.17281600  | -5.64701600 | -17.42130600 | H | -3.13141400 | -4.41391600  | -6.16013700  |
| H | -2.59040600  | -4.59227800 | -17.53709400 | H | -5.78641400 | -5.11190200  | -11.64966100 |
| H | -3.64052900  | -6.56749300 | -16.75122600 | H | -8.54026800 | -7.06109300  | -9.47783900  |
| H | -1.25650400  | -7.05032100 | -14.86559500 | O | -6.20273100 | -2.79526900  | -10.18282600 |
| H | -2.68617800  | -8.10161100 | -15.01828800 | H | -5.10266700 | -4.76941800  | -9.67011000  |
| H | -1.56597900  | -7.93208700 | -16.37230000 | F | -9.19186500 | -2.74222400  | -10.09895100 |
| H | -4.91647000  | -7.52826800 | -15.31522400 |   |             |              |              |
| H | -7.90940200  | -7.86939300 | -14.47695800 |   |             |              |              |
| H | -6.59137100  | -5.75311900 | -15.81047000 |   |             |              |              |

#### SkDHPase.5FU-TS4-II

|   |             |             |              |    |              |             |              |
|---|-------------|-------------|--------------|----|--------------|-------------|--------------|
| C | -2.73099300 | -0.10103300 | -4.80017700  | N  | -6.38263800  | -1.05018100 | -14.15450900 |
| C | -3.67101200 | -0.20813500 | -5.94519200  | C  | -6.88193500  | -0.27301900 | -16.19879200 |
| N | -3.94024000 | 0.82473700  | -6.83016900  | C  | -6.80668200  | -2.06006400 | -14.90402300 |
| C | -4.42693200 | -1.25415100 | -6.39242200  | N  | -7.11383500  | -1.63296800 | -16.14554600 |
| C | -4.82566600 | 0.38213200  | -7.75583800  | C  | -0.67058700  | -2.26303000 | -10.70606800 |
| N | -5.13243400 | -0.88333200 | -7.52054600  | C  | -1.92506200  | -1.84789300 | -11.39932500 |
| C | -9.56332200 | -3.95541300 | -4.12769700  | N  | -1.95021800  | -0.95894700 | -12.46533300 |
| C | -9.09935900 | -3.30960700 | -5.38251700  | C  | -3.23865700  | -2.17773000 | -11.18886400 |
| N | -9.87940100 | -2.43135300 | -6.12152800  | C  | -3.23733600  | -0.78655000 | -12.85153700 |
| C | -7.91489000 | -3.38195900 | -6.06291500  | N  | -4.04304700  | -1.50858400 | -12.09262500 |
| C | -9.16587400 | -2.00999100 | -7.19040300  | Zn | -6.47141400  | -2.14256400 | -8.45228600  |
| N | -7.96908600 | -2.57144500 | -7.17882600  | Zn | -6.10350200  | -1.56218500 | -12.10643100 |
| C | -6.95819100 | 2.60919700  | -10.69330100 | H  | -1.70804200  | 0.12694900  | -5.12567900  |
| N | -7.21056000 | 1.61698200  | -9.68203300  | H  | -3.03190200  | 0.67767500  | -4.08802300  |
| C | -7.22456500 | 0.28548600  | -10.03864300 | H  | -4.51637100  | -2.24979300 | -5.99302100  |
| O | -6.80071500 | 0.04520000  | -11.21897800 | H  | -3.55465200  | 1.75808700  | -6.78785900  |
| O | -7.60750800 | -0.52737400 | -9.15217200  | H  | -5.24355300  | 1.00247800  | -8.53561400  |
| C | -5.99742400 | 1.45357700  | -14.50229300 | H  | -8.75050200  | -4.54219400 | -3.69175900  |
| C | -6.41851000 | 0.08761700  | -14.95983700 | H  | -10.40787500 | -4.63246100 | -4.29899200  |

|   |              |              |              |   |              |              |              |
|---|--------------|--------------|--------------|---|--------------|--------------|--------------|
| H | -7.02932900  | -3.95679900  | -5.84185500  | H | -8.90284800  | -7.68116100  | -3.59595700  |
| H | -10.83627400 | -2.17844600  | -5.91585100  | H | -11.43830900 | -8.72310300  | -11.11726500 |
| H | -9.51627000  | -1.31764700  | -7.93863100  | H | -11.38026100 | -9.71939700  | -12.57755000 |
| H | -6.42471900  | 1.67851400   | -13.52071300 | H | -11.23054800 | -6.73146000  | -12.28560300 |
| H | -7.06280100  | 0.30749800   | -17.09024600 | H | -9.74659000  | -6.24575500  | -13.05283100 |
| H | -7.52634200  | -2.20273000  | -16.87138600 | H | -9.31385900  | -10.83653000 | -11.76493800 |
| H | -6.90426300  | -3.08171500  | -14.56923900 | H | -7.70025600  | -9.81510900  | -7.56605900  |
| H | -0.90602900  | -3.01451900  | -9.94833900  | H | -6.69729900  | -8.96529200  | -8.78225200  |
| H | 0.05448800   | -2.70772800  | -11.39866200 | H | -7.77846800  | -11.20708200 | -10.09105500 |
| H | -3.65558300  | -2.87351200  | -10.47683200 | H | -10.64895500 | -11.03939000 | -10.6212080  |
| H | -1.14475700  | -0.52205300  | -12.89214000 | H | -6.35924100  | -10.66306700 | -8.36711900  |
| H | -3.53885100  | -0.15632600  | -13.67389000 | H | -7.95671000  | -8.95951100  | -4.37002300  |
| H | -5.97240700  | 2.45304200   | -11.13759300 | H | -7.30158700  | -7.31262300  | -4.26094800  |
| H | -9.87509900  | -3.21604100  | -3.37917000  | H | -16.37985700 | -5.78141800  | -7.91284900  |
| H | -4.90642000  | 1.54403100   | -14.41657400 | H | -15.78268600 | -5.72641800  | -9.57656900  |
| H | -6.33259600  | 2.21321200   | -15.21400400 | C | -12.65108500 | -2.36154800  | -18.57849700 |
| H | -6.97322400  | 3.60159200   | -10.23130000 | C | -13.00528800 | -2.44094500  | -17.08367700 |
| H | -7.69960300  | 2.59457700   | -11.50343000 | C | -11.89170500 | -2.97230500  | -16.20031300 |
| H | -2.70142100  | -1.04946100  | -4.25793100  | C | -11.34116800 | -2.19996900  | -15.17072200 |
| H | -0.17862300  | -1.41951100  | -10.20533600 | C | -11.39370600 | -4.27488200  | -16.36961100 |
| H | -7.80092400  | 1.85466900   | -8.89688600  | C | -10.35136900 | -2.70156400  | -14.31907400 |
| C | -15.72462000 | -5.23249100  | -8.59995600  | C | -10.39982900 | -4.79090900  | -15.54371100 |
| C | -14.28162200 | -5.20645200  | -8.07990000  | C | -9.88465900  | -4.00695900  | -14.50121000 |
| C | -14.13626600 | -4.61074800  | -6.66562500  | O | -8.95708100  | -4.59256800  | -13.68238000 |
| C | -12.71603700 | -4.82609200  | -6.12815800  | H | -13.89395400 | -3.07737400  | -16.96796100 |
| C | -14.51244300 | -3.12177800  | -6.61383900  | H | -13.29987900 | -1.44540300  | -16.72928400 |
| C | -8.21562100  | -7.89747300  | -4.42192900  | H | -11.70577900 | -1.18709500  | -15.01184200 |
| C | -8.83703900  | -7.54672500  | -5.77150800  | H | -11.79661900 | -4.90453600  | -17.15995500 |
| S | -10.40781500 | -8.49241600  | -6.02331700  | H | -9.96126600  | -2.09797200  | -13.50321900 |
| C | -9.96290300  | -10.30498700 | -11.06276000 | H | -10.01199200 | -5.79655600  | -15.68598400 |
| C | -9.12879900  | -9.69788400  | -9.94027500  | H | -8.44466300  | -3.95492300  | -13.10222900 |
| O | -9.46107700  | -8.63603500  | -9.38059900  | H | -11.79826300 | -1.69351700  | -18.74663300 |
| C | -10.76398700 | -9.23719800  | -11.80834500 | H | -12.38686300 | -3.34547700  | -18.98171000 |
| C | -9.83926300  | -8.23525800  | -12.49904700 | H | -13.49903400 | -1.98110300  | -19.15877000 |
| O | -8.72315100  | -8.58000900  | -12.90410100 | C | -4.81204300  | -9.59659800  | -11.88594500 |
| N | -10.31755000 | -6.98185600  | -12.63459900 | C | -4.73337900  | -9.02832600  | -13.28849700 |
| N | -8.03996000  | -10.38803200 | -9.56078800  | O | -4.04370900  | -9.53314800  | -14.17215700 |
| C | -7.14861700  | -9.92147600  | -8.50393200  | N | -5.47565000  | -7.89672200  | -13.46206400 |
| H | -13.88781100 | -6.23188600  | -8.06787400  | C | -5.39889900  | -7.08305100  | -14.65662000 |
| H | -13.64503700 | -4.63942400  | -8.77661800  | C | -4.60965000  | -5.80159700  | -14.35003300 |
| H | -14.82782700 | -5.15591500  | -6.00550900  | O | -4.98496600  | -5.05534200  | -13.42323500 |
| H | -12.44339900 | -5.88749000  | -6.09989000  | C | -6.80419400  | -6.66485600  | -15.15526400 |
| H | -12.62150600 | -4.43025400  | -5.10843000  | O | -7.64607800  | -7.75558300  | -15.43014700 |
| H | -11.97912400 | -4.31324000  | -6.76279300  | N | -3.56069800  | -5.45568600  | -15.12220700 |
| H | -14.40263800 | -2.72302100  | -5.59768400  | C | -2.89381300  | -6.27660400  | -16.16571800 |
| H | -13.86561400 | -2.53266700  | -7.27992500  | C | -2.04530500  | -7.39187100  | -15.54647600 |
| H | -15.54787200 | -2.94465300  | -6.92122300  | C | -2.06827100  | -5.21390700  | -16.91634100 |
| H | -16.13673900 | -4.22490500  | -8.71995400  | C | -1.64074700  | -4.23278500  | -15.81144900 |
| H | -9.04779400  | -6.47476900  | -5.83590400  | C | -2.85990300  | -4.18235400  | -14.87608000 |
| H | -8.15645700  | -7.79778500  | -6.58839700  | H | -2.60080800  | -4.09063800  | -13.81726700 |
| H | -10.36067400 | -8.49976500  | -7.37394200  | H | -3.53360400  | -3.34940200  | -15.11520200 |

|   |             |              |              |   |             |             |              |
|---|-------------|--------------|--------------|---|-------------|-------------|--------------|
| H | -0.76584600 | -4.61977000  | -15.27797900 | N | -6.32193400 | -4.99455900 | -10.86380000 |
| H | -1.37720100 | -3.24456900  | -16.20076600 | C | -6.94834500 | -6.24404300 | -10.49334400 |
| H | -1.22307900 | -5.65541800  | -17.45166800 | O | -6.36646100 | -7.30147400 | -10.70043700 |
| H | -2.70086100 | -4.70118200  | -17.65122800 | N | -8.14369400 | -6.15181500 | -9.86959900  |
| H | -3.64932800 | -6.71134200  | -16.82680400 | C | -8.89073700 | -4.96968700 | -9.80083800  |
| H | -1.29467200 | -6.97894700  | -14.86214700 | C | -8.41065900 | -3.81372600 | -10.25200700 |
| H | -2.65728500 | -8.11671000  | -15.00497700 | C | -7.07052400 | -3.60729400 | -10.91992400 |
| H | -1.51546000 | -7.93367900  | -16.33956000 | O | -7.23058900 | -3.21641300 | -12.21018200 |
| H | -4.91917200 | -7.70307000  | -15.41226200 | H | -2.25160600 | -4.97939500 | -7.58565100  |
| H | -7.93131500 | -8.12629500  | -14.56966100 | H | -2.53198300 | -3.24508100 | -7.29817400  |
| H | -6.67912600 | -6.10857300  | -16.09442700 | H | -9.88183300 | -5.06236200 | -9.37475500  |
| H | -7.24741400 | -5.97853400  | -14.42471200 | H | -3.21131200 | -4.43389800 | -6.17677400  |
| H | -5.95109100 | -7.53226700  | -12.64302100 | H | -5.85489400 | -5.11696500 | -11.78767200 |
| H | -4.28810800 | -8.93948700  | -11.18444900 | H | -8.61759100 | -7.04527800 | -9.69368400  |
| H | -5.84856000 | -9.66754200  | -11.54599300 | O | -6.23222800 | -2.72859500 | -10.28191100 |
| H | -4.34044600 | -10.58128800 | -11.88294700 | H | -5.29937900 | -4.85047100 | -10.03540000 |
| C | -2.97579900 | -4.24489700  | -7.22765200  | F | -9.18841800 | -2.70780700 | -10.21591600 |
| C | -4.25141100 | -4.27859000  | -8.07370000  |   |             |             |              |
| O | -5.30527200 | -3.77719600  | -7.59573900  |   |             |             |              |
| O | -4.13686700 | -4.78905400  | -9.23719000  |   |             |             |              |

### SkDHPase.5FU-EP-II

|   |             |             |              |    |              |             |              |
|---|-------------|-------------|--------------|----|--------------|-------------|--------------|
| C | -2.73099400 | -0.10103300 | -4.80017800  | N  | -4.00096000  | -1.73784100 | -12.28155600 |
| C | -3.57395500 | -0.22175200 | -6.01980100  | Zn | -6.37509000  | -2.24418400 | -8.40963600  |
| N | -3.60132900 | 0.70011100  | -7.05755200  | Zn | -6.00488900  | -1.48079100 | -12.25319000 |
| C | -4.43881600 | -1.20440200 | -6.40768700  | H  | -1.66062300  | -0.06905300 | -5.03969200  |
| C | -4.45936100 | 0.25286600  | -8.00891800  | H  | -2.96700300  | 0.79898700  | -4.21855100  |
| N | -4.97912400 | -0.90608400 | -7.64418300  | H  | -4.68982700  | -2.12469600 | -5.90755500  |
| C | -9.56332600 | -3.95541700 | -4.12769600  | H  | -3.07614500  | 1.56269400  | -7.09940700  |
| C | -9.08385100 | -3.29842700 | -5.37544800  | H  | -4.67113700  | 0.78143100  | -8.92547000  |
| N | -9.85622000 | -2.41799100 | -6.12181700  | H  | -8.75128600  | -4.53600000 | -3.68239500  |
| C | -7.89013100 | -3.36280400 | -6.04162700  | H  | -10.39796700 | -4.63954600 | -4.31721900  |
| C | -9.12980000 | -1.98815700 | -7.17915700  | H  | -7.00639400  | -3.94039600 | -5.81908100  |
| N | -7.93094200 | -2.54453700 | -7.15474300  | H  | -10.82009100 | -2.17754100 | -5.93396300  |
| C | -6.95819100 | 2.60919600  | -10.69330100 | H  | -9.48075500  | -1.30329100 | -7.93423000  |
| N | -7.26412800 | 1.55470800  | -9.75552400  | H  | -6.41563700  | 1.64824500  | -13.51029800 |
| C | -7.03306300 | 0.24469500  | -10.06687600 | H  | -7.16271800  | 0.39413300  | -17.10187800 |
| O | -6.31820500 | 0.06479000  | -11.12403500 | H  | -7.59488300  | -2.12778700 | -16.94826000 |
| O | -7.48224600 | -0.63749300 | -9.28466300  | H  | -6.88490400  | -3.08736500 | -14.71964200 |
| C | -5.99742500 | 1.45357600  | -14.50229300 | H  | -0.91574800  | -2.95682200 | -9.89820700  |
| C | -6.43052400 | 0.11048000  | -15.00857700 | H  | 0.10423000   | -2.73260000 | -11.32430800 |
| N | -6.35376200 | -1.05471000 | -14.24755700 | H  | -3.63144900  | -2.98743200 | -10.55594000 |
| C | -6.94106200 | -0.21322600 | -16.23814000 | H  | -1.10269800  | -0.73361100 | -13.05152800 |
| C | -6.80139500 | -2.04815300 | -15.00999900 | H  | -3.47435600  | -0.48331300 | -13.93833800 |
| N | -7.16182300 | -1.57689200 | -16.21925500 | H  | -5.90959400  | 2.55726300  | -10.99546700 |
| C | -0.67058800 | -2.26303000 | -10.70606800 | H  | -9.89399500  | -3.22141500 | -3.38227400  |
| C | -1.90579600 | -1.96052200 | -11.48748100 | H  | -4.90528700  | 1.52593100  | -14.41634000 |
| N | -1.91324800 | -1.15618900 | -12.61963800 | H  | -6.32746000  | 2.24322600  | -15.18271800 |
| C | -3.21558200 | -2.31867600 | -11.29981300 | H  | -7.13225000  | 3.57476400  | -10.20960800 |
| C | -3.18528700 | -1.04848100 | -13.06535500 | H  | -7.57747500  | 2.56265900  | -11.59922200 |

|   |              |              |              |   |              |              |              |
|---|--------------|--------------|--------------|---|--------------|--------------|--------------|
| H | -2.89982100  | -0.96595700  | -4.15407800  | C | -11.65052400 | -2.64309500  | -15.18701600 |
| H | -0.23893600  | -1.35872200  | -10.25899800 | C | -11.17948400 | -4.47268200  | -16.66203000 |
| H | -7.93213600  | 1.71936700   | -9.01688600  | C | -10.56622100 | -2.99800100  | -14.38030000 |
| C | -15.72463100 | -5.23250100  | -8.59995100  | C | -10.09095200 | -4.83924400  | -15.87722900 |
| C | -14.28160600 | -5.20644000  | -8.07990400  | C | -9.77638700  | -4.09963400  | -14.72820400 |
| C | -14.12736300 | -4.55993400  | -6.68921400  | O | -8.69106900  | -4.49819200  | -14.00478400 |
| C | -12.70920800 | -4.77369700  | -6.14564500  | H | -13.76339300 | -3.82690700  | -17.44603000 |
| C | -14.48266300 | -3.06488700  | -6.69311200  | H | -13.75829400 | -2.22691600  | -16.72234300 |
| C | -8.21562100  | -7.89747300  | -4.42192900  | H | -12.25682200 | -1.78470200  | -14.90501600 |
| C | -8.87107200  | -7.55188700  | -5.75690500  | H | -11.41367600 | -5.06226800  | -17.54627900 |
| S | -10.47137400 | -8.46107500  | -5.94846600  | H | -10.33821300 | -2.43653000  | -13.47723300 |
| C | -10.07728500 | -10.26204200 | -10.93455400 | H | -9.47616500  | -5.69588500  | -16.13717600 |
| C | -9.16989900  | -9.64671500  | -9.87779600  | H | -8.51163500  | -3.87919400  | -13.26494900 |
| O | -9.48492300  | -8.60066000  | -9.28427200  | H | -12.04619100 | -1.46205600  | -18.41431200 |
| C | -10.56270600 | -9.25344400  | -11.98057700 | H | -12.03774200 | -3.07868700  | -19.13580600 |
| C | -9.63310000  | -9.14283700  | -13.18932300 | H | -13.50272200 | -2.08634300  | -19.21096900 |
| O | -8.55778100  | -9.74565800  | -13.25824000 | C | -4.81204300  | -9.59659900  | -11.88594600 |
| N | -10.09577000 | -8.37190200  | -14.20365500 | C | -4.66680700  | -9.10571000  | -13.31206400 |
| N | -8.06079900  | -10.34241300 | -9.55903100  | O | -3.84317800  | -9.57881100  | -14.09274600 |
| C | -7.14861700  | -9.92147600  | -8.50393200  | N | -5.49523900  | -8.06675900  | -13.61804200 |
| H | -13.90186700 | -6.23581200  | -8.02983100  | C | -5.48307500  | -7.39338900  | -14.90052400 |
| H | -13.63718500 | -4.67596600  | -8.79735900  | C | -4.86616300  | -5.98837400  | -14.76389200 |
| H | -14.82527100 | -5.07000800  | -6.00795500  | O | -5.37538600  | -5.16760900  | -13.97683700 |
| H | -12.45116400 | -5.83687400  | -6.07752200  | C | -6.92919200  | -7.23652400  | -15.41397200 |
| H | -12.60729000 | -4.34060800  | -5.14163500  | O | -7.56283800  | -8.48208700  | -15.64445600 |
| H | -11.96708600 | -4.29649900  | -6.80161600  | N | -3.81996000  | -5.63768400  | -15.54202600 |
| H | -14.36791500 | -2.62964500  | -5.69238100  | C | -2.97439200  | -6.51525400  | -16.39307300 |
| H | -13.82732500 | -2.51043300  | -7.38029600  | C | -2.04530500  | -7.39187100  | -15.54647600 |
| H | -15.51545500 | -2.88477100  | -7.00781300  | C | -2.22887100  | -5.48190800  | -17.25919100 |
| H | -16.12409000 | -4.22458900  | -8.75625400  | C | -2.00485500  | -4.29773900  | -16.30379600 |
| H | -9.05708900  | -6.47579100  | -5.82980300  | C | -3.28690200  | -4.26592100  | -15.45602500 |
| H | -8.22426500  | -7.83075100  | -6.59162700  | H | -3.11873400  | -3.98992400  | -14.41086300 |
| H | -10.46456900 | -8.48427700  | -7.29989000  | H | -4.03027000  | -3.56458400  | -15.85756000 |
| H | -8.87067400  | -7.65138200  | -3.57821200  | H | -1.13193800  | -4.48275900  | -15.66867100 |
| H | -10.66626100 | -8.26633700  | -11.51421600 | H | -1.83409900  | -3.35384700  | -16.83056800 |
| H | -11.55834900 | -9.53727800  | -12.34209900 | H | -1.29984200  | -5.88672900  | -17.67007700 |
| H | -10.90812000 | -7.78277900  | -14.09734100 | H | -2.86218900  | -5.17318900  | -18.09988400 |
| H | -9.48120900  | -8.23263400  | -15.00415900 | H | -3.61286500  | -7.14758100  | -17.01667500 |
| H | -9.59221900  | -11.10678100 | -11.43105600 | H | -1.41789000  | -6.77858000  | -14.88856200 |
| H | -7.67646800  | -9.86926000  | -7.54759900  | H | -2.60359300  | -8.10926200  | -14.94166800 |
| H | -6.71228500  | -8.94216700  | -8.72532200  | H | -1.38143000  | -7.96464100  | -16.20571800 |
| H | -7.79709400  | -11.11750500 | -10.15017700 | H | -4.92189800  | -8.02778700  | -15.58631100 |
| H | -10.94413700 | -10.65043700 | -10.38551800 | H | -7.58291700  | -8.99372200  | -14.80324000 |
| H | -6.34545900  | -10.65658100 | -8.42510800  | H | -6.91560400  | -6.71357000  | -16.37801900 |
| H | -7.98175800  | -8.96489100  | -4.36084500  | H | -7.48627400  | -6.61336900  | -14.70224500 |
| H | -7.28269000  | -7.33346100  | -4.29998000  | H | -6.20207100  | -7.80081400  | -12.92595800 |
| H | -16.38769200 | -5.74827300  | -7.89474300  | H | -4.20891500  | -8.96458500  | -11.22247900 |
| H | -15.78723700 | -5.76019600  | -9.55836300  | H | -5.84990100  | -9.55289900  | -11.54615600 |
| C | -12.65108500 | -2.36154800  | -18.57849700 | H | -4.43099700  | -10.61832700 | -11.82538300 |
| C | -13.12517400 | -2.95676600  | -17.24141600 | C | -2.97579700  | -4.24489600  | -7.22764900  |
| C | -11.97812100 | -3.36421900  | -16.34081300 | C | -4.21728900  | -4.19759600  | -8.11863300  |



|   |             |             |              |   |             |             |              |
|---|-------------|-------------|--------------|---|-------------|-------------|--------------|
| O | -5.27937500 | -3.71542400 | -7.56628100  | H | -2.21813900 | -4.90632000 | -7.65385900  |
| O | -4.12482100 | -4.57234600 | -9.30178800  | H | -2.55930000 | -3.23369600 | -7.14274000  |
| N | -6.17838500 | -5.57148200 | -11.16075400 | H | -9.67815700 | -5.20510500 | -9.19454400  |
| C | -7.13030400 | -6.47886400 | -10.87709600 | H | -3.23205000 | -4.57708600 | -6.21676800  |
| O | -7.36993300 | -7.49558100 | -11.53654800 | H | -5.71783500 | -5.65007300 | -12.06747400 |
| N | -7.93777500 | -6.19057500 | -9.74853500  | H | -8.46641200 | -7.02944700 | -9.48777900  |
| C | -8.73007100 | -5.04972900 | -9.70332100  | O | -6.36612400 | -2.87874300 | -10.34001400 |
| C | -8.57525700 | -3.83100300 | -10.24532400 | H | -5.66728600 | -5.08228700 | -10.41779900 |
| C | -7.45261500 | -3.14880900 | -10.94073200 | F | -9.65379800 | -2.98090100 | -10.15411700 |
| O | -7.63379700 | -2.71408800 | -12.12484300 |   |             |             |              |

### SkDHPase.PTA-ES-II

|    |             |             |             |   |             |             |             |
|----|-------------|-------------|-------------|---|-------------|-------------|-------------|
| C  | -6.20441700 | -5.40411000 | -3.67679100 | H | -5.13893900 | -6.71117700 | -1.37430700 |
| C  | -5.36115600 | -4.92840000 | -2.54463500 | H | -3.70411500 | -5.35229000 | 0.23840800  |
| N  | -4.92263500 | -5.73226000 | -1.50153100 | H | -7.36026700 | 1.78207000  | -1.26385200 |
| C  | -4.82277300 | -3.69999700 | -2.28334500 | H | -7.28871700 | 2.51289000  | 0.34422300  |
| C  | -4.15277300 | -4.98162800 | -0.67267500 | H | -5.04179500 | 0.16675700  | -1.68267900 |
| N  | -4.06544200 | -3.74256500 | -1.12677600 | H | -6.54687500 | 0.39039500  | 2.23740000  |
| C  | -7.36226500 | 1.56112600  | -0.19339500 | H | -4.53780000 | -1.20566800 | 2.23739500  |
| C  | -6.22847900 | 0.64390200  | 0.13519100  | H | 0.71540800  | -5.80332900 | 2.99700600  |
| N  | -6.00390400 | 0.15792700  | 1.41726700  | H | 4.16658200  | -4.70069800 | 4.20709200  |
| C  | -5.24119400 | 0.07200000  | -0.62629800 | H | 4.58890200  | -2.30863900 | 3.33653300  |
| C  | -4.93002600 | -0.66762500 | 1.38869700  | H | 3.00494300  | -1.69658100 | 1.49740400  |
| N  | -4.44456600 | -0.73871300 | 0.16215900  | H | -0.32590800 | -4.52388000 | -4.80954200 |
| C  | -2.29938200 | -6.00697500 | 2.98134400  | H | 1.22262900  | -5.29959100 | -5.16407400 |
| N  | -2.95217300 | -4.83661100 | 2.43149900  | H | -0.42318100 | -3.29416100 | -2.44416700 |
| C  | -2.22237400 | -3.79354000 | 1.89597200  | H | 2.25101000  | -6.51534800 | -2.65188000 |
| O  | -0.97079700 | -4.02765100 | 1.75536800  | H | 2.43181100  | -5.51884700 | -0.31092800 |
| O  | -2.85075300 | -2.74734700 | 1.57194100  | H | -1.64494000 | -6.45379500 | 2.23009300  |
| C  | 1.79357700  | -5.94527700 | 2.87734300  | H | -2.15375300 | -1.91584100 | -5.51631800 |
| C  | 2.48804400  | -4.62480300 | 2.73266100  | H | -3.11555200 | -3.14189700 | -4.66139700 |
| N  | 2.11188300  | -3.61269600 | 1.84364800  | H | -8.33207400 | 1.10977900  | 0.05093400  |
| C  | 3.59471400  | -4.21486400 | 3.43137400  | H | 1.94092500  | -6.58717100 | 1.99828700  |
| C  | 3.00041800  | -2.64070600 | 2.01419600  | H | 2.17979900  | -6.48250400 | 3.74817900  |
| N  | 3.91173100  | -2.96103800 | 2.95488300  | H | -3.06296000 | -6.73943000 | 3.26049100  |
| C  | 0.36387300  | -5.30494200 | -4.48102300 | H | -1.69325900 | -5.78164000 | 3.86929400  |
| C  | 0.75936200  | -5.02774400 | -3.07203900 | H | -6.40565700 | -4.57239700 | -4.35659200 |
| N  | 1.70369100  | -5.72830200 | -2.33136300 | H | -3.82919800 | -1.55802800 | -4.99519200 |
| C  | 0.29479600  | -4.06615500 | -2.22380700 | H | -0.13934400 | -6.27429600 | -4.59111800 |
| C  | 1.77280200  | -5.17472400 | -1.09345900 | H | -3.86027800 | -4.57536200 | 2.78941200  |
| N  | 0.92569900  | -4.16234500 | -0.99931800 | C | -4.19649900 | 5.48111200  | 5.65510200  |
| C  | -2.89798600 | -2.06858000 | -4.73121300 | C | -4.37163600 | 4.73770800  | 4.32470900  |
| C  | -2.36139900 | -1.59068400 | -3.37698500 | C | -5.84823400 | 4.49637400  | 3.94619300  |
| O  | -3.23613800 | -1.33183900 | -2.47293500 | C | -5.98772900 | 4.03950400  | 2.48768300  |
| O  | -1.12163900 | -1.54417200 | -3.21812700 | C | -6.53723700 | 3.50022200  | 4.89185700  |
| Zn | -2.99581200 | -2.03558700 | -0.49946300 | C | -5.77120700 | 4.10817800  | -3.09579700 |
| Zn | 0.24229300  | -3.03535700 | 0.58713200  | C | -4.58413100 | 4.03449700  | -2.13683700 |
| H  | -5.70934400 | -6.19430200 | -4.25553100 | S | -4.31327900 | 5.67378500  | -1.31728500 |
| H  | -7.17137900 | -5.79826400 | -3.33911900 | C | 1.12729100  | 7.26375500  | -1.79976900 |
| H  | -4.90067000 | -2.78466300 | -2.84511000 | C | 0.03327300  | 6.21837700  | -2.00264100 |

|   |             |             |             |   |             |             |             |
|---|-------------|-------------|-------------|---|-------------|-------------|-------------|
| O | -0.70565600 | 5.87418100  | -1.07419400 | H | 5.84922700  | 1.15344300  | 7.42213400  |
| C | 1.96095500  | 7.01756500  | -0.53755800 | H | 4.17216000  | 0.91189700  | 7.92716300  |
| C | 3.15045500  | 6.09287500  | -0.77470200 | H | 5.47433100  | 0.03477900  | 8.74710300  |
| O | 3.24871700  | 5.38838600  | -1.78778300 | N | 1.24260200  | 0.66015900  | -0.24914500 |
| N | 4.09451500  | 6.08882500  | 0.19511700  | C | 0.81096700  | 1.98893200  | -0.38873200 |
| N | -0.12624400 | 5.75931800  | -3.26459200 | O | 1.33513200  | 2.82163300  | -1.10649400 |
| C | -1.17433500 | 4.81200100  | -3.61648100 | C | -0.50961100 | 0.92061000  | 1.20813000  |
| H | -3.89589600 | 5.32637900  | 3.52855900  | C | 0.56253700  | 0.00663900  | 0.75599800  |
| H | -3.84003900 | 3.77540000  | 4.36359900  | O | 0.86896700  | -1.10081300 | 1.19832700  |
| H | -6.36899800 | 5.46142300  | 4.03901000  | H | 2.16411000  | 0.35251300  | -0.56445300 |
| H | -7.04518200 | 3.92366500  | 2.21751200  | O | -1.06345300 | -1.96888300 | -0.48561500 |
| H | -5.49241100 | 3.07128600  | 2.32719900  | H | -0.83993300 | -1.67118600 | -1.39590400 |
| H | -5.54401700 | 4.75731600  | 1.78782500  | C | 2.43907400  | 2.91782500  | -4.26697800 |
| H | -7.59068300 | 3.36219700  | 4.61965100  | C | 3.80092400  | 2.42110000  | -3.83600200 |
| H | -6.04711700 | 2.51671700  | 4.84599600  | O | 4.72551400  | 2.21800400  | -4.61774200 |
| H | -6.50982700 | 3.83207500  | 5.93463500  | N | 3.89863900  | 2.19670500  | -2.48825900 |
| H | -4.58679900 | 4.90725200  | 6.50249700  | C | 5.14000500  | 1.78907000  | -1.85913200 |
| H | -4.74746600 | 3.27191100  | -1.36917500 | C | 4.97453500  | 0.37345000  | -1.29486800 |
| H | -3.67620000 | 3.76484600  | -2.68114500 | O | 4.15376100  | 0.17955200  | -0.35813800 |
| H | -2.97417300 | 5.57855700  | -1.15080200 | C | 5.51524100  | 2.78340500  | -0.73661200 |
| H | -6.68828800 | 4.40961300  | -2.57668300 | O | 5.69744400  | 4.08917300  | -1.24058800 |
| H | 1.31490300  | 6.57492200  | 0.23112700  | N | 5.67930700  | -0.65440800 | -1.78065500 |
| H | 2.32814200  | 7.96824700  | -0.13301300 | C | 6.64435200  | -0.67464800 | -2.91670000 |
| H | 4.03830600  | 6.69830600  | 0.99685100  | C | 5.92844100  | -0.78885300 | -4.26832700 |
| H | 4.92398600  | 5.51439500  | 0.05633000  | C | 7.49990400  | -1.90615000 | -2.56533500 |
| H | 1.77654000  | 7.34031700  | -2.67673600 | C | 6.48850500  | -2.89323600 | -1.95794200 |
| H | -2.15963100 | 5.28706700  | -3.57201500 | C | 5.52179700  | -1.99380500 | -1.17000500 |
| H | -1.15613300 | 3.95979700  | -2.93084900 | H | 4.47815200  | -2.31726700 | -1.22762200 |
| H | 0.54622100  | 6.02872600  | -3.96709000 | H | 5.78013100  | -1.92798100 | -0.10735700 |
| H | 0.60362400  | 8.22158000  | -1.69188800 | H | 5.95360900  | -3.42732000 | -2.75024200 |
| H | -0.99702900 | 4.45497300  | -4.63303700 | H | 6.96075400  | -3.64327100 | -1.31741200 |
| H | -5.58802800 | 4.83241100  | -3.89537800 | H | 8.01899500  | -2.30513600 | -3.44091800 |
| H | -5.94943100 | 3.12727100  | -3.55356300 | H | 8.25639500  | -1.63338800 | -1.81997400 |
| H | -4.71961000 | 6.44461200  | 5.63557600  | H | 7.24720600  | 0.23646400  | -2.89501700 |
| H | -3.13869200 | 5.68320900  | 5.85808800  | H | 5.27406600  | -1.66734500 | -4.29850800 |
| C | 5.13099800  | 0.40489300  | 7.77415500  | H | 5.34054800  | 0.10677900  | -4.48090100 |
| C | 4.99610000  | -0.74265800 | 6.76173900  | H | 6.67358200  | -0.89267800 | -5.06551800 |
| C | 4.52326100  | -0.24126100 | 5.41647200  | H | 5.90112800  | 1.83355000  | -2.63793200 |
| C | 5.37871700  | -0.16424500 | 4.31077700  | H | 4.85701100  | 4.37814800  | -1.66949200 |
| C | 3.21548200  | 0.24741600  | 5.26579900  | H | 6.46473500  | 2.48235400  | -0.27898100 |
| C | 4.95188700  | 0.38197000  | 3.09408900  | H | 4.74343100  | 2.75816100  | 0.04663000  |
| C | 2.77862600  | 0.80219300  | 4.07068800  | H | 3.09927000  | 2.44516000  | -1.90620200 |
| C | 3.64734000  | 0.87627800  | 2.97368400  | H | 1.68238500  | 2.14088300  | -4.10859200 |
| O | 3.17272100  | 1.43881000  | 1.82899700  | H | 2.14565800  | 3.79309000  | -3.67909300 |
| H | 4.29287600  | -1.48972600 | 7.15475200  | H | 2.47802400  | 3.16834500  | -5.32853100 |
| H | 5.96220600  | -1.25100200 | 6.65226900  | C | -1.19332700 | 3.21144800  | 0.74257000  |
| H | 6.40796500  | -0.50732100 | 4.40524700  | C | -0.35733400 | 2.12895400  | 0.51916600  |
| H | 2.52735900  | 0.19449100  | 6.10661400  | C | -1.51057300 | 0.74064300  | 2.14952500  |
| H | 5.63291700  | 0.44769400  | 2.24959600  | C | -2.36102000 | 1.82946200  | 2.38615000  |
| H | 1.76517900  | 1.17504400  | 3.95877200  | C | -2.20643500 | 3.03856300  | 1.69685400  |
| H | 3.69051500  | 1.12009200  | 1.05471800  | H | -1.06163200 | 4.14658000  | 0.20523200  |

H -1.63615700 -0.20954200 2.65843300  
H -3.15698000 1.73628600 3.11921700

H -2.88384300 3.85973400 1.90499500

**SkDHPase.PTA-TS1-II**

C -2.73099300 -0.10103300 -4.80017800  
C -3.63548100 -0.17636100 -5.98023900  
N -3.77399000 0.82566500 -6.93086700  
C -4.46165600 -1.17624800 -6.40875200  
C -4.65349400 0.40490700 -7.87481100  
N -5.08305800 -0.81248600 -7.58972900  
C -9.56333600 -3.95541400 -4.12770500  
C -9.02872300 -3.24539100 -5.33344600  
N -9.66624000 -2.14800700 -5.89383600  
C -7.91782000 -3.43393800 -6.11753600  
C -8.95056000 -1.72088600 -6.95979400  
N -7.88350000 -2.48517100 -7.12174000  
C -6.95819100 2.60919700 -10.69330300  
N -7.27629800 1.56001500 -9.75026400  
C -7.17265800 0.24542000 -10.12885700  
O -6.58077000 0.07058300 -11.25156300  
O -7.61912900 -0.64088600 -9.34612900  
C -5.99742600 1.45357700 -14.50229100  
C -6.33757600 0.07867200 -14.99369100  
N -6.30090000 -1.07581400 -14.20803200  
C -6.72711000 -0.26671100 -16.26159700  
C -6.65325800 -2.08002400 -15.00222000  
N -6.91595200 -1.63396100 -16.24872900  
C -0.67059100 -2.26303000 -10.70606900  
C -1.87042600 -1.90483800 -11.50943600  
N -1.86981900 -1.28929800 -12.75405700  
C -3.18794600 -2.10444300 -11.21997100  
C -3.15599500 -1.14836800 -13.16308100  
N -3.97925000 -1.63686700 -12.24815600  
C -2.92951000 -4.25382300 -7.22607100  
C -4.15872900 -4.09697000 -8.12647900  
O -5.23491000 -3.67026600 -7.57114900  
O -4.02923800 -4.32695800 -9.35104700  
Zn -6.39289900 -2.18234300 -8.49750500  
Zn -6.01350300 -1.57638600 -12.09137300  
H -1.67931600 0.00939600 -5.09333800  
H -2.97971200 0.73805600 -4.13822400  
H -4.63797300 -2.14719400 -5.97707300  
H -3.30498500 1.72093900 -6.92331700  
H -4.96352600 1.00457800 -8.71695100  
H -9.77684100 -5.00609900 -4.34793300  
H -10.49406800 -3.49644600 -3.77981400  
H -7.13437800 -4.17193100 -6.03998200  
H -10.52975300 -1.74069200 -5.56232000  
H -9.21198300 -0.88609500 -7.58992300  
H -6.60709800 1.72150500 -13.63388000  
H -6.88714900 0.33018800 -17.14618900

H -7.25812600 -2.20207700 -17.01118100  
H -6.70391500 -3.12095400 -14.72046600  
H -0.99178200 -2.84517900 -9.83908900  
H 0.03946900 -2.87773500 -11.27303300  
H -3.59292000 -2.61145600 -10.36136300  
H -1.05434500 -1.00304200 -13.27850500  
H -3.44782900 -0.70899600 -14.10473100  
H -5.93858400 2.48628900 -11.06399700  
H -2.20191900 -4.92901700 -7.68170100  
H -2.46386900 -3.26839500 -7.09936700  
H -8.84923200 -3.92679200 -3.29748100  
H -4.94737600 1.52680300 -14.19177400  
H -6.16742900 2.19021800 -15.29218900  
H -7.03154400 3.57571900 -10.18547600  
H -7.63431000 2.62114100 -11.55850200  
H -2.81713600 -1.02031100 -4.21567300  
H -3.20843500 -4.61808700 -6.23292200  
H -0.12808700 -1.37972500 -10.34499500  
H -7.91319900 1.75191400 -8.99066100  
C -15.72463300 -5.23248500 -8.59993500  
C -14.28159700 -5.20646000 -8.07991900  
C -14.20250500 -4.78461800 -6.59354700  
C -12.82588600 -5.06664800 -5.97714300  
C -14.58784300 -3.31138300 -6.38409300  
C -8.21562000 -7.89747300 -4.42193200  
C -8.82689300 -9.10290100 -5.13684400  
S -10.15012300 -8.56222400 -6.31371900  
C -9.38678200 -9.69131200 -11.58260700  
C -9.01944800 -9.96729300 -10.12339500  
O -9.81897700 -10.47304700 -9.33249400  
C -10.75274400 -9.00978100 -11.70996400  
C -11.13564900 -8.73860500 -13.16034400  
O -10.32662300 -8.37591400 -14.01682900  
N -12.45325700 -8.88007600 -13.45164300  
N -7.73294800 -9.66288800 -9.80597500  
C -7.14861500 -9.92147500 -8.50393700  
H -13.84236900 -6.20720500 -8.18916200  
H -13.67031500 -4.52834300 -8.69351300  
H -14.93321500 -5.40108600 -6.04826000  
H -12.53410400 -6.11682800 -6.09454700  
H -12.82662700 -4.84321700 -4.90278100  
H -12.04707400 -4.44595600 -6.44070700  
H -14.55329600 -3.04291200 -5.32120400  
H -13.89432500 -2.64733500 -6.91993900  
H -15.59783000 -3.09118600 -6.74344500  
H -16.18695800 -4.23997800 -8.58185900  
H -8.05974400 -9.63713700 -5.70255900

|   |              |              |              |   |              |              |              |
|---|--------------|--------------|--------------|---|--------------|--------------|--------------|
| H | -9.26166400  | -9.79972400  | -4.41489300  | C | -4.81183900  | -9.56725400  | -11.86294900 |
| H | -10.06457800 | -9.58488900  | -7.19656300  | C | -4.64523200  | -9.02643000  | -13.26880700 |
| H | -7.74029800  | -7.21483900  | -5.13422000  | O | -4.02882400  | -9.62116900  | -14.14709800 |
| H | -10.72875100 | -8.03462300  | -11.20356100 | N | -5.24612800  | -7.81141200  | -13.45411700 |
| H | -11.51172400 | -9.61076000  | -11.19952600 | C | -5.53339500  | -7.30086300  | -14.78114200 |
| H | -13.12466100 | -9.20728300  | -12.77398900 | C | -4.93664300  | -5.89299300  | -14.89562200 |
| H | -12.76709800 | -8.68791300  | -14.39311400 | O | -5.44453800  | -4.95190600  | -14.24130200 |
| H | -8.62039500  | -9.10204400  | -12.09375700 | C | -7.05529300  | -7.26121900  | -15.04141500 |
| H | -7.67041400  | -10.76670200 | -8.05097500  | O | -7.57217400  | -8.54640100  | -14.78114700 |
| H | -7.23072000  | -9.05557900  | -7.83424000  | N | -3.87557300  | -5.66317200  | -15.68884000 |
| H | -7.24747700  | -9.00641000  | -10.40511900 | C | -3.04381100  | -6.64322800  | -16.44044800 |
| H | -9.41774900  | -10.66553400 | -12.08784300 | C | -2.04510400  | -7.36252000  | -15.52347800 |
| H | -6.09071600  | -10.17405100 | -8.62246100  | C | -2.37450400  | -5.73439100  | -17.48798400 |
| H | -8.97641300  | -7.33897000  | -3.86433400  | C | -2.11770000  | -4.42485100  | -16.72337200 |
| H | -7.45798800  | -8.23148400  | -3.70353800  | C | -3.34368200  | -4.29043300  | -15.80435500 |
| H | -16.34563400 | -5.90145500  | -7.99233300  | H | -3.10848200  | -3.88993500  | -14.81345100 |
| H | -15.76748100 | -5.59073600  | -9.63497200  | H | -4.11744900  | -3.64457700  | -16.23660500 |
| C | -12.65108500 | -2.36154900  | -18.57849700 | H | -1.20094000  | -4.50560100  | -16.12976900 |
| C | -13.33098900 | -2.76983800  | -17.26181500 | H | -2.00448600  | -3.56167900  | -17.38590600 |
| C | -12.30797300 | -3.27187700  | -16.27137800 | H | -1.46360100  | -6.18067000  | -17.89617900 |
| C | -11.54529000 | -2.36952700  | -15.52161400 | H | -3.06494200  | -5.55689400  | -18.32132200 |
| C | -12.00590800 | -4.63631200  | -16.16323600 | H | -3.69246100  | -7.37875900  | -16.92256300 |
| C | -10.49130800 | -2.80327800  | -14.72094500 | H | -1.43809500  | -6.64716700  | -14.95732600 |
| C | -10.96048500 | -5.09380700  | -15.36513900 | H | -2.55953500  | -8.03025400  | -14.82923300 |
| C | -10.18618500 | -4.16802800  | -14.65945400 | H | -1.37059700  | -7.97817600  | -16.12986100 |
| O | -9.13180000  | -4.63405500  | -13.92728600 | H | -5.07131400  | -8.00033100  | -15.47809400 |
| H | -14.08004200 | -3.54613500  | -17.46116000 | H | -8.51881300  | -8.46342400  | -14.55314100 |
| H | -13.87285900 | -1.90914400  | -16.84880800 | H | -7.21637700  | -6.95570600  | -16.09121300 |
| H | -11.76980100 | -1.30573800  | -15.57446000 | H | -7.52158300  | -6.49429400  | -14.41170600 |
| H | -12.59394300 | -5.35605100  | -16.72960800 | H | -5.84134600  | -7.49730200  | -12.69269600 |
| H | -9.90600600  | -2.09221600  | -14.14138000 | H | -4.00098400  | -10.26860200 | -11.65410500 |
| H | -10.73078900 | -6.15184200  | -15.27643500 | H | -4.81816700  | -8.77193500  | -11.11372300 |
| H | -8.66793300  | -3.87484900  | -13.52576000 | H | -5.75777100  | -10.11662800 | -11.79867700 |
| H | -11.91929900 | -1.56347900  | -18.40796200 | C | -9.13849400  | -6.13513300  | -9.19962300  |
| H | -12.11920200 | -3.21151600  | -19.02075500 | C | -8.52062700  | -4.15723900  | -10.47082700 |
| H | -13.38147000 | -1.99923500  | -19.31197200 | C | -9.57688100  | -3.42271200  | -9.96067500  |
| N | -6.80496400  | -4.97614100  | -11.76381900 | C | -10.42750000 | -4.07110100  | -9.05457000  |
| C | -7.22130300  | -6.02430400  | -10.96627400 | C | -10.20386300 | -5.39698000  | -8.66747500  |
| O | -6.78356900  | -7.16717600  | -11.03561800 | H | -8.97990700  | -7.16794300  | -8.90837400  |
| C | -7.51338400  | -3.81094100  | -11.50772300 | H | -9.72959100  | -2.38913700  | -10.25134600 |
| O | -7.59906300  | -2.88493500  | -12.36449200 | H | -11.27883600 | -3.53543600  | -8.64501800  |
| H | -6.19807100  | -5.06793400  | -12.59465000 | H | -10.86619500 | -5.87204400  | -7.95281900  |
| O | -6.08479900  | -2.82423700  | -10.35278900 | C | -8.31864300  | -5.49480000  | -10.11579800 |
| H | -5.38448100  | -3.50926600  | -10.19063600 |   |              |              |              |

### **SkDHPase.PTA-INT1-II**

|   |             |            |             |   |            |            |             |
|---|-------------|------------|-------------|---|------------|------------|-------------|
| C | 1.14314300  | 8.50765300 | -1.80309900 | N | 0.39067900 | 5.28156000 | -0.12409600 |
| C | 0.67622900  | 7.32953000 | -1.02214800 | C | 6.60589600 | 3.09278000 | -0.12182600 |
| N | -0.45272000 | 7.30689200 | -0.21300900 | C | 5.19333400 | 3.17101500 | 0.34280200  |
| C | 1.18206600  | 6.06402500 | -0.94430100 | N | 4.84154200 | 3.27118900 | 1.68192300  |
| C | -0.58538100 | 6.06076900 | 0.30819400  | C | 4.00129800 | 3.16940600 | -0.33045600 |

|    |             |             |             |   |             |             |             |
|----|-------------|-------------|-------------|---|-------------|-------------|-------------|
| C  | 3.49354300  | 3.32183000  | 1.77528900  | H | -2.05876200 | 4.08991400  | 5.08421200  |
| N  | 2.95610700  | 3.26091200  | 0.56898600  | H | 2.05069500  | 8.24341100  | -2.35126600 |
| C  | -1.70664700 | 4.89290000  | 4.42231300  | H | 1.48616600  | 4.43510500  | -4.32162900 |
| N  | -0.53913900 | 4.51273000  | 3.65853300  | H | -4.36208600 | 5.67508600  | -2.99675600 |
| C  | -0.60258800 | 3.61521200  | 2.63316700  | H | 0.38004700  | 4.68925800  | 4.03555700  |
| O  | -1.78322300 | 3.29843300  | 2.24502700  | C | 7.01830400  | -3.26581500 | 4.23609400  |
| O  | 0.49491400  | 3.22156400  | 2.13006700  | C | 6.58497100  | -2.26263200 | 3.15947200  |
| C  | -4.90592500 | 2.38130100  | 3.94964100  | C | 7.57699100  | -1.08699100 | 3.00928800  |
| C  | -4.72787900 | 0.98511600  | 3.44169100  | C | 7.33247300  | -0.28611700 | 1.72331000  |
| N  | -3.87134400 | 0.67359800  | 2.39038700  | C | 7.56492400  | -0.15516000 | 4.23149100  |
| C  | -5.32238400 | -0.17210000 | 3.87067200  | C | 6.64098600  | 0.94679100  | -3.70458900 |
| C  | -3.95549700 | -0.63893800 | 2.19331700  | C | 6.74668900  | -0.56016700 | -3.94282800 |
| N  | -4.82755100 | -1.18061600 | 3.06534000  | S | 6.39491400  | -1.49111500 | -2.38236500 |
| C  | -4.04797500 | 4.63881000  | -3.17547100 | C | 2.23408300  | -4.98959800 | -2.40361700 |
| C  | -4.08245000 | 3.81505200  | -1.93366200 | C | 3.22922100  | -4.13818200 | -3.19655300 |
| N  | -5.23193000 | 3.47239700  | -1.23472000 | O | 4.43490200  | -4.39773200 | -3.22792400 |
| C  | -3.06362100 | 3.23228100  | -1.23412800 | C | 2.74390500  | -5.31733300 | -0.99573700 |
| C  | -4.87811200 | 2.71135400  | -0.17024200 | C | 1.74484300  | -6.14799000 | -0.19842600 |
| N  | -3.56415400 | 2.55130000  | -0.14290600 | O | 0.53340600  | -5.92259100 | -0.19022200 |
| C  | 0.47080300  | 4.25551600  | -3.95654800 | N | 2.28000200  | -7.14429900 | 0.55315300  |
| C  | 0.47521100  | 3.27422500  | -2.79180800 | N | 2.65404600  | -3.12679500 | -3.90118800 |
| O  | 1.41120000  | 3.38697500  | -1.92660000 | C | 3.39768700  | -2.24843500 | -4.78609400 |
| O  | -0.47504100 | 2.45340600  | -2.70611500 | H | 6.50712100  | -2.78613800 | 2.19694800  |
| Zn | 0.98492400  | 3.30248200  | 0.12347300  | H | 5.58081700  | -1.87550900 | 3.38666100  |
| Zn | -2.44257100 | 1.70044800  | 1.31640500  | H | 8.58409400  | -1.52430100 | 2.93306300  |
| H  | 0.39633500  | 8.83883800  | -2.53554200 | H | 7.36934300  | -0.92185200 | 0.83129100  |
| H  | 1.38025900  | 9.36538800  | -1.16130200 | H | 8.09493500  | 0.49478900  | 1.60447600  |
| H  | 2.03594400  | 5.64630100  | -1.45091500 | H | 6.34968900  | 0.20460300  | 1.74075100  |
| H  | -1.07331400 | 8.08528700  | -0.03767100 | H | 8.29989200  | 0.65138000  | 4.11953000  |
| H  | -1.38454500 | 5.76133600  | 0.96971700  | H | 6.57552600  | 0.30766200  | 4.35815000  |
| H  | 6.63172100  | 3.02608400  | -1.21202600 | H | 7.80090900  | -0.68567900 | 5.15935300  |
| H  | 7.11622000  | 2.20912500  | 0.27668300  | H | 7.04818300  | -2.81309600 | 5.23297000  |
| H  | 3.80965800  | 3.10346600  | -1.39004900 | H | 6.02602700  | -0.87409900 | -4.70196300 |
| H  | 5.48647100  | 3.28075600  | 2.46028400  | H | 7.74734500  | -0.82422800 | -4.29649400 |
| H  | 2.93854900  | 3.38373300  | 2.69759200  | H | 5.95948900  | -2.64690100 | -2.93694700 |
| H  | -3.94103200 | 2.83138400  | 4.20264400  | H | 5.62893200  | 1.22524700  | -3.39176700 |
| H  | -6.03346400 | -0.36157800 | 4.65968300  | H | 2.89080300  | -4.38628000 | -0.43202700 |
| H  | -5.00545500 | -2.17087600 | 3.16459400  | H | 3.71996000  | -5.80817700 | -1.05941100 |
| H  | -3.41352400 | -1.20045600 | 1.44485200  | H | 3.26226300  | -7.37119700 | 0.52942700  |
| H  | -3.02675100 | 4.65271300  | -3.56367400 | H | 1.66125900  | -7.71817600 | 1.10963400  |
| H  | -4.69393400 | 4.22662200  | -3.96010800 | H | 1.25273100  | -4.51335100 | -2.34193900 |
| H  | -2.01913200 | 3.21461700  | -1.49468200 | H | 4.26403000  | -2.79272800 | -5.16724900 |
| H  | -6.17826600 | 3.72614000  | -1.48405900 | H | 3.74751500  | -1.34445400 | -4.27094200 |
| H  | -5.57975300 | 2.29653900  | 0.53764900  | H | 1.74858900  | -2.80592900 | -3.57550300 |
| H  | -2.52236700 | 5.16176200  | 3.74849400  | H | 2.10075400  | -5.92207100 | -2.96812800 |
| H  | -0.16109800 | 3.89136200  | -4.76897200 | H | 2.76101600  | -1.95320900 | -5.62572300 |
| H  | 0.07684200  | 5.21527700  | -3.59945100 | H | 7.34355200  | 1.27427700  | -2.92942800 |
| H  | 7.18280100  | 3.97836900  | 0.17331400  | H | 6.88294200  | 1.49111900  | -4.62492300 |
| H  | -5.37795700 | 3.02888000  | 3.19973900  | H | 8.01731100  | -3.66268200 | 4.01956800  |
| H  | -5.53771300 | 2.38842000  | 4.84212500  | H | 6.32815000  | -4.11572800 | 4.28651000  |
| H  | -1.46019300 | 5.76161800  | 5.03930800  | C | -3.23554400 | -5.66671900 | 6.75695600  |

|   |             |             |             |   |             |             |             |
|---|-------------|-------------|-------------|---|-------------|-------------|-------------|
| C | -1.79140600 | -5.15472600 | 6.60955500  | N | -5.18198900 | -1.98883600 | -2.14587000 |
| C | -1.55468500 | -4.41659900 | 5.30866700  | C | -5.97643700 | -2.69485100 | -3.18671600 |
| C | -1.63947600 | -3.02219600 | 5.23388200  | C | -5.64814600 | -2.18218000 | -4.59500700 |
| C | -1.27546400 | -5.11290800 | 4.12159300  | C | -7.41578900 | -2.38457800 | -2.73535600 |
| C | -1.47298000 | -2.34183400 | 4.02491100  | C | -7.32696700 | -0.94628700 | -2.19780800 |
| C | -1.10450100 | -4.45671000 | 2.90679900  | C | -5.94551500 | -0.89196200 | -1.52304100 |
| C | -1.21368600 | -3.05957800 | 2.84949100  | H | -5.42620100 | 0.06120800  | -1.66502900 |
| O | -1.07416200 | -2.46473200 | 1.63392800  | H | -6.00410000 | -1.06696500 | -0.44139600 |
| H | -1.10282900 | -6.00674200 | 6.68169600  | H | -7.37774000 | -0.22954200 | -3.02452800 |
| H | -1.55524100 | -4.49612500 | 7.45513600  | H | -8.13542800 | -0.70229600 | -1.50197100 |
| H | -1.83415700 | -2.44984000 | 6.13937800  | H | -8.13535300 | -2.49578300 | -3.55119900 |
| H | -1.18574600 | -6.19734100 | 4.15130500  | H | -7.70914800 | -3.07086500 | -1.93182100 |
| H | -1.52379100 | -1.25571000 | 3.99249800  | H | -5.77821300 | -3.76822800 | -3.13405700 |
| H | -0.86620600 | -5.00270200 | 1.99811900  | H | -5.75542700 | -1.09299500 | -4.65574100 |
| H | -1.11989800 | -1.48050500 | 1.69471400  | H | -4.63565000 | -2.46530500 | -4.88968600 |
| H | -3.95013500 | -4.83539300 | 6.73080000  | H | -6.33695400 | -2.63317000 | -5.31920700 |
| H | -3.49426600 | -6.35266700 | 5.94223000  | H | -3.71230400 | -3.98556600 | -3.01082800 |
| H | -3.37128200 | -6.20036500 | 7.70484500  | H | -0.93800800 | -5.40318800 | -1.25907200 |
| N | -0.57723700 | -0.48967800 | -0.90601500 | H | -3.27027700 | -4.57581900 | -0.64310100 |
| C | 0.49793900  | -1.21014300 | -1.32483700 | H | -1.85711200 | -3.51067400 | -0.61821400 |
| O | 0.50090300  | -2.02157800 | -2.25698700 | H | -1.19200000 | -2.50395300 | -2.84876700 |
| C | -0.29124500 | 0.35447300  | 0.25379200  | H | -0.78441800 | -2.74505700 | -6.31207500 |
| O | -1.18825700 | 0.24778700  | 1.24820600  | H | -0.21746000 | -1.92228400 | -4.82706100 |
| H | -1.54609200 | -0.76948900 | -1.10297100 | H | 0.07006900  | -3.65946100 | -5.05999900 |
| O | -0.32378400 | 1.75442100  | -0.24125200 | C | 2.92112400  | -1.38564300 | -0.38696800 |
| H | -0.39002400 | 1.78818900  | -1.26411100 | C | 1.14143400  | -0.04476400 | 0.58870000  |
| C | -0.64129000 | -2.84435000 | -5.23381500 | C | 1.91827800  | 0.26739900  | 1.69352600  |
| C | -1.97170100 | -3.19276400 | -4.59039600 | C | 3.21535100  | -0.26038900 | 1.74676400  |
| O | -2.87235900 | -3.76221400 | -5.20165100 | C | 3.71982300  | -1.05594700 | 0.71159800  |
| N | -2.06389800 | -2.80565500 | -3.28381300 | H | 3.30072300  | -2.01102400 | -1.18742500 |
| C | -3.08785800 | -3.33244500 | -2.40064400 | H | 1.52543300  | 0.88995800  | 2.49004300  |
| C | -3.88828200 | -2.16415700 | -1.80689300 | H | 3.84176500  | -0.05324000 | 2.61059700  |
| O | -3.34381600 | -1.38381800 | -0.99572800 | H | 4.73468000  | -1.43369400 | 0.76631500  |
| C | -2.45379500 | -4.16507800 | -1.26503600 | C | 1.62546800  | -0.88540200 | -0.41254000 |
| O | -1.68163600 | -5.18593700 | -1.85367200 |   |             |             |             |

### **SkDHPase.PTA-TS2-II**

|   |             |            |             |   |             |             |             |
|---|-------------|------------|-------------|---|-------------|-------------|-------------|
| C | 1.14735700  | 8.28655300 | -2.12791800 | C | -0.31856100 | 3.51663000  | 2.73667500  |
| C | 0.80704900  | 7.14333700 | -1.23911300 | O | -1.44106500 | 2.91711700  | 2.65759500  |
| N | -0.01047500 | 7.24160800 | -0.12264700 | O | 0.77527400  | 3.21500500  | 2.17375000  |
| C | 1.16223800  | 5.82491600 | -1.29291800 | C | -4.72660700 | 2.46168400  | 4.09983300  |
| C | -0.11829100 | 6.01546300 | 0.44503100  | C | -4.55037600 | 1.06735300  | 3.57358100  |
| N | 0.57780000  | 5.13097500 | -0.25008500 | N | -3.70965500 | 0.74071500  | 2.51098800  |
| C | 6.59474400  | 2.83566700 | -0.51452800 | C | -5.15860500 | -0.08034400 | 4.01251500  |
| C | 5.20456500  | 2.92441400 | 0.00473900  | C | -3.82397800 | -0.56780100 | 2.32104000  |
| N | 4.91594300  | 3.03647800 | 1.35623400  | N | -4.69317300 | -1.09914300 | 3.20470000  |
| C | 3.98307700  | 2.92446900 | -0.61414900 | C | -4.16276200 | 4.46578900  | -3.12964400 |
| C | 3.57515400  | 3.09792200 | 1.51117000  | C | -4.06419900 | 3.78018200  | -1.80909800 |
| N | 2.98135800  | 3.03042300 | 0.33110700  | N | -5.10059800 | 3.73381300  | -0.88662300 |
| C | -1.46919300 | 4.93116500 | 4.34035100  | C | -3.03613600 | 3.09966800  | -1.21244600 |
| N | -0.32529800 | 4.65705800 | 3.50711200  | C | -4.67693500 | 3.04718800  | 0.20234100  |

|    |             |             |             |   |             |             |             |
|----|-------------|-------------|-------------|---|-------------|-------------|-------------|
| N  | -3.42611200 | 2.65465800  | 0.03605500  | O | 0.21575900  | -5.00229500 | -1.67362200 |
| C  | 0.30841100  | 3.97763000  | -4.10261400 | N | 1.09635700  | -4.35343400 | 0.32108100  |
| C  | 0.41751700  | 2.89003600  | -3.02914000 | N | 2.78393900  | -3.92597100 | -4.32495700 |
| O  | 1.28787000  | 2.99836600  | -2.13198500 | C | 3.08958500  | -2.60055200 | -4.84321800 |
| O  | -0.44610300 | 1.94182300  | -3.11879300 | H | 6.68201300  | -2.91497600 | 1.97106900  |
| Zn | 0.98363600  | 3.13560300  | 0.06634000  | H | 5.58025800  | -2.16719700 | 3.11905400  |
| Zn | -2.19073700 | 1.65472100  | 1.34338700  | H | 6.95994200  | -0.52174000 | 2.00348100  |
| H  | 0.25678900  | 8.72352200  | -2.59688000 | H | 6.26334400  | -0.04165500 | 4.36894100  |
| H  | 1.66506800  | 9.08953000  | -1.58853000 | H | 7.79340900  | 0.75802700  | 3.95109000  |
| H  | 1.78732600  | 5.31684100  | -2.00785600 | H | 7.80063800  | -0.69277800 | 4.95379500  |
| H  | -0.44523000 | 8.08683100  | 0.22145900  | H | 9.40871700  | -0.34872200 | 2.27414300  |
| H  | -0.66088300 | 5.81767500  | 1.35772000  | H | 9.44741400  | -1.82949200 | 3.23502500  |
| H  | 6.58578400  | 2.83291000  | -1.60734800 | H | 8.98260500  | -1.89523900 | 1.52517900  |
| H  | 7.09600500  | 1.91619800  | -0.18746100 | H | 7.04020200  | -2.93837000 | 5.03408400  |
| H  | 3.74687900  | 2.85318300  | -1.66428600 | H | 5.33774700  | 0.42695400  | -2.14533400 |
| H  | 5.59530500  | 3.04636000  | 2.10465900  | H | 4.85356600  | -0.76188700 | -3.34885500 |
| H  | 3.06107800  | 3.18133400  | 2.45482400  | H | 5.94828500  | -2.52449400 | -2.22687400 |
| H  | -3.75448900 | 2.93854500  | 4.25600600  | H | 7.31816500  | 1.07758100  | -3.62408000 |
| H  | -5.86363200 | -0.25502300 | 4.81054000  | H | 3.29805700  | -5.28026900 | -0.61625500 |
| H  | -4.88855200 | -2.08554300 | 3.30725300  | H | 2.33647000  | -6.75021600 | -0.82169200 |
| H  | -3.29190600 | -1.13311000 | 1.57022000  | H | 1.91568100  | -4.27422300 | 0.90484700  |
| H  | -3.24517400 | 4.29272400  | -3.69743100 | H | 0.27859400  | -3.80712200 | 0.59054300  |
| H  | -4.99854700 | 4.08547400  | -3.72965000 | H | 1.92068700  | -6.06270000 | -3.23260400 |
| H  | -2.05919300 | 2.86618900  | -1.60446100 | H | 4.17083100  | -2.44414100 | -4.83466000 |
| H  | -6.02210200 | 4.13104400  | -1.00905800 | H | 2.60223700  | -1.82410600 | -4.24451600 |
| H  | -5.29389500 | 2.84573900  | 1.06455600  | H | 2.02887300  | -4.44556800 | -4.74888700 |
| H  | -2.36770700 | 5.03122600  | 3.72733900  | H | 3.61054000  | -6.43448900 | -2.85123100 |
| H  | -0.24045600 | 3.61458400  | -4.97354300 | H | 2.73232500  | -2.53609400 | -5.87353500 |
| H  | -0.22260000 | 4.83756500  | -3.67835500 | H | 6.75889700  | -0.07718200 | -4.83765200 |
| H  | 7.20694700  | 3.68626600  | -0.18987300 | H | 5.76120100  | 1.33765200  | -4.43364900 |
| H  | -5.29618500 | 3.09590900  | 3.40780300  | H | 8.14251500  | -3.70049000 | 3.87831100  |
| H  | -5.26752800 | 2.44481200  | 5.05008400  | H | 6.48360200  | -4.28238800 | 4.03364900  |
| H  | -1.30623100 | 5.87516800  | 4.86983700  | C | -3.05711400 | -5.51662700 | 7.10002300  |
| H  | -1.65382900 | 4.14488400  | 5.08423300  | C | -1.69727500 | -4.86769700 | 6.78185400  |
| H  | 1.80960700  | 7.94609100  | -2.92776000 | C | -1.58298200 | -4.24326200 | 5.40155200  |
| H  | 1.30553100  | 4.31265100  | -4.40009800 | C | -1.33842200 | -2.87461600 | 5.23640700  |
| H  | -4.29655700 | 5.54983000  | -3.02307300 | C | -1.67207700 | -5.02516800 | 4.23738600  |
| H  | 0.58471500  | 4.98010000  | 3.80480100  | C | -1.16011700 | -2.30079600 | 3.97289000  |
| C  | 7.10643200  | -3.38088000 | 4.03379100  | C | -1.50920600 | -4.47423000 | 2.96924000  |
| C  | 6.63979400  | -2.40652400 | 2.94441000  | C | -1.23329000 | -3.10554900 | 2.83097300  |
| C  | 7.42795900  | -1.08144400 | 2.82889600  | O | -1.02525900 | -2.63118400 | 1.56403900  |
| C  | 7.31222300  | -0.21780000 | 4.09518500  | H | -0.91381900 | -5.63018400 | 6.89513700  |
| C  | 8.89846900  | -1.30442600 | 2.44456100  | H | -1.48101600 | -4.10160000 | 7.53688700  |
| C  | 6.42998400  | 0.57149100  | -4.02012300 | H | -1.26211800 | -2.23795000 | 6.11574400  |
| C  | 5.71284400  | -0.23067900 | -2.93568900 | H | -1.86215700 | -6.09300900 | 4.32224200  |
| S  | 6.82411200  | -1.49809800 | -2.16431700 | H | -0.94202300 | -1.24056300 | 3.87229800  |
| C  | 2.79395300  | -5.72575100 | -2.66704500 | H | -1.58681800 | -5.08858400 | 2.07583600  |
| C  | 3.26886100  | -4.35401600 | -3.13738200 | H | -1.02627900 | -1.63183600 | 1.48767300  |
| O  | 4.07626700  | -3.68975800 | -2.47621100 | H | -3.86708900 | -4.77914800 | 7.05571600  |
| C  | 2.46297200  | -5.71778400 | -1.17160500 | H | -3.29640600 | -6.31618100 | 6.38992300  |
| C  | 1.15812900  | -4.97919100 | -0.87276700 | H | -3.05060300 | -5.95365800 | 8.10457800  |

|   |             |             |             |   |             |             |             |
|---|-------------|-------------|-------------|---|-------------|-------------|-------------|
| N | -0.45669200 | -0.07418600 | -1.34304400 | H | -7.90693200 | 0.20126400  | -1.51824300 |
| C | 0.61610100  | -0.98349700 | -1.63372200 | H | -8.33648900 | -2.01734900 | -3.03350300 |
| O | 0.61330600  | -1.74827900 | -2.58264600 | H | -7.85605000 | -2.23664300 | -1.34392400 |
| C | -0.28396700 | 0.48762400  | 0.11237400  | H | -6.15226900 | -3.50276600 | -2.39851800 |
| O | -1.21988300 | -0.03062100 | 0.95481900  | H | -5.95967700 | -1.35917400 | -4.59848700 |
| H | -1.39775900 | -0.49717900 | -1.45954900 | H | -4.98620700 | -2.84907200 | -4.51515300 |
| O | -0.44726300 | 1.85156800  | 0.02992200  | H | -6.72749000 | -2.94651900 | -4.78092200 |
| H | -0.39864800 | 0.99860200  | -2.22653900 | H | -4.06731700 | -3.90915400 | -2.66802800 |
| C | -0.98208900 | -3.16798200 | -5.08966500 | H | -1.58677500 | -5.21726600 | -1.28455900 |
| C | -2.24409300 | -3.50047000 | -4.32352700 | H | -3.91696400 | -4.05153000 | -0.19616300 |
| O | -3.23280800 | -3.98442600 | -4.86988600 | H | -2.29942600 | -3.34040400 | -0.23753600 |
| N | -2.20019800 | -3.16737500 | -3.00116400 | H | -1.32890100 | -2.80185800 | -2.63358400 |
| C | -3.35263400 | -3.28825800 | -2.13046700 | H | -1.00006400 | -2.11159100 | -5.38262000 |
| C | -3.91070600 | -1.89552900 | -1.80559800 | H | -0.08630800 | -3.32655700 | -4.48448300 |
| O | -3.16329500 | -1.03273700 | -1.30411600 | H | -0.95162200 | -3.77764400 | -5.99525300 |
| C | -2.99635600 | -3.98064400 | -0.79158600 | C | 2.88135400  | -1.44025700 | -0.48627700 |
| O | -2.50749200 | -5.28595600 | -0.95451400 | C | 1.63198100  | -0.82095900 | -0.58236800 |
| N | -5.22257500 | -1.64176800 | -1.98601300 | C | 1.12254300  | -0.01313400 | 0.43367200  |
| C | -6.20483900 | -2.46435100 | -2.73845600 | C | 1.84338200  | 0.16631700  | 1.61159200  |
| C | -5.94287800 | -2.39733300 | -4.24594400 | C | 3.09330200  | -0.44844300 | 1.72042000  |
| C | -7.53943000 | -1.82492000 | -2.30998500 | C | 3.61662200  | -1.23166000 | 0.67895500  |
| C | -7.20113600 | -0.33187000 | -2.16256000 | H | 3.25658700  | -2.07741700 | -1.28112100 |
| C | -5.77604000 | -0.33549800 | -1.58561900 | H | 1.44372700  | 0.77822600  | 2.41272100  |
| H | -5.14479300 | 0.47439100  | -1.96286500 | H | 3.67198400  | -0.32592900 | 2.63302500  |
| H | -5.77127600 | -0.26353300 | -0.49019600 | H | 4.59487300  | -1.69065000 | 0.78583400  |
| H | -7.21448900 | 0.15883900  | -3.14190300 |   |             |             |             |

### ***S*kDHPase.PTA-EP-II**

|   |             |             |             |    |             |            |             |
|---|-------------|-------------|-------------|----|-------------|------------|-------------|
| C | 1.73123500  | 8.28910700  | -2.29181700 | C  | -3.77668000 | 4.76859000 | -3.32519700 |
| C | 1.30325300  | 7.18480100  | -1.38942300 | C  | -3.83922600 | 4.04816500 | -2.02050500 |
| N | 0.47326400  | 7.35083300  | -0.28987700 | N  | -4.93640200 | 4.07083700 | -1.16946000 |
| C | 1.57059600  | 5.84519100  | -1.42017000 | C  | -2.91288300 | 3.26910700 | -1.38072000 |
| C | 0.27393000  | 6.14081700  | 0.28889000  | C  | -4.65095400 | 3.32994400 | -0.07451500 |
| N | 0.92146400  | 5.20186100  | -0.38126200 | N  | -3.42496100 | 2.83457800 | -0.17209700 |
| C | 6.81061700  | 2.56185200  | -0.45126900 | C  | 0.67571100  | 3.99504100 | -4.19363800 |
| C | 5.39917400  | 2.65292800  | 0.02683400  | C  | 0.54057300  | 3.04000800 | -3.01792100 |
| N | 5.05754800  | 2.62840700  | 1.37235000  | O  | 1.49788200  | 3.04770400 | -2.15294300 |
| C | 4.20258800  | 2.77802100  | -0.62990700 | O  | -0.49334300 | 2.35103200 | -2.94322200 |
| C | 3.71448100  | 2.73751400  | 1.48499600  | Zn | 1.20781200  | 3.14275000 | -0.15490400 |
| N | 3.16614800  | 2.82994800  | 0.28565600  | Zn | -2.38758600 | 1.91456700 | 1.28488500  |
| C | -1.20810300 | 5.23789400  | 4.18844800  | H  | 0.87760400  | 8.77425800 | -2.78151900 |
| N | -0.13743000 | 4.76817600  | 3.33534400  | H  | 2.29286100  | 9.06598200 | -1.75816600 |
| C | -0.28337700 | 3.67924000  | 2.51114600  | H  | 2.16709400  | 5.28636500 | -2.12120500 |
| O | -1.48422900 | 3.24345300  | 2.39140900  | H  | 0.08550200  | 8.22652100 | 0.03362700  |
| O | 0.75839100  | 3.24727700  | 1.93766600  | H  | -0.30723200 | 5.99223600 | 1.18623800  |
| C | -4.60173800 | 2.96107900  | 3.93096300  | H  | 6.84353700  | 2.69556000 | -1.53535300 |
| C | -4.67607400 | 1.54816600  | 3.43554700  | H  | 7.25415800  | 1.58473400 | -0.22401200 |
| N | -3.90869700 | 1.08535500  | 2.37037100  | H  | 4.00128600  | 2.83200700 | -1.68867300 |
| C | -5.45837400 | 0.51428400  | 3.87781700  | H  | 5.70390800  | 2.51267300 | 2.14120600  |
| C | -4.22872300 | -0.19050500 | 2.17346900  | H  | 3.17198800  | 2.75044900 | 2.41680800  |
| N | -5.16528800 | -0.56655200 | 3.06694700  | H  | -3.56328400 | 3.25391300 | 4.11112000  |



|   |             |             |             |   |             |             |             |
|---|-------------|-------------|-------------|---|-------------|-------------|-------------|
| H | -6.17772900 | 0.45367800  | 4.67964900  | H | 3.28957600  | -5.26975400 | -0.46014100 |
| H | -5.53847300 | -1.50177300 | 3.15672800  | H | 2.55322500  | -6.86265000 | -0.66100200 |
| H | -3.83704900 | -0.82971400 | 1.38801000  | H | 1.71981500  | -4.27049600 | 0.82069300  |
| H | -2.84751700 | 4.49805200  | -3.83279000 | H | 0.07508400  | -4.06398800 | 0.40290100  |
| H | -4.60931200 | 4.49807900  | -3.98584100 | H | 2.19570200  | -6.29413400 | -3.12424400 |
| H | -1.93962100 | 2.95757700  | -1.73591800 | H | 4.14985600  | -2.58543100 | -4.82480900 |
| H | -5.81339700 | 4.54265800  | -1.34424200 | H | 2.63925800  | -1.96590000 | -4.10969600 |
| H | -5.33785000 | 3.16841800  | 0.74223600  | H | 2.02951800  | -4.59429900 | -4.52962200 |
| H | -2.10376500 | 5.43111100  | 3.59382700  | H | 3.88348500  | -6.48667400 | -2.62343900 |
| H | 0.07397800  | 3.64938500  | -5.03699300 | H | 2.62778900  | -2.69703900 | -5.73455500 |
| H | 0.31057400  | 4.98449300  | -3.89103400 | H | 7.03475100  | -0.48097500 | -4.60338300 |
| H | 7.44257100  | 3.33630800  | 0.00017200  | H | 5.90294800  | 0.88516000  | -4.48010400 |
| H | -5.01844500 | 3.66907500  | 3.20291800  | H | 7.92784300  | -3.81776600 | 4.21228400  |
| H | -5.16587000 | 3.07212500  | 4.86103900  | H | 6.30767000  | -4.51249800 | 4.12933400  |
| H | -0.89669400 | 6.17225300  | 4.66382700  | C | -3.47101700 | -5.03414800 | 7.13090300  |
| H | -1.46975700 | 4.51933700  | 4.97681700  | C | -2.09820900 | -4.35862300 | 6.96628400  |
| H | 2.38030400  | 7.89087000  | -3.07551700 | C | -1.82522000 | -3.88848000 | 5.55208200  |
| H | 1.71923500  | 4.10843000  | -4.50292800 | C | -1.88076200 | -2.53547300 | 5.20227200  |
| H | -3.79314000 | 5.85811200  | -3.19572700 | C | -1.52180900 | -4.80753700 | 4.53496600  |
| H | 0.81688600  | 4.98471800  | 3.58582800  | C | -1.64555000 | -2.10344500 | 3.89355500  |
| C | 6.86042700  | -3.57244200 | 4.23514200  | C | -1.29081600 | -4.40068300 | 3.22535100  |
| C | 6.47439300  | -2.59636800 | 3.11616200  | C | -1.35153800 | -3.04033100 | 2.89741900  |
| C | 7.16398300  | -1.21298300 | 3.13993000  | O | -1.10626300 | -2.69047500 | 1.59637200  |
| C | 6.78651200  | -0.38919000 | 4.38153800  | H | -1.31660000 | -5.06531300 | 7.27576900  |
| C | 8.68913300  | -1.31446000 | 2.98688400  | H | -2.02947000 | -3.50612300 | 7.65371500  |
| C | 6.58022100  | 0.23478600  | -3.91169000 | H | -2.10096400 | -1.79511000 | 5.96924500  |
| C | 5.81509700  | -0.48283300 | -2.80066300 | H | -1.46238400 | -5.86744700 | 4.77335300  |
| S | 6.92126800  | -1.55505800 | -1.76792500 | H | -1.66941300 | -1.04471600 | 3.64952100  |
| C | 2.99351700  | -5.85471000 | -2.51909400 | H | -1.05561200 | -5.12342100 | 2.45011700  |
| C | 3.38160400  | -4.46570900 | -3.01691200 | H | -1.25286600 | -1.73192300 | 1.45753000  |
| O | 4.19109500  | -3.75868400 | -2.40434100 | H | -4.28218700 | -4.34291000 | 6.87373600  |
| C | 2.56089800  | -5.83608200 | -1.04852200 | H | -3.56215500 | -5.90925600 | 6.47782400  |
| C | 1.14631700  | -5.28057000 | -0.86837700 | H | -3.62323900 | -5.36734700 | 8.16381300  |
| O | 0.26599800  | -5.51289600 | -1.69963800 | N | -0.28096000 | -0.32979000 | -2.21259500 |
| N | 0.93055400  | -4.59840600 | 0.28256100  | C | 0.54299500  | -1.27273600 | -1.72067300 |
| N | 2.82400400  | -4.07322200 | -4.18654900 | O | 0.55936000  | -2.43200100 | -2.16534000 |
| C | 3.07332600  | -2.75109600 | -4.73862200 | C | -0.26392200 | 0.63087400  | 0.54874400  |
| H | 6.68872300  | -3.06631500 | 2.14638100  | O | -1.27295400 | 0.22119900  | 1.20847200  |
| H | 5.38553600  | -2.44285500 | 3.14585500  | H | -0.89733800 | -0.62662200 | -2.95873600 |
| H | 6.78509100  | -0.67336000 | 2.25741100  | O | -0.30267800 | 1.75216600  | -0.04141200 |
| H | 5.69749900  | -0.29232200 | 4.48624900  | H | -0.19867800 | 0.68346400  | -2.09632300 |
| H | 7.21368600  | 0.62111600  | 4.32957500  | C | -1.01930400 | -3.08154700 | -5.05872000 |
| H | 7.16468700  | -0.84775200 | 5.30237100  | C | -2.32063200 | -3.36633800 | -4.32819100 |
| H | 9.14290200  | -0.31966400 | 2.90008500  | O | -3.32511700 | -3.72179000 | -4.93998100 |
| H | 9.14973600  | -1.80742700 | 3.85097300  | N | -2.30099900 | -3.14246100 | -2.97719800 |
| H | 8.96061300  | -1.88343400 | 2.09024100  | C | -3.44670500 | -3.49043100 | -2.14204500 |
| H | 6.63202800  | -3.16952900 | 5.22850200  | C | -4.08395000 | -2.23911100 | -1.51299400 |
| H | 5.31962300  | 0.23606800  | -2.14067700 | O | -3.48176200 | -1.61858300 | -0.61900900 |
| H | 5.04370400  | -1.13722800 | -3.20946100 | C | -3.04379300 | -4.46372900 | -1.00756200 |
| H | 6.14132000  | -2.65584500 | -1.81590700 | O | -2.55288600 | -5.68141800 | -1.50020000 |
| H | 7.38558000  | 0.85908800  | -3.50737500 | N | -5.32703000 | -1.85271700 | -1.90089200 |

|   |             |             |             |   |             |             |             |
|---|-------------|-------------|-------------|---|-------------|-------------|-------------|
| C | -6.23843200 | -2.46681000 | -2.90567100 | H | -3.94475500 | -4.67916900 | -0.41626900 |
| C | -5.94092400 | -1.99989700 | -4.33563500 | H | -2.33776700 | -3.95400400 | -0.33811900 |
| C | -7.61755300 | -2.00765100 | -2.39289200 | H | -1.39162300 | -3.01542100 | -2.53465500 |
| C | -7.34869700 | -0.59363200 | -1.85406300 | H | -1.15058500 | -2.18224700 | -5.67208500 |
| C | -5.96130700 | -0.71974600 | -1.20577600 | H | -0.17272500 | -2.93938100 | -4.38328700 |
| H | -5.34801800 | 0.18294100  | -1.29944000 | H | -0.82534400 | -3.91071200 | -5.74590700 |
| H | -6.03346300 | -0.94743600 | -0.13416100 | C | 2.65056800  | -1.61842000 | -0.45090700 |
| H | -7.32390400 | 0.12847600  | -2.67741600 | C | 1.42258700  | -0.94829600 | -0.54000500 |
| H | -8.10772300 | -0.25508700 | -1.14205900 | C | 0.99377300  | -0.17619300 | 0.55326400  |
| H | -8.37816300 | -2.03449100 | -3.17828900 | C | 1.75923800  | -0.13153200 | 1.72648600  |
| H | -7.95051400 | -2.66314700 | -1.57887100 | C | 2.98245200  | -0.79340000 | 1.79444000  |
| H | -6.15329900 | -3.55525200 | -2.85689800 | C | 3.44043600  | -1.51860700 | 0.69226800  |
| H | -5.97829100 | -0.90662800 | -4.41225900 | H | 2.98202800  | -2.23390500 | -1.27967400 |
| H | -4.96357000 | -2.35408000 | -4.66796900 | H | 1.39185100  | 0.43694900  | 2.57538600  |
| H | -6.69214000 | -2.41438500 | -5.01852700 | H | 3.57247200  | -0.74857500 | 2.70591700  |
| H | -4.14168400 | -4.00525200 | -2.80470900 | H | 4.40125200  | -2.02358300 | 0.72451800  |
| H | -1.58642100 | -5.59522500 | -1.63197300 |   |             |             |             |

### **SkDHPase.ALN-ES-II**

|   |             |             |             |    |             |             |             |
|---|-------------|-------------|-------------|----|-------------|-------------|-------------|
| C | -8.72690900 | -1.57363000 | -1.91652700 | O  | -3.92944300 | 0.31348500  | -1.94396000 |
| C | -7.56260000 | -1.47215200 | -0.98978300 | O  | -2.44262800 | -1.14536400 | -2.79478300 |
| N | -7.41374400 | -2.21604600 | 0.17306700  | Zn | -3.69610700 | -0.09572000 | 0.10114200  |
| C | -6.42670800 | -0.71632000 | -1.06212500 | Zn | -1.27894400 | -2.58474600 | 1.09596400  |
| C | -6.22427300 | -1.89562000 | 0.74263000  | H  | -8.83150400 | -2.58228900 | -2.33568000 |
| N | -5.59448400 | -0.99155900 | 0.00962200  | H  | -9.67385800 | -1.31958600 | -1.42390600 |
| C | -5.38841100 | 5.30259200  | -0.02942500 | H  | -6.12531500 | -0.00726700 | -1.81396000 |
| C | -4.80504900 | 3.98812300  | 0.38385300  | H  | -8.07798000 | -2.88329300 | 0.54067200  |
| N | -4.44546900 | 3.71153000  | 1.69666500  | H  | -5.86495400 | -2.31152600 | 1.67353500  |
| C | -4.52237300 | 2.83272500  | -0.29895000 | H  | -5.59404800 | 5.29725300  | -1.10273400 |
| C | -3.98086300 | 2.44354900  | 1.76703200  | H  | -4.70425300 | 6.13511900  | 0.17462700  |
| N | -4.01322800 | 1.87970300  | 0.57042900  | H  | -4.64187500 | 2.60407500  | -1.34676000 |
| C | -4.43669400 | -3.25908300 | 4.30414700  | H  | -4.49101400 | 4.36020300  | 2.47060600  |
| N | -4.45327400 | -1.99550700 | 3.58924200  | H  | -3.62135900 | 1.97454200  | 2.66767300  |
| C | -3.39668900 | -1.62917700 | 2.78524500  | H  | -1.63912600 | -4.65052200 | 4.20218700  |
| O | -2.53091000 | -2.55107400 | 2.58606400  | H  | 1.91505900  | -5.97226700 | 4.15896800  |
| O | -3.38585700 | -0.45660600 | 2.30487100  | H  | 3.32170200  | -4.50797200 | 2.59500800  |
| C | -1.02013300 | -5.45988300 | 3.80361900  | H  | 1.88653200  | -3.06361900 | 1.10507900  |
| C | 0.21791000  | -4.91462500 | 3.15715200  | H  | -3.62093100 | -4.21644600 | -3.75336500 |
| N | 0.23100100  | -3.94357600 | 2.15254200  | H  | -2.78159000 | -5.73544500 | -4.08719900 |
| C | 1.51007300  | -5.27450800 | 3.44222200  | H  | -2.63271900 | -2.83834100 | -1.70711600 |
| C | 1.50694800  | -3.74563000 | 1.84994300  | H  | -2.02317000 | -6.97787900 | -1.49981600 |
| N | 2.31165000  | -4.52994400 | 2.60148200  | H  | -0.89955400 | -5.93870300 | 0.53769600  |
| C | -3.37341500 | -5.19588100 | -3.33725000 | H  | -4.28497200 | -4.08007300 | 3.60112400  |
| C | -2.62696300 | -4.99638900 | -2.06600000 | H  | -3.91948000 | -1.17674200 | -4.87025600 |
| N | -2.02943600 | -5.98728600 | -1.29805700 | H  | -5.21068600 | -1.52151100 | -3.69808800 |
| C | -2.36967700 | -3.83556200 | -1.39916600 | H  | -6.33231800 | 5.50778000  | 0.49053800  |
| C | -1.44337900 | -5.40089200 | -0.22363700 | H  | -1.64147600 | -6.01698200 | 3.09069000  |
| N | -1.63452900 | -4.09063300 | -0.25954600 | H  | -0.75354100 | -6.13741600 | 4.61938700  |
| C | -4.46822000 | -0.77779400 | -4.01420800 | H  | -5.40100600 | -3.39470100 | 4.80272200  |
| C | -3.51829000 | -0.50922100 | -2.84184800 | H  | -3.64331700 | -3.30743700 | 5.06154000  |

|   |             |             |             |   |             |             |             |
|---|-------------|-------------|-------------|---|-------------|-------------|-------------|
| H | -8.59054600 | -0.88001100 | -2.74986000 | C | 5.15608900  | 0.00544000  | 4.78557900  |
| H | -5.00845500 | 0.12783100  | -4.30598000 | C | 3.88231800  | -0.53380700 | 4.55285200  |
| H | -4.30816500 | -5.75270100 | -3.19185000 | C | 5.85614700  | 0.52492500  | 3.68928900  |
| H | -4.98819000 | -1.22711200 | 3.97003500  | C | 3.31994600  | -0.54434600 | 3.27762100  |
| C | 0.45644900  | 7.63875500  | 4.43971400  | C | 5.30744400  | 0.52555600  | 2.40441000  |
| C | -0.34307300 | 6.93187100  | 3.33774500  | C | 4.03524400  | -0.00868200 | 2.20234500  |
| C | 0.43929300  | 5.91737000  | 2.48270500  | O | 3.44344500  | 0.08607200  | 0.94280300  |
| C | -0.50640900 | 5.25711600  | 1.46868600  | H | 6.66342700  | 0.63096000  | 6.17544300  |
| C | 1.63395300  | 6.55712400  | 1.75795500  | H | 5.04480900  | 0.57369000  | 6.85073700  |
| C | -3.33926300 | 6.12256200  | -3.57506000 | H | 3.30566100  | -0.92665500 | 5.38748400  |
| C | -2.24050300 | 5.64300900  | -2.63037100 | H | 6.84573900  | 0.94985000  | 3.84263400  |
| S | -0.99579600 | 6.98559400  | -2.37768300 | H | 2.31736000  | -0.92873400 | 3.11358500  |
| C | 3.61191000  | 4.41046300  | -2.14419300 | H | 5.84789700  | 0.94722700  | 1.56129000  |
| C | 2.17911000  | 4.29726200  | -2.66563300 | H | 3.43863600  | -0.78207500 | 0.48898300  |
| O | 1.21456200  | 4.25572400  | -1.88805300 | H | 5.11751700  | -1.95393300 | 6.83457100  |
| C | 4.01484100  | 3.16151800  | -1.33255000 | H | 6.75495400  | -1.89284200 | 6.16450800  |
| C | 5.35447200  | 3.26721700  | -0.61375000 | H | 6.43622600  | -1.26076000 | 7.79078500  |
| O | 6.25075100  | 2.43149600  | -0.75501100 | N | 0.98350700  | -0.33871300 | -0.69732700 |
| N | 5.51443900  | 4.33306200  | 0.21336700  | C | 1.08429700  | 0.94188700  | -1.29389800 |
| N | 2.03575700  | 4.26003000  | -4.00749500 | O | 1.63646000  | 1.16458500  | -2.35946200 |
| C | 0.74340100  | 4.11707300  | -4.67394800 | N | 0.47687700  | 1.81646600  | -0.45674300 |
| H | -1.19172600 | 6.40695600  | 3.80024500  | C | 0.02930100  | 1.19816500  | 0.77975900  |
| H | -0.78205200 | 7.68839600  | 2.66942600  | C | 0.42597800  | -0.27127400 | 0.52605500  |
| H | 0.82223600  | 5.13034900  | 3.14935300  | O | 0.31953500  | -1.19675900 | 1.33784500  |
| H | -1.32535700 | 4.72923000  | 1.97357500  | H | -1.05494800 | 1.25621300  | 0.89396500  |
| H | 0.02958600  | 4.53073500  | 0.84930300  | H | 1.55140700  | -1.13051900 | -1.01192900 |
| H | -0.94426100 | 6.00591100  | 0.79558100  | H | 0.48193200  | 2.81038700  | -0.68244200 |
| H | 2.12534000  | 5.82300000  | 1.10501200  | O | -2.04067300 | -1.10810500 | -0.06035100 |
| H | 1.30843400  | 7.39240400  | 1.12375100  | H | -1.91501600 | -1.14002100 | -1.03697900 |
| H | 2.38302300  | 6.94078000  | 2.45904400  | C | 2.64055100  | 0.48652900  | -5.21037700 |
| H | 1.25009700  | 8.27159700  | 4.02780700  | C | 3.55185600  | -0.62646800 | -4.73203600 |
| H | -2.65937100 | 5.35505000  | -1.66131700 | O | 4.21917200  | -1.32199600 | -5.49160500 |
| H | -1.72568000 | 4.77157400  | -3.04237000 | N | 3.53836000  | -0.79481700 | -3.37322100 |
| H | -0.03584400 | 6.19027500  | -1.85786100 | C | 4.53356300  | -1.60085000 | -2.69368600 |
| H | -3.84811100 | 7.00931000  | -3.18049000 | C | 3.78601600  | -2.64431300 | -1.85362600 |
| H | 4.07634500  | 2.28927400  | -1.98502000 | O | 3.14792900  | -2.27474800 | -0.82910100 |
| H | 3.24155000  | 2.95841000  | -0.58261900 | C | 5.46224800  | -0.74298200 | -1.80869800 |
| H | 4.74851800  | 4.94168300  | 0.46290000  | O | 5.99835500  | 0.29314200  | -2.59578900 |
| H | 6.35726300  | 4.37959000  | 0.77017600  | N | 3.76774900  | -3.93272200 | -2.22819400 |
| H | 4.32712600  | 4.57243500  | -2.95872100 | C | 4.44469600  | -4.58588700 | -3.39094300 |
| H | 0.15618400  | 5.03739500  | -4.59007600 | C | 3.63087000  | -4.47979600 | -4.69073300 |
| H | 0.19119400  | 3.29050500  | -4.21973600 | C | 4.58788400  | -6.03284800 | -2.88216400 |
| H | 2.86388900  | 4.33166600  | -4.58043100 | C | 3.29346800  | -6.26762300 | -2.08699600 |
| H | 3.63676500  | 5.30636200  | -1.51343600 | C | 3.04157400  | -4.91709300 | -1.39852400 |
| H | 0.91926900  | 3.89556600  | -5.72817500 | H | 1.98185100  | -4.65168600 | -1.32928100 |
| H | -2.93270000 | 6.37995000  | -4.55839100 | H | 3.44863700  | -4.89008600 | -0.38123200 |
| H | -4.09018600 | 5.33528100  | -3.71352300 | H | 2.46867500  | -6.51145400 | -2.76491800 |
| H | 0.92476400  | 6.91394500  | 5.11715300  | H | 3.37878500  | -7.08488200 | -1.36511300 |
| H | -0.19509300 | 8.28279700  | 5.04102100  | H | 4.72431600  | -6.74215700 | -3.70281300 |
| C | 6.02852700  | -1.34719200 | 6.77750000  | H | 5.45849100  | -6.11186400 | -2.22006300 |
| C | 5.73853100  | 0.04203500  | 6.18517300  | H | 5.42500100  | -4.12683000 | -3.53738700 |

|   |            |             |             |   |             |            |             |
|---|------------|-------------|-------------|---|-------------|------------|-------------|
| H | 2.61884500 | -4.87994400 | -4.56259900 | H | 3.01642300  | 1.45627200 | -4.86774300 |
| H | 3.56992500 | -3.44440900 | -5.03378300 | H | 2.61398000  | 0.47199600 | -6.30136700 |
| H | 4.13139300 | -5.05959200 | -5.47436500 | C | 0.13107900  | 1.83437900 | 3.22959400  |
| H | 5.12537000 | -2.06313000 | -3.48381200 | O | 0.78465300  | 2.31796700 | 4.14183200  |
| H | 6.20108800 | 1.04164100  | -1.99544000 | N | 0.65945500  | 1.75735200 | 1.94407200  |
| H | 6.24852100 | -1.40175600 | -1.39759000 | N | -1.18216900 | 1.41534300 | 3.39067500  |
| H | 4.89528800 | -0.34295700 | -0.96125000 | H | -1.42523500 | 1.38941000 | 4.37331300  |
| H | 3.02163300 | -0.10091100 | -2.83913700 | H | -1.55135300 | 0.62430900 | 2.86760500  |
| H | 1.63064200 | 0.37359500  | -4.80741000 | H | 1.67066700  | 1.82108200 | 1.92704000  |

### **SkDHPase.ALN-TS1-II**

|   |             |             |              |   |              |             |              |
|---|-------------|-------------|--------------|---|--------------|-------------|--------------|
| C | -2.73098600 | -0.10103200 | -4.80017200  | H | -8.85185200  | -4.72035200 | -3.80704200  |
| C | -3.68153500 | -0.14860600 | -5.94506500  | H | -10.52888800 | -4.44865700 | -4.29340900  |
| N | -3.90668800 | 0.89500300  | -6.83224700  | H | -7.10001400  | -4.10739700 | -5.98964400  |
| C | -4.47771800 | -1.16240800 | -6.39429100  | H | -10.67305000 | -1.90840700 | -5.70697900  |
| C | -4.80426500 | 0.48425600  | -7.76295600  | H | -9.37557400  | -1.05109100 | -7.72790400  |
| N | -5.16444100 | -0.76735300 | -7.52924700  | H | -6.59323500  | 1.73971200  | -13.63028500 |
| C | -9.56332400 | -3.95542200 | -4.12769700  | H | -6.95128000  | 0.33345200  | -17.11780100 |
| C | -9.06437800 | -3.28038400 | -5.36273200  | H | -7.33925300  | -2.19510900 | -16.98076200 |
| N | -9.76631200 | -2.25716500 | -5.98626000  | H | -6.77027100  | -3.11836000 | -14.69465900 |
| C | -7.92953500 | -3.42911200 | -6.11658400  | H | -0.97531700  | -2.86216800 | -9.84479300  |
| C | -9.06126400 | -1.83140000 | -7.05647700  | H | 0.05000800   | -2.85500600 | -11.28372600 |
| N | -7.93992400 | -2.52573700 | -7.16823400  | H | -3.58564400  | -2.70443500 | -10.37682900 |
| C | -6.95819100 | 2.60919800  | -10.69330200 | H | -1.09035700  | -0.94477700 | -13.24331100 |
| N | -7.32155900 | 1.53886600  | -9.78360900  | H | -3.48976600  | -0.68625400 | -14.06125100 |
| C | -7.22579500 | 0.22970600  | -10.18342700 | H | -5.93562800  | 2.46712400  | -11.04771100 |
| O | -6.61350900 | 0.05816700  | -11.29127000 | H | -2.21853700  | -4.94817600 | -7.67887300  |
| O | -7.70540200 | -0.67137700 | -9.42693100  | H | -2.44805500  | -3.27256600 | -7.12762300  |
| C | -5.99742600 | 1.45357300  | -14.50229100 | H | -9.68656200  | -3.24650500 | -3.29958800  |
| C | -6.36451700 | 0.07654000  | -14.97618800 | H | -4.94281400  | 1.51576100  | -14.20521800 |
| N | -6.33233200 | -1.07963600 | -14.18962400 | H | -6.16698600  | 2.18259900  | -15.29917900 |
| C | -6.78366100 | -0.26520200 | -16.23576600 | H | -7.01715500  | 3.56154800  | -10.15830800 |
| C | -6.71132000 | -2.07843300 | -14.97830800 | H | -7.61870900  | 2.66087400  | -11.56848000 |
| N | -6.98323100 | -1.63062000 | -16.22186800 | H | -2.75290200  | -1.05587000 | -4.26932100  |
| C | -0.67059000 | -2.26303000 | -10.70606800 | H | -3.19653900  | -4.59393900 | -6.22117200  |
| C | -1.88217100 | -1.91881200 | -11.50134900 | H | -0.14628300  | -1.37252600 | -10.33623000 |
| N | -1.89799600 | -1.26714500 | -12.72766700 | H | -7.97736500  | 1.72554900  | -9.03836700  |
| C | -3.19485000 | -2.16122900 | -11.21992500 | C | -15.72465400 | -5.23249600 | -8.59992500  |
| C | -3.18727300 | -1.14581500 | -13.13272000 | C | -14.28156700 | -5.20645700 | -8.07995400  |
| N | -3.99924500 | -1.68003800 | -12.23292000 | C | -13.24703700 | -5.99752200 | -8.90220100  |
| C | -2.92952400 | -4.25381900 | -7.22607700  | C | -11.87003500 | -5.90095300 | -8.22793600  |
| C | -4.16878600 | -4.09848600 | -8.10865100  | C | -13.64625900 | -7.46859300 | -9.09456000  |
| O | -5.22772600 | -3.63924100 | -7.54380200  | C | -8.21561000  | -7.89748000 | -4.42193700  |
| O | -4.06484800 | -4.35721100 | -9.32895500  | C | -9.03252500  | -7.73228300 | -5.70087600  |
| Z | -6.39385200 | -2.17158100 | -8.46678200  | S | -10.21428300 | -9.14165400 | -5.87673000  |
| Z | -6.03828000 | -1.61878300 | -12.08089400 | C | -9.86216000  | -9.44247900 | -11.16166600 |
| H | -1.69882100 | 0.07384700  | -5.12895400  | C | -9.02278700  | -9.17093700 | -9.91424300  |
| H | -2.98635000 | 0.68589400  | -4.07941400  | O | -9.22213900  | -8.16729000 | -9.21319600  |
| H | -4.59314500 | -2.16056300 | -6.00749800  | C | -9.76489800  | -8.25301900 | -12.13743600 |
| H | -3.48042700 | 1.81073300  | -6.79364800  | C | -10.69934100 | -8.34830700 | -13.33573000 |
| H | -5.18195000 | 1.11210300  | -8.55613800  | O | -10.28432800 | -8.45408700 | -14.49351100 |

|   |              |              |              |   |              |              |              |
|---|--------------|--------------|--------------|---|--------------|--------------|--------------|
| N | -12.02825800 | -8.31751300  | -13.06170900 | C | -7.13033400  | -6.05903300  | -10.89410700 |
| N | -8.07314100  | -10.08076300 | -9.62237000  | O | -6.69312600  | -7.19836100  | -10.97678300 |
| C | -7.14864100  | -9.92145600  | -8.50391900  | N | -8.04850800  | -5.57386300  | -10.00785100 |
| H | -13.94269000 | -4.16225600  | -8.02420700  | C | -8.50755800  | -4.24178700  | -10.36908200 |
| H | -14.26975300 | -5.58665800  | -7.04661700  | C | -7.47551200  | -3.87336400  | -11.46840400 |
| H | -13.17159000 | -5.52450300  | -9.89268700  | O | -7.63001500  | -2.93221600  | -12.30594200 |
| H | -11.53455100 | -4.85854700  | -8.16339400  | H | -8.45083200  | -3.54850300  | -9.53345400  |
| H | -11.11263600 | -6.47035600  | -8.77677100  | H | -6.20221700  | -5.10873700  | -12.60104400 |
| H | -11.91068900 | -6.30947000  | -7.20857000  | H | -8.59861200  | -6.24475200  | -9.47245500  |
| H | -12.86194900 | -8.01726000  | -9.63513900  | O | -6.09945500  | -2.83698500  | -10.31184500 |
| H | -13.78086700 | -7.97339900  | -8.12873300  | H | -5.39340800  | -3.51498500  | -10.14328700 |
| H | -14.57992300 | -7.57460400  | -9.65755500  | C | -4.79935300  | -9.57942300  | -11.88501000 |
| H | -16.15530100 | -6.23910500  | -8.56168600  | C | -4.64593900  | -9.04105800  | -13.29329100 |
| H | -9.59886700  | -6.79582800  | -5.68059900  | O | -4.00768100  | -9.61981800  | -14.16755300 |
| H | -8.39047500  | -7.71784500  | -6.58485700  | N | -5.26971300  | -7.83831600  | -13.48139900 |
| H | -10.53363000 | -8.89212800  | -7.16369400  | C | -5.50337200  | -7.30427600  | -14.80910800 |
| H | -8.85922000  | -7.92912000  | -3.53570600  | C | -4.91259900  | -5.89216800  | -14.88335700 |
| H | -8.74768600  | -8.17775300  | -12.52568200 | O | -5.43767400  | -4.96538100  | -14.22098600 |
| H | -9.98748300  | -7.33612200  | -11.58019800 | C | -7.00819500  | -7.27156700  | -15.15009800 |
| H | -12.38201300 | -8.07213400  | -12.14777900 | O | -7.51128800  | -8.57572900  | -14.98788600 |
| H | -12.67361400 | -8.29061800  | -13.83990700 | N | -3.84081800  | -5.64311200  | -15.65523400 |
| H | -9.55634900  | -10.36706700 | -11.66376400 | C | -3.01521800  | -6.60492700  | -16.43816100 |
| H | -7.68386900  | -9.97921200  | -7.55073400  | C | -2.03261900  | -7.37469100  | -15.54554100 |
| H | -6.64117900  | -8.95595500  | -8.58114300  | C | -2.32620100  | -5.66631600  | -17.44652500 |
| H | -7.95681100  | -10.87270200 | -10.23752600 | C | -2.06940000  | -4.38487900  | -16.63621200 |
| H | -10.89760600 | -9.58184700  | -10.82906500 | C | -3.31185500  | -4.26723300  | -15.73849800 |
| H | -6.40928800  | -10.72292100 | -8.54963500  | H | -3.09746200  | -3.88274700  | -14.73685800 |
| H | -7.62715800  | -8.82057300  | -4.44229300  | H | -4.07900400  | -3.61661600  | -16.17611300 |
| H | -7.51970300  | -7.05748000  | -4.30502500  | H | -1.16615700  | -4.49590900  | -16.02663200 |
| H | -15.78045400 | -4.88352800  | -9.63859800  | H | -1.93316500  | -3.50215500  | -17.26797300 |
| H | -16.36620800 | -4.58008600  | -7.99686900  | H | -1.41385700  | -6.10623600  | -17.85840500 |
| C | -12.65108300 | -2.36155000  | -18.57849300 | H | -3.00461000  | -5.45527000  | -18.28195000 |
| C | -13.33490800 | -2.88464700  | -17.30656100 | H | -3.67063800  | -7.31120100  | -16.95384300 |
| C | -12.31001700 | -3.38531700  | -16.31772500 | H | -1.40927900  | -6.68982400  | -14.95966800 |
| C | -11.63543800 | -2.49081500  | -15.47909100 | H | -2.55867800  | -8.05328100  | -14.87064200 |
| C | -11.92939000 | -4.73273600  | -16.28581500 | H | -1.37221500  | -7.98457500  | -16.17295300 |
| C | -10.60513600 | -2.91783400  | -14.64532100 | H | -5.00717800  | -7.99127400  | -15.49449400 |
| C | -10.90176600 | -5.18246900  | -15.45962300 | H | -8.47581400  | -8.52942000  | -14.81517900 |
| C | -10.23664400 | -4.26602800  | -14.64373200 | H | -7.11763100  | -6.91202500  | -16.18972100 |
| O | -9.22384900  | -4.73137400  | -13.83521200 | H | -7.51791900  | -6.54328700  | -14.50586500 |
| H | -14.03191000 | -3.68982100  | -17.56919900 | H | -5.86104500  | -7.52278200  | -12.71544100 |
| H | -13.93552000 | -2.08311300  | -16.85791900 | H | -4.51803200  | -8.82819800  | -11.14112100 |
| H | -11.92109100 | -1.44081700  | -15.47544800 | H | -5.84557400  | -9.84107600  | -11.69454600 |
| H | -12.44047100 | -5.44576800  | -16.92953900 | H | -4.17423600  | -10.46725600 | -11.77557400 |
| H | -10.10261900 | -2.21753800  | -13.98201500 | C | -10.78446600 | -3.20515900  | -10.78422800 |
| H | -10.61197100 | -6.22854100  | -15.43915700 | O | -11.90776500 | -3.33148000  | -11.25033700 |
| H | -8.75276100  | -3.96333900  | -13.45480000 | N | -9.86148100  | -4.24366900  | -10.86629100 |
| H | -11.97177800 | -1.53384000  | -18.34349600 | N | -10.38462500 | -2.07298200  | -10.08958400 |
| H | -12.06022800 | -3.15139500  | -19.05624600 | H | -11.07197100 | -1.33620300  | -10.18967600 |
| H | -13.38484500 | -1.99899800  | -19.30830000 | H | -9.42302600  | -1.74537200  | -10.15370400 |
| N | -6.78824400  | -5.00629300  | -11.75551200 | H | -10.07038500 | -4.88434000  | -11.62423700 |

**SkDHPase.ALN-INT1-II**

|    |             |             |             |   |             |             |             |
|----|-------------|-------------|-------------|---|-------------|-------------|-------------|
| C  | 2.15262800  | 8.45420500  | -1.27696600 | H | -3.55582000 | -0.97158200 | 1.13068400  |
| C  | 1.65322900  | 7.29428300  | -0.48886900 | H | -2.30058300 | 4.99796900  | -3.51404300 |
| N  | 0.68225900  | 7.36230400  | 0.50105300  | H | -4.03251900 | 4.92309500  | -3.85651600 |
| C  | 1.97269900  | 5.97010500  | -0.56856100 | H | -1.52795000 | 3.23826100  | -1.59771900 |
| C  | 0.45378900  | 6.10990000  | 0.96871200  | H | -5.48308900 | 4.59433700  | -1.31436100 |
| N  | 1.21754600  | 5.23735700  | 0.33097000  | H | -5.09942900 | 2.96867600  | 0.60469500  |
| C  | 7.03297400  | 2.48328400  | 0.31033700  | H | -2.08934300 | 5.11127500  | 3.94399000  |
| C  | 5.59999200  | 2.50641600  | 0.71927000  | H | 0.62225400  | 4.11138400  | -4.57265300 |
| N  | 5.16613900  | 2.15903600  | 1.99145700  | H | 0.82609300  | 5.35931500  | -3.31786600 |
| C  | 4.45771600  | 2.84004000  | 0.04300800  | H | 7.64197800  | 3.16262500  | 0.91949900  |
| C  | 3.82193000  | 2.28736700  | 2.04759400  | H | -4.99401600 | 3.37306300  | 3.15095700  |
| N  | 3.36206400  | 2.70263200  | 0.87733700  | H | -5.36090000 | 2.61692300  | 4.70927400  |
| C  | -1.28732800 | 4.78322400  | 4.60810800  | H | -0.96774400 | 5.63015100  | 5.22143600  |
| N  | -0.15646700 | 4.31852300  | 3.82541100  | H | -1.68839200 | 4.00618300  | 5.27238300  |
| C  | -0.29399500 | 3.38972500  | 2.82751700  | H | 2.91449600  | 8.11333400  | -1.98211200 |
| O  | -1.49487300 | 3.12809500  | 2.47869300  | H | 2.25224200  | 4.55553900  | -3.98105000 |
| O  | 0.76934800  | 2.90921900  | 2.31926500  | H | -3.39327000 | 6.21465500  | -2.82675900 |
| C  | -4.67096000 | 2.60144500  | 3.86125000  | H | 0.77492600  | 4.41053100  | 4.20534600  |
| C  | -4.64935300 | 1.24012500  | 3.23265700  | C | 6.68214000  | -4.11178500 | 4.30725000  |
| N  | -3.78126500 | 0.87775200  | 2.20237100  | C | 6.38885400  | -3.01692700 | 3.27353100  |
| C  | -5.43700700 | 0.15913300  | 3.52908300  | C | 4.97346300  | -2.99557000 | 2.68474500  |
| C  | -4.05282000 | -0.38615100 | 1.89249600  | C | 4.88289500  | -1.87477300 | 1.63939400  |
| N  | -5.04937300 | -0.85127000 | 2.67039000  | C | 4.56158800  | -4.34031600 | 2.07544300  |
| C  | -3.29167000 | 5.15195600  | -3.08080200 | C | 7.04232300  | 0.53890300  | -3.38588500 |
| C  | -3.44017200 | 4.27127200  | -1.88513100 | C | 6.12458000  | -0.28353700 | -2.48535900 |
| N  | -4.60006700 | 4.13611200  | -1.13426900 | S | 6.90637100  | -1.91247100 | -2.09593200 |
| C  | -2.53360500 | 3.44990200  | -1.27474500 | C | 3.02886400  | -5.26280400 | -2.45401000 |
| C  | -4.36097300 | 3.26367000  | -0.12527400 | C | 3.30810800  | -3.81594600 | -2.86221200 |
| N  | -3.10979900 | 2.83159300  | -0.18158400 | O | 3.57180900  | -2.93609300 | -2.03004800 |
| C  | 1.20658400  | 4.40272400  | -3.69782200 | C | 2.44936700  | -5.36084000 | -1.04510800 |
| C  | 1.08317400  | 3.36418400  | -2.59715100 | C | 1.05044800  | -4.76252800 | -0.96957300 |
| O  | 1.95152700  | 3.38802500  | -1.65779600 | O | 0.32850900  | -4.68470700 | -1.96371300 |
| O  | 0.09642600  | 2.58474700  | -2.63377600 | N | 0.66347300  | -4.30204400 | 0.25322800  |
| Zn | 1.46379400  | 3.16724400  | 0.36446900  | N | 3.30428200  | -3.58875000 | -4.19293700 |
| Zn | -2.15873100 | 1.74376700  | 1.25347900  | C | 3.58239000  | -2.28590100 | -4.78128400 |
| H  | 1.35304900  | 8.93338700  | -1.85569600 | H | 6.58623100  | -2.03624800 | 3.73254100  |
| H  | 2.60835900  | 9.22389600  | -0.64170300 | H | 7.11286300  | -3.10909200 | 2.44938400  |
| H  | 2.66267900  | 5.48137100  | -1.23417800 | H | 4.25980300  | -2.77397500 | 3.48953500  |
| H  | 0.22316900  | 8.20190600  | 0.82699600  | H | 5.08383000  | -0.89552000 | 2.09489600  |
| H  | -0.24219100 | 5.88052400  | 1.76081000  | H | 3.89114400  | -1.83268100 | 1.18126500  |
| H  | 7.12513300  | 2.79741900  | -0.73221200 | H | 5.61827500  | -2.02481600 | 0.83872900  |
| H  | 7.46417600  | 1.47842000  | 0.39395700  | H | 3.52784800  | -4.27830900 | 1.72082100  |
| H  | 4.33196800  | 3.14983300  | -0.98268700 | H | 5.20414400  | -4.61071700 | 1.22653200  |
| H  | 5.75096800  | 1.81324300  | 2.74036900  | H | 4.60626900  | -5.15428700 | 2.80625200  |
| H  | 3.21685600  | 2.03910000  | 2.90552100  | H | 6.64362800  | -5.11275300 | 3.86487400  |
| H  | -3.67457300 | 2.88563600  | 4.21199800  | H | 5.91725400  | 0.24854300  | -1.55139600 |
| H  | -6.21874300 | 0.02500400  | 4.26055600  | H | 5.16730400  | -0.47678800 | -2.97453500 |
| H  | -5.38813700 | -1.80376100 | 2.67004300  | H | 5.75565000  | -2.54183200 | -1.77012200 |

|   |             |             |             |   |             |             |             |
|---|-------------|-------------|-------------|---|-------------|-------------|-------------|
| H | 8.01719700  | 0.71169200  | -2.91534400 | H | 0.04351400  | 1.90883400  | -1.23714100 |
| H | 3.11042200  | -4.86038800 | -0.33451500 | C | -0.46870300 | -2.48783300 | -5.42693900 |
| H | 2.38256600  | -6.41558800 | -0.74706900 | C | -1.85101600 | -2.78076800 | -4.86573900 |
| H | 1.17588500  | -4.52675700 | 1.09771500  | O | -2.78220500 | -3.15610200 | -5.57666400 |
| H | -0.28659800 | -3.96418300 | 0.37442100  | N | -1.97310900 | -2.56786500 | -3.51954800 |
| H | 2.34818200  | -5.73315700 | -3.16994200 | C | -3.20020600 | -2.84816600 | -2.79963000 |
| H | 4.64164100  | -2.02666400 | -4.67817800 | C | -3.82804300 | -1.57171500 | -2.21686000 |
| H | 2.96703900  | -1.52661500 | -4.29160800 | O | -3.19024700 | -0.87036100 | -1.40258100 |
| H | 3.04921700  | -4.34977900 | -4.80524600 | C | -2.97685100 | -3.81624600 | -1.60916900 |
| H | 3.97968100  | -5.81035000 | -2.49220300 | O | -2.47321000 | -5.06687200 | -1.99799100 |
| H | 3.32809500  | -2.32207700 | -5.84246500 | N | -5.11099600 | -1.27207100 | -2.50114600 |
| H | 7.21856000  | 0.03143700  | -4.33956300 | C | -5.94382100 | -1.84859600 | -3.58743700 |
| H | 6.59195800  | 1.51658700  | -3.59774100 | C | -5.42146500 | -1.40933000 | -4.95564700 |
| H | 5.96139800  | -4.08635000 | 5.13462900  | C | -7.33953600 | -1.29623600 | -3.24287400 |
| H | 7.68283000  | -3.98309200 | 4.73517700  | C | -7.05080400 | 0.09776600  | -2.66158100 |
| C | -3.84832200 | -5.70433500 | 6.26522200  | C | -5.74868000 | -0.10270500 | -1.87000100 |
| C | -2.36413700 | -5.41291500 | 6.00373600  | H | -5.07366000 | 0.75722600  | -1.90351600 |
| C | -2.16259500 | -4.59858300 | 4.74676300  | H | -5.94090400 | -0.32211400 | -0.81106800 |
| C | -1.83047200 | -3.24158100 | 4.79423000  | H | -6.89688200 | 0.82120000  | -3.46980300 |
| C | -2.35301000 | -5.18251300 | 3.48575200  | H | -7.86379500 | 0.47354700  | -2.03293300 |
| C | -1.67469000 | -2.48567400 | 3.63113800  | H | -7.99591600 | -1.27175800 | -4.11700500 |
| C | -2.20705600 | -4.44741200 | 2.31483100  | H | -7.81462500 | -1.93005500 | -2.48420200 |
| C | -1.84878000 | -3.09450900 | 2.38568700  | H | -5.93713600 | -2.94011500 | -3.51873400 |
| O | -1.67397500 | -2.43590000 | 1.19831400  | H | -5.35965900 | -0.31630800 | -5.01818800 |
| H | -1.81887200 | -6.36263500 | 5.92459200  | H | -4.44209600 | -1.83911100 | -5.17504900 |
| H | -1.93619500 | -4.88193100 | 6.86279900  | H | -6.10570700 | -1.75291500 | -5.74142900 |
| H | -1.67391900 | -2.76456800 | 5.75940300  | H | -3.85777400 | -3.33359800 | -3.51902900 |
| H | -2.61312500 | -6.23676500 | 3.41763700  | H | -1.51217200 | -4.95757900 | -2.14377800 |
| H | -1.38252500 | -1.44051600 | 3.68523500  | H | -3.95051300 | -3.99096600 | -1.13052000 |
| H | -2.35027400 | -4.91255300 | 1.34274900  | H | -2.33949500 | -3.31647900 | -0.87084100 |
| H | -1.34201800 | -1.50779700 | 1.31501000  | H | -1.12453000 | -2.29341900 | -3.02588600 |
| H | -4.41479300 | -4.77317000 | 6.38407300  | H | -0.22657300 | -1.42684500 | -5.31309100 |
| H | -4.29457800 | -6.25991600 | 5.43271600  | H | 0.29926600  | -3.04716900 | -4.88517400 |
| H | -3.98248600 | -6.30021200 | 7.17555200  | H | -0.46520200 | -2.75883800 | -6.48410800 |
| N | -0.44271200 | -0.34705000 | -1.09351800 | C | 1.35898400  | -0.22816800 | 0.37974300  |
| C | 0.64436300  | -0.89231100 | -1.72668100 | C | 1.51543000  | -1.40706000 | 2.61595900  |
| O | 0.64339900  | -1.52291200 | -2.77852600 | O | 1.67972700  | -2.45980000 | 3.22680500  |
| N | 1.76761100  | -0.60578800 | -0.95923900 | N | 1.35694900  | -1.38028600 | 1.25296200  |
| C | -0.08316600 | 0.34552900  | 0.10772500  | N | 1.52647400  | -0.16041400 | 3.24379100  |
| O | -0.96465200 | 0.22887800  | 1.12453600  | H | 1.99848700  | 0.54200600  | 0.81100200  |
| H | -1.41749800 | -0.53748700 | -1.35112000 | H | 1.28023600  | -2.29238100 | 0.81363100  |
| H | 2.56908000  | -1.21441800 | -1.12005100 | H | 0.89027300  | 0.54120500  | 2.87407000  |
| O | 0.04068200  | 1.78628900  | -0.21664300 | H | 1.46944400  | -0.26811800 | 4.24948300  |

**SkDHPase.ALN-INT2-II**

|   |            |            |             |   |            |            |             |
|---|------------|------------|-------------|---|------------|------------|-------------|
| C | 3.92196100 | 7.78608700 | -1.03625000 | N | 2.36359800 | 4.70338000 | 0.37274200  |
| C | 3.21381300 | 6.67580400 | -0.33217400 | C | 7.40625200 | 0.80745200 | 0.03499200  |
| N | 2.34595700 | 6.87015700 | 0.73300800  | C | 6.04927900 | 1.18231400 | 0.51269100  |
| C | 3.21130500 | 5.32154400 | -0.53177300 | N | 5.65972300 | 1.05311800 | 1.83712800  |
| C | 1.86251500 | 5.66846900 | 1.12855200  | C | 4.95114100 | 1.69166200 | -0.12538300 |

|    |             |             |             |   |             |             |             |
|----|-------------|-------------|-------------|---|-------------|-------------|-------------|
| C  | 4.38286800  | 1.46955300  | 1.96067800  | H | -0.51685700 | 3.86926800  | 5.44895600  |
| N  | 3.92159400  | 1.86612700  | 0.78325500  | H | 4.55072400  | 7.37803900  | -1.83141400 |
| C  | -0.04140400 | 4.63231800  | 4.81942700  | H | 3.08503200  | 4.24899300  | -3.81762500 |
| N  | 1.02894600  | 4.09912000  | 4.01027000  | H | -2.14545200 | 6.94169200  | -2.50573700 |
| C  | 0.73222700  | 3.11294000  | 3.10431400  | H | 1.96429600  | 4.06934800  | 4.39249000  |
| O  | -0.50573800 | 2.93138500  | 2.88689200  | C | 5.73810500  | -5.76581400 | 3.72333800  |
| O  | 1.71794300  | 2.51130900  | 2.56499600  | C | 5.65963700  | -4.57605900 | 2.75786200  |
| C  | -3.84889500 | 3.29438700  | 4.12668600  | C | 4.28566200  | -3.93265300 | 2.53760400  |
| C  | -4.13362900 | 2.03616100  | 3.36483000  | C | 4.43981900  | -2.76850800 | 1.54649300  |
| N  | -3.35157800 | 1.59401700  | 2.30052100  | C | 3.23095800  | -4.93035700 | 2.04249900  |
| C  | -5.15287900 | 1.14029100  | 3.55593500  | C | 6.85544700  | -0.87748100 | -3.74660000 |
| C  | -3.89714200 | 0.46416000  | 1.86489500  | C | 5.79910800  | -1.50136500 | -2.83752100 |
| N  | -4.98965100 | 0.16072300  | 2.59545000  | S | 6.16171100  | -3.29341800 | -2.56748500 |
| C  | -2.17893400 | 5.87047600  | -2.74170200 | C | 0.73803800  | -4.74024700 | -2.58909600 |
| C  | -2.40122900 | 5.03271200  | -1.52878300 | C | 1.89628600  | -3.89926500 | -3.11782000 |
| N  | -3.55991600 | 5.07029400  | -0.76568900 | O | 2.71186300  | -3.33505200 | -2.37172700 |
| C  | -1.61418500 | 4.09575800  | -0.91550300 | C | 1.00054800  | -5.28465400 | -1.18618800 |
| C  | -3.43921300 | 4.17763300  | 0.24710000  | C | -0.27212500 | -5.48021300 | -0.36490700 |
| N  | -2.26548300 | 3.57284600  | 0.18250300  | O | -1.40479200 | -5.32537400 | -0.82323400 |
| C  | 2.01641500  | 4.18661400  | -3.60194000 | N | -0.07013700 | -5.86043800 | 0.92288100  |
| C  | 1.74610000  | 3.02446100  | -2.67033800 | N | 1.95882400  | -3.77800700 | -4.46219000 |
| O  | 2.53419000  | 2.70187400  | -1.77926500 | C | 2.80833800  | -2.78786200 | -5.11370100 |
| O  | 0.57731100  | 2.44936700  | -2.87833500 | H | 6.34939800  | -3.79506800 | 3.11200000  |
| Zn | 2.08803800  | 2.65516200  | 0.50592600  | H | 6.05404700  | -4.89244000 | 1.78005900  |
| Zn | -1.50982400 | 2.11038000  | 1.40448900  | H | 3.92496600  | -3.52798400 | 3.49438300  |
| H  | 3.21959000  | 8.49308000  | -1.49451100 | H | 5.12935500  | -2.00844500 | 1.93765500  |
| H  | 4.57100300  | 8.35305800  | -0.35793300 | H | 3.48200400  | -2.28415600 | 1.34298300  |
| H  | 3.75410800  | 4.74531000  | -1.26229900 | H | 4.84877800  | -3.12354500 | 0.59135700  |
| H  | 2.11877200  | 7.75969700  | 1.15668400  | H | 2.26532700  | -4.41852900 | 1.97278000  |
| H  | 1.19760400  | 5.53389900  | 1.96889400  | H | 3.50418700  | -5.33511800 | 1.05826500  |
| H  | 7.50352300  | 1.03202600  | -1.03007300 | H | 3.11640800  | -5.77195000 | 2.73521800  |
| H  | 7.60162900  | -0.26395900 | 0.16530600  | H | 5.17313600  | -6.63015200 | 3.35763400  |
| H  | 4.81871300  | 1.93161200  | -1.16839500 | H | 5.76891800  | -0.99171400 | -1.86894700 |
| H  | 6.22026100  | 0.66042300  | 2.58131300  | H | 4.80343300  | -1.42471400 | -3.28020400 |
| H  | 3.81781700  | 1.45521800  | 2.87685700  | H | 4.88813600  | -3.64628600 | -2.28482200 |
| H  | -2.83032600 | 3.28455500  | 4.52723600  | H | 7.86124600  | -0.98144900 | -3.32325800 |
| H  | -5.95595300 | 1.11316900  | 4.27612500  | H | 1.66080700  | -4.58980600 | -0.65481300 |
| H  | -5.53005200 | -0.68869900 | 2.50535200  | H | 1.54055600  | -6.23917600 | -1.22573100 |
| H  | -3.53431200 | -0.12748600 | 1.03593100  | H | 0.84721100  | -5.79443300 | 1.34192300  |
| H  | -1.22751900 | 5.59680100  | -3.20439300 | H | -0.86216600 | -5.81901800 | 1.55311600  |
| H  | -2.96397500 | 5.72011700  | -3.49271100 | H | -0.14026000 | -4.08407100 | -2.56691400 |
| H  | -0.64611600 | 3.72457100  | -1.20354700 | H | 3.86079600  | -2.99216200 | -4.89945100 |
| H  | -4.36944500 | 5.64918800  | -0.94406700 | H | 2.55740200  | -1.77953900 | -4.76648400 |
| H  | -4.20822600 | 3.98651100  | 0.97975400  | H | 1.20803800  | -4.18388900 | -5.00278000 |
| H  | -0.81202000 | 5.07128500  | 4.18285800  | H | 0.49709100  | -5.54651200 | -3.29089200 |
| H  | 1.44906700  | 4.09228600  | -4.52982100 | H | 2.64998400  | -2.84980600 | -6.19221400 |
| H  | 1.71697400  | 5.11247600  | -3.09695700 | H | 6.85943200  | -1.35377900 | -4.73200100 |
| H  | 8.19196200  | 1.35957900  | 0.56539500  | H | 6.65797300  | 0.19319800  | -3.88561100 |
| H  | -3.93828300 | 4.18580000  | 3.49241100  | H | 5.34302000  | -5.50708600 | 4.71415200  |
| H  | -4.55008200 | 3.40475000  | 4.95851800  | H | 6.77750500  | -6.08679600 | 3.85403700  |
| H  | 0.36043100  | 5.41569400  | 5.46919800  | C | -4.80875300 | -5.11210500 | 6.08916300  |



|   |             |             |             |   |             |             |             |
|---|-------------|-------------|-------------|---|-------------|-------------|-------------|
| C | -3.29985500 | -4.98387200 | 5.82885000  | C | -3.65896900 | -3.01598300 | -1.78228300 |
| C | -2.97052700 | -4.21382300 | 4.56743900  | O | -3.43250000 | -4.23775700 | -2.44463800 |
| C | -2.50224500 | -2.89706800 | 4.61422600  | N | -5.28677500 | 0.05616900  | -2.39299200 |
| C | -3.13322600 | -4.79868000 | 3.30140300  | C | -6.29931800 | -0.28692900 | -3.42614900 |
| C | -2.17768200 | -2.18962200 | 3.45482800  | C | -5.79121500 | 0.03240500  | -4.83591400 |
| C | -2.81706200 | -4.11127200 | 2.13201900  | C | -7.49777300 | 0.57673200  | -2.98838200 |
| C | -2.31091000 | -2.80452600 | 2.20573200  | C | -6.84693600 | 1.85157100  | -2.42705100 |
| O | -1.95880100 | -2.20044200 | 1.03325700  | C | -5.58848600 | 1.32952100  | -1.71610800 |
| H | -2.86318300 | -5.98985700 | 5.76937100  | H | -4.72980000 | 2.00431300  | -1.78320900 |
| H | -2.82415300 | -4.49509900 | 6.68820800  | H | -5.76720500 | 1.14091900  | -0.64923500 |
| H | -2.36226700 | -2.41591400 | 5.58025200  | H | -6.57100200 | 2.52714900  | -3.24424000 |
| H | -3.50898300 | -5.81803400 | 3.22890900  | H | -7.50629500 | 2.40381800  | -1.75041900 |
| H | -1.77604300 | -1.18217900 | 3.51988500  | H | -8.18556300 | 0.77143400  | -3.81579600 |
| H | -2.92204100 | -4.57715700 | 1.15624200  | H | -8.05918000 | 0.06254300  | -2.19885500 |
| H | -1.61782900 | -1.27052700 | 1.15159000  | H | -6.54896900 | -1.34943300 | -3.35563200 |
| H | -5.27366400 | -4.12519000 | 6.19891900  | H | -5.47401000 | 1.07943700  | -4.91201000 |
| H | -5.31096300 | -5.62422900 | 5.26039600  | H | -4.96268800 | -0.61574600 | -5.12903400 |
| H | -5.00447900 | -5.68255000 | 7.00453000  | H | -6.59826300 | -0.12825300 | -5.56123300 |
| N | -0.35268200 | 0.22225300  | -1.34386500 | H | -4.60362800 | -2.20040400 | -3.52758900 |
| C | 0.41971100  | -0.82078000 | -1.84158900 | H | -2.72122300 | -4.70559500 | -1.97054000 |
| O | 0.20105000  | -1.43330700 | -2.88873700 | H | -4.59008800 | -3.05186900 | -1.18743700 |
| N | 1.48172600  | -1.01846600 | -1.00585800 | H | -2.84929500 | -2.75773500 | -1.09229400 |
| C | 0.03056700  | 0.53084700  | 0.06962200  | H | -1.71525100 | -1.66192200 | -3.19037300 |
| O | -1.00583300 | 0.30867000  | 0.92771400  | H | -1.28551300 | -1.75131300 | -6.62793700 |
| H | -1.36681200 | 0.12029400  | -1.48473400 | H | -0.49973300 | -1.47992100 | -5.03437400 |
| H | 2.08317500  | -1.82207500 | -1.18877600 | H | -0.87300300 | -3.12096500 | -5.59396200 |
| O | 0.38686400  | 1.88279900  | 0.12639700  | C | 1.25071900  | -0.47528500 | 0.31776600  |
| H | 0.36234100  | 1.71939700  | -2.21670200 | C | 1.27029900  | -1.57253600 | 2.60681000  |
| C | -1.22107000 | -2.08037900 | -5.58763600 | O | 1.08143100  | -2.58112400 | 3.27885600  |
| C | -2.60877200 | -2.04581400 | -4.98115000 | N | 1.00115900  | -1.54936000 | 1.25199200  |
| O | -3.62115600 | -2.25217500 | -5.64718600 | N | 1.84429600  | -0.42419700 | 3.14187200  |
| N | -2.61878100 | -1.76616600 | -3.64769600 | H | 2.11848400  | 0.07267400  | 0.68616800  |
| C | -3.81314900 | -1.90401600 | -2.83953400 | H | 0.33111900  | -2.25663800 | 0.96924000  |
| C | -4.11392000 | -0.56685400 | -2.15325200 | H | 1.51650800  | 0.48328100  | 2.81864500  |
| O | -3.28761500 | -0.07372300 | -1.35906000 | H | 1.89088200  | -0.49780300 | 4.15117000  |

### **SkDHPase.ALN-TS2-II**

|   |             |            |             |   |             |            |             |
|---|-------------|------------|-------------|---|-------------|------------|-------------|
| C | 3.98050000  | 7.73084100 | -1.08300000 | N | 1.05292300  | 4.10511200 | 3.97934800  |
| C | 3.27310100  | 6.64583600 | -0.34854500 | C | 0.75940400  | 3.09562500 | 3.09375900  |
| N | 2.48051300  | 6.85552500 | 0.77054800  | O | -0.48190100 | 2.88136100 | 2.91337800  |
| C | 3.20770400  | 5.29851500 | -0.56999800 | O | 1.74484400  | 2.51198600 | 2.54052900  |
| C | 1.97838200  | 5.66498700 | 1.17799000  | C | -3.82548800 | 3.33309200 | 4.10774000  |
| N | 2.39706400  | 4.69816100 | 0.37654400  | C | -4.13183900 | 2.08148200 | 3.34321800  |
| C | 7.41381400  | 0.73532800 | 0.04142800  | N | -3.34833800 | 1.62086800 | 2.28858500  |
| C | 6.05860100  | 1.13878800 | 0.50207400  | C | -5.17481000 | 1.21031000 | 3.52093100  |
| N | 5.68523000  | 1.10148900 | 1.83718800  | C | -3.91917600 | 0.50887500 | 1.84057800  |
| C | 4.95218700  | 1.60424900 | -0.15622500 | N | -5.02980400 | 0.23341200 | 2.55496200  |
| C | 4.41013100  | 1.52780000 | 1.94714900  | C | -2.13305000 | 5.84677500 | -2.77824300 |
| N | 3.93419100  | 1.84173000 | 0.75160300  | C | -2.35256900 | 5.04468000 | -1.54078600 |
| C | -0.00885800 | 4.64861000 | 4.79307900  | N | -3.45790400 | 5.18603500 | -0.71326500 |

|    |             |             |             |   |             |             |             |
|----|-------------|-------------|-------------|---|-------------|-------------|-------------|
| C  | -1.60486700 | 4.05770400  | -0.95629300 | C | 0.93937200  | -5.36925700 | -1.18298300 |
| C  | -3.34589900 | 4.30528600  | 0.31034000  | C | -0.33248700 | -5.51164500 | -0.34813000 |
| N  | -2.22767900 | 3.60943100  | 0.19213100  | O | -1.46306900 | -5.32456900 | -0.79860100 |
| C  | 2.05056000  | 4.12651300  | -3.62351100 | N | -0.12661800 | -5.88105700 | 0.94160200  |
| C  | 1.69101400  | 2.98305800  | -2.67546000 | N | 1.94219400  | -3.86064600 | -4.44067200 |
| O  | 2.48880600  | 2.68053400  | -1.75330900 | C | 2.79309100  | -2.86436100 | -5.08373700 |
| O  | 0.54488700  | 2.44298500  | -2.88498200 | H | 6.31325000  | -3.83026800 | 3.15336600  |
| Zn | 2.11872000  | 2.66287000  | 0.41134500  | H | 6.02525900  | -4.93994500 | 1.82910100  |
| Zn | -1.50375400 | 2.12432100  | 1.41116500  | H | 3.89522900  | -3.55047900 | 3.52196000  |
| H  | 3.28326900  | 8.47424000  | -1.48904800 | H | 5.03946500  | -2.03827800 | 1.93800400  |
| H  | 4.69687600  | 8.26188100  | -0.44409200 | H | 3.41976500  | -2.39907700 | 1.31001600  |
| H  | 3.67595700  | 4.71273800  | -1.34291900 | H | 4.83804900  | -3.20315300 | 0.61919800  |
| H  | 2.31118700  | 7.74605400  | 1.21817200  | H | 2.22603400  | -4.46949300 | 2.02832800  |
| H  | 1.36261900  | 5.53565700  | 2.05635800  | H | 3.45655100  | -5.42140600 | 1.13825800  |
| H  | 7.50424900  | 0.88828400  | -1.03684900 | H | 3.07057500  | -5.80475000 | 2.82874900  |
| H  | 7.61387400  | -0.32431500 | 0.24201000  | H | 5.13646800  | -6.66561400 | 3.40957400  |
| H  | 4.80480500  | 1.78207800  | -1.21003400 | H | 5.71195900  | -1.04866400 | -1.88064400 |
| H  | 6.25837400  | 0.76823900  | 2.60039700  | H | 4.77974900  | -1.47528400 | -3.31708200 |
| H  | 3.85970300  | 1.59167500  | 2.86975700  | H | 4.80864600  | -3.67698700 | -2.22948800 |
| H  | -2.79441300 | 3.31995000  | 4.47426500  | H | 7.84397200  | -1.08966000 | -3.27411700 |
| H  | -5.98603700 | 1.20112900  | 4.23236000  | H | 1.62847500  | -4.69607600 | -0.66033400 |
| H  | -5.59526800 | -0.59807600 | 2.45244000  | H | 1.44144500  | -6.34410400 | -1.22221300 |
| H  | -3.56229600 | -0.08647100 | 1.01179200  | H | 0.80116700  | -5.85400900 | 1.34137200  |
| H  | -1.25121500 | 5.46912900  | -3.30160700 | H | -0.90673000 | -5.81386300 | 1.58419000  |
| H  | -2.98194700 | 5.77557300  | -3.46906300 | H | -0.20284700 | -4.17977800 | -2.57185800 |
| H  | -0.68892500 | 3.60877900  | -1.30325600 | H | 3.84548700  | -3.06113000 | -4.86132700 |
| H  | -4.22732100 | 5.82638500  | -0.85510400 | H | 2.52892500  | -1.86041900 | -4.73604300 |
| H  | -4.08413300 | 4.18816400  | 1.08865800  | H | 1.25050700  | -4.33235600 | -5.00582700 |
| H  | -0.79026400 | 5.07184600  | 4.15863600  | H | 0.46145000  | -5.62791800 | -3.29587100 |
| H  | 1.48591300  | 4.05387600  | -4.55491200 | H | 2.64259700  | -2.92504000 | -6.16329400 |
| H  | 1.80877100  | 5.07843300  | -3.13634800 | H | 6.87711000  | -1.46074800 | -4.70774100 |
| H  | 8.20101000  | 1.32425900  | 0.52827700  | H | 6.67811200  | 0.09863100  | -3.88513800 |
| H  | -3.93802200 | 4.23203300  | 3.48779000  | H | 5.28957300  | -5.53405400 | 4.76122200  |
| H  | -4.49972600 | 3.43366500  | 4.96279900  | H | 6.73428500  | -6.11787500 | 3.92169900  |
| H  | 0.39809800  | 5.44666200  | 5.42155600  | C | -4.84700900 | -5.05169200 | 6.13102300  |
| H  | -0.47200400 | 3.89622100  | 5.44441000  | C | -3.33898700 | -4.88620900 | 5.88520300  |
| H  | 4.53756600  | 7.30558700  | -1.92143000 | C | -3.01013000 | -4.14598700 | 4.60517100  |
| H  | 3.12329500  | 4.11913300  | -3.83345300 | C | -2.53321200 | -2.83158900 | 4.62097200  |
| H  | -1.97061400 | 6.90989000  | -2.55974500 | C | -3.17537800 | -4.75959800 | 3.35294300  |
| H  | 1.99467000  | 4.09633600  | 4.34648600  | C | -2.20235900 | -2.15353000 | 3.44545300  |
| C  | 5.69623100  | -5.79860400 | 3.77668000  | C | -2.85391000 | -4.10176000 | 2.16800600  |
| C  | 5.62689100  | -4.61540300 | 2.80248700  | C | -2.34028500 | -2.79694700 | 2.21211200  |
| C  | 4.25004800  | -3.97751100 | 2.57281200  | O | -1.98110800 | -2.22426000 | 1.02354900  |
| C  | 4.39149300  | -2.83646000 | 1.55291900  | H | -2.87238000 | -5.88032400 | 5.86322100  |
| C  | 3.18900600  | -4.98527100 | 2.11099300  | H | -2.88952800 | -4.35776900 | 6.73505300  |
| C  | 6.85306800  | -0.97321500 | -3.72809000 | H | -2.39054200 | -2.32858000 | 5.57524900  |
| C  | 5.75991300  | -1.56750400 | -2.84347500 | H | -3.55785400 | -5.77771500 | 3.30357100  |
| S  | 6.08352100  | -3.36271000 | -2.54769000 | H | -1.79453100 | -1.14741000 | 3.48777300  |
| C  | 0.68632300  | -4.82269300 | -2.58771600 | H | -2.96483200 | -4.58755600 | 1.20261100  |
| C  | 1.84057300  | -3.96560500 | -3.09881700 | H | -1.66854800 | -1.28365000 | 1.11230400  |
| O  | 2.61520600  | -3.36378600 | -2.33729300 | H | -5.34234000 | -4.07647700 | 6.20630900  |

|   |             |             |             |   |             |             |             |
|---|-------------|-------------|-------------|---|-------------|-------------|-------------|
| H | -5.32404900 | -5.60299400 | 5.31263300  | H | -4.57239500 | 2.06871300  | -1.88454700 |
| H | -5.03641900 | -5.60071400 | 7.06058000  | H | -5.61646300 | 1.29086600  | -0.69575800 |
| N | -0.29453300 | 0.33956200  | -1.43976000 | H | -6.42586800 | 2.60617100  | -3.32537000 |
| C | 0.43358500  | -0.80322900 | -1.89778300 | H | -7.32874400 | 2.58018900  | -1.80729500 |
| O | 0.21855300  | -1.36752800 | -2.96421700 | H | -8.12269700 | 0.89564700  | -3.78830200 |
| N | 1.38724100  | -1.09826800 | -0.99109500 | H | -7.98472000 | 0.24710100  | -2.14708200 |
| C | 0.02592300  | 0.56377000  | 0.08035400  | H | -6.55979300 | -1.27027100 | -3.27726300 |
| O | -1.06119100 | 0.30140200  | 0.83677300  | H | -5.43388900 | 1.05029200  | -4.95845300 |
| H | -1.31466900 | 0.22831800  | -1.57923200 | H | -4.98700200 | -0.66703500 | -5.11910500 |
| H | 1.97909600  | -1.91364900 | -1.16746000 | H | -6.61587200 | -0.14019800 | -5.53125900 |
| O | 0.38061500  | 1.88120900  | 0.21048800  | H | -4.63235800 | -2.18504600 | -3.50574300 |
| H | 0.18319500  | 1.42848400  | -2.15833200 | H | -2.83563000 | -4.70961100 | -1.89993400 |
| C | -1.23084200 | -2.13137500 | -5.56536800 | H | -4.66221200 | -2.97024400 | -1.14346700 |
| C | -2.62233500 | -2.11244800 | -4.96643400 | H | -2.91026200 | -2.75233900 | -1.04986000 |
| O | -3.63480000 | -2.32162700 | -5.62998000 | H | -1.73419100 | -1.69366000 | -3.18018800 |
| N | -2.63205000 | -1.83656800 | -3.63176000 | H | -1.31710800 | -2.07705600 | -6.65239800 |
| C | -3.83084400 | -1.90519700 | -2.82394000 | H | -0.61072600 | -1.31790700 | -5.18567500 |
| C | -4.06493900 | -0.53505100 | -2.17838700 | H | -0.73262000 | -3.07039100 | -5.29979900 |
| O | -3.19738700 | -0.04947400 | -1.42282000 | C | 1.20909300  | -0.48851500 | 0.31558900  |
| C | -3.72886300 | -2.99334500 | -1.73514600 | C | 1.28637200  | -1.52585800 | 2.63179700  |
| O | -3.55976500 | -4.24520900 | -2.35656900 | O | 1.08729900  | -2.51476900 | 3.32900500  |
| N | -5.21929100 | 0.12205700  | -2.40598400 | N | 0.95140200  | -1.51927200 | 1.28883100  |
| C | -6.27098900 | -0.22233300 | -3.39906800 | N | 1.92413200  | -0.39186700 | 3.11334800  |
| C | -5.78608100 | 0.01969800  | -4.83199300 | H | 2.11164600  | 0.03751700  | 0.63107200  |
| C | -7.42309100 | 0.70648400  | -2.96958800 | H | 0.24295800  | -2.20640300 | 1.05203700  |
| C | -6.70857800 | 1.97517300  | -2.47570200 | H | 1.62945500  | 0.52695000  | 2.78626000  |
| C | -5.45493700 | 1.43203100  | -1.77250100 | H | 2.02801200  | -0.44869100 | 4.11923200  |

### **SkDHPase.ALN-EP-II**

|   |             |             |             |    |             |             |             |
|---|-------------|-------------|-------------|----|-------------|-------------|-------------|
| C | -5.95657800 | -6.49363600 | -1.33397500 | N  | 4.86066300  | -1.84588600 | 2.65501300  |
| C | -5.01922400 | -5.66085000 | -0.53042800 | C  | 0.45567600  | -6.22765200 | -2.94992800 |
| N | -4.37242400 | -6.08852300 | 0.62074400  | C  | 0.95347000  | -5.53308400 | -1.72870400 |
| C | -4.57403100 | -4.38438400 | -0.72203000 | N  | 1.97996400  | -6.01342500 | -0.92694400 |
| C | -3.57935100 | -5.08547400 | 1.07164500  | C  | 0.55741700  | -4.36523200 | -1.13417700 |
| N | -3.67296700 | -4.03618100 | 0.26980200  | C  | 2.17054000  | -5.15059300 | 0.09621400  |
| C | -7.44820600 | 1.11891600  | 0.01261300  | N  | 1.31567300  | -4.14162800 | 0.00061500  |
| C | -6.21858000 | 0.40144100  | 0.45736800  | C  | -3.12086400 | -3.44434900 | -3.74865000 |
| N | -5.80086300 | 0.38041300  | 1.78118100  | C  | -2.44658400 | -2.57526300 | -2.69594500 |
| C | -5.28511600 | -0.34523600 | -0.21134700 | O  | -3.22525400 | -2.08767600 | -1.78883700 |
| C | -4.66992100 | -0.35119000 | 1.87391600  | O  | -1.21136500 | -2.43956400 | -2.75274800 |
| N | -4.32901500 | -0.80803900 | 0.67881000  | Zn | -2.87290600 | -2.12728900 | 0.18688000  |
| C | -1.36481400 | -4.75154800 | 4.65136400  | Zn | 1.02638100  | -2.70692500 | 1.37608200  |
| N | -2.13795900 | -3.84388800 | 3.82699600  | H  | -5.47074600 | -7.39477200 | -1.72851400 |
| C | -1.53451400 | -3.00732000 | 2.91860800  | H  | -6.82894400 | -6.81516300 | -0.75158800 |
| O | -0.29153200 | -3.23935400 | 2.71154700  | H  | -4.81647700 | -3.68875500 | -1.50700800 |
| O | -2.25976600 | -2.12467400 | 2.36630100  | H  | -4.47565100 | -6.99432100 | 1.05768500  |
| C | 2.67063600  | -4.46280300 | 4.01993400  | H  | -2.98610500 | -5.13953600 | 1.97282800  |
| C | 3.40157200  | -3.34787600 | 3.33366500  | H  | -7.60314400 | 0.96318900  | -1.05774700 |
| N | 2.86870400  | -2.65726600 | 2.24819400  | H  | -7.37167700 | 2.19965200  | 0.18251100  |
| C | 4.64538300  | -2.83667200 | 3.59436400  | H  | -5.21669800 | -0.58457600 | -1.26132900 |
| C | 3.77471200  | -1.76224500 | 1.86142400  | H  | -6.24172400 | 0.87399200  | 2.54557000  |

|   |             |             |             |   |             |             |             |
|---|-------------|-------------|-------------|---|-------------|-------------|-------------|
| H | -4.12111500 | -0.51938700 | 2.78520700  | H | -3.77074500 | 4.76666200  | -2.09086400 |
| H | 1.66309400  | -4.14813500 | 4.30726000  | H | -7.35604000 | 3.08381000  | -3.24957900 |
| H | 5.37594300  | -3.08274100 | 4.34920100  | H | -0.30224600 | 4.61104400  | -0.46047100 |
| H | 5.66752400  | -1.23949800 | 2.59602900  | H | -0.29154100 | 6.32779700  | -0.78036900 |
| H | 3.69815300  | -1.09485600 | 1.00746600  | H | 0.62894000  | 6.12706300  | 1.49367700  |
| H | -0.27350100 | -5.58564000 | -3.45027000 | H | 2.32845400  | 5.90371900  | 1.65158500  |
| H | 1.26255500  | -6.43419200 | -3.66343100 | H | 1.24010100  | 4.39818300  | -2.57925700 |
| H | -0.18116400 | -3.65451300 | -1.47966800 | H | -2.96533900 | 3.99557000  | -4.79508000 |
| H | 2.51458600  | -6.85612300 | -1.08946200 | H | -2.01081800 | 2.50171400  | -4.62589800 |
| H | 2.92229600  | -5.27487900 | 0.86063100  | H | -0.15364800 | 4.62096400  | -4.85447000 |
| H | -0.74999500 | -5.39699400 | 4.02069900  | H | 0.60481300  | 5.98127400  | -3.01666500 |
| H | -2.50187100 | -3.51075500 | -4.64598600 | H | -1.79040700 | 3.54664800  | -6.05219500 |
| H | -3.25400100 | -4.45549600 | -3.34338100 | H | -6.29359200 | 3.25617800  | -4.65268000 |
| H | -8.34115500 | 0.75646200  | 0.53647900  | H | -6.51678200 | 1.66404800  | -3.90149500 |
| H | 2.56515100  | -5.33995500 | 3.36852800  | H | -3.75231500 | 6.46429800  | 4.92518700  |
| H | 3.20949300  | -4.77908000 | 4.91722500  | H | -5.05256900 | 7.39309800  | 4.16359700  |
| H | -2.05238200 | -5.37701700 | 5.22755600  | C | 5.83188100  | 3.29261000  | 6.32251700  |
| H | -0.70274600 | -4.22690900 | 5.35266000  | C | 4.42565300  | 3.80013900  | 5.97002900  |
| H | -6.32178300 | -5.91374400 | -2.18501100 | C | 3.90696600  | 3.22996600  | 4.66844000  |
| H | -4.11182800 | -3.05994000 | -4.00891000 | C | 3.23231900  | 2.00490500  | 4.63415000  |
| H | -0.03232100 | -7.18123500 | -2.71201700 | C | 4.11527100  | 3.89347900  | 3.45036500  |
| H | -3.03456600 | -3.52425400 | 4.16646300  | C | 2.75574700  | 1.46694500  | 3.43856000  |
| C | -4.11970000 | 6.85307900  | 3.96671800  | C | 3.64664300  | 3.37590700  | 2.24515800  |
| C | -4.35207600 | 5.72420000  | 2.95406200  | C | 2.94420400  | 2.16598900  | 2.24324600  |
| C | -3.16150500 | 4.80278100  | 2.65459100  | O | 2.44244300  | 1.73241800  | 1.04321700  |
| C | -3.59181000 | 3.75552800  | 1.61617400  | H | 4.44257600  | 4.89565100  | 5.91107700  |
| C | -1.92039900 | 5.56640000  | 2.17286100  | H | 3.73545400  | 3.54633600  | 6.78489900  |
| C | -6.41694500 | 2.73750900  | -3.69676400 | H | 3.05288300  | 1.46806100  | 5.56377200  |
| C | -5.22913300 | 2.99504900  | -2.77284300 | H | 4.65424000  | 4.83941600  | 3.44661300  |
| S | -5.08775700 | 4.79854600  | -2.39354300 | H | 2.19522200  | 0.53509700  | 3.43846200  |
| C | 0.39727200  | 5.07975500  | -2.42721700 | H | 3.79443600  | 3.89933700  | 1.30472900  |
| C | -0.85948800 | 4.39088600  | -2.95823300 | H | 2.06880000  | 0.83264500  | 1.12018400  |
| O | -1.75013500 | 3.93738000  | -2.22541700 | H | 5.84142600  | 2.20061000  | 6.42185700  |
| C | 0.27878800  | 5.40567200  | -0.94297100 | H | 6.55335400  | 3.56070300  | 5.54217400  |
| C | 1.61300400  | 5.50383700  | -0.21190200 | H | 6.18245600  | 3.72068600  | 7.26891800  |
| O | 2.69196900  | 5.14430500  | -0.68486900 | N | 0.48123400  | -0.23208200 | -2.07850400 |
| N | 1.52833800  | 6.02227500  | 1.04394900  | C | 0.09616900  | 1.03914000  | -1.81700600 |
| N | -0.93614200 | 4.29211000  | -4.30673800 | O | 0.67515600  | 2.04305900  | -2.25112100 |
| C | -1.98825400 | 3.53853900  | -4.97842900 | N | -1.04553700 | 1.16451400  | -1.00566600 |
| H | -5.18663400 | 5.10092700  | 3.30876000  | C | -0.31053400 | -0.67307600 | 0.48939500  |
| H | -4.69660900 | 6.16621100  | 2.00688900  | O | 0.82687800  | -0.72990700 | 1.05272600  |
| H | -2.87999100 | 4.27885700  | 3.57971700  | H | 1.33831900  | -0.32811100 | -2.61001800 |
| H | -4.42915300 | 3.15165000  | 1.99081100  | H | -1.39936600 | 2.12141500  | -1.07007700 |
| H | -2.77249400 | 3.07775900  | 1.36355600  | O | -0.89713600 | -1.72811500 | 0.11377500  |
| H | -3.92368100 | 4.23980800  | 0.68884400  | H | -0.20768500 | -0.98891700 | -2.15694200 |
| H | -1.09218900 | 4.86275400  | 2.03679200  | C | 1.70790800  | 1.79082600  | -5.47358100 |
| H | -2.11969500 | 6.07833000  | 1.22161200  | C | 3.06377300  | 1.40452400  | -4.89767200 |
| H | -1.60418400 | 6.31902800  | 2.90444800  | O | 4.04409800  | 1.24586600  | -5.61888800 |
| H | -3.38943200 | 7.58478500  | 3.60471400  | N | 3.07731800  | 1.20193300  | -3.53939700 |
| H | -5.33665000 | 2.43956500  | -1.83573200 | C | 4.33774300  | 1.20355500  | -2.80064500 |
| H | -4.29322800 | 2.67654400  | -3.23718900 | C | 4.50341300  | -0.09644900 | -1.98968700 |

|   |            |             |             |   |             |             |             |
|---|------------|-------------|-------------|---|-------------|-------------|-------------|
| O | 3.79713300 | -0.30276600 | -0.98774300 | H | 6.21640900  | -1.60519500 | -5.65011200 |
| C | 4.37052000 | 2.40266400  | -1.83115000 | H | 5.12779500  | 1.31621500  | -3.54379100 |
| O | 4.14412700 | 3.58536900  | -2.56809500 | H | 3.66631000  | 4.20577300  | -1.98526700 |
| N | 5.45157100 | -0.99471700 | -2.35490300 | H | 5.35692700  | 2.41570300  | -1.33423700 |
| C | 6.30518700 | -1.01299700 | -3.57064600 | H | 3.61251200  | 2.25023000  | -1.05579400 |
| C | 5.53136900 | -1.50198000 | -4.79999100 | H | 2.28213300  | 1.60336200  | -3.03622200 |
| C | 7.43783300 | -1.96360500 | -3.13956300 | H | 1.33056500  | 0.96319200  | -6.08489700 |
| C | 6.72172000 | -3.00993100 | -2.26965900 | H | 0.97056600  | 2.04106200  | -4.70840400 |
| C | 5.65607500 | -2.19111300 | -1.52208900 | H | 1.85820400  | 2.64206500  | -6.14493600 |
| H | 4.71224900 | -2.72928400 | -1.38127100 | C | -1.03643400 | 0.68431800  | 0.37165400  |
| H | 5.99960700 | -1.88239600 | -0.52566500 | C | -0.81173900 | 1.78827600  | 2.63078600  |
| H | 6.24654800 | -3.76801200 | -2.90194600 | O | -0.37278900 | 2.70319000  | 3.31540300  |
| H | 7.39767900 | -3.53098800 | -1.58497100 | N | -0.52399200 | 1.69043700  | 1.27853500  |
| H | 7.95796500 | -2.39906000 | -3.99733800 | N | -1.69183500 | 0.83902300  | 3.14577000  |
| H | 8.17571900 | -1.41592200 | -2.54098800 | H | -2.07123300 | 0.49096900  | 0.67058300  |
| H | 6.69506900 | -0.01032400 | -3.76251600 | H | 0.33177300  | 2.16796500  | 1.00746300  |
| H | 5.06988800 | -2.47922100 | -4.61456600 | H | -1.65120200 | -0.12548500 | 2.82425300  |
| H | 4.76337400 | -0.78314900 | -5.08988200 | H | -1.75076900 | 0.92674400  | 4.15301600  |

#### L72F *SkDHPase*.DHU-ES-II

|   |             |             |             |    |             |             |             |
|---|-------------|-------------|-------------|----|-------------|-------------|-------------|
| C | -8.94325400 | -0.22292400 | -1.99904900 | C  | -3.60711100 | 0.03814600  | -2.85225200 |
| C | -7.79232600 | -0.30015700 | -1.05821800 | O  | -3.92054000 | 0.92811300  | -1.97962200 |
| N | -7.78151400 | -1.02889100 | 0.12305500  | O  | -2.61450900 | -0.71902800 | -2.78249200 |
| C | -6.54757700 | 0.25540200  | -1.13305200 | Zn | -3.79552600 | 0.50790000  | 0.09547300  |
| C | -6.56112300 | -0.89353000 | 0.70201900  | Zn | -1.76402900 | -2.21502300 | 1.17101100  |
| N | -5.78488500 | -0.12488800 | -0.04404600 | N  | 0.99558600  | -0.12361000 | -0.42751700 |
| C | -4.62359000 | 6.11668400  | -0.22729300 | C  | 1.37019200  | 1.05358900  | -1.11470600 |
| C | -4.30894700 | 4.73242100  | 0.24833300  | O  | 2.15455300  | 0.97315200  | -2.06220400 |
| N | -3.98709900 | 4.44347900  | 1.56796600  | N  | 0.83495400  | 2.19486500  | -0.65854400 |
| C | -4.24301900 | 3.52069200  | -0.39174600 | C  | -0.25389100 | 2.24187500  | 0.31354200  |
| C | -3.74853600 | 3.11462600  | 1.68000100  | C  | -0.08071600 | 1.13624400  | 1.35566900  |
| N | -3.89151900 | 2.52732000  | 0.50450400  | C  | 0.30305300  | -0.17939800 | 0.73516500  |
| C | -5.06823900 | -2.35627600 | 4.35520600  | O  | 0.10373800  | -1.28023300 | 1.28339500  |
| N | -4.90012600 | -1.14052600 | 3.58396000  | H  | -9.21498600 | -1.20750400 | -2.40052100 |
| C | -3.79416000 | -0.94030000 | 2.78272200  | H  | -9.83959100 | 0.20010700  | -1.52790400 |
| O | -3.03851900 | -1.96324000 | 2.63258500  | H  | -6.12542400 | 0.88693200  | -1.89572800 |
| O | -3.65559800 | 0.20040500  | 2.25447600  | H  | -8.55028000 | -1.56856900 | 0.49608900  |
| C | -2.02104100 | -5.06668200 | 3.98747000  | H  | -6.28496600 | -1.33474700 | 1.64955800  |
| C | -0.71278700 | -4.79754300 | 3.30850200  | H  | -4.94463700 | 6.08541100  | -1.27157300 |
| N | -0.53291000 | -3.86426200 | 2.28719300  | H  | -3.74870000 | 6.77498000  | -0.16528300 |
| C | 0.48675200  | -5.40986400 | 3.57018100  | H  | -4.41561400 | 3.27649800  | -1.42850200 |
| C | 0.74656100  | -3.93388000 | 1.94847200  | H  | -3.92572000 | 5.11549000  | 2.32040900  |
| N | 1.39880300  | -4.85408700 | 2.69659000  | H  | -3.49937400 | 2.60597100  | 2.59859000  |
| C | -4.18431400 | -4.66063600 | -3.20662700 | H  | -2.46531800 | -4.13682700 | 4.35529200  |
| C | -3.44664800 | -4.51330300 | -1.92393300 | H  | 0.76158200  | -6.16658700 | 4.28891700  |
| N | -3.09627100 | -5.54539200 | -1.06384000 | H  | 2.39115000  | -5.04033700 | 2.66219700  |
| C | -2.97531600 | -3.38232400 | -1.32455400 | H  | 1.23251900  | -3.34311500 | 1.18689600  |
| C | -2.43975700 | -5.01269300 | -0.00275800 | H  | -4.23663300 | -3.68496500 | -3.69571600 |
| N | -2.35335800 | -3.69813900 | -0.13329500 | H  | -3.68589000 | -5.35226600 | -3.89758000 |
| C | -4.57786400 | -0.14950500 | -4.02587600 | H  | -3.01717500 | -2.37584400 | -1.70783500 |

|   |             |             |             |   |            |             |             |
|---|-------------|-------------|-------------|---|------------|-------------|-------------|
| H | -3.28799700 | -6.52842700 | -1.20044400 | C | 4.74322800 | -0.74019800 | 6.55343000  |
| H | -2.04534800 | -5.59263000 | 0.81703500  | C | 4.51838700 | -0.66953400 | 5.05637000  |
| H | -4.97660200 | -3.22386800 | 3.69917500  | C | 3.43397600 | -1.32129400 | 4.45454700  |
| H | -4.07332800 | -0.62719900 | -4.86881400 | C | 5.39711500 | 0.03158300  | 4.21736000  |
| H | -5.39976300 | -0.79873300 | -3.69849800 | C | 3.22449300 | -1.27762200 | 3.07547800  |
| H | -1.21607400 | 2.13590500  | -0.19782800 | C | 5.20821300 | 0.08019800  | 2.83653500  |
| H | -0.23001500 | 3.22207100  | 0.79198300  | C | 4.11634700 | -0.57516100 | 2.25651400  |
| H | -0.99749800 | 0.98609200  | 1.92870900  | O | 3.93986300 | -0.44984400 | 0.90353000  |
| H | 0.72865900  | 1.39565900  | 2.05301900  | H | 5.28500100 | 0.15513300  | 6.88336900  |
| H | -5.43432100 | 6.57153600  | 0.35485100  | H | 3.77450400 | -0.72137000 | 7.06990200  |
| H | -2.75037900 | -5.52074000 | 3.30413300  | H | 2.72250500 | -1.86051600 | 5.07758900  |
| H | -1.87925400 | -5.74984800 | 4.82958300  | H | 6.25126600 | 0.54708300  | 4.65185200  |
| H | -6.06664600 | -2.35641500 | 4.80292500  | H | 2.34655500 | -1.74549400 | 2.64046300  |
| H | -4.32710700 | -2.45889300 | 5.15969000  | H | 5.90135800 | 0.61336200  | 2.19234700  |
| H | -8.67997000 | 0.41814200  | -2.84401600 | H | 3.49279200 | -1.23159600 | 0.51457300  |
| H | -5.01302100 | 0.80346300  | -4.34211800 | H | 4.99079900 | -2.90693600 | 6.71792500  |
| H | -5.20985200 | -5.02373300 | -3.05975600 | H | 6.51232600 | -2.02457800 | 6.53003300  |
| H | -5.33590700 | -0.29184200 | 3.91752700  | H | 5.66120800 | -1.99917700 | 8.08649000  |
| H | 1.41449100  | -0.99070500 | -0.77084500 | C | 2.70367200 | 0.01230500  | -5.13402300 |
| H | 1.11537500  | 3.03574100  | -1.16240300 | C | 3.45430100 | -1.19857000 | -4.61688000 |
| O | -2.26329000 | -0.67645300 | -0.03146900 | O | 3.91633700 | -2.04535600 | -5.37889600 |
| H | -2.11279300 | -0.74142700 | -1.00162200 | N | 3.54473800 | -1.27233000 | -3.25920300 |
| C | -2.41302700 | 6.50775700  | -3.74911500 | C | 4.33626300 | -2.29309100 | -2.60217500 |
| C | -1.99078000 | 5.27145100  | -2.95927800 | C | 3.39675400 | -3.11401400 | -1.71030500 |
| S | -0.96773300 | 5.62608600  | -1.46109700 | O | 2.84537800 | -2.58036700 | -0.71129100 |
| C | 4.61140000  | 3.69855400  | -2.72865000 | C | 5.51139300 | -1.68373300 | -1.80627100 |
| C | 3.13174000  | 3.92585300  | -3.03021400 | O | 6.31033300 | -0.94835800 | -2.70210200 |
| O | 2.34373800  | 4.29040600  | -2.14534600 | N | 3.13255800 | -4.39574700 | -2.02271600 |
| C | 4.82930600  | 2.46938200  | -1.81531800 | C | 3.68044400 | -5.22267200 | -3.14185500 |
| C | 6.20782500  | 2.40024600  | -1.16952500 | C | 2.91269500 | -5.02916100 | -4.45943300 |
| O | 6.99126000  | 1.47163800  | -1.36340600 | C | 3.54206200 | -6.64446800 | -2.56446200 |
| N | 6.53328200  | 3.43774000  | -0.34725700 | C | 2.22500000 | -6.58789100 | -1.77467700 |
| N | 2.72884200  | 3.73737700  | -4.30600800 | C | 2.24070600 | -5.18438500 | -1.15009100 |
| C | 1.33241900  | 3.87071400  | -4.70589400 | H | 1.25117800 | -4.72061000 | -1.09196400 |
| H | -2.86372200 | 4.74148300  | -2.57043000 | H | 2.65582300 | -5.19183700 | -0.13524200 |
| H | -1.44745300 | 4.55851900  | -3.58529500 | H | 1.37000700 | -6.69607500 | -2.45047800 |
| H | 0.23213000  | 5.72141000  | -2.07232100 | H | 2.14673300 | -7.37272500 | -1.01670000 |
| H | -2.97047800 | 7.20857300  | -3.11970900 | H | 3.54231800 | -7.40539900 | -3.34957400 |
| H | 4.69833800  | 1.54631800  | -2.38025100 | H | 4.37944300 | -6.85684100 | -1.88881600 |
| H | 4.07348600  | 2.47439700  | -1.02321800 | H | 4.73212800 | -4.96870400 | -3.29258400 |
| H | 5.84100300  | 4.09731700  | -0.02180700 | H | 1.84316300 | -5.23068800 | -4.33012000 |
| H | 7.40217700  | 3.37511700  | 0.16638500  | H | 3.04428700 | -4.01692400 | -4.84934600 |
| H | 5.19933400  | 3.59002200  | -3.64706800 | H | 3.30393400 | -5.72820000 | -5.20747600 |
| H | 0.97899700  | 4.89010100  | -4.52255900 | H | 4.75401100 | -2.89652500 | -3.40741700 |
| H | 0.70243800  | 3.17041100  | -4.14806400 | H | 6.61067300 | -0.13175600 | -2.25323900 |
| H | 3.39290400  | 3.38368200  | -4.97924300 | H | 6.07803600 | -2.51304800 | -1.34551800 |
| H | 4.96098800  | 4.60960500  | -2.23082900 | H | 5.13107600 | -1.05905200 | -0.99160500 |
| H | 1.25268300  | 3.65415200  | -5.77256900 | H | 3.14277000 | -0.52251300 | -2.69941000 |
| H | -1.54541500 | 7.04187200  | -4.15107600 | H | 1.83066600 | -0.33117700 | -5.69964100 |
| H | -3.05229600 | 6.21788400  | -4.59283600 | H | 2.37882800 | 0.69359200  | -4.34659100 |
| C | 5.52272500  | -1.99063700 | 6.99933200  | H | 3.35381700 | 0.53687300  | -5.84312700 |

|   |             |            |            |   |            |            |            |
|---|-------------|------------|------------|---|------------|------------|------------|
| C | 1.42284500  | 7.64667800 | 4.31818500 | C | 2.61949300 | 4.43719000 | 1.35665800 |
| H | 2.28920100  | 7.47899100 | 4.96740300 | C | 2.96005800 | 3.31347900 | 3.46965500 |
| C | 0.67469200  | 6.32990100 | 4.04988000 | H | 1.94842600 | 4.17379300 | 5.16550100 |
| H | 0.29615800  | 5.92882600 | 4.99849500 | H | 2.77868800 | 4.50822100 | 0.28351000 |
| H | -0.20424600 | 6.54083400 | 3.42527600 | C | 3.20217300 | 3.40330800 | 2.09698800 |
| C | 1.54120500  | 5.29085800 | 3.36913700 | H | 3.40999100 | 2.51004600 | 4.04680400 |
| C | 1.79729000  | 5.36933200 | 1.99233600 | H | 3.82992600 | 2.66054100 | 1.61130300 |
| C | 2.13534900  | 4.25099200 | 4.09625800 | H | 0.76836800 | 8.37793900 | 4.80620200 |
| H | 1.34355700  | 6.16941100 | 1.40997900 | H | 1.78823600 | 8.08863000 | 3.38469200 |

### L72F *SkDHPase*.DHU-TS1-II

|    |             |             |             |   |             |             |             |
|----|-------------|-------------|-------------|---|-------------|-------------|-------------|
| C  | -8.76666800 | 1.34644900  | -1.22411100 | C | -0.14195500 | 2.43017200  | -0.11525200 |
| C  | -7.54608600 | 0.92295600  | -0.48523800 | C | -0.08308700 | 1.38998200  | 0.99949300  |
| N  | -7.50574800 | -0.07518300 | 0.47936700  | C | -0.10516800 | -0.02017800 | 0.45925000  |
| C  | -6.25525800 | 1.35410800  | -0.59053500 | O | -0.04005500 | -1.01761700 | 1.28852500  |
| C  | -6.22529000 | -0.20579100 | 0.91031200  | H | -9.20423500 | 0.52411500  | -1.80408100 |
| N  | -5.44069800 | 0.64595400  | 0.27329900  | H | -9.54666100 | 1.73076800  | -0.55482600 |
| C  | -3.21330200 | 6.80460900  | -0.05886400 | H | -5.83926200 | 2.09693200  | -1.24990200 |
| C  | -3.21608200 | 5.39507500  | 0.43506000  | H | -8.29419700 | -0.61378100 | 0.81083200  |
| N  | -3.00647500 | 5.06061000  | 1.76599600  | H | -5.91338800 | -0.90741100 | 1.66873200  |
| C  | -3.38542900 | 4.19165900  | -0.19956200 | H | -3.48057800 | 6.82637400  | -1.11828800 |
| C  | -3.05105100 | 3.71327800  | 1.89037800  | H | -2.22458800 | 7.26827200  | 0.04479400  |
| N  | -3.27560000 | 3.15588700  | 0.71222500  | H | -3.56480200 | 3.98287000  | -1.24299200 |
| C  | -4.72902900 | -1.39341600 | 4.78705200  | H | -2.83085700 | 5.71328200  | 2.51774700  |
| N  | -4.44553300 | -0.23316800 | 3.96935100  | H | -2.92273100 | 3.17218800  | 2.81477000  |
| C  | -3.53089200 | -0.27770600 | 2.95217000  | H | -2.60985700 | -3.65107000 | 4.58907900  |
| O  | -3.12007100 | -1.44914500 | 2.63842900  | H | 0.41530300  | -5.94975400 | 4.43936200  |
| O  | -3.21649200 | 0.81639400  | 2.39278400  | H | 2.06371100  | -5.03868600 | 2.70241100  |
| C  | -2.27650900 | -4.62061700 | 4.20630300  | H | 0.99097500  | -3.31569400 | 1.18570800  |
| C  | -0.97524200 | -4.49162900 | 3.46941300  | H | -4.93768800 | -2.95769300 | -3.29658100 |
| N  | -0.75232100 | -3.61889700 | 2.40243000  | H | -4.78672300 | -4.71166200 | -3.45192000 |
| C  | 0.17666100  | -5.19705800 | 3.70385200  | H | -3.20373500 | -1.89100400 | -1.53924900 |
| C  | 0.50176900  | -3.81491400 | 2.01061100  | H | -4.36305600 | -5.84325300 | -0.74615100 |
| N  | 1.09477500  | -4.75969000 | 2.77073500  | H | -2.74798000 | -5.14048300 | 1.09412300  |
| C  | -5.03679400 | -3.90165900 | -2.75527300 | H | -4.97760500 | -2.24689500 | 4.15284900  |
| C  | -4.13765000 | -3.87508100 | -1.57145100 | H | -4.38009300 | -0.02015700 | -4.51089100 |
| N  | -3.94585300 | -4.92460100 | -0.68360600 | H | -5.58488900 | 0.15984100  | -3.21165600 |
| C  | -3.35788900 | -2.86160000 | -1.09291600 | H | -1.14333300 | 2.47992000  | -0.55301200 |
| C  | -3.08173100 | -4.51773800 | 0.27850100  | H | 0.10851400  | 3.41827500  | 0.27882600  |
| N  | -2.71175100 | -3.26591000 | 0.05792700  | H | -0.89406100 | 1.50405900  | 1.71900200  |
| C  | -4.68477400 | 0.59607500  | -3.66237300 | H | 0.86756400  | 1.48947100  | 1.53924300  |
| C  | -3.58234000 | 0.63861900  | -2.60201800 | H | -3.93759100 | 7.42726300  | 0.48031400  |
| O  | -3.64601500 | 1.58252000  | -1.73186500 | H | -3.07719300 | -5.00242200 | 3.56005600  |
| O  | -2.72374100 | -0.27270700 | -2.60135600 | H | -2.16709900 | -5.31062400 | 5.04740800  |
| Zn | -3.41569600 | 1.13522100  | 0.31106500  | H | -5.58551600 | -1.17231900 | 5.43042900  |
| Zn | -1.76462200 | -2.00274000 | 1.34416500  | H | -3.88180500 | -1.67913600 | 5.42510500  |
| N  | 0.56168000  | -0.19221000 | -0.74137800 | H | -8.50818600 | 2.14473500  | -1.92405700 |
| C  | 1.15657000  | 0.83014900  | -1.47880300 | H | -4.94416300 | 1.60249900  | -4.00459800 |
| O  | 1.96836600  | 0.56345900  | -2.37748000 | H | -6.09069500 | -4.02305900 | -2.47328700 |
| N  | 0.82972500  | 2.09355400  | -1.14647300 | H | -4.66095200 | 0.68709600  | 4.32382700  |

|   |             |             |             |   |             |             |             |
|---|-------------|-------------|-------------|---|-------------|-------------|-------------|
| H | 0.85886900  | -1.14938100 | -0.97304400 | C | 2.35772200  | -0.59254800 | -5.46938700 |
| H | 1.36944400  | 2.81321600  | -1.62244900 | C | 2.79047700  | -1.91058200 | -4.84886400 |
| O | -1.95211300 | -0.19606700 | 0.00065300  | O | 3.21632800  | -2.83579500 | -5.53816700 |
| H | -1.98563600 | -0.28524300 | -0.99025300 | N | 2.62927500  | -1.96691000 | -3.50123600 |
| C | -1.33098500 | 6.74578700  | -3.78662800 | C | 3.10263700  | -3.07622700 | -2.69868500 |
| C | -0.60110700 | 5.75621300  | -2.88218800 | C | 1.90287200  | -3.69388600 | -1.96944900 |
| S | 0.86471800  | 6.54462900  | -2.06376700 | O | 1.27338400  | -3.02106900 | -1.12424400 |
| C | 4.72775300  | 2.14985400  | -3.00156700 | C | 4.16596100  | -2.61004300 | -1.68489800 |
| C | 3.46243100  | 2.94794300  | -3.32175100 | O | 5.25673200  | -2.09274600 | -2.40729300 |
| O | 2.91291400  | 3.68632500  | -2.48898700 | N | 1.53409400  | -4.96119700 | -2.24410300 |
| C | 4.96352400  | 2.04560700  | -1.48706900 | C | 2.13091800  | -5.90232700 | -3.23278700 |
| C | 6.27083400  | 1.34403300  | -1.14816700 | C | 1.71449200  | -5.57928600 | -4.67323200 |
| O | 6.38037100  | 0.11904500  | -1.07354800 | C | 1.59540700  | -7.25855900 | -2.73190800 |
| N | 7.34168300  | 2.15678700  | -0.94935700 | C | 0.19293200  | -6.92378200 | -2.19925100 |
| N | 3.00859500  | 2.84191000  | -4.58971200 | C | 0.38040700  | -5.54979400 | -1.53965400 |
| C | 1.75919800  | 3.45629500  | -5.02266500 | H | -0.49075600 | -4.89370200 | -1.62609000 |
| H | -1.27001500 | 5.37163100  | -2.10615700 | H | 0.61386600  | -5.63725600 | -0.47066400 |
| H | -0.24476500 | 4.90017400  | -3.45889900 | H | -0.52134300 | -6.85587600 | -3.02697100 |
| H | 1.72330100  | 5.51473300  | -2.23281000 | H | -0.18611700 | -7.67167700 | -1.49603100 |
| H | -1.66188100 | 7.62958000  | -3.22908300 | H | 1.58880000  | -8.01236700 | -3.52400800 |
| H | 4.15493500  | 1.45911700  | -1.04556800 | H | 2.22746000  | -7.63247800 | -1.91703800 |
| H | 4.93603300  | 3.04564500  | -1.04578100 | H | 3.22096100  | -5.86847400 | -3.15069200 |
| H | 7.25470000  | 3.16001800  | -0.89001900 | H | 0.62276500  | -5.56787700 | -4.77555900 |
| H | 8.22632100  | 1.73425200  | -0.70166800 | H | 2.11422700  | -4.61947600 | -5.00867500 |
| H | 4.65260200  | 1.14511500  | -3.43228200 | H | 2.10847300  | -6.35186400 | -5.34456800 |
| H | 1.75923400  | 4.51600000  | -4.75811000 | H | 3.57039900  | -3.77701900 | -3.38953500 |
| H | 0.89387900  | 2.96855700  | -4.55773200 | H | 5.62571200  | -1.33483200 | -1.91365600 |
| H | 3.40266700  | 2.11635900  | -5.17225200 | H | 4.46108000  | -3.47999600 | -1.06940000 |
| H | 5.57674700  | 2.64818800  | -3.48983800 | H | 3.72169800  | -1.87268600 | -1.00506800 |
| H | 1.68058700  | 3.36260400  | -6.10765000 | H | 2.35910400  | -1.11318900 | -3.01208000 |
| H | -0.68299000 | 7.09117400  | -4.59775000 | H | 1.56593600  | -0.79123500 | -6.19951900 |
| H | -2.21816700 | 6.27469800  | -4.22820400 | H | 2.00189800  | 0.13182800  | -4.73496200 |
| C | 5.96242700  | -2.94862900 | 6.38944800  | H | 3.20677400  | -0.18409200 | -6.03091400 |
| C | 5.67585500  | -1.46169500 | 6.12571000  | C | 3.44830100  | 7.26327400  | 3.85576900  |
| C | 4.88589200  | -1.26866000 | 4.85199400  | H | 4.33174900  | 6.83931800  | 4.34565300  |
| C | 3.48759700  | -1.33212700 | 4.85546100  | C | 2.26498700  | 6.28471400  | 3.92190400  |
| C | 5.53099200  | -1.11117500 | 3.61646900  | H | 1.99627000  | 6.10423500  | 4.97021800  |
| C | 2.75201800  | -1.25873000 | 3.67245500  | H | 1.38963400  | 6.74807600  | 3.44640600  |
| C | 4.81764400  | -1.03600800 | 2.42353600  | C | 2.59140500  | 4.97523700  | 3.23985100  |
| C | 3.42040900  | -1.11940100 | 2.44973700  | C | 2.60700900  | 4.89625400  | 1.84019400  |
| O | 2.75686800  | -1.04898600 | 1.25993000  | C | 2.95964500  | 3.84272500  | 3.97651700  |
| H | 6.62477000  | -0.91396700 | 6.06593200  | H | 2.32216900  | 5.76580600  | 1.25030300  |
| H | 5.12598700  | -1.04104500 | 6.97747900  | C | 2.99357500  | 3.72321300  | 1.19289800  |
| H | 2.96006300  | -1.44320600 | 5.80116700  | C | 3.34129900  | 2.66159900  | 3.33634200  |
| H | 6.61701500  | -1.05065800 | 3.58714200  | H | 2.95416500  | 3.88938600  | 5.06382900  |
| H | 1.66511800  | -1.29162900 | 3.69174400  | H | 3.00657100  | 3.68934000  | 0.10745000  |
| H | 5.32272200  | -0.90809200 | 1.46990200  | C | 3.36276100  | 2.60049300  | 1.94146500  |
| H | 1.78954800  | -1.12813300 | 1.40756900  | H | 3.62346600  | 1.79050300  | 3.92100100  |
| H | 5.02873100  | -3.51524700 | 6.48453000  | H | 3.65661500  | 1.67964900  | 1.44650000  |
| H | 6.53502800  | -3.38817000 | 5.56488800  | H | 3.20677100  | 8.21117700  | 4.35075500  |
| H | 6.53746100  | -3.08645300 | 7.31283400  | H | 3.71770500  | 7.48301100  | 2.81700600  |



**L72F S*k*DHPase.DHU-INT-II**

|    |             |             |             |   |             |             |             |
|----|-------------|-------------|-------------|---|-------------|-------------|-------------|
| C  | -8.68212400 | 1.68279000  | -1.22991900 | H | -5.87637300 | -0.86685500 | 1.46166800  |
| C  | -7.47610500 | 1.17739000  | -0.51997700 | H | -3.23108200 | 6.97206000  | -0.99972800 |
| N  | -7.45414900 | 0.09540000  | 0.35051900  | H | -1.94192800 | 7.34386600  | 0.15073200  |
| C  | -6.18070400 | 1.60222400  | -0.57527900 | H | -3.45573500 | 4.15729200  | -1.16245200 |
| C  | -6.17866600 | -0.08958100 | 0.77629400  | H | -2.56347600 | 5.77911400  | 2.61166600  |
| N  | -5.38057200 | 0.80810500  | 0.22467800  | H | -2.76846000 | 3.24125500  | 2.86812700  |
| C  | -2.95223300 | 6.92722900  | 0.05592500  | H | -2.79778900 | -3.60410000 | 4.33396000  |
| C  | -3.01351200 | 5.51670200  | 0.53428300  | H | 0.28225800  | -5.94746600 | 4.52309300  |
| N  | -2.79241200 | 5.14951100  | 1.85443400  | H | 2.00663200  | -5.06964200 | 2.84506300  |
| C  | -3.25298100 | 4.33645600  | -0.11790000 | H | 1.00220100  | -3.38362900 | 1.23375600  |
| C  | -2.89881400 | 3.80448300  | 1.95714400  | H | -4.98893100 | -2.70076900 | -3.36049600 |
| N  | -3.17586400 | 3.28222700  | 0.77417000  | H | -4.89463300 | -4.45250300 | -3.57143400 |
| C  | -4.75992000 | -1.30632700 | 4.73874400  | H | -3.21448200 | -1.76478500 | -1.52208600 |
| N  | -4.39289300 | -0.16916000 | 3.92094900  | H | -4.55106600 | -5.69815600 | -0.93188800 |
| C  | -3.53966000 | -0.26945800 | 2.85822600  | H | -2.93392800 | -5.15323100 | 0.95732400  |
| O  | -3.24694100 | -1.45923800 | 2.48557300  | H | -5.07579500 | -2.13635400 | 4.10333000  |
| O  | -3.16254500 | 0.81343500  | 2.31047100  | H | -4.33111200 | 0.21846700  | -4.51928100 |
| C  | -2.41543400 | -4.60269100 | 4.10288000  | H | -5.54385800 | 0.44512800  | -3.23323100 |
| C  | -1.06688300 | -4.51971900 | 3.45404100  | H | -0.97396200 | 2.71399300  | -0.51067600 |
| N  | -0.79259400 | -3.68038900 | 2.37746300  | H | 0.39131600  | 3.40144300  | 0.38155700  |
| C  | 0.07413100  | -5.21425500 | 3.75938900  | H | -0.84239200 | 1.57643800  | 1.70361800  |
| C  | 0.47958800  | -3.87599400 | 2.04376700  | H | 0.88256200  | 1.27143900  | 1.45817000  |
| N  | 1.03252200  | -4.79957100 | 2.85457400  | H | -3.63960000 | 7.57780900  | 0.61033900  |
| C  | -5.12575300 | -3.65783600 | -2.85133200 | H | -3.15316800 | -5.08953400 | 3.45175400  |
| C  | -4.23786700 | -3.70428400 | -1.65755500 | H | -2.36009800 | -5.18047000 | 5.02963500  |
| N  | -4.09996300 | -4.80065300 | -0.81807300 | H | -5.59418300 | -1.02238600 | 5.38622600  |
| C  | -3.42101400 | -2.74675200 | -1.12356500 | H | -3.93393100 | -1.65538400 | 5.37324600  |
| C  | -3.23105800 | -4.47760400 | 0.16976700  | H | -8.40450200 | 2.53591200  | -1.85365100 |
| N  | -2.80684100 | -3.23341100 | 0.01385200  | H | -4.82926900 | 1.86111300  | -4.00883000 |
| C  | -4.61936200 | 0.84201500  | -3.67063700 | H | -6.18564000 | -3.75267800 | -2.58247100 |
| C  | -3.53429900 | 0.83333800  | -2.59981800 | H | -4.53440700 | 0.76340900  | 4.28012100  |
| O  | -3.57481800 | 1.76207800  | -1.71517300 | H | 0.74406400  | -1.13533700 | -1.03606300 |
| O  | -2.70282800 | -0.10683400 | -2.60367600 | H | 1.56068600  | 2.77390200  | -1.55930400 |
| Zn | -3.36522400 | 1.30556200  | 0.31352900  | O | -1.81666400 | 0.04207300  | -0.16489000 |
| Zn | -1.76943400 | -2.15313300 | 1.38079800  | H | -1.88302700 | -0.03344700 | -1.17266500 |
| N  | 0.43383000  | -0.17273400 | -0.87522800 | C | -1.06002700 | 6.87636800  | -3.66694600 |
| C  | 1.18066100  | 0.80774400  | -1.48455900 | C | -0.34285800 | 5.85240000  | -2.79059200 |
| O  | 2.04944700  | 0.52953300  | -2.33546400 | S | 1.16937300  | 6.58568200  | -2.00900000 |
| N  | 0.93180800  | 2.09476900  | -1.13917000 | C | 4.81271900  | 2.01754900  | -2.94544900 |
| C  | 0.01089100  | 2.48828000  | -0.08501200 | C | 3.59872300  | 2.89398000  | -3.26164900 |
| C  | -0.08059500 | 1.37169200  | 0.94923300  | O | 3.10462000  | 3.66817400  | -2.42686100 |
| C  | -0.39220100 | 0.02366300  | 0.29757000  | C | 5.03223500  | 1.88953100  | -1.42983500 |
| O  | -0.25713800 | -1.01933600 | 1.15552300  | C | 6.31868800  | 1.15737400  | -1.07832500 |
| H  | -9.12495900 | 0.92180600  | -1.88471600 | O | 6.38841900  | -0.06490600 | -0.93531200 |
| H  | -9.46394800 | 2.01811900  | -0.53693400 | N | 7.42275000  | 1.94000600  | -0.94575100 |
| H  | -5.75587600 | 2.39709100  | -1.16432100 | N | 3.13400700  | 2.81910500  | -4.52894600 |
| H  | -8.25093700 | -0.46269200 | 0.62516000  | C | 1.92193500  | 3.50880600  | -4.95737300 |

|   |             |             |             |   |             |             |             |
|---|-------------|-------------|-------------|---|-------------|-------------|-------------|
| H | -1.00517200 | 5.48354500  | -2.00094500 | O | 5.11913700  | -2.08375100 | -2.41495900 |
| H | -0.03213800 | 4.99011700  | -3.38403400 | N | 1.41598300  | -4.99186700 | -2.33343800 |
| H | 1.96903400  | 5.50408900  | -2.14639500 | C | 1.99952000  | -5.90027600 | -3.35802500 |
| H | -1.34498200 | 7.76595800  | -3.09326200 | C | 1.57184900  | -5.52516200 | -4.78216000 |
| H | 4.20193500  | 1.32171300  | -1.00524400 | C | 1.46486600  | -7.27145700 | -2.89843000 |
| H | 5.02807700  | 2.88644600  | -0.98015800 | C | 0.07054700  | -6.95149300 | -2.33620700 |
| H | 7.37159900  | 2.94744000  | -0.93506800 | C | 0.27025400  | -5.59959300 | -1.63517800 |
| H | 8.29594700  | 1.49919100  | -0.68987100 | H | -0.60058300 | -4.93929100 | -1.69027100 |
| H | 4.67969600  | 1.02164500  | -3.38203700 | H | 0.51470900  | -5.72130200 | -0.57141700 |
| H | 1.98148000  | 4.56251800  | -4.67661700 | H | -0.65448900 | -6.85510900 | -3.15191300 |
| H | 1.02859900  | 3.06423700  | -4.50179900 | H | -0.30119100 | -7.72146100 | -1.65301700 |
| H | 3.46583000  | 2.05680000  | -5.10331700 | H | 1.44534700  | -7.99735900 | -3.71606600 |
| H | 5.69101100  | 2.47015500  | -3.42659600 | H | 2.10569600  | -7.67585500 | -2.10523600 |
| H | 1.84311300  | 3.43549200  | -6.04404900 | H | 3.09050600  | -5.87353300 | -3.28624100 |
| H | -0.42036500 | 7.20633500  | -4.49097100 | H | 0.47916900  | -5.49922900 | -4.87200600 |
| H | -1.97424900 | 6.44187100  | -4.09068500 | H | 1.98028400  | -4.55922700 | -5.08804200 |
| C | 5.86748900  | -3.25164900 | 6.34109600  | H | 1.95095400  | -6.27773400 | -5.48426300 |
| C | 5.35553500  | -1.80854400 | 6.19165000  | H | 3.46766100  | -3.78953300 | -3.42797900 |
| C | 4.56823200  | -1.59280600 | 4.91665500  | H | 5.54554800  | -1.40691200 | -1.85259400 |
| C | 3.16905600  | -1.58346300 | 4.91055700  | H | 4.33597100  | -3.50654600 | -1.10154700 |
| C | 5.22348100  | -1.43206300 | 3.68481000  | H | 3.57003600  | -1.91010300 | -1.02109900 |
| C | 2.44130700  | -1.42831600 | 3.72742600  | H | 2.29338600  | -1.11589000 | -3.03361400 |
| C | 4.51976400  | -1.27984100 | 2.49474400  | H | 1.63221200  | -0.70021900 | -6.26072000 |
| C | 3.11664400  | -1.28030600 | 2.50859200  | H | 2.01256900  | 0.16529300  | -4.74355800 |
| O | 2.47763500  | -1.12938300 | 1.31768900  | H | 3.27956600  | -0.15435800 | -5.97865900 |
| H | 6.21240000  | -1.12244600 | 6.21853300  | C | 3.70739800  | 7.08589300  | 3.99747500  |
| H | 4.73098200  | -1.55498000 | 7.05762800  | H | 4.56186100  | 6.61332900  | 4.49424400  |
| H | 2.63083800  | -1.69233000 | 5.85059600  | C | 2.47802600  | 6.16428100  | 4.03210600  |
| H | 6.31137800  | -1.42221800 | 3.65764900  | H | 2.18431300  | 5.98383600  | 5.07381200  |
| H | 1.35447300  | -1.39869400 | 3.74666200  | H | 1.63361900  | 6.67604700  | 3.54996700  |
| H | 5.03710200  | -1.14395000 | 1.54869000  | C | 2.75024000  | 4.84880300  | 3.33748000  |
| H | 1.49231500  | -1.12083300 | 1.41766000  | C | 2.79331300  | 4.78888200  | 1.93748100  |
| H | 5.03341600  | -3.96310400 | 6.36014600  | C | 3.03880000  | 3.68710900  | 4.06417000  |
| H | 6.51910600  | -3.52673400 | 5.50398000  | H | 2.57033100  | 5.68097100  | 1.35452200  |
| H | 6.43906600  | -3.37439900 | 7.26842300  | C | 3.12791300  | 3.60504300  | 1.28098000  |
| C | 2.38536000  | -0.54862100 | -5.48030000 | C | 3.36760000  | 2.49553300  | 3.41391200  |
| C | 2.74211400  | -1.89678100 | -4.87285500 | H | 3.01185200  | 3.71850700  | 5.15180400  |
| O | 3.16449600  | -2.81983600 | -5.56825700 | H | 3.16097500  | 3.58523500  | 0.19573300  |
| N | 2.52093300  | -1.97897300 | -3.53490000 | C | 3.41592500  | 2.45256700  | 2.01930300  |
| C | 2.98752300  | -3.09659000 | -2.73729000 | H | 3.58662000  | 1.60145500  | 3.99103900  |
| C | 1.78840700  | -3.73166900 | -2.02021300 | H | 3.66608100  | 1.52360800  | 1.51571600  |
| O | 1.16713500  | -3.08829600 | -1.15007200 | H | 3.50392100  | 8.03767500  | 4.50219000  |
| C | 4.03343700  | -2.63111900 | -1.70641700 | H | 4.00314600  | 7.30630100  | 2.96607700  |

#### L72F S*k*DHPase.DHU-TS2-II

|   |             |             |             |   |             |            |             |
|---|-------------|-------------|-------------|---|-------------|------------|-------------|
| C | -8.63489000 | 0.26576900  | -1.75350800 | N | -5.39266300 | 0.12964700 | 0.06204800  |
| C | -7.43861400 | 0.08426600  | -0.88595200 | C | -4.03009600 | 6.40709100 | -0.00158500 |
| N | -7.40422000 | -0.73266400 | 0.23484900  | C | -3.85080900 | 5.00655500 | 0.47423400  |
| C | -6.18020000 | 0.61079000  | -0.96747800 | N | -3.58620600 | 4.68705800 | 1.79783700  |
| C | -6.16337300 | -0.67386700 | 0.77733200  | C | -3.86442900 | 3.80148000 | -0.17648500 |

|    |             |             |             |   |             |             |             |
|----|-------------|-------------|-------------|---|-------------|-------------|-------------|
| C  | -3.45046200 | 3.34565400  | 1.90481300  | H | -4.03078100 | -2.13962900 | 5.33339500  |
| N  | -3.61001100 | 2.78007700  | 0.71957200  | H | -8.39966100 | 0.96168600  | -2.56257700 |
| C  | -4.82019800 | -2.04347600 | 4.57571100  | H | -4.79901700 | 1.08675200  | -4.06957400 |
| N  | -4.69560500 | -0.84198100 | 3.78298800  | H | -5.13616300 | -4.66528300 | -2.88424500 |
| C  | -3.58865700 | -0.65174100 | 2.98380500  | H | -5.12866600 | 0.00781000  | 4.11736700  |
| O  | -2.84133000 | -1.67338700 | 2.83965600  | C | -1.80325500 | 6.49505000  | -4.06185700 |
| O  | -3.46235600 | 0.49279600  | 2.45250300  | C | -1.44491600 | 5.53290700  | -2.93144200 |
| C  | -1.91324000 | -4.88647800 | 4.17535600  | S | -0.16668200 | 6.18430400  | -1.76178700 |
| C  | -0.57859200 | -4.56907900 | 3.56423100  | C | 4.49107500  | 2.46211200  | -2.74764200 |
| N  | -0.38788800 | -3.62989600 | 2.55158100  | C | 3.29321000  | 3.26560800  | -3.22494400 |
| C  | 0.63675700  | -5.12267700 | 3.87535500  | O | 2.59398800  | 3.94764200  | -2.45826200 |
| C  | 0.90807800  | -3.63340900 | 2.26611400  | C | 5.29807000  | 3.14677000  | -1.64487400 |
| N  | 1.56038800  | -4.52442300 | 3.04102900  | C | 6.06331600  | 2.13305500  | -0.79777500 |
| C  | -4.08301200 | -4.37560300 | -2.99333100 | O | 5.66906000  | 0.97906300  | -0.62866000 |
| C  | -3.40244700 | -4.22476000 | -1.68007800 | N | 7.19567500  | 2.59447000  | -0.21050100 |
| N  | -3.19159100 | -5.27209900 | -0.79467100 | N | 3.00587000  | 3.15604900  | -4.54137900 |
| C  | -2.87060500 | -3.12710000 | -1.05986200 | C | 1.74676300  | 3.62659300  | -5.09487800 |
| C  | -2.55605200 | -4.78635900 | 0.29926600  | H | -2.32163000 | 5.32272500  | -2.31238200 |
| N  | -2.35474100 | -3.48749900 | 0.16798100  | H | -1.09433000 | 4.57035600  | -3.31442200 |
| C  | -4.29829100 | 0.14784600  | -3.81818700 | H | 0.91399400  | 5.60518500  | -2.33011800 |
| C  | -3.21524400 | 0.38790000  | -2.76473200 | H | -2.15790100 | 7.45256800  | -3.66738300 |
| O  | -3.42923300 | 1.21197100  | -1.84078300 | H | 4.61339000  | 3.67630100  | -0.97150400 |
| O  | -2.16149900 | -0.33023900 | -2.90488200 | H | 5.98047300  | 3.89966000  | -2.05669100 |
| Zn | -3.45909100 | 0.78022800  | 0.36612700  | H | 7.47772100  | 3.56145300  | -0.27047200 |
| Zn | -1.50611300 | -2.16479900 | 1.47526300  | H | 7.68087500  | 1.99081500  | 0.43932200  |
| H  | -8.95978500 | -0.67764400 | -2.20992600 | H | 4.08196800  | 1.52582900  | -2.34931100 |
| H  | -9.48808900 | 0.67707100  | -1.19982700 | H | 1.58453300  | 4.66814200  | -4.80794100 |
| H  | -5.77542900 | 1.29494200  | -1.69353600 | H | 0.90318500  | 3.02364400  | -4.73689800 |
| H  | -8.17628800 | -1.27489300 | 0.59774600  | H | 3.53354100  | 2.48526500  | -5.08206000 |
| H  | -5.87620900 | -1.18086700 | 1.68727300  | H | 5.13856400  | 2.19109900  | -3.58957400 |
| H  | -4.33506200 | 6.40850700  | -1.05108400 | H | 1.79439200  | 3.56453700  | -6.18409800 |
| H  | -3.09997200 | 6.98361900  | 0.07644500  | H | -0.93698200 | 6.70057900  | -4.69914700 |
| H  | -4.01458300 | 3.58979000  | -1.22366200 | H | -2.59520500 | 6.06726400  | -4.69046900 |
| H  | -3.48753900 | 5.34791300  | 2.55641200  | C | 6.01768400  | -2.24619000 | 6.57542900  |
| H  | -3.24814300 | 2.81314300  | 2.82089800  | C | 5.31607500  | -0.89895400 | 6.32490900  |
| H  | -2.40440900 | -3.97470500 | 4.52861400  | C | 4.58178500  | -0.83206900 | 5.00058200  |
| H  | 0.91640100  | -5.86973500 | 4.60214100  | C | 3.18778900  | -0.93117700 | 4.92576500  |
| H  | 2.56214600  | -4.65707700 | 3.05745000  | C | 5.28305300  | -0.67941300 | 3.79264700  |
| H  | 1.38480400  | -3.01209300 | 1.52142200  | C | 2.51010700  | -0.88411200 | 3.70377000  |
| H  | -4.04887400 | -3.42449500 | -3.53062900 | C | 4.63071100  | -0.63401500 | 2.56448100  |
| H  | -3.59718500 | -5.12837300 | -3.62651300 | C | 3.23114000  | -0.73743500 | 2.51022700  |
| H  | -2.78574300 | -2.11509200 | -1.42299200 | O | 2.64445200  | -0.68546900 | 1.28606700  |
| H  | -3.45022500 | -6.23766900 | -0.94465800 | H | 6.06598400  | -0.09751800 | 6.37046400  |
| H  | -2.24900200 | -5.39241800 | 1.13748000  | H | 4.61075900  | -0.70348000 | 7.14258500  |
| H  | -4.77568400 | -2.92324200 | 3.93036700  | H | 2.61104800  | -1.03680200 | 5.84308200  |
| H  | -3.87447800 | -0.30271000 | -4.71769000 | H | 6.36776300  | -0.58926900 | 3.81589300  |
| H  | -5.04999700 | -0.53276900 | -3.40172200 | H | 1.42483000  | -0.93646200 | 3.67190000  |
| H  | -4.80354900 | 6.93683300  | 0.56782700  | H | 5.18095900  | -0.49938500 | 1.63741600  |
| H  | -2.59342700 | -5.36239100 | 3.45736700  | H | 1.65075600  | -0.78504900 | 1.32048600  |
| H  | -1.79016400 | -5.56973100 | 5.02022600  | H | 5.29374800  | -3.06955000 | 6.58508200  |
| H  | -5.78842700 | -2.03372400 | 5.08559300  | H | 6.75287800  | -2.46038200 | 5.79133100  |

|   |             |             |             |   |            |             |             |
|---|-------------|-------------|-------------|---|------------|-------------|-------------|
| H | 6.54202600  | -2.24382000 | 7.53804200  | H | 0.40200400 | -6.88089100 | -3.47947000 |
| N | -0.05233400 | -0.11248600 | -1.18941900 | H | 0.50512900 | -7.60316100 | -1.87103700 |
| C | 0.76878000  | 0.94085200  | -1.71903800 | H | 2.68705900 | -7.77800000 | -3.48192900 |
| O | 1.62753900  | 0.70125700  | -2.57414700 | H | 2.93068100 | -7.28863000 | -1.79813200 |
| N | 0.48420200  | 2.17648400  | -1.28617400 | H | 3.95653500 | -5.44790600 | -2.87558700 |
| C | -0.45489300 | 2.44268600  | -0.20048000 | H | 1.75068200 | -5.50346000 | -5.02041100 |
| C | -0.32564700 | 1.34407100  | 0.84825800  | H | 3.12079800 | -4.36566800 | -4.97167300 |
| C | -0.61077500 | -0.06190300 | 0.29445500  | H | 3.41183300 | -6.08806300 | -5.23341000 |
| O | 0.01834600  | -1.02556500 | 1.02690700  | H | 4.12081200 | -3.33883600 | -3.14173200 |
| H | -1.46870500 | 2.50338200  | -0.60421500 | H | 5.49414800 | -0.77595400 | -1.40104200 |
| H | -0.20159200 | 3.41664700  | 0.22282500  | H | 4.39320300 | -3.16566200 | -0.66111500 |
| H | -1.00787700 | 1.50518300  | 1.68781100  | H | 3.63074000 | -1.57238500 | -0.69324800 |
| H | 0.69518000  | 1.36451800  | 1.24020000  | H | 2.52160000 | -0.85133200 | -3.00473800 |
| H | 0.44927100  | -1.00833700 | -1.31286600 | H | 2.15573200 | -0.69746000 | -6.23468500 |
| H | 1.09935900  | 2.90979800  | -1.63716700 | H | 2.32027000 | 0.36362800  | -4.81106600 |
| O | -1.94866100 | -0.39127200 | 0.18628000  | H | 3.66658900 | 0.16493800  | -5.98790900 |
| H | -1.18076700 | -0.19153400 | -2.02468100 | C | 2.40554000 | 7.60467600  | 3.80527700  |
| C | 2.84456900  | -0.33636500 | -5.46332500 | H | 3.38456500 | 7.38930500  | 4.24731000  |
| C | 3.40987600  | -1.54090900 | -4.72366700 | C | 1.48253500 | 6.37837600  | 3.89675300  |
| O | 4.05483300  | -2.40531100 | -5.31621200 | H | 1.31219100 | 6.12823600  | 4.95133700  |
| N | 3.12399400  | -1.57528600 | -3.39516500 | H | 0.50166900 | 6.64045200  | 3.47552300  |
| C | 3.46970600  | -2.69970800 | -2.54725100 | C | 2.04277300 | 5.17273500  | 3.17167400  |
| C | 2.17770900  | -3.41156000 | -2.12025000 | C | 2.05002600 | 5.13024300  | 1.77048000  |
| O | 1.29905300  | -2.78658300 | -1.49776900 | C | 2.59924500 | 4.09415500  | 3.87103500  |
| C | 4.24202600  | -2.26569400 | -1.27975500 | H | 1.62070900 | 5.95622400  | 1.20615200  |
| O | 5.50047400  | -1.72531000 | -1.61284700 | C | 2.59728200 | 4.04347200  | 1.08759100  |
| N | 2.02395800  | -4.72765000 | -2.38990800 | C | 3.14558700 | 3.00047900  | 3.19496500  |
| C | 2.91932300  | -5.61165800 | -3.18205500 | H | 2.60295200 | 4.11056900  | 4.95932200  |
| C | 2.78762400  | -5.36776200 | -4.69069700 | H | 2.59003000 | 4.03413900  | 0.00111200  |
| C | 2.44456000  | -7.01067400 | -2.74132500 | C | 3.14595800 | 2.97081000  | 1.79866300  |
| C | 0.93279000  | -6.83421300 | -2.52202900 | H | 3.56443600 | 2.16867500  | 3.75403300  |
| C | 0.81857800  | -5.42745600 | -1.91435000 | H | 3.55680400 | 2.11414800  | 1.27109800  |
| H | -0.08164300 | -4.88546800 | -2.21969200 | H | 1.97516800 | 8.46334900  | 4.33380900  |
| H | 0.82215600  | -5.44913000 | -0.81629900 | H | 2.56965500 | 7.89721900  | 2.76236800  |

#### L72F S*k*DHPase.DHU-EP-II

|   |             |             |             |   |             |             |             |
|---|-------------|-------------|-------------|---|-------------|-------------|-------------|
| C | -8.68569000 | 0.29656900  | -1.98766600 | C | -3.77724900 | -0.80803000 | 2.79871100  |
| C | -7.55254300 | 0.08886400  | -1.05223500 | O | -3.10062200 | -1.87869300 | 2.60451000  |
| N | -7.59003500 | -0.70509200 | 0.08451700  | O | -3.58968300 | 0.33422500  | 2.29182800  |
| C | -6.28097000 | 0.57836000  | -1.09326800 | C | -2.13550200 | -5.00119500 | 4.00451700  |
| C | -6.37021800 | -0.66840700 | 0.67632000  | C | -0.75992200 | -4.70273700 | 3.47774000  |
| N | -5.54889000 | 0.09725400  | -0.02427100 | N | -0.49995500 | -3.76182800 | 2.48138900  |
| C | -4.14213300 | 6.39369100  | 0.05448400  | C | 0.43123400  | -5.27143300 | 3.84721700  |
| C | -3.93783100 | 4.98513100  | 0.49645700  | C | 0.81061200  | -3.77775300 | 2.26074300  |
| N | -3.71900100 | 4.63082700  | 1.82008700  | N | 1.40496600  | -4.67983400 | 3.06590500  |
| C | -3.90093400 | 3.80051000  | -0.18982300 | C | -4.09352700 | -4.30966300 | -3.20983700 |
| C | -3.56374700 | 3.28907900  | 1.89366400  | C | -3.37038200 | -4.20607400 | -1.90967900 |
| N | -3.66685000 | 2.75794200  | 0.68663100  | N | -3.15911900 | -5.28435300 | -1.06088300 |
| C | -5.05650000 | -2.17066700 | 4.39082700  | C | -2.80843300 | -3.13489800 | -1.26657700 |
| N | -4.86400400 | -0.95737000 | 3.62880200  | C | -2.50005900 | -4.84836300 | 0.03645000  |

|    |             |             |             |   |             |             |             |
|----|-------------|-------------|-------------|---|-------------|-------------|-------------|
| N  | -2.27904900 | -3.54552900 | -0.05610600 | H | -1.12798300 | 4.60766200  | -3.29482700 |
| C  | -4.28995000 | 0.23314900  | -3.92578700 | H | 0.84597100  | 5.58189800  | -2.16202300 |
| C  | -3.30482100 | 0.31857700  | -2.76016000 | H | -2.16581400 | 7.51507200  | -3.48936000 |
| O  | -3.60171700 | 1.16408200  | -1.82715500 | H | 4.58820300  | 3.91538900  | -0.78774300 |
| O  | -2.32630100 | -0.44685900 | -2.76385900 | H | 6.00157900  | 4.34633600  | -1.74146200 |
| Zn | -3.61532600 | 0.79043400  | 0.18580200  | H | 7.44715900  | 3.98889800  | 0.04429900  |
| Zn | -1.61878700 | -2.36588600 | 1.44139800  | H | 7.72546900  | 2.40197800  | 0.68979600  |
| H  | -9.01961000 | -0.64144900 | -2.44926800 | H | 4.38519100  | 1.84077200  | -2.37006000 |
| H  | -9.55589700 | 0.74886400  | -1.49522900 | H | 1.58755500  | 4.80544500  | -4.75021400 |
| H  | -5.82413500 | 1.23107200  | -1.81661800 | H | 0.98971800  | 3.15213600  | -4.47060200 |
| H  | -8.39020900 | -1.22126700 | 0.42371400  | H | 3.66633300  | 2.75806100  | -4.95332600 |
| H  | -6.13245100 | -1.16963500 | 1.60303600  | H | 5.39420300  | 2.76253000  | -3.49117100 |
| H  | -4.40860600 | 6.41590000  | -1.00510200 | H | 1.78407900  | 3.57071300  | -6.01260100 |
| H  | -3.23351800 | 6.99503100  | 0.18188800  | H | -0.90233100 | 6.83049300  | -4.51717200 |
| H  | -4.01199900 | 3.61233800  | -1.24651700 | H | -2.56076100 | 6.20786400  | -4.62660100 |
| H  | -3.65952500 | 5.27154600  | 2.59980800  | C | 5.71793400  | -2.41882700 | 6.70377100  |
| H  | -3.39432100 | 2.73350400  | 2.80291700  | C | 5.25787500  | -0.98051900 | 6.40963000  |
| H  | -2.64084100 | -4.08166100 | 4.31418900  | C | 4.52851600  | -0.85945400 | 5.08893600  |
| H  | 0.66428900  | -6.02539900 | 4.58304200  | C | 3.13780700  | -0.99530700 | 5.01126000  |
| H  | 2.40189300  | -4.83731300 | 3.12460100  | C | 5.22823200  | -0.65302300 | 3.88939800  |
| H  | 1.34060800  | -3.17241500 | 1.53662300  | C | 2.46358800  | -0.94169100 | 3.78957400  |
| H  | -4.04726500 | -3.34579100 | -3.72269100 | C | 4.57741000  | -0.59480400 | 2.66017000  |
| H  | -3.64505900 | -5.06021100 | -3.87208000 | C | 3.18487300  | -0.74649900 | 2.60393200  |
| H  | -2.70669400 | -2.11635600 | -1.61830300 | O | 2.59501600  | -0.69685400 | 1.37708200  |
| H  | -3.43288800 | -6.24114200 | -1.23862900 | H | 6.13254400  | -0.31745100 | 6.41199300  |
| H  | -2.19534900 | -5.48631900 | 0.85177500  | H | 4.60762300  | -0.63687000 | 7.22434000  |
| H  | -5.07021400 | -3.03397000 | 3.72226500  | H | 2.56363200  | -1.13917300 | 5.92499300  |
| H  | -3.80937000 | -0.21482500 | -4.79810000 | H | 6.30935000  | -0.53102500 | 3.91963300  |
| H  | -5.13761600 | -0.39861200 | -3.63161600 | H | 1.38019500  | -1.02418400 | 3.75385400  |
| H  | -4.95172500 | 6.88243400  | 0.61002800  | H | 5.12440400  | -0.40948300 | 1.73999700  |
| H  | -2.76811000 | -5.48021300 | 3.24640100  | H | 1.61822400  | -0.76468000 | 1.45093300  |
| H  | -2.07414700 | -5.67592700 | 4.86255600  | H | 4.86171300  | -3.10254000 | 6.74588200  |
| H  | -6.01865700 | -2.11496300 | 4.90856700  | H | 6.39471300  | -2.78166200 | 5.92172200  |
| H  | -4.27027000 | -2.33261900 | 5.14060600  | H | 6.24575200  | -2.47785500 | 7.66279600  |
| H  | -8.37514800 | 0.96823000  | -2.79171000 | N | 0.39072400  | -0.26058700 | -1.68968400 |
| H  | -4.68823000 | 1.21898400  | -4.18585600 | C | 1.15859200  | 0.85579400  | -1.83796100 |
| H  | -5.14980200 | -4.57337200 | -3.07237200 | O | 2.35366900  | 0.82557000  | -2.19087900 |
| H  | -5.25609400 | -0.09363600 | 3.97685500  | N | 0.55916100  | 2.05287900  | -1.54010300 |
| C  | -1.79661800 | 6.58569500  | -3.93476000 | C | -0.52587900 | 2.17822700  | -0.57380800 |
| C  | -1.49130000 | 5.54342200  | -2.86108300 | C | -0.30238100 | 1.39979000  | 0.74595800  |
| S  | -0.26541700 | 6.09938500  | -1.59106100 | C | -0.81999300 | -0.01748500 | 0.76382800  |
| C  | 4.69310400  | 2.85344700  | -2.65302600 | O | -0.19267200 | -0.92733900 | 1.40802200  |
| C  | 3.41353100  | 3.54694100  | -3.09837400 | H | -1.47294200 | 1.87653000  | -1.02766200 |
| O  | 2.67926800  | 4.17772800  | -2.32337900 | H | -0.60394100 | 3.24413700  | -0.34798600 |
| C  | 5.36434000  | 3.50482100  | -1.44500900 | H | -0.85324000 | 1.91227100  | 1.54741500  |
| C  | 6.15744000  | 2.49693600  | -0.61568400 | H | 0.75059100  | 1.41476800  | 1.03479800  |
| O  | 5.84143700  | 1.31127600  | -0.51473600 | H | 0.87195700  | -1.15231200 | -1.79253600 |
| N  | 7.22948500  | 3.00377200  | 0.04675200  | H | 1.21065900  | 2.83085000  | -1.60247200 |
| N  | 3.09417600  | 3.38542900  | -4.40567600 | O | -1.94272100 | -0.32060900 | 0.24486600  |
| C  | 1.78584900  | 3.74607700  | -4.93491800 | H | -0.60091500 | -0.24026500 | -1.94467600 |
| H  | -2.39608400 | 5.29713800  | -2.29804500 | C | 2.89891800  | -0.20572800 | -5.37112700 |

C 3.44730900 -1.46773600 -4.71734000  
 O 3.99693600 -2.34523700 -5.38380900  
 N 3.22869300 -1.54095900 -3.37932500  
 C 3.75063400 -2.60647500 -2.54536900  
 C 2.58618100 -3.44754700 -1.99006200  
 O 1.75324700 -2.92464400 -1.22549000  
 C 4.54428900 -2.02128400 -1.35420000  
 O 5.64831100 -1.28412000 -1.83132200  
 N 2.49461100 -4.76161200 -2.29949300  
 C 3.28088100 -5.53898400 -3.29144000  
 C 2.82539700 -5.25513300 -4.72827400  
 C 3.01099300 -6.98480400 -2.83260900  
 C 1.55039500 -6.94838700 -2.35155700  
 C 1.41645500 -5.56339400 -1.69582200  
 H 0.44520600 -5.08824400 -1.86770200  
 H 1.56351800 -5.60342600 -0.60838400  
 H 0.86802700 -7.03481300 -3.20427200  
 H 1.31109700 -7.75959600 -1.65695100  
 H 3.18312200 -7.70922500 -3.63372000  
 H 3.67625800 -7.24077500 -1.99888000  
 H 4.34190500 -5.29591500 -3.18980700  
 H 1.75102400 -5.44132000 -4.84403400  
 H 3.04976800 -4.22707600 -5.02112300  
 H 3.35987700 -5.91779800 -5.42004300  
 H 4.42375600 -3.19604300 -3.16846900  
 H 5.63260500 -0.39925000 -1.42564900  
 H 4.88716300 -2.86308500 -0.72813600  
 H 3.86933100 -1.41330000 -0.74246500  
 H 2.89239300 -0.69756200 -2.90145200  
 H 2.04055700 -0.47681700 -5.99632800  
 H 2.58752000 0.54767700 -4.64489200  
 H 3.66663400 0.19816300 -6.03974300  
 C 2.17695000 7.49740600 4.07876500  
 H 3.14772900 7.27956600 4.53747200  
 C 1.27729900 6.24946000 4.08399600  
 H 1.08300800 5.94647000 5.12065700  
 H 0.30374200 6.51206200 3.64686400  
 C 1.88348700 5.09119500 3.31934800  
 C 1.87495800 5.08431100 1.91771800  
 C 2.50454100 4.02574500 3.98443000  
 H 1.39490200 5.89969000 1.37959500  
 C 2.47360600 4.04788600 1.20031900  
 C 3.10176900 2.98185200 3.27398300  
 H 2.52077900 4.01450100 5.07278000  
 H 2.46329700 4.07007000 0.11411500  
 C 3.08968800 2.98982600 1.87706300  
 H 3.57343700 2.16150800 3.80748900  
 H 3.54774300 2.17684600 1.31963800  
 H 1.71413100 8.32037300 4.63597000  
 H 2.36329700 7.84292000 3.05598700

**Y172F SkDHPase.DHU-ES-II**

C -8.43307500 -1.85652700 -2.09086100  
 C -7.28706300 -1.75554200 -1.14960500  
 N -7.13195200 -2.52057300 -0.00226600  
 C -6.17448200 -0.96679900 -1.19422900  
 C -5.95887300 -2.17701800 0.58827400  
 N -5.34996500 -1.24041900 -0.11943500  
 C -5.43296700 5.17743100 -0.21683500  
 C -4.95523000 3.83444300 0.24004000  
 N -4.80235900 3.51572000 1.58154900  
 C -4.54852800 2.70613900 -0.42758100  
 C -4.31148400 2.25804000 1.68092800  
 N -4.14407500 1.73953400 0.47646400  
 C -4.27255000 -3.27181800 4.28334200  
 N -4.36400700 -2.04255600 3.52303800  
 C -3.32419100 -1.63072400 2.71605700  
 O -2.40223300 -2.49905300 2.53922800  
 O -3.39939600 -0.47443800 2.20779900  
 C -0.75662100 -5.33940100 3.92238200  
 C 0.46600300 -4.73986900 3.29268500  
 N 0.45370400 -3.77560800 2.28130600  
 C 1.76765500 -5.04196000 3.60036600  
 C 1.72435400 -3.52452200 1.99545700  
 N 2.54945700 -4.26857100 2.76641500  
 C -2.89728300 -5.27952600 -3.28966600  
 C -2.19546500 -4.99427700 -2.00875400  
 N -1.65686800 -5.94314000 -1.14954900  
 C -1.94643100 -3.79546500 -1.40647900  
 C -1.11562400 -5.29739600 -0.08570000  
 N -1.27912900 -3.99019600 -0.21354700  
 C -4.14709300 -0.92032000 -4.07174900  
 C -3.23554600 -0.55196600 -2.89411300  
 O -3.72825500 0.24379500 -2.01239200  
 O -2.10807400 -1.08686900 -2.82856400  
 Zn -3.55336200 -0.19455300 0.04958800  
 Zn -1.03354500 -2.45124300 1.14121300  
 N 1.19214200 0.22977900 -0.26605400  
 C 1.32987300 1.44167700 -0.97400100  
 O 2.12778800 1.51194600 -1.91310800  
 N 0.58513200 2.47256800 -0.53607800  
 C -0.55949700 2.28764100 0.35246600  
 C -0.21198400 1.27211900 1.43947500  
 C 0.47726700 0.05680100 0.87592600  
 O 0.49513700 -1.03954000 1.46265900  
 H -8.51389800 -2.85519900 -2.53889300  
 H -9.39249900 -1.63443400 -1.60637300  
 H -5.88483200 -0.23170200 -1.92573200  
 H -7.78067900 -3.21456700 0.34254000  
 H -5.60350000 -2.59356100 1.51988400  
 H -5.60234700 5.16659000 -1.29647300

|   |             |             |             |   |             |             |             |
|---|-------------|-------------|-------------|---|-------------|-------------|-------------|
| H | -4.69756400 | 5.96215100  | -0.00085500 | H | 0.05134800  | 7.02357900  | 2.36357400  |
| H | -4.51421200 | 2.50201900  | -1.48653500 | H | -1.33477200 | 5.67539700  | 4.72131500  |
| H | -4.96460700 | 4.14242400  | 2.35745000  | H | -2.99196700 | 5.71925600  | 2.91486400  |
| H | -4.09829100 | 1.74558500  | 2.60591600  | H | -2.35715800 | 4.06602400  | 3.08460300  |
| H | -1.41864700 | -4.55905400 | 4.31025800  | H | -1.81831300 | 5.10085200  | 1.74736500  |
| H | 2.19099000  | -5.71829500 | 4.32703700  | H | -0.03671700 | 3.67392100  | 4.02604400  |
| H | 3.55763800  | -4.20537800 | 2.77253600  | H | 0.64917500  | 4.57189500  | 2.65618700  |
| H | 2.07901900  | -2.83383600 | 1.24454700  | H | 1.05720500  | 5.02926100  | 4.31548300  |
| H | -3.13905600 | -4.33187500 | -3.77689600 | H | 1.09865100  | 7.30988400  | 4.68359300  |
| H | -2.27863200 | -5.86195000 | -3.98412900 | H | -3.30887200 | 4.35691700  | -2.32456800 |
| H | -2.17555900 | -2.81395000 | -1.78853500 | H | -1.89322500 | 4.40788100  | -3.35499700 |
| H | -1.65811900 | -6.94434900 | -1.28834400 | H | -0.43767700 | 5.79156400  | -1.94990100 |
| H | -0.62037600 | -5.79332900 | 0.73471900  | H | -4.01243000 | 6.64844500  | -3.14803600 |
| H | -4.03783000 | -4.10288100 | 3.61569000  | H | 4.18821600  | 2.65026400  | -1.65714900 |
| H | -3.55736300 | -1.29017700 | -4.91362300 | H | 3.57599900  | 3.84624400  | -0.52460300 |
| H | -4.83129000 | -1.71496600 | -3.74847200 | H | 5.70797300  | 5.84853900  | -0.67216600 |
| H | -1.42884000 | 1.94419600  | -0.21882600 | H | 7.10956000  | 5.06783800  | -0.01464900 |
| H | -0.80875700 | 3.25537900  | 0.78884000  | H | 4.65376100  | 4.44095700  | -3.33589100 |
| H | -1.10445300 | 0.93463800  | 1.97013200  | H | 0.32435400  | 5.09571300  | -4.47603700 |
| H | 0.48036000  | 1.71104200  | 2.17207600  | H | 0.36821500  | 3.34309200  | -4.15472100 |
| H | -6.37821000 | 5.45746000  | 0.26365600  | H | 3.00848300  | 4.05161900  | -4.77939000 |
| H | -1.34205200 | -5.92611100 | 3.20269800  | H | 4.17974000  | 5.69008800  | -2.18474200 |
| H | -0.47186200 | -6.00219500 | 4.74424700  | H | 0.91323900  | 3.97787800  | -5.72754600 |
| H | -5.23767700 | -3.46570700 | 4.76129100  | H | -2.60034100 | 6.69671700  | -4.20739300 |
| H | -3.50009700 | -3.23552000 | 5.06369100  | H | -3.87246900 | 5.49009600  | -4.48734900 |
| H | -8.29989100 | -1.13897100 | -2.90426900 | H | -0.45665100 | 7.90481400  | 5.28146300  |
| H | -4.75583300 | -0.06757000 | -4.38780100 | H | 0.44231900  | 8.83050400  | 4.07128400  |
| H | -3.83308900 | -5.83307700 | -3.13813400 | C | 6.02627400  | -0.89923000 | 7.03991500  |
| H | -4.94989500 | -1.29777900 | 3.87377500  | C | 5.42639900  | 0.45425000  | 6.61930000  |
| H | 1.76033100  | -0.56648700 | -0.59454100 | C | 4.85786700  | 0.43016900  | 5.21567900  |
| H | 0.70058900  | 3.33903600  | -1.06198000 | C | 3.62604900  | -0.18903900 | 4.95904400  |
| O | -1.80099600 | -1.01971800 | -0.06421900 | C | 5.55766600  | 0.98786800  | 4.13738100  |
| H | -1.62492300 | -1.04105900 | -1.03148000 | C | 3.11387000  | -0.26298700 | 3.66370400  |
| C | 0.17285700  | 7.81653800  | 4.38786300  | C | 5.05087600  | 0.92518700  | 2.83715200  |
| C | -0.56330800 | 7.06113000  | 3.27398600  | C | 3.82934900  | 0.29255000  | 2.59892600  |
| C | -0.95814600 | 5.62858300  | 3.68771900  | H | 6.19799700  | 1.23032900  | 6.69054400  |
| C | -2.09446300 | 5.09487600  | 2.80921300  | H | 4.63863400  | 0.73266400  | 7.33185600  |
| C | 0.24510600  | 4.67351600  | 3.67257800  | H | 3.06190700  | -0.61637800 | 5.78626200  |
| C | -3.31001500 | 6.02605500  | -3.71193400 | H | 6.51141200  | 1.47895400  | 4.31932100  |
| C | -2.59438200 | 5.03414900  | -2.79757400 | H | 2.15657200  | -0.74393600 | 3.48131000  |
| S | -1.67131800 | 5.82672500  | -1.40167700 | H | 5.60357100  | 1.37291600  | 2.01441400  |
| C | 4.00178300  | 4.64804900  | -2.48001100 | H | 5.26980000  | -1.69171300 | 7.00796300  |
| C | 2.52438100  | 4.58208000  | -2.87071600 | H | 6.84290600  | -1.19103700 | 6.37002100  |
| O | 1.63279100  | 4.81118800  | -2.04249400 | H | 6.42355800  | -0.85220800 | 8.06020500  |
| C | 4.31187400  | 3.68037500  | -1.32205900 | C | 2.97537100  | 0.65502300  | -5.10313100 |
| C | 5.69820400  | 3.76470200  | -0.69601200 | C | 3.86711700  | -0.40704800 | -4.48622600 |
| O | 6.31025200  | 2.75318800  | -0.34264200 | O | 4.63218200  | -1.08818600 | -5.16619600 |
| N | 6.22504600  | 5.00027400  | -0.49984800 | N | 3.70100400  | -0.55668800 | -3.14491700 |
| N | 2.24920200  | 4.30427400  | -4.16363900 | C | 4.55017000  | -1.41387500 | -2.34373500 |
| C | 0.88178700  | 4.17157400  | -4.65400000 | C | 3.66385500  | -2.47619000 | -1.67881200 |
| H | -1.46938400 | 7.62274400  | 3.00804700  | O | 2.83149600  | -2.12277000 | -0.81344600 |

|   |            |             |             |   |            |             |             |
|---|------------|-------------|-------------|---|------------|-------------|-------------|
| C | 5.29301100 | -0.59762500 | -1.26712800 | H | 5.66917600 | -3.92727400 | -2.97285300 |
| O | 6.02986100 | 0.41093200  | -1.91282100 | H | 3.13532200 | -4.66946900 | -4.55696300 |
| N | 3.77589500 | -3.77104900 | -2.03116000 | H | 4.14150700 | -3.21614700 | -4.80045500 |
| C | 4.68193100 | -4.39201200 | -3.03925500 | H | 4.79993300 | -4.81671600 | -5.15433800 |
| C | 4.14768000 | -4.25853600 | -4.47243200 | H | 5.27930600 | -1.84864800 | -3.02760900 |
| C | 4.73398900 | -5.85102200 | -2.54541100 | H | 6.18427800 | 1.14509900  | -1.28348300 |
| C | 3.31056200 | -6.10785400 | -2.02440000 | H | 5.93951600 | -1.28399600 | -0.69136000 |
| C | 2.92424200 | -4.77574300 | -1.36386400 | H | 4.55461500 | -0.18562600 | -0.56512300 |
| H | 1.86739000 | -4.51549200 | -1.47692700 | H | 3.12153400 | 0.12025000  | -2.65198000 |
| H | 3.14289000 | -4.77419800 | -0.28951900 | H | 2.20164500 | 0.16356300  | -5.70402900 |
| H | 2.63490100 | -6.33399100 | -2.85635200 | H | 2.49367000 | 1.29646200  | -4.36210800 |
| H | 3.25851500 | -6.94470000 | -1.32154300 | H | 3.58076100 | 1.25571600  | -5.78965200 |
| H | 5.03549400 | -6.54072600 | -3.33855100 | H | 3.43594900 | 0.22923400  | 1.58821400  |
| H | 5.45750300 | -5.94249100 | -1.72610900 |   |            |             |             |

### Y172F S*k*DHPase.DHU-TS1-II

|    |             |             |             |    |             |             |             |
|----|-------------|-------------|-------------|----|-------------|-------------|-------------|
| C  | -8.13717600 | -2.94574000 | -1.59292000 | Zn | -0.47229800 | -2.63611300 | 1.30651400  |
| C  | -6.86202600 | -2.77167000 | -0.84130100 | N  | 0.80932700  | 0.21529800  | -0.52343000 |
| N  | -6.32047800 | -3.70737700 | 0.03129700  | C  | 0.86470500  | 1.42100400  | -1.20781200 |
| C  | -5.96086600 | -1.74532100 | -0.84762100 | O  | 1.69635900  | 1.59664400  | -2.11380800 |
| C  | -5.14312200 | -3.22452700 | 0.50492100  | N  | 0.01049600  | 2.39045700  | -0.81665800 |
| N  | -4.89499900 | -2.03609400 | -0.01630000 | C  | -1.07066700 | 2.17767700  | 0.13331700  |
| C  | -5.96837400 | 4.46890700  | -0.07354200 | C  | -0.62323300 | 1.18489100  | 1.20054200  |
| C  | -5.34923500 | 3.19048900  | 0.38736800  | C  | 0.01754100  | -0.05304100 | 0.60136000  |
| N  | -5.14062500 | 2.89804200  | 1.72718000  | O  | 0.48215300  | -0.95295800 | 1.40549800  |
| C  | -4.84206700 | 2.10808700  | -0.28443000 | H  | -8.10691500 | -3.81621600 | -2.26025300 |
| C  | -4.52301700 | 1.69754900  | 1.82213100  | H  | -8.99975400 | -3.06924000 | -0.92606800 |
| N  | -4.32583100 | 1.19258200  | 0.61609600  | H  | -5.97667500 | -0.83250500 | -1.41907400 |
| C  | -3.49870700 | -3.61352700 | 4.57004500  | H  | -6.73038700 | -4.59812300 | 0.27632000  |
| N  | -3.77557200 | -2.42738400 | 3.78855100  | H  | -4.50984500 | -3.75131400 | 1.20284200  |
| C  | -2.96501100 | -2.02784400 | 2.76257300  | H  | -6.14613600 | 4.42927900  | -1.15112000 |
| O  | -2.08803200 | -2.88482200 | 2.38718900  | H  | -5.31442300 | 5.32675000  | 0.12550100  |
| O  | -3.18272700 | -0.88953200 | 2.24808100  | H  | -4.79733700 | 1.91228100  | -1.34460500 |
| C  | 0.22916200  | -5.23031900 | 4.06415800  | H  | -5.35477500 | 3.50925000  | 2.50312500  |
| C  | 1.33494900  | -4.42961400 | 3.45033600  | H  | -4.23196600 | 1.22082500  | 2.74472900  |
| N  | 1.14719200  | -3.54268900 | 2.39269000  | H  | -0.59818500 | -4.58393500 | 4.37320200  |
| C  | 2.66050800  | -4.42339000 | 3.79752400  | H  | 3.20187700  | -4.95607400 | 4.56401200  |
| C  | 2.33860900  | -3.02530100 | 2.11420200  | H  | 4.24583900  | -3.24732400 | 2.96251100  |
| N  | 3.27797900  | -3.53661700 | 2.93667100  | H  | 2.54233800  | -2.30188200 | 1.33841700  |
| C  | -2.27951300 | -5.67820000 | -3.01437000 | H  | -2.66198700 | -4.79146900 | -3.52564100 |
| C  | -1.53753100 | -5.25312200 | -1.79667600 | H  | -1.64116900 | -6.22048700 | -3.72310600 |
| N  | -0.86247900 | -6.11059800 | -0.93855300 | H  | -1.71116700 | -3.06610500 | -1.65709600 |
| C  | -1.37551300 | -4.00998200 | -1.25278800 | H  | -0.76431700 | -7.11039700 | -1.05057400 |
| C  | -0.33331100 | -5.37706500 | 0.07065800  | H  | 0.25082500  | -5.79018800 | 0.87866700  |
| N  | -0.63368900 | -4.09816800 | -0.09143200 | H  | -3.31629900 | -4.46208600 | 3.90784500  |
| C  | -4.11717300 | -1.54016500 | -3.83657700 | H  | -3.52876200 | -1.91648300 | -4.67625200 |
| C  | -3.20454100 | -0.99574200 | -2.73546800 | H  | -4.71213200 | -2.36302600 | -3.42135800 |
| O  | -3.74869100 | -0.22336700 | -1.86415400 | H  | -1.96414900 | 1.81251300  | -0.38534900 |
| O  | -2.01165600 | -1.37381700 | -2.70552900 | H  | -1.32304700 | 3.13956600  | 0.58559600  |
| Zn | -3.39520000 | -0.59036600 | 0.16700300  | H  | -1.44758800 | 0.87541400  | 1.84391300  |



|   |             |             |             |   |             |             |             |
|---|-------------|-------------|-------------|---|-------------|-------------|-------------|
| H | 0.14828900  | 1.64141600  | 1.83436500  | H | -0.32404400 | 3.24359700  | -4.41956300 |
| H | -6.93203900 | 4.65530800  | 0.41577700  | H | 2.29112000  | 3.87182000  | -4.86673600 |
| H | -0.18379200 | -5.96572500 | 3.36148700  | H | 3.90874000  | 4.67552300  | -3.35900100 |
| H | 0.59228200  | -5.77483300 | 4.94029900  | H | 0.22703400  | 4.03252500  | -5.92039100 |
| H | -4.36739400 | -3.83675900 | 5.19612900  | H | -3.67508600 | 6.19348300  | -4.36066200 |
| H | -2.62339800 | -3.49578600 | 5.22360300  | H | -4.63616600 | 4.69774300  | -4.32792200 |
| H | -8.31854000 | -2.06168900 | -2.20903900 | H | -1.09895600 | 7.98467600  | 5.06249400  |
| H | -4.81678500 | -0.77370700 | -4.18347800 | H | -0.39163500 | 8.97360900  | 3.77703700  |
| H | -3.13190000 | -6.32687100 | -2.77450200 | C | 6.54230300  | 0.13219500  | 6.67748100  |
| H | -4.38558900 | -1.71771200 | 4.16638500  | C | 5.53546700  | 1.26305400  | 6.39844200  |
| H | 1.52383500  | -0.48007700 | -0.76362300 | C | 4.81575400  | 1.11144200  | 5.07324800  |
| H | 0.11179500  | 3.27734600  | -1.30607400 | C | 3.62870500  | 0.37108000  | 4.97901000  |
| O | -1.43517200 | -0.94324600 | -0.07431400 | C | 5.32919700  | 1.69024600  | 3.90364300  |
| H | -1.36474400 | -0.98645400 | -1.06542900 | C | 2.97502800  | 0.21107200  | 3.75518800  |
| C | -0.51159100 | 7.94563000  | 4.13709700  | C | 4.68224700  | 1.53770800  | 2.67552300  |
| C | -1.20266800 | 7.06700800  | 3.08644700  | C | 3.50210300  | 0.79373700  | 2.59979600  |
| C | -1.40047900 | 5.60569400  | 3.53805200  | H | 6.06400500  | 2.22442300  | 6.41928200  |
| C | -2.50583100 | 4.92924700  | 2.71708100  | H | 4.80034300  | 1.29616100  | 7.21275300  |
| C | -0.09389900 | 4.80086400  | 3.47046800  | H | 3.20658100  | -0.07362100 | 5.87871600  |
| C | -4.15929600 | 5.46432400  | -3.70386100 | H | 6.24502100  | 2.27589200  | 3.96027700  |
| C | -3.15039900 | 4.82258800  | -2.75437300 | H | 2.04605300  | -0.34984100 | 3.69463200  |
| S | -2.35859600 | 6.06421400  | -1.62583800 | H | 5.08513000  | 2.00994600  | 1.78277900  |
| C | 3.22505100  | 4.36277100  | -2.56061900 | H | 6.04144500  | -0.84274100 | 6.70079900  |
| C | 1.77699700  | 4.51329100  | -3.01011100 | H | 7.31371600  | 0.09183500  | 5.90008000  |
| O | 0.86716600  | 4.82981100  | -2.22844600 | H | 7.03993700  | 0.28036500  | 7.64251600  |
| C | 3.51231900  | 5.11623000  | -1.26188300 | C | 2.68018300  | 0.88908500  | -5.30951600 |
| C | 4.73489900  | 4.57459200  | -0.53042000 | C | 3.69251000  | -0.04276200 | -4.66212800 |
| O | 5.01674800  | 3.37533300  | -0.49420600 | O | 4.56138000  | -0.61005100 | -5.32313800 |
| N | 5.47919400  | 5.49653600  | 0.12976900  | N | 3.52544100  | -0.20219500 | -3.32318700 |
| N | 1.53546300  | 4.25404300  | -4.31472800 | C | 4.47663300  | -0.91755200 | -2.49684000 |
| C | 0.17991000  | 4.12528100  | -4.83346300 | C | 3.75895300  | -2.09973200 | -1.83029800 |
| H | -2.18308200 | 7.50658900  | 2.85623000  | O | 2.89094800  | -1.87902600 | -0.95873600 |
| H | -0.63648200 | 7.08173800  | 2.14441700  | C | 5.06211300  | 0.00805200  | -1.41038200 |
| H | -1.73086000 | 5.62337900  | 4.58841400  | O | 5.73561800  | 1.07691400  | -2.03166800 |
| H | -3.46883200 | 5.43469100  | 2.87111100  | N | 4.06681600  | -3.36558500 | -2.18143400 |
| H | -2.62207400 | 3.87512900  | 2.99909700  | C | 5.05560900  | -3.84469600 | -3.18713300 |
| H | -2.28685300 | 4.97214900  | 1.64238200  | C | 4.50413400  | -3.81331100 | -4.61973200 |
| H | -0.23195500 | 3.78197800  | 3.85239400  | C | 5.34445600  | -5.27013200 | -2.67687300 |
| H | 0.26355800  | 4.72526800  | 2.43469700  | C | 3.98555600  | -5.74591700 | -2.13757300 |
| H | 0.70223500  | 5.26603900  | 4.06180500  | C | 3.39056000  | -4.48287600 | -1.49503300 |
| H | 0.48574000  | 7.57004700  | 4.39413400  | H | 2.30541500  | -4.39895300 | -1.60904800 |
| H | -3.63089000 | 4.06328100  | -2.13120800 | H | 3.60553000  | -4.42638500 | -0.42070300 |
| H | -2.35340800 | 4.32471800  | -3.31051100 | H | 3.35056300  | -6.09366900 | -2.95977800 |
| H | -1.07501300 | 5.75395600  | -1.91268200 | H | 4.07604900  | -6.56844500 | -1.42158000 |
| H | -4.94801100 | 5.98983600  | -3.15367800 | H | 5.74621300  | -5.91385600 | -3.46437100 |
| H | 2.65060400  | 4.98703500  | -0.59525100 | H | 6.08024000  | -5.23342200 | -1.86419500 |
| H | 3.60861700  | 6.19339300  | -1.44034100 | H | 5.95565900  | -3.22688200 | -3.13205900 |
| H | 5.25470300  | 6.47986000  | 0.12486600  | H | 3.56994000  | -4.38133400 | -4.69687500 |
| H | 6.27143100  | 5.18267200  | 0.67358400  | H | 4.33290100  | -2.78810600 | -4.95685100 |
| H | 3.38860900  | 3.29223400  | -2.39124900 | H | 5.23567600  | -4.26697600 | -5.29885100 |
| H | -0.39669100 | 5.01770100  | -4.58001100 | H | 5.28028400  | -1.23976000 | -3.15926700 |

|   |            |             |             |   |            |            |             |
|---|------------|-------------|-------------|---|------------|------------|-------------|
| H | 5.53815000 | 1.88911200  | -1.53093100 | H | 2.11471200 | 0.33009800 | -6.06257000 |
| H | 5.74564600 | -0.58570100 | -0.77784600 | H | 1.98764500 | 1.33433000 | -4.59204500 |
| H | 4.24488700 | 0.35703900  | -0.76714100 | H | 3.22992300 | 1.67270100 | -5.84387700 |
| H | 2.83033000 | 0.37308500  | -2.84374300 | H | 2.98636500 | 0.67321700 | 1.65118000  |

### Y172F S&kDHPase.DHU-INT-II

|    |             |             |             |   |             |             |             |
|----|-------------|-------------|-------------|---|-------------|-------------|-------------|
| C  | -7.83712400 | -3.66646500 | -1.60200400 | H | -8.66618300 | -3.91176300 | -0.92643100 |
| C  | -6.57155900 | -3.39084000 | -0.86658600 | H | -5.91594800 | -1.34719800 | -1.37810800 |
| N  | -5.91259100 | -4.29785300 | -0.04615400 | H | -6.21905100 | -5.23707100 | 0.16732000  |
| C  | -5.78610400 | -2.27434200 | -0.84567100 | H | -4.07799300 | -4.19487800 | 1.08577700  |
| C  | -4.78272800 | -3.71133500 | 0.42585800  | H | -6.54967300 | 3.84949300  | -1.11306600 |
| N  | -4.67613800 | -2.48258300 | -0.04835200 | H | -5.78847900 | 4.82029500  | 0.15333300  |
| C  | -6.36789200 | 3.90859700  | -0.03708600 | H | -5.00278200 | 1.46520900  | -1.31755800 |
| C  | -5.63783300 | 2.69190400  | 0.42164700  | H | -5.63351300 | 3.01971400  | 2.53566900  |
| N  | -5.38591600 | 2.42252500  | 1.75861400  | H | -4.31889100 | 0.83558000  | 2.76582400  |
| C  | -5.05146100 | 1.65574300  | -0.25664000 | H | -0.21656700 | -4.65382500 | 4.21447600  |
| C  | -4.66740800 | 1.27965000  | 1.84670400  | H | 3.63263400  | -4.55637600 | 4.68988700  |
| N  | -4.44811300 | 0.79043700  | 0.63812700  | H | 4.52103900  | -2.73309000 | 3.12181400  |
| C  | -3.14544700 | -3.93704200 | 4.55091500  | H | 2.78405800  | -2.01888000 | 1.40638600  |
| N  | -3.49153300 | -2.77361600 | 3.76149800  | H | -2.21233500 | -4.96555500 | -3.53228900 |
| C  | -2.74079000 | -2.34702000 | 2.70306800  | H | -1.06743700 | -6.28968100 | -3.77182600 |
| O  | -1.82847000 | -3.15268300 | 2.30038400  | H | -1.41875800 | -3.22457300 | -1.58634000 |
| O  | -3.04684000 | -1.22901800 | 2.18342100  | H | -0.10332400 | -7.18780600 | -1.15338000 |
| C  | 0.71626600  | -5.19514500 | 4.03005300  | H | 0.80423000  | -5.86233000 | 0.82379000  |
| C  | 1.76509600  | -4.27579600 | 3.49007900  | H | -2.90810400 | -4.77491200 | 3.89253100  |
| N  | 1.52170000  | -3.42547200 | 2.41886700  | H | -3.34615700 | -2.20715500 | -4.67460800 |
| C  | 3.06169500  | -4.10028100 | 3.89608200  | H | -4.50882500 | -2.74140900 | -3.43369100 |
| C  | 2.64632300  | -2.75786900 | 2.18362700  | H | -2.13617800 | 1.77860200  | -0.35925900 |
| N  | 3.60079300  | -3.14548900 | 3.05295400  | H | -1.49457400 | 3.04944700  | 0.68304900  |
| C  | -1.75234700 | -5.83048700 | -3.04821900 | H | -1.54020200 | 0.74510900  | 1.82036900  |
| C  | -1.05030100 | -5.38147000 | -1.81603400 | H | 0.06778600  | 1.48236700  | 1.75966600  |
| N  | -0.29316400 | -6.20728200 | -0.99721500 | H | -7.34011100 | 4.01362900  | 0.45949700  |
| C  | -0.99752900 | -4.15074900 | -1.22269000 | H | 0.48553800  | -6.00837800 | 3.32944500  |
| C  | 0.17704400  | -5.47020600 | 0.03760200  | H | 1.04590700  | -5.65161400 | 4.96769500  |
| N  | -0.24031400 | -4.21908100 | -0.06994500 | H | -4.00157700 | -4.21094500 | 5.17388200  |
| C  | -3.97010300 | -1.87714500 | -3.84131800 | H | -2.28286800 | -3.76135300 | 5.20835000  |
| C  | -3.11739300 | -1.26896800 | -2.73155200 | H | -8.12570500 | -2.78016200 | -2.17225600 |
| O  | -3.72982500 | -0.55261700 | -1.85916000 | H | -4.71972200 | -1.16295300 | -4.19495500 |
| O  | -1.89486800 | -1.54419600 | -2.69438600 | H | -2.54283000 | -6.56058600 | -2.83169600 |
| Zn | -3.36616500 | -0.87335500 | 0.16425100  | H | -4.14536900 | -2.10113100 | 4.13388400  |
| Zn | -0.13137500 | -2.79281200 | 1.36110900  | H | 1.50568400  | -0.34216200 | -0.81544000 |
| N  | 0.68847000  | 0.25235900  | -0.65982800 | H | -0.12009500 | 3.32980800  | -1.23516600 |
| C  | 0.75073700  | 1.51548500  | -1.19765200 | O | -1.35470000 | -0.88548400 | -0.20007800 |
| O  | 1.63414800  | 1.83016100  | -2.02212100 | H | -1.28173200 | -0.95870800 | -1.19893400 |
| N  | -0.17505000 | 2.41820100  | -0.78788400 | C | -1.25224900 | 7.85318200  | 4.18948100  |
| C  | -1.23415400 | 2.12424000  | 0.16205500  | C | -1.86012800 | 6.92055500  | 3.13401500  |
| C  | -0.74369600 | 1.07209000  | 1.14909500  | C | -1.93044800 | 5.44714100  | 3.58441900  |
| C  | -0.17841700 | -0.15790400 | 0.43154100  | C | -2.97071400 | 4.67647600  | 2.76151400  |
| O  | 0.45149800  | -1.00670100 | 1.24812100  | C | -0.55820700 | 4.75990800  | 3.51989900  |
| H  | -7.73007200 | -4.49772100 | -2.31017100 | C | -4.66629300 | 5.09177200  | -3.66302900 |

|   |             |            |             |   |            |             |             |
|---|-------------|------------|-------------|---|------------|-------------|-------------|
| C | -3.59055400 | 4.56805300 | -2.71448800 | C | 4.51987000 | 1.79450300  | 2.61574500  |
| S | -2.94670600 | 5.89443500 | -1.58940700 | C | 3.38412800 | 0.98062100  | 2.59446500  |
| C | 2.77067500  | 4.69864100 | -2.48983500 | H | 5.90104100 | 2.75854900  | 6.29717400  |
| C | 1.31651700  | 4.67265800 | -2.96022700 | H | 4.70080500 | 1.80464100  | 7.15561800  |
| O | 0.37345100  | 4.96370700 | -2.20954500 | H | 3.17896600 | 0.27156800  | 5.91961600  |
| C | 2.85455600  | 4.89140100 | -0.96925000 | H | 6.05118200 | 2.68946800  | 3.83535800  |
| C | 4.29119200  | 4.92350900 | -0.47013400 | H | 2.00983700 | -0.18281300 | 3.77103000  |
| O | 5.04367700  | 3.94789500 | -0.51885800 | H | 4.88553900 | 2.24714900  | 1.69713200  |
| N | 4.71355500  | 6.10485400 | 0.04883700  | H | 6.06468100 | -0.28324600 | 6.75487600  |
| N | 1.11635400  | 4.35504300 | -4.25957500 | H | 7.27375300 | 0.67832700  | 5.89004500  |
| C | -0.22299300 | 4.17129000 | -4.80652000 | H | 6.99833700 | 0.95085500  | 7.62091000  |
| H | -2.87426200 | 7.27331400 | 2.90054200  | C | 2.56786200 | 1.18599500  | -5.30659700 |
| H | -1.29364800 | 6.98596100 | 2.19440200  | C | 3.64865400 | 0.32655800  | -4.67326800 |
| H | -2.26350700 | 5.43556500 | 4.63406000  | O | 4.56313800 | -0.15210200 | -5.34284100 |
| H | -3.97493800 | 5.09423500 | 2.91641000  | N | 3.48925000 | 0.12648100  | -3.33870900 |
| H | -2.99109600 | 3.61571500 | 3.04198300  | C | 4.53831900 | -0.45151300 | -2.52039400 |
| H | -2.75624400 | 4.73959000 | 1.68708500  | C | 3.99060700 | -1.70194200 | -1.81884900 |
| H | -0.60770900 | 3.73151700 | 3.89780700  | O | 3.14595500 | -1.58065800 | -0.90819500 |
| H | -0.19097900 | 4.71903600 | 2.48578600  | C | 5.02264300 | 0.57106300  | -1.47496100 |
| H | 0.19135200  | 5.29146200 | 4.11618000  | O | 5.51452100 | 1.69987500  | -2.15663000 |
| H | -0.22744800 | 7.56439800 | 4.45048900  | N | 4.42164000 | -2.92719700 | -2.19372800 |
| H | -3.98047600 | 3.75716300 | -2.09244800 | C | 5.42212900 | -3.29336100 | -3.23508400 |
| H | -2.74124600 | 4.16732700 | -3.27131500 | C | 4.82446400 | -3.32967000 | -4.64958300 |
| H | -1.63366300 | 5.69364000 | -1.83753900 | C | 5.89130100 | -4.67429500 | -2.73595600 |
| H | -5.50928300 | 5.52478800 | -3.11253900 | C | 4.61710600 | -5.30028800 | -2.14603500 |
| H | 2.36172500  | 4.04364600 | -0.48494000 | C | 3.90821000 | -4.11057900 | -1.47966900 |
| H | 2.31002800  | 5.79503200 | -0.67991100 | H | 2.81650800 | -4.15372400 | -1.54795700 |
| H | 4.11330400  | 6.91155300 | 0.12397900  | H | 4.15922400 | -4.02494700 | -0.41482600 |
| H | 5.66211500  | 6.17078000 | 0.39265500  | H | 3.99489800 | -5.71947400 | -2.94446900 |
| H | 3.26502000  | 3.76225800 | -2.76785200 | H | 4.82726500 | -6.10556300 | -1.43547000 |
| H | -0.83749300 | 5.04279400 | -4.57069700 | H | 6.33518600 | -5.27143800 | -3.53747800 |
| H | -0.70312800 | 3.27407400 | -4.39718600 | H | 6.64710900 | -4.54968900 | -1.95087200 |
| H | 1.89520000  | 3.97204300 | -4.77747700 | H | 6.24700800 | -2.57653900 | -3.21132700 |
| H | 3.29115300  | 5.51363300 | -3.01183600 | H | 3.95594200 | -3.99684000 | -4.69553100 |
| H | -0.14860400 | 4.07278200 | -5.89154700 | H | 4.53234400 | -2.33058700 | -4.98110200 |
| H | -4.26765200 | 5.87111600 | -4.31961500 | H | 5.57928900 | -3.70343500 | -5.35153800 |
| H | -5.05408100 | 4.27668700 | -4.28739300 | H | 5.36240900 | -0.68494700 | -3.19500300 |
| H | -1.84500900 | 7.83920200 | 5.11215000  | H | 5.36325000 | 2.48301900  | -1.59241400 |
| H | -1.21975100 | 8.88861300 | 3.83222400  | H | 5.80110400 | 0.09506800  | -0.85143700 |
| C | 6.50542300  | 0.71713500 | 6.67057800  | H | 4.18281000 | 0.82324000  | -0.81448400 |
| C | 5.43044400  | 1.76817900 | 6.33650500  | H | 2.77414800 | 0.67029000  | -2.84731000 |
| C | 4.70857400  | 1.50168800 | 5.03021000  | H | 2.07855100 | 0.61652300  | -6.10357400 |
| C | 3.56494100  | 0.69085400 | 4.99185500  | H | 1.81869100 | 1.52668500  | -4.58827200 |
| C | 5.17216300  | 2.04786300 | 3.82452200  | H | 3.05369100 | 2.04522500  | -5.78452500 |
| C | 2.90674200  | 0.43125200 | 3.78756800  | H | 2.86352800 | 0.77719600  | 1.66253100  |

**Y172F *SkDHPase*.DHU-TS2-II**

|   |            |            |             |   |            |            |             |
|---|------------|------------|-------------|---|------------|------------|-------------|
| C | 4.68981000 | 6.91514600 | -1.95354900 | C | 3.68234300 | 4.69062300 | -1.05090100 |
| C | 3.78289000 | 6.05103300 | -1.14475100 | C | 2.15148300 | 5.47809200 | 0.26423400  |
| N | 2.79432100 | 6.53296300 | -0.29622000 | N | 2.66653400 | 4.34543300 | -0.18007500 |

|    |             |             |             |   |             |             |             |
|----|-------------|-------------|-------------|---|-------------|-------------|-------------|
| C  | 7.39615500  | -0.15514100 | 0.20883500  | H | 8.28010300  | 0.28634000  | 0.68497900  |
| C  | 6.14323300  | 0.54457900  | 0.60534200  | H | -4.01485800 | 4.77494800  | 3.27524400  |
| N  | 5.79377900  | 0.76141600  | 1.92912400  | H | -3.69292600 | 4.56243600  | 4.99641700  |
| C  | 5.09889500  | 1.05786600  | -0.11723100 | H | 1.11173400  | 5.96086200  | 5.04852900  |
| C  | 4.58499500  | 1.36562400  | 1.96961500  | H | -0.07913100 | 4.63996700  | 5.02167300  |
| N  | 4.13495700  | 1.55677900  | 0.73998900  | H | 5.37290600  | 6.28797200  | -2.53164700 |
| C  | 0.59573600  | 5.24487700  | 4.40193700  | H | 3.37124800  | 3.12713100  | -4.08225500 |
| N  | 1.57947100  | 4.44788700  | 3.70844800  | H | -1.25322700 | 6.49857400  | -3.14639800 |
| C  | 1.19389500  | 3.48680400  | 2.80989400  | H | 2.49587100  | 4.32808400  | 4.11381000  |
| O  | -0.03374600 | 3.52036700  | 2.46537100  | C | 4.88802000  | -6.02642400 | 4.30832000  |
| O  | 2.09887400  | 2.70384200  | 2.38258700  | C | 4.92551600  | -4.96787200 | 3.19863700  |
| C  | -3.35999400 | 4.26758200  | 3.99695300  | C | 4.12694100  | -3.69245800 | 3.53972700  |
| C  | -3.40815600 | 2.77716100  | 3.84249900  | C | 4.63647600  | -2.49609800 | 2.72590500  |
| N  | -2.73862700 | 2.07891600  | 2.84004500  | C | 2.61705300  | -3.89436900 | 3.34096400  |
| C  | -4.10219500 | 1.87940900  | 4.61258600  | C | 6.34287300  | -2.30519300 | -3.75262500 |
| C  | -3.03620800 | 0.79697600  | 3.01113900  | C | 5.33923000  | -2.28710700 | -2.60122500 |
| N  | -3.85757700 | 0.63363800  | 4.06772000  | S | 5.67418600  | -3.59517100 | -1.32919200 |
| C  | -1.64297200 | 5.47566600  | -3.22745200 | C | 0.96502200  | -6.40972700 | -2.17729100 |
| C  | -1.91906700 | 4.87221400  | -1.89236700 | C | 1.63362800  | -5.17518500 | -2.76891800 |
| N  | -2.86211300 | 5.36802100  | -1.00166000 | O | 2.35781700  | -4.43984600 | -2.07645800 |
| C  | -1.35798500 | 3.80152600  | -1.24874100 | C | 0.29869200  | -6.12336200 | -0.83110100 |
| C  | -2.83654400 | 4.60307700  | 0.11809500  | C | -1.02053700 | -5.36428700 | -0.97442100 |
| N  | -1.93100000 | 3.64947400  | -0.00105400 | O | -1.46164700 | -5.01301700 | -2.07308100 |
| C  | 2.30326200  | 3.19407700  | -3.85829300 | N | -1.67390300 | -5.10950100 | 0.18277300  |
| C  | 1.92062100  | 2.19053100  | -2.78040300 | N | 1.46231300  | -4.97541500 | -4.08962800 |
| O  | 2.72444100  | 1.94686900  | -1.84742400 | C | 2.04034600  | -3.83115700 | -4.78097600 |
| O  | 0.74364500  | 1.69850300  | -2.91417800 | H | 5.97366800  | -4.69616800 | 3.01251900  |
| Zn | 2.31613700  | 2.37681100  | 0.32079400  | H | 4.55106300  | -5.38933200 | 2.25505900  |
| Zn | -1.18703300 | 2.31145200  | 1.36272300  | H | 4.29771200  | -3.46672300 | 4.60394500  |
| H  | 4.13598200  | 7.54470600  | -2.66113500 | H | 5.68273800  | -2.27599900 | 2.97639900  |
| H  | 5.29821500  | 7.57735000  | -1.32512000 | H | 4.04193800  | -1.59518900 | 2.92319800  |
| H  | 4.25125800  | 3.93145000  | -1.56214800 | H | 4.60026300  | -2.70178200 | 1.64862600  |
| H  | 2.59100600  | 7.50649300  | -0.11602700 | H | 2.05056100  | -3.00843000 | 3.65293800  |
| H  | 1.33929100  | 5.56626800  | 0.97020600  | H | 2.38811500  | -4.08154200 | 2.28302900  |
| H  | 7.53558500  | -0.08741800 | -0.87320800 | H | 2.24175500  | -4.74655100 | 3.91869200  |
| H  | 7.36278900  | -1.21954800 | 0.47139300  | H | 3.86427900  | -6.34872500 | 4.53290500  |
| H  | 4.95417700  | 1.09201800  | -1.18596300 | H | 5.35721300  | -1.32127100 | -2.08773100 |
| H  | 6.32997000  | 0.46955600  | 2.73449000  | H | 4.31838900  | -2.44467600 | -2.95647000 |
| H  | 4.06041000  | 1.65413200  | 2.86639100  | H | 4.51581900  | -4.26941000 | -1.49494500 |
| H  | -2.34172900 | 4.63768500  | 3.84409800  | H | 7.36817100  | -2.17277400 | -3.39007800 |
| H  | -4.73475900 | 2.01808200  | 5.47587400  | H | 0.98410500  | -5.53988500 | -0.20456400 |
| H  | -4.17510100 | -0.26022900 | 4.41773300  | H | 0.10548000  | -7.06440000 | -0.30130300 |
| H  | -2.64474900 | -0.00457800 | 2.40512300  | H | -1.32199300 | -5.40252400 | 1.08144300  |
| H  | -0.89774400 | 4.87040200  | -3.74973000 | H | -2.57294900 | -4.63452300 | 0.12854600  |
| H  | -2.53954500 | 5.51240000  | -3.85867000 | H | 0.23834200  | -6.83656900 | -2.87402200 |
| H  | -0.60005000 | 3.11936200  | -1.60229200 | H | 3.12074000  | -3.80470900 | -4.61654500 |
| H  | -3.47777500 | 6.15297700  | -1.16397600 | H | 1.59647600  | -2.89640000 | -4.42211100 |
| H  | -3.47382900 | 4.76904600  | 0.97336000  | H | 0.74052700  | -5.50560100 | -4.55674000 |
| H  | -0.01512400 | 5.80431500  | 3.68805100  | H | 1.75981600  | -7.15145500 | -2.02815900 |
| H  | 1.71816200  | 3.03582400  | -4.76636900 | H | 1.84871000  | -3.93617500 | -5.85075200 |
| H  | 2.10543700  | 4.20541800  | -3.48349900 | H | 6.30538800  | -3.25511800 | -4.29509700 |

|   |             |             |             |   |             |             |             |
|---|-------------|-------------|-------------|---|-------------|-------------|-------------|
| H | 6.12616500  | -1.49357800 | -4.45917000 | H | 0.34498300  | 0.82451300  | -1.99855100 |
| H | 5.32249100  | -5.63528300 | 5.23627200  | C | -1.89021600 | -2.66834200 | -5.27544400 |
| H | 5.45730000  | -6.91897300 | 4.02563100  | C | -3.19027200 | -2.41697400 | -4.53593800 |
| C | -5.39971500 | -3.71669400 | 6.77578700  | O | -4.29732600 | -2.58021500 | -5.04497600 |
| C | -4.28614400 | -4.59805900 | 6.18518600  | N | -2.99709400 | -1.97739100 | -3.26024100 |
| C | -3.63741700 | -3.96577300 | 4.97305300  | C | -4.07188400 | -1.58265200 | -2.37610300 |
| C | -2.47337800 | -3.19359200 | 5.09464500  | C | -4.02992800 | -0.05868500 | -2.17563100 |
| C | -4.21612900 | -4.09888600 | 3.70257100  | O | -3.01474200 | 0.45751700  | -1.67747000 |
| C | -1.90260100 | -2.57402100 | 3.98027400  | C | -3.88442200 | -2.26244000 | -1.00474100 |
| C | -3.65414500 | -3.47905000 | 2.58565000  | O | -3.86898500 | -3.67576400 | -1.10131500 |
| C | -2.49027100 | -2.71432800 | 2.71950200  | N | -5.09433600 | 0.69997300  | -2.51431800 |
| H | -4.70736900 | -5.57334700 | 5.91130300  | C | -6.34213000 | 0.28866400  | -3.20809300 |
| H | -3.52791100 | -4.78953900 | 6.95423000  | C | -6.12709900 | 0.09739800  | -4.71449700 |
| H | -2.00517900 | -3.08591700 | 6.07105500  | C | -7.28490400 | 1.45917400  | -2.86654200 |
| H | -5.11646400 | -4.69895500 | 3.58764800  | C | -6.35684600 | 2.68574600  | -2.86188600 |
| H | -0.99619200 | -1.98410100 | 4.09166400  | C | -5.05122500 | 2.15051400  | -2.25281700 |
| H | -4.12256800 | -3.59870600 | 1.61235500  | H | -4.14805000 | 2.58798600  | -2.68857000 |
| H | -5.00317000 | -2.74612400 | 7.09687700  | H | -4.99717800 | 2.31725200  | -1.16953200 |
| H | -6.18688200 | -3.53002900 | 6.03643200  | H | -6.18688000 | 3.03720100  | -3.88536000 |
| H | -5.86091800 | -4.19643100 | 7.64614800  | H | -6.76596500 | 3.52472400  | -2.29065500 |
| N | -0.18116700 | -0.15224800 | -1.13707000 | H | -8.10881400 | 1.54344200  | -3.58071800 |
| C | 0.31551300  | -1.39844600 | -1.64074000 | H | -7.71641400 | 1.31060400  | -1.86923500 |
| O | -0.26969400 | -1.99093600 | -2.55263700 | H | -6.71421800 | -0.64226100 | -2.76998100 |
| N | 1.47238200  | -1.82126900 | -1.10955100 | H | -5.72471300 | 1.00846100  | -5.17259900 |
| C | 2.15852000  | -1.11275500 | -0.03637600 | H | -5.45034500 | -0.73463500 | -4.92320700 |
| C | 1.12986000  | -0.59922800 | 0.96482000  | H | -7.08647100 | -0.12770700 | -5.19612800 |
| C | 0.09966200  | 0.36135900  | 0.33983400  | H | -4.99980400 | -1.92774100 | -2.83165500 |
| O | -1.05989900 | 0.38242300  | 1.02682800  | H | -3.16769600 | -3.94219400 | -1.73847700 |
| H | 2.74934300  | -0.29156900 | -0.45236800 | H | -4.72169400 | -2.00075300 | -0.34778600 |
| H | 2.85141500  | -1.81281100 | 0.43507200  | H | -2.96561200 | -1.87270900 | -0.54350800 |
| H | 1.60946300  | -0.06814300 | 1.79316700  | H | -2.03299000 | -1.84447900 | -2.94442300 |
| H | 0.58716700  | -1.45413800 | 1.38146500  | H | -1.37866700 | -1.71911600 | -5.47170800 |
| H | -1.19766100 | -0.07917800 | -1.31089200 | H | -1.21744300 | -3.28580400 | -4.67301300 |
| H | 1.83736000  | -2.70112000 | -1.47727700 | H | -2.11217600 | -3.15930700 | -6.22478100 |
| O | 0.55397200  | 1.66163100  | 0.17244500  | H | -2.04320600 | -2.22700700 | 1.85688900  |

#### Y172F *SkDHPase*.DHU-EP-II

|   |             |             |             |   |             |             |             |
|---|-------------|-------------|-------------|---|-------------|-------------|-------------|
| C | -8.42324300 | -0.66453600 | -3.47860600 | N | -5.35376900 | -2.02482900 | 2.56098800  |
| C | -7.43862000 | -0.76494100 | -2.37211300 | C | -4.17371500 | -1.63290600 | 1.96009000  |
| N | -7.56584900 | -1.60693200 | -1.27731400 | O | -3.30048300 | -2.56320000 | 1.85016900  |
| C | -6.24750100 | -0.12692000 | -2.18330700 | O | -4.09659600 | -0.43620800 | 1.56420600  |
| C | -6.47598600 | -1.45330900 | -0.48506700 | C | -2.14241200 | -5.69373700 | 3.03873400  |
| N | -5.65151700 | -0.56531000 | -1.01679500 | C | -0.94589200 | -4.80258600 | 3.19711900  |
| C | -5.19143100 | 5.70805400  | -0.17183900 | N | -0.62025200 | -3.79276600 | 2.29431900  |
| C | -4.75653100 | 4.31860200  | 0.16345600  | C | 0.00379200  | -4.81607100 | 4.18550600  |
| N | -4.50418300 | 3.89847800  | 1.46183500  | C | 0.49661200  | -3.22598400 | 2.73669100  |
| C | -4.50627800 | 3.21484800  | -0.60916100 | N | 0.90511700  | -3.81709400 | 3.87378500  |
| C | -4.12563500 | 2.59890500  | 1.43623500  | C | -3.07114300 | -4.46422100 | -4.32505400 |
| N | -4.11573500 | 2.15638200  | 0.19099100  | C | -2.66478400 | -4.50567300 | -2.89107000 |
| C | -5.48553100 | -3.33291600 | 3.16918100  | N | -2.61696500 | -5.66175900 | -2.12349400 |

|    |             |             |             |   |             |             |             |
|----|-------------|-------------|-------------|---|-------------|-------------|-------------|
| C  | -2.29581100 | -3.49979700 | -2.04012500 | C | 5.45683900  | 4.20834800  | -0.48240000 |
| C  | -2.23471800 | -5.33235200 | -0.86839600 | C | 6.37198600  | 3.03541200  | -0.82776100 |
| N  | -2.03642200 | -4.02492600 | -0.78428000 | O | 6.45479400  | 2.56300300  | -1.96573700 |
| C  | -3.80958000 | 0.06698500  | -4.64008800 | N | 7.12419700  | 2.56245800  | 0.19816400  |
| C  | -3.03907300 | 0.06188800  | -3.31862900 | N | 3.03774300  | 4.70860500  | -3.27628600 |
| O  | -3.52809900 | 0.82402600  | -2.38632600 | C | 1.65384600  | 4.63358800  | -3.71641800 |
| O  | -2.05347900 | -0.67895400 | -3.21158100 | H | -1.62779800 | 5.89665400  | 4.48746500  |
| Zn | -3.83350800 | 0.25351700  | -0.47216300 | H | -1.27631500 | 7.42494300  | 3.68895000  |
| Zn | -1.67341600 | -2.83997400 | 0.80628400  | H | 0.73031300  | 5.13313900  | 3.93716300  |
| H  | -8.55126600 | -1.61856400 | -4.00578600 | H | -1.22439400 | 4.37014800  | 2.61176300  |
| H  | -9.41338900 | -0.34637200 | -3.12817300 | H | 0.17814900  | 4.60460000  | 1.55089000  |
| H  | -5.75963700 | 0.60763500  | -2.80047700 | H | -1.11784400 | 5.80775100  | 1.58127700  |
| H  | -8.34150100 | -2.22818900 | -1.09291300 | H | 1.93653900  | 6.30230300  | 2.07902900  |
| H  | -6.32930400 | -1.97057700 | 0.45263700  | H | 0.74677700  | 7.61277600  | 2.12669600  |
| H  | -5.41350500 | 5.77903600  | -1.23962400 | H | 1.82189500  | 7.34049400  | 3.50758600  |
| H  | -4.40739200 | 6.44000500  | 0.05568300  | H | 0.56753200  | 7.86911500  | 5.37285900  |
| H  | -4.56386500 | 3.09767000  | -1.68022300 | H | -2.90411400 | 4.64993700  | -3.09143700 |
| H  | -4.55681500 | 4.47706900  | 2.28900800  | H | -1.30948900 | 5.02541100  | -3.72178500 |
| H  | -3.89421000 | 2.00663000  | 2.30810400  | H | -0.24015500 | 5.61874800  | -1.38459100 |
| H  | -3.02805500 | -5.10451600 | 2.78301300  | H | -3.22382500 | 7.06770800  | -2.41473300 |
| H  | 0.11448600  | -5.43843400 | 5.05987200  | H | 4.62986700  | 3.81133700  | 0.11638000  |
| H  | 1.69337400  | -3.50903800 | 4.42897100  | H | 6.00947600  | 4.90843600  | 0.15414200  |
| H  | 1.00521000  | -2.39653700 | 2.27200500  | H | 6.90495400  | 2.81957100  | 1.14964700  |
| H  | -2.96303800 | -3.43932500 | -4.68916000 | H | 7.61018700  | 1.68068900  | 0.03811000  |
| H  | -2.44482200 | -5.11121300 | -4.95138000 | H | 5.48427800  | 4.64948800  | -2.59896200 |
| H  | -2.18898800 | -2.44502100 | -2.26491500 | H | 1.22817000  | 5.63249800  | -3.88327200 |
| H  | -2.81434800 | -6.59867800 | -2.44795600 | H | 1.07367400  | 4.12510700  | -2.94566800 |
| H  | -2.11388900 | -6.04824000 | -0.06966000 | H | 3.75504800  | 4.85696300  | -3.97191900 |
| H  | -5.32560000 | -4.11385700 | 2.42144900  | H | 1.59282700  | 4.06546900  | -4.64905200 |
| H  | -3.15213600 | -0.22125300 | -5.46382400 | H | -1.61176500 | 7.45488100  | -3.03030900 |
| H  | -4.62282000 | -0.66740200 | -4.57988100 | H | -2.88030800 | 6.93751600  | -4.15329900 |
| H  | -6.09696200 | 5.99507700  | 0.37646500  | H | 0.24906800  | 6.29990800  | 6.12574400  |
| H  | -1.98754600 | -6.44362300 | 2.25167200  | H | -0.97217300 | 7.57988100  | 6.18629100  |
| H  | -2.34138100 | -6.23598800 | 3.96740000  | C | 4.39052200  | -2.43906200 | 7.74720100  |
| H  | -6.50033800 | -3.43620900 | 3.56450700  | C | 4.05798600  | -0.94713300 | 7.57691200  |
| H  | -4.77378500 | -3.49464700 | 3.98893700  | C | 3.00136300  | -0.69205400 | 6.52234200  |
| H  | -8.07913500 | 0.07228000  | -4.20865800 | C | 1.65274100  | -0.53702500 | 6.87255500  |
| H  | -4.25694100 | 1.04428300  | -4.84730100 | C | 3.34644800  | -0.62038600 | 5.16405100  |
| H  | -4.11520700 | -4.77095600 | -4.46607100 | C | 0.67877600  | -0.30593200 | 5.89926900  |
| H  | -5.92696500 | -1.26664500 | 2.90450500  | C | 2.37990600  | -0.38407600 | 4.18339200  |
| C  | -0.20741000 | 7.11623200  | 5.55267100  | C | 1.04038100  | -0.22428700 | 4.55302800  |
| C  | -0.81330700 | 6.59501900  | 4.24325500  | H | 4.97457500  | -0.40427100 | 7.31419400  |
| C  | 0.19516100  | 5.87564700  | 3.32498500  | H | 3.72054000  | -0.54050200 | 8.53792200  |
| C  | -0.53325600 | 5.12094900  | 2.20613300  | H | 1.36618400  | -0.58309900 | 7.92119900  |
| C  | 1.23612200  | 6.83723200  | 2.73108600  | H | 4.38949700  | -0.72627300 | 4.87246100  |
| C  | -2.46591200 | 6.77929500  | -3.14955200 | H | -0.35940500 | -0.17658800 | 6.19505500  |
| C  | -2.04852300 | 5.32215500  | -2.97174600 | H | 2.67246000  | -0.30354400 | 3.13838500  |
| S  | -1.39530800 | 4.92524800  | -1.29491200 | H | 3.50268900  | -3.00845200 | 8.04670900  |
| C  | 4.89579200  | 4.92450800  | -1.71817400 | H | 4.76587900  | -2.86893100 | 6.81108800  |
| C  | 3.41101700  | 4.66465300  | -1.97059500 | H | 5.15868500  | -2.58389300 | 8.51473900  |
| O  | 2.59509500  | 4.49144200  | -1.05829600 | C | 4.59447400  | 1.13784200  | -4.23319900 |

|   |             |             |             |   |            |             |             |
|---|-------------|-------------|-------------|---|------------|-------------|-------------|
| C | 5.15504900  | -0.21118100 | -3.81563300 | H | 0.31464300 | 0.38501400  | -1.56764800 |
| O | 5.64576200  | -0.99935100 | -4.62217400 | H | 3.11679600 | -4.71805500 | -1.04000700 |
| N | 5.10437900  | -0.46021100 | -2.47125700 | H | 4.64846600 | -5.01345400 | -0.22710600 |
| C | 5.89498300  | -1.52300800 | -1.86341600 | H | 3.49681700 | -6.42885700 | -2.63353300 |
| C | 5.01859100  | -2.63279700 | -1.25382200 | H | 4.75198300 | -7.01533400 | -1.54621300 |
| O | 4.54189600  | -2.49110200 | -0.11286700 | H | 5.43641000 | -6.22052000 | -4.08342800 |
| C | 6.77452900  | -0.91379600 | -0.75028200 | H | 6.48693000 | -5.79312100 | -2.72331800 |
| O | 7.69401800  | 0.04073700  | -1.25888500 | H | 6.03354800 | -3.60675000 | -3.65221800 |
| N | 4.82060800  | -3.79364500 | -1.92294200 | H | 3.08771200 | -4.43288800 | -3.95598700 |
| C | 5.16779500  | -4.17555900 | -3.31092000 | H | 3.79786800 | -2.84722800 | -4.35010100 |
| C | 4.00036700  | -3.91787700 | -4.27677100 | H | 4.26380300 | -4.27509900 | -5.27869000 |
| C | 5.47919200  | -5.67259500 | -3.13739300 | H | 6.53994200 | -1.91673800 | -2.65007200 |
| C | 4.42093200  | -6.14451600 | -2.11957600 | H | 7.19746600 | 0.73309900  | -1.74845600 |
| C | 4.18118600  | -4.91718400 | -1.21181000 | H | 7.37093500 | -1.70133000 | -0.27844600 |
| O | 4.02831600  | 1.26504800  | -0.36426200 | H | 6.12062500 | -0.47729700 | 0.01446400  |
| C | 2.88848400  | 0.90179400  | -0.01688700 | H | 4.72575000 | 0.24666400  | -1.83494500 |
| N | 2.64443900  | -0.36090100 | 0.46618600  | H | 4.28181800 | 1.08514500  | -5.27818200 |
| C | 0.47384400  | 1.47425200  | 0.31839100  | H | 3.75672100 | 1.45072800  | -3.60177600 |
| C | -0.34597200 | 0.67327200  | -0.74274900 | H | 5.38228500 | 1.88957200  | -4.12341000 |
| C | -0.93066300 | -0.60316800 | -0.19957900 | N | 1.83617900 | 1.77228100  | -0.06639900 |
| O | -2.17138600 | -0.86758800 | -0.27071800 | H | 2.06495600 | 2.70006800  | -0.41816500 |
| O | -0.17928200 | -1.46545700 | 0.36628800  | H | 3.40903800 | -1.02346700 | 0.31674600  |
| H | 1.71448200  | -0.76232000 | 0.38050200  | H | 4.98844800 | 6.01089900  | -1.59004600 |
| H | -0.02653300 | 2.42885100  | 0.49467600  | H | 0.28565300 | -0.02393200 | 3.79605900  |
| H | 0.48145400  | 0.93544500  | 1.27351900  |   |            |             |             |
| H | -1.14223300 | 1.27699900  | -1.18008300 |   |            |             |             |

**(5R)-MeHYD-ES-II (SkDHPase)**

|   |             |            |             |    |             |             |             |
|---|-------------|------------|-------------|----|-------------|-------------|-------------|
| C | 4.43043300  | 7.44188000 | -1.61543500 | N  | -4.76624200 | 0.82247100  | 2.89804900  |
| C | 3.76398500  | 6.45838100 | -0.72508800 | C  | -1.91028700 | 5.99596500  | -2.84167000 |
| N | 3.16918900  | 6.76390000 | 0.48998200  | C  | -2.17819000 | 5.20837200  | -1.60801300 |
| C | 3.55501500  | 5.12028200 | -0.88943700 | N  | -3.19441900 | 5.44422100  | -0.69180600 |
| C | 2.63167900  | 5.62827200 | 1.00320300  | C  | -1.49879700 | 4.13566000  | -1.10983000 |
| N | 2.84270300  | 4.61404300 | 0.18077300  | C  | -3.09188200 | 4.52612400  | 0.30334300  |
| C | 7.36528000  | 0.24160200 | -0.37772200 | N  | -2.06766200 | 3.71879300  | 0.07738100  |
| C | 6.03861500  | 0.68876600 | 0.14427500  | C  | 2.06023900  | 3.90494500  | -3.86094600 |
| N | 5.68850400  | 0.60076000 | 1.48505700  | C  | 1.71301700  | 2.91088100  | -2.74955000 |
| C | 4.94497100  | 1.25326600 | -0.46122200 | O  | 2.64687800  | 2.63576800  | -1.91172200 |
| C | 4.44091700  | 1.10160100 | 1.64514600  | O  | 0.53899300  | 2.48251100  | -2.68567600 |
| N | 3.96204600  | 1.50496000 | 0.48001100  | Zn | 2.25930100  | 2.61766500  | 0.16645300  |
| C | 0.60029600  | 4.94474700 | 4.63259400  | Zn | -1.08410100 | 2.36583100  | 1.30224900  |
| N | 1.55712200  | 4.22453200 | 3.81898200  | H  | 3.74196500  | 8.22606700  | -1.95213600 |
| C | 1.12367900  | 3.27112800 | 2.92185100  | H  | 5.28029600  | 7.93634600  | -1.13016600 |
| O | -0.14623700 | 3.23431700 | 2.76407900  | H  | 3.83978400  | 4.47790500  | -1.70444700 |
| O | 1.99405200  | 2.57410800 | 2.33009400  | H  | 3.14143500  | 7.67338200  | 0.92679000  |
| C | -3.34492100 | 3.91891900 | 4.24545600  | H  | 2.13101200  | 5.57135600  | 1.95895400  |
| C | -3.70539400 | 2.64599000 | 3.53033700  | H  | 7.45047100  | 0.50164300  | -1.43474200 |
| N | -2.99203400 | 2.06544700 | 2.47344800  | H  | 7.49710600  | -0.84138600 | -0.28731900 |
| C | -4.80201200 | 1.86704100 | 3.79733900  | H  | 4.78343800  | 1.50931600  | -1.49654400 |
| C | -3.66880100 | 0.97902100 | 2.12582200  | H  | 6.25700800  | 0.19676100  | 2.21504900  |

|   |             |             |             |   |             |             |             |
|---|-------------|-------------|-------------|---|-------------|-------------|-------------|
| H | 3.92025200  | 1.18327700  | 2.58620300  | H | 4.38715700  | -4.08415700 | -2.21996800 |
| H | -2.32068400 | 3.87697400  | 4.62540700  | H | 7.44177000  | -1.68487500 | -3.62560000 |
| H | -5.58037600 | 1.96706000  | 4.53707800  | H | -1.16834300 | -4.38133800 | -1.95580200 |
| H | -5.40663600 | 0.04399100  | 2.85280000  | H | 0.11622800  | -4.46359500 | -0.74972900 |
| H | -3.42356500 | 0.31382500  | 1.31215600  | H | 0.39002100  | -7.31418200 | -0.38255700 |
| H | -1.09707600 | 5.51818800  | -3.39093600 | H | -1.11693600 | -7.85128000 | 0.28728800  |
| H | -2.78088600 | 6.03986600  | -3.50640200 | H | 0.00077900  | -6.09603600 | -3.34262400 |
| H | -0.66077200 | 3.63300100  | -1.56350400 | H | 3.22463900  | -3.38006700 | -4.98924400 |
| H | -3.89400300 | 6.16985200  | -0.74833600 | H | 1.93690200  | -2.22646900 | -4.54232900 |
| H | -3.76379200 | 4.47165400  | 1.14534300  | H | 0.75451500  | -4.78934800 | -4.94811200 |
| H | -0.14819800 | 5.41528900  | 3.99391000  | H | 1.21916800  | -6.33512700 | -2.09242900 |
| H | 1.36184800  | 3.81036100  | -4.69407800 | H | 1.84420600  | -3.11854400 | -6.07978000 |
| H | 1.98387300  | 4.91978600  | -3.45335900 | H | 6.36974600  | -2.13628000 | -4.95583600 |
| H | 8.19174500  | 0.72804300  | 0.15249700  | H | 6.27353800  | -0.51110900 | -4.25259500 |
| H | -3.40573000 | 4.79131600  | 3.58423200  | H | 6.29015500  | -6.56994400 | 3.63768100  |
| H | -4.02730200 | 4.08148500  | 5.08238800  | H | 4.52463000  | -6.63694600 | 3.63498600  |
| H | 1.12428300  | 5.72431100  | 5.19256800  | C | -4.89294400 | -4.26222900 | 6.71815800  |
| H | 0.07620400  | 4.29895300  | 5.34897000  | C | -3.50043200 | -4.84126000 | 6.42492700  |
| H | 4.80845100  | 6.93028300  | -2.50262800 | C | -2.97313100 | -4.25885500 | 5.13791400  |
| H | 3.08546200  | 3.76592000  | -4.21394600 | C | -2.43353900 | -2.96799500 | 5.12231700  |
| H | -1.61224400 | 7.02765600  | -2.61946100 | C | -3.15184100 | -4.91650900 | 3.91437400  |
| H | 2.49665400  | 4.09446300  | 4.16421600  | C | -2.12472300 | -2.33032700 | 3.92473900  |
| C | 5.38262600  | -5.96800400 | 3.75786000  | C | -2.84523600 | -4.30024100 | 2.70367100  |
| C | 5.34398000  | -4.82489900 | 2.73554300  | C | -2.35753500 | -2.99222500 | 2.71484600  |
| C | 6.57387400  | -3.89815300 | 2.79206800  | O | -2.11325300 | -2.38159500 | 1.51271800  |
| C | 6.58365700  | -2.93210400 | 1.60138900  | H | -3.55944400 | -5.93334200 | 6.35531200  |
| C | 6.66555200  | -3.12376800 | 4.11563900  | H | -2.82415900 | -4.61320200 | 7.25775600  |
| C | 6.42717900  | -1.57103500 | -4.02151100 | H | -2.27283100 | -2.44380900 | 6.06165800  |
| C | 5.37959000  | -2.04990100 | -3.02094400 | H | -3.56060100 | -5.92414800 | 3.90694600  |
| S | 5.66042500  | -3.82771800 | -2.58928600 | H | -1.71376700 | -1.32361100 | 3.92089400  |
| C | 0.54243300  | -5.59449700 | -2.53403400 | H | -2.98742900 | -4.80907000 | 1.75526800  |
| C | 1.44592800  | -4.48057400 | -3.06278500 | H | -1.86738800 | -1.45723500 | 1.68623400  |
| O | 2.19326300  | -3.85281100 | -2.29828200 | H | -4.84790800 | -3.17276800 | 6.81641000  |
| C | -0.44619300 | -5.05128100 | -1.48508500 | H | -5.58783100 | -4.49385500 | 5.90462700  |
| C | -1.25823200 | -6.08779900 | -0.71696500 | H | -5.31115500 | -4.66739300 | 7.64631700  |
| O | -2.45568800 | -5.92414200 | -0.46891900 | N | -0.81182000 | -0.60451400 | -0.68170400 |
| N | -0.60315200 | -7.19048500 | -0.27675000 | C | 0.04893100  | -1.36085000 | -1.50458900 |
| N | 1.39546300  | -4.24773400 | -4.38897900 | O | -0.25221000 | -1.79067800 | -2.61113300 |
| C | 2.15074900  | -3.17808500 | -5.03503000 | N | 1.20388800  | -1.52870300 | -0.81656400 |
| H | 5.27317100  | -5.24942200 | 1.72594000  | C | 1.12409900  | -0.99206000 | 0.53931300  |
| H | 4.43350700  | -4.22467100 | 2.88156800  | C | -0.26628100 | -0.36132300 | 0.51991800  |
| H | 7.46786600  | -4.53418100 | 2.71221000  | O | -0.86432700 | 0.16877900  | 1.48123000  |
| H | 6.56793400  | -3.46149000 | 0.64294600  | H | 1.85156200  | -0.18938400 | 0.68931700  |
| H | 7.48064700  | -2.30087700 | 1.61990700  | H | -1.79695600 | -0.37996600 | -0.91639800 |
| H | 5.70426900  | -2.27516800 | 1.62698800  | H | 1.85952000  | -2.23302700 | -1.14660800 |
| H | 7.55128600  | -2.47834200 | 4.13304400  | O | 0.41059700  | 2.05014300  | 0.01183900  |
| H | 5.78170600  | -2.48702300 | 4.25664600  | H | 0.26509500  | 2.02758300  | -0.95945100 |
| H | 6.73248200  | -3.78814900 | 4.98154000  | C | -1.83371800 | -2.12082000 | -5.30705000 |
| H | 5.36154700  | -5.60020000 | 4.78818200  | C | -3.18445700 | -1.98955200 | -4.63521400 |
| H | 5.41248900  | -1.45144300 | -2.10642600 | O | -4.24741100 | -2.11671700 | -5.23711300 |
| H | 4.37422700  | -1.96317500 | -3.43699200 | N | -3.09410100 | -1.69869800 | -3.30487200 |



|   |             |             |             |   |             |             |             |
|---|-------------|-------------|-------------|---|-------------|-------------|-------------|
| C | -4.24190700 | -1.76481700 | -2.42384600 | H | -6.90624300 | -0.90097100 | -2.86736900 |
| C | -4.39461500 | -0.40555500 | -1.73241600 | H | -5.74518300 | 1.43863100  | -4.49449000 |
| O | -3.51335300 | -0.02001600 | -0.92596400 | H | -5.40362500 | -0.29217300 | -4.74935400 |
| C | -4.08829800 | -2.88155700 | -1.37256600 | H | -7.01995700 | 0.34116900  | -5.05298200 |
| O | -3.84688500 | -4.08602200 | -2.05986200 | H | -5.09377600 | -1.99982500 | -3.06187900 |
| N | -5.45777800 | 0.37267000  | -1.98729900 | H | -3.46735500 | -4.73470500 | -1.43484300 |
| C | -6.56948700 | 0.13550200  | -2.95136900 | H | -5.01866400 | -2.91990000 | -0.77731600 |
| C | -6.14710800 | 0.42496900  | -4.39667900 | H | -3.27764200 | -2.62762700 | -0.67849600 |
| C | -7.64624600 | 1.10108900  | -2.42081200 | H | -2.15920900 | -1.72806500 | -2.90491400 |
| C | -6.83899000 | 2.31070000  | -1.92261000 | H | -1.18427500 | -1.27759100 | -5.06055300 |
| C | -5.58336500 | 1.67718800  | -1.30536600 | H | -1.32908400 | -3.02616700 | -4.95637900 |
| H | -4.67346000 | 2.26629800  | -1.44648800 | H | -1.98160000 | -2.18135100 | -6.38566500 |
| H | -5.69430800 | 1.50869300  | -0.22769900 | C | 1.27493900  | -2.04731100 | 1.64026800  |
| H | -6.56656200 | 2.95804900  | -2.76211900 | H | 2.26861000  | -2.50165600 | 1.58996400  |
| H | -7.38838400 | 2.92120000  | -1.20122900 | H | 1.15969900  | -1.57484300 | 2.61903600  |
| H | -8.37855000 | 1.35720400  | -3.18991200 | H | 0.51832900  | -2.82852800 | 1.54068200  |
| H | -8.18348100 | 0.63743000  | -1.58568800 |   |             |             |             |

**(5R)-MeHYD-TS1-II (SkDHPase)**

|   |             |             |             |    |             |             |             |
|---|-------------|-------------|-------------|----|-------------|-------------|-------------|
| C | 1.11654800  | 8.62024800  | -1.24607900 | O  | -0.28981300 | 2.53028300  | -2.59162700 |
| C | 0.70641400  | 7.40332600  | -0.49471800 | Zn | 0.94316300  | 3.27866100  | 0.36440300  |
| N | -0.32351500 | 7.35605500  | 0.43467600  | Zn | -2.15329000 | 1.64368200  | 1.25206400  |
| C | 1.17816900  | 6.12355300  | -0.55491200 | H  | 0.30086100  | 9.01825600  | -1.86087000 |
| C | -0.43641400 | 6.08181800  | 0.88778400  | H  | 1.45363400  | 9.42496300  | -0.58239100 |
| N | 0.45903400  | 5.30793000  | 0.29920500  | H  | 1.95318200  | 5.71290200  | -1.17913800 |
| C | 6.60907300  | 3.20181800  | 0.32316300  | H  | -0.89502700 | 8.13457600  | 0.72826200  |
| C | 5.17498100  | 3.13227000  | 0.72892800  | H  | -1.15900700 | 5.76704500  | 1.62407200  |
| N | 4.77137600  | 3.02155000  | 2.05290000  | H  | 6.68130100  | 3.29791600  | -0.76180000 |
| C | 4.00721700  | 3.16582300  | 0.01232900  | H  | 7.16005800  | 2.30044600  | 0.61411600  |
| C | 3.41921900  | 2.99890700  | 2.09687700  | H  | 3.85136500  | 3.24695500  | -1.05188100 |
| N | 2.92611600  | 3.08339900  | 0.87187400  | H  | 5.38419900  | 2.96513000  | 2.85321200  |
| C | -1.88073600 | 4.62409800  | 4.66920300  | H  | 2.82574600  | 2.92760700  | 2.99429600  |
| N | -0.64813500 | 4.35428500  | 3.95836600  | H  | -4.11403800 | 2.49052300  | 4.41708400  |
| C | -0.61114900 | 3.46009200  | 2.92271900  | H  | -6.18316300 | -0.65609300 | 4.18953100  |
| O | -1.76152400 | 3.07967000  | 2.50289200  | H  | -5.04765200 | -2.30780100 | 2.59116500  |
| O | 0.51638400  | 3.13476800  | 2.44777000  | H  | -3.29721600 | -1.18766900 | 1.15725300  |
| C | -5.01994200 | 2.09553100  | 3.94901400  | H  | -2.97235600 | 4.71175100  | -3.46956600 |
| C | -4.74879500 | 0.78631000  | 3.26611600  | H  | -4.69475800 | 4.45537700  | -3.76286600 |
| N | -3.78726000 | 0.58083700  | 2.27170200  | H  | -1.94332200 | 3.06748300  | -1.61771600 |
| C | -5.39606600 | -0.39960700 | 3.49843600  | H  | -6.01305100 | 3.95394900  | -1.15459700 |
| C | -3.87867600 | -0.69739700 | 1.92310700  | H  | -5.35634000 | 2.38562600  | 0.74146000  |
| N | -4.83671800 | -1.32194000 | 2.63859100  | H  | -2.67549300 | 4.86194400  | 3.96110300  |
| C | -3.96013700 | 4.75710600  | -3.00745800 | H  | 0.04039000  | 4.13953700  | -4.52993500 |
| C | -3.97427800 | 3.86360000  | -1.81705500 | H  | 0.09041600  | 5.37491600  | -3.25014700 |
| N | -5.07810600 | 3.59822800  | -1.01832100 | H  | 7.11643900  | 4.06472200  | 0.76949300  |
| C | -2.95373600 | 3.15443200  | -1.25200000 | H  | -5.37443300 | 2.85763600  | 3.24537800  |
| C | -4.69348100 | 2.76149200  | -0.02198700 | H  | -5.78333200 | 1.96567300  | 4.71912600  |
| N | -3.40571000 | 2.47713100  | -0.13706500 | H  | -1.73016700 | 5.48147600  | 5.33034300  |
| C | 0.58816000  | 4.48458600  | -3.65173000 | H  | -2.21319900 | 3.77416100  | 5.27929700  |
| C | 0.60172400  | 3.41137800  | -2.56581700 | H  | 1.94413600  | 8.37227800  | -1.91326200 |
| O | 1.49300400  | 3.52496200  | -1.64997000 | H  | 1.60349600  | 4.77551700  | -3.93290600 |

|   |             |             |             |   |             |             |             |
|---|-------------|-------------|-------------|---|-------------|-------------|-------------|
| H | -4.16666400 | 5.80136500  | -2.74427500 | C | -1.28364100 | -5.59296800 | 3.80444400  |
| H | 0.23577200  | 4.55606400  | 4.39947500  | C | -1.41928500 | -2.81572300 | 3.90786600  |
| C | 6.98039600  | -3.38182700 | 4.33699700  | C | -1.14984600 | -4.85935900 | 2.63046200  |
| C | 6.56686500  | -2.32692500 | 3.30264700  | C | -1.23779700 | -3.46432400 | 2.68140000  |
| C | 7.58799000  | -2.05910600 | 2.18172000  | O | -1.13866600 | -2.77791700 | 1.50467000  |
| C | 6.98668500  | -1.11646500 | 1.12971600  | H | -1.25294000 | -6.73136600 | 6.24936200  |
| C | 8.91519700  | -1.50052300 | 2.71475900  | H | -1.47531400 | -5.25176300 | 7.17392700  |
| C | 6.80065600  | 1.25857500  | -3.36871400 | H | -1.70204500 | -3.06303800 | 6.02140200  |
| C | 6.21321800  | 0.13795700  | -2.51703600 | H | -1.23091500 | -6.67835700 | 3.75836400  |
| S | 7.10343600  | -1.44746100 | -2.84863100 | H | -1.45667100 | -1.72989500 | 3.94481900  |
| C | 2.93531000  | -4.68704900 | -2.18586300 | H | -0.97410500 | -5.34646800 | 1.67648600  |
| C | 3.38148100  | -3.32625100 | -2.72405100 | H | -1.16734300 | -1.81375600 | 1.67222800  |
| O | 3.81741000  | -2.44964900 | -1.96263000 | H | -3.88088600 | -5.13644700 | 6.41846500  |
| C | 1.77674500  | -4.54200400 | -1.18142500 | H | -3.65719100 | -6.62084000 | 5.48564000  |
| C | 1.40284300  | -5.80807800 | -0.42126200 | H | -3.55437600 | -6.66450900 | 7.25382300  |
| O | 0.23659700  | -6.19783600 | -0.32022600 | N | -0.43920200 | -0.68884800 | -0.67972200 |
| N | 2.41460200  | -6.48733000 | 0.17601300  | C | 0.70624000  | -1.04509300 | -1.38657800 |
| N | 3.30870900  | -3.16847900 | -4.06055600 | O | 0.71454200  | -1.66416200 | -2.44749200 |
| C | 3.64939700  | -1.91934100 | -4.73549200 | N | 1.78008000  | -0.61529400 | -0.66714500 |
| H | 5.61945400  | -2.63832300 | 2.84110600  | C | 1.38356600  | -0.15484900 | 0.66436100  |
| H | 6.35260000  | -1.37817200 | 3.81745800  | C | -0.14551700 | -0.04274700 | 0.49055600  |
| H | 7.80108900  | -3.01867700 | 1.68712500  | O | -0.98519300 | -0.02228500 | 1.46446100  |
| H | 6.06143900  | -1.52453100 | 0.70694900  | H | 1.80656400  | 0.82362300  | 0.88508900  |
| H | 7.68041000  | -0.94847000 | 0.29989900  | H | -1.39806200 | -0.93711600 | -0.96896300 |
| H | 6.74564100  | -0.14245600 | 1.57795200  | H | 2.68340000  | -1.02432600 | -0.89378200 |
| H | 9.61662300  | -1.30825100 | 1.89625100  | O | -0.37600900 | 1.83596800  | -0.00133100 |
| H | 8.75498700  | -0.55281800 | 3.24529100  | H | -0.41144900 | 1.87034100  | -0.99488700 |
| H | 9.40234900  | -2.19045400 | 3.40969800  | C | -0.38214000 | -2.56376100 | -5.36733300 |
| H | 7.86705100  | -3.07783700 | 4.90157500  | C | -1.69646100 | -3.00669600 | -4.75662900 |
| H | 6.30251300  | 0.37318300  | -1.45278400 | O | -2.58038100 | -3.54015200 | -5.42484300 |
| H | 5.15600000  | -0.01948800 | -2.74002600 | N | -1.82034800 | -2.71720300 | -3.43088200 |
| H | 6.17469600  | -2.23693300 | -2.27059700 | C | -2.92346700 | -3.22492700 | -2.63953800 |
| H | 7.86364200  | 1.41008800  | -3.15507400 | C | -3.69068400 | -2.04401300 | -2.03274900 |
| H | 0.87591200  | -4.20495100 | -1.69539100 | O | -3.13660000 | -1.32246600 | -1.17060500 |
| H | 2.04857100  | -3.77452200 | -0.44706800 | C | -2.42639700 | -4.15533600 | -1.51533100 |
| H | 3.36124000  | -6.14525800 | 0.19551500  | O | -1.67309100 | -5.18433500 | -2.10931800 |
| H | 2.17815200  | -7.29256700 | 0.73659200  | N | -4.95445500 | -1.78497000 | -2.41244200 |
| H | 2.64889000  | -5.36741000 | -2.99450700 | C | -5.77695800 | -2.47106500 | -3.44786600 |
| H | 4.71548700  | -1.70172400 | -4.62684900 | C | -5.41802400 | -2.01215600 | -4.86658900 |
| H | 3.06412100  | -1.09640000 | -4.31619900 | C | -7.20217400 | -2.07490300 | -3.01817600 |
| H | 2.89413900  | -3.90830700 | -4.60582600 | C | -7.03930800 | -0.63665400 | -2.50034500 |
| H | 3.81989700  | -5.11952800 | -1.70423600 | C | -5.67999100 | -0.66236800 | -1.78515900 |
| H | 3.41254700  | -2.02338900 | -5.79495900 | H | -5.10742700 | 0.26332100  | -1.88880100 |
| H | 6.70111800  | 1.04151300  | -4.43610200 | H | -5.78216700 | -0.85913900 | -0.71125100 |
| H | 6.27825100  | 2.20085900  | -3.16807500 | H | -7.01782000 | 0.06771600  | -3.33784000 |
| H | 7.20762500  | -4.34008300 | 3.85581200  | H | -7.84952700 | -0.33017000 | -1.83338700 |
| H | 6.17709100  | -3.55723600 | 5.05978300  | H | -7.91529000 | -2.15951000 | -3.84150600 |
| C | -3.31114300 | -6.07018900 | 6.36620800  | H | -7.54355100 | -2.73035300 | -2.20883500 |
| C | -1.80464600 | -5.78418600 | 6.27372800  | H | -5.63559800 | -3.55163400 | -3.36612300 |
| C | -1.49909500 | -4.96911000 | 5.04122600  | H | -5.48710000 | -0.92337300 | -4.95981400 |
| C | -1.54853000 | -3.57180600 | 5.07225000  | H | -4.41350600 | -2.33602800 | -5.14622500 |

|   |             |             |             |   |             |             |             |
|---|-------------|-------------|-------------|---|-------------|-------------|-------------|
| H | -6.11798300 | -2.45941100 | -5.58052100 | H | -0.04993000 | -3.34307800 | -6.05811900 |
| H | -3.54042200 | -3.80352200 | -3.32731300 | H | -0.55558900 | -1.66073900 | -5.96273300 |
| H | -1.09186900 | -5.58121600 | -1.43139300 | C | 1.75982500  | -1.13431800 | 1.78224600  |
| H | -3.31161300 | -4.54275600 | -0.97821100 | H | 2.84825700  | -1.23469300 | 1.83532600  |
| H | -1.84358800 | -3.57510700 | -0.78923100 | H | 1.40024700  | -0.75743700 | 2.74323900  |
| H | -0.99066300 | -2.36566900 | -2.95661600 | H | 1.31890000  | -2.11854400 | 1.60949600  |
| H | 0.38809200  | -2.35074000 | -4.62725200 |   |             |             |             |

**(5R)-MeHYD-INT1-II (SkDHPase)**

|    |             |             |             |   |             |             |             |
|----|-------------|-------------|-------------|---|-------------|-------------|-------------|
| C  | 3.49431700  | 7.85677800  | -1.44009500 | H | 4.65572800  | 2.13363400  | -1.41185500 |
| C  | 2.75161500  | 6.80668500  | -0.69243400 | H | 6.21696500  | 0.97760000  | 2.31312300  |
| N  | 1.69203000  | 7.04014200  | 0.17435000  | H | 3.81048400  | 1.77808400  | 2.67598000  |
| C  | 2.89425400  | 5.44979100  | -0.70724800 | H | -2.81010900 | 3.35229100  | 4.58845700  |
| C  | 1.24127700  | 5.84608000  | 0.63638800  | H | -5.78098400 | 0.97332600  | 4.65156900  |
| N  | 1.94951400  | 4.86093000  | 0.11212400  | H | -5.33955400 | -0.91782300 | 2.97820000  |
| C  | 7.30564900  | 1.06456800  | -0.28737800 | H | -3.47263000 | -0.35424600 | 1.36831400  |
| C  | 5.96554900  | 1.44316300  | 0.24181900  | H | -1.66237500 | 5.37209800  | -3.28543100 |
| N  | 5.62555000  | 1.34854800  | 1.58348200  | H | -3.40556300 | 5.52807600  | -3.51521300 |
| C  | 4.83700400  | 1.92027000  | -0.37054000 | H | -1.01922700 | 3.46400800  | -1.45282100 |
| C  | 4.34515800  | 1.75359000  | 1.73984400  | H | -4.71901700 | 5.35057000  | -0.88942700 |
| N  | 3.83965700  | 2.10710800  | 0.56895400  | H | -4.44078700 | 3.64667000  | 0.98024600  |
| C  | -0.06515800 | 4.77150000  | 4.70438900  | H | -0.81134000 | 5.23829900  | 4.06084500  |
| N  | 0.93296800  | 4.10828000  | 3.89119400  | H | 0.90894800  | 3.93686700  | -4.59431100 |
| C  | 0.61353600  | 3.35355500  | 2.80052300  | H | 1.45688900  | 5.08319600  | -3.34505900 |
| O  | -0.60758200 | 3.42182300  | 2.41039900  | H | 8.11197400  | 1.59090800  | 0.23562200  |
| O  | 1.54780300  | 2.70221000  | 2.23917400  | H | -4.02545900 | 4.09535300  | 3.55325200  |
| C  | -3.84261500 | 3.26082200  | 4.24005100  | H | -4.50944000 | 3.37870600  | 5.09699200  |
| C  | -4.07416200 | 1.93662800  | 3.57980400  | H | 0.41809800  | 5.54599100  | 5.30530900  |
| N  | -3.32276200 | 1.46727300  | 2.50291000  | H | -0.58244500 | 4.08286400  | 5.38564400  |
| C  | -5.02105500 | 0.99564200  | 3.88699600  | H | 4.26957500  | 7.38733600  | -2.04832900 |
| C  | -3.81923900 | 0.27776500  | 2.17452300  | H | 2.64318500  | 4.07493000  | -4.17192100 |
| N  | -4.84687100 | -0.03667400 | 2.98628100  | H | -2.54186200 | 6.70177400  | -2.51150800 |
| C  | -2.59499400 | 5.64178000  | -2.78662200 | H | 1.86931000  | 3.99341000  | 4.24667200  |
| C  | -2.78261200 | 4.76222700  | -1.59790500 | C | 6.07738100  | -5.42642600 | 3.70658400  |
| N  | -3.89939600 | 4.77236800  | -0.77425800 | C | 5.90644600  | -4.27765700 | 2.70439000  |
| C  | -1.96076300 | 3.81066600  | -1.06064200 | C | 6.83726900  | -3.07769700 | 2.96941100  |
| C  | -3.71895700 | 3.85325900  | 0.20554500  | C | 6.73266700  | -2.04875600 | 1.83751400  |
| N  | -2.54655700 | 3.25568500  | 0.06023400  | C | 6.57086300  | -2.41198500 | 4.32796300  |
| C  | 1.62179900  | 4.09223000  | -3.78357900 | C | 6.65164500  | -0.78072600 | -3.97655900 |
| C  | 1.43723600  | 3.05126600  | -2.69147500 | C | 5.66848800  | -1.35241900 | -2.95880600 |
| O  | 2.38497300  | 2.90834600  | -1.84608500 | S | 6.24709200  | -2.99653600 | -2.33565600 |
| O  | 0.33648900  | 2.44094000  | -2.63639000 | C | 1.27989900  | -5.36377500 | -2.48351400 |
| Zn | 1.95799100  | 2.79132500  | 0.21369700  | C | 2.08767100  | -4.19965000 | -3.05866400 |
| Zn | -1.63654300 | 2.05951200  | 1.43693800  | O | 2.83516500  | -3.52040100 | -2.34107900 |
| H  | 2.83994000  | 8.42324900  | -2.11271400 | C | 0.39090900  | -4.90613600 | -1.31194800 |
| H  | 3.98420000  | 8.57489300  | -0.77241600 | C | -0.28433200 | -6.02838000 | -0.53653700 |
| H  | 3.57713600  | 4.85058400  | -1.28420900 | O | -1.50429100 | -6.07466000 | -0.35805600 |
| H  | 1.31531400  | 7.94338500  | 0.42202300  | N | 0.52851500  | -6.98795000 | -0.02251000 |
| H  | 0.41616500  | 5.73157000  | 1.32260600  | N | 1.97369700  | -4.00157200 | -4.38876900 |
| H  | 7.37031300  | 1.32547300  | -1.34556800 | C | 2.62751300  | -2.89758200 | -5.08243700 |
| H  | 7.48958100  | -0.01091900 | -0.19645500 | H | 6.10049800  | -4.65072200 | 1.69087100  |

|   |             |             |             |   |             |             |             |
|---|-------------|-------------|-------------|---|-------------|-------------|-------------|
| H | 4.86228800  | -3.93171000 | 2.70989200  | O | 0.00418800  | -1.96441900 | -2.53332100 |
| H | 7.86901500  | -3.45958400 | 2.97855600  | N | 1.50325200  | -1.15274200 | -0.95738800 |
| H | 6.93637500  | -2.49374600 | 0.85798100  | C | 1.39366400  | -0.51635800 | 0.35603600  |
| H | 7.45034900  | -1.23194100 | 1.99015600  | C | 0.03009600  | 0.25546000  | 0.20520600  |
| H | 5.72428200  | -1.61655000 | 1.79619200  | O | -0.75080100 | 0.35187000  | 1.30463000  |
| H | 7.24170100  | -1.55913900 | 4.48533500  | H | 2.19309900  | 0.21282900  | 0.49289700  |
| H | 5.53838000  | -2.04314100 | 4.38574500  | H | -1.60659800 | -0.45313200 | -1.02223300 |
| H | 6.72269900  | -3.10010800 | 5.16393200  | H | 2.17763400  | -1.87949100 | -1.18014500 |
| H | 5.79192100  | -5.13334300 | 4.72134500  | O | 0.32067700  | 1.64608400  | -0.23724500 |
| H | 5.54774700  | -0.67325000 | -2.11023000 | H | 0.26333900  | 1.74829300  | -1.25901700 |
| H | 4.68251900  | -1.50218300 | -3.40098700 | C | -1.45535700 | -2.34967200 | -5.39508800 |
| H | 5.01392400  | -3.48477600 | -2.08112000 | C | -2.79793800 | -2.36962700 | -4.68702400 |
| H | 7.65274300  | -0.66500700 | -3.54752800 | O | -3.84330200 | -2.61324100 | -5.28905500 |
| H | -0.39562700 | -4.25016900 | -1.68285700 | N | -2.73605400 | -2.08064500 | -3.35727900 |
| H | 1.00793800  | -4.32588600 | -0.61606600 | C | -3.87114800 | -2.29738700 | -2.47991300 |
| H | 1.53258200  | -6.91727600 | -0.05226400 | C | -4.26443000 | -0.97643500 | -1.80238200 |
| H | 0.11022600  | -7.70859900 | 0.54688000  | O | -3.49343400 | -0.44468000 | -0.97413800 |
| H | 0.66843700  | -5.84741900 | -3.25229300 | C | -3.54739600 | -3.34504600 | -1.39646600 |
| H | 3.71442400  | -2.99202200 | -5.01256800 | O | -3.14384700 | -4.52807700 | -2.04313100 |
| H | 2.32123600  | -1.94110200 | -4.64842000 | N | -5.45248500 | -0.40214300 | -2.07974800 |
| H | 1.27364300  | -4.52822200 | -4.88791100 | C | -6.47082200 | -0.80875900 | -3.08557200 |
| H | 2.01540100  | -6.10579200 | -2.15038500 | C | -6.06869300 | -0.39052300 | -4.50401500 |
| H | 2.33778100  | -2.92590000 | -6.13344000 | C | -7.72602300 | -0.08575500 | -2.56142300 |
| H | 6.73994700  | -1.43257300 | -4.84996000 | C | -7.17732700 | 1.23917900  | -2.00767300 |
| H | 6.31609300  | 0.20562200  | -4.31659100 | C | -5.83203500 | 0.84026100  | -1.38143400 |
| H | 7.11780300  | -5.76885800 | 3.73848800  | H | -5.05011100 | 1.59594400  | -1.49934900 |
| H | 5.45707000  | -6.28536700 | 3.43067100  | H | -5.92084000 | 0.63591000  | -0.30727100 |
| C | -4.36808100 | -5.09756600 | 6.54288700  | H | -7.02264100 | 1.95434300  | -2.82168200 |
| C | -2.85166400 | -4.92059100 | 6.35964000  | H | -7.84752300 | 1.70757100  | -1.28175100 |
| C | -2.50559900 | -4.17579100 | 5.08904400  | H | -8.47689200 | 0.05090500  | -3.34330800 |
| C | -2.15191500 | -2.82307100 | 5.10284500  | H | -8.18299800 | -0.67055800 | -1.75500500 |
| C | -2.57711200 | -4.81709900 | 3.84226800  | H | -6.60835500 | -1.89214300 | -3.04888200 |
| C | -1.89289600 | -2.12198400 | 3.92213800  | H | -5.85699700 | 0.68269700  | -4.55469000 |
| C | -2.32347400 | -4.13975400 | 2.65527100  | H | -5.19701200 | -0.94989500 | -4.84833300 |
| C | -1.98846900 | -2.77851100 | 2.68885400  | H | -6.89010800 | -0.60758000 | -5.19555200 |
| O | -1.77932200 | -2.15518000 | 1.49602600  | H | -4.67070800 | -2.68060200 | -3.11439700 |
| H | -2.37502800 | -5.90894200 | 6.35176300  | H | -2.65645000 | -5.08359400 | -1.40376600 |
| H | -2.43988600 | -4.38687300 | 7.22426500  | H | -4.45722400 | -3.49332900 | -0.78581500 |
| H | -2.07444700 | -2.30199800 | 6.05470300  | H | -2.77517600 | -2.94765400 | -0.72581100 |
| H | -2.83416300 | -5.87327400 | 3.80084500  | H | -1.80270000 | -2.02286700 | -2.94505900 |
| H | -1.60805600 | -1.07365700 | 3.95367300  | H | -0.63418900 | -2.03378300 | -4.75257900 |
| H | -2.36007500 | -4.65131800 | 1.69837400  | H | -1.26085900 | -3.35801600 | -5.77618400 |
| H | -1.41018400 | -1.24246600 | 1.59610400  | H | -1.52925100 | -1.69145900 | -6.26533400 |
| H | -4.87123900 | -4.12606300 | 6.59416800  | C | 1.43631200  | -1.51631300 | 1.51024300  |
| H | -4.80280100 | -5.65139800 | 5.70458600  | H | 2.41374400  | -2.01060400 | 1.53477000  |
| H | -4.59587500 | -5.64578500 | 7.46315700  | H | 1.28528000  | -1.00262800 | 2.46323400  |
| N | -0.59108100 | -0.42505800 | -0.89829000 | H | 0.66236500  | -2.27862700 | 1.40109100  |
| C | 0.27571900  | -1.25081100 | -1.55945400 |   |             |             |             |

(5R)-MeHYD-TS2-II (SkDHPase)

|    |             |             |             |   |             |             |             |
|----|-------------|-------------|-------------|---|-------------|-------------|-------------|
| C  | 3.27200100  | 7.87075300  | -1.52203600 | H | -1.03037700 | 3.50415900  | -1.35899700 |
| C  | 2.56562900  | 6.74891600  | -0.83266200 | H | -4.84521600 | 5.16215800  | -0.79788000 |
| N  | 1.45726300  | 6.91949400  | -0.01331800 | H | -4.41629300 | 3.52007500  | 1.10260200  |
| C  | 2.78482700  | 5.39725300  | -0.83481500 | H | -0.73150200 | 5.30938200  | 3.99638100  |
| C  | 1.05563000  | 5.70603200  | 0.43763900  | H | 0.76383700  | 3.90516100  | -4.67762000 |
| N  | 1.84109600  | 4.75933300  | -0.04925800 | H | 1.07409900  | 4.95957400  | -3.28188600 |
| C  | 7.21771200  | 1.14601100  | -0.42725900 | H | 8.04165500  | 1.68522900  | 0.05383600  |
| C  | 5.90157000  | 1.53395300  | 0.13621700  | H | -3.93388700 | 4.00983500  | 3.61037800  |
| N  | 5.61624600  | 1.48303000  | 1.49036700  | H | -4.67970800 | 3.27852400  | 5.04168200  |
| C  | 4.74778200  | 1.97655900  | -0.45088800 | H | 0.28805100  | 5.43355700  | 5.44286200  |
| C  | 4.33954000  | 1.87760400  | 1.68153600  | H | -0.76632300 | 4.02715900  | 5.21477900  |
| N  | 3.78383500  | 2.18383900  | 0.51816900  | H | 4.11024700  | 7.47598600  | -2.09911200 |
| C  | -0.11586300 | 4.74338300  | 4.69772800  | H | 2.44121000  | 4.25000100  | -4.14967700 |
| N  | 0.97199100  | 4.10319500  | 4.00898600  | H | -2.85109100 | 6.61831700  | -2.49748600 |
| C  | 0.74240200  | 3.35579300  | 2.90162700  | H | 1.88325700  | 4.03232400  | 4.43255800  |
| O  | -0.45002700 | 3.38634400  | 2.43852100  | C | 6.17547200  | -5.35363500 | 3.60529300  |
| O  | 1.73607400  | 2.74235300  | 2.39562200  | C | 5.96602500  | -4.21057900 | 2.60383700  |
| C  | -3.87587400 | 3.16883200  | 4.31039500  | C | 6.85539800  | -2.98003800 | 2.87378400  |
| C  | -3.99231300 | 1.84750400  | 3.60810700  | C | 6.70693900  | -1.94333800 | 1.75378200  |
| N  | -3.15735600 | 1.42140500  | 2.57218000  | C | 6.57571300  | -2.33682800 | 4.24058700  |
| C  | -4.90890300 | 0.86000500  | 3.85933900  | C | 6.52327200  | -0.71989400 | -4.09863900 |
| C  | -3.57992700 | 0.21189400  | 2.21809400  | C | 5.58298800  | -1.30050700 | -3.04601300 |
| N  | -4.63609500 | -0.15824000 | 2.96842900  | S | 6.24509900  | -2.89479400 | -2.37997500 |
| C  | -2.80444400 | 5.55113500  | -2.74483800 | C | 1.36269200  | -5.34481300 | -2.40053400 |
| C  | -2.88813600 | 4.68888300  | -1.53264700 | C | 2.09393600  | -4.16836200 | -3.04688300 |
| N  | -3.98612900 | 4.64375000  | -0.68544500 | O | 2.83092800  | -3.42388500 | -2.38354100 |
| C  | -1.99441700 | 3.80632400  | -0.98957300 | C | 0.32309000  | -4.88524900 | -1.35808800 |
| C  | -3.72448400 | 3.76053000  | 0.31058300  | C | -0.28185600 | -5.98911800 | -0.50177900 |
| N  | -2.52029800 | 3.24110300  | 0.15326900  | O | -1.49554100 | -6.07752200 | -0.30009300 |
| C  | 1.41751500  | 4.06923400  | -3.81973500 | N | 0.57946400  | -6.87609200 | 0.06352800  |
| C  | 1.38039400  | 2.90167100  | -2.86622000 | N | 1.93317100  | -4.02041800 | -4.37897100 |
| O  | 2.30335600  | 2.64081000  | -2.09866700 | C | 2.51435400  | -2.90638100 | -5.12115100 |
| O  | 0.23366800  | 2.24347800  | -2.90613500 | H | 6.17548200  | -4.57476700 | 1.59010900  |
| Zn | 1.84866100  | 2.74381300  | 0.36763500  | H | 4.91078900  | -3.90096700 | 2.60807000  |
| Zn | -1.45409300 | 2.01235900  | 1.41050000  | H | 7.90004600  | -3.32541200 | 2.87186400  |
| H  | 2.61151700  | 8.40619500  | -2.21325300 | H | 6.90991000  | -2.37258500 | 0.76706300  |
| H  | 3.67246200  | 8.60012800  | -0.80926400 | H | 7.40406000  | -1.10869800 | 1.90621800  |
| H  | 3.54155200  | 4.83714400  | -1.35910300 | H | 5.68710000  | -1.53735300 | 1.73133300  |
| H  | 1.02497500  | 7.80177600  | 0.21964000  | H | 7.21525000  | -1.46057100 | 4.40001200  |
| H  | 0.21528200  | 5.54168300  | 1.09619100  | H | 5.53084500  | -2.00751100 | 4.31007200  |
| H  | 7.24814600  | 1.37961300  | -1.49344400 | H | 6.76092700  | -3.02597600 | 5.06889900  |
| H  | 7.40779300  | 0.07326300  | -0.31630200 | H | 5.87287100  | -5.07310400 | 4.61855400  |
| H  | 4.53379500  | 2.14388800  | -1.49367100 | H | 5.44576100  | -0.59931900 | -2.21779300 |
| H  | 6.23896100  | 1.14349200  | 2.20909500  | H | 4.59810800  | -1.51212600 | -3.46438700 |
| H  | 3.84015400  | 1.93116900  | 2.63470800  | H | 5.03955300  | -3.41945800 | -2.07309000 |
| H  | -2.92035900 | 3.25612800  | 4.83665200  | H | 7.52444100  | -0.54381000 | -3.69087200 |
| H  | -5.70701500 | 0.79755800  | 4.58186700  | H | -0.50498800 | -4.37654300 | -1.85059900 |
| H  | -5.07909700 | -1.06456800 | 2.93376500  | H | 0.78351900  | -4.15753200 | -0.68004800 |
| H  | -3.15948600 | -0.39189800 | 1.42720900  | H | 1.57683700  | -6.73819000 | 0.04844500  |
| H  | -1.85962800 | 5.36441900  | -3.25877900 | H | 0.19785400  | -7.54621600 | 0.71490300  |
| H  | -3.61182800 | 5.34054000  | -3.45523500 | H | 0.88225200  | -5.97748000 | -3.15444300 |

|   |             |             |             |   |             |             |             |
|---|-------------|-------------|-------------|---|-------------|-------------|-------------|
| H | 3.60618900  | -2.95319000 | -5.09003000 | C | -6.20963300 | -0.54274800 | -4.38006900 |
| H | 2.18356700  | -1.95425900 | -4.69601800 | C | -7.77878600 | -0.11692300 | -2.38573500 |
| H | 1.25314200  | -4.60148800 | -4.84450600 | C | -7.20293200 | 1.23111600  | -1.92290600 |
| H | 2.14674700  | -5.95121300 | -1.93278100 | C | -5.83506400 | 0.85621800  | -1.33147800 |
| H | 2.18733500  | -2.97090000 | -6.15955800 | H | -5.05684200 | 1.60268900  | -1.51530100 |
| H | 6.62836200  | -1.39672100 | -4.95094600 | H | -5.88089500 | 0.70311200  | -0.24597100 |
| H | 6.13816500  | 0.23808400  | -4.46652100 | H | -7.07827700 | 1.90233800  | -2.77865400 |
| H | 7.22809500  | -5.65599700 | 3.64289000  | H | -7.84221100 | 1.74006700  | -1.19624000 |
| H | 5.59022400  | -6.23534800 | 3.32466800  | H | -8.56073100 | -0.01560600 | -3.14223600 |
| C | -4.21714300 | -5.19086100 | 6.64296900  | H | -8.20493000 | -0.65652500 | -1.53229100 |
| C | -2.77951800 | -4.60932900 | 6.52720400  | H | -6.68939500 | -1.95327600 | -2.81670600 |
| C | -2.43227000 | -3.98775800 | 5.18615200  | H | -6.00348600 | 0.52595300  | -4.50324100 |
| C | -1.97856200 | -2.66835100 | 5.08675700  | H | -5.35218300 | -1.12040100 | -4.73023700 |
| C | -2.51504400 | -4.72888600 | 3.99478000  | H | -7.06033700 | -0.79950600 | -5.02098200 |
| C | -1.62132200 | -2.09931900 | 3.86018200  | H | -4.74522800 | -2.72568700 | -2.97956600 |
| C | -2.16930700 | -4.18241500 | 2.76300200  | H | -2.69583700 | -5.09409400 | -1.28661900 |
| C | -1.71884600 | -2.85452100 | 2.68339900  | H | -4.44951300 | -3.45643300 | -0.62788300 |
| O | -1.39774800 | -2.36846000 | 1.45489100  | H | -2.75615000 | -2.93936500 | -0.66347000 |
| H | -2.05657100 | -5.40682800 | 6.74166900  | H | -1.87652600 | -2.04145700 | -2.91632800 |
| H | -2.62173600 | -3.85787500 | 7.30826100  | H | -0.78155300 | -1.96926800 | -4.77604500 |
| H | -1.89161900 | -2.06665200 | 5.98914500  | H | -1.30748500 | -3.46106600 | -5.59362500 |
| H | -2.85302400 | -5.76220800 | 4.03112200  | H | -1.71702000 | -1.90554000 | -6.30680100 |
| H | -1.25722100 | -1.07680500 | 3.81237100  | C | 1.83230200  | -0.88679900 | 1.55257100  |
| H | -2.22363000 | -4.77258700 | 1.85305000  | H | 2.82303900  | -1.35549500 | 1.53643600  |
| H | -1.14248900 | -1.40540100 | 1.46598500  | H | 1.84332600  | -0.07240300 | 2.28156000  |
| H | -4.78116500 | -5.04344500 | 5.71744400  | H | 1.10230700  | -1.63160300 | 1.87217900  |
| H | -4.20754200 | -6.26416000 | 6.85209600  | N | -0.47229700 | -0.13322600 | -1.17748800 |
| H | -4.77999300 | -4.70940600 | 7.44823600  | C | 0.22865500  | -1.25225900 | -1.59947700 |
| C | -1.58237400 | -2.42730500 | -5.35582000 | O | -0.08965800 | -1.98705000 | -2.54502000 |
| C | -2.91057800 | -2.44972800 | -4.62186900 | N | 1.33301500  | -1.40148700 | -0.82799200 |
| O | -3.96442700 | -2.72303100 | -5.19613400 | C | 1.47967500  | -0.35372400 | 0.16985100  |
| N | -2.81827300 | -2.13397400 | -3.30244000 | C | 0.09528200  | 0.41068800  | 0.08209500  |
| C | -3.92434300 | -2.32492200 | -2.38473100 | O | -0.74628300 | 0.21364900  | 1.15152700  |
| C | -4.28263000 | -0.97761600 | -1.74162900 | H | 2.25529200  | 0.34408600  | -0.16277400 |
| O | -3.46880300 | -0.41058000 | -0.98467500 | H | -1.49460600 | -0.20901300 | -1.20520200 |
| C | -3.56668800 | -3.34217200 | -1.28407700 | H | 2.06516600  | -2.03417000 | -1.13974500 |
| O | -3.21525300 | -4.55163800 | -1.91254900 | O | 0.25690800  | 1.79941900  | -0.09295700 |
| N | -5.48703000 | -0.41735700 | -1.98651600 | H | 0.16470300  | 1.58629900  | -2.16114700 |
| C | -6.54914500 | -0.87451700 | -2.92224900 |   |             |             |             |

**(5R)-MeHYD-INT2-II (SkDHPase)**

|   |            |            |             |   |             |            |             |
|---|------------|------------|-------------|---|-------------|------------|-------------|
| C | 3.26741300 | 7.87011300 | -1.47698600 | C | 4.74799000  | 1.97062600 | -0.44844800 |
| C | 2.56494200 | 6.74528800 | -0.79134700 | C | 4.35343500  | 1.87571200 | 1.68734100  |
| N | 1.46155100 | 6.91174100 | 0.03513400  | N | 3.79046600  | 2.17940300 | 0.52669100  |
| C | 2.78518400 | 5.39404400 | -0.80185000 | C | -0.09886400 | 4.70474200 | 4.73526900  |
| C | 1.06366300 | 5.69598700 | 0.48286500  | N | 0.99734600  | 4.08509900 | 4.04286100  |
| N | 1.84762300 | 4.75325400 | -0.01299400 | C | 0.76254400  | 3.31726500 | 2.95037500  |
| C | 7.22035100 | 1.14141400 | -0.43383800 | O | -0.44121900 | 3.31454800 | 2.52099700  |
| C | 5.90585000 | 1.53001200 | 0.13280300  | O | 1.76049100  | 2.72140100 | 2.43048900  |
| N | 5.62879800 | 1.48154900 | 1.48869500  | C | -3.85921100 | 3.13029400 | 4.35077400  |

|    |             |             |             |   |             |             |             |
|----|-------------|-------------|-------------|---|-------------|-------------|-------------|
| C  | -3.98486800 | 1.81892000  | 3.63035300  | C | 6.71614900  | -1.96048800 | 1.73009100  |
| N  | -3.14429300 | 1.39317900  | 2.59902000  | C | 6.59923400  | -2.36957700 | 4.21506800  |
| C  | -4.91670400 | 0.84034900  | 3.86055000  | C | 6.51525700  | -0.70355400 | -4.11375800 |
| C  | -3.57806000 | 0.19352600  | 2.22655600  | C | 5.56879100  | -1.28210800 | -3.06554700 |
| N  | -4.64659600 | -0.17196900 | 2.96202900  | S | 6.21238600  | -2.89028800 | -2.41512700 |
| C  | -2.81160200 | 5.55412300  | -2.69388500 | C | 1.32227500  | -5.31243500 | -2.41839800 |
| C  | -2.88477100 | 4.69797000  | -1.47713700 | C | 2.06352200  | -4.14226400 | -3.06309700 |
| N  | -3.95055600 | 4.70770500  | -0.58872200 | O | 2.79308100  | -3.39511700 | -2.39395300 |
| C  | -2.00969000 | 3.78035200  | -0.96098500 | C | 0.27195600  | -4.84259900 | -1.39076800 |
| C  | -3.68978000 | 3.82132200  | 0.40460100  | C | -0.31861300 | -5.93938000 | -0.51516300 |
| N  | -2.51623200 | 3.24890600  | 0.20713200  | O | -1.53288100 | -6.06151000 | -0.33660500 |
| C  | 1.40773900  | 4.08092700  | -3.79080000 | N | 0.55825900  | -6.78190900 | 0.09277500  |
| C  | 1.35525800  | 2.86703300  | -2.88677300 | N | 1.91769800  | -3.99939500 | -4.39684800 |
| O  | 2.25852900  | 2.58942100  | -2.10105100 | C | 2.50432300  | -2.88638500 | -5.13617900 |
| O  | 0.22570400  | 2.18985700  | -3.00381600 | H | 6.18646600  | -4.59198400 | 1.55346100  |
| Zn | 1.85938300  | 2.74676300  | 0.39928100  | H | 4.92611000  | -3.92372300 | 2.58047800  |
| Zn | -1.44564900 | 1.98704300  | 1.43581100  | H | 7.91635500  | -3.34894300 | 2.83278500  |
| H  | 2.60427700  | 8.40918300  | -2.16288100 | H | 6.91290700  | -2.38384000 | 0.73955300  |
| H  | 3.67053900  | 8.59595000  | -0.76205600 | H | 7.41408600  | -1.12678700 | 1.88345900  |
| H  | 3.53979900  | 4.83665500  | -1.33235300 | H | 5.69628100  | -1.55415400 | 1.71662900  |
| H  | 1.03045900  | 7.79289000  | 0.27444800  | H | 7.23936600  | -1.49414100 | 4.37647000  |
| H  | 0.22749900  | 5.52779100  | 1.14562400  | H | 5.55469700  | -2.04094000 | 4.29233000  |
| H  | 7.24909300  | 1.37490800  | -1.50010200 | H | 6.78918400  | -3.06386800 | 5.03799100  |
| H  | 7.41003400  | 0.06858000  | -0.32325900 | H | 5.89582200  | -5.10740900 | 4.58019100  |
| H  | 4.52515900  | 2.13408100  | -1.49025400 | H | 5.44091300  | -0.58712400 | -2.23068400 |
| H  | 6.25674800  | 1.14491800  | 2.20421800  | H | 4.58097700  | -1.47698100 | -3.48523800 |
| H  | 3.85957900  | 1.93159300  | 2.64327000  | H | 5.00155500  | -3.40040700 | -2.10439500 |
| H  | -2.92283000 | 3.18593300  | 4.91464300  | H | 7.51892800  | -0.54391500 | -3.70540500 |
| H  | -5.72371700 | 0.78026300  | 4.57335500  | H | -0.56229600 | -4.35711000 | -1.89685200 |
| H  | -5.10336600 | -1.07061000 | 2.91049800  | H | 0.71948200  | -4.09627500 | -0.72468400 |
| H  | -3.15646900 | -0.40286000 | 1.43046100  | H | 1.54990800  | -6.60638900 | 0.10054100  |
| H  | -1.90029200 | 5.32155200  | -3.24815200 | H | 0.18405700  | -7.44166800 | 0.75891700  |
| H  | -3.65832300 | 5.38338700  | -3.36829800 | H | 0.84810200  | -5.94915000 | -3.17282400 |
| H  | -1.07199400 | 3.43194700  | -1.35960200 | H | 3.59597100  | -2.93341700 | -5.09870200 |
| H  | -4.78979100 | 5.26247000  | -0.67408900 | H | 2.17032800  | -1.93478300 | -4.71281900 |
| H  | -4.36190400 | 3.61800400  | 1.22359700  | H | 1.25097200  | -4.58950300 | -4.87012500 |
| H  | -0.71234300 | 5.28648200  | 4.04415600  | H | 2.09782800  | -5.91844600 | -1.93671500 |
| H  | 0.79307200  | 3.94042900  | -4.68106100 | H | 2.18322400  | -2.95112400 | -6.17639800 |
| H  | 1.02580800  | 4.94247000  | -3.23279400 | H | 6.61097600  | -1.37364400 | -4.97246300 |
| H  | 8.04540900  | 1.68032400  | 0.04564500  | H | 6.14180400  | 0.26250400  | -4.47232100 |
| H  | -3.86575300 | 3.97907500  | 3.65812900  | H | 7.24735400  | -5.68464200 | 3.59613100  |
| H  | -4.68737000 | 3.25530600  | 5.05185400  | H | 5.60842800  | -6.26230900 | 3.28069900  |
| H  | 0.29566500  | 5.37803000  | 5.50070100  | C | -4.18837200 | -5.24299100 | 6.63584900  |
| H  | -0.75077000 | 3.97339200  | 5.22787000  | C | -2.73122800 | -4.77250200 | 6.46877400  |
| H  | 4.10357400  | 7.47910200  | -2.05964100 | C | -2.41145300 | -4.11769300 | 5.13608000  |
| H  | 2.44089200  | 4.29080800  | -4.06983500 | C | -1.99047100 | -2.78569000 | 5.05381100  |
| H  | -2.79545900 | 6.62238500  | -2.44714600 | C | -2.48390600 | -4.84025900 | 3.93296800  |
| H  | 1.91620000  | 4.04267000  | 4.45323800  | C | -1.64780500 | -2.19025600 | 3.83483200  |
| C  | 6.19459600  | -5.38212900 | 3.56420800  | C | -2.15399200 | -4.26749800 | 2.70879200  |
| C  | 5.98132500  | -4.23341200 | 2.57008400  | C | -1.72670200 | -2.93063200 | 2.64718400  |
| C  | 6.87157300  | -3.00413600 | 2.84276100  | O | -1.40455800 | -2.42994300 | 1.42400100  |

|   |             |             |             |   |             |             |             |
|---|-------------|-------------|-------------|---|-------------|-------------|-------------|
| H | -2.06926800 | -5.63749800 | 6.61142000  | H | -8.19736000 | -0.53855200 | -1.49310000 |
| H | -2.48615900 | -4.07236800 | 7.27622400  | H | -6.71364300 | -1.89367800 | -2.75148600 |
| H | -1.91091100 | -2.19623300 | 5.96496300  | H | -5.99655400 | 0.52975800  | -4.50480800 |
| H | -2.79669500 | -5.88195200 | 3.95369400  | H | -5.37330100 | -1.13044600 | -4.69837000 |
| H | -1.30266400 | -1.16046200 | 3.80380600  | H | -7.07845100 | -0.79029000 | -4.98169300 |
| H | -2.20145300 | -4.84492900 | 1.79049500  | H | -4.76210800 | -2.67231200 | -2.97887500 |
| H | -1.15949900 | -1.46534500 | 1.42955900  | H | -2.73279000 | -5.06947000 | -1.31057600 |
| H | -4.88556000 | -4.40188600 | 6.55874800  | H | -4.46273400 | -3.41581600 | -0.63403400 |
| H | -4.46342100 | -5.97178000 | 5.86664200  | H | -2.76475500 | -2.91369100 | -0.67429200 |
| H | -4.33421700 | -5.71658400 | 7.61194100  | H | -1.89175400 | -1.98724200 | -2.93140500 |
| C | -1.59340200 | -2.40832100 | -5.35502000 | H | -0.83536800 | -1.82186200 | -4.83685500 |
| C | -2.92428100 | -2.42608500 | -4.62759100 | H | -1.23521600 | -3.44051800 | -5.44172700 |
| O | -3.97643900 | -2.71122400 | -5.19823100 | H | -1.75306800 | -2.03194200 | -6.36789000 |
| N | -2.83273000 | -2.09664100 | -3.31119200 | C | 1.81831200  | -0.86028200 | 1.51995700  |
| C | -3.93444200 | -2.28061000 | -2.38776100 | H | 2.80772300  | -1.33170900 | 1.50336500  |
| C | -4.26970200 | -0.92805900 | -1.74431300 | H | 1.83298200  | -0.04739100 | 2.25054100  |
| O | -3.43396900 | -0.36269700 | -1.01118500 | H | 1.08563000  | -1.60313700 | 1.83792600  |
| C | -3.58179600 | -3.30550800 | -1.29339500 | N | -0.42909200 | -0.01618200 | -1.27098100 |
| O | -3.24478300 | -4.51440800 | -1.93152000 | C | 0.24113700  | -1.17679000 | -1.66645700 |
| N | -5.47471600 | -0.36138300 | -1.96965100 | O | -0.07959300 | -1.89637000 | -2.62022200 |
| C | -6.55297500 | -0.82067700 | -2.88565800 | N | 1.30898200  | -1.36831200 | -0.85885700 |
| C | -6.21857800 | -0.53213100 | -4.35361900 | C | 1.46686100  | -0.32262900 | 0.13947700  |
| C | -7.76381000 | -0.02610000 | -2.35951900 | C | 0.09013200  | 0.44949200  | 0.05536300  |
| C | -7.15792800 | 1.31880200  | -1.92699300 | O | -0.79069700 | 0.17164300  | 1.07215300  |
| C | -5.79798000 | 0.92625800  | -1.32985100 | H | 2.24585100  | 0.36980600  | -0.19719900 |
| H | -5.00482700 | 1.65439600  | -1.52239000 | H | -1.45277100 | -0.09331200 | -1.30363400 |
| H | -5.84831900 | 0.78795200  | -0.24243500 | H | 2.02642800  | -2.02883900 | -1.14869200 |
| H | -7.01949100 | 1.96837100  | -2.79729700 | O | 0.24373600  | 1.83935000  | -0.01348500 |
| H | -7.78455500 | 1.85747400  | -1.21079600 | H | 0.13424400  | 1.44598900  | -2.33423500 |
| H | -8.54706600 | 0.07572100  | -3.11459600 |   |             |             |             |

**(5R)-MeHYD-TS3-II (SkDHPase)**

|   |             |            |             |    |             |             |             |
|---|-------------|------------|-------------|----|-------------|-------------|-------------|
| C | 3.46632300  | 7.76563200 | -1.69067500 | N  | -3.23069800 | 1.52328500  | 2.52627300  |
| C | 2.82578900  | 6.70239800 | -0.87215500 | C  | -4.90745200 | 1.05207300  | 3.93880200  |
| N | 2.08430100  | 6.94689300 | 0.27375600  | C  | -3.70350500 | 0.31599200  | 2.23860500  |
| C | 2.79200500  | 5.34457700 | -1.02355000 | N  | -4.71982300 | -0.00089900 | 3.06557900  |
| C | 1.64043000  | 5.76461900 | 0.76476800  | C  | -2.65158400 | 5.53763000  | -2.87653300 |
| N | 2.04852700  | 4.77208000 | -0.00914500 | C  | -2.74329600 | 4.73705300  | -1.61937200 |
| C | 7.27341100  | 0.99314800 | -0.41440700 | N  | -3.76963200 | 4.87642200  | -0.69527800 |
| C | 5.93475900  | 1.38576300 | 0.10647500  | C  | -1.92765700 | 3.77165500  | -1.08894400 |
| N | 5.61669200  | 1.34675900 | 1.45528500  | C  | -3.54683800 | 4.01761000  | 0.32967900  |
| C | 4.79308100  | 1.83107200 | -0.50726500 | N  | -2.43312100 | 3.33715100  | 0.12206100  |
| C | 4.33784700  | 1.75237100 | 1.61576800  | C  | 1.54311400  | 3.94547000  | -3.89922400 |
| N | 3.80905300  | 2.05231100 | 0.43951300  | C  | 1.32631800  | 2.78675000  | -2.93054100 |
| C | -0.00217600 | 4.86310600 | 4.59329800  | O  | 2.15881400  | 2.58794000  | -2.01042400 |
| N | 1.04433100  | 4.33482200 | 3.75146200  | O  | 0.24905900  | 2.12408800  | -3.14124700 |
| C | 0.75561800  | 3.30530500 | 2.88634500  | Zn | 1.90428400  | 2.73812300  | 0.19679900  |
| O | -0.48577200 | 3.05365400 | 2.74992100  | Zn | -1.49337300 | 2.01873900  | 1.41547700  |
| O | 1.73698900  | 2.75985600 | 2.29646300  | H  | 2.73143800  | 8.47042200  | -2.09648000 |
| C | -3.79174600 | 3.35456300 | 4.23218700  | H  | 4.19749000  | 8.34417000  | -1.11449500 |
| C | -3.98439700 | 2.00626400 | 3.59767000  | H  | 3.24054000  | 4.73260100  | -1.78705400 |



|   |             |             |             |   |             |             |             |
|---|-------------|-------------|-------------|---|-------------|-------------|-------------|
| H | 1.91022800  | 7.85248300  | 0.68474900  | H | 7.56354000  | -1.57899600 | 4.29712000  |
| H | 1.07521400  | 5.66476800  | 1.67920100  | H | 5.83507800  | -1.96674800 | 4.38315100  |
| H | 7.33597800  | 1.21591100  | -1.48151400 | H | 7.03236000  | -3.06983600 | 5.07218300  |
| H | 7.46243500  | -0.07739300 | -0.28520200 | H | 5.90814800  | -5.03502200 | 4.79741600  |
| H | 4.59889700  | 1.99977800  | -1.55456700 | H | 5.49882000  | -0.80862700 | -2.14778500 |
| H | 6.22394300  | 1.01679300  | 2.19149100  | H | 4.56176300  | -1.57327000 | -3.43019400 |
| H | 3.82075300  | 1.82517100  | 2.55875000  | H | 4.83334800  | -3.55975900 | -2.06411300 |
| H | -2.74333800 | 3.50924100  | 4.50028200  | H | 7.56682500  | -0.88929300 | -3.63113700 |
| H | -5.66066700 | 1.03434000  | 4.71030100  | H | -0.70554000 | -4.42743500 | -1.80557000 |
| H | -5.18568000 | -0.89586700 | 3.09386600  | H | 0.56856200  | -4.17247800 | -0.61995900 |
| H | -3.33975700 | -0.32317400 | 1.44649000  | H | 1.34283900  | -6.69265300 | 0.24076200  |
| H | -1.80492600 | 5.18552200  | -3.46889500 | H | -0.04689200 | -7.48846500 | 0.89794000  |
| H | -3.55164600 | 5.43606100  | -3.49306900 | H | 0.69218500  | -6.05073100 | -3.04800900 |
| H | -1.03787100 | 3.33129400  | -1.50741200 | H | 3.59246100  | -3.13895900 | -4.93570100 |
| H | -4.55941000 | 5.50015300  | -0.77616900 | H | 2.16183200  | -2.11377500 | -4.64472700 |
| H | -4.20365600 | 3.90586900  | 1.17786500  | H | 1.26200300  | -4.79646600 | -4.76917600 |
| H | -0.82792800 | 5.23015100  | 3.98149200  | H | 1.92407800  | -6.03977900 | -1.79364900 |
| H | 0.94657500  | 3.81438700  | -4.80252600 | H | 2.22596800  | -3.17638400 | -6.07219600 |
| H | 1.24384500  | 4.87665500  | -3.40681600 | H | 6.58984300  | -1.59573400 | -4.92201900 |
| H | 8.07889600  | 1.54129100  | 0.08703300  | H | 6.26108000  | 0.05546200  | -4.36463000 |
| H | -4.07870000 | 4.17102100  | 3.55853800  | H | 7.10544000  | -5.78961800 | 3.73683400  |
| H | -4.40259700 | 3.43761000  | 5.13377300  | H | 5.39592100  | -6.20718400 | 3.58543300  |
| H | 0.39581500  | 5.69887400  | 5.17542000  | C | -4.30720200 | -4.93563700 | 6.77161200  |
| H | -0.40534800 | 4.11843100  | 5.29120600  | C | -2.86404000 | -4.38085200 | 6.60572100  |
| H | 3.99270300  | 7.31358300  | -2.53346900 | C | -2.52586600 | -3.83913700 | 5.22813000  |
| H | 2.60088400  | 4.03098400  | -4.15918700 | C | -2.05766000 | -2.53285300 | 5.05118100  |
| H | -2.50480100 | 6.60486600  | -2.67344400 | C | -2.63158600 | -4.64314200 | 4.08023100  |
| H | 2.00084300  | 4.37481800  | 4.07115000  | C | -1.70387000 | -2.03783200 | 3.79208200  |
| C | 6.08920000  | -5.38142900 | 3.77552600  | C | -2.28993900 | -4.17058200 | 2.81677200  |
| C | 5.90568100  | -4.25986300 | 2.74511400  | C | -1.81995600 | -2.85672300 | 2.66072200  |
| C | 6.92527600  | -3.11153000 | 2.87818500  | O | -1.49160500 | -2.44406300 | 1.40571900  |
| C | 6.76338300  | -2.10695300 | 1.73087500  | H | -2.14832000 | -5.17463200 | 6.85519000  |
| C | 6.83484900  | -2.39572500 | 4.23443400  | H | -2.68637000 | -3.58936800 | 7.34161500  |
| C | 6.55287200  | -0.94990400 | -4.04046000 | H | -1.95447500 | -1.88278800 | 5.91753600  |
| C | 5.56351200  | -1.48165400 | -3.00732500 | H | -2.98588500 | -5.66712800 | 4.17651900  |
| S | 6.07353800  | -3.16010900 | -2.41930100 | H | -1.32787600 | -1.02444800 | 3.68448900  |
| C | 1.16994500  | -5.41955600 | -2.29136100 | H | -2.36789600 | -4.80714500 | 1.94038900  |
| C | 1.94619500  | -4.26899900 | -2.93062700 | H | -1.26183700 | -1.47704000 | 1.36512100  |
| O | 2.63871000  | -3.50236100 | -2.24339100 | H | -4.88087200 | -4.83367100 | 5.84590100  |
| C | 0.11579200  | -4.91822300 | -1.28296600 | H | -4.30860700 | -5.99520800 | 7.04184200  |
| C | -0.50604100 | -5.99100700 | -0.39773200 | H | -4.85378900 | -4.40148900 | 7.55451600  |
| O | -1.72390800 | -6.08288000 | -0.22816500 | C | -1.58147500 | -2.52644900 | -5.28310800 |
| N | 0.34727200  | -6.84384400 | 0.22844900  | C | -2.93474400 | -2.51320400 | -4.59623400 |
| N | 1.87024600  | -4.16333800 | -4.27315100 | O | -3.97697800 | -2.80614400 | -5.17795500 |
| C | 2.50412600  | -3.08101500 | -5.02214100 | N | -2.86898500 | -2.13123000 | -3.29040600 |
| H | 5.98751000  | -4.68134600 | 1.73510700  | C | -3.98207000 | -2.26996600 | -2.37383500 |
| H | 4.88902700  | -3.84739000 | 2.82438200  | C | -4.26437100 | -0.89478500 | -1.75421800 |
| H | 7.92995200  | -3.55232100 | 2.79656000  | O | -3.40043100 | -0.34832100 | -1.03634600 |
| H | 6.84791700  | -2.58643300 | 0.74987500  | C | -3.67640200 | -3.29372600 | -1.26440900 |
| H | 7.53196300  | -1.32583900 | 1.79037000  | O | -3.34863400 | -4.51375200 | -1.88672600 |
| H | 5.77898000  | -1.62237500 | 1.77600700  | N | -5.44322500 | -0.28523100 | -1.98941100 |

|   |             |             |             |   |             |             |             |
|---|-------------|-------------|-------------|---|-------------|-------------|-------------|
| C | -6.53762300 | -0.72722800 | -2.89583400 | H | -0.98916400 | -1.64686300 | -5.02418200 |
| C | -6.17303400 | -0.52624400 | -4.37102000 | H | -1.01376500 | -3.40365700 | -4.95747700 |
| C | -7.70779500 | 0.15657000  | -2.42269400 | H | -1.73634200 | -2.58037000 | -6.36135800 |
| C | -7.03280400 | 1.48163200  | -2.03309900 | C | 1.69995000  | -0.91384100 | 1.57927800  |
| C | -5.71004600 | 1.03651700  | -1.39292200 | H | 2.67471200  | -1.41445600 | 1.57828600  |
| H | -4.87396700 | 1.71381700  | -1.58743600 | H | 1.73078500  | -0.09618700 | 2.30380300  |
| H | -5.79298300 | 0.93263500  | -0.30377900 | H | 0.93945500  | -1.63100900 | 1.89005100  |
| H | -6.84021800 | 2.08557600  | -2.92577400 | N | -0.46470900 | 0.00024300  | -1.33071600 |
| H | -7.63968400 | 2.08459700  | -1.35218400 | C | 0.20889600  | -1.21414900 | -1.67218900 |
| H | -8.47208500 | 0.27135600  | -3.19505500 | O | -0.10369900 | -1.93582600 | -2.61758500 |
| H | -8.18357100 | -0.29445700 | -1.54437000 | N | 1.21846800  | -1.40619600 | -0.80953100 |
| H | -6.75836600 | -1.78252500 | -2.71302600 | C | 1.38635400  | -0.36289500 | 0.19488900  |
| H | -5.89076400 | 0.51357500  | -4.56743800 | C | 0.04629700  | 0.46045700  | 0.11232500  |
| H | -5.35876500 | -1.18286400 | -4.68253100 | O | -0.89320300 | 0.14968700  | 1.03397200  |
| H | -7.04024100 | -0.76450000 | -4.99675900 | H | 2.19738800  | 0.29513100  | -0.12963200 |
| H | -4.81912700 | -2.63801600 | -2.96637200 | H | -1.49377500 | -0.10311900 | -1.33794800 |
| H | -2.87787900 | -5.08004300 | -1.24352700 | H | 1.89490200  | -2.13813500 | -1.02427300 |
| H | -4.57473300 | -3.38153900 | -0.62583100 | O | 0.21443500  | 1.82079700  | 0.06045100  |
| H | -2.86605300 | -2.91572500 | -0.62824300 | H | -0.06060600 | 1.08574300  | -2.24680000 |
| H | -1.93451800 | -2.02428000 | -2.90201200 |   |             |             |             |

**(5R)-MeHYD-EP-II (SkDHPase)**

|   |             |            |             |    |             |             |             |
|---|-------------|------------|-------------|----|-------------|-------------|-------------|
| C | 4.52929700  | 7.28048200 | -1.66789400 | C  | 2.15235200  | 3.71876100  | -3.86660400 |
| C | 3.78104200  | 6.32422700 | -0.81235400 | C  | 1.64273200  | 2.80599600  | -2.76358800 |
| N | 3.13440800  | 6.66423000 | 0.36630500  | O  | 2.51569100  | 2.43688000  | -1.88297000 |
| C | 3.54453800  | 4.98857400 | -0.96601700 | O  | 0.42980900  | 2.54198500  | -2.75338100 |
| C | 2.54549600  | 5.55285000 | 0.87282200  | Zn | 2.33590700  | 2.49778500  | 0.11185300  |
| N | 2.77041100  | 4.51910700 | 0.07836600  | Zn | -1.37138000 | 2.31767500  | 1.46434300  |
| C | 7.43564600  | 0.08926700 | -0.31555400 | H  | 3.88874700  | 8.08881500  | -2.03944400 |
| C | 6.11816900  | 0.59203600 | 0.17815400  | H  | 5.36971700  | 7.74202400  | -1.13656600 |
| N | 5.75090800  | 0.54029400 | 1.51536300  | H  | 3.85677200  | 4.32624400  | -1.75471900 |
| C | 5.04642300  | 1.17267800 | -0.45134800 | H  | 3.10731800  | 7.58279700  | 0.78426500  |
| C | 4.51516200  | 1.07157300 | 1.65318500  | H  | 2.00318000  | 5.52650600  | 1.80595300  |
| N | 4.05943300  | 1.46482100 | 0.47469000  | H  | 7.54729000  | 0.32685800  | -1.37523300 |
| C | 0.67461500  | 4.89005400 | 4.60671900  | H  | 7.52192100  | -0.99617700 | -0.20499300 |
| N | 1.57477500  | 4.16499800 | 3.73699800  | H  | 4.90186500  | 1.39944900  | -1.49608300 |
| C | 1.11849900  | 3.20893600 | 2.85999300  | H  | 6.29524800  | 0.12074300  | 2.25532000  |
| O | -0.15746800 | 3.13788600 | 2.75145500  | H  | 3.98408500  | 1.17264400  | 2.58624800  |
| O | 1.98943400  | 2.53529900 | 2.23865800  | H  | -2.19728200 | 3.86483500  | 4.41650000  |
| C | -3.27319600 | 3.87231600 | 4.22472200  | H  | -5.48979300 | 1.89025300  | 4.80973500  |
| C | -3.71373400 | 2.56357200 | 3.63426700  | H  | -5.40504100 | -0.09593800 | 3.19519200  |
| N | -3.08661400 | 1.94943700 | 2.54922200  | H  | -3.55327300 | 0.14615800  | 1.47716100  |
| C | -4.76889000 | 1.77720700 | 4.01591500  | H  | -1.03608000 | 5.30508000  | -3.43932400 |
| C | -3.76045400 | 0.83337300 | 2.28745400  | H  | -2.69876600 | 5.90102200  | -3.53097000 |
| N | -4.78391900 | 0.69893500 | 3.15269300  | H  | -0.64223500 | 3.43600000  | -1.46174300 |
| C | -1.81335400 | 5.83854500 | -2.88881800 | H  | -3.79320500 | 6.14798000  | -0.85018900 |
| C | -2.09219200 | 5.09422300 | -1.62159400 | H  | -3.77325400 | 4.54984400  | 1.12359600  |
| N | -3.11656900 | 5.40706800 | -0.73683100 | H  | -0.11346800 | 5.36278700  | 4.01790600  |
| C | -1.46054700 | 4.01740700 | -1.05695500 | H  | 1.53283500  | 3.61660600  | -4.75913900 |
| C | -3.07557200 | 4.53882700 | 0.30096600  | H  | 2.08324400  | 4.75670500  | -3.52000300 |
| N | -2.07532000 | 3.68376600 | 0.13656200  | H  | 8.27014600  | 0.55357000  | 0.22142700  |

|   |             |             |             |   |             |             |             |
|---|-------------|-------------|-------------|---|-------------|-------------|-------------|
| H | -3.48064700 | 4.71360300  | 3.55260800  | H | 6.35964400  | -6.61287900 | 3.84822800  |
| H | -3.79913200 | 4.06042600  | 5.16321700  | H | 4.60273500  | -6.76036300 | 3.74399200  |
| H | 1.23539400  | 5.67028000  | 5.12760400  | C | -4.85625000 | -4.26565000 | 6.81495000  |
| H | 0.19862300  | 4.24813700  | 5.35895800  | C | -3.33972300 | -4.27362600 | 6.55941200  |
| H | 4.93419900  | 6.75437400  | -2.53437900 | C | -2.95637000 | -3.75378600 | 5.18930500  |
| H | 3.19765600  | 3.51794300  | -4.11602200 | C | -2.38891200 | -2.48765500 | 5.01551000  |
| H | -1.46423500 | 6.85978300  | -2.69764500 | C | -3.17521700 | -4.52879000 | 4.03865000  |
| H | 2.54323600  | 4.06827100  | 4.00375900  | C | -2.04391200 | -2.00494500 | 3.74945000  |
| C | 5.42070200  | -6.05110200 | 3.90689100  | C | -2.84358800 | -4.06866600 | 2.76903500  |
| C | 5.38866300  | -4.92322500 | 2.86757400  | C | -2.27052000 | -2.79788200 | 2.61849600  |
| C | 6.57575500  | -3.94624800 | 2.97198600  | O | -1.94515800 | -2.40431200 | 1.35252400  |
| C | 6.57644800  | -2.96623400 | 1.79268800  | H | -2.96614400 | -5.29853600 | 6.67964600  |
| C | 6.59667100  | -3.18342000 | 4.30525500  | H | -2.83936000 | -3.67429900 | 7.32910500  |
| C | 6.50038200  | -1.77417400 | -3.93436000 | H | -2.19774600 | -1.86473500 | 5.88668200  |
| C | 5.33130400  | -2.05155600 | -2.99410900 | H | -3.61191500 | -5.51991800 | 4.14009700  |
| S | 5.40823600  | -3.78892600 | -2.36176600 | H | -1.58287600 | -1.02688900 | 3.64050200  |
| C | 0.27999300  | -5.55970300 | -2.43172600 | H | -3.01018300 | -4.67963100 | 1.88693200  |
| C | 1.27349600  | -4.52221200 | -2.95166100 | H | -1.61368500 | -1.48550900 | 1.32729500  |
| O | 1.96692600  | -3.87335500 | -2.15347400 | H | -5.25919600 | -3.24919800 | 6.75045900  |
| C | -0.74293000 | -4.91058200 | -1.47342900 | H | -5.38439400 | -4.87818800 | 6.07717000  |
| C | -1.38452900 | -5.84887900 | -0.46098500 | H | -5.09044200 | -4.66036900 | 7.80899400  |
| O | -2.60480600 | -5.91290900 | -0.28936500 | C | -1.75912300 | -2.31428400 | -5.23287900 |
| N | -0.53719700 | -6.60843100 | 0.28274400  | C | -3.11846600 | -2.21868500 | -4.55165600 |
| N | 1.34984100  | -4.36566800 | -4.28802200 | O | -4.16090100 | -2.49959300 | -5.13674900 |
| C | 2.22089800  | -3.38124500 | -4.93486800 | N | -3.07750200 | -1.82789500 | -3.24150100 |
| H | 5.38587300  | -5.36072000 | 1.86128400  | C | -4.23992800 | -1.87316500 | -2.36987800 |
| H | 4.44902100  | -4.35888100 | 2.95928500  | C | -4.39866400 | -0.52162400 | -1.65781300 |
| H | 7.49821200  | -4.54258400 | 2.91157200  | O | -3.55613600 | -0.15776000 | -0.81232600 |
| H | 6.59132900  | -3.48365900 | 0.82787800  | C | -4.12849700 | -2.98736100 | -1.31348000 |
| H | 7.45336900  | -2.30760400 | 1.83513600  | O | -4.03638500 | -4.22016800 | -1.98770900 |
| H | 5.67493800  | -2.33987800 | 1.80928300  | N | -5.46327500 | 0.25878300  | -1.94282400 |
| H | 7.44813900  | -2.49436600 | 4.35063200  | C | -6.54269500 | 0.01668900  | -2.93696900 |
| H | 5.67873300  | -2.59367800 | 4.43127400  | C | -6.06581300 | 0.25978700  | -4.37163700 |
| H | 6.67730000  | -3.85352800 | 5.16544500  | C | -7.62625800 | 1.00908400  | -2.47068000 |
| H | 5.32268900  | -5.67254200 | 4.92883900  | C | -6.82276200 | 2.20636600  | -1.93907600 |
| H | 5.34403000  | -1.36513400 | -2.14294600 | C | -5.62066100 | 1.54816200  | -1.24764000 |
| H | 4.37727700  | -1.92064600 | -3.50782300 | H | -4.69747000 | 2.13064500  | -1.31532800 |
| H | 4.08616400  | -3.90823700 | -2.10279500 | H | -5.80974600 | 1.36816100  | -0.18131500 |
| H | 7.46317300  | -1.93422500 | -3.43726200 | H | -6.48616900 | 2.83617000  | -2.76911000 |
| H | -1.55680000 | -4.44900600 | -2.03606000 | H | -7.39812500 | 2.83833800  | -1.25714900 |
| H | -0.24702700 | -4.11750300 | -0.90192500 | H | -8.31402800 | 1.27290000  | -3.27759900 |
| H | 0.45678200  | -6.44385900 | 0.28658900  | H | -8.21442300 | 0.56315200  | -1.66066700 |
| H | -0.93476300 | -7.15347400 | 1.03350400  | H | -6.90142300 | -1.01177800 | -2.84123200 |
| H | -0.23868900 | -6.07941000 | -3.24386400 | H | -5.63708900 | 1.26138600  | -4.48084200 |
| H | 3.26406600  | -3.71371200 | -4.91886600 | H | -5.32533500 | -0.48062300 | -4.68160800 |
| H | 2.12102900  | -2.42665800 | -4.41710700 | H | -6.91410400 | 0.17645400  | -5.05951900 |
| H | 0.77893400  | -4.95983500 | -4.86970400 | H | -5.08465000 | -2.10573000 | -3.01799600 |
| H | 0.88080700  | -6.31243300 | -1.90981200 | H | -3.65788500 | -4.87637500 | -1.36883000 |
| H | 1.89906100  | -3.26686500 | -5.97106900 | H | -5.02861700 | -2.93643500 | -0.67249400 |
| H | 6.46665300  | -2.42800700 | -4.81011300 | H | -3.26333500 | -2.79166500 | -0.66947400 |
| H | 6.46994300  | -0.73557300 | -4.28266700 | H | -2.21050000 | -1.46613400 | -2.86082300 |

|   |             |             |             |   |             |             |             |
|---|-------------|-------------|-------------|---|-------------|-------------|-------------|
| H | -0.99887700 | -1.66699900 | -4.78695500 | N | 0.59395500  | -1.44678500 | -1.03312200 |
| H | -1.40995000 | -3.34974500 | -5.15932200 | C | 1.10956400  | -0.63468700 | 0.08643900  |
| H | -1.88245000 | -2.07692800 | -6.29094000 | C | 0.14856700  | 0.49351700  | 0.47336100  |
| C | 1.41440800  | -1.54234300 | 1.28162800  | O | -0.94240600 | 0.27476400  | 1.08977800  |
| H | 2.18208100  | -2.26867500 | 0.99811400  | H | 2.03740600  | -0.13522700 | -0.21997300 |
| H | 1.79282900  | -0.95746400 | 2.12528000  | H | -1.42421800 | 0.01053200  | -1.37360000 |
| H | 0.52157100  | -2.08636400 | 1.59169000  | H | 1.26502700  | -2.18526200 | -1.25619700 |
| N | -0.83293900 | 0.00037200  | -2.19725700 | O | 0.45607700  | 1.69672000  | 0.20446200  |
| C | 0.30307400  | -0.76504900 | -2.23692500 | H | -0.77913500 | 0.85528800  | -2.74133000 |
| O | 0.96278900  | -0.90685400 | -3.26101400 |   |             |             |             |

**(5S)-MeDHU-ES-II (SkDHPase)**

|    |             |             |             |   |             |             |             |
|----|-------------|-------------|-------------|---|-------------|-------------|-------------|
| C  | -6.86514800 | -5.20562900 | -2.00334000 | N | -0.50084200 | 2.40291800  | -0.90017600 |
| C  | -5.90039500 | -4.59561100 | -1.05452200 | C | -1.49630600 | 1.79432700  | -0.02238600 |
| N  | -5.51325800 | -5.14823800 | 0.15738000  | C | -0.80333300 | 1.11335000  | 1.16310700  |
| C  | -5.18761300 | -3.43753700 | -1.15404200 | C | 0.34329200  | 0.26117200  | 0.66772600  |
| C  | -4.59974500 | -4.32502600 | 0.73247100  | O | 0.86640100  | -0.64037600 | 1.37315300  |
| N  | -4.37581100 | -3.28056700 | -0.04742100 | H | -6.52775400 | -6.18453700 | -2.36412200 |
| C  | -6.96439300 | 2.53704100  | -0.57842000 | H | -7.85791700 | -5.34330100 | -1.55873600 |
| C  | -5.96463800 | 1.57158300  | -0.02723000 | H | -5.17531900 | -2.70678700 | -1.94400200 |
| N  | -5.60624700 | 1.54317500  | 1.31288000  | H | -5.85226700 | -6.01283400 | 0.55274000  |
| C  | -5.20488900 | 0.58750300  | -0.60739300 | H | -4.14948900 | -4.49574300 | 1.69953600  |
| C  | -4.67303500 | 0.57922500  | 1.49604900  | H | -7.18166300 | 2.29018000  | -1.61961100 |
| N  | -4.40512800 | -0.01649000 | 0.34630600  | H | -6.59280000 | 3.56674900  | -0.54569000 |
| C  | -2.62940100 | -4.46710500 | 4.43533100  | H | -5.15990100 | 0.26492900  | -1.63564800 |
| N  | -3.18598800 | -3.41003000 | 3.61664900  | H | -5.94674900 | 2.17330900  | 2.02462800  |
| C  | -2.38181300 | -2.65636900 | 2.78894300  | H | -4.22568500 | 0.32082500  | 2.44282800  |
| O  | -1.18068700 | -3.08059100 | 2.66805300  | H | 0.50411300  | -4.49196100 | 4.52823500  |
| O  | -2.90627000 | -1.66078500 | 2.21011400  | H | 4.29848100  | -4.18194400 | 4.51248400  |
| C  | 1.42667600  | -4.97409300 | 4.19419800  | H | 4.98442900  | -2.39794000 | 2.80644800  |
| C  | 2.31897400  | -3.99243500 | 3.49105200  | H | 3.08597800  | -1.80882100 | 1.23858000  |
| N  | 1.93372500  | -3.17726600 | 2.42284700  | H | -0.94367500 | -5.43745500 | -3.56877100 |
| C  | 3.64427800  | -3.76501100 | 3.76326700  | H | 0.42425100  | -6.55289200 | -3.63199200 |
| C  | 3.01660500  | -2.49968000 | 2.06679000  | H | -0.70700800 | -3.54336900 | -1.69550400 |
| N  | 4.07020100  | -2.82286400 | 2.85090000  | H | 1.24712500  | -7.15185500 | -0.84024500 |
| C  | -0.39788200 | -6.19381900 | -3.00183800 | H | 1.68300200  | -5.57024200 | 1.10709700  |
| C  | 0.08427900  | -5.58586000 | -1.73440300 | H | -2.04959900 | -5.14872500 | 3.81171900  |
| N  | 0.87936000  | -6.21333000 | -0.78552700 | H | -2.55440700 | -2.87882300 | -4.86764700 |
| C  | -0.15264800 | -4.34123600 | -1.22844600 | H | -3.55801400 | -3.74165600 | -3.68278300 |
| C  | 1.08839500  | -5.34528900 | 0.23611900  | H | -2.09201800 | 1.06614200  | -0.58217200 |
| N  | 0.47016800  | -4.19995900 | -0.00442900 | H | -2.16938400 | 2.58247600  | 0.31891500  |
| C  | -3.26575100 | -2.75103200 | -4.05012500 | H | -1.49931500 | 0.42115600  | 1.64358100  |
| C  | -2.62308200 | -1.97665800 | -2.89276300 | H | -7.90925100 | 2.50107500  | -0.02501700 |
| O  | -3.42172900 | -1.40807700 | -2.06068900 | H | 1.13499000  | -5.80228600 | 3.53731100  |
| O  | -1.37698200 | -1.99648400 | -2.79074400 | H | 1.94067900  | -5.39676100 | 5.06027800  |
| Zn | -3.14318600 | -1.61547300 | 0.03848200  | H | -3.44625000 | -5.02478500 | 4.90142800  |
| Zn | 0.05493600  | -2.60003600 | 1.22958800  | H | -1.97075400 | -4.09235800 | 5.22969000  |
| N  | 0.90984500  | 0.58798400  | -0.51193800 | H | -6.97930600 | -4.55414200 | -2.87175700 |
| C  | 0.60921700  | 1.74397300  | -1.26538800 | H | -4.16816000 | -2.25166600 | -4.41250300 |
| O  | 1.37214500  | 2.09143100  | -2.16951000 | H | -1.07242500 | -7.04050600 | -2.82629200 |

|   |             |             |             |   |             |             |             |
|---|-------------|-------------|-------------|---|-------------|-------------|-------------|
| H | -4.03054800 | -2.94904700 | 3.92179000  | C | 4.63640800  | 2.90118000  | 6.62257400  |
| H | 1.76276700  | 0.07392800  | -0.78759900 | C | 4.10971600  | 2.51496600  | 5.26301800  |
| H | -0.69300500 | 3.26208100  | -1.41212400 | C | 3.27468600  | 1.40125400  | 5.12413200  |
| O | -1.20994300 | -1.70707100 | -0.05719900 | C | 4.55179900  | 3.15807100  | 4.09962700  |
| H | -1.02583200 | -1.69945200 | -1.02148500 | C | 2.92009400  | 0.91500100  | 3.86892700  |
| C | -2.98230700 | 7.45945700  | 3.83816300  | C | 4.20365200  | 2.69447100  | 2.83406300  |
| C | -3.33071400 | 6.40947900  | 2.77541200  | C | 3.40443800  | 1.55384100  | 2.72152300  |
| C | -4.73083900 | 5.79131800  | 2.97814300  | O | 3.12208200  | 1.09551400  | 1.46785500  |
| C | -5.22333700 | 5.09305300  | 1.70558300  | H | 4.97311300  | 3.94420200  | 6.61890500  |
| C | -4.77205200 | 4.82930200  | 4.17512400  | H | 3.84359000  | 2.82867500  | 7.37717300  |
| C | -5.27883100 | 3.95897300  | -4.12522100 | H | 2.91014600  | 0.89212000  | 6.01353400  |
| C | -4.24201000 | 3.35312300  | -3.18324300 | H | 5.19553900  | 4.03018600  | 4.18754400  |
| S | -3.64043300 | 4.51725200  | -1.87479800 | H | 2.27587600  | 0.04483800  | 3.77260400  |
| C | 2.16926300  | 5.12710200  | -2.77853000 | H | 4.54087500  | 3.19137400  | 1.92943400  |
| C | 0.73500100  | 4.84402900  | -3.20204500 | H | 2.54471900  | 0.31656700  | 1.53193600  |
| O | -0.22739400 | 4.93341400  | -2.42639700 | H | 5.47788700  | 0.93503700  | 7.04582900  |
| C | 2.26936300  | 5.90561300  | -1.46906700 | H | 6.61302200  | 2.05115400  | 6.27939400  |
| C | 3.57730900  | 5.61934500  | -0.73716900 | H | 6.20976300  | 2.23917400  | 7.99482800  |
| O | 4.12829600  | 4.51947900  | -0.77063700 | C | -0.28010000 | 2.12434100  | 2.20564800  |
| N | 4.07627000  | 6.64459900  | -0.00251300 | H | -1.12385900 | 2.68140100  | 2.62435400  |
| N | 0.57937200  | 4.44571000  | -4.48582500 | H | 0.23743200  | 1.61988100  | 3.02366200  |
| C | -0.67526000 | 3.88334500  | -4.96140300 | H | 0.41142800  | 2.84103300  | 1.75480700  |
| H | -3.29017200 | 6.87979700  | 1.78488800  | C | 2.62711200  | 1.43130200  | -5.19014900 |
| H | -2.57567800 | 5.61058700  | 2.76679400  | C | 3.84718500  | 0.85554500  | -4.49480000 |
| H | -5.42522900 | 6.61801000  | 3.18884100  | O | 4.80791400  | 0.43114500  | -5.13546500 |
| H | -5.26591400 | 5.78342300  | 0.85750000  | N | 3.76110200  | 0.82118700  | -3.13847100 |
| H | -6.23233100 | 4.68418800  | 1.84927700  | C | 4.80116300  | 0.25202800  | -2.30602200 |
| H | -4.55420900 | 4.27298200  | 1.41828800  | C | 4.27835200  | -1.04317600 | -1.66783800 |
| H | -5.78522100 | 4.44343200  | 4.33916400  | O | 3.27440300  | -1.00699800 | -0.91952400 |
| H | -4.10617800 | 3.97215500  | 4.00698200  | C | 5.24730600  | 1.23091300  | -1.19441500 |
| H | -4.45597000 | 5.31138500  | 5.10454000  | O | 5.80937600  | 2.39284100  | -1.75673600 |
| H | -2.97093300 | 7.03539400  | 4.84736400  | N | 4.91888400  | -2.20710400 | -1.88774300 |
| H | -4.66046300 | 2.50357400  | -2.63940800 | C | 6.07549900  | -2.46826500 | -2.78960300 |
| H | -3.37321000 | 2.97793000  | -3.72845300 | C | 5.64857400  | -2.55837400 | -4.25827100 |
| H | -2.49896600 | 4.91762200  | -2.47480600 | C | 6.60971900  | -3.79985400 | -2.22905800 |
| H | -6.14692300 | 4.32885600  | -3.57206300 | C | 5.33723000  | -4.55008600 | -1.80357300 |
| H | 1.44995300  | 5.58204300  | -0.81582100 | C | 4.44102000  | -3.44088200 | -1.23338100 |
| H | 2.13540700  | 6.98095900  | -1.62667800 | H | 3.37460500  | -3.58608600 | -1.42621000 |
| H | 3.63716500  | 7.55006900  | 0.03055500  | H | 4.56223400  | -3.34351000 | -0.14871300 |
| H | 4.91919900  | 6.48958100  | 0.53021100  | H | 4.86316700  | -5.01897900 | -2.67144600 |
| H | 2.64381400  | 4.15105800  | -2.62875100 | H | 5.53202100  | -5.33762000 | -1.07061500 |
| H | -1.48987900 | 4.59186600  | -4.79549400 | H | 7.20607600  | -4.34251000 | -2.96630100 |
| H | -0.91151100 | 2.94387400  | -4.44900800 | H | 7.24486300  | -3.61038800 | -1.35610000 |
| H | 1.41122900  | 4.27447900  | -5.03139800 | H | 6.81719900  | -1.67460900 | -2.66846600 |
| H | 2.71032200  | 5.63229900  | -3.58661500 | H | 4.88554100  | -3.33106300 | -4.39955500 |
| H | -0.59266000 | 3.69226900  | -6.03234900 | H | 5.26286800  | -1.60553700 | -4.62584700 |
| H | -4.86393200 | 4.80008800  | -4.68808600 | H | 6.51565100  | -2.82381600 | -4.87301900 |
| H | -5.62541600 | 3.20610500  | -4.84317700 | H | 5.64810000  | 0.06869800  | -2.96604800 |
| H | -3.70993900 | 8.27822700  | 3.83021800  | H | 5.23763800  | 3.14271300  | -1.53021300 |
| H | -1.99386500 | 7.89427000  | 3.65788000  | H | 6.00194300  | 0.71624200  | -0.57812000 |
| C | 5.80219000  | 1.98007000  | 7.01134400  | H | 4.39795600  | 1.45108600  | -0.54045800 |

H 2.93818600 1.21932000 -2.69006600  
H 2.14482800 0.62980600 -5.75856800

H 1.90117300 1.86367500 -4.50079100  
H 2.96293600 2.17745600 -5.91694200

**(5S)-MeDHU-TS1-II (S&DHPase)**

C 4.49692300 7.35309800 -1.74485100  
C 3.66781200 6.43607200 -0.91953300  
N 2.82093300 6.83381700 0.10533000  
C 3.52514500 5.08046900 -0.98171000  
C 2.21110400 5.73220600 0.61149800  
N 2.61402100 4.65139700 -0.03446800  
C 7.37428200 0.16231800 -0.32967500  
C 6.10152600 0.74555200 0.18570100  
N 5.77299700 0.77154200 1.53375700  
C 5.03379500 1.33274500 -0.44205600  
C 4.55802400 1.35125400 1.67587200  
N 4.08126100 1.69973900 0.49226000  
C 0.61627800 5.02388700 4.53677600  
N 1.54572300 4.27228200 3.72125100  
C 1.11018600 3.39987000 2.76081700  
O -0.13822500 3.46711800 2.48714900  
O 1.97447000 2.65539500 2.20579800  
C -3.33398300 4.01700600 4.15132600  
C -3.74959000 2.73684300 3.48828000  
N -3.07218300 2.13991300 2.42303400  
C -4.84155200 1.96724400 3.79652900  
C -3.75936200 1.04867900 2.10337600  
N -4.83320900 0.91097200 2.90885700  
C -1.84727700 5.92397600 -2.97277600  
C -2.12039700 5.13766300 -1.74073300  
N -3.12657000 5.41232600 -0.82568100  
C -1.47227300 4.04630400 -1.23622200  
C -3.05235900 4.50386100 0.17732400  
N -2.05286700 3.66390500 -0.04321700  
C 2.11372000 3.78304200 -3.92317800  
C 1.77286300 2.79889700 -2.80169100  
O 2.70189900 2.53726200 -1.95211400  
O 0.60343700 2.35687800 -2.73199100  
Zn 2.27025600 2.60350800 0.10831800  
Zn -1.22375900 2.36883900 1.28874100  
H 3.88640600 8.07919200 -2.29422400  
H 5.21802000 7.91705900 -1.14180800  
H 3.98225700 4.37865500 -1.65782200  
H 2.68045400 7.78030500 0.42707000  
H 1.51080000 5.75629700 1.43144500  
H 7.45563500 0.34745100 -1.40260500  
H 7.41958200 -0.91980200 -0.17178200  
H 4.86582500 1.51269400 -1.49214300  
H 6.33101000 0.38603100 2.28187300  
H 4.05062500 1.50795000 2.61436300  
H -2.29308300 3.96632400 4.48194200  
H -5.60000100 2.07937100 4.55485300

H -5.47159300 0.12914900 2.89700400  
H -3.52424900 0.36647900 1.29826300  
H -1.03950500 5.44345200 -3.52771000  
H -2.71952300 5.97667700 -3.63444300  
H -0.65590000 3.50354300 -1.68761300  
H -3.81021700 6.15193300 -0.89548200  
H -3.72375300 4.47781700 1.02086000  
H -0.11484800 5.52528300 3.90111000  
H 1.41217800 3.67869100 -4.75216300  
H 2.03954000 4.80039600 -3.52234100  
H 8.25011100 0.61071800 0.15262000  
H -3.41310800 4.87379500 3.47165900  
H -3.96855400 4.21676500 5.01751100  
H 1.16766500 5.77968600 5.10194200  
H 0.06969400 4.39298900 5.24984000  
H 5.06041200 6.77193700 -2.47711200  
H 3.13797700 3.64134400 -4.27704600  
H -1.54073400 6.95230900 -2.74711400  
H 2.48700300 4.12343100 4.05102000  
C 5.32599000 -5.93873000 3.93356400  
C 5.30085600 -4.81864900 2.88563900  
C 6.49755300 -3.85202800 2.97537200  
C 6.50223200 -2.87915900 1.78942700  
C 6.53544200 -3.08061700 4.30320900  
C 6.44268100 -1.72533500 -3.93684900  
C 5.36144000 -2.18070300 -2.96122800  
S 5.61365600 -3.95167900 -2.48433900  
C -0.00020300 -5.40461300 -2.57291900  
C 1.18799600 -4.58174700 -3.06486000  
O 2.14659300 -4.30217100 -2.32713300  
C -0.04017800 -5.47467000 -1.04022500  
C -1.21416300 -6.30394900 -0.54317200  
O -2.38348800 -5.93003500 -0.64135300  
N -0.90439000 -7.50148600 0.01563000  
N 1.15504200 -4.21071200 -4.36219300  
C 2.16042600 -3.32508600 -4.93726300  
H 5.28782800 -5.26426800 1.88296500  
H 4.36678900 -4.24487200 2.97786700  
H 7.41378700 -4.45762900 2.91204700  
H 6.49978600 -3.40550100 0.82890400  
H 7.39057900 -2.23596700 1.81886600  
H 5.61408100 -2.23319700 1.81374800  
H 7.39353300 -2.39927300 4.33771900  
H 5.62422800 -2.48129800 4.43201000  
H 6.61618600 -3.74614900 5.16689000  
H 5.23610200 -5.55137700 4.95292300  
H 5.36881700 -1.56289800 -2.05833300

|   |             |             |             |   |             |             |             |
|---|-------------|-------------|-------------|---|-------------|-------------|-------------|
| H | 4.37239600  | -2.09135100 | -3.41460600 | H | 2.52378000  | -0.02552600 | -0.69190000 |
| H | 4.30857900  | -4.24802400 | -2.29866800 | H | 3.06069300  | -1.44081100 | 0.21714000  |
| H | 7.44383600  | -1.84470100 | -3.50942500 | H | 1.74909500  | 0.32381000  | 1.58220900  |
| H | -0.17575000 | -4.46408900 | -0.64825600 | H | -1.52616300 | -0.50494400 | -0.82759900 |
| H | 0.91363800  | -5.85379900 | -0.66411200 | H | 1.88747700  | -2.58404600 | -1.49450300 |
| H | 0.04512500  | -7.81489800 | 0.13118600  | O | 0.46813400  | 1.74888000  | -0.09449700 |
| H | -1.65760400 | -8.08282000 | 0.35283700  | H | 0.36265500  | 1.75955100  | -1.08217900 |
| H | -0.93275600 | -4.96876000 | -2.94397700 | C | 1.05946500  | -1.66782600 | 2.01410800  |
| H | 3.15820400  | -3.70884900 | -4.71720000 | H | 2.02420100  | -2.01151400 | 2.40109300  |
| H | 2.07022200  | -2.30804200 | -4.53887500 | H | 0.44620200  | -1.35518900 | 2.86064900  |
| H | 0.29118200  | -4.33780100 | -4.86861900 | H | 0.56540500  | -2.51480000 | 1.53252500  |
| H | 0.08076600  | -6.41249000 | -3.00159900 | C | -1.80610400 | -2.27897800 | -5.24917900 |
| H | 2.02465000  | -3.29492700 | -6.01942100 | C | -3.15547000 | -2.14083900 | -4.56775600 |
| H | 6.40690800  | -2.30510800 | -4.86300400 | O | -4.20418000 | -2.17089100 | -5.21072200 |
| H | 6.30819400  | -0.66704000 | -4.18810100 | N | -3.08472200 | -1.95332200 | -3.22515400 |
| H | 6.25891200  | -6.51055800 | 3.87527900  | C | -4.26113400 | -1.86945100 | -2.38487400 |
| H | 4.49972700  | -6.64010100 | 3.77916200  | C | -4.31672100 | -0.47408600 | -1.75028900 |
| C | -4.95277100 | -4.09546300 | 6.79881000  | O | -3.40948400 | -0.10539700 | -0.97192500 |
| C | -3.50229900 | -4.47058400 | 6.45894800  | C | -4.23826200 | -2.95165900 | -1.28432000 |
| C | -3.07368300 | -3.85530200 | 5.14818000  | O | -4.26284400 | -4.21944500 | -1.89248900 |
| C | -2.59995800 | -2.54026000 | 5.09578800  | N | -5.35370700 | 0.34340600  | -2.02343200 |
| C | -3.23188600 | -4.54384300 | 3.93725300  | C | -6.49670400 | 0.11046800  | -2.95116900 |
| C | -2.31100100 | -1.91935800 | 3.88146600  | C | -6.10616500 | 0.31652900  | -4.41974700 |
| C | -2.94383900 | -3.94642300 | 2.71401900  | C | -7.52299400 | 1.14010200  | -2.44014500 |
| C | -2.49065900 | -2.62273400 | 2.68357300  | C | -6.65725300 | 2.33316800  | -2.00476700 |
| O | -2.23958600 | -2.06516400 | 1.46592300  | C | -5.42034200 | 1.66943900  | -1.38185100 |
| H | -3.40888000 | -5.56176300 | 6.40993300  | H | -4.49015600 | 2.21938600  | -1.54857900 |
| H | -2.84033100 | -4.13643500 | 7.26716300  | H | -5.52849000 | 1.54159000  | -0.29772300 |
| H | -2.46000000 | -1.98555300 | 6.02118800  | H | -6.37179900 | 2.93268400  | -2.87499600 |
| H | -3.59322000 | -5.56954000 | 3.95259500  | H | -7.16802500 | 2.99621900  | -1.30113300 |
| H | -1.94446400 | -0.89643600 | 3.85646400  | H | -8.25934000 | 1.39639800  | -3.20548300 |
| H | -3.05764800 | -4.48793800 | 1.77978700  | H | -8.06216100 | 0.73264200  | -1.57731300 |
| H | -1.87056100 | -1.16444500 | 1.56936200  | H | -6.87388800 | -0.90609200 | -2.81243000 |
| H | -5.06484800 | -3.00926200 | 6.88178300  | H | -5.69170000 | 1.31772500  | -4.57965800 |
| H | -5.63757900 | -4.44023700 | 6.01730500  | H | -5.38149700 | -0.42887000 | -4.75316900 |
| H | -5.27027700 | -4.54102500 | 7.74784900  | H | -6.99724800 | 0.21496000  | -5.04892000 |
| N | -0.52368500 | -0.60837000 | -0.62378700 | H | -5.11455100 | -2.05805400 | -3.03547500 |
| C | 0.14486000  | -1.60050000 | -1.33599900 | H | -3.57449500 | -4.77370000 | -1.48659700 |
| O | -0.46023900 | -2.28774900 | -2.17219500 | H | -5.12413600 | -2.80290100 | -0.64161800 |
| N | 1.44397200  | -1.79024400 | -1.03608900 | H | -3.35740000 | -2.80320500 | -0.65018600 |
| C | 2.17768900  | -0.90664700 | -0.14348300 | H | -2.17415400 | -2.01674400 | -2.77025600 |
| C | 1.28791300  | -0.49993900 | 1.03652500  | H | -1.69409500 | -1.46290300 | -5.96943300 |
| C | -0.04718600 | 0.02256400  | 0.51448200  | H | -0.96850100 | -2.26197200 | -4.55062300 |
| O | -0.95637700 | 0.40431400  | 1.36213100  | H | -1.80716800 | -3.20937100 | -5.82718000 |

**(5S)-MeDHU-INT-II (SkDHPase)**

|   |            |            |             |   |            |            |             |
|---|------------|------------|-------------|---|------------|------------|-------------|
| C | 3.78166100 | 7.70225100 | -1.76397800 | N | 2.08402100 | 4.84888600 | -0.11292300 |
| C | 2.98098200 | 6.72212300 | -0.98428200 | C | 7.33625500 | 0.83858500 | -0.26591900 |
| N | 1.93665900 | 7.03908900 | -0.12599600 | C | 6.02668100 | 1.32762000 | 0.24479400  |
| C | 3.05417800 | 5.36058200 | -0.95345200 | N | 5.68353100 | 1.32420000 | 1.58899000  |
| C | 1.42749400 | 5.88572500 | 0.37740200  | C | 4.92733700 | 1.83494700 | -0.39445800 |

|    |             |             |             |   |             |             |             |
|----|-------------|-------------|-------------|---|-------------|-------------|-------------|
| C  | 4.42732000  | 1.80934800  | 1.71894600  | H | -0.40712200 | 4.39930200  | 5.23465600  |
| N  | 3.94116900  | 2.12551500  | 0.53001700  | H | 4.51856000  | 7.16835200  | -2.36667900 |
| C  | 0.09151400  | 5.05082200  | 4.50468900  | H | 2.79775300  | 3.82390500  | -4.32023100 |
| N  | 1.06307400  | 4.34619300  | 3.69746100  | H | -2.21319100 | 6.71077900  | -2.81336100 |
| C  | 0.71195600  | 3.52229400  | 2.66839000  | H | 2.00875100  | 4.24711200  | 4.03234700  |
| O  | -0.51706300 | 3.55838200  | 2.30754100  | C | 5.85686000  | -5.40194100 | 4.03066800  |
| O  | 1.63943200  | 2.84064400  | 2.12921900  | C | 5.73160500  | -4.29752400 | 2.97335600  |
| C  | -3.73761100 | 3.65902600  | 4.09523200  | C | 6.82628500  | -3.21605600 | 3.05705500  |
| C  | -4.05004200 | 2.32556200  | 3.48849300  | C | 6.72167600  | -2.24630700 | 1.87317300  |
| N  | -3.33395300 | 1.77799900  | 2.42577000  | C | 6.79628300  | -2.44629300 | 4.38601600  |
| C  | -5.04705700 | 1.45086100  | 3.83178500  | C | 6.62624800  | -1.15795600 | -3.86488000 |
| C  | -3.89918800 | 0.60856900  | 2.13793000  | C | 5.57243800  | -1.68472900 | -2.89516500 |
| N  | -4.93756400 | 0.38085200  | 2.96543000  | S | 5.97524300  | -3.41141100 | -2.36242300 |
| C  | -2.38093200 | 5.64952500  | -3.03197200 | C | 0.51881900  | -5.42114000 | -2.53388800 |
| C  | -2.59844400 | 4.85092600  | -1.79504300 | C | 1.64538200  | -4.51257100 | -3.02302100 |
| N  | -3.66501100 | 5.02514300  | -0.92523600 | O | 2.58831900  | -4.18405500 | -2.28589000 |
| C  | -1.85300600 | 3.84597900  | -1.24298100 | C | 0.43681400  | -5.42614900 | -0.99924600 |
| C  | -3.53249100 | 4.14618200  | 0.09693800  | C | -0.59972200 | -6.41053500 | -0.48282100 |
| N  | -2.43740600 | 3.42061800  | -0.06612700 | O | -1.80928500 | -6.17516100 | -0.47830600 |
| C  | 1.77895600  | 3.89986300  | -3.93217400 | N | -0.11758600 | -7.59705400 | -0.03029900 |
| C  | 1.55188400  | 2.90372500  | -2.79873400 | N | 1.58451000  | -4.13015400 | -4.31698500 |
| O  | 2.50066500  | 2.75440500  | -1.94871200 | C | 2.53027800  | -3.17683700 | -4.88707900 |
| O  | 0.43500400  | 2.33376900  | -2.71744200 | H | 5.76681500  | -4.75051200 | 1.97455600  |
| Zn | 2.06196300  | 2.79111800  | 0.10722700  | H | 4.74545500  | -3.81707400 | 3.05592900  |
| Zn | -1.61423400 | 2.22511700  | 1.35277200  | H | 7.79868600  | -3.72548700 | 2.98505600  |
| H  | 3.15924700  | 8.29375700  | -2.44535400 | H | 6.76382200  | -2.76876500 | 0.91145100  |
| H  | 4.32379600  | 8.40341200  | -1.11899100 | H | 7.54090500  | -1.51669100 | 1.89695800  |
| H  | 3.70601400  | 4.70853500  | -1.50873100 | H | 5.77217700  | -1.69478300 | 1.90677800  |
| H  | 1.60650500  | 7.96830100  | 0.09024200  | H | 7.58028000  | -1.68047600 | 4.41507100  |
| H  | 0.60055200  | 5.83783500  | 1.06912300  | H | 5.82924600  | -1.94441500 | 4.52368700  |
| H  | 7.40702500  | 1.02942400  | -1.33859400 | H | 6.95239500  | -3.10143900 | 5.24726400  |
| H  | 7.45845800  | -0.23771200 | -0.10874300 | H | 5.72404100  | -5.01701900 | 5.04633000  |
| H  | 4.75736700  | 1.99729000  | -1.44693100 | H | 5.50455600  | -1.04437600 | -2.01060100 |
| H  | 6.25813900  | 0.97178500  | 2.34105700  | H | 4.58848300  | -1.69961900 | -3.36717000 |
| H  | 3.89542300  | 1.91308300  | 2.65126100  | H | 4.69846900  | -3.83217100 | -2.22323200 |
| H  | -2.68867100 | 3.71531700  | 4.39863900  | H | 7.62541300  | -1.17087300 | -3.41669300 |
| H  | -5.80260800 | 1.49725800  | 4.59961100  | H | 0.13439100  | -4.43122200 | -0.66764100 |
| H  | -5.48096200 | -0.46977400 | 2.98861400  | H | 1.42732700  | -5.63630900 | -0.58670700 |
| H  | -3.59340600 | -0.06642500 | 1.34867100  | H | 0.86779000  | -7.79764900 | 0.01535900  |
| H  | -1.50181400 | 5.26716700  | -3.55381200 | H | -0.77462000 | -8.28417800 | 0.30864500  |
| H  | -3.23038800 | 5.58356800  | -3.72125300 | H | -0.43794900 | -5.09523200 | -2.95285300 |
| H  | -0.96767200 | 3.38393400  | -1.65233500 | H | 3.54966900  | -3.48728500 | -4.65195900 |
| H  | -4.42639300 | 5.67806700  | -1.04072600 | H | 2.36264000  | -2.16660600 | -4.49602200 |
| H  | -4.23242300 | 4.05691500  | 0.91284900  | H | 0.72168600  | -4.29213200 | -4.81509500 |
| H  | -0.67290800 | 5.48810600  | 3.86131300  | H | 0.71513500  | -6.43359000 | -2.91205100 |
| H  | 1.05805100  | 3.74338700  | -4.73557000 | H | 2.40577600  | -3.16323400 | -5.97106100 |
| H  | 1.65629900  | 4.91194500  | -3.53028300 | H | 6.66367200  | -1.76506200 | -4.77322000 |
| H  | 8.17771700  | 1.34684800  | 0.21840500  | H | 6.39927600  | -0.12439500 | -4.15094400 |
| H  | -3.91285800 | 4.47924600  | 3.38916400  | H | 6.83997200  | -5.88372600 | 3.98263200  |
| H  | -4.36412700 | 3.83390800  | 4.97262100  | H | 5.10146000  | -6.17913800 | 3.87680500  |
| H  | 0.59282000  | 5.85343500  | 5.05145200  | C | -4.57821900 | -4.55312200 | 6.79630900  |



|   |             |             |             |   |             |             |             |
|---|-------------|-------------|-------------|---|-------------|-------------|-------------|
| C | -3.06394000 | -4.51970500 | 6.53266000  | H | 0.53899100  | -1.14238300 | 2.77377500  |
| C | -2.72415800 | -3.84988400 | 5.21994000  | H | 0.64793000  | -2.31920100 | 1.46189900  |
| C | -2.36108700 | -2.50098500 | 5.15989100  | C | -1.51664500 | -2.52662000 | -5.24010200 |
| C | -2.82024400 | -4.55270700 | 4.00867200  | C | -2.87550300 | -2.47870000 | -4.56277300 |
| C | -2.11503500 | -1.86320100 | 3.94186200  | O | -3.91363700 | -2.64824700 | -5.20220600 |
| C | -2.57680100 | -3.93882400 | 2.78528900  | N | -2.82657500 | -2.20443300 | -3.23432900 |
| C | -2.22842100 | -2.58112000 | 2.74371900  | C | -3.99942500 | -2.27243300 | -2.38522100 |
| O | -2.02699500 | -2.02184700 | 1.52084400  | C | -4.24120600 | -0.89389200 | -1.75561900 |
| H | -2.67637900 | -5.54592500 | 6.53671800  | O | -3.40691700 | -0.41230000 | -0.96157400 |
| H | -2.56285000 | -3.99678600 | 7.35594800  | C | -3.81454100 | -3.33398100 | -1.28231900 |
| H | -2.26710000 | -1.93247100 | 6.08278500  | O | -3.64692300 | -4.58590900 | -1.90100200 |
| H | -3.08834900 | -5.60677900 | 4.02532700  | N | -5.36701400 | -0.21066100 | -2.05810200 |
| H | -1.82676000 | -0.81569400 | 3.91638600  | C | -6.45395500 | -0.58685900 | -3.00415000 |
| H | -2.63342300 | -4.49642400 | 1.85530800  | C | -6.05736800 | -0.35869700 | -4.46738900 |
| H | -1.62892800 | -1.12014300 | 1.57550600  | C | -7.60306300 | 0.32547200  | -2.53254600 |
| H | -4.99024400 | -3.53903200 | 6.83552000  | C | -6.88855700 | 1.61504300  | -2.09800200 |
| H | -5.10242500 | -5.09261600 | 6.00081600  | C | -5.60341400 | 1.10238300  | -1.43294200 |
| H | -4.80607700 | -5.04776200 | 7.74657100  | H | -4.73725500 | 1.75395000  | -1.57924900 |
| N | -0.38878500 | -0.57774600 | -0.73466000 | H | -5.72845900 | 0.97268200  | -0.35021600 |
| C | 0.31848400  | -1.58103000 | -1.34941200 | H | -6.64773700 | 2.22769400  | -2.97288600 |
| O | -0.23548300 | -2.38652600 | -2.12457900 | H | -7.48907800 | 2.22861600  | -1.42060800 |
| N | 1.64216400  | -1.66767600 | -1.07525900 | H | -8.34647000 | 0.48613600  | -3.31705700 |
| C | 2.32870100  | -0.74163500 | -0.19270100 | H | -8.11260400 | -0.12841700 | -1.67475600 |
| C | 1.39704900  | -0.32185400 | 0.95062900  | H | -6.71545600 | -1.63811500 | -2.85672900 |
| C | 0.09261200  | 0.25305100  | 0.34714600  | H | -5.74914000 | 0.67912800  | -4.63420900 |
| O | -0.89148900 | 0.46100600  | 1.25796100  | H | -5.25135000 | -1.02694900 | -4.77632900 |
| H | 2.67355800  | 0.13325600  | -0.75585100 | H | -6.91880000 | -0.56322900 | -5.11281100 |
| H | 3.21563800  | -1.24176000 | 0.20786700  | H | -4.82575200 | -2.57990000 | -3.02579500 |
| H | 1.85427600  | 0.50158800  | 1.50182300  | H | -2.99208600 | -5.09962900 | -1.39473500 |
| H | -1.40368300 | -0.60048300 | -0.86313300 | H | -4.71054200 | -3.31648400 | -0.63490600 |
| H | 2.12010600  | -2.46979600 | -1.47665400 | H | -2.96154600 | -3.05347000 | -0.65374600 |
| O | 0.43505800  | 1.59035000  | -0.24409100 | H | -1.91309800 | -2.20097600 | -2.77334600 |
| H | 0.34098200  | 1.61481700  | -1.25228100 | H | -1.48258500 | -1.75479900 | -6.01492900 |
| C | 1.15079700  | -1.47224000 | 1.93315300  | H | -0.68901400 | -2.38185700 | -4.54401700 |
| H | 2.10829600  | -1.82646400 | 2.33029900  | H | -1.42621300 | -3.49053000 | -5.75278700 |

**(5S)-MeDHU-TS2-II (SkDHPase)**

|   |             |            |             |   |             |            |             |
|---|-------------|------------|-------------|---|-------------|------------|-------------|
| C | 3.36749800  | 7.59130700 | -2.44839400 | C | 0.65052800  | 3.62399200 | 2.61090800  |
| C | 2.72151600  | 6.64931400 | -1.49692200 | O | -0.58345200 | 3.33908700 | 2.46895400  |
| N | 1.94389400  | 7.03302800 | -0.41440800 | O | 1.65598900  | 3.01645600 | 2.13292500  |
| C | 2.71907900  | 5.28449600 | -1.45950500 | C | -3.93019800 | 3.79903900 | 3.84285200  |
| C | 1.51003200  | 5.91837000 | 0.22409800  | C | -4.14267300 | 2.41473800 | 3.30305300  |
| N | 1.95926500  | 4.83842900 | -0.39448300 | N | -3.36132500 | 1.82837300 | 2.30591200  |
| C | 7.22536300  | 1.05476100 | -0.35564800 | C | -5.11754000 | 1.52373700 | 3.66995900  |
| C | 5.91310000  | 1.54475700 | 0.13771600  | C | -3.87137500 | 0.62260700 | 2.08321200  |
| N | 5.58625700  | 1.61426600 | 1.48292500  | N | -4.93412100 | 0.40363500 | 2.88483600  |
| C | 4.79219200  | 1.97637000 | -0.51787200 | C | -2.70911100 | 5.16962700 | -3.45304700 |
| C | 4.31637400  | 2.06313500 | 1.59908800  | C | -2.78368100 | 4.53070500 | -2.10871300 |
| N | 3.80610000  | 2.28720500 | 0.39848000  | N | -3.79126800 | 4.79959800 | -1.19364300 |
| C | -0.16209000 | 5.38406300 | 4.07951000  | C | -1.97141000 | 3.62427500 | -1.47890000 |
| N | 0.90670500  | 4.76292000 | 3.33759300  | C | -3.56307400 | 4.06949400 | -0.07545100 |

|    |             |             |             |   |             |             |             |
|----|-------------|-------------|-------------|---|-------------|-------------|-------------|
| N  | -2.46330100 | 3.35087300  | -0.21721100 | H | 6.83730500  | -2.38634200 | 1.20673500  |
| Zn | 1.87984300  | 2.83371300  | 0.05141500  | H | 7.48016700  | -0.99750600 | 2.09916700  |
| Zn | -1.55139300 | 2.17622300  | 1.20404500  | H | 5.73110200  | -1.31983600 | 2.08131900  |
| H  | 2.63368600  | 8.20676400  | -2.98168400 | H | 7.45042000  | -0.94627800 | 4.62455700  |
| H  | 4.06636200  | 8.27016200  | -1.94634300 | H | 5.72337200  | -1.34223100 | 4.70954400  |
| H  | 3.19790600  | 4.58464800  | -2.12202600 | H | 6.91049200  | -2.33878000 | 5.55911900  |
| H  | 1.74113600  | 7.98199000  | -0.13575900 | H | 5.84460300  | -4.35544400 | 5.49260500  |
| H  | 0.92125200  | 5.92926900  | 1.12901200  | H | 5.55456600  | -0.98709300 | -1.85699300 |
| H  | 7.28773200  | 1.19063000  | -1.43730800 | H | 4.62137700  | -1.90994200 | -3.03280100 |
| H  | 7.36937200  | -0.00967300 | -0.14342500 | H | 4.96791700  | -3.80857800 | -1.58155000 |
| H  | 4.60931200  | 2.06172000  | -1.57697800 | H | 7.59789200  | -1.16857800 | -3.36822600 |
| H  | 6.17890500  | 1.32402300  | 2.24730900  | H | 1.48684800  | -5.38824800 | -0.04243400 |
| H  | 3.78954000  | 2.21073200  | 2.52812800  | H | 1.07691600  | -7.10041800 | -0.08666600 |
| H  | -2.88179300 | 3.95118700  | 4.11248800  | H | -0.88849500 | -6.14554900 | 1.10403300  |
| H  | -5.90354000 | 1.59154400  | 4.40514800  | H | -2.22816100 | -5.65473900 | 0.07838300  |
| H  | -5.43785400 | -0.46822200 | 2.95348700  | H | 1.22753000  | -6.86300800 | -2.70109900 |
| H  | -3.50101000 | -0.09516900 | 1.36465300  | H | 3.63511000  | -3.42225200 | -4.36523400 |
| H  | -1.86330800 | 4.75673600  | -4.00615700 | H | 2.01122200  | -2.70394700 | -4.17132100 |
| H  | -3.61245000 | 4.98575200  | -4.04554200 | H | 1.55014400  | -5.44399200 | -4.35849800 |
| H  | -1.09363200 | 3.12253200  | -1.85421100 | H | 2.72844200  | -6.86997900 | -1.76712300 |
| H  | -4.57337700 | 5.42111200  | -1.33941300 | H | 2.39052800  | -3.69293200 | -5.60063800 |
| H  | -4.20559000 | 4.07362400  | 0.79047800  | H | 6.61526700  | -2.03046600 | -4.55587300 |
| H  | -0.98258600 | 5.64568800  | 3.40925700  | H | 6.24988100  | -0.33910000 | -4.16218600 |
| H  | 8.06141300  | 1.60177900  | 0.09488200  | H | 7.06765900  | -5.20940100 | 4.54247000  |
| H  | -4.19305600 | 4.57295700  | 3.11113200  | H | 5.36553500  | -5.66419200 | 4.41346600  |
| H  | -4.54920300 | 3.95858800  | 4.72853800  | C | -4.39691800 | -4.15256200 | 7.30637900  |
| H  | 0.21064500  | 6.30066700  | 4.54516000  | C | -2.91605400 | -3.90936100 | 6.96685500  |
| H  | -0.56689300 | 4.73803700  | 4.86917600  | C | -2.68470000 | -3.38654000 | 5.56272100  |
| H  | 3.93201100  | 7.02741900  | -3.19329900 | C | -2.16746000 | -2.10863200 | 5.32491700  |
| H  | -2.57132000 | 6.25511200  | -3.38461400 | C | -2.98517900 | -4.17785200 | 4.44225500  |
| H  | 1.85386900  | 4.85128500  | 3.67504600  | C | -1.95054600 | -1.62660700 | 4.03021900  |
| C  | 6.04610800  | -4.81343600 | 4.51951800  | C | -2.77857700 | -3.71689300 | 3.14741500  |
| C  | 5.86609200  | -3.81908800 | 3.36529100  | C | -2.25201900 | -2.43389200 | 2.92462900  |
| C  | 6.86634900  | -2.64657700 | 3.38411400  | O | -2.08483900 | -2.04568900 | 1.63612600  |
| C  | 6.72236700  | -1.79139800 | 2.11908800  | H | -2.36519500 | -4.84977700 | 7.10192100  |
| C  | 6.73089000  | -1.77344100 | 4.64073800  | H | -2.49012000 | -3.20323700 | 7.68905200  |
| C  | 6.57790800  | -1.29805200 | -3.74501100 | H | -1.92194200 | -1.46949000 | 6.17023300  |
| C  | 5.62659000  | -1.74806700 | -2.63946400 | H | -3.38465600 | -5.17919400 | 4.58701100  |
| S  | 6.19817000  | -3.33779800 | -1.88309300 | H | -1.54641900 | -0.63055900 | 3.87390000  |
| C  | 1.81017200  | -6.30416200 | -1.96460000 | H | -3.01367400 | -4.33728800 | 2.28833500  |
| C  | 2.26343100  | -4.96328800 | -2.52519400 | H | -1.61052900 | -1.17594200 | 1.51730400  |
| O  | 2.81101600  | -4.11765100 | -1.79592200 | H | -4.97422800 | -3.22507500 | 7.23098500  |
| C  | 1.02357800  | -6.16767900 | -0.65894200 | H | -4.84798800 | -4.87947400 | 6.62341100  |
| C  | -0.44404700 | -5.81186700 | -0.88971100 | H | -4.50707200 | -4.53883000 | 8.32481500  |
| O  | -0.86603800 | -5.46858800 | -1.99890600 | C | -1.51496500 | -3.12364600 | -4.90928600 |
| N  | -1.24860600 | -5.91246400 | 0.19298700  | C | -2.87458200 | -3.10937200 | -4.24412000 |
| N  | 2.12398000  | -4.78693900 | -3.85199300 | O | -3.91514000 | -3.39560700 | -4.83469900 |
| C  | 2.56614100  | -3.57549300 | -4.53039800 | N | -2.82235200 | -2.74219400 | -2.93308400 |
| H  | 5.97297600  | -4.35153000 | 2.41187200  | C | -3.99257400 | -2.62685800 | -2.09249800 |
| H  | 4.84204400  | -3.41788700 | 3.37878100  | C | -4.18048100 | -1.15274800 | -1.70261800 |
| H  | 7.87854400  | -3.07758700 | 3.38134500  | O | -3.26693300 | -0.54752300 | -1.11143500 |

|   |             |             |             |   |             |             |             |
|---|-------------|-------------|-------------|---|-------------|-------------|-------------|
| C | -3.80503300 | -3.48279000 | -0.82331800 | C | 1.53502400  | 3.50176100  | -4.19246400 |
| O | -3.58433100 | -4.84823400 | -1.14403500 | C | 1.39343500  | 2.48587600  | -3.05376800 |
| N | -5.34862100 | -0.53668400 | -1.98665300 | O | 2.25656900  | 2.48007800  | -2.13968400 |
| C | -6.47919100 | -1.05821300 | -2.79920100 | O | 0.35802600  | 1.73070200  | -3.10956400 |
| C | -6.13976700 | -1.08732400 | -4.29304700 | N | -0.18970200 | -0.16290100 | -1.21832900 |
| C | -7.60246700 | -0.06658000 | -2.43947500 | C | 0.46122600  | -1.37251900 | -1.64555600 |
| C | -6.86670200 | 1.27179000  | -2.26282100 | O | -0.11927600 | -2.19587400 | -2.35329000 |
| C | -5.54232300 | 0.87087300  | -1.59494800 | N | 1.74397500  | -1.48670600 | -1.27070800 |
| H | -4.68647900 | 1.47335800  | -1.91191600 | C | 2.35467700  | -0.53457500 | -0.35302500 |
| H | -5.59543500 | 0.93997000  | -0.50119100 | C | 1.38796400  | -0.20704300 | 0.79310100  |
| H | -6.67792300 | 1.73158300  | -3.23815100 | C | 0.10439900  | 0.47201200  | 0.23113800  |
| H | -7.43133700 | 1.99139300  | -1.66362000 | O | -0.99568100 | 0.29473700  | 1.00891100  |
| H | -8.38046900 | -0.03432000 | -3.20592700 | H | 0.91925900  | 3.22076300  | -5.04755000 |
| H | -8.07282200 | -0.36391000 | -1.49523400 | H | 1.21540300  | 4.48296000  | -3.82612400 |
| H | -6.73845500 | -2.06562100 | -2.46085700 | H | 2.63485200  | 0.36769400  | -0.90096100 |
| H | -5.84334300 | -0.09340500 | -4.64526500 | H | 3.27162200  | -0.98564200 | 0.03447800  |
| H | -5.34105400 | -1.79626600 | -4.51944900 | H | 1.84605500  | 0.55466500  | 1.43003900  |
| H | -7.02298400 | -1.39647800 | -4.86321400 | H | 2.58192200  | 3.58187900  | -4.49343600 |
| H | -4.82821400 | -3.01912500 | -2.67046100 | H | -1.20844100 | -0.30796800 | -1.27654800 |
| H | -2.80819300 | -4.89937300 | -1.73994100 | H | 2.18967900  | -2.38071900 | -1.48839700 |
| H | -4.71712000 | -3.44545200 | -0.21580100 | O | 0.24954600  | 1.82160900  | -0.03110000 |
| H | -2.98862400 | -3.06312700 | -0.22580100 | H | 0.14252900  | 0.84262500  | -2.14695300 |
| H | -1.91152500 | -2.48606900 | -2.55054300 | C | 1.12444800  | -1.44324000 | 1.66166000  |
| H | -1.07915800 | -2.12060900 | -4.91071800 | H | 2.07745300  | -1.88127600 | 1.97974400  |
| H | -0.83129000 | -3.77202300 | -4.35570200 | H | 0.56308500  | -1.17691100 | 2.55761700  |
| H | -1.63101200 | -3.47682800 | -5.93456600 | H | 0.56057600  | -2.21621400 | 1.13434100  |

**(5S)-MeDHU-EP-II (SkDHPase)**

|   |             |             |             |    |             |             |             |
|---|-------------|-------------|-------------|----|-------------|-------------|-------------|
| C | 4.83828700  | 6.86109800  | -2.57605400 | C  | -1.58709400 | 5.60426000  | -3.54242800 |
| C | 4.02956700  | 6.08991700  | -1.59880300 | C  | -1.84046300 | 4.95784300  | -2.22039600 |
| N | 3.35828700  | 6.63514400  | -0.51447600 | N  | -2.79826900 | 5.41753200  | -1.32724400 |
| C | 3.75193200  | 4.75578500  | -1.54543600 | C  | -1.25271000 | 3.89084500  | -1.58985100 |
| C | 2.71504200  | 5.63699600  | 0.14097400  | C  | -2.76211600 | 4.64670000  | -0.21755900 |
| N | 2.92824100  | 4.48248000  | -0.46933600 | N  | -1.82880000 | 3.71439500  | -0.34222900 |
| C | 7.40234300  | -0.23835000 | -0.33714100 | Zn | 2.48852900  | 2.49311900  | -0.13144800 |
| C | 6.16955500  | 0.44856500  | 0.13236400  | Zn | -1.16757800 | 2.59637100  | 1.21416700  |
| N | 5.87634400  | 0.64802600  | 1.47319900  | H  | 4.23887900  | 7.60755100  | -3.11024900 |
| C | 5.11275600  | 0.99941200  | -0.54219100 | H  | 5.67344000  | 7.38797500  | -2.10002700 |
| C | 4.69066400  | 1.29173900  | 1.56914700  | H  | 4.06432400  | 3.96687100  | -2.20718700 |
| N | 4.20267600  | 1.51670600  | 0.35985900  | H  | 3.35096000  | 7.60899800  | -0.24835900 |
| C | 0.96873900  | 5.49555800  | 3.98941100  | H  | 2.14501000  | 5.77974700  | 1.04596300  |
| N | 1.84837500  | 4.63081300  | 3.23793000  | H  | 7.46254400  | -0.18381000 | -1.42595700 |
| C | 1.34837400  | 3.61617300  | 2.46082700  | H  | 7.41220900  | -1.29586300 | -0.05473100 |
| O | 0.07925600  | 3.64725100  | 2.28288100  | H  | 4.92741700  | 1.06033400  | -1.60289000 |
| O | 2.17940700  | 2.79599600  | 1.97488600  | H  | 6.43372600  | 0.32309200  | 2.25017800  |
| C | -3.03059700 | 4.64254200  | 3.77816500  | H  | 4.21261000  | 1.58156600  | 2.49123500  |
| C | -3.53382500 | 3.30391300  | 3.31919200  | H  | -1.96512300 | 4.59522100  | 4.01752800  |
| N | -2.93002400 | 2.53525200  | 2.32115200  | H  | -5.36131700 | 2.87542800  | 4.52911600  |
| C | -4.63870500 | 2.62912500  | 3.76766900  | H  | -5.37272200 | 0.71203200  | 3.15571500  |
| C | -3.66744700 | 1.43737700  | 2.17811000  | H  | -3.48488700 | 0.62944000  | 1.48065200  |
| N | -4.70677000 | 1.46122400  | 3.03466900  | H  | -0.83776700 | 5.02829100  | -4.08862800 |

|   |             |             |             |   |             |             |             |
|---|-------------|-------------|-------------|---|-------------|-------------|-------------|
| H | -2.49164000 | 5.64350200  | -4.15944400 | H | 0.47033700  | -5.53796100 | -4.39746600 |
| H | -0.49545200 | 3.21599800  | -1.96801800 | H | 1.05961300  | -7.37810600 | -1.95069000 |
| H | -3.43180300 | 6.18797600  | -1.48405500 | H | 1.63506400  | -3.86781600 | -5.46001200 |
| H | -3.41362500 | 4.77823600  | 0.63182100  | H | 6.22891200  | -3.20522900 | -4.50689900 |
| H | 0.22711100  | 5.94325000  | 3.32570200  | H | 6.24726800  | -1.48261400 | -4.08241600 |
| H | 8.30683100  | 0.22771000  | 0.06977600  | H | 6.02407100  | -6.33560900 | 4.62481900  |
| H | -3.15785200 | 5.41348700  | 3.00872700  | H | 4.25788600  | -6.30957400 | 4.63253800  |
| H | -3.57798000 | 4.96588700  | 4.66605300  | C | -4.97750600 | -3.00434400 | 7.40810600  |
| H | 1.55803600  | 6.29651200  | 4.44327600  | C | -3.57047300 | -3.44290500 | 6.97128500  |
| H | 0.43306400  | 4.96842500  | 4.78956100  | C | -3.22017500 | -2.94947200 | 5.58519800  |
| H | 5.25714200  | 6.17952000  | -3.31868000 | C | -2.36309900 | -1.86304900 | 5.38419100  |
| H | -1.21364100 | 6.62851600  | -3.42898800 | C | -3.79854000 | -3.54112800 | 4.45162600  |
| H | 2.79776600  | 4.50007600  | 3.55342400  | C | -2.08994800 | -1.37093200 | 4.10552900  |
| C | 5.14990200  | -5.67561000 | 4.65849800  | C | -3.54013500 | -3.06688200 | 3.17099500  |
| C | 5.15788700  | -4.68978000 | 3.48310500  | C | -2.68145200 | -1.97391500 | 2.98913200  |
| C | 6.43371400  | -3.83027600 | 3.39095600  | O | -2.48477800 | -1.54198900 | 1.71285200  |
| C | 6.43856600  | -3.00089200 | 2.10068500  | H | -3.51086000 | -4.53808300 | 7.00202600  |
| C | 6.62273500  | -2.92120200 | 4.61487100  | H | -2.83192100 | -3.07371400 | 7.69212000  |
| C | 6.31783700  | -2.49874800 | -3.67737200 | H | -1.89707500 | -1.38622000 | 6.24350600  |
| C | 5.22629600  | -2.73314300 | -2.63652000 | H | -4.46451200 | -4.39210500 | 4.57588100  |
| S | 5.36911500  | -4.42687000 | -1.90370900 | H | -1.42134100 | -0.52532600 | 3.96975900  |
| C | 0.35222200  | -6.54831900 | -2.06547900 | H | -3.99025300 | -3.52890000 | 2.29826300  |
| C | 1.19058500  | -5.35606000 | -2.50882400 | H | -1.78081500 | -0.86365700 | 1.66050800  |
| O | 1.92645000  | -4.75106800 | -1.71306200 | H | -5.05920500 | -1.91233300 | 7.42422900  |
| C | -0.37081400 | -6.31336500 | -0.73686400 | H | -5.73975000 | -3.38382000 | 6.71998800  |
| C | -1.79245000 | -5.78304800 | -0.91379900 | H | -5.21518900 | -3.37642800 | 8.41012800  |
| O | -2.27572200 | -5.53516000 | -2.02232600 | C | -1.97608100 | -2.79459100 | -4.82031300 |
| N | -2.50767000 | -5.65557200 | 0.23024900  | C | -3.33702800 | -2.51967300 | -4.20806500 |
| N | 1.14276800  | -5.05373800 | -3.82268600 | O | -4.35973500 | -2.44935100 | -4.88999800 |
| C | 1.94799800  | -3.99749000 | -4.42310500 | N | -3.30302200 | -2.31289100 | -2.86255300 |
| H | 5.04647300  | -5.24848400 | 2.54542800  | C | -4.47777900 | -1.99430200 | -2.07842900 |
| H | 4.28231900  | -4.02706100 | 3.54936000  | C | -4.44661800 | -0.52550900 | -1.61415500 |
| H | 7.29126900  | -4.51790900 | 3.34787800  | O | -3.47538000 | -0.09886600 | -0.96172200 |
| H | 6.33243400  | -3.62814000 | 1.20922700  | C | -4.51274200 | -2.88839400 | -0.82023400 |
| H | 7.37533800  | -2.43736300 | 2.00697300  | O | -4.66633600 | -4.25992300 | -1.13665100 |
| H | 5.60679200  | -2.28351100 | 2.09771400  | N | -5.51431800 | 0.26764400  | -1.85549400 |
| H | 7.53322500  | -2.31787800 | 4.52041600  | C | -6.62649600 | 0.01860500  | -2.80974900 |
| H | 5.77303400  | -2.23394500 | 4.72492200  | C | -6.13443700 | 0.08746600  | -4.25731700 |
| H | 6.70716700  | -3.49064500 | 5.54445400  | C | -7.61551900 | 1.13758100  | -2.43399300 |
| H | 5.15690500  | -5.16358400 | 5.62563800  | C | -6.70583700 | 2.31890200  | -2.05819700 |
| H | 5.29191800  | -1.99108500 | -1.83505800 | C | -5.51808800 | 1.65090400  | -1.34762100 |
| H | 4.23636500  | -2.64406700 | -3.08764000 | H | -4.55592300 | 2.13026200  | -1.54880900 |
| H | 4.04852800  | -4.61154900 | -1.67532600 | H | -5.64904000 | 1.63793200  | -0.25768400 |
| H | 7.31675500  | -2.61995000 | -3.24508800 | H | -6.36655300 | 2.83754300  | -2.96041400 |
| H | 0.20510200  | -5.60493900 | -0.13106400 | H | -7.20593500 | 3.05592100  | -1.42382000 |
| H | -0.42919200 | -7.24633200 | -0.16492200 | H | -8.30413400 | 1.36632300  | -3.25095000 |
| H | -2.07420400 | -5.74288000 | 1.13512900  | H | -8.21274700 | 0.83182400  | -1.56727200 |
| H | -3.44217300 | -5.26118400 | 0.15183800  | H | -7.06858700 | -0.96228500 | -2.61401400 |
| H | -0.37287600 | -6.82813900 | -2.83366500 | H | -5.65174700 | 1.04986500  | -4.45986000 |
| H | 3.01002400  | -4.26210300 | -4.40519200 | H | -5.43762200 | -0.71891200 | -4.49101600 |
| H | 1.80604500  | -3.05559400 | -3.88698400 | H | -6.98595400 | -0.01037600 | -4.94052900 |

|   |             |             |             |   |             |             |             |
|---|-------------|-------------|-------------|---|-------------|-------------|-------------|
| H | -5.34833600 | -2.21142200 | -2.69688600 | C | 1.36712800  | -0.53644200 | 0.75967700  |
| H | -3.92296400 | -4.54353600 | -1.71219100 | C | 0.36686100  | 0.60702700  | 0.69286900  |
| H | -5.37574200 | -2.61078000 | -0.20316200 | O | -0.71573900 | 0.59970600  | 1.36944300  |
| H | -3.60487500 | -2.69340400 | -0.23534800 | H | 1.59694400  | 2.98322800  | -5.08168100 |
| H | -2.41774700 | -2.48561100 | -2.36467900 | H | 2.21348000  | 4.20923300  | -3.94960300 |
| H | -1.44999100 | -1.84556900 | -4.97336800 | H | 2.13891800  | 0.00684600  | -1.21324400 |
| H | -1.36387700 | -3.42026900 | -4.16666800 | H | 2.96373000  | -1.34192900 | -0.45495800 |
| H | -2.11960800 | -3.27324900 | -5.78997200 | H | 2.19355100  | -0.07918800 | 1.32286600  |
| C | 2.26642500  | 3.15296000  | -4.23719500 | H | 3.29841600  | 2.94478600  | -4.53273800 |
| C | 1.85073400  | 2.29241500  | -3.04326400 | H | -1.62645000 | -0.38563400 | -1.68720300 |
| O | 2.74768500  | 2.14546400  | -2.12036300 | H | 1.50287300  | -2.85663900 | -1.31091700 |
| O | 0.69763200  | 1.83315100  | -3.01022500 | O | 0.65476900  | 1.67072600  | 0.04731300  |
| N | -0.61586700 | -0.49399900 | -1.70314200 | H | -0.04928300 | 0.27744700  | -2.05847700 |
| C | -0.13326500 | -1.75857100 | -1.59460300 | C | 0.88397300  | -1.76242500 | 1.53908600  |
| O | -0.85172200 | -2.77577000 | -1.63284600 | H | 1.69134000  | -2.49909500 | 1.59902400  |
| N | 1.22480500  | -1.88092500 | -1.39827500 | H | 0.59671800  | -1.49560900 | 2.55882100  |
| C | 1.97840900  | -0.90263300 | -0.63017500 | H | 0.02986900  | -2.24415100 | 1.05870800  |

**(5S,6S)-Me<sub>2</sub>DHU-ES-II (SkDHPase)**

|   |             |             |              |    |              |             |              |
|---|-------------|-------------|--------------|----|--------------|-------------|--------------|
| C | -2.73099200 | -0.10103300 | -4.80017600  | O  | -5.23584500  | -3.65267900 | -7.51344000  |
| C | -3.70755800 | -0.14197800 | -5.92036500  | O  | -4.13407800  | -4.49207900 | -9.28626600  |
| N | -4.00406900 | 0.92469500  | -6.75672700  | Zn | -6.40400300  | -2.15658800 | -8.46989400  |
| C | -4.46963800 | -1.17284100 | -6.38771200  | Zn | -6.06839600  | -1.78038200 | -11.97971000 |
| C | -4.90932500 | 0.50923100  | -7.67941500  | N  | -7.54624300  | -5.61256800 | -12.72281000 |
| N | -5.20430600 | -0.76533700 | -7.48549900  | C  | -8.22782100  | -6.76785700 | -12.26927600 |
| C | -9.56332900 | -3.95540600 | -4.12769800  | O  | -7.97977200  | -7.85804700 | -12.77917500 |
| C | -9.08793600 | -3.29929100 | -5.38235400  | N  | -9.13371200  | -6.56986800 | -11.28896500 |
| N | -9.87175400 | -2.42603700 | -6.12469500  | C  | -9.08519700  | -5.38192500 | -10.42419000 |
| C | -7.90032600 | -3.36192700 | -6.06450700  | C  | -8.86237100  | -4.12561500 | -11.29062500 |
| C | -9.15828800 | -2.00113300 | -7.19505900  | C  | -7.75532100  | -4.34165900 | -12.29797600 |
| N | -7.95758800 | -2.55362300 | -7.18614700  | O  | -7.09985600  | -3.41076000 | -12.80086900 |
| C | -6.95819100 | 2.60919700  | -10.69330100 | H  | -1.71721500  | 0.13394300  | -5.14537000  |
| N | -7.27605700 | 1.49917200  | -9.81640500  | H  | -3.00031900  | 0.64079600  | -4.03911400  |
| C | -7.27299000 | 0.18006800  | -10.22943500 | H  | -4.53332300  | -2.18929500 | -6.03984600  |
| O | -6.79741400 | -0.04485600 | -11.39798000 | H  | -3.61850000  | 1.85532000  | -6.69330000  |
| O | -7.70552400 | -0.67570800 | -9.40484800  | H  | -5.33770300  | 1.14338200  | -8.44223600  |
| C | -5.99742500 | 1.45357700  | -14.50229300 | H  | -8.74654100  | -4.52424500 | -3.67878200  |
| C | -6.15703000 | 0.07428300  | -15.06318900 | H  | -10.39024900 | -4.64708500 | -4.31736700  |
| N | -6.20193100 | -1.09295400 | -14.29896800 | H  | -7.00698000  | -3.92512600 | -5.84477400  |
| C | -6.29043500 | -0.25050400 | -16.38932400 | H  | -10.82731300 | -2.17382500 | -5.91793500  |
| C | -6.35823300 | -2.08469600 | -15.16383700 | H  | -9.50885600  | -1.30373700 | -7.93968600  |
| N | -6.41350900 | -1.62347900 | -16.43552700 | H  | -6.74361500  | 1.64342300  | -13.72608100 |
| C | -0.67058800 | -2.26303000 | -10.70606800 | H  | -6.31649100  | 0.36401900  | -17.27529400 |
| C | -1.89926400 | -1.91533900 | -11.46966200 | H  | -6.56719700  | -2.18620900 | -17.25824300 |
| N | -1.94505400 | -1.10640900 | -12.59687800 | H  | -6.45337600  | -3.12700100 | -14.90769200 |
| C | -3.19648700 | -2.27306600 | -11.24081000 | H  | -0.93669300  | -2.95873700 | -9.90823000  |
| C | -3.23662700 | -1.00669500 | -12.99970500 | H  | 0.08583500   | -2.74902500 | -11.33327700 |
| N | -4.02063100 | -1.70189700 | -12.19175000 | H  | -3.56688700  | -2.92969400 | -10.46919700 |
| C | -2.92951900 | -4.25382000 | -7.22607700  | H  | -1.15624200  | -0.66806500 | -13.04933500 |
| C | -4.19798800 | -4.14920200 | -8.08398600  | H  | -3.55955800  | -0.44481400 | -13.86160700 |

|   |              |              |              |   |              |              |              |
|---|--------------|--------------|--------------|---|--------------|--------------|--------------|
| H | -6.04460200  | 2.38461400   | -11.24509600 | H | -10.40326700 | -10.44941600 | -15.00273600 |
| H | -2.21886200  | -4.95167500  | -7.67184700  | H | -8.76406800  | -10.73736500 | -15.53486600 |
| H | -2.46436900  | -3.26278000  | -7.17152100  | H | -9.07619500  | -12.06937400 | -11.23805900 |
| H | -10.07655200 | -5.29521400  | -9.96643100  | H | -7.68359600  | -9.95292100  | -7.54970800  |
| H | -8.52813900  | -3.30492900  | -10.65196300 | H | -7.03713800  | -8.88101900  | -8.81596600  |
| H | -9.90170000  | -3.21996700  | -3.38908000  | H | -7.51757300  | -11.57816400 | -9.79793400  |
| H | -5.01366700  | 1.59712400   | -14.03920400 | H | -10.58652100 | -11.46483300 | -10.55319200 |
| H | -6.10919600  | 2.19964900   | -15.29242600 | H | -6.15818300  | -10.36023000 | -8.37365000  |
| H | -6.79524500  | 3.50670400   | -10.09053200 | H | -7.96785400  | -8.95548500  | -4.30062000  |
| H | -7.75074700  | 2.82331300   | -11.42303900 | H | -7.34029400  | -7.30585800  | -4.13234300  |
| H | -2.69743400  | -1.07745500  | -4.31323900  | H | -16.37134700 | -5.81458100  | -7.93411000  |
| H | -3.16756100  | -4.56317400  | -6.20483800  | H | -15.77627600 | -5.69047500  | -9.59289000  |
| H | -0.20404200  | -1.38259900  | -10.24815900 | C | -12.65108500 | -2.36154800  | -18.57849700 |
| H | -7.87214400  | 1.67411100   | -9.02060500  | C | -12.12867700 | -2.14244700  | -17.14895600 |
| H | -6.90607700  | -5.76699700  | -13.50619800 | C | -11.28625300 | -3.29791000  | -16.65514800 |
| H | -9.42919800  | -7.44643800  | -10.85095800 | C | -9.89707200  | -3.31048800  | -16.82072300 |
| O | -6.08233800  | -2.78782700  | -10.26661800 | C | -11.87903000 | -4.42430700  | -16.06576300 |
| H | -5.47051400  | -3.54384800  | -10.14599800 | C | -9.12151900  | -4.39906500  | -16.42038700 |
| C | -15.72459800 | -5.23247200  | -8.59995700  | C | -11.12256300 | -5.51754000  | -15.65577300 |
| C | -14.28164200 | -5.20647800  | -8.07989500  | C | -9.73212400  | -5.51272800  | -15.83046400 |
| C | -14.13915700 | -4.65976300  | -6.64617900  | O | -9.03576200  | -6.59791900  | -15.40385300 |
| C | -12.71573900 | -4.88046500  | -6.11924200  | H | -12.97986200 | -1.99228600  | -16.47374600 |
| C | -14.53070900 | -3.17808300  | -6.54070100  | H | -11.54135300 | -1.21664800  | -17.11534600 |
| C | -8.21561400  | -7.89748400  | -4.42195300  | H | -9.41075600  | -2.44756500  | -17.27139800 |
| C | -8.60886700  | -7.58320000  | -5.86305200  | H | -12.95702600 | -4.44405100  | -15.92268300 |
| S | -10.11639700 | -8.54641900  | -6.33861600  | H | -8.04406900  | -4.40592800  | -16.56160500 |
| C | -9.67448300  | -11.16761000 | -11.08380600 | H | -11.58781500 | -6.38402100  | -15.19667000 |
| C | -8.97037200  | -10.20101000 | -10.13956700 | H | -8.07033600  | -6.44750800  | -15.47492900 |
| O | -9.43656900  | -9.07876900  | -9.88397900  | H | -11.82233600 | -2.48161700  | -19.28388100 |
| C | -10.06789100 | -10.56024200 | -12.43719200 | H | -13.26593400 | -3.26529000  | -18.63656500 |
| C | -9.00533600  | -10.75328100 | -13.51344800 | H | -13.26085500 | -1.51503800  | -18.91157700 |
| O | -7.81530700  | -10.94927100 | -13.23990600 | C | -10.13433200 | -3.69771600  | -12.05733300 |
| N | -9.45525100  | -10.71393200 | -14.78912600 | H | -10.92141700 | -3.44284400  | -11.34139800 |
| N | -7.86330400  | -10.66980900 | -9.52908600  | H | -9.93783800  | -2.81908000  | -12.67641700 |
| C | -7.14862300  | -9.92146700  | -8.50391200  | H | -10.50271200 | -4.49857900  | -12.70369300 |
| H | -13.87509200 | -6.22550000  | -8.10599900  | C | -4.78800700  | -9.59698500  | -11.86439900 |
| H | -13.65290200 | -4.60894000  | -8.75664800  | C | -4.50397700  | -9.37102900  | -13.33308700 |
| H | -14.82383100 | -5.23444300  | -6.00508100  | O | -3.47646900  | -9.76804200  | -13.87836200 |
| H | -12.43197200 | -5.93802100  | -6.13562600  | N | -5.47420000  | -8.66513500  | -13.99085900 |
| H | -12.62307200 | -4.52445400  | -5.08612700  | C | -5.41644800  | -8.44712600  | -15.42351900 |
| H | -11.98577400 | -4.33690400  | -6.73391300  | C | -5.31388000  | -6.94288400  | -15.70673600 |
| H | -14.42579700 | -2.81484400  | -5.51210300  | O | -6.25794100  | -6.17148200  | -15.39024500 |
| H | -13.89029500 | -2.55914900  | -7.18387500  | C | -6.65994000  | -9.05518600  | -16.10981000 |
| H | -15.56652400 | -3.00109400  | -6.84294700  | O | -6.74929600  | -10.44920200 | -15.88174800 |
| H | -16.15069800 | -4.22798800  | -8.68264700  | N | -4.21421100  | -6.44659000  | -16.29333300 |
| H | -8.80995500  | -6.51593000  | -5.98858000  | C | -2.97313600  | -7.16627600  | -16.70583800 |
| H | -7.79644100  | -7.85110000  | -6.54198600  | C | -2.02126900  | -7.39225700  | -15.52492800 |
| H | -9.93704300  | -8.50754700  | -7.67788000  | C | -2.41109500  | -6.21620300  | -17.77994200 |
| H | -9.02619400  | -7.66225200  | -3.72453500  | C | -2.76228000  | -4.81636700  | -17.25158600 |
| H | -10.23273800 | -9.48325300  | -12.32352900 | C | -4.14598200  | -5.00581600  | -16.61204400 |
| H | -11.01216400 | -10.99439900 | -12.78155400 | H | -4.29442200  | -4.40754600  | -15.70912600 |

H -4.95966200 -4.76107900 -17.30529900  
H -2.03510700 -4.49901500 -16.49795600  
H -2.77454000 -4.05573400 -18.03619100  
H -1.33939200 -6.36318800 -17.93249000  
H -2.91470400 -6.39617900 -18.73624400  
H -3.24364500 -8.12766400 -17.14833300  
H -1.77036200 -6.44643500 -15.03350300  
H -2.45088500 -8.07785100 -14.79240900  
H -1.09211200 -7.84148500 -15.89115400  
H -4.53329800 -8.98203500 -15.77093700  
H -6.80848300 -10.60649800 -14.91532100

H -6.58228700 -8.91519200 -17.19397200  
H -7.56337400 -8.53612500 -15.76788400  
H -6.33987500 -8.41912300 -13.50905500  
H -4.69546000 -8.65396000 -11.31399700  
H -5.80348200 -9.97825300 -11.72238500  
H -4.05850300 -10.30674500 -11.4742020  
C -8.04542000 -5.56088700 -9.31176900  
H -8.11269800 -4.74892700 -8.58577400  
H -8.22999700 -6.50545600 -8.79241500  
H -7.02326300 -5.57316400 -9.70112200

**(5S,6S)-Me<sub>2</sub>DHU-TS1-II (SkDHPase)**

C -2.73098900 -0.10103100 -4.80017200  
C -3.54697400 -0.18993700 -6.04184400  
N -3.50019200 0.70725400 -7.10085900  
C -4.45133100 -1.13497900 -6.42939900  
C -4.35484600 0.27824200 -8.06562900  
N -4.94277100 -0.84327100 -7.68815800  
C -9.56332600 -3.95540600 -4.12769900  
C -9.02407700 -3.17460700 -5.27750900  
N -9.78604200 -2.27426200 -6.00913000  
C -7.80427800 -3.18229300 -5.90116600  
C -9.03132600 -1.78915600 -7.02350300  
N -7.82509700 -2.33046600 -6.99104800  
C -6.95819100 2.60919000 -10.69329900  
N -7.32560600 1.54310900 -9.78559700  
C -7.07309400 0.23067500 -10.06329500  
O -6.30468500 0.01463500 -11.06798600  
O -7.56595600 -0.64696900 -9.29198500  
C -5.99742500 1.45357400 -14.50229200  
C -6.27448400 0.05636900 -14.97238700  
N -6.24723700 -1.07740500 -14.15724300  
C -6.57332100 -0.33236000 -16.25278500  
C -6.51122400 -2.11269800 -14.94706900  
N -6.71493300 -1.70402400 -16.21701900  
C -0.67059400 -2.26302900 -10.70607000  
C -1.91384300 -1.97154800 -11.46552200  
N -1.97792500 -1.16358700 -12.59135800  
C -3.20229300 -2.36623500 -11.23785900  
C -3.26935900 -1.09206300 -12.99351400  
N -4.03616300 -1.80882500 -12.18703100  
C -2.92951700 -4.25381900 -7.22607400  
C -4.21485600 -4.14987300 -8.05035800  
O -5.23794000 -3.63930000 -7.46514300  
O -4.18985500 -4.50694700 -9.25099400  
Zn -6.37047500 -2.16998400 -8.44857100  
Zn -6.05398500 -1.66331600 -12.04000800  
H -1.65565100 -0.13492000 -5.01036500  
H -2.92897100 0.81806900 -4.23650000

H -4.75194000 -2.03109600 -5.91538000  
H -2.93096800 1.53935900 -7.15082700  
H -4.51603900 0.78959400 -9.00206200  
H -8.75939500 -4.53081800 -3.66428700  
H -10.33890900 -4.65892200 -4.44642100  
H -6.92497600 -3.76630000 -5.67985400  
H -10.75126300 -2.03786800 -5.82939800  
H -9.36440500 -1.07281300 -7.75752300  
H -6.67787400 1.74348500 -13.69650300  
H -6.69721600 0.23858700 -17.15919300  
H -6.98824900 -2.30248500 -16.98258700  
H -6.53899500 -3.15059400 -14.64710700  
H -0.90247800 -2.94996200 -9.89007400  
H 0.09718300 -2.73568800 -11.32954400  
H -3.55984000 -3.04440300 -10.47632300  
H -1.19705300 -0.71508200 -13.04774200  
H -3.60671100 -0.53488800 -13.85277200  
H -5.93522100 2.46220600 -11.04143000  
H -2.21822500 -4.93000500 -7.70234900  
H -2.48356500 -3.25542900 -7.15239000  
H -9.99507300 -3.30688400 -3.35702400  
H -4.97809100 1.55892000 -14.11311200  
H -6.11704600 2.15856300 -15.32788200  
H -7.01782700 3.56468900 -10.16603100  
H -7.61276400 2.66157000 -11.57338000  
H -2.96941300 -0.94592300 -4.15157400  
H -3.14342100 -4.59034900 -6.20820500  
H -0.23140100 -1.35692900 -10.27188800  
H -8.00731400 1.71606100 -9.06338300  
C -15.72462800 -5.23248900 -8.59995600  
C -14.28161200 -5.20645800 -8.07989900  
C -14.13572000 -4.64946000 -6.65048500  
C -12.71194600 -4.86863800 -6.12218300  
C -14.52420000 -3.16642700 -6.55440200  
C -8.21561900 -7.89747500 -4.42193800  
C -8.79908000 -7.72906000 -5.81831000  
S -10.18082800 -8.92160700 -6.11416100

|   |              |              |              |   |              |             |              |
|---|--------------|--------------|--------------|---|--------------|-------------|--------------|
| C | -9.10608600  | -10.05858700 | -11.76640400 | H | -10.19747600 | -6.09449500 | -15.57655500 |
| C | -8.80047200  | -9.70541700  | -10.31891100 | H | -8.39674400  | -3.77510300 | -13.61640400 |
| O | -9.46018500  | -8.87339500  | -9.67401800  | H | -12.00621400 | -1.49841700 | -18.38337500 |
| C | -10.56059900 | -9.80886500  | -12.15774300 | H | -12.04703000 | -3.11671800 | -19.09167700 |
| C | -10.71155000 | -9.55263900  | -13.65561200 | H | -13.44515700 | -2.04133600 | -19.26218100 |
| O | -9.83456700  | -9.02397500  | -14.33471500 | N | -7.23710200  | -5.03489500 | -11.68876800 |
| N | -11.90783600 | -9.90844800  | -14.19021900 | C | -7.92574500  | -6.22485200 | -11.45734500 |
| N | -7.71901700  | -10.31596300 | -9.78643100  | O | -7.57029300  | -7.27392800 | -12.00461800 |
| C | -7.14862100  | -9.92147200  | -8.50393200  | N | -9.00999600  | -6.15528900 | -10.64988500 |
| H | -13.87827400 | -6.22696900  | -8.09851000  | C | -9.07525500  | -5.09077500 | -9.64808700  |
| H | -13.65168900 | -4.61643000  | -8.76209300  | C | -8.88614200  | -3.73913600 | -10.36967100 |
| H | -14.81956400 | -5.21869600  | -6.00374000  | C | -7.68284700  | -3.76898200 | -11.32284700 |
| H | -12.43070500 | -5.92715500  | -6.13809400  | O | -7.60069200  | -2.86206400 | -12.25719800 |
| H | -12.62081000 | -4.51369000  | -5.08870800  | H | -10.09384100 | -5.10457200 | -9.24516200  |
| H | -11.98171000 | -4.32238900  | -6.73529700  | H | -8.69015100  | -2.95611600 | -9.63776700  |
| H | -14.41661800 | -2.79609600  | -5.52857200  | H | -6.60487900  | -5.06505800 | -12.49937800 |
| H | -13.88429500 | -2.55339000  | -7.20353100  | H | -9.34301800  | -7.07775900 | -10.36305700 |
| H | -15.56042900 | -2.99047300  | -6.85559700  | O | -6.27707200  | -3.07664900 | -10.24952500 |
| H | -16.14809000 | -4.22753000  | -8.68979400  | H | -5.60597800  | -3.78635700 | -10.07308100 |
| H | -9.17192500  | -6.71153700  | -5.95853600  | C | -10.15923600 | -3.35814500 | -11.14827900 |
| H | -8.02720400  | -7.90998800  | -6.56795700  | H | -10.99796700 | -3.26251700 | -10.45109900 |
| H | -10.13838400 | -8.86671500  | -7.46444800  | H | -10.02868400 | -2.40589600 | -11.66311200 |
| H | -8.97229000  | -7.73831500  | -3.64654300  | H | -10.41877100 | -4.12041200 | -11.88655200 |
| H | -10.91024900 | -8.90887900  | -11.63785300 | C | -4.82810800  | -9.59760700 | -11.88554700 |
| H | -11.21291200 | -10.62797800 | -11.83582600 | C | -4.67096900  | -9.08758800 | -13.31169200 |
| H | -12.63636200 | -10.34208500 | -13.64722800 | O | -3.87266700  | -9.61149800 | -14.08846500 |
| H | -12.07212400 | -9.71722700  | -15.16723800 | N | -5.44133500  | -8.01174900 | -13.61236100 |
| H | -8.47838500  | -9.39913700  | -12.37573600 | C | -5.44302500  | -7.36154400 | -14.90715300 |
| H | -7.88273200  | -10.04866300 | -7.70498000  | C | -4.87390900  | -5.94343700 | -14.75264400 |
| H | -6.81897900  | -8.87756200  | -8.52445900  | O | -5.43420700  | -5.12014500 | -13.99795200 |
| H | -7.18333000  | -10.93264600 | -10.37855800 | C | -6.87097600  | -7.27096500 | -15.49968800 |
| H | -8.80821100  | -11.09088200 | -11.98080900 | O | -7.38015400  | -8.55409200 | -15.77136200 |
| H | -6.28837600  | -10.55919100 | -8.29581700  | N | -3.78523900  | -5.58302100 | -15.46168700 |
| H | -7.80193600  | -8.90009900  | -4.28218600  | C | -2.94969200  | -6.43795800 | -16.34752400 |
| H | -7.41043800  | -7.17198300  | -4.26106400  | C | -2.06137000  | -7.39288100 | -15.54607600 |
| H | -16.37310400 | -5.80868900  | -7.93060600  | C | -2.15707100  | -5.38168800 | -17.14213400 |
| H | -15.77615100 | -5.69651100  | -9.58998200  | C | -1.93109900  | -4.25281300 | -16.12355300 |
| C | -12.65108500 | -2.36154800  | -18.57849700 | C | -3.24650000  | -4.21726200 | -15.33253300 |
| C | -13.22478500 | -2.92119000  | -17.26872600 | H | -3.12337500  | -3.95774000 | -14.27773200 |
| C | -12.10837500 | -3.35801000  | -16.35268600 | H | -3.96006300  | -3.50154300 | -15.75977200 |
| C | -11.41110600 | -2.41588800  | -15.58880700 | H | -1.09525900  | -4.50121700 | -15.46184000 |
| C | -11.65646500 | -4.68404300  | -16.33616700 | H | -1.70530100  | -3.29215400 | -16.59465000 |
| C | -10.28226000 | -2.77110600  | -14.85518400 | H | -1.22886900  | -5.78940200 | -17.54961000 |
| C | -10.53661300 | -5.06338800  | -15.60203200 | H | -2.76003600  | -5.01512800 | -17.98086400 |
| C | -9.83596200  | -4.09821300  | -14.87123400 | H | -3.59807600  | -7.01056200 | -17.01654400 |
| O | -8.72110000  | -4.49474800  | -14.19584000 | H | -1.41952900  | -6.84051600 | -14.85098300 |
| H | -13.88820800 | -3.76582700  | -17.48769600 | H | -2.64394200  | -8.12532400 | -14.98426200 |
| H | -13.84107200 | -2.15544900  | -16.78185900 | H | -1.41206500  | -7.94763200 | -16.23277900 |
| H | -11.74797400 | -1.38151900  | -15.57857400 | H | -4.83618300  | -7.97851000 | -15.56839800 |
| H | -12.18886600 | -5.43387500  | -16.91673300 | H | -8.11826200  | -8.73396200 | -15.16842900 |
| H | -9.74529700  | -2.02936100  | -14.26991900 | H | -6.80585500  | -6.69956500 | -16.43970200 |



H -7.50781800 -6.69892900 -14.81768000  
H -6.12499600 -7.67290000 -12.93520500  
H -3.91184400 -9.37177400 -11.33099700  
H -5.67767000 -9.15386300 -11.36277300  
H -4.92510000 -10.68666900 -11.91746100

C -8.09765200 -5.39996900 -8.51221300  
H -7.05593900 -5.28691900 -8.81913800  
H -8.27036900 -4.75816800 -7.65061900  
H -8.25023800 -6.43486700 -8.20074800

**(5S,6S)-Me<sub>2</sub>DHU-INT1-II (SkDHPase)**

C -2.73099300 -0.10103300 -4.80017700  
C -3.52663000 -0.19653400 -6.05323700  
N -3.42617800 0.66050700 -7.14132900  
C -4.46002900 -1.11851300 -6.42470300  
C -4.27997500 0.23177900 -8.10692200  
N -4.91728800 -0.85248700 -7.70154700  
C -9.56332400 -3.95540700 -4.12769400  
C -9.02680700 -3.16068100 -5.26685800  
N -9.79321600 -2.26915700 -6.00430100  
C -7.80086800 -3.15148700 -5.87648900  
C -9.03547700 -1.77227400 -7.00957500  
N -7.82211500 -2.29682100 -6.96287300  
C -6.95819100 2.60919600 -10.69330100  
N -7.30217400 1.50317800 -9.82435700  
C -6.99737100 0.20539300 -10.11443100  
O -6.20640700 0.01672400 -11.10584700  
O -7.47553400 -0.69213000 -9.35233400  
C -5.99742500 1.45357800 -14.50229300  
C -6.29506400 0.09053800 -15.04601400  
N -6.26447600 -1.06887700 -14.27351600  
C -6.62408600 -0.25539400 -16.33005000  
C -6.55984000 -2.08224100 -15.08332000  
N -6.78147700 -1.62741600 -16.33185100  
C -0.67058800 -2.26303000 -10.70606800  
C -1.89944600 -1.94714800 -11.48310900  
N -1.91374800 -1.16968400 -12.63162100  
C -3.20712300 -2.28996000 -11.27115600  
C -3.19277300 -1.06590700 -13.06359000  
N -4.00121200 -1.73101300 -12.25378800  
C -2.92951900 -4.25382000 -7.22607700  
C -4.21111900 -4.13214300 -8.04958900  
O -5.23135100 -3.62081400 -7.46208200  
O -4.19141500 -4.47893500 -9.25561300  
Zn -6.38021500 -2.16239900 -8.40794400  
Zn -6.02045000 -1.56148700 -12.27075500  
H -1.65456600 -0.18959100 -4.98755700  
H -2.89755200 0.84471200 -4.27157600  
H -4.80143900 -1.98249100 -5.88224000  
H -2.82400100 1.46789800 -7.20888200  
H -4.40383000 0.71356100 -9.06464300  
H -8.75743600 -4.53289200 -3.67043000  
H -10.33557600 -4.65857500 -4.45499800  
H -6.91894100 -3.72898200 -5.64897500

H -10.76562700 -2.05209300 -5.83851400  
H -9.37500700 -1.06650600 -7.75108100  
H -6.65429700 1.69456900 -13.66168400  
H -6.75921200 0.34289700 -17.21680400  
H -7.08530600 -2.19715000 -17.10801800  
H -6.61495600 -3.12567900 -14.80147800  
H -0.92916400 -2.92613300 -9.87848200  
H 0.08388100 -2.77285300 -11.31593200  
H -3.60389300 -2.93917200 -10.50400300  
H -1.10769200 -0.76519900 -13.08545500  
H -3.49034000 -0.52364400 -13.94730300  
H -5.94167000 2.47971200 -11.06625800  
H -2.21449300 -4.91517600 -7.71691200  
H -2.48866800 -3.25609500 -7.12153600  
H -9.99883300 -3.31806200 -3.34979300  
H -4.96695900 1.53063800 -14.13663800  
H -6.13569500 2.21026000 -15.27771900  
H -7.01028700 3.54160900 -10.12565400  
H -7.63139600 2.69549100 -11.55661300  
H -3.01885500 -0.91158300 -4.12827200  
H -3.14932200 -4.61907500 -6.21961000  
H -0.20564800 -1.36236900 -10.28801100  
H -7.98446600 1.63886800 -9.09472700  
C -15.72461100 -5.23248300 -8.59995600  
C -14.28163200 -5.20646700 -8.07990100  
C -14.13047400 -4.62043400 -6.66274800  
C -12.71021500 -4.84794200 -6.12832100  
C -14.49756500 -3.13017800 -6.60026100  
C -8.21561800 -7.89747700 -4.42193300  
C -8.85723600 -7.78442200 -5.79781900  
S -10.14957300 -9.08182500 -6.04946500  
C -9.12985900 -9.98047800 -11.75607800  
C -8.81567500 -9.66258300 -10.30205100  
O -9.47241900 -8.84613100 -9.63556900  
C -10.59515000 -9.75288800 -12.11944800  
C -10.78274800 -9.48226400 -13.61037900  
O -9.93070800 -8.93811400 -14.30806200  
N -11.98929300 -9.84578700 -14.11875000  
N -7.73039400 -10.28642800 -9.79020300  
C -7.14862100 -9.92147200 -8.50393100  
H -13.88684900 -6.23045200 -8.07680200  
H -13.64670900 -4.63689000 -8.77440400  
H -14.82278100 -5.16535000 -6.00421700

|   |              |              |              |   |              |              |              |
|---|--------------|--------------|--------------|---|--------------|--------------|--------------|
| H | -12.44665900 | -5.91103000  | -6.11801100  | C | -7.42433800  | -3.72458500  | -11.08689100 |
| H | -12.61359800 | -4.46938800  | -5.10360700  | O | -7.40313100  | -2.85691100  | -12.13618900 |
| H | -11.97142200 | -4.33011900  | -6.75554200  | H | -10.10497600 | -5.04885700  | -9.29452500  |
| H | -14.38913400 | -2.73890300  | -5.58219800  | H | -8.64444300  | -2.95802700  | -9.51466900  |
| H | -13.84647500 | -2.54106900  | -7.26035900  | H | -6.43157600  | -5.08876800  | -12.33131100 |
| H | -15.52991500 | -2.94601000  | -6.90977500  | H | -9.34458200  | -7.02075500  | -10.40968500 |
| H | -16.14122700 | -4.22648100  | -8.70903100  | O | -6.34193800  | -3.28741400  | -10.14595500 |
| H | -9.31436900  | -6.80048800  | -5.92868300  | H | -5.63622900  | -3.98389000  | -9.97955700  |
| H | -8.09935800  | -7.90843400  | -6.57227300  | C | -9.96232500  | -3.28288800  | -11.16175900 |
| H | -10.16868500 | -9.00159200  | -7.39905700  | H | -10.85552900 | -3.19088600  | -10.53382500 |
| H | -8.95494600  | -7.79221300  | -3.62100600  | H | -9.77625600  | -2.31920400  | -11.63541200 |
| H | -10.95167900 | -8.86641900  | -11.58118100 | H | -10.17620300 | -4.01884000  | -11.93889900 |
| H | -11.22637400 | -10.58794600 | -11.79567600 | C | -4.82810800  | -9.59760800  | -11.88554600 |
| H | -12.69916800 | -10.29273900 | -13.5621800  | C | -4.65892700  | -9.04783400  | -13.29578800 |
| H | -12.17955300 | -9.64646200  | -15.08930800 | O | -3.88983500  | -9.58338600  | -14.09474900 |
| H | -8.52382900  | -9.28604100  | -12.34852500 | N | -5.37745800  | -7.92605700  | -13.55277400 |
| H | -7.87164200  | -10.07486400 | -7.69939900  | C | -5.42092200  | -7.29047300  | -14.85524500 |
| H | -6.82650300  | -8.87493400  | -8.50073000  | C | -4.83060500  | -5.87564600  | -14.75043000 |
| H | -7.19524200  | -10.88248500 | -10.40346500 | O | -5.35965900  | -5.02227600  | -14.00956400 |
| H | -8.81160400  | -10.99852600 | -12.00632200 | C | -6.87116000  | -7.19614000  | -15.38782300 |
| H | -6.28150900  | -10.55824200 | -8.32261900  | O | -7.39268500  | -8.48588900  | -15.60310400 |
| H | -7.72036500  | -8.86391200  | -4.29233900  | N | -3.75273100  | -5.55179500  | -15.49793100 |
| H | -7.46364600  | -7.11103500  | -4.29217100  | C | -2.94140600  | -6.44587900  | -16.36626200 |
| H | -16.37744800 | -5.79159100  | -7.92040900  | C | -2.06137000  | -7.39288100  | -15.54607600 |
| H | -15.77838300 | -5.71460200  | -9.58110400  | C | -2.14022000  | -5.42723000  | -17.20091800 |
| C | -12.65108500 | -2.36154800  | -18.57849700 | C | -1.88825300  | -4.26984500  | -16.22159300 |
| C | -13.10460300 | -2.68013400  | -17.14529500 | C | -3.19507400  | -4.19133100  | -15.41922400 |
| C | -11.94787900 | -3.10923300  | -16.27260700 | H | -3.05762500  | -3.89952400  | -14.37451700 |
| C | -11.22937000 | -2.18167100  | -15.51165500 | H | -3.90346500  | -3.47856900  | -15.86161500 |
| C | -11.51355700 | -4.44305000  | -16.25690300 | H | -1.04940300  | -4.50969900  | -15.56037800 |
| C | -10.10840400 | -2.55842100  | -14.77087800 | H | -1.65316100  | -3.32794600  | -16.72521300 |
| C | -10.40308600 | -4.84131700  | -15.52089100 | H | -1.22189000  | -5.86135600  | -17.60354600 |
| C | -9.68666100  | -3.89457900  | -14.77588000 | H | -2.74543100  | -5.07837300  | -18.04561100 |
| O | -8.59232900  | -4.32791300  | -14.09478400 | H | -3.60550400  | -7.02702700  | -17.01211700 |
| H | -13.86411500 | -3.47080400  | -17.17361100 | H | -1.41013100  | -6.83233400  | -14.86621000 |
| H | -13.59122300 | -1.79775500  | -16.71267200 | H | -2.65121700  | -8.10585700  | -14.96723700 |
| H | -11.54907900 | -1.14178200  | -15.49678400 | H | -1.42159100  | -7.97188600  | -16.22178100 |
| H | -12.06158900 | -5.18700200  | -16.83088300 | H | -4.84847400  | -7.92328500  | -15.53238500 |
| H | -9.56684000  | -1.82565600  | -14.17918300 | H | -8.17096500  | -8.61298300  | -15.03797900 |
| H | -10.08778800 | -5.87982500  | -15.49200100 | H | -6.84247800  | -6.64189000  | -16.34102600 |
| H | -8.26544600  | -3.67094400  | -13.43283900 | H | -7.47206600  | -6.60792000  | -14.68816400 |
| H | -11.91385800 | -1.55160900  | -18.58289700 | H | -6.08254400  | -7.61406300  | -12.87969400 |
| H | -12.18451100 | -3.23580500  | -19.04402000 | H | -3.89941300  | -9.43304100  | -11.33004100 |
| H | -13.49465200 | -2.05431800  | -19.20612300 | H | -5.65487900  | -9.13391900  | -11.34356200 |
| N | -7.07189100  | -5.05950200  | -11.53188000 | H | -4.97481500  | -10.67940300 | -11.95466300 |
| C | -7.85701100  | -6.18406400  | -11.42578100 | C | -8.18679300  | -5.45644400  | -8.43452900  |
| O | -7.55380300  | -7.23803900  | -12.01072000 | H | -7.12058600  | -5.40159000  | -8.66439300  |
| N | -8.97777900  | -6.10284900  | -10.65960200 | H | -8.38357800  | -4.82222800  | -7.57014900  |
| C | -9.06173600  | -5.07083100  | -9.63104500  | H | -8.42087300  | -6.48642700  | -8.16202100  |
| C | -8.77017900  | -3.70909800  | -10.29544900 |   |              |              |              |

**(5S,6S)-Me<sub>2</sub>DHU-TS2-II (SkDHPase)**

|    |              |             |              |   |              |              |              |
|----|--------------|-------------|--------------|---|--------------|--------------|--------------|
| C  | -2.73099400  | -0.10103200 | -4.80017700  | H | -0.92173300  | -2.85285900  | -9.82257000  |
| C  | -3.53069400  | -0.22031000 | -6.05471600  | H | 0.03075100   | -2.85279300  | -11.30711900 |
| N  | -3.31019100  | 0.51187400  | -7.21557500  | H | -3.61519200  | -2.80165700  | -10.35816800 |
| C  | -4.56874600  | -1.05084800 | -6.36655600  | H | -1.14832200  | -0.89033800  | -13.15758900 |
| C  | -4.19470700  | 0.10252300  | -8.16107200  | H | -3.55615000  | -0.62411400  | -13.94535100 |
| N  | -4.96822500  | -0.85376900 | -7.67629400  | H | -5.92067300  | 2.42127500   | -10.96953700 |
| C  | -9.56332700  | -3.95540800 | -4.12769200  | H | -2.27652300  | -4.98247400  | -7.70799000  |
| C  | -9.02656400  | -3.11664300 | -5.22983900  | H | -2.44669600  | -3.27031000  | -7.24699900  |
| N  | -9.80016700  | -2.22414700 | -5.95533600  | H | -10.10894100 | -3.36453400  | -3.38431600  |
| C  | -7.79873800  | -3.08557000 | -5.83257700  | H | -4.99329300  | 1.52523600   | -14.06890500 |
| C  | -9.04722700  | -1.70755900 | -6.95182400  | H | -6.05637700  | 2.15895400   | -15.33414100 |
| N  | -7.82722700  | -2.21995900 | -6.90866300  | H | -7.01424200  | 3.56126100   | -10.15886000 |
| C  | -6.95819100  | 2.60919800  | -10.69330100 | H | -7.54669100  | 2.70253300   | -11.61604100 |
| N  | -7.42876500  | 1.54953400  | -9.83650100  | H | -3.12182000  | -0.79637900  | -4.05516100  |
| C  | -7.08865100  | 0.24759700  | -10.02205500 | H | -3.08845400  | -4.51936400  | -6.17910700  |
| O  | -6.19208700  | 0.00260500  | -10.90756000 | H | -0.14324500  | -1.36109800  | -10.37338400 |
| O  | -7.64439300  | -0.61045300 | -9.26723300  | H | -8.17086400  | 1.72495000   | -9.17751000  |
| C  | -5.99742500  | 1.45357700  | -14.50229300 | C | -15.72462900 | -5.23248500  | -8.59995900  |
| C  | -6.30357400  | 0.06617700  | -14.97602200 | C | -14.28161300 | -5.20646500  | -8.07989900  |
| N  | -6.29873000  | -1.05733400 | -14.14971200 | C | -14.04585400 | -4.06027800  | -7.07110000  |
| C  | -6.62391600  | -0.33220500 | -16.24718500 | C | -12.78702900 | -4.28098000  | -6.22244500  |
| C  | -6.60012400  | -2.10014900 | -14.91906400 | C | -13.99501900 | -2.68670200  | -7.75761300  |
| N  | -6.80156700  | -1.70000000 | -16.18956500 | C | -8.21561800  | -7.89747700  | -4.42193200  |
| C  | -0.67058800  | -2.26303000 | -10.70606900 | C | -8.91910100  | -7.90889800  | -5.77307500  |
| C  | -1.91488500  | -1.94051200 | -11.45426400 | S | -10.08646200 | -9.33256100  | -5.91955500  |
| N  | -1.94855500  | -1.23638700 | -12.64841300 | C | -9.17132400  | -9.91109000  | -11.72635800 |
| C  | -3.22423500  | -2.21910700 | -11.17485400 | C | -8.84476700  | -9.64098100  | -10.26528500 |
| C  | -3.24064200  | -1.11674000 | -13.03929800 | O | -9.50252100  | -8.85831300  | -9.56104300  |
| N  | -4.03775900  | -1.69985400 | -12.16007900 | C | -10.63316900 | -9.64494100  | -12.07574200 |
| C  | -2.92951600  | -4.25382200 | -7.22607700  | C | -10.82216900 | -9.31740800  | -13.55477600 |
| C  | -4.25607900  | -4.13342800 | -7.95017600  | O | -9.95976000  | -8.77265400  | -14.23918200 |
| O  | -5.23206600  | -3.60335400 | -7.37035400  | N | -12.04064500 | -9.63166400  | -14.06771000 |
| O  | -4.27979200  | -4.52450700 | -9.17971500  | N | -7.74403600  | -10.26654200 | -9.78894600  |
| Zn | -6.48336900  | -2.06972000 | -8.43220100  | C | -7.14862200  | -9.92147200  | -8.50393200  |
| Zn | -6.06598500  | -1.56058500 | -12.11837200 | H | -14.06112700 | -6.16445400  | -7.59238000  |
| H  | -1.67475300  | -0.34394600 | -4.96352400  | H | -13.57466400 | -5.11373700  | -8.91585700  |
| H  | -2.77827100  | 0.90683800  | -4.37237200  | H | -14.90237400 | -4.05858000  | -6.38084400  |
| H  | -5.03000200  | -1.80005600 | -5.74761200  | H | -12.82309800 | -5.23726500  | -5.68991400  |
| H  | -2.61718100  | 1.23558000  | -7.33815800  | H | -12.68320600 | -3.48908000  | -5.46841300  |
| H  | -4.25086500  | 0.50168000  | -9.16280300  | H | -11.88497900 | -4.28384600  | -6.84827100  |
| H  | -8.74383500  | -4.46154100 | -3.61298700  | H | -13.89438100 | -1.87871300  | -7.02296700  |
| H  | -10.24341000 | -4.72679200 | -4.50777400  | H | -13.14122000 | -2.62733300  | -8.44523500  |
| H  | -6.91413000  | -3.65877500 | -5.60598500  | H | -14.89867700 | -2.48327500  | -8.33863000  |
| H  | -10.78024400 | -2.03485500 | -5.80101100  | H | -15.98651500 | -4.31274400  | -9.13244800  |
| H  | -9.39131900  | -0.99814200 | -7.68717200  | H | -9.47506900  | -6.98014600  | -5.92594800  |
| H  | -6.70360100  | 1.77517500  | -13.73066100 | H | -8.18346000  | -7.99575300  | -6.57308400  |
| H  | -6.74111600  | 0.22839500  | -17.16078500 | H | -10.23524900 | -9.23995400  | -7.25961900  |
| H  | -7.10864300  | -2.30036600 | -16.94095500 | H | -8.92911600  | -7.82547100  | -3.59450400  |
| H  | -6.67150300  | -3.12956300 | -14.59525800 | H | -10.97151500 | -8.77243200  | -11.50381000 |

|   |              |              |              |   |              |              |              |
|---|--------------|--------------|--------------|---|--------------|--------------|--------------|
| H | -11.27864100 | -10.47950000 | -11.77993500 | O | -6.34754500  | -3.19403700  | -10.06935200 |
| H | -12.76279300 | -10.06846200 | -13.51891100 | H | -5.34908000  | -4.01455500  | -9.69540800  |
| H | -12.23407800 | -9.38526300  | -15.02673400 | C | -9.97529400  | -3.30815300  | -11.00382400 |
| H | -8.55284700  | -9.21284400  | -12.30168100 | H | -10.86790400 | -3.24824700  | -10.37003900 |
| H | -7.85690100  | -10.10338000 | -7.69253600  | H | -9.81782900  | -2.33443200  | -11.46723800 |
| H | -6.84096200  | -8.87064200  | -8.48244100  | H | -10.17258500 | -4.04111700  | -11.78807300 |
| H | -7.20086100  | -10.82261200 | -10.43212100 | C | -4.82810800  | -9.59760700  | -11.88554700 |
| H | -8.87339700  | -10.92772900 | -12.00603400 | C | -4.67374500  | -9.02627100  | -13.28884800 |
| H | -6.27019500  | -10.54992800 | -8.34891700  | O | -3.92239600  | -9.55834400  | -14.10751100 |
| H | -7.62445100  | -8.80578500  | -4.27431700  | N | -5.38421200  | -7.89423300  | -13.51720800 |
| H | -7.53822400  | -7.03846300  | -4.35995700  | C | -5.42495600  | -7.22802700  | -14.80412100 |
| H | -16.43393300 | -5.35302200  | -7.77399000  | C | -4.79437500  | -5.83317400  | -14.67331700 |
| H | -15.88127200 | -6.06442300  | -9.29388800  | O | -5.28973100  | -4.98477800  | -13.90562100 |
| C | -12.65108600 | -2.36154800  | -18.57849800 | C | -6.87736300  | -7.07702400  | -15.31730400 |
| C | -13.08961400 | -2.64247100  | -17.13168000 | O | -7.44160500  | -8.34209300  | -15.56804600 |
| C | -11.94035000 | -3.07153900  | -16.24608000 | N | -3.71680700  | -5.52149500  | -15.42872900 |
| C | -11.24940900 | -2.15250200  | -15.44972200 | C | -2.94115000  | -6.41469000  | -16.32973400 |
| C | -11.50158300 | -4.40461200  | -16.22911000 | C | -2.06136900  | -7.39288100  | -15.54607600 |
| C | -10.15512100 | -2.53562000  | -14.67155900 | C | -2.14021400  | -5.39539600  | -17.16371700 |
| C | -10.41756600 | -4.80936600  | -15.45772100 | C | -1.84245400  | -4.26250800  | -16.16869400 |
| C | -9.73040100  | -3.87121500  | -14.67328200 | C | -3.12713600  | -4.17650100  | -15.33119700 |
| O | -8.66495200  | -4.31391600  | -13.95488000 | H | -2.95550200  | -3.91440700  | -14.28342500 |
| H | -13.86259800 | -3.42087300  | -17.13663300 | H | -3.83161700  | -3.43783100  | -15.73580100 |
| H | -13.56015000 | -1.74370700  | -16.71531100 | H | -0.99128600  | -4.53045400  | -15.53433100 |
| H | -11.57215100 | -1.11354700  | -15.43228500 | H | -1.60269500  | -3.31525800  | -16.66014800 |
| H | -12.02775800 | -5.14453900  | -16.82845500 | H | -1.24030200  | -5.83832400  | -17.59724600 |
| H | -9.63837000  | -1.80836900  | -14.05154900 | H | -2.75890100  | -5.01822100  | -17.98613200 |
| H | -10.10328200 | -5.84831900  | -15.42779300 | H | -3.62933800  | -6.97215300  | -16.97104700 |
| H | -8.33915400  | -3.65908200  | -13.28545800 | H | -1.38594200  | -6.85621700  | -14.87051400 |
| H | -11.90455800 | -1.56080200  | -18.61178500 | H | -2.65374700  | -8.10415400  | -14.96755000 |
| H | -12.20185000 | -3.25134100  | -19.03156800 | H | -1.44685900  | -7.97132400  | -16.24526400 |
| H | -13.50059900 | -2.05847300  | -19.19984500 | H | -4.87860000  | -7.86055800  | -15.50276100 |
| N | -7.03847500  | -5.02360000  | -11.38528800 | H | -8.20451200  | -8.47116900  | -14.98274200 |
| C | -7.80706200  | -6.15528000  | -11.30080100 | H | -6.84096000  | -6.49638100  | -16.25447800 |
| O | -7.49106000  | -7.20498400  | -11.89168100 | H | -7.45461300  | -6.49157600  | -14.59562600 |
| N | -8.93324200  | -6.09873200  | -10.53548800 | H | -6.06792000  | -7.57639100  | -12.82322800 |
| C | -9.01854200  | -5.08266500  | -9.49305900  | H | -3.88344500  | -9.46898900  | -11.34778800 |
| C | -8.76607000  | -3.71036100  | -10.14980300 | H | -5.63084700  | -9.12142500  | -11.31874800 |
| C | -7.41317800  | -3.68085800  | -10.93982600 | H | -5.00495800  | -10.67392400 | -11.97059500 |
| O | -7.45967600  | -2.84223000  | -12.03005000 | C | -8.10414700  | -5.45752700  | -8.32211700  |
| H | -10.05475800 | -5.08728400  | -9.13364000  | H | -7.04935500  | -5.38101400  | -8.59207200  |
| H | -8.66446200  | -2.96391200  | -9.36177500  | H | -8.28286900  | -4.82815800  | -7.45014900  |
| H | -6.38192600  | -5.04152900  | -12.16895100 | H | -8.30857300  | -6.49215100  | -8.04305200  |
| H | -9.29301200  | -7.02225800  | -10.29917500 |   |              |              |              |

**(5S,6S)-Me<sub>2</sub>DHU-INT2-II (SkDHPase)**

|   |             |             |             |   |             |             |             |
|---|-------------|-------------|-------------|---|-------------|-------------|-------------|
| C | -2.73099300 | -0.10103300 | -4.80017700 | C | -4.19621100 | 0.03046800  | -8.16487900 |
| C | -3.53345600 | -0.25238400 | -6.05156100 | N | -4.97479900 | -0.91267500 | -7.66080200 |
| N | -3.31026700 | 0.45404600  | -7.22789000 | C | -9.56333000 | -3.95540900 | -4.12770000 |
| C | -4.57615000 | -1.08503400 | -6.34645300 | C | -9.03843700 | -3.10475700 | -5.22327000 |

|    |              |             |              |   |              |              |              |
|----|--------------|-------------|--------------|---|--------------|--------------|--------------|
| N  | -9.81171000  | -2.20117700 | -5.93515100  | H | -6.04312500  | 2.14652200   | -15.34534900 |
| C  | -7.81316400  | -3.07176800 | -5.82832900  | H | -7.01256900  | 3.56302300   | -10.16152500 |
| C  | -9.05882000  | -1.67673500 | -6.92826700  | H | -7.52449200  | 2.71023300   | -11.62907900 |
| N  | -7.84082800  | -2.19554500 | -6.89518300  | H | -3.12040800  | -0.77654500  | -4.03637400  |
| C  | -6.95819100  | 2.60919700  | -10.69330100 | H | -3.04074300  | -4.56029200  | -6.18470400  |
| N  | -7.46155700  | 1.55701800  | -9.84824500  | H | -0.10640700  | -1.36576300  | -10.42515100 |
| C  | -7.10122300  | 0.25748800  | -9.99880100  | H | -8.22476300  | 1.73697200   | -9.21509800  |
| O  | -6.16979600  | 0.00238200  | -10.84560800 | C | -15.72461100 | -5.23247900  | -8.59995800  |
| O  | -7.67624000  | -0.59279200 | -9.24981500  | C | -14.28162700 | -5.20646900  | -8.07989400  |
| C  | -5.99742500  | 1.45357800  | -14.50229300 | C | -14.09119700 | -4.38074100  | -6.79229900  |
| C  | -6.30767400  | 0.06104400  | -14.95810700 | C | -12.69331100 | -4.60727800  | -6.20165000  |
| N  | -6.30920000  | -1.05240000 | -14.11760400 | C | -14.34475100 | -2.88200600  | -7.01189600  |
| C  | -6.62400600  | -0.35265000 | -16.22531000 | C | -8.21561800  | -7.89747700  | -4.42193300  |
| C  | -6.60992700  | -2.10402000 | -14.87538500 | C | -8.96802500  | -7.95755400  | -5.74575700  |
| N  | -6.80528800  | -1.71917400 | -16.15132500 | S | -10.07878200 | -9.43081900  | -5.83037100  |
| C  | -0.67058800  | -2.26303000 | -10.70606800 | C | -9.18656000  | -9.89082100  | -11.71497000 |
| C  | -1.91423300  | -1.93386100 | -11.45152700 | C | -8.85534900  | -9.63892600  | -10.25173900 |
| N  | -1.94350500  | -1.28721900 | -12.67788400 | O | -9.51531000  | -8.87195800  | -9.53317600  |
| C  | -3.22694500  | -2.16128500 | -11.14443200 | C | -10.65004400 | -9.62250600  | -12.05442500 |
| C  | -3.23671800  | -1.15108100 | -13.06009000 | C | -10.84831400 | -9.27247300  | -13.52704800 |
| N  | -4.03748900  | -1.66948500 | -12.14486000 | O | -9.98378300  | -8.73794900  | -14.21673500 |
| C  | -2.92951900  | -4.25382000 | -7.22607700  | N | -12.07966100 | -9.55506100  | -14.02829800 |
| C  | -4.28691400  | -4.12694900 | -7.88049100  | N | -7.74662800  | -10.26152700 | -9.78870300  |
| O  | -5.26256900  | -3.69116200 | -7.25238800  | C | -7.14862100  | -9.92147200  | -8.50393100  |
| O  | -4.32707800  | -4.42341800 | -9.15244100  | H | -13.95624700 | -6.23655700  | -7.88540200  |
| Zn | -6.52317800  | -2.06138000 | -8.44436200  | H | -13.61145100 | -4.81713700  | -8.85996500  |
| Zn | -6.06266400  | -1.54492200 | -12.08705100 | H | -14.82416600 | -4.74252200  | -6.05612600  |
| H  | -1.67520400  | -0.34781500 | -4.95951200  | H | -12.51009900 | -5.66775300  | -5.99775700  |
| H  | -2.77828700  | 0.91796600  | -4.39998200  | H | -12.57519500 | -4.06169800  | -5.25706900  |
| H  | -5.04390500  | -1.81721900 | -5.71182600  | H | -11.91549800 | -4.26409000  | -6.89684900  |
| H  | -2.61559500  | 1.17372400  | -7.36460600  | H | -14.21718000 | -2.31895000  | -6.07964400  |
| H  | -4.25518200  | 0.41140900  | -9.17379500  | H | -13.64514300 | -2.47332500  | -7.75306700  |
| H  | -8.74711300  | -4.52764200 | -3.68211400  | H | -15.35767000 | -2.68343500  | -7.37234500  |
| H  | -10.30993200 | -4.66825600 | -4.49283800  | H | -16.07628900 | -4.23766700  | -8.89040900  |
| H  | -6.93227600  | -3.65242200 | -5.60880700  | H | -9.56820100  | -7.05506600  | -5.88968300  |
| H  | -10.78792400 | -2.00162600 | -5.77011700  | H | -8.26120000  | -8.02709100  | -6.57242700  |
| H  | -9.40321400  | -0.96014500 | -7.65637000  | H | -10.28101500 | -9.36304800  | -7.16440700  |
| H  | -6.70969300  | 1.79236000  | -13.74350200 | H | -8.90018400  | -7.83674800  | -3.56955600  |
| H  | -6.73659300  | 0.19691700  | -17.14616600 | H | -10.98851100 | -8.76084200  | -11.46623600 |
| H  | -7.11242300  | -2.32810500 | -16.89576800 | H | -11.29253200 | -10.46341000 | -11.7700130  |
| H  | -6.68366500  | -3.12958900 | -14.54008200 | H | -12.80505400 | -9.97988200  | -13.47439200 |
| H  | -0.92744900  | -2.80013900 | -9.79112600  | H | -12.28042700 | -9.29101600  | -14.98105000 |
| H  | 0.00008000   | -2.90598300 | -11.28727000 | H | -8.57073200  | -9.18261100  | -12.28113300 |
| H  | -3.62896100  | -2.68812100 | -10.29669400 | H | -7.85607900  | -10.10611900 | -7.69253400  |
| H  | -1.14060000  | -0.98756200 | -13.21168100 | H | -6.84035100  | -8.87075400  | -8.47755600  |
| H  | -3.55030000  | -0.69483100 | -13.98567900 | H | -7.19747200  | -10.79813700 | -10.44324500 |
| H  | -5.91775100  | 2.40570500  | -10.94567400 | H | -8.88713700  | -10.90255500 | -12.01028600 |
| H  | -2.28855200  | -4.95393800 | -7.76353300  | H | -6.27083700  | -10.55161600 | -8.35171200  |
| H  | -2.46071100  | -3.26336600 | -7.23311800  | H | -7.58597000  | -8.78090000  | -4.28213700  |
| H  | -10.02933000 | -3.36633700 | -3.32942300  | H | -7.56861300  | -7.01341000  | -4.39999400  |
| H  | -4.99736500  | 1.52449700  | -14.05954900 | H | -16.41038800 | -5.61903800  | -7.83775400  |

|   |              |             |              |   |              |              |              |
|---|--------------|-------------|--------------|---|--------------|--------------|--------------|
| H | -15.81158200 | -5.87734300 | -9.48001200  | C | -4.67745900  | -9.01612700  | -13.28497100 |
| C | -12.65108500 | -2.36154800 | -18.57849700 | O | -3.93351600  | -9.54715500  | -14.11125000 |
| C | -13.05695800 | -2.54851300 | -17.10657300 | N | -5.38155800  | -7.87788900  | -13.50131000 |
| C | -11.90843000 | -2.98395200 | -16.22123200 | C | -5.42945300  | -7.20853400  | -14.78669100 |
| C | -11.21978400 | -2.07412300 | -15.41254700 | C | -4.78754200  | -5.81861500  | -14.66003400 |
| C | -11.47914100 | -4.32066500 | -16.20304000 | O | -5.27280000  | -4.96562200  | -13.89161800 |
| C | -10.13958300 | -2.46895400 | -14.61933100 | C | -6.88606300  | -7.04729700  | -15.28421000 |
| C | -10.40907000 | -4.73650000 | -15.41841800 | O | -7.45803800  | -8.30925300  | -15.53227800 |
| C | -9.72539800  | -3.80772400 | -14.61885600 | N | -3.71008400  | -5.51605500  | -15.42055300 |
| O | -8.67491000  | -4.26519800 | -13.88771400 | C | -2.94440500  | -6.41395600  | -16.32525400 |
| H | -13.86413800 | -3.28987700 | -17.05194100 | C | -2.06137000  | -7.39288100  | -15.54607600 |
| H | -13.47695200 | -1.60999100 | -16.72562800 | C | -2.14714500  | -5.39928500  | -17.16817200 |
| H | -11.53452700 | -1.03275900 | -15.39447000 | C | -1.83584000  | -4.26626800  | -16.17750000 |
| H | -12.00336300 | -5.05534200 | -16.81053700 | C | -3.11226300  | -4.17463600  | -15.32771800 |
| H | -9.62666200  | -1.74750400 | -13.98938400 | H | -2.92907600  | -3.91416500  | -14.28140900 |
| H | -10.10356600 | -5.77809800 | -15.38847800 | H | -3.81687200  | -3.43178700  | -15.72457000 |
| H | -8.34451500  | -3.62030200 | -13.21001700 | H | -0.97945100  | -4.53661200  | -15.55118500 |
| H | -11.87421400 | -1.59567100 | -18.67603800 | H | -1.59734300  | -3.32057100  | -16.67263100 |
| H | -12.25305100 | -3.29143500 | -18.99767800 | H | -1.25295000  | -5.84614300  | -17.60944500 |
| H | -13.50701000 | -2.05557600 | -19.18934600 | H | -2.77200400  | -5.02078900  | -17.98528700 |
| N | -7.02908700  | -5.02366500 | -11.33722700 | H | -3.63911000  | -6.97115300  | -16.95963300 |
| C | -7.79712600  | -6.15262000 | -11.26516100 | H | -1.37992200  | -6.85689200  | -14.87602900 |
| O | -7.48621400  | -7.19831200 | -11.86974700 | H | -2.65282300  | -8.10107800  | -14.96274400 |
| N | -8.92171700  | -6.10474200 | -10.49534300 | H | -1.45338400  | -7.97452600  | -16.24831300 |
| C | -9.00782500  | -5.09940500 | -9.44281600  | H | -4.89454600  | -7.84367000  | -15.49196500 |
| C | -8.74940700  | -3.72049100 | -10.08257000 | H | -8.22224200  | -8.43384300  | -14.94757600 |
| C | -7.38242600  | -3.67915700 | -10.85298900 | H | -6.85635000  | -6.46357100  | -16.21989200 |
| O | -7.43514900  | -2.82956100 | -11.94428900 | H | -7.45254200  | -6.46158700  | -14.55415700 |
| H | -8.66152700  | -2.98482400 | -9.28287800  | H | -6.06424100  | -7.56257100  | -12.80398200 |
| H | -6.37067600  | -5.03172400 | -12.11800900 | H | -3.87661700  | -9.48994200  | -11.35530600 |
| H | -9.28336200  | -7.02876700 | -10.26594400 | H | -5.61842100  | -9.11374300  | -11.30779000 |
| O | -6.32104500  | -3.25111100 | -9.97979100  | H | -5.02329400  | -10.67012100 | -11.97886100 |
| H | -5.24923500  | -4.08384800 | -9.57682100  | C | -8.09925000  | -5.48984900  | -8.27256500  |
| C | -9.95357800  | -3.31130800 | -10.94047100 | H | -7.04450600  | -5.41819200  | -8.54245600  |
| H | -10.85059200 | -3.25916700 | -10.31207500 | H | -8.27267400  | -4.86388200  | -7.39693100  |
| H | -9.79447200  | -2.33237800 | -11.39241100 | H | -8.31486800  | -6.52433900  | -8.00155100  |
| H | -10.14478400 | -4.03671900 | -11.73297000 | H | -10.04526200 | -5.10562300  | -9.08653800  |
| C | -4.82810800  | -9.59760800 | -11.88554600 |   |              |              |              |

**(5S,6S)-Me<sub>2</sub>DHU-TS3-II (SkDHPase)**

|   |             |             |             |   |             |             |              |
|---|-------------|-------------|-------------|---|-------------|-------------|--------------|
| C | -2.73099300 | -0.10103300 | -4.80017700 | C | -9.05321700 | -1.53579000 | -6.79723500  |
| C | -3.54579400 | -0.22846000 | -6.03992100 | N | -7.84888000 | -2.09049600 | -6.82001800  |
| N | -3.37773500 | 0.54459100  | -7.18166100 | C | -6.95819100 | 2.60919700  | -10.69330100 |
| C | -4.56946800 | -1.07945700 | -6.34596700 | N | -7.73140400 | 1.63493600  | -9.97160100  |
| C | -4.27902900 | 0.14459800  | -8.11315000 | C | -7.32697800 | 0.33874600  | -9.97452900  |
| N | -5.01350000 | -0.84379000 | -7.63220300 | O | -6.40898300 | 0.03604900  | -10.81286400 |
| C | -9.56332300 | -3.95541300 | -4.12769900 | O | -7.86865600 | -0.44534600 | -9.13088600  |
| C | -9.02986500 | -3.04699900 | -5.16783800 | C | -5.99742500 | 1.45357700  | -14.50229300 |
| N | -9.79453400 | -2.08864500 | -5.81273500 | C | -6.27940300 | 0.02439300  | -14.87453400 |
| C | -7.81894300 | -3.01826200 | -5.79944300 | N | -6.35171800 | -1.04329400 | -13.97461800 |

|    |              |              |              |   |              |              |              |
|----|--------------|--------------|--------------|---|--------------|--------------|--------------|
| C  | -6.51990200  | -0.45502500  | -16.13660300 | C | -10.54105100 | -9.24035800  | -13.72231500 |
| C  | -6.62011200  | -2.12628400  | -14.69698400 | O | -9.68084500  | -8.59344100  | -14.31546100 |
| N  | -6.72905500  | -1.81179300  | -16.00341000 | N | -11.70162100 | -9.60367900  | -14.32565800 |
| C  | -0.67058800  | -2.26303000  | -10.70606800 | N | -7.66906800  | -10.26725200 | -9.81937100  |
| C  | -1.95100300  | -1.92317600  | -11.38058100 | C | -7.14861700  | -9.92147600  | -8.50393200  |
| N  | -2.02147200  | -1.16575700  | -12.53994500 | H | -13.96886800 | -6.23267800  | -7.84710600  |
| C  | -3.25304400  | -2.21521200  | -11.07239000 | H | -13.60619400 | -4.85359600  | -8.87253600  |
| C  | -3.32484200  | -1.02827800  | -12.88426200 | H | -14.81694900 | -4.66967400  | -6.07281100  |
| N  | -4.09282000  | -1.64891100  | -12.00816400 | H | -12.50083400 | -5.59712600  | -5.99442300  |
| Zn | -6.59981500  | -1.85515700  | -8.39638300  | H | -12.56821700 | -3.97094700  | -5.29888100  |
| Zn | -6.13241500  | -1.62898300  | -11.88274700 | H | -11.90868900 | -4.21762200  | -6.93132400  |
| H  | -1.66658600  | -0.28454500  | -4.98609100  | H | -14.19979600 | -2.25001900  | -6.18327600  |
| H  | -2.82227100  | 0.89286800   | -4.34759300  | H | -13.63893700 | -2.46461600  | -7.85296300  |
| H  | -4.99671300  | -1.86177600  | -5.74232200  | H | -15.35015100 | -2.65643100  | -7.45467500  |
| H  | -2.70581300  | 1.28891800   | -7.29957400  | H | -16.06009500 | -4.24568800  | -8.93319700  |
| H  | -4.37957400  | 0.57117700   | -9.10034200  | H | -10.30183900 | -8.38859600  | -4.74918300  |
| H  | -8.74895900  | -4.53737000  | -3.69125500  | H | -9.28877000  | -8.53998200  | -6.19846300  |
| H  | -10.29230000 | -4.65930000  | -4.54322600  | H | -10.16065400 | -10.93706600 | -5.44281300  |
| H  | -6.95474900  | -3.64085800  | -5.63808700  | H | -8.25689100  | -8.02467500  | -3.33604200  |
| H  | -10.75838800 | -1.86651000  | -5.60935700  | H | -10.83151600 | -8.83632700  | -11.65293600 |
| H  | -9.39396800  | -0.77750400  | -7.48322600  | H | -10.99723600 | -10.54147800 | -12.0473520  |
| H  | -6.83958900  | 1.89698500   | -13.96028600 | H | -12.42188000 | -10.11915900 | -13.8469830  |
| H  | -6.56493700  | 0.04592000   | -17.09060600 | H | -11.85970700 | -9.30884200  | -15.27762000 |
| H  | -6.99431800  | -2.45730300  | -16.73284400 | H | -8.34231100  | -9.06621600  | -12.35783000 |
| H  | -6.72336600  | -3.13047300  | -14.31069600 | H | -7.88935300  | -10.12630000 | -7.72715100  |
| H  | -0.86927800  | -2.88497000  | -9.83096500  | H | -6.87185700  | -8.86310400  | -8.46047600  |
| H  | 0.00355700   | -2.82586100  | -11.36172600 | H | -7.07381800  | -10.79416200 | -10.44047900 |
| H  | -3.64724300  | -2.82205000  | -10.27282700 | H | -8.56172700  | -10.80456000 | -12.16181100 |
| H  | -1.23571800  | -0.79867000  | -13.05675800 | H | -6.26572700  | -10.53131200 | -8.30657600  |
| H  | -3.66776300  | -0.49981900  | -13.75939900 | H | -7.22426400  | -8.21069100  | -4.76348600  |
| H  | -5.95498100  | 2.75782200   | -10.26937600 | H | -8.32702600  | -6.83231300  | -4.64865600  |
| H  | -10.05428600 | -3.41379800  | -3.31094200  | H | -16.41686700 | -5.57507200  | -7.82266800  |
| H  | -5.11521200  | 1.54335700   | -13.85966300 | H | -15.82151800 | -5.91286000  | -9.45176000  |
| H  | -5.82755400  | 2.04921300   | -15.40210000 | C | -12.65108500 | -2.36154800  | -18.57849700 |
| H  | -7.48045600  | 3.56933200   | -10.67577300 | C | -12.97806300 | -2.52953800  | -17.08256900 |
| H  | -6.83899500  | 2.29975400   | -11.73074600 | C | -11.82682600 | -3.02759700  | -16.22772800 |
| H  | -3.07159500  | -0.83232600  | -4.06490400  | C | -11.15432100 | -2.18291400  | -15.33793600 |
| H  | -0.13274400  | -1.36903900  | -10.36861400 | C | -11.40935400 | -4.36847100  | -16.27758100 |
| H  | -8.30955500  | 1.92326700   | -9.19759100  | C | -10.11497600 | -2.64297800  | -14.52325500 |
| C  | -15.72461500 | -5.23248200  | -8.59995800  | C | -10.37888400 | -4.84891600  | -15.47561200 |
| C  | -14.28162600 | -5.20646600  | -8.07989600  | C | -9.72219500  | -3.98757600  | -14.58072000 |
| C  | -14.08474800 | -4.33573700  | -6.82297500  | O | -8.72911700  | -4.51752200  | -13.81965500 |
| C  | -12.68598500 | -4.54294900  | -6.22761300  | H | -13.82378600 | -3.22306200  | -16.98623000 |
| C  | -14.33537000 | -2.84495700  | -7.09430400  | H | -13.32868300 | -1.56982300  | -16.68452400 |
| C  | -8.21562100  | -7.89747300  | -4.42192900  | H | -11.45462800 | -1.13959000  | -15.26529900 |
| C  | -9.31858700  | -8.69439200  | -5.11653200  | H | -11.91463100 | -5.05772500  | -16.95106600 |
| S  | -9.08324300  | -10.49372700 | -4.76392200  | H | -9.62088600  | -1.96784500  | -13.83069000 |
| C  | -8.94452300  | -9.82759800  | -11.84723600 | H | -10.08170800 | -5.89320200  | -15.50452400 |
| C  | -8.71763800  | -9.60680300  | -10.35974000 | H | -8.35392200  | -3.90373700  | -13.13353600 |
| O  | -9.41370200  | -8.83180500  | -9.68781300  | H | -11.84559900 | -1.63426800  | -18.72588300 |
| C  | -10.40379800 | -9.64489400  | -12.25857700 | H | -12.32636600 | -3.30864600  | -19.02183900 |

H -13.52856800 -2.01369100 -19.13326400  
C -4.81204300 -9.59659900 -11.88594600  
C -4.70410100 -9.03825600 -13.29970900  
O -3.99351500 -9.58321300 -14.14534200  
N -5.42735400 -7.90953200 -13.51824800  
C -5.35625300 -7.14684300 -14.74803800  
C -4.65944200 -5.80712200 -14.46803900  
O -5.10053900 -5.03899400 -13.59503400  
C -6.75339300 -6.85723100 -15.34665400  
O -7.35417800 -8.02770500 -15.84564900  
N -3.59494700 -5.45620500 -15.22842200  
C -2.87766000 -6.29761900 -16.22100100  
C -2.04530500 -7.39187100 -15.54647600  
C -2.03098500 -5.24790300 -16.96773700  
C -1.67710700 -4.21925900 -15.88118200  
C -2.95070800 -4.14992400 -15.02507800  
H -2.76095400 -3.98262200 -13.96104300  
H -3.62651000 -3.35163400 -15.36008900  
H -0.83369600 -4.57671800 -15.28121400  
H -1.39873100 -3.24475000 -16.29273600  
H -1.15381200 -5.69241800 -17.44430900  
H -2.63309300 -4.77289000 -17.75085300  
H -3.60031800 -6.75483900 -16.90305900  
H -1.32670500 -6.95604000 -14.84342300  
H -2.66496800 -8.11611900 -15.01409400  
H -1.47881600 -7.94196300 -16.30655400  
H -4.80912200 -7.75983100 -15.46176800  
H -8.04711000 -8.30737200 -15.22742000  
H -6.61259300 -6.15570100 -16.18482900  
H -7.37233500 -6.34612500 -14.60186600  
H -5.92549900 -7.49217200 -12.73050600  
H -3.81791300 -9.56179200 -11.42902300

H -5.51807700 -9.05224300 -11.26036100  
H -5.08615800 -10.65454300 -11.95647600  
C -2.97579700 -4.24489600 -7.22764800  
C -4.37389300 -4.30714000 -7.83855600  
O -5.34489300 -3.81414200 -7.26318800  
O -4.43427200 -4.88048300 -9.02550300  
N -6.59043400 -4.98154000 -10.69980200  
C -7.35567900 -6.15533100 -10.80749200  
O -6.87020200 -7.19661000 -11.27239900  
N -8.62537700 -6.11029900 -10.35577000  
C -9.07024000 -5.08945100 -9.42162600  
C -8.65954700 -3.68615100 -9.93075000  
C -7.25926400 -3.61907800 -10.67248600  
O -7.37710100 -3.12408500 -11.95407400  
H -2.30539400 -4.97576300 -7.68141600  
H -2.57675100 -3.23825500 -7.39032100  
H -10.16527000 -5.13126400 -9.43107100  
H -8.56325200 -3.05515200 -9.04824300  
H -3.04580000 -4.40769300 -6.15114800  
H -5.92709300 -4.98481200 -11.48327200  
H -9.05240700 -7.03270600 -10.26042800  
O -6.32037700 -2.80669900 -10.00927500  
H -5.34890300 -4.84431500 -9.45809000  
C -9.79480900 -3.08642500 -10.76996100  
H -10.69633800 -2.99563000 -10.15217700  
H -9.53495800 -2.09507000 -11.14133200  
H -10.03637400 -3.72296300 -11.62387100  
C -8.61352100 -5.43212600 -7.99648600  
H -7.53574300 -5.29487300 -7.86996400  
H -9.12189700 -4.79896100 -7.26560000  
H -8.86029000 -6.47567600 -7.77757200

**(5S,6S)-Me<sub>2</sub>DHU-EP-II (SkDHPase)**

C -2.73099400 -0.10103300 -4.80017800  
C -3.54275400 -0.17826300 -6.04328300  
N -3.51174600 0.73864400 -7.08535100  
C -4.43169300 -1.13043500 -6.44609400  
C -4.36146700 0.31412400 -8.05634000  
N -4.93009200 -0.82359800 -7.69842200  
C -9.56332600 -3.95541700 -4.12769600  
C -9.03977400 -3.18971400 -5.28911500  
N -9.78029200 -2.23610500 -5.97141100  
C -7.84048600 -3.23730700 -5.94705700  
C -9.03297200 -1.75444400 -6.99218100  
N -7.85164400 -2.34936100 -7.00539200  
C -6.95819100 2.60919600 -10.69330100  
N -7.29924200 1.55231500 -9.77053900  
C -7.04983600 0.24086300 -10.04926200  
O -6.29354600 0.02844200 -11.06868800

O -7.53180200 -0.62944400 -9.26775200  
C -5.99742500 1.45357600 -14.50229300  
C -6.30071200 0.07113400 -15.00435800  
N -6.27612200 -1.07896600 -14.21144000  
C -6.62889500 -0.29810100 -16.28233200  
C -6.57243000 -2.10446500 -15.00700200  
N -6.79174500 -1.66876400 -16.26223900  
C -0.67058800 -2.26303000 -10.70606800  
C -1.93064200 -2.00716500 -11.46699500  
N -1.97070700 -1.24672500 -12.62796500  
C -3.23257300 -2.37439600 -11.24046800  
C -3.25137700 -1.17102400 -13.05318500  
N -4.04477800 -1.83922100 -12.22739600  
Zn -6.35785700 -2.17669200 -8.39398700  
Zn -6.05128800 -1.54422900 -12.19030600  
H -1.65482200 -0.11085300 -5.00870400



|   |              |              |              |   |              |              |              |
|---|--------------|--------------|--------------|---|--------------|--------------|--------------|
| H | -2.94620400  | 0.80191300   | -4.21697300  | H | -13.94139100 | -2.51831700  | -7.30023300  |
| H | -4.71658400  | -2.04178000  | -5.94989000  | H | -15.59651900 | -2.98200800  | -6.88968000  |
| H | -2.95349800  | 1.57890400   | -7.12187800  | H | -16.13156000 | -4.22577300  | -8.73507500  |
| H | -4.53153200  | 0.84076500   | -8.98235700  | H | -8.85878700  | -6.51322700  | -5.96227600  |
| H | -8.76408000  | -4.56097700  | -3.69555100  | H | -7.89424600  | -7.86456500  | -6.55485400  |
| H | -10.37475200 | -4.63039200  | -4.41772500  | H | -10.03597400 | -8.52898100  | -7.60362000  |
| H | -6.97484200  | -3.85221900  | -5.75743200  | H | -8.98823000  | -7.64917200  | -3.68658600  |
| H | -10.73226100 | -1.97121700  | -5.76272700  | H | -10.50899400 | -9.01639400  | -12.00302300 |
| H | -9.35260000  | -1.00211200  | -7.69529300  | H | -11.22804500 | -10.47028600 | -12.6845400  |
| H | -6.66791800  | 1.73430200   | -13.68506600 | H | -10.76036200 | -8.96290100  | -14.63866400 |
| H | -6.76014100  | 0.28593400   | -17.17915700 | H | -9.23138700  | -9.25521500  | -15.43510600 |
| H | -7.08762200  | -2.25307400  | -17.03065200 | H | -9.05963000  | -11.63140300 | -11.55809400 |
| H | -6.62734200  | -3.14952600  | -14.72631600 | H | -7.75066400  | -9.91017100  | -7.59088800  |
| H | -0.88652200  | -2.91733800  | -9.85946900  | H | -6.87041800  | -8.89642100  | -8.76199200  |
| H | 0.08841000   | -2.75646800  | -11.32332200 | H | -7.52682800  | -11.39792800 | -9.99885800  |
| H | -3.62721000  | -3.03026600  | -10.47366500 | H | -10.54433300 | -11.33867300 | -10.6417760  |
| H | -1.17509300  | -0.83460800  | -13.09339500 | H | -6.23998500  | -10.49709100 | -8.32188900  |
| H | -3.56478000  | -0.64379400  | -13.94045600 | H | -7.97872200  | -8.95879500  | -4.30785100  |
| H | -5.93184300  | 2.48432300   | -11.04102700 | H | -7.31833300  | -7.31876600  | -4.17525500  |
| H | -9.94221900  | -3.29508800  | -3.33937400  | H | -16.38332700 | -5.76786700  | -7.90692300  |
| H | -4.97300200  | 1.53204600   | -14.12078600 | H | -15.78259600 | -5.73983300  | -9.56809500  |
| H | -6.11296700  | 2.17950700   | -15.30984900 | C | -12.65108500 | -2.36154800  | -18.57849700 |
| H | -7.03997400  | 3.57173600   | -10.18207800 | C | -13.13566200 | -2.90478600  | -17.22587900 |
| H | -7.61483100  | 2.63370100   | -11.57326900 | C | -11.97874900 | -3.31271400  | -16.34406800 |
| H | -2.95457400  | -0.96400100  | -4.17042300  | C | -11.43274300 | -2.43135600  | -15.40560300 |
| H | -0.23555900  | -1.33501100  | -10.31751500 | C | -11.36573900 | -4.56475700  | -16.49966200 |
| H | -7.97047300  | 1.72489700   | -9.03849900  | C | -10.31146200 | -2.77336700  | -14.64873400 |
| C | -15.72463100 | -5.23250100  | -8.59995100  | C | -10.25021200 | -4.92604700  | -15.75285400 |
| C | -14.28160600 | -5.20644000  | -8.07990400  | C | -9.71468800  | -4.02828100  | -14.82084000 |
| C | -14.12623200 | -4.60035900  | -6.67182200  | O | -8.61526300  | -4.43033100  | -14.12580800 |
| C | -12.68824500 | -4.76760300  | -6.16399700  | H | -13.79719400 | -3.76281600  | -17.39596100 |
| C | -14.54815800 | -3.12431700  | -6.61388500  | H | -13.73958100 | -2.14204600  | -16.72048500 |
| C | -8.21562100  | -7.89747300  | -4.42192900  | H | -11.89041400 | -1.45506600  | -15.26194500 |
| C | -8.67099600  | -7.58356300  | -5.84228400  | H | -11.77408200 | -5.27096900  | -17.21925000 |
| S | -10.21028000 | -8.51961100  | -6.26198200  | H | -9.90226900  | -2.07937900  | -13.92009000 |
| C | -9.71909500  | -10.84951600 | -11.17312500 | H | -9.78455200  | -5.90016900  | -15.86320400 |
| C | -9.00767000  | -10.00810000 | -10.12026300 | H | -8.40680200  | -3.81027300  | -13.39950100 |
| O | -9.47277300  | -8.93375100  | -9.71050000  | H | -12.01275600 | -1.48251900  | -18.43944700 |
| C | -10.28414300 | -10.03435800 | -12.3393420  | H | -12.06504800 | -3.11495100  | -19.11492400 |
| C | -9.33167600  | -9.94981900  | -13.52966700 | H | -13.49202100 | -2.07106300  | -19.21733900 |
| O | -8.17104100  | -10.36917200 | -13.48056900 | C | -4.81204300  | -9.59659900  | -11.88594600 |
| N | -9.86765500  | -9.42932500  | -14.65996800 | C | -4.58143100  | -9.17443800  | -13.32620600 |
| N | -7.88255700  | -10.54384600 | -9.59783200  | O | -3.64725700  | -9.62395200  | -13.98969400 |
| C | -7.14861700  | -9.92147600  | -8.50393200  | N | -5.45588900  | -8.23591300  | -13.79116000 |
| H | -13.88850100 | -6.23069100  | -8.06266200  | C | -5.41565300  | -7.74147900  | -15.15534900 |
| H | -13.64614300 | -4.64735000  | -8.78296700  | C | -4.97433600  | -6.26625400  | -15.21556400 |
| H | -14.78515000 | -5.16487000  | -5.99561000  | O | -5.58967000  | -5.39640900  | -14.57289500 |
| H | -12.37430800 | -5.81688300  | -6.16176600  | C | -6.82445000  | -7.83921500  | -15.78317900 |
| H | -12.59143300 | -4.38553900  | -5.14047200  | O | -7.25806300  | -9.18094200  | -15.90962100 |
| H | -11.98505000 | -4.21437900  | -6.80178000  | N | -3.97206600  | -5.91682300  | -16.05377300 |
| H | -14.42061200 | -2.71768500  | -5.60404300  | C | -2.94719700  | -6.81798300  | -16.64117500 |

|   |             |              |              |   |              |             |              |
|---|-------------|--------------|--------------|---|--------------|-------------|--------------|
| C | -2.04530500 | -7.39187100  | -15.54647600 | N | -6.67806400  | -5.64547300 | -11.89169200 |
| C | -2.22550700 | -5.87487600  | -17.62102900 | C | -7.72401400  | -6.52405000 | -11.79502800 |
| C | -2.24241500 | -4.51553200  | -16.90269100 | O | -7.88715500  | -7.45753500 | -12.60127100 |
| C | -3.60359100 | -4.49667800  | -16.18905900 | N | -8.65257000  | -6.31821000 | -10.81285700 |
| H | -3.57755500 | -4.01740500  | -15.20614700 | C | -8.62201100  | -5.33248200 | -9.73933300  |
| H | -4.36901400 | -3.97745200  | -16.78058200 | C | -8.81212600  | -3.85332000 | -10.23050000 |
| H | -1.42984600 | -4.46414500  | -16.17114900 | C | -7.61906600  | -3.17854200 | -10.89946400 |
| H | -2.12235200 | -3.67110200  | -17.58671400 | O | -7.70299000  | -2.71289800 | -12.08850200 |
| H | -1.21802200 | -6.22506400  | -17.85825300 | H | -2.24201800  | -4.91797300 | -7.67395000  |
| H | -2.78885000 | -5.81257700  | -18.55893700 | H | -2.53696300  | -3.24458600 | -7.13595100  |
| H | -3.43484700 | -7.63074000  | -17.18650000 | H | -9.55372900  | -5.52248500 | -9.19463700  |
| H | -1.59360600 | -6.58901100  | -14.95346900 | H | -8.91829800  | -3.28000500 | -9.30111500  |
| H | -2.58763500 | -8.06813000  | -14.88488000 | H | -3.22119100  | -4.58140700 | -6.21620000  |
| H | -1.23270600 | -7.97021400  | -16.00131700 | H | -6.14635300  | -5.70156300 | -12.75853200 |
| H | -4.73742400 | -8.38945600  | -15.70965800 | H | -9.19311300  | -7.15632100 | -10.61784400 |
| H | -7.26362100 | -9.60440500  | -15.02385200 | O | -6.54222800  | -2.98336500 | -10.25149400 |
| H | -6.79767000 | -7.42130400  | -16.79607900 | H | -6.20146000  | -5.29238400 | -11.07379000 |
| H | -7.51130900 | -7.23474300  | -15.17655900 | C | -10.10948600 | -3.71007000 | -11.03241500 |
| H | -6.29878000 | -8.00607400  | -13.24915600 | H | -10.95646000 | -4.04885700 | -10.42710500 |
| H | -4.45984000 | -8.80939600  | -11.21007200 | H | -10.28859300 | -2.67067300 | -11.31637400 |
| H | -5.87530500 | -9.76546600  | -11.69109000 | H | -10.08609000 | -4.31937700 | -11.93622400 |
| H | -4.24308300 | -10.50697000 | -11.69603200 | C | -7.48525100  | -5.58103300 | -8.74214400  |
| C | -2.97579700 | -4.24489600  | -7.22764900  | H | -6.49086700  | -5.34077100 | -9.11715900  |
| C | -4.22726000 | -4.15682900  | -8.09581500  | H | -7.63081600  | -4.99564000 | -7.83394300  |
| O | -5.25272200 | -3.60839500  | -7.52110400  | H | -7.50997800  | -6.63865900 | -8.46914300  |
| O | -4.18575900 | -4.55625600  | -9.26864100  |   |              |             |              |

**(5S,6R)-Me<sub>2</sub>DHU-ES-II (SkDHPase)**

|   |             |             |             |    |             |             |             |
|---|-------------|-------------|-------------|----|-------------|-------------|-------------|
| C | 5.63384000  | -2.00726400 | 6.51293800  | N  | 2.67292800  | 2.82150600  | -4.28026900 |
| C | 4.95552000  | -1.07200000 | 5.57905900  | C  | 6.25237700  | -2.97655300 | -0.00449600 |
| N | 5.48869300  | 0.12819700  | 5.13226700  | C  | 5.61323500  | -1.70827400 | -0.43894300 |
| C | 3.74701100  | -1.17108000 | 4.95324300  | N  | 6.19487400  | -0.74815500 | -1.25459900 |
| C | 4.60694300  | 0.69667700  | 4.27107600  | C  | 4.37931900  | -1.21269400 | -0.13423800 |
| N | 3.54186000  | -0.07576000 | 4.13582200  | C  | 5.31198300  | 0.26994900  | -1.40995600 |
| C | -2.09696200 | -0.62150500 | 7.06389900  | N  | 4.20051500  | 0.01592600  | -0.73764700 |
| C | -1.19061200 | -0.06449400 | 6.01572900  | C  | 2.98567000  | -4.05280500 | 3.05273500  |
| N | -1.03131500 | 1.29853200  | 5.80606100  | C  | 2.16591600  | -2.90381500 | 2.45363500  |
| C | -0.36202300 | -0.65423400 | 5.09516800  | O  | 1.63028000  | -2.08160600 | 3.28522600  |
| C | -0.14061200 | 1.48497100  | 4.80193200  | O  | 2.11889400  | -2.79658300 | 1.20898600  |
| N | 0.28113900  | 0.31681200  | 4.34825300  | Zn | 1.80506200  | 0.00699200  | 2.99346600  |
| C | 4.62161700  | 4.44346200  | 2.35277000  | Zn | 2.61839300  | 1.23538100  | -0.23568800 |
| N | 3.61137900  | 3.60709900  | 2.96684400  | N  | -0.60012800 | -0.47843400 | -0.95748700 |
| C | 2.81433400  | 2.77809600  | 2.20662500  | C  | -1.75601200 | -1.21347600 | -0.62877000 |
| O | 3.16183000  | 2.66846200  | 0.97977600  | O  | -2.10833600 | -2.14703000 | -1.35246300 |
| O | 1.85973300  | 2.18729400  | 2.78991400  | N  | -2.41866900 | -0.80196500 | 0.46309600  |
| C | 4.89511600  | 4.22007600  | -1.72672100 | C  | -1.81322100 | 0.09246200  | 1.45480900  |
| C | 3.89217100  | 3.49993300  | -2.57878400 | C  | -1.09580900 | 1.24708100  | 0.72502100  |
| N | 3.11188100  | 2.42221400  | -2.15400200 | C  | -0.26210800 | 0.71015900  | -0.41908800 |
| C | 3.61220200  | 3.75577300  | -3.89739200 | O  | 0.63814400  | 1.39796200  | -0.96561800 |
| C | 2.40366600  | 2.04151400  | -3.20809800 | H  | 6.58438400  | -2.37591000 | 6.10958200  |

|   |             |             |             |   |             |             |             |
|---|-------------|-------------|-------------|---|-------------|-------------|-------------|
| H | 5.84511100  | -1.54588200 | 7.48484000  | N | -4.39731800 | -4.51424900 | -0.38878300 |
| H | 3.01039400  | -1.95427800 | 5.00441000  | C | -3.78255900 | -4.98756800 | 0.84517500  |
| H | 6.37948900  | 0.51977600  | 5.40056000  | H | -6.44159700 | 1.80424100  | 3.13460800  |
| H | 4.75442700  | 1.65521200  | 3.79536700  | H | -5.21782600 | 3.06064600  | 3.27832000  |
| H | -2.03728500 | -1.71163600 | 7.06137700  | H | -7.05246700 | 2.15045800  | 5.54627900  |
| H | -3.14060800 | -0.34182300 | 6.88911700  | H | -5.51853900 | 0.29321100  | 4.85816300  |
| H | -0.16514300 | -1.69910600 | 4.91303100  | H | -5.13097900 | 0.90832300  | 6.47069100  |
| H | -1.50939100 | 2.03070900  | 6.31085000  | H | -4.12870800 | 1.36705300  | 5.08144300  |
| H | 0.18845700  | 2.44254500  | 4.43054200  | H | -5.44512200 | 3.33839400  | 7.05194700  |
| H | 4.44704500  | 4.53637200  | -0.78104600 | H | -4.53720900 | 3.90502300  | 5.63952900  |
| H | 3.99078200  | 4.50610300  | -4.57326400 | H | -6.19099600 | 4.46309000  | 5.91719800  |
| H | 2.21588000  | 2.76015200  | -5.17790400 | H | -7.00898800 | 4.75482500  | 3.82909400  |
| H | 1.73076400  | 1.19640900  | -3.24617800 | H | -3.14072200 | -2.29432400 | 4.46051400  |
| H | 5.53034400  | -3.55408100 | 0.57566400  | H | -3.18801800 | -3.68915300 | 3.37963000  |
| H | 6.56918900  | -3.59590100 | -0.85185900 | H | -5.22993600 | -2.59828300 | 2.50813600  |
| H | 3.61286700  | -1.68943400 | 0.45567400  | H | -4.09810200 | -3.73904800 | 6.32211600  |
| H | 7.11405100  | -0.79412800 | -1.66943000 | H | -5.63857700 | -0.87998600 | -1.26416000 |
| H | 5.50186000  | 1.14790500  | -2.00624900 | H | -7.04298600 | -1.74355600 | -1.87133700 |
| H | 5.26841500  | 3.83455900  | 1.71983700  | H | -7.73967400 | -0.15906600 | -3.39439800 |
| H | 3.08982700  | -4.86611100 | 2.33271400  | H | -6.74670500 | 0.36326500  | -4.72081100 |
| H | 3.98391900  | -3.67280500 | 3.29887400  | H | -4.20901800 | -2.66691200 | -2.49539300 |
| H | -1.04823200 | -0.46738800 | 2.00801300  | H | -4.45647000 | -4.82025700 | 1.68759300  |
| H | -0.38052900 | 1.70625700  | 1.41381200  | H | -2.83295100 | -4.47521100 | 1.03494200  |
| H | -1.81769000 | -0.27512700 | 8.06555500  | H | -4.30045700 | -5.08507500 | -1.21559000 |
| H | 5.75066100  | 3.58080200  | -1.47757800 | H | -5.66225600 | -3.66947300 | -2.48392900 |
| H | 5.27502100  | 5.09937200  | -2.25169000 | H | -3.59456400 | -6.05814900 | 0.75322000  |
| H | 5.22867700  | 4.90369500  | 3.13706500  | H | -4.07614500 | -5.12661100 | 5.22853600  |
| H | 4.19697000  | 5.24320700  | 1.73192300  | H | -2.55311500 | -4.36328800 | 5.72093600  |
| H | 4.99165700  | -2.87210100 | 6.68986500  | H | -8.23106600 | 3.47743300  | 3.79741200  |
| H | 2.53510400  | -4.42492900 | 3.97654800  | H | -7.39102300 | 3.94109300  | 2.31379500  |
| H | 7.13393300  | -2.80386200 | 0.62468000  | C | -2.31308000 | 7.01875400  | -5.68287000 |
| H | 3.20580200  | 3.89795800  | 3.84406300  | C | -3.14974200 | 6.58674600  | -4.47043600 |
| H | -0.10562900 | -0.77143500 | -1.81650200 | C | -2.69875400 | 5.22509200  | -4.00662300 |
| H | -3.26584600 | -1.33273800 | 0.67014400  | C | -1.50428700 | 5.09334000  | -3.29042400 |
| O | 1.78111300  | -0.05905900 | 1.05791100  | C | -3.36509300 | 4.05874500  | -4.40235600 |
| H | 1.77058700  | -1.02136200 | 0.86588100  | C | -0.96513900 | 3.84216800  | -3.00865900 |
| C | -7.26178300 | 3.78527500  | 3.38989700  | C | -2.85047600 | 2.79596000  | -4.12114600 |
| C | -6.18840000 | 2.72649800  | 3.67293800  | C | -1.63469700 | 2.69159100  | -3.44099100 |
| C | -6.04697600 | 2.39860100  | 5.17520500  | O | -1.13491400 | 1.44153900  | -3.21845000 |
| C | -5.15863700 | 1.17005700  | 5.40614800  | H | -4.21216000 | 6.56702300  | -4.73852000 |
| C | -5.53087100 | 3.59449000  | 5.99014100  | H | -3.04055100 | 7.32471600  | -3.66610400 |
| C | -3.59670900 | -4.16903700 | 5.44878800  | H | -0.97479000 | 5.98602200  | -2.96522600 |
| C | -3.66486200 | -3.23069300 | 4.24822100  | H | -4.29794500 | 4.14208700  | -4.95497800 |
| S | -5.42700900 | -2.86058100 | 3.82019300  | H | -0.03321100 | 3.75116800  | -2.45700100 |
| C | -5.15783400 | -2.84000900 | -1.97568100 | H | -3.36693000 | 1.88850100  | -4.41897200 |
| C | -4.79664300 | -3.23502100 | -0.55079700 | H | -0.33514000 | 1.50668500  | -2.67159800 |
| O | -4.82679800 | -2.43056900 | 0.39511800  | H | -1.25038900 | 7.06800400  | -5.42501300 |
| C | -5.98031200 | -1.55575700 | -2.05737700 | H | -2.42147700 | 6.30258000  | -6.50359800 |
| C | -5.77466800 | -0.83629400 | -3.38711700 | H | -2.61598500 | 8.00501800  | -6.05197300 |
| O | -4.69402200 | -0.83335600 | -3.97623400 | C | -2.04006200 | 2.33696300  | 0.17447500  |
| N | -6.84724400 | -0.15492000 | -3.86065200 | H | -2.54265800 | 2.85101400  | 0.99696000  |

|   |             |             |             |   |             |             |             |
|---|-------------|-------------|-------------|---|-------------|-------------|-------------|
| H | -1.47841300 | 3.08105200  | -0.39166500 | H | 5.08772800  | -1.06262900 | -5.87786100 |
| H | -2.80220500 | 1.91292800  | -0.48509600 | H | 4.00212900  | -2.96580700 | -7.48474900 |
| C | -1.52387500 | -5.19165400 | -2.59389500 | H | 3.28047800  | -1.35077700 | -7.50742900 |
| C | -1.00771200 | -4.50504300 | -3.84603100 | H | 1.35646700  | -2.64062500 | -6.97729200 |
| O | -0.64325300 | -5.15222400 | -4.82668000 | H | 3.08642500  | -4.36843300 | -5.10832900 |
| N | -0.95467600 | -3.14910600 | -3.76465100 | H | 1.34503400  | -4.58902200 | -5.40451300 |
| C | -0.45304500 | -2.31860600 | -4.83934800 | H | 2.50226300  | -4.85369900 | -6.70842700 |
| C | 0.86013700  | -1.65898200 | -4.39325100 | H | -0.30698200 | -2.98167400 | -5.69088700 |
| O | 0.87657400  | -0.91611400 | -3.38445400 | H | -3.37524200 | -1.58644700 | -5.15299600 |
| C | -1.47102900 | -1.22560900 | -5.24288500 | H | -1.00269400 | -0.60002100 | -6.01974700 |
| O | -2.64564900 | -1.81299600 | -5.75043500 | H | -1.66558100 | -0.57536800 | -4.38501200 |
| N | 1.98309700  | -1.85477600 | -5.10935400 | H | -1.30551800 | -2.69566700 | -2.92335800 |
| C | 2.18277900  | -2.76409800 | -6.27230300 | H | -0.70452800 | -5.77044000 | -2.15602800 |
| C | 2.28051000  | -4.22849700 | -5.83644500 | H | -1.90744500 | -4.49691800 | -1.84616300 |
| C | 3.49259100  | -2.21839300 | -6.87211500 | H | -2.29670400 | -5.90878900 | -2.88752000 |
| C | 4.30264100  | -1.78534000 | -5.63996700 | C | -2.88494600 | 0.54397100  | 2.44050900  |
| C | 3.23885200  | -1.19363200 | -4.70461700 | H | -3.28695700 | -0.31290800 | 2.98773400  |
| H | 3.43290800  | -1.36383300 | -3.64229700 | H | -2.45929200 | 1.23822600  | 3.16889200  |
| H | 3.13951800  | -0.11151500 | -4.84597600 | H | -3.71825800 | 1.03826900  | 1.93540600  |
| H | 4.78274100  | -2.65224700 | -5.17549900 |   |             |             |             |

**(5S,6R)-Me<sub>2</sub>DHU-TS1-II (SkDHPase)**

|   |             |             |              |    |              |             |              |
|---|-------------|-------------|--------------|----|--------------|-------------|--------------|
| C | -2.73099000 | -0.10103100 | -4.80017200  | C  | -2.92951700  | -4.25382000 | -7.22607300  |
| C | -3.57095000 | -0.20349100 | -6.02494300  | C  | -4.19850400  | -4.14760500 | -8.07700600  |
| N | -3.58134800 | 0.72109500  | -7.06065900  | O  | -5.25059000  | -3.68866700 | -7.49867300  |
| C | -4.44709000 | -1.17391100 | -6.41859600  | O  | -4.13148600  | -4.45026000 | -9.29018600  |
| C | -4.43951400 | 0.28554800  | -8.01815100  | Zn | -6.37202000  | -2.19366300 | -8.46569300  |
| N | -4.97624800 | -0.86740400 | -7.65880300  | Zn | -6.03675400  | -1.64772400 | -12.09691600 |
| C | -9.56332400 | -3.95540500 | -4.12770500  | H  | -1.66049000  | -0.08590500 | -5.03552500  |
| C | -9.02941900 | -3.22147700 | -5.31024300  | H  | -2.95480100  | 0.79989900  | -4.21723600  |
| N | -9.70566800 | -2.17241500 | -5.91662200  | H  | -4.70987800  | -2.09311700 | -5.92359800  |
| C | -7.88220500 | -3.36578500 | -6.04578400  | H  | -3.04448500  | 1.57504000  | -7.10004300  |
| C | -8.97367300 | -1.73083500 | -6.96719600  | H  | -4.64213500  | 0.81889900  | -8.93377900  |
| N | -7.86200600 | -2.43925500 | -7.07259100  | H  | -8.84416000  | -4.71143100 | -3.80669000  |
| C | -6.95819100 | 2.60919300  | -10.69329900 | H  | -10.50452300 | -4.46407400 | -4.35858000  |
| N | -7.28680000 | 1.54757900  | -9.76720700  | H  | -7.06862700  | -4.06340000 | -5.92435800  |
| C | -7.09786800 | 0.23143100  | -10.08652400 | H  | -10.60380300 | -1.80895300 | -5.63228800  |
| O | -6.41771600 | 0.01904800  | -11.15134500 | H  | -9.25378200  | -0.92478400 | -7.62612300  |
| O | -7.55958500 | -0.64160800 | -9.29147300  | H  | -6.65717700  | 1.69476700  | -13.66429200 |
| C | -5.99742500 | 1.45357300  | -14.50229200 | H  | -6.65296700  | 0.27194300  | -17.19356200 |
| C | -6.25054000 | 0.06411700  | -15.00477900 | H  | -6.91148800  | -2.27420000 | -17.05556100 |
| N | -6.21576500 | -1.07982100 | -14.20671500 | H  | -6.47601200  | -3.14899800 | -14.72075200 |
| C | -6.53009200 | -0.30979300 | -16.29391800 | H  | -0.92683000  | -2.96735400 | -9.91252800  |
| C | -6.45659600 | -2.10820500 | -15.01232900 | H  | 0.09810400   | -2.73220300 | -11.33105900 |
| N | -6.65170100 | -1.68409000 | -16.27891200 | H  | -3.56109300  | -2.98910200 | -10.50292100 |
| C | -0.67059400 | -2.26302900 | -10.70607000 | H  | -1.15287800  | -0.66940600 | -13.03726400 |
| C | -1.89837000 | -1.93287600 | -11.47340400 | H  | -3.55330400  | -0.44907100 | -13.85795800 |
| N | -1.94280700 | -1.11187300 | -12.59065200 | H  | -5.94538200  | 2.47099100  | -11.07450200 |
| C | -3.19332400 | -2.30970900 | -11.25772700 | H  | -2.20681400  | -4.92339400 | -7.69463400  |
| C | -3.23094400 | -1.01802200 | -13.00057100 | H  | -2.48684100  | -3.25508300 | -7.13926000  |
| N | -4.01284700 | -1.73190400 | -12.20600600 | H  | -9.74166400  | -3.28460200 | -3.27941000  |

|   |              |              |              |   |              |             |              |
|---|--------------|--------------|--------------|---|--------------|-------------|--------------|
| H | -4.96821500  | 1.57763000   | -14.14518100 | H | -16.31785500 | -5.98585400 | -8.06976300  |
| H | -6.16508800  | 2.18050000   | -15.30009100 | H | -15.75715300 | -5.47866900 | -9.66645900  |
| H | -7.00883300  | 3.56746900   | -10.17008800 | C | -12.65108600 | -2.36154800 | -18.57849800 |
| H | -7.64071300  | 2.65050600   | -11.55229200 | C | -13.17165300 | -2.82950800 | -17.21179100 |
| H | -2.91806100  | -0.96526000  | -4.16021100  | C | -12.03384200 | -3.30150100 | -16.33977300 |
| H | -3.16117200  | -4.59882000  | -6.21513900  | C | -11.24987600 | -2.38236200 | -15.63458300 |
| H | -0.22212800  | -1.37647300  | -10.24187400 | C | -11.66049700 | -4.65164200 | -16.29829500 |
| H | -7.93206200  | 1.72736100   | -9.01380000  | C | -10.11763200 | -2.78499500 | -14.92973400 |
| C | -15.72463100 | -5.23248700  | -8.59995900  | C | -10.53969600 | -5.07806500 | -15.59217800 |
| C | -14.28160800 | -5.20645900  | -8.07989700  | C | -9.75591400  | -4.13821500 | -14.91345900 |
| C | -14.20000900 | -4.98042400  | -6.55462600  | O | -8.65101000  | -4.58787700 | -14.25732700 |
| C | -12.76996600 | -5.16070200  | -6.03169700  | H | -13.89914900 | -3.63737600 | -17.35269200 |
| C | -14.75519400 | -3.61081000  | -6.13345300  | H | -13.70835700 | -2.00660800 | -16.72386400 |
| C | -8.21561700  | -7.89747900  | -4.42193200  | H | -11.52253600 | -1.32921100 | -15.64446800 |
| C | -8.66146200  | -7.58482900  | -5.84416800  | H | -12.25998900 | -5.38409500 | -16.83425400 |
| S | -10.17596100 | -8.55277500  | -6.28569900  | H | -9.51575100  | -2.05972600 | -14.38873600 |
| C | -9.12447900  | -9.90592900  | -11.75638000 | H | -10.26331900 | -6.12702700 | -15.54337300 |
| C | -8.81192600  | -9.62798800  | -10.29381900 | H | -8.27564400  | -3.88621600 | -13.68595200 |
| O | -9.48267000  | -8.83374100  | -9.61400600  | H | -11.94305900 | -1.53417800 | -18.46332900 |
| C | -10.56835100 | -9.57696600  | -12.12882800 | H | -12.12931300 | -3.17378300 | -19.09481800 |
| C | -10.71750600 | -9.24284000  | -13.60913100 | H | -13.46732400 | -2.01911600 | -19.22415000 |
| O | -9.82987100  | -8.69106600  | -14.25873500 | N | -7.12043000  | -5.05817000 | -11.62238200 |
| N | -11.91772300 | -9.54900500  | -14.16195700 | C | -7.59335200  | -6.22910200 | -11.04063500 |
| N | -7.73523500  | -10.27031300 | -9.79249400  | O | -7.22339400  | -7.33208800 | -11.46676800 |
| C | -7.14862100  | -9.92147200  | -8.50393100  | N | -8.48371800  | -6.09108900 | -10.03991400 |
| H | -13.79160200 | -6.15835300  | -8.32076100  | C | -8.77007100  | -4.81318100 | -9.39095100  |
| H | -13.70974100 | -4.42210300  | -8.59678300  | C | -8.81540200  | -3.70025900 | -10.45823900 |
| H | -14.82322200 | -5.75359200  | -6.08110900  | C | -7.59101900  | -3.78441000 | -11.36817100 |
| H | -12.35381700 | -6.13754300  | -6.29839700  | O | -7.49639100  | -2.94593800 | -12.36058600 |
| H | -12.74402900 | -5.07486900  | -4.93868400  | H | -7.94956600  | -4.58207400 | -8.70009100  |
| H | -12.10678000 | -4.39026600  | -6.44595200  | H | -8.76285700  | -2.73059500 | -9.95912600  |
| H | -14.68422500 | -3.47584100  | -5.04842300  | H | -6.50453400  | -5.17598200 | -12.43797700 |
| H | -14.18942600 | -2.79821200  | -6.60892900  | H | -8.86521100  | -6.96564700 | -9.68363200  |
| H | -15.80573400 | -3.48547500  | -6.40919900  | O | -6.22967600  | -3.01818200 | -10.28176900 |
| H | -16.22470300 | -4.26739100  | -8.47576400  | H | -5.55247900  | -3.72317500 | -10.11245400 |
| H | -8.87146600  | -6.51692200  | -5.95433300  | C | -10.08974700 | -3.73375300 | -11.32337000 |
| H | -7.87396200  | -7.84045500  | -6.55605300  | H | -10.97187900 | -3.55746000 | -10.70346200 |
| H | -9.90104400  | -8.66321300  | -7.60618100  | H | -10.05489900 | -2.94959100 | -12.07966600 |
| H | -9.00561600  | -7.67560000  | -3.69672500  | H | -10.21375600 | -4.69317300 | -11.83198600 |
| H | -10.87119000 | -8.68870000  | -11.56115800 | C | -4.82811000  | -9.59760700 | -11.88554700 |
| H | -11.25339100 | -10.38114400 | -11.8395510  | C | -4.69951400  | -9.08000000 | -13.30937100 |
| H | -12.65484800 | -9.99585300  | -13.64155700 | O | -3.92373300  | -9.60251200 | -14.10940600 |
| H | -12.07937300 | -9.30232300  | -15.12698600 | N | -5.47735400  | -8.00220300 | -13.59190800 |
| H | -8.46387800  | -9.25207300  | -12.33665800 | C | -5.47065700  | -7.34590400 | -14.88377400 |
| H | -7.89748200  | -10.00963300 | -7.71457200  | C | -4.88122300  | -5.93657600 | -14.73071800 |
| H | -6.75195500  | -8.90017000  | -8.51470300  | O | -5.43113100  | -5.10561300 | -13.97513400 |
| H | -7.17491000  | -10.81273300 | -10.43331000 | C | -6.89218900  | -7.24195300 | -15.48371200 |
| H | -8.87042200  | -10.94008800 | -12.01413900 | O | -7.40237500  | -8.52378500 | -15.76326500 |
| H | -6.33379900  | -10.61536000 | -8.29251700  | N | -3.78991200  | -5.58751400 | -15.44068400 |
| H | -7.95434400  | -8.95347700  | -4.31274700  | C | -2.96654000  | -6.44423200 | -16.33670700 |
| H | -7.33687700  | -7.29860200  | -4.15553600  | C | -2.06137100  | -7.39288000 | -15.54607400 |

|   |             |             |              |   |              |              |              |
|---|-------------|-------------|--------------|---|--------------|--------------|--------------|
| C | -2.18896100 | -5.38869700 | -17.14648100 | H | -4.86783500  | -7.97168400  | -15.54049900 |
| C | -1.94015100 | -4.26244600 | -16.13045300 | H | -8.17593600  | -8.67085300  | -15.19707200 |
| C | -3.23943200 | -4.22542800 | -15.31286800 | H | -6.82059400  | -6.66077000  | -16.41776100 |
| H | -3.09373600 | -3.97310000 | -14.25908200 | H | -7.53325300  | -6.67313300  | -14.80315400 |
| H | -3.95695600 | -3.50330400 | -15.72112700 | H | -6.10600200  | -7.64829900  | -12.86976300 |
| H | -1.09117400 | -4.51327500 | -15.48675900 | H | -3.85917800  | -9.48454900  | -11.38957100 |
| H | -1.72249100 | -3.30115700 | -16.60400300 | H | -5.59196500  | -9.07809900  | -11.30632100 |
| H | -1.27012600 | -5.79729400 | -17.57382800 | H | -5.03710800  | -10.67151400 | -11.92827900 |
| H | -2.80878000 | -5.01982800 | -17.97182600 | C | -10.05689000 | -4.93999900  | -8.58091600  |
| H | -3.62411400 | -7.02151900 | -16.99224900 | H | -9.94223900  | -5.67692800  | -7.78244900  |
| H | -1.41069000 | -6.83668400 | -14.86254700 | H | -10.31170000 | -3.98135700  | -8.12263000  |
| H | -2.63572000 | -8.12379900 | -14.97357600 | H | -10.89479100 | -5.25788800  | -9.20561800  |
| H | -1.42191300 | -7.94868100 | -16.24093600 |   |              |              |              |

**(5S,6R)-Me<sub>2</sub>DHU-INT1-II (SkDHPase)**

|    |             |             |              |   |              |             |              |
|----|-------------|-------------|--------------|---|--------------|-------------|--------------|
| C  | -2.73099300 | -0.10103300 | -4.80017700  | H | -2.92492700  | 0.83651200  | -4.26639900  |
| C  | -3.53559200 | -0.21780300 | -6.04573600  | H | -4.76625400  | -2.04062000 | -5.88376400  |
| N  | -3.46853000 | 0.65222000  | -7.12574800  | H | -2.88736500  | 1.47517200  | -7.19027400  |
| C  | -4.44723300 | -1.16232800 | -6.41817900  | H | -4.46414000  | 0.70090400  | -9.03855700  |
| C  | -4.31908900 | 0.21168300  | -8.08773500  | H | -8.83804600  | -4.70685000 | -3.80978900  |
| N  | -4.92342600 | -0.89344600 | -7.68771000  | H | -10.49584600 | -4.47272100 | -4.37415100  |
| C  | -9.56332600 | -3.95540800 | -4.12769600  | H | -7.05167700  | -4.02043000 | -5.88360500  |
| C  | -9.02751700 | -3.20138000 | -5.29357600  | H | -10.61865500 | -1.81225500 | -5.63452300  |
| N  | -9.70896800 | -2.15822300 | -5.90404600  | H | -9.25516900  | -0.90330200 | -7.60639700  |
| C  | -7.86821400 | -3.32751500 | -6.01091000  | H | -6.61004800  | 1.64405500  | -13.61683600 |
| C  | -8.96857300 | -1.70265700 | -6.94194800  | H | -6.75644800  | 0.36931700  | -17.23774400 |
| N  | -7.84615800 | -2.39598400 | -7.03181000  | H | -7.04721500  | -2.17552500 | -17.15527200 |
| C  | -6.95819100 | 2.60919600  | -10.69330100 | H | -6.55385600  | -3.12312100 | -14.85704300 |
| N  | -7.27562500 | 1.51204600  | -9.80597200  | H | -0.95158000  | -2.93776800 | -9.89540200  |
| C  | -6.99974400 | 0.21095000  | -10.11362400 | H | 0.08643100   | -2.77189300 | -11.31359100 |
| O  | -6.25310500 | 0.02051100  | -11.13722300 | H | -3.60218700  | -2.89116800 | -10.52870600 |
| O  | -7.45863600 | -0.67965800 | -9.33234300  | H | -1.06530200  | -0.73939300 | -13.08576600 |
| C  | -5.99742500 | 1.45357800  | -14.50229300 | H | -3.43863300  | -0.46555500 | -13.96358200 |
| C  | -6.28460300 | 0.09942700  | -15.07018200 | H | -5.94312100  | 2.49317800  | -11.07541900 |
| N  | -6.23691600 | -1.06654200 | -14.31122100 | H | -2.20318500  | -4.90620900 | -7.71250500  |
| C  | -6.61121000 | -0.23620400 | -16.35754100 | H | -2.49539600  | -3.25418400 | -7.11214200  |
| C  | -6.51897000 | -2.07611600 | -15.13009500 | H | -9.75871800  | -3.29862600 | -3.27215700  |
| N  | -6.74826300 | -1.61063800 | -16.37369500 | H | -4.94936400  | 1.55320400  | -14.19595900 |
| C  | -0.67058800 | -2.26303000 | -10.70606800 | H | -6.20360100  | 2.23037900  | -15.24201800 |
| C  | -1.88338500 | -1.91857100 | -11.49413200 | H | -7.01965400  | 3.54848900  | -10.13808100 |
| N  | -1.87932200 | -1.13592800 | -12.63914100 | H | -7.64071200  | 2.67332400  | -11.55118200 |
| C  | -3.19589700 | -2.24477800 | -11.29235500 | H | -2.98359500  | -0.92338600 | -4.12838600  |
| C  | -3.15428800 | -1.01452100 | -13.07962500 | H | -3.15905200  | -4.62670600 | -6.22479900  |
| N  | -3.97608600 | -1.67288400 | -12.27762200 | H | -0.19969400  | -1.37670300 | -10.26451100 |
| C  | -2.92951900 | -4.25382000 | -7.22607700  | H | -7.93987500  | 1.65321600  | -9.06102900  |
| C  | -4.19917700 | -4.13460600 | -8.06680800  | C | -15.72461000 | -5.23248800 | -8.59995500  |
| O  | -5.24710800 | -3.68013100 | -7.48152600  | C | -14.28163200 | -5.20645900 | -8.07990100  |
| O  | -4.14204600 | -4.42461900 | -9.28682200  | C | -14.20126000 | -4.95693300 | -6.55804200  |
| Zn | -6.37415000 | -2.18941300 | -8.42166800  | C | -12.78065200 | -5.17010500 | -6.02158000  |
| Zn | -5.99534000 | -1.54302600 | -12.30912500 | C | -14.71924700 | -3.56468900 | -6.16465000  |
| H  | -1.65424500 | -0.15178700 | -4.99913800  | C | -8.21561700  | -7.89747900 | -4.42193200  |

|   |              |              |              |   |              |             |              |
|---|--------------|--------------|--------------|---|--------------|-------------|--------------|
| C | -8.75824200  | -7.64241400  | -5.82297400  | H | -12.11839000 | -5.15742700 | -16.78773000 |
| S | -10.26601600 | -8.66811100  | -6.13253500  | H | -9.43183500  | -1.84683600 | -14.26275000 |
| C | -9.25390200  | -9.76534600  | -11.69087500 | H | -10.14175200 | -5.90201700 | -15.48514800 |
| C | -8.83949300  | -9.52159700  | -10.24154700 | H | -8.19965700  | -3.73565400 | -13.49594100 |
| O | -9.49966400  | -8.79348800  | -9.48319400  | H | -11.88025800 | -1.58511900 | -18.62861100 |
| C | -10.38218400 | -8.81421300  | -12.11051600 | H | -12.23711300 | -3.26812300 | -19.03167400 |
| C | -10.79661100 | -9.01560100  | -13.55996000 | H | -13.49957500 | -2.03547300 | -19.18972800 |
| O | -10.05047500 | -8.77918600  | -14.51064100 | N | -6.99231200  | -5.05319100 | -11.51280000 |
| N | -12.05902400 | -9.47448800  | -13.75919900 | C | -7.59611800  | -6.20283200 | -11.07120500 |
| N | -7.73363900  | -10.17114500 | -9.81762400  | O | -7.34791000  | -7.30985000 | -11.58977000 |
| C | -7.14862000  | -9.92147200  | -8.50393100  | N | -8.48662900  | -6.08526200 | -10.05722300 |
| H | -13.79803700 | -6.16537400  | -8.30523400  | C | -8.73303800  | -4.84186600 | -9.34024300  |
| H | -13.70373400 | -4.43479400  | -8.60871400  | C | -8.69073000  | -3.67231600 | -10.34406400 |
| H | -14.84940700 | -5.70315800  | -6.07494400  | C | -7.34847700  | -3.70796900 | -11.12243100 |
| H | -12.39528300 | -6.16651100  | -6.26103400  | O | -7.33027100  | -2.89023600 | -12.20580800 |
| H | -12.75872100 | -5.05916000  | -4.93067000  | H | -7.93071400  | -4.68672600 | -8.60424400  |
| H | -12.08999200 | -4.43251700  | -6.45024600  | H | -8.67718100  | -2.73638100 | -9.78095000  |
| H | -14.65775200 | -3.41465500  | -5.08098800  | H | -6.45554000  | -5.13353400 | -12.38081800 |
| H | -14.12321300 | -2.77746900  | -6.64590400  | H | -8.88824600  | -6.96025300 | -9.72832500  |
| H | -15.76194000 | -3.41183200  | -6.45599500  | O | -6.27595800  | -3.22962600 | -10.18472800 |
| H | -16.22220200 | -4.26506200  | -8.48345500  | H | -5.56366600  | -3.92126700 | -10.01166600 |
| H | -9.00840900  | -6.58513500  | -5.95058100  | C | -9.90264600  | -3.63842700 | -11.28188100 |
| H | -8.01203900  | -7.89906200  | -6.57724900  | H | -10.82462700 | -3.50679000 | -10.70978700 |
| H | -10.12736900 | -8.73889100  | -7.47593000  | H | -9.82190500  | -2.79832900 | -11.97099500 |
| H | -8.96392800  | -7.67147300  | -3.65495400  | H | -9.99584100  | -4.55358600 | -11.87094800 |
| H | -10.01849100 | -7.78758100  | -12.02052000 | C | -4.82810800  | -9.59760900 | -11.88554500 |
| H | -11.23103700 | -8.92256400  | -11.43012900 | C | -4.66453100  | -9.03632500 | -13.28699600 |
| H | -12.69459700 | -9.65740500  | -13.00052000 | O | -3.92409400  | -9.57758600 | -14.10802100 |
| H | -12.37173700 | -9.61982100  | -14.70785400 | N | -5.36656400  | -7.89765600 | -13.51642800 |
| H | -8.39120800  | -9.61953500  | -12.34720800 | C | -5.46086100  | -7.29770800 | -14.83257900 |
| H | -7.91227100  | -10.03168200 | -7.73223000  | C | -4.87865200  | -5.87906500 | -14.77932500 |
| H | -6.71891800  | -8.91493700  | -8.44457000  | O | -5.41519200  | -5.00562800 | -14.06710800 |
| H | -7.15803000  | -10.62263500 | -10.51311300 | C | -6.92747000  | -7.25666900 | -15.30846000 |
| H | -9.57166300  | -10.81178900 | -11.79022700 | O | -7.39277300  | -8.57962900 | -15.42130700 |
| H | -6.35985500  | -10.65439800 | -8.32705600  | N | -3.78965800  | -5.57800200 | -15.52004100 |
| H | -7.91982700  | -8.94268700  | -4.29749900  | C | -2.97621800  | -6.48485400 | -16.37480200 |
| H | -7.33776200  | -7.26915100  | -4.23152200  | C | -2.06137000  | -7.39288100 | -15.54607600 |
| H | -16.31988900 | -5.97992300  | -8.06376600  | C | -2.20817900  | -5.47713300 | -17.25220100 |
| H | -15.75789400 | -5.48676200  | -9.66452500  | C | -1.94968800  | -4.29369400 | -16.30644000 |
| C | -12.65108500 | -2.36154800  | -18.57849700 | C | -3.23920200  | -4.21224900 | -15.47625400 |
| C | -13.07419200 | -2.61924800  | -17.12387100 | H | -3.08016700  | -3.90063800 | -14.44004700 |
| C | -11.91227300 | -3.07547700  | -16.27198900 | H | -3.96271800  | -3.51297200 | -15.91450300 |
| C | -11.14026900 | -2.16309900  | -15.54617500 | H | -1.09231200  | -4.50613300 | -15.65990400 |
| C | -11.52886300 | -4.42468300  | -16.24115000 | H | -1.73942000  | -3.36095500 | -16.83723300 |
| C | -10.01664400 | -2.56977100  | -14.82485500 | H | -1.29334000  | -5.90884400 | -17.66525100 |
| C | -10.41712000 | -4.85244900  | -15.52393300 | H | -2.83705200  | -5.15674600 | -18.09087800 |
| C | -9.64697900  | -3.92146300  | -14.81309600 | H | -3.64085300  | -7.09719500 | -16.99005500 |
| O | -8.55549400  | -4.38559400  | -14.14838200 | H | -1.41070300  | -6.80367700 | -14.89050200 |
| H | -13.86825300 | -3.37562700  | -17.10731800 | H | -2.63115700  | -8.10199200 | -14.94271300 |
| H | -13.50863400 | -1.70437900  | -16.70334500 | H | -1.42246500  | -7.97566700 | -16.21905200 |
| H | -11.41894100 | -1.11136200  | -15.54374200 | H | -4.89954600  | -7.94395200 | -15.50697500 |

H -8.29428100 -8.62598400 -15.05828700  
H -6.95933800 -6.73438800 -16.28168300  
H -7.51734800 -6.65851300 -14.60554700  
H -6.05020500 -7.59809900 -12.81602300  
H -3.85054700 -9.60726600 -11.39417400  
H -5.53473800 -9.02869700 -11.27924200

H -5.14740700 -10.64188700 -11.97165800  
C -10.05121000 -4.95790900 -8.57787700  
H -10.00080700 -5.75985600 -7.83673000  
H -10.27154400 -4.02491000 -8.05277700  
H -10.88327300 -5.18172000 -9.24932500

**(5S,6R)-Me<sub>2</sub>DHU-TS2-II (SkDHPase)**

C -2.73099200 -0.10103300 -4.80017500  
C -3.53692200 -0.24260200 -6.04830800  
N -3.38485500 0.54428800 -7.18339000  
C -4.52130600 -1.13164300 -6.37690100  
C -4.25460300 0.11240500 -8.13129400  
N -4.95526100 -0.91101300 -7.67244400  
C -9.56333400 -3.95541100 -4.12770600  
C -9.01978900 -3.16142500 -5.25784100  
N -9.70669900 -2.11294100 -5.85064300  
C -7.85978300 -3.27082600 -5.97364900  
C -8.96979900 -1.63964900 -6.88187900  
N -7.84382400 -2.32741700 -6.98236200  
C -6.95819100 2.60919600 -10.69330100  
N -7.40437600 1.55644600 -9.81737400  
C -7.08099100 0.25233000 -10.02000200  
O -6.21870600 0.00717400 -10.93666600  
O -7.61643100 -0.60043900 -9.24389600  
C -5.99742500 1.45357700 -14.50229300  
C -6.29045400 0.07590900 -15.00606600  
N -6.26961400 -1.05762500 -14.19635000  
C -6.60375800 -0.30833000 -16.28312300  
C -6.55410800 -2.09523600 -14.97898000  
N -6.76001800 -1.67990600 -16.24428900  
C -0.67058800 -2.26302900 -10.70606900  
C -1.89666000 -1.92494300 -11.47600600  
N -1.90298400 -1.32673100 -12.72701000  
C -3.21554700 -2.11161600 -11.17162400  
C -3.19026400 -1.18039600 -13.12612000  
N -4.00892200 -1.64625900 -12.19782300  
C -2.92951400 -4.25382000 -7.22607300  
C -4.23647400 -4.14164900 -7.98623900  
O -5.25607600 -3.69369200 -7.41028700  
O -4.19782700 -4.44347200 -9.23949100  
Zn -6.47091900 -2.10025000 -8.45843900  
Zn -6.03696500 -1.53721800 -12.16488900  
H -1.66181600 -0.25717000 -4.98329500  
H -2.84921600 0.88748700 -4.34221900  
H -4.92350500 -1.93626100 -5.78560900  
H -2.74082600 1.31461800 -7.28905400  
H -4.34942600 0.54316400 -9.11683600  
H -8.84519900 -4.72345400 -3.83454100  
H -10.49661700 -4.45710300 -4.40354900  
H -7.04717100 -3.96965200 -5.85788900

H -10.61647200 -1.77276700 -5.57432500  
H -9.26025800 -0.83513700 -7.53777000  
H -6.69961600 1.74664100 -13.71582800  
H -6.72922500 0.26290200 -17.18897700  
H -7.05760000 -2.27408600 -17.00433000  
H -6.59827800 -3.13120300 -14.67018000  
H -0.95358900 -2.77476800 -9.78440600  
H -0.00711600 -2.93353800 -11.26383600  
H -3.62906200 -2.59895700 -10.30717800  
H -1.09007100 -1.06373900 -13.26502400  
H -3.48728400 -0.75326200 -14.07098100  
H -5.92569200 2.42528900 -10.99066600  
H -2.23556900 -4.93108700 -7.72548300  
H -2.48345400 -3.25409000 -7.17885900  
H -9.76444800 -3.33493600 -3.24661500  
H -4.98963900 1.52402400 -14.07721800  
H -6.07209700 2.18004200 -15.31461400  
H -7.00826900 3.56610400 -10.16693100  
H -7.56606700 2.69106200 -11.60452200  
H -3.05692300 -0.84581300 -4.07185600  
H -3.10994000 -4.58308500 -6.20089200  
H -0.09035500 -1.37252900 -10.43654900  
H -8.13068300 1.73540900 -9.14212300  
C -15.72460500 -5.23249200 -8.59995500  
C -14.28163400 -5.20645300 -8.07989200  
C -14.19338300 -5.09085800 -6.54265800  
C -12.77879700 -5.40091100 -6.03541600  
C -14.65766000 -3.71765600 -6.03454600  
C -8.21561800 -7.89747800 -4.42193400  
C -9.09632400 -7.77438900 -5.66147100  
S -10.15081700 -9.27519000 -5.90013800  
C -9.35140600 -9.66407600 -11.61365400  
C -8.88616500 -9.45752100 -10.17304900  
O -9.52346900 -8.75614300 -9.37004900  
C -10.23553200 -8.49926800 -12.08628300  
C -10.80863800 -8.74403800 -13.47233700  
O -10.14694000 -8.62441000 -14.50486500  
N -12.11094300 -9.12732200 -13.51749500  
N -7.76941000 -10.12212200 -9.80856600  
C -7.14862000 -9.92147200 -8.50393100  
H -13.77312300 -6.12727200 -8.39355000  
H -13.72796600 -4.37593300 -8.54087900  
H -14.86731100 -5.85021100 -6.11951800



|   |              |              |              |   |              |              |              |
|---|--------------|--------------|--------------|---|--------------|--------------|--------------|
| H | -12.45030500 | -6.40131200  | -6.33625000  | C | -7.31034600  | -3.67236500  | -10.99871100 |
| H | -12.73568700 | -5.35350600  | -4.94079000  | O | -7.38442400  | -2.87506100  | -12.11132300 |
| H | -12.05644800 | -4.67861400  | -6.43618600  | H | -7.75381500  | -4.58582800  | -8.46273200  |
| H | -14.61300300 | -3.66577200  | -4.94113300  | H | -8.71914300  | -2.76727900  | -9.68622900  |
| H | -14.01806900 | -2.91938300  | -6.43472700  | H | -6.42014900  | -5.08166500  | -12.30048500 |
| H | -15.68629400 | -3.49347400  | -6.33032000  | H | -8.66051200  | -6.96768000  | -9.53495700  |
| H | -16.26151100 | -4.30615300  | -8.37302800  | O | -6.26379100  | -3.13241500  | -10.13433100 |
| H | -9.74716800  | -6.89938400  | -5.58250300  | H | -5.25412500  | -3.94292000  | -9.75985100  |
| H | -8.48178500  | -7.66166800  | -6.55764600  | C | -9.87764700  | -3.84370900  | -11.11979600 |
| H | -10.22264200 | -9.17631700  | -7.24607300  | H | -10.79694600 | -3.79825900  | -10.52913100 |
| H | -8.81433900  | -8.03632100  | -3.51590300  | H | -9.90370900  | -3.01690200  | -11.82940600 |
| H | -9.61777700  | -7.60096400  | -12.14363700 | H | -9.88473800  | -4.77644300  | -11.68823800 |
| H | -11.02457000 | -8.32621700  | -11.34951000 | C | -4.82810800  | -9.59760900  | -11.88554500 |
| H | -12.68154200 | -9.19796600  | -12.69134300 | C | -4.67411200  | -9.03093900  | -13.28631200 |
| H | -12.52611500 | -9.31213700  | -14.41868000 | O | -3.94484500  | -9.57322700  | -14.11760300 |
| H | -8.49186300  | -9.76788300  | -12.28223100 | N | -5.37583100  | -7.89110600  | -13.50716400 |
| H | -7.88313500  | -10.07534900 | -7.71160500  | C | -5.48687300  | -7.29496900  | -14.82299000 |
| H | -6.73233700  | -8.91123800  | -8.41491100  | C | -4.88805100  | -5.88272100  | -14.78852100 |
| H | -7.20351700  | -10.52378000 | -10.54144700 | O | -5.40405100  | -4.99883600  | -14.07585500 |
| H | -9.91143800  | -10.60838500 | -11.65048400 | C | -6.96102300  | -7.22989000  | -15.27151100 |
| H | -6.34348700  | -10.64841900 | -8.38497400  | O | -7.45717000  | -8.54344700  | -15.35444700 |
| H | -7.53281400  | -8.74750000  | -4.50390600  | N | -3.80868200  | -5.59844600  | -15.55214600 |
| H | -7.61464500  | -6.98971800  | -4.29161000  | C | -3.00048900  | -6.52399900  | -16.39045700 |
| H | -16.28597000 | -6.06002900  | -8.15237600  | C | -2.06137000  | -7.39288100  | -15.54607600 |
| H | -15.75167100 | -5.36411600  | -9.68655400  | C | -2.26113200  | -5.53753000  | -17.31447900 |
| C | -12.65108500 | -2.36154800  | -18.57849700 | C | -1.99128700  | -4.32406200  | -16.41034100 |
| C | -13.04779400 | -2.52643600  | -17.10209900 | C | -3.25698100  | -4.23336300  | -15.54343800 |
| C | -11.89792400 | -2.99789900  | -16.23931400 | H | -3.06538100  | -3.90800400  | -14.51674900 |
| C | -11.15406000 | -2.10788400  | -15.45860500 | H | -3.99486300  | -3.54002400  | -15.96684200 |
| C | -11.51228800 | -4.34769700  | -16.23164000 | H | -1.11175400  | -4.50696500  | -15.78456400 |
| C | -10.05755400 | -2.53452400  | -14.70547800 | H | -1.80883800  | -3.40485000  | -16.97413500 |
| C | -10.42700600 | -4.79487800  | -15.48676300 | H | -1.35181200  | -5.97320600  | -17.73556500 |
| C | -9.68421000  | -3.88539900  | -14.71912100 | H | -2.91183500  | -5.24769200  | -18.14747100 |
| O | -8.61882000  | -4.36989900  | -14.02852700 | H | -3.66743100  | -7.16520500  | -16.97237800 |
| H | -13.87912900 | -3.23927100  | -17.03301500 | H | -1.41207800  | -6.77436800  | -14.91667100 |
| H | -13.42838200 | -1.57187100  | -16.71963300 | H | -2.61703600  | -8.09083400  | -14.91685900 |
| H | -11.43478500 | -1.05697100  | -15.43423800 | H | -1.42207500  | -7.98763600  | -16.20807800 |
| H | -12.08056000 | -5.06650200  | -16.81798900 | H | -4.94671400  | -7.95130700  | -15.50501200 |
| H | -9.49705900  | -1.82794400  | -14.09944900 | H | -8.37398700  | -8.55124900  | -15.02577400 |
| H | -10.15320100 | -5.84535600  | -15.46763500 | H | -6.99889200  | -6.71902800  | -16.25116700 |
| H | -8.26120200  | -3.72613800  | -13.36642400 | H | -7.52305500  | -6.60738900  | -14.56620900 |
| H | -11.84746600 | -1.62540100  | -18.68738800 | H | -6.03615700  | -7.57832200  | -12.78918200 |
| H | -12.29156700 | -3.30751400  | -18.99627000 | H | -3.83874700  | -9.66858800  | -11.42408100 |
| H | -13.50082400 | -2.02723400  | -19.18326700 | H | -5.48715200  | -8.99899600  | -11.25501500 |
| N | -6.91299600  | -5.01492500  | -11.40827500 | H | -5.20627300  | -10.62232400 | -11.97365300 |
| C | -7.42996200  | -6.18094000  | -10.92034300 | C | -9.82890300  | -5.06487500  | -8.33851500  |
| O | -7.20081300  | -7.28657600  | -11.45736000 | H | -9.62271500  | -5.82757600  | -7.58500700  |
| N | -8.21874000  | -6.09809100  | -9.82089800  | H | -10.13277000 | -4.14549200  | -7.83298800  |
| C | -8.56106600  | -4.84589100  | -9.16040800  | H | -10.65690500 | -5.41601500  | -8.95824300  |
| C | -8.65023100  | -3.72384200  | -10.21047300 |   |              |              |              |

**(5S,6R)-Me<sub>2</sub>DHU-INT2-II (SkDHPase)**

|    |              |             |              |   |              |              |              |
|----|--------------|-------------|--------------|---|--------------|--------------|--------------|
| C  | -2.73099200  | -0.10103300 | -4.80017700  | H | -0.95157600  | -2.62745000  | -9.71628800  |
| C  | -3.54193900  | -0.26663600 | -6.04407000  | H | -0.08323600  | -3.05073300  | -11.19136200 |
| N  | -3.39090700  | 0.50482800  | -7.18980700  | H | -3.64021800  | -2.35558300  | -10.20331900 |
| C  | -4.52895800  | -1.15915600 | -6.36032900  | H | -1.09187300  | -1.33268900  | -13.36906800 |
| C  | -4.26187500  | 0.06272400  | -8.13099600  | H | -3.48931500  | -0.98161400  | -14.15967100 |
| N  | -4.96401800  | -0.95462600 | -7.65908000  | H | -5.92032300  | 2.41880600   | -10.96679500 |
| C  | -9.56333100  | -3.95540800 | -4.12770100  | H | -2.23683400  | -4.88658300  | -7.78242200  |
| C  | -9.02912100  | -3.15350300 | -5.25389200  | H | -2.50225700  | -3.24904600  | -7.13533700  |
| N  | -9.70740700  | -2.08942400 | -5.82746200  | H | -9.70676100  | -3.35100200  | -3.22318700  |
| C  | -7.87417400  | -3.26576600 | -5.97563000  | H | -4.98405600  | 1.52489500   | -14.09091800 |
| C  | -8.97040100  | -1.61084500 | -6.85612900  | H | -6.08150600  | 2.17470000   | -15.31854800 |
| N  | -7.85198700  | -2.30918900 | -6.97124000  | H | -7.01548700  | 3.57140300   | -10.17717300 |
| C  | -6.95819100  | 2.60919700  | -10.69330100 | H | -7.54603500  | 2.68553200   | -11.61796400 |
| N  | -7.42612800  | 1.56674500  | -9.81883900  | H | -3.05201800  | -0.83341900  | -4.05709400  |
| C  | -7.09118500  | 0.26340100  | -9.99783300  | H | -3.07657700  | -4.64419200  | -6.21774600  |
| O  | -6.20209300  | 0.00803200  | -10.88610800 | H | -0.01458700  | -1.39443400  | -10.57418100 |
| O  | -7.64431000  | -0.58188400 | -9.22613300  | H | -8.17203300  | 1.75019000   | -9.16651900  |
| C  | -5.99742500  | 1.45357800  | -14.50229300 | C | -15.72461000 | -5.23247300  | -8.59996000  |
| C  | -6.29788600  | 0.07317200  | -14.99293600 | C | -14.28162800 | -5.20647800  | -8.07989000  |
| N  | -6.27611300  | -1.05393400 | -14.17411600 | C | -14.18877400 | -5.18346100  | -6.53914500  |
| C  | -6.61745300  | -0.32051500 | -16.26545700 | C | -12.76632300 | -5.49608400  | -6.05418200  |
| C  | -6.56552200  | -2.09737600 | -14.94760900 | C | -14.67661600 | -3.85232800  | -5.94774700  |
| N  | -6.77513400  | -1.69167800 | -16.21532200 | C | -8.21561800  | -7.89747500  | -4.42193400  |
| C  | -0.67058800  | -2.26303000 | -10.70606800 | C | -9.02302100  | -7.81134000  | -5.71349000  |
| C  | -1.89768300  | -1.93232300 | -11.47631600 | S | -10.10740600 | -9.29351900  | -5.92367300  |
| N  | -1.90403700  | -1.48547000 | -12.78898500 | C | -9.34683900  | -9.65219900  | -11.61776100 |
| C  | -3.21622000  | -2.00308100 | -11.12577800 | C | -8.88624900  | -9.45643700  | -10.17371200 |
| C  | -3.19109700  | -1.31335100 | -13.17777900 | O | -9.53068500  | -8.76660200  | -9.36656900  |
| N  | -4.00841900  | -1.62022100 | -12.18531300 | C | -10.23883000 | -8.48833400  | -12.07927500 |
| C  | -2.92951800  | -4.25382000 | -7.22607600  | C | -10.83772400 | -8.73547900  | -13.45374600 |
| C  | -4.25960700  | -4.12832300 | -7.93597800  | O | -10.20610500 | -8.58801100  | -14.50178100 |
| O  | -5.27972900  | -3.77078000 | -7.32547100  | N | -12.12936100 | -9.15559700  | -13.47094800 |
| O  | -4.22848900  | -4.33083100 | -9.22432400  | N | -7.76820700  | -10.11972200 | -9.81031600  |
| Zn | -6.50823200  | -2.09284900 | -8.47235700  | C | -7.14862100  | -9.92147200  | -8.50393100  |
| Zn | -6.03114900  | -1.52223500 | -12.14068200 | H | -13.75282800 | -6.09432100  | -8.45125500  |
| H  | -1.66221100  | -0.25775200 | -4.98538400  | H | -13.74802300 | -4.33687700  | -8.49069100  |
| H  | -2.85069800  | 0.89522200  | -4.36055700  | H | -14.84673000 | -5.97982400  | -6.16106100  |
| H  | -4.93598500  | -1.95271700 | -5.75698800  | H | -12.41788300 | -6.46946900  | -6.41515300  |
| H  | -2.74723000  | 1.27408100  | -7.30573000  | H | -12.72196200 | -5.51461000  | -4.95920500  |
| H  | -4.35965500  | 0.48184000  | -9.12155100  | H | -12.05880900 | -4.73724100  | -6.41057800  |
| H  | -8.86552200  | -4.75741700 | -3.88068900  | H | -14.62880100 | -3.86546800  | -4.85328900  |
| H  | -10.52770900 | -4.41279700 | -4.37292000  | H | -14.05307400 | -3.01966000  | -6.30047500  |
| H  | -7.06981700  | -3.97483800 | -5.86974600  | H | -15.71028700 | -3.62954000  | -6.22665000  |
| H  | -10.61179700 | -1.74268000 | -5.54197300  | H | -16.28280600 | -4.33693600  | -8.31069200  |
| H  | -9.25701100  | -0.79670700 | -7.50159800  | H | -9.65286600  | -6.91719400  | -5.71056100  |
| H  | -6.68965600  | 1.75310900  | -13.70944500 | H | -8.36153600  | -7.75499400  | -6.58102800  |
| H  | -6.74564700  | 0.24394900  | -17.17516200 | H | -10.19568100 | -9.20601600  | -7.26986800  |
| H  | -7.08100900  | -2.29102000 | -16.96797800 | H | -8.86808100  | -7.97108800  | -3.54554400  |
| H  | -6.61225000  | -3.13093500 | -14.63117200 | H | -9.62266400  | -7.58979900  | -12.14699400 |

|   |              |              |              |   |              |              |              |
|---|--------------|--------------|--------------|---|--------------|--------------|--------------|
| H | -11.01591400 | -8.31550400  | -11.32971500 | O | -6.23429300  | -3.17345500  | -10.06502000 |
| H | -12.67776500 | -9.24777300  | -12.63194700 | H | -5.14424800  | -3.99640200  | -9.66629300  |
| H | -12.56080600 | -9.34569000  | -14.36332900 | C | -9.85050100  | -3.80294100  | -11.09533800 |
| H | -8.48575600  | -9.74310900  | -12.28631400 | H | -10.77852800 | -3.75014800  | -10.51927100 |
| H | -7.87602200  | -10.10248000 | -7.71088600  | H | -9.85319500  | -2.96755600  | -11.79505600 |
| H | -6.75526600  | -8.90311000  | -8.40498200  | H | -9.86258100  | -4.72899400  | -11.67443500 |
| H | -7.19812400  | -10.51144800 | -10.54531500 | C | -4.82810800  | -9.59760800  | -11.88554600 |
| H | -9.90050200  | -10.59990300 | -11.66402900 | C | -4.68481200  | -9.01937900  | -13.28147800 |
| H | -6.32658800  | -10.63116300 | -8.39736700  | O | -3.96378100  | -9.55584300  | -14.12385800 |
| H | -7.55823100  | -8.77091800  | -4.42256600  | N | -5.38672600  | -7.87683200  | -13.48693000 |
| H | -7.59209400  | -7.00350300  | -4.30291600  | C | -5.51588400  | -7.28564800  | -14.80365400 |
| H | -16.26477200 | -6.10159300  | -8.20714200  | C | -4.89998000  | -5.88073600  | -14.79180100 |
| H | -15.75127800 | -5.29278200  | -9.69266500  | O | -5.39541700  | -4.98311200  | -14.08307900 |
| C | -12.65108500 | -2.36154800  | -18.57849700 | C | -6.99716600  | -7.21005100  | -15.22291600 |
| C | -13.02136100 | -2.47181800  | -17.08978600 | O | -7.50204200  | -8.52194800  | -15.27938400 |
| C | -11.87062300 | -2.94404900  | -16.22718300 | N | -3.82684400  | -5.61844400  | -15.57375900 |
| C | -11.12675300 | -2.05638400  | -15.44376800 | C | -3.02779700  | -6.56257200  | -16.39910300 |
| C | -11.49248300 | -4.29617700  | -16.21120400 | C | -2.06137000  | -7.39288100  | -15.54607600 |
| C | -10.03873100 | -2.48693100  | -14.67977900 | C | -2.32050500  | -5.59874300  | -17.37018300 |
| C | -10.41583100 | -4.74691200  | -15.45609700 | C | -2.03289900  | -4.35951900  | -16.50670300 |
| C | -9.67309700  | -3.83994700  | -14.68467200 | C | -3.26962600  | -4.25629600  | -15.59875300 |
| O | -8.61572100  | -4.33070200  | -13.98608200 | H | -3.04074300  | -3.92024700  | -14.58291900 |
| H | -13.86845400 | -3.16152900  | -16.98417300 | H | -4.02005200  | -3.56490500  | -16.00258100 |
| H | -13.37298800 | -1.49733200  | -16.73060700 | H | -1.13041800  | -4.51808100  | -15.90731700 |
| H | -11.40137800 | -1.00376600  | -15.42431300 | H | -1.87832200  | -3.45394200  | -17.10012500 |
| H | -12.06097600 | -5.01468700  | -16.79769400 | H | -1.42027100  | -6.03997100  | -17.80487100 |
| H | -9.47955400  | -1.78083100  | -14.07197500 | H | -2.99651000  | -5.33575700  | -18.19173200 |
| H | -10.15035900 | -5.79937400  | -15.43025600 | H | -3.69916200  | -7.23032000  | -16.94439100 |
| H | -8.25788200  | -3.69634000  | -13.31400600 | H | -1.40952600  | -6.74682300  | -14.94793500 |
| H | -11.83464500 | -1.64671100  | -18.72685600 | H | -2.59966000  | -8.07724600  | -14.88784700 |
| H | -12.32079300 | -3.32740900  | -18.97430800 | H | -1.42617000  | -8.00033100  | -16.20049300 |
| H | -13.50636700 | -2.02760100  | -19.17557900 | H | -4.99590000  | -7.95257200  | -15.49110400 |
| N | -6.90853700  | -5.01804800  | -11.35535100 | H | -8.43194600  | -8.51157300  | -14.98768800 |
| C | -7.44283900  | -6.17847600  | -10.87991300 | H | -7.05031800  | -6.70835100  | -16.20679100 |
| O | -7.21835900  | -7.28518300  | -11.42053500 | H | -7.53963900  | -6.57607100  | -14.51229200 |
| N | -8.24344300  | -6.09530700  | -9.78622400  | H | -6.04643100  | -7.57353400  | -12.76371900 |
| C | -8.58574000  | -4.84312900  | -9.12477400  | H | -3.83545400  | -9.67667500  | -11.43260300 |
| C | -8.63471800  | -3.71096000  | -10.16702500 | H | -5.47995600  | -9.00192500  | -11.24452400 |
| C | -7.27781000  | -3.66412700  | -10.92873700 | H | -5.21115500  | -10.61992800 | -11.97935400 |
| O | -7.35097800  | -2.87020100  | -12.05250100 | C | -9.88741900  | -5.02236600  | -8.34709500  |
| H | -7.79375500  | -4.59958000  | -8.40459000  | H | -9.74635200  | -5.72882700  | -7.52625900  |
| H | -8.70525800  | -2.76057800  | -9.63206700  | H | -10.21305300 | -4.06778700  | -7.92316300  |
| H | -6.41074700  | -5.08344800  | -12.24332600 | H | -10.68737500 | -5.40435200  | -8.98580500  |
| H | -8.69889600  | -6.96197300  | -9.51318500  |   |              |              |              |

**(5S,6R)-Me<sub>2</sub>DHU-TS3-II (SkDHPase)**

|   |             |             |             |   |             |             |             |
|---|-------------|-------------|-------------|---|-------------|-------------|-------------|
| C | -2.73099300 | -0.10103300 | -4.80017800 | C | -4.68202500 | 0.41380300  | -7.85317400 |
| C | -3.62974000 | -0.18361500 | -5.98236800 | N | -5.06978200 | -0.82410900 | -7.59344300 |
| N | -3.80754000 | 0.83534700  | -6.90653700 | C | -9.56333000 | -3.95541300 | -4.12770500 |
| C | -4.42687200 | -1.19909300 | -6.42828300 | C | -9.03603100 | -3.17371900 | -5.27439800 |

|    |              |             |              |   |              |              |              |
|----|--------------|-------------|--------------|---|--------------|--------------|--------------|
| N  | -9.74317400  | -2.14996800 | -5.88586400  | C | -15.72463000 | -5.23247500  | -8.59996600  |
| C  | -7.86942800  | -3.26574400 | -5.98269600  | C | -14.28160700 | -5.20647300  | -8.07988100  |
| C  | -9.01110900  | -1.67372100 | -6.91954500  | C | -14.18292200 | -5.09241800  | -6.54415500  |
| N  | -7.86942100  | -2.33708400 | -7.00478900  | C | -12.76443400 | -5.40883900  | -6.05162700  |
| C  | -6.95819100  | 2.60919500  | -10.69330000 | C | -14.63741900 | -3.71787900  | -6.03141300  |
| N  | -7.24890400  | 1.60357300  | -9.70311200  | C | -8.21562200  | -7.89747200  | -4.42193100  |
| C  | -7.27520000  | 0.28028100  | -10.07628200 | C | -9.10446400  | -7.80343300  | -5.65708300  |
| O  | -6.80804000  | 0.03748800  | -11.23693800 | S | -10.15485200 | -9.31337400  | -5.83559700  |
| O  | -7.71774200  | -0.54225000 | -9.21880200  | C | -10.11700000 | -10.30197100 | -10.8794700  |
| C  | -5.99742500  | 1.45357400  | -14.50229300 | C | -9.19160200  | -9.67550000  | -9.84473200  |
| C  | -6.23035600  | 0.05716300  | -14.99435600 | O | -9.49529500  | -8.61166500  | -9.27472700  |
| N  | -6.22178400  | -1.07148400 | -14.17539100 | C | -10.60021800 | -9.29970200  | -11.92981000 |
| C  | -6.46923600  | -0.34234600 | -16.28347700 | C | -9.58407700  | -9.08644300  | -13.05107900 |
| C  | -6.44021000  | -2.11638800 | -14.96479400 | O | -8.44069900  | -9.55040400  | -12.99395700 |
| N  | -6.59322700  | -1.71668200 | -16.24451600 | N | -10.02425300 | -8.37387700  | -14.11312400 |
| C  | -0.67058700  | -2.26303000 | -10.70606800 | N | -8.09073800  | -10.37652700 | -9.51911200  |
| C  | -1.92882500  | -1.86265200 | -11.39257700 | C | -7.14861700  | -9.92147700  | -8.50393100  |
| N  | -1.96002500  | -1.01795200 | -12.49216300 | H | -13.77415200 | -6.12666800  | -8.39734100  |
| C  | -3.24100200  | -2.17304200 | -11.15031500 | H | -13.72869900 | -4.37603600  | -8.54225300  |
| C  | -3.25021600  | -0.85070700 | -12.86917200 | H | -14.85565000 | -5.84971600  | -6.11548900  |
| N  | -4.04980600  | -1.53483400 | -12.06997100 | H | -12.44545800 | -6.41146500  | -6.35554900  |
| Zn | -6.47527700  | -2.05998300 | -8.45625400  | H | -12.70866100 | -5.36159700  | -4.95755900  |
| Zn | -6.10045200  | -1.58760700 | -12.09828400 | H | -12.04078100 | -4.69144700  | -6.45980400  |
| H  | -1.68523200  | 0.05689000  | -5.08825200  | H | -14.58717900 | -3.66757100  | -4.93818800  |
| H  | -3.01432500  | 0.71256300  | -4.12261100  | H | -13.99609600 | -2.92216800  | -6.43400800  |
| H  | -4.58052100  | -2.17763800 | -6.00719400  | H | -15.66637700 | -3.48841700  | -6.32203500  |
| H  | -3.37094300  | 1.74520300  | -6.87816200  | H | -16.26360200 | -4.30846200  | -8.36795800  |
| H  | -5.03348500  | 1.02822700  | -8.66822000  | H | -9.75995600  | -6.93097600  | -5.58974900  |
| H  | -8.84390800  | -4.72497300 | -3.84134600  | H | -8.50274600  | -7.70906100  | -6.56370400  |
| H  | -10.50583200 | -4.45410500 | -4.37584700  | H | -10.39405800 | -9.14855400  | -7.15417400  |
| H  | -7.04100700  | -3.94369000 | -5.85323200  | H | -8.80800800  | -8.01117200  | -3.50839000  |
| H  | -10.66111700 | -1.82536400 | -5.61833800  | H | -10.80531800 | -8.33920800  | -11.44242800 |
| H  | -9.31287400  | -0.88227800 | -7.58644000  | H | -11.54388000 | -9.63993600  | -12.37086000 |
| H  | -6.68130000  | 1.69717100  | -13.68441900 | H | -10.94734500 | -7.97270100  | -14.14133300 |
| H  | -6.56243900  | 0.22094700  | -17.19827300 | H | -9.36997900  | -8.21579300  | -14.87851100 |
| H  | -6.84129100  | -2.32021200 | -17.01436600 | H | -9.64383700  | -11.15799200 | -11.36659100 |
| H  | -6.48912200  | -3.14785000 | -14.64507300 | H | -7.66653300  | -9.78046800  | -7.55261000  |
| H  | -0.89974000  | -2.97449500 | -9.91037400  | H | -6.67142600  | -8.98581100  | -8.81015500  |
| H  | 0.03369800   | -2.74959100 | -11.39036700 | H | -7.83151600  | -11.15253600 | -10.10912100 |
| H  | -3.65601400  | -2.83995400 | -10.41109200 | H | -10.98318700 | -10.67309800 | -10.3190230  |
| H  | -1.15746700  | -0.60852500 | -12.94774000 | H | -6.38142700  | -10.68659400 | -8.37628000  |
| H  | -3.55969200  | -0.25851500 | -13.71548700 | H | -7.53399100  | -8.75029100  | -4.48652600  |
| H  | -5.98762200  | 2.41493900  | -11.15270900 | H | -7.61108400  | -6.98884100  | -4.32025800  |
| H  | -9.74167100  | -3.32584600 | -3.24787300  | H | -16.28450900 | -6.06364100  | -8.15735300  |
| H  | -4.97842700  | 1.59152000  | -14.12116400 | H | -15.75047300 | -5.35854500  | -9.68716400  |
| H  | -6.14986200  | 2.17094500  | -15.31179700 | C | -12.65108500 | -2.36154800  | -18.57849700 |
| H  | -6.92270000  | 3.58930000  | -10.20937300 | C | -12.92412300 | -2.48495100  | -17.07018100 |
| H  | -7.70601600  | 2.64943900  | -11.49585500 | C | -11.73396300 | -2.99050800  | -16.28109500 |
| H  | -2.78279300  | -1.03430800 | -4.23638200  | C | -11.04854500 | -2.17657600  | -15.37357000 |
| H  | -0.15695200  | -1.40560100 | -10.25537700 | C | -11.26744800 | -4.30382400  | -16.44987700 |
| H  | -7.84356400  | 1.84094400  | -8.92296500  | C | -9.94341000  | -2.64020600  | -14.65381800 |

|   |              |             |              |   |              |              |              |
|---|--------------|-------------|--------------|---|--------------|--------------|--------------|
| C | -10.17046500 | -4.78343900 | -15.74437600 | H | -4.83105000  | -7.89887500  | -15.50774900 |
| C | -9.49718200  | -3.95711500 | -14.83029600 | H | -7.42959700  | -8.84479100  | -14.62177300 |
| O | -8.43049800  | -4.48703500 | -14.18134400 | H | -6.82999800  | -6.63760500  | -16.30940700 |
| H | -13.77832800 | -3.15829200 | -16.91936300 | H | -7.38480600  | -6.45818400  | -14.63923700 |
| H | -13.23273700 | -1.50982700 | -16.67586200 | H | -5.91431600  | -7.56441900  | -12.76448700 |
| H | -11.38395100 | -1.15338200 | -15.21898800 | H | -4.44560300  | -8.85521600  | -11.17058100 |
| H | -11.77790900 | -4.96670100 | -17.14507400 | H | -5.86708700  | -9.76822000  | -11.65904700 |
| H | -9.42845100  | -1.98698000 | -13.95551800 | H | -4.24323000  | -10.52146800 | -11.78396800 |
| H | -9.81834500  | -5.80086000 | -15.88167200 | C | -2.97579400  | -4.24489600  | -7.22764600  |
| H | -8.08844400  | -3.94050300 | -13.42057600 | C | -4.27623400  | -4.27792600  | -8.04334700  |
| H | -11.83193300 | -1.66121000 | -18.77249900 | O | -5.30850100  | -3.74869100  | -7.55815400  |
| H | -12.37043600 | -3.32680900 | -19.01193000 | O | -4.19410400  | -4.82281900  | -9.20169500  |
| H | -13.53793500 | -2.00199000 | -19.11053900 | N | -6.32947000  | -5.02148000  | -10.89380000 |
| C | -4.81204700  | -9.59659100 | -11.88594700 | C | -7.00692300  | -6.25004900  | -10.58253500 |
| C | -4.65952000  | -9.08661200 | -13.30237900 | O | -6.66902600  | -7.31267200  | -11.10598800 |
| O | -3.94486000  | -9.63231000 | -14.14189500 | N | -7.96769400  | -6.15173100  | -9.65314900  |
| N | -5.38984200  | -7.96167600 | -13.54436200 | C | -8.40462600  | -4.87142100  | -9.09572000  |
| C | -5.38748800  | -7.27038700 | -14.81390900 | C | -8.50455900  | -3.82550000  | -10.22321700 |
| C | -4.75139500  | -5.88468800 | -14.62735000 | C | -7.11827500  | -3.61855700  | -10.90669200 |
| O | -5.22457900  | -5.09397500 | -13.79053300 | O | -7.21521700  | -3.19744900  | -12.19574800 |
| C | -6.83498500  | -7.11422700 | -15.32196500 | H | -2.25759200  | -4.97266600  | -7.60685500  |
| O | -7.47151400  | -8.37351100 | -15.47966400 | H | -2.54444000  | -3.24120800  | -7.30056300  |
| N | -3.70090100  | -5.52925600 | -15.39918600 | H | -7.64186800  | -4.53526800  | -8.38553000  |
| C | -2.91715700  | -6.39624300 | -16.31726300 | H | -8.72268600  | -2.85669600  | -9.76177400  |
| C | -2.04530400  | -7.39187200 | -15.54647600 | H | -3.19099700  | -4.44147400  | -6.17509700  |
| C | -2.10691200  | -5.35434400 | -17.11225400 | H | -5.89521600  | -5.11925700  | -11.82345000 |
| C | -1.81167000  | -4.25532400 | -16.07836800 | H | -8.48182500  | -7.01414100  | -9.45587800  |
| C | -3.09781100  | -4.19388000 | -15.24018000 | O | -6.26883700  | -2.76640100  | -10.22638700 |
| H | -2.92702000  | -3.97904100 | -14.18160900 | H | -5.26931300  | -4.86917900  | -9.97689100  |
| H | -3.79423600  | -3.43283000 | -15.61375600 | C | -9.63801400  | -4.13439500  | -11.20831700 |
| H | -0.96153000  | -4.54325100 | -15.45167000 | H | -10.59013100 | -4.23179400  | -10.67968300 |
| H | -1.57064100  | -3.29275800 | -16.53779300 | H | -9.74833800  | -3.32225300  | -11.92534700 |
| H | -1.20564100  | -5.78654400 | -17.55365500 | H | -9.46751800  | -5.05604900  | -11.77044900 |
| H | -2.71871100  | -4.94931000 | -17.92651000 | C | -9.71156400  | -5.08510700  | -8.33505200  |
| H | -3.59786700  | -6.93713900 | -16.98099700 | H | -9.54188000  | -5.67984900  | -7.43636600  |
| H | -1.38093100  | -6.87032000 | -14.84918800 | H | -10.13597400 | -4.12420900  | -8.03384300  |
| H | -2.64066400  | -8.11913400 | -14.99119800 | H | -10.44935900 | -5.60911500  | -8.94722000  |
| H | -1.41972000  | -7.95241700 | -16.25023300 |   |              |              |              |

**(5S,6R)-Me<sub>2</sub>DHU-EP-II (SkDHPase)**

|   |             |             |             |   |             |             |              |
|---|-------------|-------------|-------------|---|-------------|-------------|--------------|
| C | -2.73099400 | -0.10103300 | -4.80017800 | C | -9.01340100 | -1.75359500 | -6.98785900  |
| C | -3.58209200 | -0.18387200 | -6.01646900 | N | -7.85491000 | -2.39080900 | -7.03206300  |
| N | -3.67712000 | 0.80114600  | -6.98927900 | C | -6.95819100 | 2.60919600  | -10.69330100 |
| C | -4.40112100 | -1.18372300 | -6.45437300 | N | -7.23077500 | 1.54814300  | -9.75338100  |
| C | -4.52919500 | 0.37300700  | -7.95468900 | C | -7.12181500 | 0.23128500  | -10.11390700 |
| N | -4.97936300 | -0.83499800 | -7.66119900 | O | -6.54431300 | 0.02289900  | -11.24061100 |
| C | -9.56332600 | -3.95541700 | -4.12769600 | O | -7.55726100 | -0.62938800 | -9.29516600  |
| C | -9.02752500 | -3.19535300 | -5.28887100 | C | -5.99742500 | 1.45357600  | -14.50229300 |
| N | -9.75063200 | -2.21313900 | -5.94963600 | C | -6.27024800 | 0.08701400  | -15.05515200 |
| C | -7.84768500 | -3.28358300 | -5.97802700 | N | -6.23353100 | -1.07980500 | -14.29129700 |

|    |              |              |              |   |              |              |              |
|----|--------------|--------------|--------------|---|--------------|--------------|--------------|
| C  | -6.57288000  | -0.25519200  | -16.34663600 | C | -9.50216000  | -9.41323200  | -13.32756900 |
| C  | -6.49777100  | -2.09097200  | -15.11383600 | O | -8.40245600  | -9.97011600  | -13.38572900 |
| N  | -6.70815600  | -1.62939500  | -16.36203800 | N | -9.98764100  | -8.66631800  | -14.34941000 |
| C  | -0.67058800  | -2.26303000  | -10.70606800 | N | -7.97116400  | -10.42255700 | -9.59771800  |
| C  | -1.91917000  | -1.94378700  | -11.45641500 | C | -7.14861700  | -9.92147600  | -8.50393200  |
| N  | -1.94180100  | -1.10914600  | -12.56484400 | H | -13.87015700 | -6.22297500  | -8.12104100  |
| C  | -3.22498800  | -2.31590900  | -11.26552000 | H | -13.65418600 | -4.59391200  | -8.74364900  |
| C  | -3.21723000  | -0.99881900  | -12.99792000 | H | -14.86361000 | -5.25390300  | -6.01662100  |
| N  | -4.02159200  | -1.71429600  | -12.22529200 | H | -12.48764800 | -5.99617700  | -6.10907000  |
| Zn | -6.37486600  | -2.17660400  | -8.41458100  | H | -12.68099100 | -4.60412700  | -5.03235400  |
| Zn | -6.03471700  | -1.54967300  | -12.27637500 | H | -11.99534300 | -4.38723100  | -6.65719900  |
| H  | -1.66761500  | -0.00167900  | -5.04706500  | H | -14.44427200 | -2.85107100  | -5.47872500  |
| H  | -3.00297900  | 0.74667400   | -4.16069800  | H | -13.85471300 | -2.57839500  | -7.12955800  |
| H  | -4.60115900  | -2.14368400  | -6.01032200  | H | -15.54804200 | -2.99651300  | -6.84559300  |
| H  | -3.19959400  | 1.69060200   | -6.98242100  | H | -16.15878100 | -4.22989300  | -8.66084700  |
| H  | -4.80201200  | 0.95841300   | -8.81850500  | H | -9.79170100  | -7.12135600  | -5.68559700  |
| H  | -8.78612900  | -4.60510900  | -3.72045900  | H | -8.46829000  | -7.89084100  | -6.57443400  |
| H  | -10.41061500 | -4.58643100  | -4.41383800  | H | -10.31002000 | -9.43842300  | -7.08577800  |
| H  | -7.00396200  | -3.93660700  | -5.81967500  | H | -8.81832600  | -7.97261500  | -3.51106100  |
| H  | -10.68293500 | -1.90772700  | -5.70999500  | H | -10.59756000 | -8.57692800  | -11.67483000 |
| H  | -9.32139300  | -0.98491700  | -7.67840400  | H | -11.41285100 | -9.89658500  | -12.50407900 |
| H  | -6.62021100  | 1.65065200   | -13.62555200 | H | -10.83273000 | -8.12694400  | -14.25437600 |
| H  | -6.70313300  | 0.34786000   | -17.23089200 | H | -9.37228500  | -8.51004800  | -15.14427000 |
| H  | -6.98211200  | -2.19827600  | -17.14983500 | H | -9.31458400  | -11.31064700 | -11.54818600 |
| H  | -6.53633200  | -3.13977300  | -14.84742300 | H | -7.63527400  | -10.09672200 | -7.53938500  |
| H  | -0.89879800  | -2.97714800  | -9.91262800  | H | -6.96736900  | -8.85016600  | -8.62362400  |
| H  | 0.09142100   | -2.71485200  | -11.35091000 | H | -7.61795700  | -11.17435000 | -10.16953600 |
| H  | -3.62981600  | -3.01000800  | -10.53935800 | H | -10.76339700 | -11.01913600 | -10.57433600 |
| H  | -1.13848600  | -0.67224200  | -12.99299200 | H | -6.19253500  | -10.44688000 | -8.51858700  |
| H  | -3.51634600  | -0.41824500  | -13.85628300 | H | -7.48483600  | -8.71106500  | -4.40789900  |
| H  | -5.96602200  | 2.47958300   | -11.12924200 | H | -7.66660300  | -6.94966600  | -4.38688200  |
| H  | -9.89663600  | -3.29157700  | -3.32194700  | H | -16.36563800 | -5.83406400  | -7.94614100  |
| H  | -4.95261900  | 1.56598400   | -14.18899300 | H | -15.77394200 | -5.66918200  | -9.60250300  |
| H  | -6.20243500  | 2.21570500   | -15.25716100 | C | -12.65108500 | -2.36154800  | -18.57849700 |
| H  | -6.98442700  | 3.56727300   | -10.16787900 | C | -13.06643400 | -2.86783500  | -17.18855000 |
| H  | -7.68578300  | 2.64924300   | -11.51458900 | C | -11.87234400 | -3.30950800  | -16.37457500 |
| H  | -2.85100600  | -1.01238600  | -4.21165700  | C | -11.30618500 | -2.48791100  | -15.39530900 |
| H  | -0.23274300  | -1.37004800  | -10.24516700 | C | -11.24804100 | -4.53832100  | -16.63698900 |
| H  | -7.83218300  | 1.72910900   | -8.96424500  | C | -10.15408200 | -2.86362200  | -14.70114600 |
| C  | -15.72463000 | -5.23250100  | -8.59995100  | C | -10.10236300 | -4.93183800  | -15.95583300 |
| C  | -14.28160600 | -5.20643900  | -8.07990400  | C | -9.54626800  | -4.09341700  | -14.98054700 |
| C  | -14.15611900 | -4.68220200  | -6.63505300  | O | -8.41196400  | -4.52418400  | -14.36183400 |
| C  | -12.74990300 | -4.93340300  | -6.07598000  | H | -13.76977600 | -3.70181400  | -17.30352000 |
| C  | -14.52478200 | -3.19567100  | -6.51591700  | H | -13.60764400 | -2.07682900  | -16.65661800 |
| C  | -8.21562100  | -7.89747300  | -4.42192900  | H | -11.76987800 | -1.53025000  | -15.16983200 |
| C  | -9.08318900  | -7.95405300  | -5.67469700  | H | -11.66913400 | -5.19964200  | -17.39093700 |
| S  | -10.03669800 | -9.53421900  | -5.76651300  | H | -9.72581000  | -2.21061500  | -13.94599800 |
| C  | -9.91404000  | -10.53332600 | -11.06823400 | H | -9.62408000  | -5.88389600  | -16.16178500 |
| C  | -9.13594300  | -9.84341700  | -9.95377500  | H | -8.19447100  | -3.97789700  | -13.57904900 |
| O  | -9.58823400  | -8.84850400  | -9.36436000  | H | -11.97282000 | -1.50577800  | -18.49528800 |
| C  | -10.43908700 | -9.56132600  | -12.12935300 | H | -12.13080300 | -3.14310700  | -19.14152100 |

H -13.52139600 -2.04795600 -19.16462100  
 C -4.81204300 -9.59659900 -11.88594600  
 C -4.62542300 -9.11658900 -13.31138600  
 O -3.76785800 -9.59196000 -14.05583200  
 N -5.45160700 -8.09094400 -13.65816600  
 C -5.42922800 -7.46873800 -14.96536700  
 C -4.86176500 -6.03889500 -14.88257700  
 O -5.37909900 -5.20409000 -14.11727000  
 C -6.86813900 -7.38658300 -15.51819900  
 O -7.43144900 -8.66608600 -15.74512700  
 N -3.84695700 -5.68404900 -15.70347700  
 C -2.95484300 -6.58644400 -16.47760200  
 C -2.04530500 -7.39187100 -15.54647600  
 C -2.19744900 -5.58594700 -17.37045600  
 C -2.03111300 -4.34902500 -16.47257800  
 C -3.34525800 -4.29889800 -15.67761900  
 H -3.22495400 -3.95928400 -14.64503700  
 H -4.08154300 -3.63595100 -16.15031200  
 H -1.18181300 -4.48396400 -15.79533600  
 H -1.85597800 -3.43106300 -17.04038400  
 H -1.24758700 -5.99305900 -17.72526200  
 H -2.80441300 -5.33555200 -18.24814100  
 H -3.55567400 -7.26469000 -17.08979600  
 H -1.46567500 -6.72633100 -14.89746200  
 H -2.60878400 -8.09366200 -14.92973100  
 H -1.33702500 -7.97980800 -16.14153600  
 H -4.83232500 -8.10886700 -15.61469700  
 H -7.44302800 -9.16782800 -14.90160700  
 H -6.85609100 -6.87347000 -16.48716800  
 H -7.46907500 -6.78318700 -14.82686300  
 H -6.20677200 -7.83194100 -13.00755700  
 H -4.20182000 -8.97975500 -11.21656700

H -5.85409700 -9.52079200 -11.56721200  
 H -4.46082100 -10.62736200 -11.81560700  
 C -2.97579700 -4.24489600 -7.22764900  
 C -4.21862600 -4.19346700 -8.12216400  
 O -5.27664200 -3.67326300 -7.58553600  
 O -4.13144400 -4.60164700 -9.29202700  
 N -6.14071800 -5.68613700 -11.23769800  
 C -7.15931000 -6.55982100 -11.02617300  
 O -7.46271400 -7.46542400 -11.82722900  
 N -7.89677800 -6.38677600 -9.87770200  
 C -8.20759900 -5.08191100 -9.29420400  
 C -8.62887100 -3.99609400 -10.34102600  
 C -7.45528600 -3.28223600 -10.99514400  
 O -7.50420900 -2.93722700 -12.22727600  
 H -2.24106800 -4.94052000 -7.63556400  
 H -2.53155400 -3.24434900 -7.17934000  
 H -7.32991000 -4.70501000 -8.75941200  
 H -9.06507300 -3.18244200 -9.74097300  
 H -3.23818500 -4.53606800 -6.20688600  
 H -5.70141900 -5.71692800 -12.15330700  
 H -8.61164900 -7.10620500 -9.78127600  
 O -6.46539600 -2.88342700 -10.30184200  
 H -5.61582500 -5.26223700 -10.47129000  
 C -9.69704800 -4.48261900 -11.32461200  
 H -10.54762500 -4.89705400 -10.77727000  
 H -10.07179700 -3.66054900 -11.93698900  
 H -9.31737900 -5.25981300 -11.99063600  
 C -9.33402300 -5.30464800 -8.28138800  
 H -8.98702400 -5.94191800 -7.46911200  
 H -9.67031600 -4.35765500 -7.85685000  
 H -10.19345600 -5.79863200 -8.74436400

**(5R)-MeHYD-ES-II (*SmDHPase*)**

C -0.08296900 8.83167900 -2.33962000  
 C -0.03911500 7.68543100 -1.38618000  
 N 0.01665000 7.85002600 -0.00998600  
 C -0.02193300 6.32836300 -1.57186500  
 C 0.07289000 6.62821000 0.57299000  
 N 0.04741900 5.68166800 -0.35072100  
 C 5.61649200 3.13334200 -2.13658500  
 C 4.42855200 3.15745200 -1.23299000  
 N 4.51716100 3.01255500 0.14267300  
 C 3.09173300 3.32605400 -1.48665500  
 C 3.27182000 3.10270100 0.66272100  
 N 2.38162500 3.29018400 -0.29994100  
 C 10.19409900 0.81403900 -0.67422800  
 C 8.86267300 1.03312000 0.05629400  
 C 8.96022700 2.15107600 1.09718500  
 S 7.42292000 2.51799000 2.04156800

C 7.23291000 0.99620800 3.03726100  
 C 7.70057500 -4.37793300 1.13764400  
 C 6.60355200 -3.50957500 1.77177500  
 C 5.22208600 -4.08735900 1.55911000  
 C 4.57144000 -4.80563000 2.57048500  
 C 4.58165600 -3.95208400 0.32081000  
 C 3.31315600 -5.36804400 2.35510200  
 C 3.32355200 -4.51225900 0.09820900  
 C 2.68274500 -5.21991500 1.11849200  
 C -0.81275700 5.34072700 4.91242300  
 N 0.09416000 5.17182700 3.79422800  
 C -0.19986100 4.23195000 2.83160400  
 O -1.39123900 3.76896900 2.89998700  
 O 0.68500000 3.95873200 1.97534500  
 C -3.33407900 2.47964200 5.17066200  
 C -2.90020700 1.16545100 4.58956400

|    |             |             |             |   |             |             |             |
|----|-------------|-------------|-------------|---|-------------|-------------|-------------|
| N  | -2.54170200 | 0.98659400  | 3.25086500  | H | 3.03773400  | 3.04527400  | 1.71400200  |
| C  | -2.80543900 | -0.04669100 | 5.22130600  | H | 8.55706800  | 0.09898300  | 0.54186600  |
| C  | -2.25386300 | -0.30132300 | 3.10015600  | H | 8.07521900  | 1.27952500  | -0.66558700 |
| N  | -2.40108600 | -0.95731200 | 4.26450700  | H | 9.74875600  | 1.94038100  | 1.82808200  |
| C  | -5.74653600 | 4.75182100  | -1.67327000 | H | 9.21621800  | 3.10265200  | 0.61942300  |
| C  | -5.17201300 | 4.13842500  | -0.44893200 | H | 6.38458000  | 1.15915800  | 3.70507200  |
| N  | -5.76808800 | 4.20351500  | 0.80185300  | H | 8.12708400  | 0.82858500  | 3.64225600  |
| C  | -4.01295500 | 3.43905400  | -0.25628500 | H | 7.03295200  | 0.12106000  | 2.41629000  |
| C  | -4.97070300 | 3.56300400  | 1.68969100  | H | 10.51488700 | 1.72023900  | -1.19932400 |
| N  | -3.90033600 | 3.08803300  | 1.07674000  | H | 6.64941300  | -2.50080900 | 1.33992800  |
| C  | -2.88660300 | -3.64653100 | -4.63793300 | H | 6.79698600  | -3.40111700 | 2.84535900  |
| C  | -3.93437100 | -3.70566500 | -3.53875600 | H | 5.05521300  | -4.92071700 | 3.53765200  |
| O  | -5.02278500 | -4.24523200 | -3.70918100 | H | 5.06921400  | -3.39619100 | -0.47682700 |
| N  | -3.54425200 | -3.14707900 | -2.34934100 | H | 2.81481400  | -5.90757200 | 3.15455000  |
| C  | -4.45497300 | -3.06487700 | -1.21275800 | H | 2.84780600  | -4.36467500 | -0.86754000 |
| C  | -4.68228400 | -1.59642100 | -0.85529200 | H | 1.69336600  | -5.63948500 | 0.96635300  |
| O  | -3.72868500 | -0.90955700 | -0.42770600 | H | 7.69771100  | -5.38441100 | 1.56746700  |
| C  | -3.91620600 | -3.79758000 | 0.03906200  | H | -6.74311100 | 4.35824800  | -1.90444100 |
| O  | -3.92758900 | -5.19633200 | -0.09406800 | H | -5.09851300 | 4.53581600  | -2.52468700 |
| N  | -5.91390500 | -1.06167700 | -0.96954000 | H | -3.26842100 | 3.15438900  | -0.98872800 |
| C  | -7.17776400 | -1.72678600 | -1.39811800 | H | -5.19417500 | 3.47150800  | 2.74135800  |
| C  | -7.30712900 | -1.83858900 | -2.92321600 | H | -2.45647600 | -4.64893000 | -4.74870900 |
| C  | -8.24098000 | -0.80617400 | -0.76597900 | H | -4.58101900 | -3.55542600 | 0.87926200  |
| C  | -7.61253500 | 0.59319200  | -0.85812300 | H | -2.92343700 | -3.40287300 | 0.28372900  |
| C  | -6.12987400 | 0.33840000  | -0.55708400 | H | -3.17663700 | -5.48742700 | -0.64294000 |
| C  | -0.65468600 | 2.69727500  | -4.32910100 | H | -5.36824400 | -3.56673200 | -1.52948800 |
| C  | -0.77832100 | 2.76594300  | -2.81246600 | H | -2.73830700 | -2.52680600 | -2.37369000 |
| O  | 0.16786500  | 3.37757700  | -2.19889900 | H | -8.39421900 | -1.08038600 | 0.28394700  |
| O  | -1.76078100 | 2.20788000  | -2.26669200 | H | -9.20357500 | -0.88400800 | -1.27709300 |
| C  | 4.34067300  | 1.25928000  | -5.73769800 | H | -8.05858600 | 1.30694900  | -0.15998400 |
| C  | 3.77195300  | 0.47400800  | -4.56009700 | H | -7.73382700 | 0.99829500  | -1.86805700 |
| S  | 4.76911500  | -1.06138800 | -4.27625800 | H | -5.90248500 | 0.43792900  | 0.51122700  |
| C  | 0.88536000  | -5.10401800 | -3.18229000 | H | -5.44716100 | 1.00154800  | -1.09288400 |
| C  | 1.25475400  | -3.73193900 | -3.72567100 | H | -7.22661400 | -2.72584700 | -0.95697900 |
| O  | 1.97196600  | -2.95837900 | -3.06925600 | H | -1.60184800 | 2.40139900  | -4.78159300 |
| C  | -0.03516200 | -4.96224900 | -1.95210400 | H | -0.31737200 | 3.65333600  | -4.73838500 |
| C  | -0.48741600 | -6.28504700 | -1.34648000 | H | 2.73762300  | 0.18792900  | -4.76244300 |
| O  | -1.66789000 | -6.52214600 | -1.10322500 | H | 3.77600000  | 1.07782700  | -3.64878600 |
| N  | 0.48325600  | -7.20586900 | -1.09267700 | H | 3.79805100  | -1.79826200 | -3.69344500 |
| N  | 0.75016300  | -3.40594600 | -4.93069500 | H | 5.38772500  | 1.53198500  | -5.56925800 |
| C  | 0.89930600  | -2.07250800 | -5.49904400 | H | 0.46377100  | -4.37150300 | -1.17602600 |
| Zn | -2.14246500 | 2.35741200  | 1.79191000  | H | -0.94776000 | -4.42661300 | -2.22052700 |
| Zn | 0.35476600  | 3.62682000  | -0.13156900 | H | 0.20547400  | -8.04946900 | -0.61203800 |
| O  | -0.99922100 | 2.26379300  | 0.28418600  | H | 1.46469800  | -6.97870900 | -1.12346800 |
| H  | -0.96270400 | 9.46570600  | -2.17948500 | H | 0.39948400  | -5.71877600 | -3.94738200 |
| H  | 0.80616000  | 9.46702300  | -2.25470400 | H | 0.26924400  | -1.35299600 | -4.96949100 |
| H  | -0.03648000 | 5.75844700  | -2.48684300 | H | 1.94765400  | -1.77393000 | -5.44991800 |
| H  | 0.13410800  | 6.47543400  | 1.63975700  | H | 0.09642300  | -4.04028200 | -5.36361700 |
| H  | 6.11797700  | 2.15882600  | -2.12919000 | H | -0.88136200 | 4.44782900  | 5.54568900  |
| H  | 5.30361500  | 3.33825300  | -3.16257500 | H | -1.81115600 | 5.58109200  | 4.54601600  |
| H  | 2.57737300  | 3.46779500  | -2.42386400 | H | -3.22176600 | 2.46989500  | 6.25762700  |



|   |             |             |             |   |             |             |             |
|---|-------------|-------------|-------------|---|-------------|-------------|-------------|
| H | -2.73922100 | 3.29360800  | 4.75604400  | C | 1.28875700  | -0.06915400 | -0.90539500 |
| H | -2.99335500 | -0.33050900 | 6.24431900  | C | 0.09590100  | -0.40940800 | -0.02110700 |
| H | -1.89710300 | -0.76232600 | 2.19521700  | O | 0.09823900  | -0.49750500 | 1.20671100  |
| H | -2.16516900 | -1.93147300 | 4.40426800  | H | 1.44162400  | 1.01282100  | -0.83957900 |
| H | 0.60122000  | -2.10659800 | -6.54853000 | H | -1.92535000 | -0.88375000 | -0.58840300 |
| H | 1.82409100  | -5.60080300 | -2.91705400 | H | 1.38444100  | -0.98655800 | -2.83601400 |
| H | -7.23038800 | -0.85632500 | -3.40073000 | C | 2.56188200  | -0.80022300 | -0.49042600 |
| H | -6.54494600 | -2.49812300 | -3.34366100 | H | 3.40118900  | -0.50300900 | -1.12521500 |
| H | -8.28463200 | -2.26412000 | -3.17319200 | H | 2.79862900  | -0.54439700 | 0.54495200  |
| H | -0.12598100 | 8.45756300  | -3.36442900 | H | 2.44234000  | -1.88219400 | -0.56470500 |
| H | 6.35482900  | 3.89252800  | -1.85533000 | H | -1.40950500 | 2.09080600  | -0.59866300 |
| H | 5.37572400  | 2.84613500  | 0.67108500  | C | -0.98530700 | -5.37581300 | 7.06970500  |
| H | 0.02582100  | 8.73238400  | 0.48003500  | C | -0.15319900 | -6.06652200 | 5.98160000  |
| H | -5.83260700 | 5.84118700  | -1.58506600 | C | -0.26190500 | -5.32744100 | 4.66948200  |
| H | -6.64420700 | 4.65565100  | 1.01934600  | C | 0.35441000  | -4.07922300 | 4.51494200  |
| H | 10.99024200 | 0.53490300  | 0.02417300  | C | -1.04753700 | -5.80895500 | 3.61399300  |
| H | 10.10478600 | 0.01381600  | -1.41463300 | C | 0.19675300  | -3.33290700 | 3.34944800  |
| H | 8.69299400  | -3.94377800 | 1.29899500  | C | -1.22006000 | -5.08249400 | 2.43700000  |
| H | 7.54712800  | -4.47874000 | 0.05869900  | C | -0.58810600 | -3.84179000 | 2.30573200  |
| H | -3.38833900 | -3.40663400 | -5.57826200 | O | -0.75133700 | -3.14805300 | 1.14068300  |
| H | -2.09710300 | -2.92342600 | -4.43718600 | H | -0.49211100 | -7.10091000 | 5.85780200  |
| H | 4.29296800  | 0.67605100  | -6.66111700 | H | 0.89457300  | -6.11751200 | 6.30394500  |
| H | 3.77286300  | 2.18443000  | -5.88490500 | H | 0.97614600  | -3.68529100 | 5.31581900  |
| H | -4.39199000 | 2.68087700  | 4.95728600  | H | -1.54644100 | -6.76937300 | 3.71706000  |
| H | 1.07847800  | 5.34751000  | 3.93454600  | H | 0.70551400  | -2.38057700 | 3.22473500  |
| H | -0.46231800 | 6.17256400  | 5.52971700  | H | -1.84987600 | -5.45270600 | 1.63324300  |
| H | 0.10205900  | 1.94649700  | -4.58125700 | H | -0.34846300 | -2.26413400 | 1.24431300  |
| N | -0.94223500 | -0.70817400 | -0.85105500 | H | -0.64587100 | -4.34713500 | 7.23051300  |
| C | -0.50929300 | -0.85026300 | -2.17146600 | H | -2.04238500 | -5.33831000 | 6.78627100  |
| O | -1.17963000 | -1.34649400 | -3.06857700 | H | -0.91225200 | -5.90389800 | 8.02651300  |
| N | 0.78935800  | -0.41111600 | -2.24418600 |   |             |             |             |

**(5R)-MeHYD-TS1-II (*SmDHPase*)**

|   |             |             |             |   |             |             |            |
|---|-------------|-------------|-------------|---|-------------|-------------|------------|
| C | 0.85117200  | 8.74409700  | -2.10532300 | C | 7.32394800  | -5.23379000 | 1.03959500 |
| C | 0.69580000  | 7.58248400  | -1.19185900 | C | 6.56296300  | -4.03239800 | 1.61877500 |
| N | 0.51189000  | 7.69342000  | 0.17818800  | C | 5.06727200  | -4.20151300 | 1.48481400 |
| C | 0.71682900  | 6.23785500  | -1.43339800 | C | 4.29328100  | -4.67766200 | 2.55109700 |
| C | 0.44009000  | 6.44843700  | 0.70830500  | C | 4.43402700  | -3.94096000 | 0.26297100 |
| N | 0.55829900  | 5.54323500  | -0.24924400 | C | 2.92205300  | -4.88502200 | 2.40397500 |
| C | 5.99728400  | 2.53887200  | -2.01145000 | C | 3.06322300  | -4.14741400 | 0.10665500 |
| C | 4.82170400  | 2.69090900  | -1.11350000 | C | 2.30256800  | -4.61863400 | 1.18117600 |
| N | 4.86913100  | 2.51250200  | 0.25951400  | C | -0.32209300 | 5.10604200  | 5.01502900 |
| C | 3.52151900  | 3.01310900  | -1.38945700 | N | 0.46351200  | 4.84204400  | 3.81757100 |
| C | 3.63266100  | 2.73140200  | 0.75994000  | C | 0.13493500  | 3.88512100  | 2.87690900 |
| N | 2.78947100  | 3.03303900  | -0.21757300 | O | -1.03078100 | 3.36841500  | 2.96612900 |
| C | 10.31592100 | -0.23987300 | -0.56227700 | O | 1.00118100  | 3.64037500  | 1.98597800 |
| C | 9.00244700  | 0.07863400  | 0.16501600  | C | -3.10026000 | 2.48396300  | 5.14169300 |
| C | 9.18803800  | 1.16729300  | 1.22494700  | C | -3.41384600 | 1.22114900  | 4.40433300 |
| S | 7.68050800  | 1.66142100  | 2.16001000  | N | -3.02623600 | 0.98734500  | 3.08823600 |
| C | 7.32079600  | 0.14145500  | 3.11075900  | C | -4.08632800 | 0.11826800  | 4.86310700 |

|    |             |             |             |   |             |             |             |
|----|-------------|-------------|-------------|---|-------------|-------------|-------------|
| C  | -3.46282500 | -0.22502400 | 2.76971000  | H | 8.24293800  | 0.40106900  | -0.55666400 |
| N  | -4.10855100 | -0.78129400 | 3.81524200  | H | 9.94518200  | 0.87414700  | 1.96048200  |
| C  | -5.17470800 | 5.18708400  | -1.65625100 | H | 9.53566200  | 2.09864400  | 0.76543400  |
| C  | -4.65714300 | 4.36068000  | -0.52934800 | H | 6.48729500  | 0.37524200  | 3.77623200  |
| N  | -5.33063400 | 4.16413800  | 0.66804800  | H | 8.18563600  | -0.13571800 | 3.71816800  |
| C  | -3.49023200 | 3.65806700  | -0.39575300 | H | 7.03586200  | -0.69012300 | 2.46404200  |
| C  | -4.56948200 | 3.37218800  | 1.46237500  | H | 10.71372700 | 0.64435200  | -1.07187600 |
| N  | -3.44530500 | 3.04847400  | 0.84556600  | H | 6.88023700  | -3.12012200 | 1.09638300  |
| C  | -3.04959300 | -3.34110000 | -4.85853800 | H | 6.83034700  | -3.90327500 | 2.67417100  |
| C  | -4.15132500 | -3.28604500 | -3.80746300 | H | 4.77116600  | -4.88438500 | 3.50588400  |
| O  | -5.28030200 | -3.70547700 | -4.04732700 | H | 5.01837400  | -3.56598900 | -0.57449400 |
| N  | -3.78321600 | -2.77048300 | -2.59235700 | H | 2.32892200  | -5.23758300 | 3.24201600  |
| C  | -4.71213700 | -2.74476000 | -1.47040400 | H | 2.60018700  | -3.90127500 | -0.84537400 |
| C  | -4.93080500 | -1.32195800 | -0.94850100 | H | 1.23050800  | -4.75901100 | 1.08723700  |
| O  | -3.99021600 | -0.69830300 | -0.40694900 | H | 7.04541000  | -6.15695300 | 1.55731500  |
| C  | -4.23429100 | -3.61495300 | -0.27849400 | H | -6.14641900 | 4.83084700  | -2.01698200 |
| O  | -4.31573600 | -4.98685700 | -0.55360100 | H | -4.47241500 | 5.13737000  | -2.49037300 |
| N  | -6.15810000 | -0.77368000 | -0.98223400 | H | -2.70910200 | 3.53134300  | -1.13102500 |
| C  | -7.38416700 | -1.31407500 | -1.62569900 | H | -4.86109400 | 3.04989600  | 2.44979500  |
| C  | -7.31377700 | -1.18721400 | -3.14756800 | H | -2.74933400 | -4.38827700 | -4.97701600 |
| C  | -8.48536900 | -0.45068800 | -0.98022700 | H | -4.90604200 | -3.40675600 | 0.56846400  |
| C  | -7.81442200 | 0.91899700  | -0.78985700 | H | -3.23088900 | -3.29098600 | 0.02172300  |
| C  | -6.37526900 | 0.56186000  | -0.39289200 | H | -3.46337800 | -5.31030200 | -0.89681900 |
| C  | -0.09583700 | 3.13104400  | -4.48981400 | H | -5.63368700 | -3.18577800 | -1.84766600 |
| C  | -0.24429900 | 3.05797100  | -2.97659900 | H | -2.87722700 | -2.30914200 | -2.51193200 |
| O  | 0.75906100  | 3.41622300  | -2.26946800 | H | -8.76458700 | -0.87099000 | -0.00748100 |
| O  | -1.34737000 | 2.66333500  | -2.51762300 | H | -9.38568600 | -0.40991000 | -1.59777200 |
| C  | 4.61666400  | 0.90692000  | -5.69091400 | H | -8.31100900 | 1.53388800  | -0.03422600 |
| C  | 3.96871300  | 0.16504500  | -4.52548900 | H | -7.82236500 | 1.48027400  | -1.72973900 |
| S  | 4.85513000  | -1.42795500 | -4.20209900 | H | -6.25226500 | 0.49846600  | 0.69551000  |
| C  | 0.68281200  | -4.96848300 | -3.10300000 | H | -5.62438800 | 1.26452500  | -0.76248400 |
| C  | 1.12729300  | -3.64808400 | -3.71662200 | H | -7.51078300 | -2.36432100 | -1.34960100 |
| O  | 1.87567700  | -2.87765200 | -3.09323000 | H | -0.74577400 | 3.92266100  | -4.87790400 |
| C  | -0.24108800 | -4.71919400 | -1.89332900 | H | 0.93397100  | 3.33698200  | -4.78525400 |
| C  | -0.68154300 | -5.98948000 | -1.17876500 | H | 2.92532400  | -0.06516900 | -4.74968400 |
| O  | -1.86677900 | -6.25758900 | -0.98716100 | H | 3.98473400  | 0.77288000  | -3.61672000 |
| N  | 0.30751400  | -6.83159700 | -0.77268900 | H | 3.80476100  | -2.08381400 | -3.66096700 |
| N  | 0.66294000  | -3.37827200 | -4.95127000 | H | 5.67297500  | 1.11827700  | -5.49380400 |
| C  | 0.87948300  | -2.09776600 | -5.61263400 | H | 0.26673900  | -4.06456100 | -1.17687800 |
| Zn | -1.82311100 | 2.06607800  | 1.70739000  | H | -1.14855700 | -4.20294600 | -2.20906700 |
| Zn | 0.81556300  | 3.50935500  | -0.13873900 | H | 0.02927600  | -7.62102300 | -0.20714400 |
| O  | -0.67601100 | 2.18205600  | -0.04755700 | H | 1.26725400  | -6.52604100 | -0.70679100 |
| H  | -0.02457700 | 9.40347900  | -2.08997200 | H | 0.17543700  | -5.60316300 | -3.83735700 |
| H  | 1.72778200  | 9.35145400  | -1.85153600 | H | 0.43797700  | -1.28995500 | -5.02200200 |
| H  | 0.84962600  | 5.70859600  | -2.36241800 | H | 1.94900200  | -1.91694400 | -5.74465700 |
| H  | 0.31961200  | 6.24794800  | 1.76263800  | H | 0.00153900  | -4.02045200 | -5.35973800 |
| H  | 6.35074100  | 1.50204800  | -2.05382900 | H | -0.19478100 | 4.33774800  | 5.78896600  |
| H  | 5.72480000  | 2.83674500  | -3.02604600 | H | -1.37766600 | 5.15257400  | 4.74716500  |
| H  | 3.04615200  | 3.22484600  | -2.33309300 | H | -3.52525900 | 2.44751800  | 6.14787400  |
| H  | 3.37076700  | 2.67562400  | 1.80461100  | H | -2.02189600 | 2.63479700  | 5.21478700  |
| H  | 8.61718500  | -0.83427300 | 0.63420400  | H | -4.52979000 | -0.09962500 | 5.82147600  |

|   |             |             |             |   |             |             |             |
|---|-------------|-------------|-------------|---|-------------|-------------|-------------|
| H | -3.34466600 | -0.71204000 | 1.81332200  | C | -0.46284600 | 0.29769000  | 0.13258900  |
| H | -4.48608300 | -1.71717700 | 3.83323300  | O | -0.80183600 | 0.26105100  | 1.37589900  |
| H | 0.40532700  | -2.12883800 | -6.59436200 | H | 1.52033300  | 0.97463100  | -0.46467000 |
| H | 1.59142900  | -5.49525200 | -2.79540000 | H | -2.30113000 | -0.39686800 | -0.70314200 |
| H | -7.11847700 | -0.15300300 | -3.44922600 | H | 1.38117900  | -1.13987500 | -2.18104900 |
| H | -6.54325000 | -1.83535700 | -3.56884100 | C | 1.73594400  | -0.90492200 | 0.55643100  |
| H | -8.26875300 | -1.49453100 | -3.58750000 | H | 2.72624500  | -1.12747700 | 0.15125600  |
| H | 0.98003000  | 8.38932100  | -3.12970700 | H | 1.85793100  | -0.43257800 | 1.53443500  |
| H | 6.83748100  | 3.16668900  | -1.69427600 | H | 1.20316900  | -1.84731500 | 0.69416600  |
| H | 5.69480800  | 2.23981400  | 0.79717300  | H | -1.07119600 | 2.31200900  | -0.96419700 |
| H | 0.45065300  | 8.55547600  | 0.69977200  | C | -1.51803400 | -5.61183900 | 6.81074200  |
| H | -5.29039700 | 6.24035200  | -1.37487800 | C | -0.33614500 | -5.76235600 | 5.84189100  |
| H | -6.23320000 | 4.54482100  | 0.91210900  | C | -0.52450500 | -4.89431900 | 4.62038500  |
| H | 11.08190700 | -0.59446100 | 0.13558600  | C | -0.14504300 | -3.54654400 | 4.63278900  |
| H | 10.16469500 | -1.01869400 | -1.31529500 | C | -1.18694400 | -5.37857400 | 3.48393700  |
| H | 8.40687600  | -5.10382800 | 1.13814500  | C | -0.42017800 | -2.70384000 | 3.55824800  |
| H | 7.09493800  | -5.36753300 | -0.02217800 | C | -1.47436600 | -4.55431100 | 2.39845900  |
| H | -3.46737000 | -3.01296800 | -5.81287100 | C | -1.09180700 | -3.20772200 | 2.43775400  |
| H | -2.18126300 | -2.73446900 | -4.59663200 | O | -1.38695400 | -2.42764600 | 1.35854000  |
| H | 4.56157000  | 0.32036200  | -6.61192500 | H | -0.23798600 | -6.81333100 | 5.54574800  |
| H | 4.10988700  | 1.86339100  | -5.86107800 | H | 0.59419600  | -5.49385600 | 6.35702900  |
| H | -3.50557100 | 3.36312000  | 4.62982500  | H | 0.37150600  | -3.14533000 | 5.50192600  |
| H | 1.44998500  | 5.05675800  | 3.84449100  | H | -1.49843000 | -6.42008900 | 3.45220900  |
| H | -0.02108100 | 6.07011400  | 5.43227800  | H | -0.11427500 | -1.66142200 | 3.57705900  |
| H | -0.43593900 | 2.19292600  | -4.93571900 | H | -1.99932400 | -4.93938800 | 1.52950700  |
| N | -1.29391900 | -0.23191100 | -0.83108600 | H | -1.14366200 | -1.49054300 | 1.53054500  |
| C | -0.59966300 | -0.78885400 | -1.89426500 | H | -1.62092900 | -4.57288100 | 7.14105200  |
| O | -1.11234700 | -1.43255700 | -2.81165300 | H | -2.45669800 | -5.90078700 | 6.32696900  |
| N | 0.72461900  | -0.52281200 | -1.70834600 | H | -1.38942600 | -6.23801800 | 7.70024200  |
| C | 0.97634400  | 0.03644400  | -0.37608000 |   |             |             |             |

**(5R)-MeHYD-INT1-II (SmDHPase)**

|   |             |             |             |   |             |             |             |
|---|-------------|-------------|-------------|---|-------------|-------------|-------------|
| C | 0.65985100  | 8.67036500  | -2.17075400 | C | 5.36130300  | -3.74944200 | 1.45043800  |
| C | 0.48448500  | 7.49732900  | -1.27541500 | C | 4.53735700  | -4.01520700 | 2.55220100  |
| N | 0.23887000  | 7.59792400  | 0.08540800  | C | 4.75804300  | -3.47900100 | 0.21464700  |
| C | 0.54440900  | 6.15395000  | -1.52039100 | C | 3.14752700  | -4.01346400 | 2.42596500  |
| C | 0.17141900  | 6.35147000  | 0.60910900  | C | 3.36947100  | -3.47837300 | 0.07792800  |
| N | 0.35058200  | 5.45189300  | -0.34532300 | C | 2.56077600  | -3.74607500 | 1.18762200  |
| C | 5.94049400  | 2.58004900  | -2.03278100 | C | -0.47706600 | 5.02081800  | 4.94961800  |
| C | 4.75888600  | 2.75617200  | -1.14761000 | N | 0.28847200  | 4.74804300  | 3.73828400  |
| N | 4.80526300  | 2.62409500  | 0.22981300  | C | -0.05647300 | 3.80005500  | 2.79631200  |
| C | 3.45422500  | 3.04688800  | -1.43752300 | O | -1.22588400 | 3.29899100  | 2.88118300  |
| C | 3.56502300  | 2.83445100  | 0.72064000  | O | 0.81018200  | 3.55263800  | 1.90002900  |
| N | 2.71807300  | 3.08842600  | -0.26764800 | C | -3.19763600 | 2.33849800  | 5.06455400  |
| C | 10.31016100 | -0.10026200 | -0.55154100 | C | -3.51940500 | 1.02756000  | 4.42867300  |
| C | 8.96997700  | 0.20613700  | 0.13215800  | N | -3.20725500 | 0.77815500  | 3.10102200  |
| C | 9.12201900  | 1.25180800  | 1.23950500  | C | -4.09617400 | -0.09691600 | 4.95739100  |
| S | 7.58370500  | 1.73546000  | 2.13010400  | C | -3.58327300 | -0.46716300 | 2.83287200  |
| C | 7.13099600  | 0.17547600  | 2.97109500  | N | -4.13087000 | -1.02440300 | 3.93166100  |
| C | 7.41889200  | -5.15576400 | 1.04205600  | C | -5.28900700 | 4.98248000  | -1.75143200 |
| C | 6.86772000  | -3.81996000 | 1.56336800  | C | -4.81361200 | 4.16597000  | -0.59636800 |

|    |             |             |             |   |             |             |             |
|----|-------------|-------------|-------------|---|-------------|-------------|-------------|
| N  | -5.59969500 | 3.78883000  | 0.48368100  | H | 6.81862600  | -0.59682800 | 2.26646700  |
| C  | -3.59015900 | 3.60844600  | -0.34659300 | H | 10.73717000 | 0.79720000  | -1.01198100 |
| C  | -4.84796900 | 3.03156500  | 1.31952700  | H | 7.32137300  | -2.99954000 | 0.99166200  |
| N  | -3.62044000 | 2.90094100  | 0.84093600  | H | 7.17013500  | -3.68259100 | 2.60820800  |
| C  | -2.95714200 | -3.50291600 | -4.92338900 | H | 4.99147500  | -4.22716400 | 3.51755700  |
| C  | -4.10716100 | -3.40840100 | -3.93243300 | H | 5.38240400  | -3.26262100 | -0.64961500 |
| O  | -5.20713800 | -3.89739300 | -4.17705400 | H | 2.51837400  | -4.21030700 | 3.28901300  |
| N  | -3.81052600 | -2.75602700 | -2.76856500 | H | 2.92608400  | -3.25476100 | -0.88915200 |
| C  | -4.61862500 | -2.97106000 | -1.57915500 | H | 1.47972300  | -3.72776900 | 1.09962600  |
| C  | -4.96057900 | -1.63121900 | -0.91887900 | H | 7.00614400  | -5.99549200 | 1.60991000  |
| O  | -4.08800200 | -0.99597200 | -0.28911900 | H | -6.14558000 | 4.51951100  | -2.25401400 |
| C  | -3.88039100 | -3.88444300 | -0.57913800 | H | -4.48284000 | 5.06884100  | -2.48205200 |
| O  | -3.63204400 | -5.10748500 | -1.22868700 | H | -2.72093100 | 3.64066800  | -0.98106100 |
| N  | -6.21625300 | -1.14500100 | -0.99850100 | H | -5.21782600 | 2.59143200  | 2.23260000  |
| C  | -7.38231800 | -1.69825800 | -1.73706400 | H | -2.56871400 | -4.52677100 | -4.87635500 |
| C  | -7.27814300 | -1.44014100 | -3.24294000 | H | -4.52385000 | -4.01443000 | 0.31095000  |
| C  | -8.55509500 | -0.95925800 | -1.06429300 | H | -2.96366300 | -3.38415500 | -0.24407200 |
| C  | -7.97974100 | 0.43222800  | -0.75539200 | H | -2.81942200 | -5.51387700 | -0.87038800 |
| C  | -6.53002500 | 0.13748500  | -0.34319900 | H | -5.51421800 | -3.49135600 | -1.91970800 |
| C  | -0.32407500 | 2.81887200  | -4.48869600 | H | -2.85948400 | -2.40359200 | -2.63947800 |
| C  | -0.40198000 | 2.96529500  | -2.98809300 | H | -8.82959100 | -1.46727400 | -0.13289500 |
| O  | 0.65394500  | 3.25633300  | -2.33706100 | H | -9.44072800 | -0.92944500 | -1.70341100 |
| O  | -1.52675300 | 2.73812500  | -2.45553100 | H | -8.53475800 | 0.95709000  | 0.02740300  |
| C  | 4.61883600  | 0.91117900  | -5.71732900 | H | -8.00120800 | 1.05896900  | -1.65278100 |
| C  | 4.00020700  | 0.19472500  | -4.52035300 | H | -6.42532900 | 0.02198200  | 0.74308600  |
| S  | 5.05962100  | -1.22572000 | -3.98355400 | H | -5.81642400 | 0.90502400  | -0.65459600 |
| C  | 0.92933500  | -4.91035000 | -2.98311000 | H | -7.45205500 | -2.77404900 | -1.55673100 |
| C  | 1.29010200  | -3.60682800 | -3.68697700 | H | -0.34628200 | 1.75096500  | -4.73104200 |
| O  | 2.04195800  | -2.77474500 | -3.15270300 | H | -1.20242800 | 3.27054200  | -4.95528700 |
| C  | 0.00813300  | -4.67144400 | -1.76714200 | H | 3.01664600  | -0.20513200 | -4.77236900 |
| C  | -0.11396800 | -5.84722600 | -0.80684900 | H | 3.87205200  | 0.87996600  | -3.67784100 |
| O  | -1.20595500 | -6.25208000 | -0.39918500 | H | 4.04940600  | -1.98912200 | -3.51417200 |
| N  | 1.04424800  | -6.43262800 | -0.39841500 | H | 5.62177400  | 1.28566700  | -5.48636200 |
| N  | 0.77814800  | -3.42185900 | -4.92009100 | H | 0.37553700  | -3.81099600 | -1.19675000 |
| C  | 0.94822200  | -2.17485500 | -5.65588400 | H | -1.00195300 | -4.42082300 | -2.09131800 |
| Zn | -2.08233100 | 1.89366400  | 1.77796800  | H | 0.96077000  | -7.10975300 | 0.34708400  |
| Zn | 0.73568400  | 3.45057700  | -0.18617100 | H | 1.92352600  | -5.94014400 | -0.46805600 |
| H  | -0.22650800 | 9.31510200  | -2.18584500 | H | 0.46169100  | -5.62114100 | -3.67259800 |
| H  | 1.51498300  | 9.28768400  | -1.87238900 | H | 0.51762500  | -1.34001800 | -5.09447600 |
| H  | 0.72867200  | 5.63483000  | -2.44651100 | H | 2.00890200  | -1.98258400 | -5.83411300 |
| H  | 0.01744500  | 6.14625200  | 1.65801600  | H | 0.09710400  | -4.08514100 | -5.25707400 |
| H  | 6.26912500  | 1.53494300  | -2.06907100 | H | -0.32679400 | 4.26219600  | 5.72837500  |
| H  | 5.68619500  | 2.88176800  | -3.05100000 | H | -1.53781900 | 5.05602000  | 4.70107400  |
| H  | 2.98049200  | 3.21316500  | -2.39089500 | H | -3.55706100 | 2.36207700  | 6.09673200  |
| H  | 3.30117300  | 2.79716400  | 1.76535400  | H | -2.12179700 | 2.51919200  | 5.06047700  |
| H  | 8.55698600  | -0.71896300 | 0.55119900  | H | -4.46640100 | -0.31588700 | 5.94598200  |
| H  | 8.24416700  | 0.56282800  | -0.60770100 | H | -3.47840300 | -0.96705800 | 1.87932800  |
| H  | 9.84195900  | 0.91969800  | 1.99552400  | H | -4.44136300 | -1.98232500 | 4.00089800  |
| H  | 9.50148100  | 2.19480600  | 0.83171600  | H | 0.43986600  | -2.26412700 | -6.61668200 |
| H  | 6.29638600  | 0.40683100  | 3.63604100  | H | 1.87959600  | -5.35230700 | -2.66863800 |
| H  | 7.96858000  | -0.18227200 | 3.57457200  | H | -7.12283700 | -0.37701000 | -3.45360500 |

|   |             |             |             |   |             |             |             |
|---|-------------|-------------|-------------|---|-------------|-------------|-------------|
| H | -6.46719900 | -2.01934900 | -3.68728400 | H | -2.12542600 | -4.89458000 | 7.01204300  |
| H | -8.20618100 | -1.75317100 | -3.73333700 | H | -1.97048000 | -6.37116900 | 6.05425600  |
| H | 0.83829800  | 8.32935300  | -3.19232800 | H | -1.25915700 | -6.29219200 | 7.67255400  |
| H | 6.78899600  | 3.19079500  | -1.70568700 | C | -0.37554500 | -4.39734700 | 4.88475000  |
| H | 5.63447000  | 2.37228000  | 0.77416400  | C | -0.24754600 | -3.00507400 | 4.83951200  |
| H | 0.13507400  | 8.45686500  | 0.60576600  | C | -0.79321200 | -5.04916900 | 3.71347200  |
| H | -5.58549700 | 5.99391200  | -1.45010700 | C | -0.52718800 | -2.27957600 | 3.67854300  |
| H | -6.57108500 | 4.02519600  | 0.62429700  | C | -1.08389000 | -4.34743600 | 2.54972800  |
| H | 11.04296400 | -0.48821400 | 0.16399800  | C | -0.95324700 | -2.95012600 | 2.52365600  |
| H | 10.18245300 | -0.84981600 | -1.33784600 | O | -1.24422000 | -2.31360300 | 1.36010400  |
| H | 8.51009300  | -5.19435500 | 1.12508800  | H | 0.07807400  | -2.47087900 | 5.72963500  |
| H | 7.15461900  | -5.30438400 | -0.00952600 | H | -0.89922700 | -6.13181200 | 3.71349400  |
| H | -3.34067700 | -3.34140900 | -5.93317300 | H | -0.40827300 | -1.20005500 | 3.65862600  |
| H | -2.15106000 | -2.80090000 | -4.70064400 | H | -1.40470800 | -4.86725700 | 1.65301100  |
| H | 4.70561500  | 0.24078100  | -6.57658900 | H | -1.13603800 | -1.32692300 | 1.42892300  |
| H | 4.00127100  | 1.76822700  | -6.00870700 | N | -1.40612600 | -0.08341500 | -1.04874600 |
| H | -3.66059900 | 3.17044700  | 4.52375700  | C | -0.65542400 | -0.99161100 | -1.76631100 |
| H | 1.27446000  | 4.96642400  | 3.74714700  | O | -1.09037600 | -1.78096700 | -2.61578000 |
| H | -0.17494800 | 5.99198600  | 5.34865100  | N | 0.64450300  | -0.87356300 | -1.38554100 |
| H | 0.59015000  | 3.25504100  | -4.89461400 | C | 0.85686400  | 0.18905200  | -0.41457100 |
| C | 1.70495000  | -0.22125200 | 0.78102600  | C | -0.62049800 | 0.58865100  | -0.03689800 |
| H | 2.72121600  | -0.46989900 | 0.46178600  | O | -1.02058500 | 0.33937800  | 1.22929700  |
| H | 1.75351100  | 0.59807900  | 1.50259800  | H | 1.31588200  | 1.04736200  | -0.91520200 |
| H | 1.27953700  | -1.09320300 | 1.27757800  | H | -2.37503500 | -0.33442800 | -0.83802300 |
| C | -1.44809500 | -5.71737400 | 6.75964000  | H | 1.36567300  | -1.34440900 | -1.92229300 |
| C | -0.14007500 | -5.18380500 | 6.15531300  | O | -0.79309600 | 2.05762600  | -0.19674900 |
| H | 0.53005400  | -6.02966000 | 5.95367200  | H | -1.19618500 | 2.27211100  | -1.14439700 |
| H | 0.37331900  | -4.55318000 | 6.89054900  |   |             |             |             |

**(5R)-MeHYD-TS2-II (*SmDHPase*)**

|   |             |             |             |   |             |             |             |
|---|-------------|-------------|-------------|---|-------------|-------------|-------------|
| C | 0.99868700  | 8.60074800  | -2.35754300 | C | 4.54862800  | -3.73296000 | 0.24744700  |
| C | 0.79969400  | 7.41520400  | -1.46454200 | C | 2.92663800  | -4.18694600 | 2.46874100  |
| N | 0.62167400  | 7.53597600  | -0.09456100 | C | 3.16030900  | -3.70428200 | 0.11050600  |
| C | 0.76669800  | 6.06227300  | -1.69237900 | C | 2.34582500  | -3.92946400 | 1.22539600  |
| C | 0.50244200  | 6.30082400  | 0.44559400  | C | -0.24277300 | 5.15431900  | 4.84609200  |
| N | 0.58339800  | 5.37723300  | -0.50048200 | N | 0.55539800  | 4.88405000  | 3.66736800  |
| C | 6.01581000  | 2.29448000  | -2.12154000 | C | 0.22257500  | 3.89709500  | 2.76552500  |
| C | 4.83530000  | 2.53743800  | -1.24738000 | O | -0.93995900 | 3.39222800  | 2.86725200  |
| N | 4.89163400  | 2.46057400  | 0.13298500  | O | 1.10713200  | 3.63531300  | 1.88903200  |
| C | 3.53310800  | 2.85065100  | -1.53487700 | C | -3.07431600 | 2.59380500  | 5.03499400  |
| C | 3.66303400  | 2.72423400  | 0.62657200  | C | -3.43999900 | 1.29239900  | 4.40709200  |
| N | 2.81015800  | 2.96139400  | -0.36131800 | N | -3.11629800 | 1.01591500  | 3.08809100  |
| C | 10.27755300 | -0.53833900 | -0.60999600 | C | -4.06756100 | 0.19893500  | 4.94302800  |
| C | 9.02979800  | -0.11330800 | 0.17736100  | C | -3.53483700 | -0.21807200 | 2.83285100  |
| C | 9.26571400  | 1.18114100  | 0.95900200  | N | -4.12197800 | -0.74013700 | 3.92906300  |
| S | 7.83237700  | 1.84009400  | 1.90909200  | C | -5.09885200 | 5.18028000  | -1.82310400 |
| C | 7.57815500  | 0.53127200  | 3.16132100  | C | -4.59461100 | 4.36957900  | -0.66841800 |
| C | 7.18469800  | -5.43080800 | 1.10902500  | N | -5.35843600 | 4.09969900  | 0.45903300  |
| C | 6.65014100  | -4.07911400 | 1.60700000  | C | -3.39937500 | 3.73839800  | -0.42908500 |
| C | 5.14539600  | -3.98936200 | 1.48904500  | C | -4.62442500 | 3.33832100  | 1.30803100  |
| C | 4.31590700  | -4.21694700 | 2.59504300  | N | -3.42871900 | 3.10085100  | 0.79848500  |

|    |             |             |             |   |             |             |             |
|----|-------------|-------------|-------------|---|-------------|-------------|-------------|
| C  | -3.15304600 | -3.46214700 | -4.82695900 | H | 2.72287200  | -3.48738700 | -0.86088800 |
| C  | -4.28560700 | -3.29071300 | -3.82681500 | H | 1.26549800  | -3.88200400 | 1.13991700  |
| O  | -5.41022900 | -3.72850900 | -4.05654500 | H | 6.75883400  | -6.25558900 | 1.68891200  |
| N  | -3.94896000 | -2.63313200 | -2.67780800 | H | -5.99455500 | 4.73620600  | -2.27128700 |
| C  | -4.77432500 | -2.76161800 | -1.48723400 | H | -4.33091600 | 5.23104000  | -2.59723800 |
| C  | -5.02742100 | -1.38369700 | -0.86831200 | H | -2.53404100 | 3.67222900  | -1.06723800 |
| O  | -4.11237500 | -0.77909000 | -0.27250700 | H | -4.98792000 | 2.96907700  | 2.25457900  |
| C  | -4.10791300 | -3.69891000 | -0.45958700 | H | -2.83613300 | -4.51047400 | -4.78696300 |
| O  | -3.96043400 | -4.95779200 | -1.07108100 | H | -4.75944200 | -3.75159600 | 0.43244600  |
| N  | -6.25573800 | -0.83001700 | -0.95156600 | H | -3.15448900 | -3.26363700 | -0.13705200 |
| C  | -7.46257100 | -1.35276500 | -1.64546500 | H | -3.15561700 | -5.39843200 | -0.73699000 |
| C  | -7.37031600 | -1.18147800 | -3.16468400 | H | -5.70046500 | -3.22998500 | -1.82025000 |
| C  | -8.58235200 | -0.51544900 | -0.99683700 | H | -2.98873500 | -2.30631800 | -2.55685400 |
| C  | -7.92292900 | 0.85169000  | -0.75539500 | H | -8.87609800 | -0.96410100 | -0.04116800 |
| C  | -6.49115900 | 0.48865100  | -0.33696800 | H | -9.47170500 | -0.46190900 | -1.62927800 |
| C  | -0.24995900 | 2.74904400  | -4.54371400 | H | -8.43956300 | 1.44470900  | 0.00465000  |
| C  | 4.59842000  | 0.60622700  | -5.76139800 | H | -7.91329900 | 1.43624700  | -1.68122200 |
| C  | 3.96772400  | -0.10719500 | -4.56875400 | H | -6.38919300 | 0.40310400  | 0.75234500  |
| S  | 4.85493500  | -1.69045600 | -4.20515000 | H | -5.73565100 | 1.20333900  | -0.67439900 |
| C  | 0.59608100  | -5.00818500 | -2.89919100 | H | -7.59043600 | -2.41199800 | -1.40701200 |
| C  | 1.03085100  | -3.73353300 | -3.61289300 | H | -0.06659800 | 1.75008800  | -4.95488600 |
| O  | 1.82108600  | -2.93488400 | -3.08272300 | H | -1.19534500 | 3.09349200  | -4.96981400 |
| C  | -0.30166500 | -4.71546300 | -1.67750700 | H | 2.92267900  | -0.35069300 | -4.77045300 |
| C  | -0.47745900 | -5.88721100 | -0.71950900 | H | 3.99235100  | 0.52493800  | -3.67639300 |
| O  | -1.58717200 | -6.24967000 | -0.32151200 | H | 3.77387700  | -2.35894800 | -3.74584700 |
| N  | 0.65417200  | -6.52154200 | -0.30828300 | H | 5.65814900  | 0.81981500  | -5.58508900 |
| N  | 0.54483100  | -3.53823100 | -4.85546900 | H | 0.11329200  | -3.87554000 | -1.10957600 |
| C  | 0.80013800  | -2.31805100 | -5.61153100 | H | -1.30033500 | -4.41489500 | -1.99496600 |
| Zn | -1.87321700 | 2.02008300  | 1.74874600  | H | 0.53720200  | -7.19448700 | 0.43667100  |
| Zn | 0.82039300  | 3.32669700  | -0.11976800 | H | 1.55215800  | -6.06169300 | -0.36480400 |
| H  | 0.14605200  | 9.28776200  | -2.31828900 | H | 0.08380700  | -5.69366200 | -3.58265700 |
| H  | 1.89803700  | 9.16384600  | -2.08476700 | H | 0.43744100  | -1.44755600 | -5.05596100 |
| H  | 0.87560400  | 5.53064400  | -2.62400000 | H | 1.87003400  | -2.20506100 | -5.80372800 |
| H  | 0.38398700  | 6.12153300  | 1.50397400  | H | -0.15505700 | -4.17723700 | -5.20027600 |
| H  | 6.33981600  | 1.24822000  | -2.08553600 | H | -0.14704700 | 4.37817200  | 5.61676800  |
| H  | 5.76475100  | 2.52748700  | -3.15850200 | H | -1.29281200 | 5.22548800  | 4.56217800  |
| H  | 3.06142600  | 2.99230300  | -2.49347300 | H | -3.41248400 | 2.62861800  | 6.07407300  |
| H  | 3.40912700  | 2.74014900  | 1.67423400  | H | -1.99443300 | 2.74685600  | 5.00789900  |
| H  | 8.74560000  | -0.91575800 | 0.86823300  | H | -4.45835500 | 0.00765900  | 5.92947000  |
| H  | 8.18293200  | 0.02304200  | -0.50568600 | H | -3.42708400 | -0.74087400 | 1.89344500  |
| H  | 10.09740600 | 1.06836800  | 1.66315200  | H | -4.46400800 | -1.68654100 | 4.00594900  |
| H  | 9.53298600  | 1.99842700  | 0.28059100  | H | 0.27491900  | -2.38214400 | -6.56523700 |
| H  | 6.79716800  | 0.88762100  | 3.83600900  | H | 1.52029900  | -5.50464900 | -2.58813700 |
| H  | 8.49381300  | 0.37783800  | 3.73728200  | H | -7.16614900 | -0.13994900 | -3.43402900 |
| H  | 7.25626000  | -0.40890100 | 2.71042600  | H | -6.59787000 | -1.82376300 | -3.59070200 |
| H  | 10.56911600 | 0.22678300  | -1.33745700 | H | -8.32164100 | -1.47156100 | -3.62381100 |
| H  | 7.11550400  | -3.27276900 | 1.02495100  | H | 1.11359600  | 8.27121700  | -3.39197400 |
| H  | 6.95072900  | -3.93004000 | 2.65087000  | H | 6.86740400  | 2.92146000  | -1.83567700 |
| H  | 4.76542600  | -4.41783300 | 3.56491100  | H | 5.72399100  | 2.21923600  | 0.67612300  |
| H  | 5.17713400  | -3.54703200 | -0.62088900 | H | 0.59620700  | 8.40269200  | 0.42267700  |
| H  | 2.29309900  | -4.35017600 | 3.33543900  | H | -5.34533900 | 6.20570100  | -1.52508300 |

|   |             |             |             |   |             |             |             |
|---|-------------|-------------|-------------|---|-------------|-------------|-------------|
| H | -6.30608200 | 4.40853000  | 0.61990300  | C | -1.03148300 | -5.01764700 | 3.78636900  |
| H | 11.13065500 | -0.70791100 | 0.05550700  | C | -0.58866100 | -2.27277300 | 3.66470300  |
| H | 10.09294600 | -1.46651200 | -1.15851300 | C | -1.30711200 | -4.33046600 | 2.60999800  |
| H | 8.27510100  | -5.48304400 | 1.19614100  | C | -1.08594100 | -2.94542400 | 2.53782900  |
| H | 6.92164900  | -5.59311100 | 0.05911200  | O | -1.35918100 | -2.31913100 | 1.36763400  |
| H | -3.53276900 | -3.27127300 | -5.83320800 | H | 0.05693300  | -2.44712200 | 5.70435900  |
| H | -2.29830800 | -2.81733300 | -4.61109800 | H | -1.20860100 | -6.09059100 | 3.82223000  |
| H | 4.53096500  | -0.00332500 | -6.66655000 | H | -0.40463900 | -1.20414000 | 3.60838200  |
| H | 4.09254800  | 1.56027800  | -5.94917800 | H | -1.68501000 | -4.85337100 | 1.73769100  |
| H | -3.52702700 | 3.43875100  | 4.50408400  | H | -1.16560700 | -1.33184700 | 1.41405100  |
| H | 1.54390600  | 5.08752500  | 3.70386900  | C | -0.34708400 | 2.63366900  | -3.06566500 |
| H | 0.06934300  | 6.10834500  | 5.27851700  | O | 0.57874900  | 2.98275400  | -2.32646900 |
| H | 0.56575900  | 3.40852400  | -4.84122300 | O | -1.48966500 | 2.09884300  | -2.70302500 |
| C | 1.75483500  | -0.34519500 | 0.86261600  | N | -1.37893600 | 0.06358400  | -0.98279000 |
| H | 2.74132800  | -0.67355900 | 0.52147100  | C | -0.69330400 | -0.94222800 | -1.66830200 |
| H | 1.88617100  | 0.47152300  | 1.57750000  | O | -1.18704600 | -1.70383300 | -2.50944800 |
| H | 1.27533800  | -1.17587500 | 1.37989700  | N | 0.60318700  | -0.91908400 | -1.27876500 |
| C | -1.65785100 | -5.49191600 | 6.89134400  | C | 0.90689900  | 0.12649200  | -0.30922000 |
| C | -0.32826900 | -5.12472300 | 6.21516100  | C | -0.52405600 | 0.64264600  | 0.10465800  |
| H | 0.23898000  | -6.04403500 | 6.02006300  | O | -0.96928000 | 0.25897100  | 1.33007100  |
| H | 0.28058900  | -4.52694400 | 6.90367400  | H | 1.41672700  | 0.94678100  | -0.82324500 |
| H | -2.23250900 | -4.59184200 | 7.13437100  | H | -2.33172200 | -0.20365600 | -0.70886600 |
| H | -2.27575900 | -6.11080800 | 6.23306600  | H | 1.28069700  | -1.48935400 | -1.77494300 |
| H | -1.49345400 | -6.04961600 | 7.81974900  | O | -0.63991500 | 2.05279000  | 0.03864000  |
| C | -0.53978300 | -4.36285900 | 4.92629000  | H | -1.44295600 | 1.58811600  | -1.83416200 |
| C | -0.32514700 | -2.98303300 | 4.83781700  |   |             |             |             |

**(5R)-MeHYD-INT2-II (*SmDHPase*)**

|   |             |             |             |   |             |             |             |
|---|-------------|-------------|-------------|---|-------------|-------------|-------------|
| C | 0.73647300  | 8.65419100  | -2.34214000 | C | 3.08818600  | -4.05336100 | 2.46865600  |
| C | 0.57337000  | 7.45635700  | -1.45874900 | C | 3.29343500  | -3.60325600 | 0.10155300  |
| N | 0.39403100  | 7.56453700  | -0.08795200 | C | 2.49280100  | -3.84196200 | 1.22342500  |
| C | 0.57987000  | 6.10408700  | -1.69402600 | C | -0.40812900 | 5.16204600  | 4.85551600  |
| C | 0.31252000  | 6.32389300  | 0.44599200  | N | 0.39201100  | 4.92537700  | 3.67047600  |
| N | 0.41941300  | 5.40838700  | -0.50528900 | C | 0.10015300  | 3.91938400  | 2.77346200  |
| C | 5.96339300  | 2.52108100  | -2.09613200 | O | -1.03488500 | 3.35712100  | 2.89087500  |
| C | 4.76694100  | 2.71533700  | -1.23083200 | O | 0.98821400  | 3.70052700  | 1.88960400  |
| N | 4.81786700  | 2.64300700  | 0.15019300  | C | -3.15194600 | 2.50705600  | 5.03453200  |
| C | 3.45552100  | 2.98030600  | -1.52634300 | C | -3.49030300 | 1.19868900  | 4.40651500  |
| C | 3.57731000  | 2.86181800  | 0.63600500  | N | -3.14627500 | 0.92580400  | 3.09257300  |
| N | 2.72236300  | 3.06670200  | -0.35708300 | C | -4.10729200 | 0.09615100  | 4.93626500  |
| C | 10.31422900 | -0.16713100 | -0.57434700 | C | -3.54251700 | -0.31436700 | 2.83286100  |
| C | 8.97844600  | 0.18309400  | 0.09690700  | N | -4.13467700 | -0.84458100 | 3.92274200  |
| C | 9.14738100  | 1.25217600  | 1.17937700  | C | -5.24334400 | 5.02897300  | -1.82754600 |
| S | 7.61604500  | 1.78758500  | 2.05217200  | C | -4.71215100 | 4.23998900  | -0.66927600 |
| C | 7.14540800  | 0.26446300  | 2.94929800  | N | -5.44101900 | 4.02610300  | 0.49284700  |
| C | 7.38380000  | -5.16278900 | 1.13241200  | C | -3.52097700 | 3.59225000  | -0.44979000 |
| C | 6.80154100  | -3.81621500 | 1.58842700  | C | -4.69228800 | 3.28142000  | 1.34336200  |
| C | 5.29379900  | -3.78455600 | 1.47567300  | N | -3.51958100 | 3.00240700  | 0.80246500  |
| C | 4.47794700  | -4.02481200 | 2.58946600  | C | -2.99772800 | -3.54030300 | -4.83180400 |
| C | 4.68247400  | -3.57380700 | 0.23255600  | C | -4.14372600 | -3.41398100 | -3.84027000 |

|    |             |             |             |   |             |             |             |
|----|-------------|-------------|-------------|---|-------------|-------------|-------------|
| O  | -5.25121800 | -3.88774000 | -4.08009100 | H | 6.99089600  | -5.98298300 | 1.74136300  |
| N  | -3.83672900 | -2.75166200 | -2.68590600 | H | -6.17231800 | 4.60049200  | -2.21964100 |
| C  | -4.66597300 | -2.90246400 | -1.50108100 | H | -4.51066700 | 5.02966100  | -2.63673800 |
| C  | -4.94767500 | -1.52873400 | -0.88539200 | H | -2.68024400 | 3.47789900  | -1.11507900 |
| O  | -4.04271700 | -0.90410100 | -0.29396900 | H | -5.03003100 | 2.95494700  | 2.31483300  |
| C  | -3.98535200 | -3.82714400 | -0.47135200 | H | -2.64026900 | -4.57549700 | -4.79044600 |
| O  | -3.80263600 | -5.07925700 | -1.08740200 | H | -4.64291200 | -3.89945100 | 0.41485100  |
| N  | -6.18596900 | -1.00019100 | -0.97144300 | H | -3.04538000 | -3.37033100 | -0.13934700 |
| C  | -7.38255600 | -1.55593600 | -1.65831300 | H | -2.99501300 | -5.50633500 | -0.74306600 |
| C  | -7.29445000 | -1.40492600 | -3.18003800 | H | -5.57991100 | -3.38981100 | -1.84026200 |
| C  | -8.51882900 | -0.73216700 | -1.02077700 | H | -2.89043300 | -2.39163500 | -2.55882800 |
| C  | -7.88577200 | 0.64954400  | -0.79245500 | H | -8.80643500 | -1.17590400 | -0.06093000 |
| C  | -6.44923700 | 0.31774300  | -0.36534700 | H | -9.40760800 | -0.70210200 | -1.65555800 |
| C  | -0.30726300 | 2.76532000  | -4.53593000 | H | -8.41544100 | 1.24133400  | -0.04058800 |
| C  | 4.61427600  | 0.78871700  | -5.74120600 | H | -7.88356800 | 1.22419900  | -1.72450800 |
| C  | 3.96947600  | 0.04121000  | -4.57769800 | H | -6.35124200 | 0.24030000  | 0.72487000  |
| S  | 4.85099600  | -1.55565800 | -4.27285400 | H | -5.70612700 | 1.04516100  | -0.70318100 |
| C  | 0.72954400  | -4.98043200 | -2.91429000 | H | -7.48944300 | -2.61404100 | -1.40448800 |
| C  | 1.13973900  | -3.68583100 | -3.60706300 | H | -0.08260400 | 1.79321600  | -4.98885500 |
| O  | 1.89271500  | -2.86994800 | -3.04955100 | H | -1.25826700 | 3.09424800  | -4.96225100 |
| C  | -0.17180000 | -4.72551000 | -1.68694600 | H | 2.92422300  | -0.18622100 | -4.79779600 |
| C  | -0.30022900 | -5.90398300 | -0.72968400 | H | 3.99320100  | 0.64254500  | -3.66428700 |
| O  | -1.39382900 | -6.30540000 | -0.32505100 | H | 3.81433700  | -2.18239200 | -3.67294200 |
| N  | 0.85585900  | -6.49634400 | -0.32392900 | H | 5.67203600  | 0.99518400  | -5.54706400 |
| N  | 0.67694800  | -3.49315100 | -4.85832500 | H | 0.21489900  | -3.87360600 | -1.11693800 |
| C  | 0.91669600  | -2.26250200 | -5.60425200 | H | -1.18276900 | -4.46183300 | -1.99830300 |
| Zn | -1.93602600 | 1.96862300  | 1.76102700  | H | 0.76832100  | -7.17486300 | 0.41992800  |
| Zn | 0.71904500  | 3.36980700  | -0.13098800 | H | 1.73787100  | -6.00798500 | -0.38987700 |
| H  | -0.13528100 | 9.31631200  | -2.29521900 | H | 0.23056500  | -5.66556400 | -3.60775300 |
| H  | 1.62010700  | 9.24033500  | -2.06640700 | H | 0.52456600  | -1.40413200 | -5.05022300 |
| H  | 0.70110500  | 5.57994500  | -2.62860400 | H | 1.98692200  | -2.12441500 | -5.77760200 |
| H  | 0.20066500  | 6.13555400  | 1.50339800  | H | 0.01073500  | -4.15425300 | -5.22718900 |
| H  | 6.33540700  | 1.49125400  | -2.05039000 | H | -0.27685500 | 4.38904200  | 5.62416400  |
| H  | 5.70905400  | 2.73496600  | -3.13637000 | H | -1.46229900 | 5.19268500  | 4.57945100  |
| H  | 2.98344300  | 3.10274200  | -2.48755500 | H | -3.49602200 | 2.53690900  | 6.07183700  |
| H  | 3.31687800  | 2.87110000  | 1.68221700  | H | -2.07505700 | 2.68031800  | 5.01219100  |
| H  | 8.54435000  | -0.72307400 | 0.53548100  | H | -4.50691700 | -0.10039800 | 5.91812100  |
| H  | 8.26345400  | 0.53801200  | -0.65441000 | H | -3.41555100 | -0.83489800 | 1.89445300  |
| H  | 9.85792300  | 0.92435800  | 1.94605300  | H | -4.46551300 | -1.79519200 | 3.99634000  |
| H  | 9.54721400  | 2.17704400  | 0.75016400  | H | 0.40813000  | -2.33389700 | -6.56636100 |
| H  | 6.30807200  | 0.52744600  | 3.59885500  | H | 1.66405400  | -5.46356100 | -2.61246800 |
| H  | 7.97616800  | -0.07611500 | 3.57178600  | H | -7.11189900 | -0.36331100 | -3.46425400 |
| H  | 6.83184500  | -0.53192100 | 2.27251000  | H | -6.50960400 | -2.03670500 | -3.59916800 |
| H  | 10.76162400 | 0.71032500  | -1.05361700 | H | -8.24033700 | -1.72046500 | -3.63350800 |
| H  | 7.23550900  | -3.01389300 | 0.97697700  | H | 0.85823800  | 8.33727000  | -3.37974100 |
| H  | 7.10141900  | -3.62168800 | 2.62495500  | H | 6.78338800  | 3.18806400  | -1.80868800 |
| H  | 4.93866400  | -4.19103100 | 3.56062500  | H | 5.65043100  | 2.41505700  | 0.69933900  |
| H  | 5.30001900  | -3.38017300 | -0.64198500 | H | 0.34375300  | 8.42751200  | 0.43364100  |
| H  | 2.46495000  | -4.22744300 | 3.34069400  | H | -5.44326400 | 6.07095700  | -1.55297800 |
| H  | 2.84372000  | -3.42196900 | -0.87153300 | H | -6.37542100 | 4.36203000  | 0.67538600  |
| H  | 1.41114400  | -3.84177600 | 1.14143200  | H | 11.03611300 | -0.55344000 | 0.15304000  |



|   |             |             |             |   |             |             |             |
|---|-------------|-------------|-------------|---|-------------|-------------|-------------|
| H | 10.17391700 | -0.93221800 | -1.34337900 | C | -0.52964900 | -2.28588000 | 3.64347600  |
| H | 8.47564800  | -5.17169200 | 1.21596500  | C | -1.14394900 | -4.38173600 | 2.59854800  |
| H | 7.12308500  | -5.36935200 | 0.08975600  | C | -0.98640200 | -2.98853100 | 2.51768100  |
| H | -3.37736400 | -3.36332100 | -5.84059000 | O | -1.27632700 | -2.38305500 | 1.34010900  |
| H | -2.17034200 | -2.86302100 | -4.60977300 | H | 0.10789800  | -2.41582000 | 5.68889100  |
| H | 4.55408600  | 0.20763700  | -6.66539600 | H | -0.97314300 | -6.12696200 | 3.82434700  |
| H | 4.11100100  | 1.74825400  | -5.90583600 | H | -0.39582700 | -1.21018000 | 3.58114000  |
| H | -3.61705600 | 3.34361900  | 4.50105800  | H | -1.49455100 | -4.92726200 | 1.72871500  |
| H | 1.37070100  | 5.17283600  | 3.70028500  | H | -1.15038700 | -1.38511600 | 1.39070900  |
| H | -0.13046500 | 6.12693500  | 5.28729500  | C | -0.42594000 | 2.58008900  | -3.06336700 |
| H | 0.48762100  | 3.46653100  | -4.79275700 | O | 0.47648900  | 2.95773900  | -2.30215500 |
| C | 1.75281100  | -0.27419200 | 0.90171500  | O | -1.53433100 | 1.97004600  | -2.74048300 |
| H | 2.75180800  | -0.57626900 | 0.57277700  | N | -1.36792400 | 0.08230800  | -1.02050600 |
| H | 1.85391900  | 0.55164700  | 1.61094200  | C | -0.64558700 | -0.94435200 | -1.66785000 |
| H | 1.29115400  | -1.11413800 | 1.42012400  | O | -1.11456100 | -1.71729800 | -2.50836600 |
| C | -1.46800600 | -5.52758000 | 6.88932500  | N | 0.63303400  | -0.89920400 | -1.24087100 |
| C | -0.15338000 | -5.10498100 | 6.21605400  | C | 0.90406800  | 0.16624500  | -0.28116100 |
| H | 0.45612300  | -5.99888600 | 6.03055800  | C | -0.54044100 | 0.65309700  | 0.11585500  |
| H | 0.42417600  | -4.47509400 | 6.90292100  | O | -1.01024400 | 0.21047600  | 1.30926400  |
| H | -2.08430900 | -4.65298500 | 7.12310600  | H | 1.39876600  | 0.99039000  | -0.80339200 |
| H | -2.05402800 | -6.17885500 | 6.23310200  | H | -2.30928000 | -0.22685400 | -0.74038300 |
| H | -1.28241700 | -6.07036300 | 7.82252700  | H | 1.32676700  | -1.47953000 | -1.70366300 |
| C | -0.39215400 | -4.36281700 | 4.92033000  | O | -0.68211800 | 2.04890900  | 0.09701700  |
| C | -0.24200000 | -2.97506500 | 4.82349100  | H | -1.48107000 | 1.31496600  | -1.91973000 |
| C | -0.84493700 | -5.04731700 | 3.78173800  |   |             |             |             |

**(5R)-MeHYD-TS3-II (SmDHPase)**

|   |             |             |             |   |             |             |             |
|---|-------------|-------------|-------------|---|-------------|-------------|-------------|
| C | 0.54926300  | 8.67531400  | -2.30145000 | C | 3.38410800  | -3.54165000 | 0.09028400  |
| C | 0.40370800  | 7.48098500  | -1.41550900 | C | 2.58881200  | -3.80197000 | 1.21114100  |
| N | 0.22971400  | 7.58613600  | -0.04382400 | C | -0.52413200 | 5.13120200  | 4.88176400  |
| C | 0.42770600  | 6.13083100  | -1.65425100 | N | 0.26952400  | 4.92314700  | 3.68561600  |
| C | 0.16891200  | 6.34320100  | 0.48833900  | C | 0.00734000  | 3.90549900  | 2.78924500  |
| N | 0.28405800  | 5.43297700  | -0.46623700 | O | -1.10181200 | 3.29470000  | 2.92978300  |
| C | 5.91983800  | 2.66709500  | -2.06804300 | O | 0.88580200  | 3.72400300  | 1.89043300  |
| C | 4.70841600  | 2.82625600  | -1.21398500 | C | -3.20446500 | 2.41123700  | 5.04656000  |
| N | 4.74895600  | 2.74630400  | 0.16739900  | C | -3.51670300 | 1.09902900  | 4.41234100  |
| C | 3.39339400  | 3.06541300  | -1.51838800 | N | -3.14770000 | 0.82947100  | 3.10468500  |
| C | 3.49960000  | 2.93681900  | 0.64422800  | C | -4.13019900 | -0.01054600 | 4.93163500  |
| N | 2.64884900  | 3.12981200  | -0.35436600 | C | -3.52697800 | -0.41400000 | 2.83778400  |
| C | 10.33070100 | 0.07742000  | -0.54818800 | N | -4.13101200 | -0.95132200 | 3.91779100  |
| C | 8.95886200  | 0.41864700  | 0.05039700  | C | -5.34369100 | 4.90742400  | -1.81018200 |
| C | 9.07388200  | 1.33494900  | 1.27097500  | C | -4.79100000 | 4.14845400  | -0.64189600 |
| S | 7.48760000  | 1.79043400  | 2.09334900  | N | -5.47814300 | 4.01051100  | 0.55666900  |
| C | 6.98176100  | 0.20080600  | 2.86942800  | C | -3.61313300 | 3.46937000  | -0.44404000 |
| C | 7.51681000  | -4.99244500 | 1.13571300  | C | -4.72032000 | 3.27692400  | 1.40828600  |
| C | 6.89500200  | -3.66017400 | 1.58115000  | N | -3.58094000 | 2.93353400  | 0.83328600  |
| C | 5.38721800  | -3.67037600 | 1.46624600  | C | -2.89034800 | -3.59533400 | -4.84087300 |
| C | 4.57671400  | -3.93283200 | 2.57913400  | C | -4.04304400 | -3.50988600 | -3.85298200 |
| C | 4.77179100  | -3.47529200 | 0.22259600  | O | -5.13654100 | -4.01167500 | -4.09680400 |
| C | 3.18834300  | -3.99832300 | 2.45690800  | N | -3.75437900 | -2.84744800 | -2.69430400 |

|    |             |             |             |   |             |             |             |
|----|-------------|-------------|-------------|---|-------------|-------------|-------------|
| C  | -4.58922600 | -2.99513000 | -1.51419800 | H | -4.64902500 | 4.84170500  | -2.64962800 |
| C  | -4.87321400 | -1.61407700 | -0.91723600 | H | -2.80607000 | 3.29571300  | -1.14030200 |
| O  | -3.96250200 | -0.97626400 | -0.34581400 | H | -5.02929800 | 3.00886400  | 2.40689100  |
| C  | -3.91331200 | -3.91063500 | -0.47303600 | H | -2.49468700 | -4.61658500 | -4.79943400 |
| O  | -3.72803900 | -5.16847000 | -1.07545600 | H | -4.57527700 | -3.97507700 | 0.41048300  |
| N  | -6.11267700 | -1.09316700 | -1.00183400 | H | -2.97517900 | -3.45086100 | -0.14012100 |
| C  | -7.31295700 | -1.67448100 | -1.66252700 | H | -2.90421700 | -5.57760200 | -0.74900900 |
| C  | -7.23928100 | -1.56843400 | -3.18906800 | H | -5.49942200 | -3.48789600 | -1.85502700 |
| C  | -8.44807900 | -0.83774300 | -1.03965200 | H | -2.82453800 | -2.45155500 | -2.57139800 |
| C  | -7.81907700 | 0.55172200  | -0.85057800 | H | -8.72907300 | -1.25755100 | -0.06714100 |
| C  | -6.37948200 | 0.23700000  | -0.42238200 | H | -9.34036700 | -0.82741700 | -1.67008000 |
| C  | -0.35077800 | 2.77123900  | -4.51792600 | H | -8.34668800 | 1.16081200  | -0.11136900 |
| C  | 4.61828400  | 0.91629600  | -5.72159400 | H | -7.82378400 | 1.10250100  | -1.79686600 |
| C  | 3.97708900  | 0.14994400  | -4.56860100 | H | -6.27645100 | 0.18296700  | 0.66859900  |
| S  | 4.86783900  | -1.44652300 | -4.28816800 | H | -5.64169600 | 0.96037100  | -0.77936100 |
| C  | 0.83191500  | -4.95382600 | -2.92263700 | H | -7.41197700 | -2.72496900 | -1.37568900 |
| C  | 1.21627900  | -3.64543600 | -3.60328400 | H | -0.16369000 | 1.77591700  | -4.93618100 |
| O  | 1.93162600  | -2.80864400 | -3.02590000 | H | -1.27877200 | 3.12861000  | -4.97165900 |
| C  | -0.08336200 | -4.72629100 | -1.70037300 | H | 2.93271900  | -0.07811400 | -4.79242200 |
| C  | -0.19117400 | -5.91298100 | -0.75005000 | H | 3.99897500  | 0.73814100  | -3.64676300 |
| O  | -1.27791900 | -6.34130100 | -0.35564200 | H | 3.84656700  | -2.07934700 | -3.66908800 |
| N  | 0.97550600  | -6.48037200 | -0.34009900 | H | 5.67451500  | 1.12695400  | -5.52383500 |
| N  | 0.77164800  | -3.45984300 | -4.86093700 | H | 0.27924000  | -3.86989000 | -1.12091100 |
| C  | 0.99393100  | -2.22226200 | -5.60193200 | H | -1.09876800 | -4.48613500 | -2.01743300 |
| Zn | -1.98120700 | 1.91471200  | 1.77790800  | H | 0.89974400  | -7.16805300 | 0.39658200  |
| Zn | 0.62747600  | 3.40354900  | -0.16499100 | H | 1.84810600  | -5.97483700 | -0.40070600 |
| H  | -0.32819500 | 9.33002200  | -2.25281000 | H | 0.35343500  | -5.64589900 | -3.62347300 |
| H  | 1.42856600  | 9.27208900  | -2.03408700 | H | 0.57799000  | -1.37390200 | -5.05060100 |
| H  | 0.55053100  | 5.60713800  | -2.58875000 | H | 2.06271200  | -2.06121400 | -5.76417700 |
| H  | 0.06339500  | 6.14929700  | 1.54534600  | H | 0.14563600  | -4.14687600 | -5.25213000 |
| H  | 6.32328600  | 1.64961500  | -2.01557600 | H | -0.36224000 | 4.35887300  | 5.64533700  |
| H  | 5.66895000  | 2.87109200  | -3.11110600 | H | -1.58201400 | 5.13334100  | 4.61809900  |
| H  | 2.92392700  | 3.18635000  | -2.48129300 | H | -3.55970700 | 2.43291200  | 6.08028600  |
| H  | 3.23062500  | 2.93685500  | 1.68843900  | H | -2.13035300 | 2.60116000  | 5.03452200  |
| H  | 8.44216800  | -0.50762000 | 0.32970100  | H | -4.54377400 | -0.21169600 | 5.90676400  |
| H  | 8.33106900  | 0.90462400  | -0.70518300 | H | -3.37806200 | -0.93068900 | 1.90069900  |
| H  | 9.72312300  | 0.89736300  | 2.03641300  | H | -4.45488500 | -1.90471000 | 3.98573000  |
| H  | 9.51619100  | 2.29740600  | 0.99322500  | H | 0.49619600  | -2.30207300 | -6.56893100 |
| H  | 7.00429400  | 0.30185700  | 3.95555100  | H | 1.77486400  | -5.41759000 | -2.61667000 |
| H  | 7.67074200  | -0.59012500 | 2.56984600  | H | -7.06807300 | -0.53421800 | -3.50535600 |
| H  | 5.97720400  | -0.07574800 | 2.54591000  | H | -6.45338500 | -2.20487800 | -3.59913000 |
| H  | 10.86184300 | 0.98005800  | -0.86879100 | H | -8.18715800 | -1.90411200 | -3.62338600 |
| H  | 7.30614200  | -2.84969400 | 0.96509200  | H | 0.66790300  | 8.35579300  | -3.33865000 |
| H  | 7.18699200  | -3.45059400 | 2.61717500  | H | 6.71540500  | 3.36032300  | -1.77402900 |
| H  | 5.04051000  | -4.08739600 | 3.55071800  | H | 5.58024600  | 2.52593900  | 0.72096800  |
| H  | 5.38493600  | -3.26488600 | -0.65110800 | H | 0.16928900  | 8.44777100  | 0.47871900  |
| H  | 2.56920400  | -4.18956800 | 3.32825700  | H | -5.48950800 | 5.96784600  | -1.57478800 |
| H  | 2.93071600  | -3.37202100 | -0.88323800 | H | -6.39086500 | 4.38963300  | 0.76257100  |
| H  | 1.50758700  | -3.83060600 | 1.12827800  | H | 10.96516000 | -0.44108100 | 0.17856800  |
| H  | 7.14679000  | -5.81960600 | 1.74950100  | H | 10.22225700 | -0.57355100 | -1.42048400 |
| H  | -6.30608100 | 4.50112600  | -2.14057800 | H | 8.60820700  | -4.96878600 | 1.22149700  |

|   |             |             |             |   |             |             |             |
|---|-------------|-------------|-------------|---|-------------|-------------|-------------|
| H | 7.26468200  | -5.21373100 | 0.09395400  | C | -1.02875400 | -4.44616300 | 2.58161500  |
| H | -3.27450700 | -3.43289000 | -5.85035800 | C | -0.90772600 | -3.05055700 | 2.48551800  |
| H | -2.08888500 | -2.88782600 | -4.61960900 | O | -1.19789200 | -2.46617900 | 1.29562800  |
| H | 4.56203100  | 0.34732900  | -6.65355600 | H | 0.14152500  | -2.41068000 | 5.65862300  |
| H | 4.10853100  | 1.87429600  | -5.87360100 | H | -0.81888200 | -6.17185000 | 3.82872800  |
| H | -3.67622400 | 3.24265800  | 4.51104500  | H | -0.37967500 | -1.24388300 | 3.53389000  |
| H | 1.23851500  | 5.20724900  | 3.70434500  | H | -1.36069300 | -5.01075300 | 1.71663100  |
| H | -0.26884700 | 6.10179700  | 5.31454200  | H | -1.12024300 | -1.46380400 | 1.34423000  |
| H | 0.47833800  | 3.42832800  | -4.78569200 | C | -0.51315600 | 2.63922800  | -3.03490000 |
| C | 1.73968600  | -0.24895100 | 0.90023800  | O | 0.40446000  | 3.04492900  | -2.28263400 |
| H | 2.74770300  | -0.52406300 | 0.57541300  | O | -1.61289600 | 2.06940300  | -2.68780800 |
| H | 1.81634700  | 0.57265300  | 1.61703400  | N | -1.36918200 | 0.11195000  | -1.05732800 |
| H | 1.29281700  | -1.10433000 | 1.40597800  | C | -0.61486000 | -0.92334800 | -1.71615100 |
| C | -1.33342200 | -5.58778600 | 6.87579500  | O | -1.07843800 | -1.67680400 | -2.56866900 |
| C | -0.03571400 | -5.10171500 | 6.21247000  | N | 0.64215300  | -0.87385600 | -1.25421400 |
| H | 0.62076700  | -5.96442200 | 6.03950800  | C | 0.89098900  | 0.18883600  | -0.28234400 |
| H | 0.50161300  | -4.43911000 | 6.90108800  | C | -0.56327300 | 0.64741800  | 0.11128100  |
| H | -1.99611700 | -4.74507600 | 7.09952300  | O | -1.05188200 | 0.13980600  | 1.26663300  |
| H | -1.87931900 | -6.27190000 | 6.21842800  | H | 1.37499300  | 1.02231900  | -0.79883100 |
| H | -1.12835800 | -6.11552300 | 7.81343700  | H | -2.30052500 | -0.24104500 | -0.77503900 |
| C | -0.29506800 | -4.38008600 | 4.90868600  | H | 1.34444200  | -1.46702600 | -1.69126900 |
| C | -0.18504300 | -2.98969700 | 4.79720100  | O | -0.71608000 | 2.02777100  | 0.14768700  |
| C | -0.72028600 | -5.08964400 | 3.77476100  | H | -1.51863500 | 1.14479500  | -1.84970200 |
| C | -0.48224700 | -2.32232200 | 3.60690300  |   |             |             |             |

**(5R)-MeHYD-EP-II (*SmDHPase*)**

|   |             |             |             |   |             |             |             |
|---|-------------|-------------|-------------|---|-------------|-------------|-------------|
| C | 1.91235300  | 8.47573100  | -2.49470000 | C | 2.12255600  | -3.83200300 | 1.27035900  |
| C | 1.53619200  | 7.41036100  | -1.53798100 | C | 0.31389600  | 5.33814600  | 4.77935900  |
| N | 1.32938500  | 7.61565000  | -0.18301900 | N | 1.05732300  | 4.99094300  | 3.57928900  |
| C | 1.36462700  | 6.06954300  | -1.72104000 | C | 0.64367600  | 4.01055700  | 2.70191800  |
| C | 1.06274100  | 6.42274900  | 0.39975100  | O | -0.54550700 | 3.56792100  | 2.88493900  |
| N | 1.07527300  | 5.46581000  | -0.51393400 | O | 1.45152200  | 3.67591000  | 1.78976300  |
| C | 6.27272200  | 1.70665300  | -2.09094200 | C | -2.76009800 | 3.07857500  | 5.01271600  |
| C | 5.12994000  | 2.12895900  | -1.23705600 | C | -3.28733900 | 1.85404300  | 4.32713100  |
| N | 5.17675600  | 2.14243700  | 0.14607600  | N | -2.88162100 | 1.48098900  | 3.04892300  |
| C | 3.86994100  | 2.55737500  | -1.55787000 | C | -4.19026100 | 0.92404700  | 4.77343800  |
| C | 3.98153800  | 2.56777600  | 0.61044600  | C | -3.52836200 | 0.36168900  | 2.73519900  |
| N | 3.16171600  | 2.82350600  | -0.40088000 | N | -4.32743200 | -0.00053400 | 3.75457400  |
| C | 10.22577500 | -1.50230300 | -0.49467500 | C | -4.49816200 | 5.69522500  | -1.91219600 |
| C | 8.94198300  | -0.93455000 | 0.12794800  | C | -4.11228900 | 4.88768400  | -0.71855400 |
| C | 9.24181700  | 0.06938400  | 1.24388700  | N | -4.91516700 | 4.73066700  | 0.40320900  |
| S | 7.78412200  | 0.82857300  | 2.07678300  | C | -2.98688800 | 4.15480400  | -0.45238800 |
| C | 7.02296100  | -0.62009000 | 2.89477800  | C | -4.27555300 | 3.92889600  | 1.28511100  |
| C | 6.65455200  | -6.02001900 | 1.32016200  | N | -3.09998500 | 3.56348300  | 0.79360600  |
| C | 6.35653200  | -4.56741800 | 1.71958800  | C | -3.41914700 | -3.16555400 | -4.70918800 |
| C | 4.88560500  | -4.24933800 | 1.57956600  | C | -4.60270300 | -3.02579500 | -3.75393400 |
| C | 4.02912600  | -4.27052600 | 2.68845300  | O | -5.73602500 | -3.38065200 | -4.05841100 |
| C | 4.33624200  | -4.00765800 | 0.31315100  | N | -4.29217900 | -2.48924300 | -2.52245100 |
| C | 2.65722300  | -4.06254400 | 2.53950700  | C | -5.08458600 | -2.86776200 | -1.35285600 |
| C | 2.96569800  | -3.80338400 | 0.15399700  | C | -5.51498500 | -1.65899300 | -0.50216200 |

|    |             |             |             |   |             |             |             |
|----|-------------|-------------|-------------|---|-------------|-------------|-------------|
| O  | -4.83982200 | -1.29054100 | 0.47270800  | H | -4.68489500 | 3.63257100  | 2.23861600  |
| C  | -4.30392100 | -3.86185500 | -0.47880300 | H | -2.95644100 | -4.13871100 | -4.50927700 |
| O  | -3.98172600 | -4.96889300 | -1.29536300 | H | -4.93989200 | -4.14930300 | 0.37481400  |
| N  | -6.68184000 | -1.02651200 | -0.79607400 | H | -3.41462200 | -3.36664600 | -0.06762900 |
| C  | -7.65662700 | -1.29821000 | -1.87905300 | H | -3.32379400 | -5.52440300 | -0.83200800 |
| C  | -7.39130300 | -0.43690000 | -3.11971800 | H | -5.96206500 | -3.38285200 | -1.74831600 |
| C  | -8.98705500 | -0.95547300 | -1.18504100 | H | -3.29727500 | -2.33362800 | -2.36175300 |
| C  | -8.63245900 | 0.26383400  | -0.31368200 | H | -9.30091200 | -1.79438200 | -0.55439000 |
| C  | -7.18429800 | -0.00718900 | 0.14044900  | H | -9.78996100 | -0.75285100 | -1.89862500 |
| C  | 0.09008300  | 2.72918800  | -4.55321600 | H | -9.31024500 | 0.38841900  | 0.53496000  |
| C  | 4.70283400  | 0.08484900  | -5.69829200 | H | -8.68403500 | 1.18236100  | -0.90693100 |
| C  | 3.94089100  | -0.41901800 | -4.47654200 | H | -7.12977600 | -0.40959000 | 1.15806700  |
| S  | 4.64489600  | -2.02453100 | -3.88220500 | H | -6.55543100 | 0.89047400  | 0.12233500  |
| C  | 0.30771400  | -5.11333500 | -2.78077900 | H | -7.60608500 | -2.34731400 | -2.17294800 |
| C  | 0.75600300  | -3.83632000 | -3.47873900 | H | -0.16804600 | 1.67464400  | -4.70151000 |
| O  | 1.49071000  | -3.01527200 | -2.90075400 | H | -0.64903700 | 3.32043100  | -5.09836800 |
| C  | -0.57973100 | -4.81370000 | -1.55454200 | H | 2.88887300  | -0.58419000 | -4.71701900 |
| C  | -0.72626300 | -5.97240000 | -0.57740900 | H | 3.98287100  | 0.30883000  | -3.66177000 |
| O  | -1.82671000 | -6.37424500 | -0.18849700 | H | 3.49178100  | -2.51096800 | -3.37073300 |
| N  | 0.42397800  | -6.54899100 | -0.13355000 | H | 5.76727900  | 0.22036200  | -5.47917700 |
| N  | 0.35384800  | -3.66144800 | -4.75160200 | H | -0.16918700 | -3.96290500 | -1.00116800 |
| C  | 0.63066000  | -2.44082500 | -5.50038300 | H | -1.58419500 | -4.52908600 | -1.86760000 |
| Zn | -1.68212900 | 2.45858800  | 1.74869800  | H | 0.32582900  | -7.22041900 | 0.61515500  |
| Zn | 1.23247300  | 3.45641000  | -0.36885200 | H | 1.30522900  | -6.05821800 | -0.19344000 |
| H  | 1.16389300  | 9.27533700  | -2.54465500 | H | -0.21671700 | -5.78542500 | -3.46817000 |
| H  | 2.87237900  | 8.93792100  | -2.23661300 | H | 0.22970900  | -1.57267300 | -4.96995200 |
| H  | 1.45110400  | 5.48522700  | -2.62210700 | H | 1.70717500  | -2.31661900 | -5.64099700 |
| H  | 0.89373200  | 6.29274300  | 1.45821300  | H | -0.31515100 | -4.31344800 | -5.13182100 |
| H  | 6.46286600  | 0.63022300  | -2.01224800 | H | 0.35967600  | 4.55900900  | 5.55112500  |
| H  | 6.05284300  | 1.92714100  | -3.13757300 | H | -0.73247100 | 5.50556300  | 4.52358700  |
| H  | 3.40999400  | 2.69000300  | -2.52338600 | H | -3.19445100 | 3.16698000  | 6.01159600  |
| H  | 3.72854300  | 2.68489200  | 1.65209700  | H | -1.67310700 | 3.03984200  | 5.09913500  |
| H  | 8.33675600  | -1.75773400 | 0.52489500  | H | -4.72370100 | 0.83890700  | 5.70653800  |
| H  | 8.33458600  | -0.44718500 | -0.64339000 | H | -3.46880200 | -0.19433500 | 1.80955500  |
| H  | 9.85831800  | -0.38642600 | 2.02661000  | H | -4.90483700 | -0.82894800 | 3.75156200  |
| H  | 9.80307800  | 0.92546400  | 0.85490400  | H | 0.15435400  | -2.51723500 | -6.47851000 |
| H  | 6.22976400  | -0.23625800 | 3.53963000  | H | 1.22621600  | -5.62652200 | -2.47755600 |
| H  | 7.76167100  | -1.12943300 | 3.51814500  | H | -7.43911200 | 0.63242900  | -2.88792500 |
| H  | 6.58925100  | -1.31998800 | 2.17871600  | H | -6.40592700 | -0.66224300 | -3.53190000 |
| H  | 10.84267900 | -0.70868200 | -0.92988400 | H | -8.13572200 | -0.65572400 | -3.89142300 |
| H  | 6.94718800  | -3.89357100 | 1.08523200  | H | 2.00877600  | 8.05170200  | -3.49603900 |
| H  | 6.68089000  | -4.39626000 | 2.75266700  | H | 7.19511800  | 2.23392700  | -1.82484800 |
| H  | 4.44284300  | -4.45844600 | 3.67669100  | H | 5.96779400  | 1.82422600  | 0.71081900  |
| H  | 4.98864300  | -3.97778700 | -0.55681200 | H | 1.37727000  | 8.50321300  | 0.29567300  |
| H  | 2.00304100  | -4.07696000 | 3.40619300  | H | -4.61769900 | 6.75767600  | -1.67033700 |
| H  | 2.55897400  | -3.60506000 | -0.83460200 | H | -5.83115700 | 5.13328200  | 0.53847000  |
| H  | 1.05847000  | -3.65650900 | 1.15658400  | H | 10.83333900 | -2.02457400 | 0.25195100  |
| H  | 6.09895700  | -6.71926100 | 1.95286000  | H | 9.98891400  | -2.21491700 | -1.28993800 |
| H  | -5.43702700 | 5.34532600  | -2.35595500 | H | 7.72099500  | -6.24893300 | 1.41756800  |
| H  | -3.71762300 | 5.60549200  | -2.66990000 | H | 6.36222900  | -6.20747500 | 0.28239400  |
| H  | -2.13861700 | 3.96437500  | -1.09671600 | H | -3.79318300 | -3.16439900 | -5.73444400 |

|   |             |             |             |   |             |             |             |
|---|-------------|-------------|-------------|---|-------------|-------------|-------------|
| H | -2.66675400 | -2.39343900 | -4.55444500 | C | -1.18760500 | -2.93378900 | 2.48582400  |
| H | 4.62360100  | -0.61933600 | -6.53080600 | O | -1.26916700 | -2.49259300 | 1.19685000  |
| H | 4.30317400  | 1.05145400  | -6.02507600 | H | -0.42259300 | -1.99903000 | 5.66312000  |
| H | -3.00361400 | 3.98859400  | 4.45415500  | H | -1.51062800 | -5.86899100 | 4.16021700  |
| H | 2.05426800  | 5.15159800  | 3.57394800  | H | -0.61870400 | -1.05686100 | 3.38224700  |
| H | 0.72536800  | 6.26080500  | 5.19563600  | H | -1.74154800 | -4.92551600 | 1.88806900  |
| H | 1.08882200  | 2.90506300  | -4.95690700 | H | -1.15297000 | -1.52251800 | 1.14289700  |
| C | 1.85478200  | -0.37444200 | 0.12827400  | C | 0.00399000  | 3.04332200  | -3.06534400 |
| H | 2.59853600  | -0.83389700 | -0.52773600 | O | 1.11241400  | 3.16476500  | -2.42000800 |
| H | 2.35072700  | 0.39801300  | 0.71774200  | O | -1.13150700 | 3.12225100  | -2.55671400 |
| H | 1.46606200  | -1.14046700 | 0.80045000  | N | -1.87172400 | 0.31957300  | -2.10092000 |
| C | -2.16448500 | -5.06315100 | 7.05937700  | C | -1.10853600 | -0.81584100 | -2.13054000 |
| C | -0.82015700 | -4.59702000 | 6.47930500  | O | -1.49206100 | -1.84562200 | -2.71374800 |
| H | -0.12907800 | -5.45008800 | 6.45771800  | N | 0.07412900  | -0.84468800 | -1.44689300 |
| H | -0.36972300 | -3.85691700 | 7.15107100  | C | 0.71524900  | 0.22316500  | -0.71070700 |
| H | -2.86813000 | -4.22766600 | 7.13692100  | C | -0.26113300 | 0.93168600  | 0.22558600  |
| H | -2.62721200 | -5.82601600 | 6.42556200  | O | -0.99439600 | 0.33771500  | 1.04289800  |
| H | -2.03565200 | -5.49211300 | 8.05859400  | H | 1.12073000  | 0.98871600  | -1.38257500 |
| C | -0.94254500 | -4.00671900 | 5.09033300  | H | -2.72641500 | 0.22982100  | -2.63107300 |
| C | -0.71032000 | -2.65042800 | 4.84068600  | H | 0.64128100  | -1.65101300 | -1.69936200 |
| C | -1.31677600 | -4.81070800 | 4.00135000  | O | -0.28854600 | 2.22274500  | 0.19146600  |
| C | -0.82457900 | -2.10893400 | 3.55673200  | H | -1.49227600 | 1.26477100  | -2.06744300 |
| C | -1.44593900 | -4.29229600 | 2.71827400  |   |             |             |             |

**(5S)-MeDHU-ES-II (*Sm*DHPase)**

|   |             |             |             |   |             |             |             |
|---|-------------|-------------|-------------|---|-------------|-------------|-------------|
| C | 1.32515300  | 8.66622900  | -2.41399200 | C | -0.16554200 | 5.40860300  | 4.83012000  |
| C | 1.13730500  | 7.56851200  | -1.42836300 | N | 0.66866100  | 5.05365700  | 3.69472300  |
| N | 0.99882400  | 7.76864100  | -0.06248600 | C | 0.35066900  | 4.01157500  | 2.84184300  |
| C | 1.07626700  | 6.21254200  | -1.58965900 | O | -0.82043000 | 3.51546900  | 2.97840400  |
| C | 0.87028100  | 6.56114800  | 0.54160000  | O | 1.22691100  | 3.67485200  | 1.99532400  |
| N | 0.91216700  | 5.59868000  | -0.36341800 | C | -1.92150300 | -5.07256400 | 7.10283900  |
| C | 6.12203600  | 2.20259800  | -1.95841100 | C | -0.74326800 | -5.41119700 | 6.17837700  |
| C | 4.94859100  | 2.47141800  | -1.08438400 | C | -0.90801700 | -4.68787100 | 4.86530800  |
| N | 4.96840200  | 2.31136100  | 0.29144000  | C | -1.43729100 | -5.32411700 | 3.73550200  |
| C | 3.67638100  | 2.88303600  | -1.37583100 | C | -0.68424200 | -3.30728100 | 4.80180500  |
| C | 3.74323200  | 2.62382300  | 0.77656700  | C | -1.76007400 | -4.61074500 | 2.58223600  |
| N | 2.93402500  | 2.96770600  | -0.21352800 | C | -1.00860700 | -2.57386900 | 3.66656300  |
| C | 10.25717500 | -0.73943500 | -0.31001800 | C | -1.55982400 | -3.22798900 | 2.55837400  |
| C | 10.20715600 | 0.77922600  | -0.11975100 | O | -1.91962600 | -2.54503000 | 1.43327000  |
| C | 9.75258300  | 1.26213800  | 1.26251200  | C | -3.08464100 | 2.94800900  | 5.01420400  |
| S | 7.99427500  | 0.94483600  | 1.72637200  | C | -3.54370200 | 1.74469300  | 4.25444500  |
| C | 8.06643500  | -0.69070300 | 2.53984700  | N | -3.10454300 | 1.42568500  | 2.97218800  |
| C | 6.97000300  | -5.49075400 | 1.44398600  | C | -4.43711600 | 0.78682300  | 4.65928000  |
| C | 6.06850900  | -4.34057400 | 1.91908400  | C | -3.73172900 | 0.31058500  | 2.61807700  |
| C | 4.60681900  | -4.60541900 | 1.63415900  | N | -4.54553600 | -0.10542100 | 3.61123400  |
| C | 3.73426400  | -5.03277900 | 2.64322200  | C | -4.89289300 | 5.46191300  | -1.93077300 |
| C | 4.10554700  | -4.46986000 | 0.33279700  | C | -4.44468300 | 4.72472600  | -0.72022300 |
| C | 2.39859200  | -5.32158900 | 2.36130700  | N | -5.14402700 | 4.69967700  | 0.47751900  |
| C | 2.77345400  | -4.76185400 | 0.04022500  | C | -3.33325800 | 3.95856700  | -0.49787100 |
| C | 1.91632000  | -5.19150100 | 1.05793700  | C | -4.45039500 | 3.93695600  | 1.35885300  |

|    |             |             |             |   |             |             |             |
|----|-------------|-------------|-------------|---|-------------|-------------|-------------|
| N  | -3.34838100 | 3.47315600  | 0.79608700  | H | 6.37773300  | -3.41279300 | 1.42046100  |
| C  | -3.18326800 | -3.29913000 | -4.72758700 | H | 6.21258200  | -4.18290400 | 2.99443700  |
| C  | -4.32443100 | -3.18034200 | -3.73428200 | H | 4.10528900  | -5.13692800 | 3.66016100  |
| O  | -5.48083300 | -3.44254600 | -4.05488400 | H | 4.76509200  | -4.12747600 | -0.46154900 |
| N  | -3.95570800 | -2.78498300 | -2.48069400 | H | 1.72837000  | -5.63296900 | 3.15681800  |
| C  | -4.93715300 | -2.61471100 | -1.42189900 | H | 2.41515200  | -4.61786500 | -0.97560300 |
| C  | -4.94186000 | -1.15406100 | -0.96775100 | H | 0.87279300  | -5.40933600 | 0.85252800  |
| O  | -3.91181700 | -0.65370600 | -0.46102100 | H | 6.70482100  | -6.42655800 | 1.94576500  |
| C  | -4.65715500 | -3.53924500 | -0.21111700 | H | -0.69669200 | -6.49391700 | 6.01576200  |
| O  | -4.81350600 | -4.89410500 | -0.54313800 | H | 0.19807600  | -5.12357700 | 6.66311600  |
| N  | -6.06720100 | -0.42325000 | -1.07660500 | H | -1.62641400 | -6.39454100 | 3.76640500  |
| C  | -7.37673000 | -0.83088900 | -1.65970400 | H | -0.27126200 | -2.79267300 | 5.66652900  |
| C  | -7.35167400 | -0.84646900 | -3.19173700 | H | -2.18758600 | -5.10285600 | 1.71353600  |
| C  | -8.32301300 | 0.23678200  | -1.07520200 | H | -0.84828800 | -1.49982700 | 3.63212700  |
| C  | -7.45412600 | 1.50326000  | -1.01721400 | H | -1.78514100 | -1.59131400 | 1.58221200  |
| C  | -6.07773100 | 0.97217300  | -0.59595700 | H | -2.87035200 | -5.36813600 | 6.64391100  |
| C  | 0.07859600  | 2.96491800  | -4.48116300 | H | -5.87896400 | 5.12972300  | -2.27589800 |
| C  | -0.10502400 | 2.92707600  | -2.96674900 | H | -4.18283200 | 5.28943500  | -2.74173100 |
| O  | 0.90746600  | 3.30596500  | -2.27266000 | H | -2.54965200 | 3.70317600  | -1.19647100 |
| O  | -1.20777800 | 2.55264700  | -2.50661300 | H | -4.77756400 | 3.73908300  | 2.36793500  |
| C  | 4.71672500  | 0.48953600  | -5.59136000 | H | -3.00545900 | -4.36413000 | -4.91706600 |
| C  | 3.92274200  | 0.14518900  | -4.33325900 | H | -5.39659800 | -3.29954600 | 0.56795900  |
| S  | 4.65129500  | -1.24658600 | -3.34620600 | H | -3.66790000 | -3.30863300 | 0.19650600  |
| C  | 0.28993000  | -5.38524000 | -3.27522900 | H | -3.96019500 | -5.24966700 | -0.84619000 |
| C  | 0.92411800  | -4.10570300 | -3.80582700 | H | -5.88971200 | -2.91546900 | -1.85462900 |
| O  | 1.83696300  | -3.53910200 | -3.18422900 | H | -3.00123000 | -2.46480700 | -2.32679300 |
| C  | -0.55484300 | -5.07504900 | -2.02044400 | H | -8.63325500 | -0.05225000 | -0.06446400 |
| C  | -1.17608400 | -6.27649600 | -1.32007300 | H | -9.22468400 | 0.35651300  | -1.68036300 |
| O  | -2.35053200 | -6.28371700 | -0.95623500 | H | -7.83799500 | 2.25249300  | -0.31936600 |
| N  | -0.36176500 | -7.34411800 | -1.09626000 | H | -7.39667100 | 1.97057700  | -2.00549600 |
| N  | 0.43781000  | -3.61933700 | -4.96578900 | H | -5.95469000 | 0.98116900  | 0.49410200  |
| C  | 0.82009600  | -2.30317400 | -5.45787600 | H | -5.23696300 | 1.52688400  | -1.01945800 |
| Zn | -1.76933600 | 2.38434500  | 1.66142100  | H | -7.64464900 | -1.82391700 | -1.28864400 |
| Zn | 0.96932200  | 3.55551700  | -0.15431200 | H | -0.73133000 | 2.43388600  | -4.98279300 |
| O  | -0.61551700 | 2.47875500  | 0.11084500  | H | 0.08222200  | 4.00625800  | -4.82279300 |
| H  | 0.48410400  | 9.36950600  | -2.41556800 | H | 2.88958100  | -0.11751300 | -4.57141000 |
| H  | 2.23780900  | 9.24152300  | -2.21936300 | H | 3.87984200  | 0.99912200  | -3.65345000 |
| H  | 1.14767900  | 5.62187200  | -2.48860100 | H | 3.75915700  | -2.20391400 | -3.67607300 |
| H  | 0.75495500  | 6.42243700  | 1.60731800  | H | 5.75105800  | 0.74924900  | -5.34762400 |
| H  | 6.40851900  | 1.14522700  | -1.93927300 | H | 0.06931100  | -4.54328300 | -1.29380400 |
| H  | 5.88324300  | 2.47047800  | -2.98973900 | H | -1.37488900 | -4.40365000 | -2.27193200 |
| H  | 3.22288700  | 3.11159300  | -2.32668400 | H | -0.73373100 | -8.09916900 | -0.53805100 |
| H  | 3.46796600  | 2.60652800  | 1.81926300  | H | 0.63900400  | -7.28158600 | -1.19890700 |
| H  | 9.56169100  | 1.22699200  | -0.88482400 | H | -0.32714400 | -5.87367500 | -4.03673300 |
| H  | 11.21040900 | 1.19625600  | -0.28332300 | H | 0.43589000  | -1.51628400 | -4.80151400 |
| H  | 10.37362800 | 0.83579200  | 2.05788400  | H | 1.90819400  | -2.23159900 | -5.51527000 |
| H  | 9.85507500  | 2.34942100  | 1.32873000  | H | -0.37968100 | -4.05681600 | -5.36335800 |
| H  | 7.06366700  | -0.89520200 | 2.92070300  | H | -0.13940500 | 4.66137000  | 5.63437700  |
| H  | 8.76243500  | -0.66393100 | 3.38151000  | H | -1.19890600 | 5.51731200  | 4.50022200  |
| H  | 8.35087400  | -1.48090100 | 1.84429300  | H | -3.53384000 | 2.95537000  | 6.01045600  |
| H  | 10.87497400 | -1.21840100 | 0.45791600  | H | -1.99775600 | 2.95982200  | 5.10804800  |

|   |             |             |             |   |             |             |             |
|---|-------------|-------------|-------------|---|-------------|-------------|-------------|
| H | -4.98136200 | 0.66473400  | 5.58200800  | H | 4.26193900  | 1.34575400  | -6.10352200 |
| H | -3.64652500 | -0.19105800 | 1.66420900  | H | -3.36430400 | 3.87779000  | 4.50707600  |
| H | -5.09169200 | -0.95400100 | 3.59856900  | H | 1.66009800  | 5.23486200  | 3.76115700  |
| H | 0.40817400  | -2.16874500 | -6.45917900 | H | 0.17565100  | 6.36409300  | 5.23683500  |
| H | 1.11448600  | -6.06550200 | -3.03957700 | H | 1.04403300  | 2.53292300  | -4.75907500 |
| H | -7.04878700 | 0.12750300  | -3.59033100 | N | -1.02170300 | -0.55829300 | -0.69709200 |
| H | -6.67962400 | -1.61406400 | -3.57999100 | C | -0.39598400 | -1.23940300 | -1.75806000 |
| H | -8.35563300 | -1.06962100 | -3.56860500 | O | -1.07592900 | -1.92217800 | -2.53160400 |
| H | 1.40694400  | 8.24583700  | -3.41822200 | N | 0.93961800  | -1.10402200 | -1.81856300 |
| H | 6.99754100  | 2.78895800  | -1.65745100 | C | 1.65092100  | -0.13190900 | -0.99065000 |
| H | 5.76653000  | 1.98490600  | 0.82777500  | C | 1.11784600  | -0.15650700 | 0.44641600  |
| H | 0.99942100  | 8.66154500  | 0.40811400  | C | -0.39538700 | -0.13713000 | 0.43328200  |
| H | -4.94992300 | 6.54328100  | -1.75841000 | O | -1.07052400 | 0.14052500  | 1.44664800  |
| H | -6.01521700 | 5.17305700  | 0.66716400  | H | 2.71262400  | -0.38351600 | -1.02011900 |
| H | 9.25667100  | -1.18125600 | -0.26917700 | H | 1.41619700  | 0.76350400  | 0.95446600  |
| H | 10.68558900 | -0.99183100 | -1.28445700 | H | -2.04900600 | -0.62055300 | -0.68089400 |
| H | 8.02434300  | -5.28101100 | 1.65349300  | H | 1.43276500  | -1.77094400 | -2.40876000 |
| H | 6.86540400  | -5.65196300 | 0.36654000  | C | 1.62035500  | -1.36639200 | 1.25667400  |
| H | -1.83803600 | -5.58521900 | 8.06771100  | H | 2.71201200  | -1.33967100 | 1.31765700  |
| H | -1.96822600 | -3.99636400 | 7.29690200  | H | 1.21896800  | -1.35597300 | 2.27141100  |
| H | -3.50218100 | -2.85254400 | -5.67247000 | H | 1.34008700  | -2.31265300 | 0.78962000  |
| H | -2.26558600 | -2.82535400 | -4.37709900 | H | 1.52949400  | 0.86962300  | -1.41484400 |
| H | 4.74339200  | -0.35250500 | -6.28866700 | H | -0.99202900 | 2.38983500  | -0.79627400 |

#### (5S)-MeDHU-TS1-II (*SmDHPase*)

|   |             |             |             |   |             |             |             |
|---|-------------|-------------|-------------|---|-------------|-------------|-------------|
| C | 0.70009800  | 8.72432500  | -2.33689500 | C | -0.51003100 | 5.26996500  | 4.86827000  |
| C | 0.52009700  | 7.57990900  | -1.40315600 | N | 0.28614600  | 4.97728000  | 3.68280800  |
| N | 0.31339200  | 7.72391700  | -0.03917300 | C | -0.00749900 | 3.97679300  | 2.77579100  |
| C | 0.54338100  | 6.22859300  | -1.61020700 | O | -1.15733600 | 3.42984700  | 2.87091600  |
| C | 0.23122500  | 6.49314400  | 0.52087000  | O | 0.87821300  | 3.72691500  | 1.90187900  |
| N | 0.36602400  | 5.56319700  | -0.41089600 | C | -3.22613400 | 2.58532100  | 5.02651400  |
| C | 5.99152100  | 2.65281700  | -1.97107300 | C | -3.62518200 | 1.32398300  | 4.33557700  |
| C | 4.79716900  | 2.87243400  | -1.11193300 | N | -3.25934200 | 1.05699300  | 3.02429800  |
| N | 4.82008800  | 2.76432500  | 0.26850500  | C | -4.35076500 | 0.26317500  | 4.81237400  |
| C | 3.50137300  | 3.18199300  | -1.42628600 | C | -3.75592800 | -0.13505000 | 2.71682700  |
| C | 3.57426800  | 3.00275700  | 0.73489700  | N | -4.42409300 | -0.64500200 | 3.77312300  |
| N | 2.74718000  | 3.25306900  | -0.27053500 | C | -5.24543900 | 5.03516200  | -1.88310400 |
| C | 10.34965500 | 0.02489500  | -0.36707400 | C | -4.72666500 | 4.27974800  | -0.70994900 |
| C | 8.97755100  | 0.36465100  | 0.23154300  | N | -5.40854000 | 4.14691600  | 0.49066200  |
| C | 9.09192700  | 1.30831300  | 1.43090500  | C | -3.55925200 | 3.58840200  | -0.53076600 |
| S | 7.50710100  | 1.77671500  | 2.24841200  | C | -4.65464400 | 3.39809600  | 1.33098000  |
| C | 7.00518200  | 0.20206300  | 3.05658200  | N | -3.52517400 | 3.04401900  | 0.73993200  |
| C | 7.45101600  | -4.99162000 | 1.33279700  | C | -2.85999500 | -3.52892900 | -4.79289400 |
| C | 6.61063500  | -3.79798400 | 1.81072900  | C | -3.99197800 | -3.47465700 | -3.77640700 |
| C | 5.12974400  | -4.04046600 | 1.62531100  | O | -5.11763700 | -3.87779200 | -4.06093800 |
| C | 4.32304000  | -4.45672000 | 2.69237100  | N | -3.65390900 | -2.97481300 | -2.55088400 |
| C | 4.54548700  | -3.90754500 | 0.35876700  | C | -4.62046100 | -2.91929700 | -1.46497000 |
| C | 2.96936400  | -4.73463600 | 2.50109900  | C | -4.81169800 | -1.47544100 | -0.99142000 |
| C | 3.19376300  | -4.18686200 | 0.15758000  | O | -3.86231000 | -0.84957100 | -0.47249200 |
| C | 2.40164200  | -4.60229400 | 1.23249900  | C | -4.19742900 | -3.79011800 | -0.25536100 |

|    |             |             |             |   |             |             |             |
|----|-------------|-------------|-------------|---|-------------|-------------|-------------|
| O  | -4.25460200 | -5.16093600 | -0.55145500 | H | -2.77231300 | 3.41609300  | -1.25051100 |
| N  | -6.03038300 | -0.90487900 | -1.07544300 | H | -4.95569600 | 3.12671900  | 2.33056600  |
| C  | -7.26395800 | -1.46467000 | -1.68999500 | H | -2.56571200 | -4.57744000 | -4.91704100 |
| C  | -7.20410200 | -1.43092900 | -3.21900300 | H | -4.91211200 | -3.59419300 | 0.55891500  |
| C  | -8.35325100 | -0.55035500 | -1.09567200 | H | -3.21348000 | -3.46208800 | 0.09575200  |
| C  | -7.66253200 | 0.81796900  | -0.98441800 | H | -3.37825800 | -5.47105900 | -0.83939900 |
| C  | -6.23110700 | 0.46234900  | -0.56018700 | H | -5.53872100 | -3.34343100 | -1.86785800 |
| C  | -0.24522800 | 2.80874600  | -4.50326700 | H | -2.73956900 | -2.53873300 | -2.42093100 |
| C  | -0.35725600 | 2.87578000  | -2.99185800 | H | -8.63796100 | -0.90900400 | -0.09992600 |
| O  | 0.64380100  | 3.33973400  | -2.34067900 | H | -9.25345400 | -0.53266200 | -1.71464300 |
| O  | -1.41281600 | 2.43241800  | -2.47177200 | H | -8.15227500 | 1.48496300  | -0.26933600 |
| C  | 4.71529300  | 0.87972800  | -5.62281200 | H | -7.65830800 | 1.32168300  | -1.95647300 |
| C  | 4.06356100  | 0.11224900  | -4.47613700 | H | -6.11710700 | 0.45878500  | 0.53124800  |
| S  | 4.96438200  | -1.47651900 | -4.17175900 | H | -5.46870700 | 1.13458600  | -0.96166600 |
| C  | 0.71030500  | -5.17717100 | -3.13717400 | H | -7.40526000 | -2.49481200 | -1.35183400 |
| C  | 1.23463500  | -3.87488300 | -3.72401600 | H | -1.22561100 | 2.95020300  | -4.96154800 |
| O  | 2.06495800  | -3.18813500 | -3.10440200 | H | 0.46865200  | 3.53928300  | -4.88924600 |
| C  | -0.09123300 | -4.89626200 | -1.84789800 | H | 3.02393900  | -0.12084400 | -4.71570200 |
| C  | -0.53804200 | -6.14684000 | -1.10463800 | H | 4.06673500  | 0.70746100  | -3.55858400 |
| O  | -1.72079900 | -6.38744900 | -0.86912100 | H | 3.92264100  | -2.16601300 | -3.65620800 |
| N  | 0.44928200  | -7.00273400 | -0.71860300 | H | 5.76798500  | 1.09606200  | -5.41231000 |
| N  | 0.75465600  | -3.51176000 | -4.92825100 | H | 0.52107200  | -4.28333000 | -1.17883000 |
| C  | 1.05065900  | -2.21222500 | -5.51762200 | H | -0.98681900 | -4.31931300 | -2.07571400 |
| Zn | -1.96774800 | 2.06114700  | 1.68173900  | H | 0.17712800  | -7.78222500 | -0.13666700 |
| Zn | 0.73280000  | 3.54884300  | -0.21567500 | H | 1.41506400  | -6.71163700 | -0.68829400 |
| H  | -0.17016000 | 9.39079100  | -2.34718400 | H | 0.09040900  | -5.72256700 | -3.85643200 |
| H  | 1.57797900  | 9.32770400  | -2.07869400 | H | 0.61232900  | -1.40921200 | -4.91650900 |
| H  | 0.69057700  | 5.67743700  | -2.52450800 | H | 2.13147700  | -2.07365700 | -5.58582100 |
| H  | 0.09569100  | 6.31932600  | 1.57828300  | H | 0.00497400  | -4.05684500 | -5.32591600 |
| H  | 6.33923800  | 1.61428500  | -1.92901600 | H | -0.36279300 | 4.53859700  | 5.67352600  |
| H  | 5.74512200  | 2.87821600  | -3.01074300 | H | -1.56601000 | 5.27546900  | 4.59766200  |
| H  | 3.04279500  | 3.33532900  | -2.38993400 | H | -3.62252400 | 2.60344600  | 6.04509800  |
| H  | 3.29095800  | 2.98988900  | 1.77552200  | H | -2.13975800 | 2.68109200  | 5.06599100  |
| H  | 8.47231500  | -0.56078400 | 0.53390400  | H | -4.79966200 | 0.07715200  | 5.77489000  |
| H  | 8.34042300  | 0.82770700  | -0.53070800 | H | -3.65600300 | -0.63550000 | 1.76308100  |
| H  | 9.74559300  | 0.89098100  | 2.20381500  | H | -4.84738200 | -1.56072600 | 3.80555300  |
| H  | 9.52897700  | 2.26635900  | 1.13034300  | H | 0.62831200  | -2.18004400 | -6.52291000 |
| H  | 7.00501000  | 0.33326200  | 4.13969500  | H | 1.58240000  | -5.80309100 | -2.92242700 |
| H  | 7.71025000  | -0.58770700 | 2.79317100  | H | -7.00791300 | -0.41703000 | -3.58341500 |
| H  | 6.01010200  | -0.09526100 | 2.72227800  | H | -6.43921500 | -2.10498400 | -3.60874400 |
| H  | 10.86781400 | 0.92539300  | -0.71378300 | H | -8.16515200 | -1.75869300 | -3.63026300 |
| H  | 6.91080300  | -2.90124300 | 1.25248800  | H | 0.84241600  | 8.34996000  | -3.35247000 |
| H  | 6.82440200  | -3.59931200 | 2.86770400  | H | 6.82815200  | 3.29767100  | -1.67988400 |
| H  | 4.76064900  | -4.56192600 | 3.68245500  | H | 5.63609600  | 2.50907500  | 0.83005900  |
| H  | 5.15444400  | -3.57804500 | -0.48031200 | H | 0.24294100  | 8.59881200  | 0.45951400  |
| H  | 2.34978600  | -5.03936200 | 3.33910100  | H | -5.38163000 | 6.09996100  | -1.66034700 |
| H  | 2.77012300  | -4.04380200 | -0.83313900 | H | -6.31473600 | 4.53624700  | 0.70591000  |
| H  | 1.34228100  | -4.80051100 | 1.10248000  | H | 10.99471700 | -0.46756900 | 0.36838500  |
| H  | 7.19265300  | -5.89730900 | 1.89025000  | H | 10.24370900 | -0.64923500 | -1.22190800 |
| H  | -6.20757400 | 4.64338800  | -2.23253900 | H | 8.52147200  | -4.80402800 | 1.46829900  |
| H  | -4.53514000 | 4.95361600  | -2.70791900 | H | 7.27500400  | -5.19437200 | 0.27188500  |



|   |             |             |             |   |             |             |             |
|---|-------------|-------------|-------------|---|-------------|-------------|-------------|
| H | -3.24362100 | -3.18264800 | -5.75527800 | H | -1.11926100 | -6.31619900 | 3.62822800  |
| H | -1.99646300 | -2.93316300 | -4.49175200 | H | -0.65106600 | -1.38230500 | 3.73654600  |
| H | 4.67365300  | 0.30825400  | -6.55386900 | H | -1.78441500 | -4.96694700 | 1.65458400  |
| H | 4.20198400  | 1.83461100  | -5.78148400 | H | -1.45543300 | -1.43278000 | 1.58359600  |
| H | -3.59941800 | 3.46969500  | 4.49955800  | O | -0.65204000 | 2.09281400  | -0.03372700 |
| H | 1.26562600  | 5.22255300  | 3.70436000  | N | -1.01480700 | -0.33552300 | -0.77168200 |
| H | -0.23651900 | 6.25887400  | 5.24391000  | C | -0.36104600 | -0.99914500 | -1.79883600 |
| H | 0.10619600  | 1.80851400  | -4.78045800 | O | -0.97293400 | -1.78559500 | -2.53868400 |
| C | -1.47917000 | -5.41647900 | 6.96315300  | N | 0.96416300  | -0.75645100 | -1.92782400 |
| C | -0.23590100 | -5.42546400 | 6.06266700  | C | 1.66589700  | 0.20756800  | -1.08803700 |
| H | 0.02695700  | -6.45892200 | 5.80830300  | C | 1.11266500  | 0.19383200  | 0.34189700  |
| H | 0.61758000  | -5.00975500 | 6.61217500  | C | -0.40876000 | 0.32377800  | 0.30404000  |
| H | -1.74469200 | -4.39327300 | 7.24846800  | O | -1.07165500 | 0.26572800  | 1.42805700  |
| H | -2.33921600 | -5.84844600 | 6.44151300  | H | 2.72680100  | -0.05469600 | -1.08497000 |
| H | -1.31647200 | -5.99178300 | 7.88135300  | H | 1.48767200  | 1.06426700  | 0.88320000  |
| C | -0.49280600 | -4.62670800 | 4.80835200  | H | -2.01593600 | -0.54401900 | -0.69282200 |
| C | -0.36599900 | -3.23278300 | 4.81435700  | H | 1.47384500  | -1.45368000 | -2.46563800 |
| C | -1.00116100 | -5.23525900 | 3.65266900  | C | 1.51983400  | -1.07203000 | 1.10932700  |
| C | -0.74453400 | -2.46439700 | 3.71685400  | H | 2.60951300  | -1.16601900 | 1.12468400  |
| C | -1.37977400 | -4.48736900 | 2.54082000  | H | 1.16394000  | -1.03707200 | 2.13942300  |
| C | -1.25551900 | -3.09246100 | 2.57292100  | H | 1.11934600  | -1.97519500 | 0.64594400  |
| O | -1.64686000 | -2.39307100 | 1.47583700  | H | 1.57290900  | 1.20637600  | -1.52122400 |
| H | 0.02205900  | -2.73640800 | 5.70130600  | H | -1.06516900 | 2.14182900  | -0.95487400 |

**(5S)-MeDHU-INT1-II (*Sm*DHPase)**

|   |             |             |             |   |             |             |             |
|---|-------------|-------------|-------------|---|-------------|-------------|-------------|
| C | 0.64303100  | 8.64075800  | -2.57891700 | N | 0.18336900  | 5.04370600  | 3.52452500  |
| C | 0.44615700  | 7.52000600  | -1.62084300 | C | -0.13498700 | 4.04143900  | 2.62768200  |
| N | 0.20427100  | 7.69612000  | -0.26659800 | O | -1.30023900 | 3.53008300  | 2.71161000  |
| C | 0.48600900  | 6.16456200  | -1.79314700 | O | 0.75406000  | 3.75885500  | 1.76410200  |
| C | 0.12075100  | 6.47955000  | 0.32258200  | C | -3.29113400 | 2.68122900  | 4.92633400  |
| N | 0.28572600  | 5.52719600  | -0.58196800 | C | -3.67595900 | 1.36743600  | 4.33564300  |
| C | 5.97887400  | 2.62478500  | -2.00184800 | N | -3.36005400 | 1.05572400  | 3.02311700  |
| C | 4.78398500  | 2.87878000  | -1.15502800 | C | -4.32394200 | 0.29734000  | 4.89428000  |
| N | 4.79912700  | 2.82193800  | 0.22836800  | C | -3.80488200 | -0.17386400 | 2.79111800  |
| C | 3.49064200  | 3.17457900  | -1.48900800 | N | -4.39774200 | -0.66154900 | 3.90024600  |
| C | 3.55087100  | 3.07457600  | 0.67823100  | C | -5.27673500 | 4.91822300  | -2.06475900 |
| N | 2.72981000  | 3.28635900  | -0.34133100 | C | -4.77531200 | 4.17946200  | -0.87192400 |
| C | 10.34507300 | 0.07844000  | -0.29171300 | N | -5.49330100 | 4.04196200  | 0.30676500  |
| C | 8.98723100  | 0.40076700  | 0.34783100  | C | -3.60035900 | 3.51299700  | -0.64778500 |
| C | 9.10067500  | 1.50866500  | 1.39792200  | C | -4.75356100 | 3.31722700  | 1.17870900  |
| S | 7.53652400  | 2.01179500  | 2.23033200  | N | -3.59727400 | 2.98163600  | 0.62914100  |
| C | 7.11511500  | 0.50209400  | 3.17302000  | C | -2.80217200 | -3.70532600 | -4.71274200 |
| C | 7.47289900  | -4.91110600 | 1.52821500  | C | -3.94794500 | -3.57743000 | -3.71961300 |
| C | 6.64179200  | -3.66109100 | 1.85949900  | O | -5.05834600 | -4.04379100 | -3.96851200 |
| C | 5.15890000  | -3.90142800 | 1.68151700  | N | -3.63857000 | -2.92401200 | -2.56504600 |
| C | 4.34635500  | -4.24847700 | 2.76843500  | C | -4.52972300 | -2.96660000 | -1.41843800 |
| C | 4.57830800  | -3.84140300 | 0.40746700  | C | -4.81729100 | -1.54526300 | -0.92251500 |
| C | 2.99285800  | -4.53717600 | 2.58803200  | O | -3.92024800 | -0.87689700 | -0.36847000 |
| C | 3.22727100  | -4.13263200 | 0.21834600  | C | -3.92322200 | -3.80665100 | -0.27675900 |
| C | 2.43166900  | -4.48623400 | 1.31122400  | O | -3.77060700 | -5.12872300 | -0.73702700 |
| C | -0.59500300 | 5.38207400  | 4.71215400  | N | -6.05657600 | -1.02736300 | -1.06230400 |

|    |             |             |             |   |             |             |             |
|----|-------------|-------------|-------------|---|-------------|-------------|-------------|
| C  | -7.25088700 | -1.64159000 | -1.70197100 | H | -2.50158300 | -4.75891700 | -4.74177000 |
| C  | -7.17446100 | -1.59862700 | -3.23122000 | H | -4.61270500 | -3.75983500 | 0.58659200  |
| C  | -8.39206500 | -0.78454200 | -1.11924800 | H | -2.97881000 | -3.35459900 | 0.04284000  |
| C  | -7.77128100 | 0.61611300  | -0.99747200 | H | -2.93096600 | -5.48913000 | -0.40002200 |
| C  | -6.32928400 | 0.33025100  | -0.55630400 | H | -5.43405000 | -3.46666200 | -1.76459200 |
| C  | -0.23938500 | 2.65882800  | -4.58360800 | H | -2.69267100 | -2.55853900 | -2.42607600 |
| C  | -0.35176900 | 2.77701500  | -3.08089000 | H | -8.66969200 | -1.15888100 | -0.12726700 |
| O  | 0.63401400  | 3.27200300  | -2.43589600 | H | -9.28481000 | -0.81000400 | -1.74874000 |
| O  | -1.40570800 | 2.33232500  | -2.54905400 | H | -8.30236500 | 1.25656600  | -0.28747700 |
| C  | 4.74448700  | 0.73885300  | -5.61119100 | H | -7.78091900 | 1.12137200  | -1.96874000 |
| C  | 4.09448700  | -0.03212000 | -4.46556000 | H | -6.22583700 | 0.33686600  | 0.53623800  |
| S  | 4.96580300  | -1.64382600 | -4.20498500 | H | -5.59527600 | 1.03707000  | -0.95238400 |
| C  | 0.79766300  | -5.35570700 | -3.06318200 | H | -7.34699300 | -2.67960300 | -1.37237000 |
| C  | 1.28124000  | -4.02903100 | -3.63902100 | H | -1.21646600 | 2.80337200  | -5.04812400 |
| O  | 2.09634200  | -3.33100600 | -3.01580400 | H | 0.48906500  | 3.36116200  | -4.99331700 |
| C  | -0.09583700 | -5.14313900 | -1.82739900 | H | 3.04572800  | -0.23810600 | -4.69007500 |
| C  | -0.43631600 | -6.36246700 | -0.98054700 | H | 4.12740900  | 0.54751100  | -3.53857300 |
| O  | -1.28446700 | -6.28862500 | -0.08717800 | H | 3.93439300  | -2.30249400 | -3.63089000 |
| N  | 0.22670900  | -7.52048000 | -1.21325800 | H | 5.80475500  | 0.92949700  | -5.41460800 |
| N  | 0.80563900  | -3.67583700 | -4.84869500 | H | 0.37992200  | -4.42298600 | -1.15435900 |
| C  | 1.10347600  | -2.37825400 | -5.44551900 | H | -1.05028600 | -4.68869900 | -2.10535300 |
| Zn | -2.11470700 | 2.03365500  | 1.68169600  | H | 0.01279400  | -8.30886700 | -0.62039500 |
| Zn | 0.72013300  | 3.53517000  | -0.32119700 | H | 0.95667900  | -7.61338100 | -1.89889500 |
| H  | -0.23024000 | 9.30145200  | -2.62799900 | H | 0.27843900  | -5.95346200 | -3.82046100 |
| H  | 1.51088800  | 9.25574000  | -2.31442700 | H | 0.70191700  | -1.57098500 | -4.82518000 |
| H  | 0.66082800  | 5.59413000  | -2.69031900 | H | 2.18358700  | -2.25663400 | -5.55286300 |
| H  | -0.03538900 | 6.33264100  | 1.38105800  | H | 0.06641600  | -4.23029500 | -5.25280400 |
| H  | 6.33451900  | 1.59255000  | -1.90606900 | H | -0.43194000 | 4.68251800  | 5.54200000  |
| H  | 5.73035800  | 2.79386200  | -3.05160100 | H | -1.65482400 | 5.37484300  | 4.45704700  |
| H  | 3.03940600  | 3.28902100  | -2.46130000 | H | -3.64443200 | 2.75636700  | 5.95826600  |
| H  | 3.26041500  | 3.08966300  | 1.71684100  | H | -2.20796900 | 2.81207700  | 4.91381600  |
| H  | 8.57875600  | -0.50659000 | 0.80780200  | H | -4.71937400 | 0.13431300  | 5.88392000  |
| H  | 8.27225900  | 0.70647800  | -0.42505200 | H | -3.70650200 | -0.71532600 | 1.85933400  |
| H  | 9.81064600  | 1.23202200  | 2.18502400  | H | -4.76078600 | -1.59827300 | 3.99821300  |
| H  | 9.47276900  | 2.43395500  | 0.94536500  | H | 0.64363800  | -2.33647800 | -6.43379500 |
| H  | 6.23981800  | 0.74232100  | 3.77984200  | H | 1.71416900  | -5.88835800 | -2.78361500 |
| H  | 7.93879000  | 0.23370500  | 3.83864400  | H | -7.00815100 | -0.57748900 | -3.59008400 |
| H  | 6.87371700  | -0.33692300 | 2.51852000  | H | -6.38221300 | -2.24699400 | -3.60979100 |
| H  | 10.76889600 | 0.95612300  | -0.79156700 | H | -8.11874000 | -1.95838300 | -3.65432400 |
| H  | 6.96389700  | -2.83580500 | 1.21009900  | H | 0.81282800  | 8.24130000  | -3.58058600 |
| H  | 6.84677400  | -3.35138100 | 2.89152600  | H | 6.81149700  | 3.28929700  | -1.74534800 |
| H  | 4.77937600  | -4.29347900 | 3.76537400  | H | 5.61227300  | 2.58861200  | 0.80420900  |
| H  | 5.19179400  | -3.56450400 | -0.44756100 | H | 0.11321200  | 8.58252300  | 0.20801100  |
| H  | 2.36992600  | -4.79026300 | 3.44076000  | H | -5.44143700 | 5.98067700  | -1.85072000 |
| H  | 2.80419800  | -4.05809700 | -0.77945200 | H | -6.41560100 | 4.41081100  | 0.48681100  |
| H  | 1.37591300  | -4.70551900 | 1.18322500  | H | 11.06830400 | -0.25929900 | 0.45813900  |
| H  | 7.19249500  | -5.74646100 | 2.17731900  | H | 10.24437900 | -0.71467600 | -1.03818900 |
| H  | -6.21996200 | 4.50338500  | -2.43787100 | H | 8.54412800  | -4.72366200 | 1.65895900  |
| H  | -4.54253600 | 4.84793600  | -2.86942300 | H | 7.30737500  | -5.22610600 | 0.49329400  |
| H  | -2.78889100 | 3.34677100  | -1.34029300 | H | -3.16761800 | -3.44388300 | -5.70885400 |
| H  | -5.08271200 | 3.04669400  | 2.16959300  | H | -1.94566600 | -3.08321000 | -4.44555900 |

|   |             |             |             |   |             |             |             |
|---|-------------|-------------|-------------|---|-------------|-------------|-------------|
| H | 4.67551700  | 0.18259700  | -6.54986700 | H | -0.86454100 | -1.01379200 | 3.91017400  |
| H | 4.24918900  | 1.70659300  | -5.74828600 | H | -1.39213000 | -4.75491700 | 1.86327600  |
| H | -3.71597600 | 3.51741900  | 4.36112400  | H | -1.40290700 | -1.22100600 | 1.64115200  |
| H | 1.16745900  | 5.27070500  | 3.53328300  | O | -0.62046000 | 1.96967900  | -0.20707200 |
| H | -0.31795000 | 6.38545400  | 5.04412300  | N | -1.01304700 | -0.30999400 | -0.80844800 |
| H | 0.08948700  | 1.64170200  | -4.82378200 | C | -0.34260200 | -1.09420500 | -1.71457200 |
| C | -1.49641900 | -5.24825300 | 7.10202000  | O | -0.92312500 | -1.97296700 | -2.38076500 |
| C | -0.17410300 | -4.93821300 | 6.38640300  | N | 0.98856500  | -0.85947900 | -1.86351100 |
| H | 0.35844300  | -5.87504700 | 6.18228800  | C | 1.69635900  | 0.14785100  | -1.08511300 |
| H | 0.47214300  | -4.34738800 | 7.04667000  | C | 1.10138700  | 0.27095200  | 0.32377600  |
| H | -2.03420200 | -4.32432800 | 7.33962600  | C | -0.41652000 | 0.52615300  | 0.21364100  |
| H | -2.14877400 | -5.85636400 | 6.46724300  | O | -1.09226100 | 0.41915000  | 1.37981600  |
| H | -1.33141000 | -5.79384700 | 8.03792800  | H | 2.74793200  | -0.14535900 | -1.02308100 |
| C | -0.43141400 | -4.19099000 | 5.10073600  | H | 1.51946700  | 1.15755100  | 0.80703600  |
| C | -0.46502700 | -2.79319500 | 5.06970500  | H | -1.99720000 | -0.55191400 | -0.67520300 |
| C | -0.77184000 | -4.88174000 | 3.92848900  | H | 1.49500600  | -1.60461900 | -2.33375000 |
| C | -0.84313400 | -2.09981800 | 3.92051800  | C | 1.42969900  | -0.94631300 | 1.19271100  |
| C | -1.14615300 | -4.21050800 | 2.76942200  | H | 2.51259000  | -1.09817700 | 1.22952200  |
| C | -1.19317700 | -2.80956600 | 2.76335800  | H | 1.06825000  | -0.80618400 | 2.21183100  |
| O | -1.58969200 | -2.19539000 | 1.62018100  | H | 0.98259700  | -1.86217100 | 0.80329300  |
| H | -0.20200300 | -2.23353000 | 5.96506700  | H | 1.65455300  | 1.11162900  | -1.60176700 |
| H | -0.75134000 | -5.96940000 | 3.92517100  | H | -1.03595000 | 2.01281400  | -1.15457600 |

#### (5S)-MeDHU-TS2-II (*SmDHPase*)

|   |             |             |             |   |             |             |             |
|---|-------------|-------------|-------------|---|-------------|-------------|-------------|
| C | 0.99654800  | 8.66223600  | -2.40178300 | C | 0.20165300  | 4.01724200  | 2.75095600  |
| C | 0.77676300  | 7.49296800  | -1.49602500 | O | -0.94750200 | 3.47991700  | 2.86963200  |
| N | 0.60805100  | 7.62923500  | -0.12613100 | O | 1.08319400  | 3.77485800  | 1.86996100  |
| C | 0.72155700  | 6.14004500  | -1.71300600 | C | -3.08827100 | 2.70908900  | 5.02766100  |
| C | 0.47449900  | 6.39991700  | 0.42489700  | C | -3.53348800 | 1.44723700  | 4.37022300  |
| N | 0.53666300  | 5.46886400  | -0.51461400 | N | -3.20279300 | 1.17037700  | 3.05419700  |
| C | 6.06408600  | 2.40191100  | -2.04877600 | C | -4.25837200 | 0.39739300  | 4.87099200  |
| C | 4.88263000  | 2.69450700  | -1.19378900 | C | -3.71504800 | -0.01871400 | 2.76345300  |
| N | 4.91529200  | 2.62468400  | 0.18777400  | N | -4.36510800 | -0.51502900 | 3.83741400  |
| C | 3.59178700  | 3.03163900  | -1.50445200 | C | -5.07645200 | 5.19684500  | -1.87743300 |
| C | 3.68128300  | 2.90929900  | 0.65831100  | C | -4.53194500 | 4.44373300  | -0.70767700 |
| N | 2.85010700  | 3.15316800  | -0.34555300 | N | -5.17086900 | 4.41570700  | 0.52341400  |
| C | 10.33647900 | -0.37660700 | -0.46808700 | C | -3.40823600 | 3.67378400  | -0.53473900 |
| C | 9.00823400  | 0.02377200  | 0.18976600  | C | -4.43969800 | 3.65445700  | 1.37185800  |
| C | 9.20261700  | 1.10924000  | 1.25162100  | N | -3.36302800 | 3.19082400  | 0.76146000  |
| S | 7.68374400  | 1.69321000  | 2.11481500  | C | -3.03313900 | -3.46380300 | -4.76168200 |
| C | 7.20072000  | 0.20450500  | 3.06130400  | C | -4.15290900 | -3.36385500 | -3.73333600 |
| C | 7.27027200  | -5.27435900 | 1.28332100  | O | -5.29347900 | -3.72997000 | -4.00768800 |
| C | 6.47721400  | -4.05581800 | 1.77963300  | N | -3.78795600 | -2.86570300 | -2.51612200 |
| C | 4.98657500  | -4.23897100 | 1.60298500  | C | -4.73998000 | -2.75171300 | -1.42129800 |
| C | 4.16685300  | -4.60989600 | 2.67669800  | C | -4.85734100 | -1.29005100 | -0.97628400 |
| C | 4.40260700  | -4.08988800 | 0.33814200  | O | -3.87034000 | -0.69485700 | -0.49791300 |
| C | 2.80058200  | -4.82564100 | 2.49388700  | C | -4.33351300 | -3.61554900 | -0.20148200 |
| C | 3.03845700  | -4.30733000 | 0.14538400  | O | -4.44566800 | -4.98972500 | -0.46793800 |
| C | 2.23293900  | -4.67615800 | 1.22724600  | N | -6.05457500 | -0.67085100 | -1.04939800 |
| C | -0.27675600 | 5.29106600  | 4.83183900  | C | -7.32020100 | -1.19109800 | -1.63132900 |
| N | 0.51298800  | 5.02285000  | 3.64525200  | C | -7.28321400 | -1.19937200 | -3.16193100 |

|    |             |             |             |   |             |             |             |
|----|-------------|-------------|-------------|---|-------------|-------------|-------------|
| C  | -8.35971900 | -0.21526500 | -1.04538900 | H | -2.85866800 | -2.46561200 | -2.38808800 |
| C  | -7.60805400 | 1.12338900  | -0.97586100 | H | -8.64578800 | -0.53739900 | -0.03764600 |
| C  | -6.18764300 | 0.71428100  | -0.56207500 | H | -9.26711200 | -0.17227200 | -1.65261900 |
| C  | -0.18461100 | 2.77466500  | -4.52833900 | H | -8.05782900 | 1.82830100  | -0.27102600 |
| C  | 4.69162300  | 0.65868500  | -5.67993000 | H | -7.59515400 | 1.60297600  | -1.96012900 |
| C  | 3.92587600  | 0.06991000  | -4.49953100 | H | -6.05746000 | 0.73096600  | 0.52746400  |
| S  | 4.78796600  | -1.42475400 | -3.82107900 | H | -5.40304400 | 1.34422900  | -0.98856500 |
| C  | 0.45956300  | -5.23844100 | -3.13251300 | H | -7.50200000 | -2.20505700 | -1.26454000 |
| C  | 1.03901300  | -3.96396400 | -3.72710300 | H | 0.03213500  | 1.77765900  | -4.92755000 |
| O  | 1.91477500  | -3.32152900 | -3.12278200 | H | -1.13053600 | 3.09091900  | -4.97499300 |
| C  | -0.28995400 | -4.92428100 | -1.81911500 | H | 2.92186600  | -0.23050100 | -4.80526500 |
| C  | -0.79757000 | -6.15971800 | -1.08974500 | H | 3.81879100  | 0.80512100  | -3.69737700 |
| O  | -1.99395700 | -6.36660000 | -0.89776300 | H | 3.68106800  | -2.15871400 | -3.57321600 |
| N  | 0.15366100  | -7.04364200 | -0.67485700 | H | 5.71413100  | 0.93070500  | -5.39799800 |
| N  | 0.55839300  | -3.57294000 | -4.92364500 | H | 0.37557400  | -4.36131000 | -1.15776100 |
| C  | 0.91681000  | -2.29566100 | -5.52686500 | H | -1.15241200 | -4.29002000 | -2.01776300 |
| Zn | -1.86635500 | 2.10561800  | 1.73644000  | H | -0.15941400 | -7.81336600 | -0.10028900 |
| Zn | 0.83085600  | 3.42742000  | -0.18242100 | H | 1.12235400  | -6.77008500 | -0.59871900 |
| H  | 0.16094000  | 9.37032200  | -2.36602200 | H | -0.20896000 | -5.74376400 | -3.83736000 |
| H  | 1.91052300  | 9.20801700  | -2.14196000 | H | 0.54755700  | -1.46271600 | -4.91992200 |
| H  | 0.81482700  | 5.59637400  | -2.63916800 | H | 2.00212000  | -2.22041700 | -5.62347700 |
| H  | 0.35946600  | 6.22986500  | 1.48498900  | H | -0.21514400 | -4.08668900 | -5.31737000 |
| H  | 6.34968000  | 1.34521900  | -1.99421200 | H | -0.15878000 | 4.52511200  | 5.60983600  |
| H  | 5.83338200  | 2.62929300  | -3.09177400 | H | -1.33141100 | 5.34060300  | 4.56002400  |
| H  | 3.13570100  | 3.17634600  | -2.47064900 | H | -3.40857300 | 2.73249700  | 6.07269000  |
| H  | 3.40702800  | 2.93198200  | 1.70111700  | H | -2.00239900 | 2.80569100  | 4.98531600  |
| H  | 8.54732300  | -0.86137600 | 0.64356600  | H | -4.68630800 | 0.21977300  | 5.84453500  |
| H  | 8.30641000  | 0.38360700  | -0.57158100 | H | -3.62218600 | -0.53211500 | 1.81628800  |
| H  | 9.90665600  | 0.78072500  | 2.02401800  | H | -4.78741300 | -1.43037200 | 3.88755600  |
| H  | 9.62222900  | 2.01670900  | 0.80464400  | H | 0.47057700  | -2.24060300 | -6.52060500 |
| H  | 6.35574700  | 0.49062300  | 3.69086400  | H | 1.30106600  | -5.91281800 | -2.94360200 |
| H  | 8.02373100  | -0.11441900 | 3.70514600  | H | -7.05127300 | -0.20373700 | -3.55501400 |
| H  | 6.89570100  | -0.61595800 | 2.40958600  | H | -6.55305400 | -1.91384100 | -3.54612700 |
| H  | 10.81163600 | 0.47900300  | -0.96004500 | H | -8.26334000 | -1.49668300 | -3.55079600 |
| H  | 6.80746600  | -3.16525400 | 1.22787700  | H | 1.09675400  | 8.31843600  | -3.43314200 |
| H  | 6.70609400  | -3.87549400 | 2.83652500  | H | 6.93435900  | 3.00207800  | -1.76165800 |
| H  | 4.60358800  | -4.72672700 | 3.66583900  | H | 5.73032900  | 2.36163600  | 0.74676700  |
| H  | 5.02216900  | -3.79484300 | -0.50595800 | H | 0.59816200  | 8.50055600  | 0.38359400  |
| H  | 2.17126000  | -5.09331400 | 3.33728700  | H | -5.12984400 | 6.27377000  | -1.68036000 |
| H  | 2.61819500  | -4.15643400 | -0.84550600 | H | -6.03796100 | 4.88005100  | 0.75055000  |
| H  | 1.16410400  | -4.82215500 | 1.10535700  | H | 11.04328200 | -0.77085500 | 0.26977000  |
| H  | 6.98209400  | -6.17571000 | 1.83316800  | H | 10.17789500 | -1.15070800 | -1.22445100 |
| H  | -6.08183200 | 4.85613900  | -2.14933000 | H | 8.34766000  | -5.12745400 | 1.41389800  |
| H  | -4.42997500 | 5.04708300  | -2.74425200 | H | 7.08058500  | -5.45964100 | 0.22153500  |
| H  | -2.65520900 | 3.39856900  | -1.25902400 | H | -3.39935800 | -3.06572100 | -5.71096600 |
| H  | -4.72280800 | 3.45252000  | 2.39296600  | H | -2.13018100 | -2.93333100 | -4.45316700 |
| H  | -2.80927100 | -4.52508300 | -4.91724100 | H | 4.75611100  | -0.05622900 | -6.50431700 |
| H  | -5.03024800 | -3.37970600 | 0.61719600  | H | 4.19341200  | 1.56433300  | -6.04441400 |
| H  | -3.33417400 | -3.31530000 | 0.13073000  | H | -3.50170600 | 3.59384500  | 4.53034300  |
| H  | -3.59645000 | -5.33430400 | -0.79487800 | H | 1.49677600  | 5.24963900  | 3.67084000  |
| H  | -5.68038600 | -3.14424600 | -1.80420600 | H | 0.02328300  | 6.25530300  | 5.24989200  |

|   |             |             |             |   |             |             |             |
|---|-------------|-------------|-------------|---|-------------|-------------|-------------|
| H | 0.61821300  | 3.45384900  | -4.81975900 | O | 0.60034500  | 3.10377200  | -2.30719600 |
| C | -1.61991500 | -5.34177300 | 6.99205000  | O | -1.40550000 | 2.08711000  | -2.65810300 |
| C | -0.41679700 | -5.35324200 | 6.03823100  | H | -1.23579800 | 1.13515300  | -1.76267600 |
| H | -0.18051400 | -6.38767600 | 5.76175800  | N | -1.02412500 | -0.00584400 | -0.94471100 |
| H | 0.46446400  | -4.96112900 | 6.56100300  | C | -0.39606100 | -0.99098800 | -1.76322400 |
| H | -1.85944000 | -4.31990700 | 7.30446500  | O | -1.05783100 | -1.82374100 | -2.39390000 |
| H | -2.50802400 | -5.75472600 | 6.50273800  | N | 0.94171700  | -0.89155100 | -1.84369600 |
| H | -1.42415700 | -5.93329500 | 7.89323400  | C | 1.71208500  | 0.06793500  | -1.05640600 |
| C | -0.68964700 | -4.53612000 | 4.79704200  | C | 1.16013000  | 0.17336100  | 0.37087900  |
| C | -0.52043300 | -3.14611500 | 4.80251700  | C | -0.31844800 | 0.64419700  | 0.34759800  |
| C | -1.21672700 | -5.12405600 | 3.63891300  | O | -1.05377300 | 0.27823300  | 1.41738700  |
| C | -0.85919300 | -2.36524800 | 3.70027600  | H | 1.69769300  | 1.04312000  | -1.54974100 |
| C | -1.55520200 | -4.36363300 | 2.52186800  | H | 2.74825000  | -0.27872200 | -1.04137700 |
| C | -1.37084900 | -2.97314700 | 2.54314300  | H | 1.69806000  | 0.97822600  | 0.87975500  |
| O | -1.70191600 | -2.26499200 | 1.43572400  | H | -1.97265800 | -0.33004700 | -0.70153200 |
| H | -0.12005700 | -2.66188100 | 5.69100800  | H | 1.40243700  | -1.65590900 | -2.33557500 |
| H | -1.37322200 | -6.20026400 | 3.61231800  | O | -0.46276000 | 2.01348300  | 0.17092500  |
| H | -0.72421100 | -1.28811700 | 3.71909800  | C | 1.39150200  | -1.11908500 | 1.15567200  |
| H | -1.97088600 | -4.83231300 | 1.63482200  | H | 2.45216700  | -1.38767500 | 1.13533200  |
| H | -1.42545100 | -1.30401800 | 1.50992400  | H | 1.08753500  | -0.99913900 | 2.19502400  |
| C | -0.32086000 | 2.66656100  | -3.03734300 | H | 0.83117000  | -1.96079600 | 0.74498800  |

**(5S)-MeDHU-EP-II (*SmDHPase*)**

|   |             |             |             |   |             |             |             |
|---|-------------|-------------|-------------|---|-------------|-------------|-------------|
| C | 1.52511000  | 8.60560000  | -2.38611000 | O | -0.73556600 | 3.58170200  | 2.88205500  |
| C | 1.19149100  | 7.51812100  | -1.43675000 | O | 1.29226700  | 3.74755100  | 1.85250900  |
| N | 0.98626500  | 7.69805300  | -0.07760400 | C | -2.88106800 | 2.91504600  | 5.06543600  |
| C | 1.06877200  | 6.17444200  | -1.63553200 | C | -3.34223700 | 1.65136800  | 4.41243000  |
| C | 0.76879100  | 6.48771900  | 0.49075500  | N | -3.03315800 | 1.35201000  | 3.09168500  |
| N | 0.81055200  | 5.54254600  | -0.43459100 | C | -4.08551000 | 0.62023800  | 4.92443500  |
| C | 6.21771300  | 2.05942300  | -2.03498900 | C | -3.57977400 | 0.17301400  | 2.81335000  |
| C | 5.06409200  | 2.43832400  | -1.17906800 | N | -4.22538000 | -0.29717600 | 3.89957700  |
| N | 5.09431400  | 2.39604500  | 0.20377800  | C | -4.73919700 | 5.50329900  | -1.83894200 |
| C | 3.79972700  | 2.85202400  | -1.49951700 | C | -4.29456100 | 4.67791400  | -0.67534100 |
| C | 3.88312900  | 2.77388800  | 0.66884100  | N | -5.04888400 | 4.50525600  | 0.47804000  |
| N | 3.07125300  | 3.05144200  | -0.34302700 | C | -3.15362600 | 3.94967200  | -0.46121500 |
| C | 10.32418700 | -0.96220200 | -0.46058400 | C | -4.36631900 | 3.70191600  | 1.32585600  |
| C | 9.02367200  | -0.46449100 | 0.18644800  | N | -3.20998800 | 3.34643600  | 0.78372700  |
| C | 9.28818300  | 0.59762400  | 1.25677400  | C | -3.21542800 | -3.26722100 | -4.71243000 |
| S | 7.80815400  | 1.27305300  | 2.12176900  | C | -4.37176000 | -3.12783700 | -3.72647000 |
| C | 7.23410800  | -0.18690800 | 3.06214300  | O | -5.52966400 | -3.36656200 | -4.06610400 |
| C | 6.98090100  | -5.66866100 | 1.30823700  | N | -4.01321700 | -2.73924800 | -2.46958000 |
| C | 6.20968400  | -4.43951900 | 1.81266300  | C | -4.97565300 | -2.63747000 | -1.38582600 |
| C | 4.71699800  | -4.58351500 | 1.61675600  | C | -5.05721100 | -1.19637300 | -0.86418200 |
| C | 3.87446600  | -4.93777000 | 2.67803600  | O | -4.05011200 | -0.65881400 | -0.35843300 |
| C | 4.15192600  | -4.40949500 | 0.34639700  | C | -4.59171100 | -3.55237600 | -0.19313200 |
| C | 2.50434800  | -5.11221600 | 2.47794500  | O | -4.70839700 | -4.91490100 | -0.50763700 |
| C | 2.78414100  | -4.58539900 | 0.13646200  | N | -6.23706900 | -0.54091500 | -0.87929200 |
| C | 1.95560900  | -4.93741000 | 1.20651000  | C | -7.48194100 | -0.92257500 | -1.59298700 |
| C | 0.07648500  | 5.32732200  | 4.85721700  | C | -7.32088800 | -0.75465600 | -3.10551300 |
| N | 0.82828600  | 5.01921200  | 3.65208600  | C | -8.50962300 | 0.03800800  | -0.96559400 |
| C | 0.45241800  | 4.04710300  | 2.74662500  | C | -7.70544100 | 1.32525200  | -0.71945100 |

|    |             |             |             |   |             |             |             |
|----|-------------|-------------|-------------|---|-------------|-------------|-------------|
| C  | -6.31861300 | 0.81250900  | -0.30077700 | H | -9.37802700 | 0.18733500  | -1.61161900 |
| C  | -0.00526700 | 2.79381000  | -4.49844100 | H | -8.15676800 | 1.96758500  | 0.04208900  |
| C  | 4.73523300  | 0.39348300  | -5.65916800 | H | -7.63254300 | 1.90962500  | -1.64232700 |
| C  | 3.87014700  | -0.08841700 | -4.49905800 | H | -6.21704900 | 0.74577500  | 0.79010800  |
| S  | 4.63145400  | -1.55246100 | -3.65336200 | H | -5.49230500 | 1.43014200  | -0.66291200 |
| C  | 0.22101700  | -5.32595000 | -3.17145300 | H | -7.73724300 | -1.96010400 | -1.36184900 |
| C  | 0.83779500  | -4.04370800 | -3.71798800 | H | -0.96571300 | 2.97951700  | -4.98072500 |
| O  | 1.72063200  | -3.44211200 | -3.08511500 | H | 0.78038200  | 3.39521900  | -4.96223700 |
| C  | -0.55407300 | -5.04067300 | -1.86793600 | H | 2.88017600  | -0.38118200 | -4.85226800 |
| C  | -1.09694500 | -6.26656500 | -1.15141500 | H | 3.73214200  | 0.70622000  | -3.76095700 |
| O  | -2.28460800 | -6.37646500 | -0.84955400 | H | 3.49618000  | -2.26147400 | -3.46365300 |
| N  | -0.19691600 | -7.24491000 | -0.85000700 | H | 5.74425200  | 0.65629500  | -5.32449300 |
| N  | 0.38368200  | -3.60929900 | -4.91172700 | H | 0.09874900  | -4.49155100 | -1.18190600 |
| C  | 0.79408500  | -2.33409500 | -5.49041700 | H | -1.39996900 | -4.38833000 | -2.06863500 |
| Zn | -1.75998300 | 2.31634100  | 1.78848000  | H | -0.52420500 | -8.00672400 | -0.27318300 |
| Zn | 1.09928000  | 3.53367000  | -0.32736200 | H | 0.79584700  | -7.06689100 | -0.87089100 |
| H  | 0.75063400  | 9.38081500  | -2.42279300 | H | -0.43694900 | -5.80054500 | -3.90712100 |
| H  | 2.47153500  | 9.09659700  | -2.13086100 | H | 0.51948000  | -1.50152300 | -4.83679900 |
| H  | 1.17288800  | 5.60484300  | -2.54378400 | H | 1.87576600  | -2.32496300 | -5.64707000 |
| H  | 0.61187700  | 6.33968400  | 1.54863500  | H | -0.40284800 | -4.08761300 | -5.32365300 |
| H  | 6.42446500  | 0.98436400  | -1.98254600 | H | 0.16963300  | 4.55350400  | 5.63062500  |
| H  | 6.00005000  | 2.30326500  | -3.07700700 | H | -0.97886500 | 5.43694800  | 4.60688200  |
| H  | 3.34753800  | 3.00929200  | -2.46543600 | H | -3.21277700 | 2.94766600  | 6.10625900  |
| H  | 3.61310800  | 2.84276500  | 1.71060200  | H | -1.79363000 | 2.99530900  | 5.03471700  |
| H  | 8.49132400  | -1.31389100 | 0.63017900  | H | -4.50933000 | 0.46075200  | 5.90285900  |
| H  | 8.35937700  | -0.04806600 | -0.57961900 | H | -3.53533200 | -0.34620600 | 1.86344600  |
| H  | 9.96629100  | 0.21720400  | 2.02868800  | H | -4.67706700 | -1.19823100 | 3.95827300  |
| H  | 9.76823900  | 1.47873400  | 0.81820400  | H | 0.29922700  | -2.21539100 | -6.45515100 |
| H  | 6.40638100  | 0.14731500  | 3.69095000  | H | 1.05135100  | -6.01681700 | -2.99043300 |
| H  | 8.03497400  | -0.55672700 | 3.70670700  | H | -6.98555800 | 0.25738800  | -3.35585500 |
| H  | 6.88227400  | -0.98589600 | 2.40723900  | H | -6.61573000 | -1.48011800 | -3.51569600 |
| H  | 10.87039300 | -0.14259300 | -0.93995600 | H | -8.28297400 | -0.92469000 | -3.60162900 |
| H  | 6.56683300  | -3.54893300 | 1.27790500  | H | 1.62730200  | 8.19364700  | -3.39189300 |
| H  | 6.43019600  | -4.27935300 | 2.87461100  | H | 7.13048200  | 2.59441600  | -1.75108000 |
| H  | 4.29603500  | -5.07416300 | 3.67132100  | H | 5.89070000  | 2.08704600  | 0.76578800  |
| H  | 4.78923600  | -4.12727600 | -0.48881700 | H | 1.00373000  | 8.57996800  | 0.41336800  |
| H  | 1.85939300  | -5.36881500 | 3.31296900  | H | -4.85537100 | 6.56014000  | -1.57228400 |
| H  | 2.37758200  | -4.41243700 | -0.85652300 | H | -5.95915800 | 4.90351300  | 0.65696500  |
| H  | 0.88568800  | -5.05635400 | 1.06638200  | H | 10.98953000 | -1.41650300 | 0.28125000  |
| H  | 6.66562200  | -6.57094600 | 1.84143400  | H | 10.11373000 | -1.71530000 | -1.22538100 |
| H  | -5.69413700 | 5.15389200  | -2.24730000 | H | 8.05967200  | -5.54826900 | 1.45383600  |
| H  | -3.99254500 | 5.43482500  | -2.63212500 | H | 6.80031200  | -5.83455300 | 0.24167600  |
| H  | -2.32476300 | 3.77261000  | -1.13412700 | H | -3.50677100 | -2.79355000 | -5.65322300 |
| H  | -4.73319900 | 3.39397300  | 2.29233100  | H | -2.28914400 | -2.83286100 | -4.33479600 |
| H  | -3.07277900 | -4.33461800 | -4.91660600 | H | 4.83323300  | -0.37904500 | -6.42639700 |
| H  | -5.29198900 | -3.33815100 | 0.62853100  | H | 4.29279500  | 1.28466600  | -6.11866300 |
| H  | -3.59069100 | -3.26904500 | 0.15180500  | H | -3.28002500 | 3.79912200  | 4.55586800  |
| H  | -3.84945400 | -5.26702400 | -0.80044500 | H | 1.82142900  | 5.20212800  | 3.65598400  |
| H  | -5.92577000 | -2.98512800 | -1.78948600 | H | 0.43880900  | 6.27200000  | 5.27001800  |
| H  | -3.03759700 | -2.48109000 | -2.29242100 | H | 0.25236700  | 1.73883600  | -4.64902300 |
| H  | -8.86572800 | -0.37038400 | -0.01303700 | C | -1.88195600 | -5.20470600 | 7.04095900  |

|   |             |             |             |   |             |             |             |
|---|-------------|-------------|-------------|---|-------------|-------------|-------------|
| C | -0.70665000 | -5.36467700 | 6.06419600  | O | -1.21754600 | 2.91939300  | -2.45861700 |
| H | -0.59476600 | -6.42320600 | 5.80144300  | N | -1.51643700 | 0.05846500  | -1.63487000 |
| H | 0.22331800  | -5.06770500 | 6.56436900  | C | -0.76791700 | -0.98572000 | -2.06753000 |
| H | -1.99820400 | -4.15853200 | 7.34329100  | O | -1.25801100 | -2.09742800 | -2.34701200 |
| H | -2.82092300 | -5.52188700 | 6.57577400  | N | 0.59233800  | -0.80412400 | -2.17938600 |
| H | -1.73348300 | -5.80349200 | 7.94598500  | C | 1.37334400  | 0.16510100  | -1.42371300 |
| C | -0.90523500 | -4.54161300 | 4.81179100  | C | 1.22188500  | 0.12252800  | 0.12388700  |
| C | -0.54264900 | -3.19003600 | 4.77400000  | C | 0.01281200  | 0.89074100  | 0.62599100  |
| C | -1.54044600 | -5.07848300 | 3.68268300  | O | -0.76917500 | 0.43533500  | 1.50844200  |
| C | -0.81010200 | -2.39359000 | 3.66156600  | H | 1.18579400  | 1.17800400  | -1.77835800 |
| C | -1.81241700 | -4.30349900 | 2.55789100  | H | 2.41920900  | -0.05365900 | -1.65327600 |
| C | -1.44991500 | -2.95011800 | 2.54627100  | H | 2.06127100  | 0.72752500  | 0.49351300  |
| O | -1.75055200 | -2.22239400 | 1.43369800  | H | -2.48943200 | -0.14704600 | -1.42484000 |
| H | -0.04509700 | -2.74696900 | 5.63407900  | H | 1.05782300  | -1.68288800 | -2.39499100 |
| H | -1.83484700 | -6.12543800 | 3.68441500  | O | -0.19991700 | 2.09401600  | 0.22010600  |
| H | -0.52203800 | -1.34638200 | 3.64771700  | H | -1.26574600 | 1.02854000  | -1.80750700 |
| H | -2.30229600 | -4.73422700 | 1.68991300  | C | 1.35708400  | -1.28612200 | 0.69819100  |
| H | -1.36364400 | -1.32584500 | 1.49033500  | H | 2.29811200  | -1.73353000 | 0.36879800  |
| C | -0.10715200 | 3.05268400  | -3.00390200 | H | 1.35488100  | -1.27424000 | 1.79006200  |
| O | 0.98921300  | 3.34264000  | -2.38729500 | H | 0.54581100  | -1.93733300 | 0.36953500  |

**(5S,6S)-Me<sub>2</sub>DHU-ES-II (*Sm*DHPase)**

|   |             |             |             |   |             |             |             |
|---|-------------|-------------|-------------|---|-------------|-------------|-------------|
| C | 1.91702400  | 8.39404000  | -3.11270200 | O | 1.50304900  | 3.87239000  | 1.72237600  |
| C | 1.65007900  | 7.41535900  | -2.02551900 | C | -2.22360800 | -4.23028800 | 7.53374200  |
| N | 1.50439900  | 7.75148500  | -0.68719200 | C | -1.22037600 | -4.81977200 | 6.53033200  |
| C | 1.51153900  | 6.05687400  | -2.06068500 | C | -1.45835000 | -4.13440500 | 5.21183000  |
| C | 1.29675300  | 6.61450100  | 0.02373600  | C | -2.41363800 | -4.62747000 | 4.31445700  |
| N | 1.29402000  | 5.56993800  | -0.78629900 | C | -0.93756300 | -2.85469100 | 4.99227200  |
| C | 6.35964200  | 1.76629000  | -1.95844900 | C | -2.88639600 | -3.84736000 | 3.26463800  |
| C | 5.17300900  | 2.14707100  | -1.14573700 | C | -1.40424200 | -2.05591100 | 3.95452800  |
| N | 5.11934200  | 2.01555400  | 0.23208400  | C | -2.40771100 | -2.54279100 | 3.11123700  |
| C | 3.95714500  | 2.66454300  | -1.50362400 | O | -2.96716300 | -1.76631000 | 2.14114100  |
| C | 3.90603200  | 2.44472900  | 0.65307400  | C | -2.92573300 | 3.61258800  | 4.69805100  |
| N | 3.17595000  | 2.84060000  | -0.37818900 | C | -3.53958600 | 2.47295800  | 3.95889600  |
| C | 10.30322800 | -1.21624300 | 0.04772200  | N | -3.08844100 | 2.04089300  | 2.71609000  |
| C | 9.97373900  | 0.27743800  | 0.14525700  | C | -4.61822500 | 1.70937700  | 4.32281000  |
| C | 9.42952000  | 0.72772500  | 1.50747600  | C | -3.89390100 | 1.05847900  | 2.33776000  |
| S | 7.70636100  | 0.13151900  | 1.80754000  | N | -4.83000100 | 0.82715000  | 3.28211300  |
| C | 7.55992000  | 0.48312100  | 3.59596500  | C | -4.46820300 | 5.56505900  | -2.48740900 |
| C | 6.73933600  | -5.61448000 | 2.14802100  | C | -4.02685600 | 4.97331400  | -1.20190300 |
| C | 5.89651000  | -4.38905500 | 2.53517400  | N | -4.66249200 | 5.20421300  | 0.00792800  |
| C | 4.43571000  | -4.54308600 | 2.16854400  | C | -2.98840900 | 4.13313100  | -0.90659700 |
| C | 3.44699700  | -4.68773500 | 3.14916100  | C | -4.00757600 | 4.50977700  | 0.96962900  |
| C | 4.04440200  | -4.57045700 | 0.82151200  | N | -2.98969000 | 3.85099200  | 0.44492300  |
| C | 2.10301100  | -4.84454300 | 2.79999800  | C | -3.16672200 | -3.49100800 | -4.43538300 |
| C | 2.70775000  | -4.73349300 | 0.46289800  | C | -4.38037500 | -3.19000000 | -3.58885800 |
| C | 1.73149900  | -4.86338000 | 1.45550100  | O | -5.53139200 | -3.33895400 | -3.99377100 |
| C | 0.12108300  | 5.89563900  | 4.36018300  | N | -4.06707500 | -2.76499000 | -2.33268400 |
| N | 0.96518600  | 5.41135300  | 3.28339600  | C | -5.05285400 | -2.60173700 | -1.28536000 |
| C | 0.63102800  | 4.30212300  | 2.52770500  | C | -5.06148600 | -1.13040700 | -0.84429200 |
| O | -0.55107000 | 3.84313300  | 2.70460300  | O | -4.03151300 | -0.63148600 | -0.34226100 |

|    |             |             |             |   |             |             |             |
|----|-------------|-------------|-------------|---|-------------|-------------|-------------|
| C  | -4.67634100 | -3.51388700 | -0.09655400 | H | -1.36390200 | -5.90288600 | 6.44542600  |
| O  | -4.63425100 | -4.88204800 | -0.46000900 | H | -0.19574000 | -4.65653400 | 6.88475500  |
| N  | -6.17672800 | -0.38836600 | -0.98770700 | H | -2.82683400 | -5.62158400 | 4.46870900  |
| C  | -7.42842300 | -0.74403600 | -1.71006200 | H | -0.19374100 | -2.45606000 | 5.67844200  |
| C  | -7.22940100 | -0.70064700 | -3.22769800 | H | -3.64836400 | -4.21779100 | 2.58709800  |
| C  | -8.39994600 | 0.33220800  | -1.19199400 | H | -1.02885800 | -1.04715700 | 3.81545200  |
| C  | -7.51511500 | 1.58276100  | -1.06497500 | H | -2.43371200 | -0.95522700 | 2.03154100  |
| C  | -6.17509100 | 1.02588200  | -0.56060200 | H | -3.25032800 | -4.39212000 | 7.19164100  |
| C  | 0.31886800  | 2.79188600  | -4.68765000 | H | -5.50161800 | 5.29460100  | -2.73463600 |
| C  | 0.16946600  | 2.77987800  | -3.16905200 | H | -3.82974500 | 5.20006000  | -3.29422900 |
| O  | 1.17745500  | 3.21288600  | -2.50611500 | H | -2.26572800 | 3.69524000  | -1.58167900 |
| O  | -0.90646800 | 2.36326700  | -2.67645200 | H | -4.30479500 | 4.49541900  | 2.00649100  |
| C  | 4.93561700  | -0.20062100 | -5.45289300 | H | -2.94586200 | -4.55685600 | -4.33092500 |
| C  | 4.18153400  | -0.96922500 | -4.37405000 | H | -5.42860200 | -3.41769200 | 0.69499100  |
| S  | 4.75575400  | -2.72590100 | -4.30894300 | H | -3.72212900 | -3.16832400 | 0.31443300  |
| C  | 0.07986500  | -6.07653600 | -3.41656500 | H | -4.06896100 | -4.99215700 | -1.25257100 |
| C  | 0.71092400  | -4.70257200 | -3.63185800 | H | -6.00969800 | -2.91703500 | -1.70117700 |
| O  | 1.58076900  | -4.24499500 | -2.87114200 | H | -3.08442900 | -2.74540000 | -2.05930400 |
| C  | -0.21754000 | -6.42434900 | -1.95469500 | H | -8.78895700 | 0.04301200  | -0.20892900 |
| C  | -1.61774200 | -6.01877000 | -1.49058800 | H | -9.25101700 | 0.47005200  | -1.86287800 |
| O  | -2.51858400 | -5.72182200 | -2.27939100 | H | -7.93006600 | 2.33158200  | -0.38506100 |
| N  | -1.82652600 | -6.06432800 | -0.15371300 | H | -7.38743600 | 2.05911400  | -2.04177200 |
| N  | 0.33648800  | -4.05574700 | -4.75495800 | H | -6.10777100 | 1.07413400  | 0.53217300  |
| C  | 0.89637400  | -2.76937200 | -5.15833800 | H | -5.30016800 | 1.54457600  | -0.96215600 |
| Zn | -1.54793600 | 2.69738700  | 1.44464300  | H | -7.75748500 | -1.74113000 | -1.40552500 |
| Zn | 1.24907800  | 3.54292800  | -0.40865500 | H | -0.51195900 | 2.27046600  | -5.16436600 |
| O  | -0.34761100 | 2.50608100  | -0.04699600 | H | 0.34232500  | 3.82702700  | -5.04640500 |
| H  | 1.12037100  | 9.14195000  | -3.20291500 | H | 3.11184800  | -0.95974100 | -4.59310400 |
| H  | 2.85998800  | 8.93215500  | -2.96035000 | H | 4.33032600  | -0.50599700 | -3.39539100 |
| H  | 1.55959800  | 5.38019000  | -2.89779000 | H | 3.72980100  | -3.21280000 | -3.57642800 |
| H  | 1.15844200  | 6.58358400  | 1.09508500  | H | 6.01469100  | -0.20247000 | -5.26785000 |
| H  | 6.61103100  | 0.70586900  | -1.84321700 | H | -0.14559600 | -7.51052800 | -1.82039800 |
| H  | 6.15682700  | 1.94845600  | -3.01594900 | H | 0.53919600  | -5.98142900 | -1.30110400 |
| H  | 3.56847000  | 2.90281700  | -2.48081200 | H | -2.75286700 | -5.83066600 | 0.19040600  |
| H  | 3.58190700  | 2.47309300  | 1.68143200  | H | -1.09887900 | -6.31746600 | 0.49477300  |
| H  | 9.26652000  | 0.56135700  | -0.64465300 | H | -0.83494300 | -6.18284900 | -4.00528300 |
| H  | 10.88268700 | 0.86224300  | -0.04346600 | H | 0.68200600  | -1.99886100 | -4.41167900 |
| H  | 10.05386400 | 0.32973500  | 2.31469300  | H | 1.97728200  | -2.85211500 | -5.29340700 |
| H  | 9.43262800  | 1.81935600  | 1.58292600  | H | -0.42725000 | -4.43782800 | -5.29136500 |
| H  | 6.56017400  | 0.17247600  | 3.90631200  | H | 0.08428300  | 5.21340300  | 5.21974700  |
| H  | 7.68640200  | 1.54803400  | 3.80578000  | H | -0.89642900 | 6.03238000  | 3.99268300  |
| H  | 8.29692500  | -0.09374500 | 4.15936200  | H | -3.38350900 | 3.71262700  | 5.68554500  |
| H  | 11.05387000 | -1.50054300 | 0.79303100  | H | -1.84947400 | 3.47426000  | 4.81335500  |
| H  | 6.30845000  | -3.50037200 | 2.03866100  | H | -5.23077700 | 1.71807100  | 5.21002800  |
| H  | 5.98570800  | -4.21059300 | 3.61302100  | H | -3.85205600 | 0.51907100  | 1.40154200  |
| H  | 3.73205300  | -4.67402400 | 4.19852100  | H | -5.48936500 | 0.06368200  | 3.26067500  |
| H  | 4.79698500  | -4.46247000 | 0.04378300  | H | 0.44167700  | -2.47696000 | -6.10568200 |
| H  | 1.34705500  | -4.93735800 | 3.57460500  | H | 0.80907700  | -6.79470000 | -3.81085200 |
| H  | 2.43193900  | -4.75074300 | -0.58731200 | H | -6.83643600 | 0.27072200  | -3.54485500 |
| H  | 0.68388200  | -4.95099900 | 1.18127100  | H | -6.55725400 | -1.48920600 | -3.56988000 |
| H  | 6.37743500  | -6.51435600 | 2.65515500  | H | -8.19222500 | -0.85464400 | -3.72740100 |



|   |             |             |             |   |             |             |             |
|---|-------------|-------------|-------------|---|-------------|-------------|-------------|
| H | 1.98683500  | 7.86815000  | -4.06685400 | C | -0.58643600 | -2.16931900 | -0.98750000 |
| H | 7.24713100  | 2.34878600  | -1.68514300 | O | -1.30660100 | -2.95898800 | -1.60148800 |
| H | 5.86178500  | 1.61747400  | 0.80826700  | N | 0.75618400  | -2.24648000 | -0.93119400 |
| H | 1.55035000  | 8.68295400  | -0.30126300 | C | 1.55450100  | -1.05814100 | -0.61068300 |
| H | -4.40650200 | 6.65997100  | -2.48219000 | C | 1.00309800  | -0.39759600 | 0.67031900  |
| H | -5.47215900 | 5.78977500  | 0.15107900  | C | -0.51194600 | -0.35613400 | 0.66749000  |
| H | 9.41746700  | -1.83656500 | 0.21215400  | O | -1.16459800 | 0.31615800  | 1.48987200  |
| H | 10.70581000 | -1.45912400 | -0.93991000 | H | 2.56593800  | -1.41738900 | -0.39793100 |
| H | 7.78985300  | -5.47012900 | 2.42075200  | H | 1.30013000  | 0.65435000  | 0.67716400  |
| H | 6.69543000  | -5.80182700 | 1.07073800  | H | -2.19647500 | -1.07380400 | -0.27092100 |
| H | -2.12208100 | -4.68469100 | 8.52622000  | H | 1.15053300  | -2.93664400 | -1.57377000 |
| H | -2.07546500 | -3.15130200 | 7.63943900  | C | 1.51691200  | -1.06255800 | 1.96164800  |
| H | -3.39989300 | -3.27096400 | -5.47944100 | H | 2.60966400  | -1.01486000 | 1.98536100  |
| H | -2.28747500 | -2.93157700 | -4.11123000 | H | 1.13130500  | -0.54229100 | 2.84073300  |
| H | 4.76509300  | -0.63447000 | -6.44211300 | H | 1.22972600  | -2.11439700 | 2.02074800  |
| H | 4.59927900  | 0.84157600  | -5.47546300 | H | -0.71331900 | 2.33080400  | -0.94544300 |
| H | -3.06128900 | 4.56014600  | 4.16500700  | C | 1.58871100  | -0.10940700 | -1.81139900 |
| H | 1.95922600  | 5.57833200  | 3.34513700  | H | 2.26627000  | 0.72564100  | -1.63567600 |
| H | 0.50179500  | 6.86130300  | 4.70273500  | H | 1.93322700  | -0.65062500 | -2.69545500 |
| H | 1.26771600  | 2.33179600  | -4.97825900 | H | 0.59766800  | 0.30080300  | -2.02226200 |
| N | -1.16758200 | -1.12741800 | -0.23895400 |   |             |             |             |

**(5S,6S)-Me<sub>2</sub>DHU-TS1-II (*Sm*DHPase)**

|   |             |             |             |   |             |             |             |
|---|-------------|-------------|-------------|---|-------------|-------------|-------------|
| C | 0.40223300  | 8.53661400  | -2.91220800 | O | -1.61898600 | 3.66462400  | 2.56045000  |
| C | 0.18261100  | 7.50707100  | -1.86389500 | O | 0.49101900  | 3.94595200  | 1.77298000  |
| N | -0.16258400 | 7.77524400  | -0.54743300 | C | -1.82613500 | -4.74935900 | 7.49848600  |
| C | 0.29527600  | 6.14894200  | -1.92459200 | C | -0.51152200 | -4.84075300 | 6.71136400  |
| C | -0.23371700 | 6.60091400  | 0.12801300  | C | -0.67955600 | -4.14503600 | 5.38522800  |
| N | 0.03697600  | 5.59303100  | -0.68554300 | C | -1.21537800 | -4.82582600 | 4.28380100  |
| C | 5.90625600  | 2.78979800  | -1.61764500 | C | -0.48436200 | -2.76384000 | 5.27457500  |
| C | 4.67545200  | 3.09725100  | -0.84434600 | C | -1.56490900 | -4.15325100 | 3.11801500  |
| N | 4.58180100  | 2.96178400  | 0.53075300  | C | -0.83101000 | -2.07207300 | 4.11730400  |
| C | 3.42258700  | 3.46117300  | -1.25536500 | C | -1.38234900 | -2.76728700 | 3.03376000  |
| C | 3.30703100  | 3.22721300  | 0.89787500  | O | -1.76680900 | -2.14861100 | 1.88989300  |
| N | 2.57513000  | 3.52120400  | -0.16739200 | C | -3.80463800 | 2.87765600  | 4.67731500  |
| C | 10.23878800 | 0.53112300  | 0.52705800  | C | -4.06379000 | 1.55667600  | 4.03088600  |
| C | 9.73216000  | 1.87419300  | 1.06497000  | N | -3.55064600 | 1.21052000  | 2.78554800  |
| C | 8.86229100  | 1.77348800  | 2.32530800  | C | -4.80327300 | 0.50631300  | 4.50831100  |
| S | 7.19232200  | 1.07045700  | 1.96497700  | C | -3.98115200 | -0.01706700 | 2.52158400  |
| C | 6.63290300  | 0.67546500  | 3.66029100  | N | -4.74275000 | -0.47472800 | 3.53775700  |
| C | 7.43740200  | -4.45502100 | 2.46294900  | C | -5.39679300 | 4.61134900  | -2.55328000 |
| C | 6.51020300  | -3.26784600 | 2.76882700  | C | -4.87010500 | 3.96257800  | -1.32034500 |
| C | 5.07154300  | -3.53885600 | 2.38325100  | N | -5.57549800 | 3.93129700  | -0.12675000 |
| C | 4.09320000  | -3.80381200 | 3.34964700  | C | -3.69334300 | 3.31228700  | -1.05252700 |
| C | 4.69640800  | -3.56942200 | 1.03216800  | C | -4.82866300 | 3.28434300  | 0.79721600  |
| C | 2.77512500  | -4.08553000 | 2.98159200  | N | -3.67995700 | 2.89661500  | 0.26795300  |
| C | 3.38535200  | -3.85541900 | 0.65389200  | C | -2.43202100 | -4.04557300 | -4.49458100 |
| C | 2.41899600  | -4.10945100 | 1.63257200  | C | -3.66545800 | -3.92908000 | -3.62092200 |
| C | -1.20207000 | 5.66939100  | 4.47133000  | O | -4.74683400 | -4.42790400 | -3.93014100 |
| N | -0.29919600 | 5.31737900  | 3.38182100  | N | -3.45386100 | -3.25242400 | -2.45522700 |
| C | -0.47852700 | 4.24013700  | 2.53494300  | C | -4.40757400 | -3.24861200 | -1.36320400 |

|    |             |             |             |   |             |             |             |
|----|-------------|-------------|-------------|---|-------------|-------------|-------------|
| C  | -4.75118300 | -1.79569700 | -1.00228200 | H | 1.38908800  | -4.29845600 | 1.34418000  |
| O  | -3.88874700 | -1.06429500 | -0.47132600 | H | 7.11988000  | -5.34925200 | 3.00826800  |
| C  | -3.78185800 | -3.94742900 | -0.13461600 | H | -0.23971900 | -5.89265400 | 6.56460900  |
| O  | -3.41885000 | -5.29078900 | -0.40911600 | H | 0.29935400  | -4.38105400 | 7.28880400  |
| N  | -5.98794900 | -1.31471000 | -1.24504400 | H | -1.38489800 | -5.89819200 | 4.35196200  |
| C  | -7.13430900 | -1.98918600 | -1.91122200 | H | -0.07528400 | -2.21417100 | 6.11953900  |
| C  | -6.96909900 | -2.03576600 | -3.43363400 | H | -2.00161100 | -4.67526300 | 2.27340400  |
| C  | -8.31739700 | -1.11677600 | -1.44840400 | H | -0.68815500 | -0.99833000 | 4.04804400  |
| C  | -7.72639700 | 0.30143000  | -1.40014200 | H | -1.52744500 | -1.19174900 | 1.89859100  |
| C  | -6.30131400 | 0.07835000  | -0.87340300 | H | -2.64361900 | -5.21954900 | 6.94274000  |
| C  | 0.03880800  | 2.91295400  | -4.67696700 | H | -6.34924000 | 4.17307300  | -2.87249600 |
| C  | -0.19580800 | 2.80741300  | -3.17698300 | H | -4.68302500 | 4.48199900  | -3.36905500 |
| O  | 0.67688800  | 3.37198700  | -2.42614600 | H | -2.87796300 | 3.09133600  | -1.72813200 |
| O  | -1.20372000 | 2.18271100  | -2.76488400 | H | -5.14611900 | 3.10639800  | 1.81205900  |
| C  | 4.98823100  | 0.64338000  | -5.17544600 | H | -1.94158000 | -4.99195600 | -4.25305200 |
| C  | 5.50400600  | -0.79105100 | -5.07942600 | H | -4.51543100 | -3.98086000 | 0.68063200  |
| S  | 5.20119100  | -1.65708000 | -6.68437600 | H | -2.92901800 | -3.35324500 | 0.20725200  |
| C  | 1.43963000  | -5.95324700 | -3.20718800 | H | -2.83740300 | -5.30774600 | -1.19785000 |
| C  | 1.67893800  | -4.46413600 | -3.44734600 | H | -5.27704400 | -3.81065900 | -1.70480100 |
| O  | 2.30400400  | -3.75875200 | -2.64246600 | H | -2.52212400 | -2.88533200 | -2.24988100 |
| C  | 1.15179300  | -6.30586900 | -1.74781000 | H | -8.63764000 | -1.42417400 | -0.44616800 |
| C  | -0.29190600 | -6.02923800 | -1.33268100 | H | -9.17716800 | -1.20570400 | -2.11675100 |
| O  | -1.17685600 | -5.78201000 | -2.15656900 | H | -8.30047700 | 0.98031400  | -0.76335700 |
| N  | -0.55548000 | -6.12645200 | -0.00899400 | H | -7.69918000 | 0.73538900  | -2.40471700 |
| N  | 1.25045300  | -3.98613500 | -4.63486900 | H | -6.24715900 | 0.18135700  | 0.21743800  |
| C  | 1.46224700  | -2.60521100 | -5.05326800 | H | -5.56008500 | 0.76100400  | -1.29732500 |
| Zn | -2.15696500 | 2.12615700  | 1.43055500  | H | -7.23367600 | -3.00675800 | -1.52381500 |
| Zn | 0.54015000  | 3.62006300  | -0.33583900 | H | -0.71544300 | 2.35062800  | -5.22762900 |
| O  | -0.69122700 | 2.01439500  | -0.19433600 | H | 0.00832500  | 3.96285500  | -4.98759100 |
| H  | -0.49199800 | 9.14444500  | -3.09374700 | H | 4.99033000  | -1.33330900 | -4.28075400 |
| H  | 1.21903000  | 9.22013700  | -2.65248700 | H | 6.57690100  | -0.79953900 | -4.87116400 |
| H  | 0.56475700  | 5.52221900  | -2.75719800 | H | 5.77022900  | -2.83258300 | -6.34874300 |
| H  | -0.45983600 | 6.52474300  | 1.18160100  | H | 5.51025500  | 1.20203100  | -5.95787500 |
| H  | 6.19805700  | 1.73921800  | -1.50861800 | H | 1.33533100  | -7.37563800 | -1.58917000 |
| H  | 5.73377100  | 2.98509000  | -2.67806100 | H | 1.84003500  | -5.76868000 | -1.08836100 |
| H  | 3.04874500  | 3.63255500  | -2.25184600 | H | -1.51296100 | -5.96565400 | 0.29198700  |
| H  | 2.93493300  | 3.19228600  | 1.90967700  | H | 0.17022000  | -6.28141300 | 0.67203600  |
| H  | 9.18259300  | 2.41341500  | 0.28235600  | H | 0.62860300  | -6.32276300 | -3.84002100 |
| H  | 10.58954500 | 2.50985600  | 1.31863700  | H | 1.04273000  | -1.91231000 | -4.31875300 |
| H  | 9.33719000  | 1.11633400  | 3.06178500  | H | 2.52747700  | -2.39403300 | -5.18398300 |
| H  | 8.73013400  | 2.75791000  | 2.78403700  | H | 0.66993700  | -4.57917400 | -5.20739500 |
| H  | 5.63467000  | 0.24064700  | 3.57757200  | H | -1.07814200 | 5.02747000  | 5.35329200  |
| H  | 6.58725700  | 1.57084000  | 4.28490000  | H | -2.23111500 | 5.58077800  | 4.12334500  |
| H  | 7.29717900  | -0.06164900 | 4.11670100  | H | -4.30364800 | 2.92819300  | 5.64840700  |
| H  | 10.84316100 | 0.01187400  | 1.27859700  | H | -2.73449200 | 3.04042700  | 4.81889300  |
| H  | 6.87454000  | -2.38195300 | 2.23186100  | H | -5.34665200 | 0.37538100  | 5.43036500  |
| H  | 6.56423900  | -3.03143100 | 3.83833800  | H | -3.77866500 | -0.58275300 | 1.62265800  |
| H  | 4.36644400  | -3.78836300 | 4.40237100  | H | -5.13835000 | -1.40120800 | 3.59467300  |
| H  | 5.44328800  | -3.36908700 | 0.26690600  | H | 0.96136900  | -2.45317700 | -6.01021000 |
| H  | 2.02580800  | -4.27405200 | 3.74498100  | H | 2.35953800  | -6.46320700 | -3.51870000 |
| H  | 3.11985000  | -3.87584700 | -0.39893400 | H | -6.79606100 | -1.03522300 | -3.84336000 |

|   |             |             |             |   |             |             |             |
|---|-------------|-------------|-------------|---|-------------|-------------|-------------|
| H | -6.14659600 | -2.69159400 | -3.72579300 | N | -0.90369700 | -0.54043400 | -0.55827500 |
| H | -7.88200300 | -2.43604700 | -3.88800100 | C | -0.23687500 | -1.61456200 | -1.15637700 |
| H | 0.66610100  | 8.04716600  | -3.85158300 | O | -0.85389600 | -2.45853800 | -1.81066300 |
| H | 6.75885700  | 3.40225300  | -1.30242300 | N | 1.09537000  | -1.69917100 | -0.93538900 |
| H | 5.33932900  | 2.64298100  | 1.13564700  | C | 1.85729200  | -0.49911200 | -0.60780500 |
| H | -0.32677800 | 8.68861200  | -0.15020000 | C | 1.16599000  | 0.23176800  | 0.57126300  |
| H | -5.55508800 | 5.68702900  | -2.41310800 | C | -0.36879600 | 0.29672600  | 0.42635400  |
| H | -6.49327200 | 4.32155100  | 0.02927900  | O | -1.09418500 | 0.42400600  | 1.50729200  |
| H | 9.41251200  | -0.12970700 | 0.24900200  | H | 2.82974300  | -0.84176900 | -0.23922000 |
| H | 10.86467800 | 0.68062800  | -0.35757200 | H | 1.52443600  | 1.25943100  | 0.59555800  |
| H | 8.47109900  | -4.23240200 | 2.74794700  | H | -1.92019900 | -0.66490900 | -0.55401000 |
| H | 7.42759100  | -4.69811200 | 1.39587800  | H | 1.55032900  | -2.40598900 | -1.51598300 |
| H | -1.75118200 | -5.24526400 | 8.47291600  | C | 1.53996500  | -0.42181000 | 1.91237200  |
| H | -2.10180100 | -3.70408100 | 7.67168500  | H | 2.62662300  | -0.39562000 | 2.04165200  |
| H | -2.73924000 | -4.05308000 | -5.54241600 | H | 1.07629200  | 0.11226500  | 2.74252100  |
| H | -1.71765300 | -3.24097400 | -4.30779600 | H | 1.23125200  | -1.46784600 | 1.95385800  |
| H | 3.91664300  | 0.66718400  | -5.39659500 | H | -0.98983900 | 1.95044500  | -1.15164800 |
| H | 5.14539900  | 1.15914800  | -4.22298100 | C | 2.08279400  | 0.32913500  | -1.87693500 |
| H | -4.16816600 | 3.70809800  | 4.06277000  | H | 2.71315800  | 1.19730400  | -1.68736800 |
| H | 0.66602100  | 5.60331500  | 3.46279400  | H | 2.57749600  | -0.29745600 | -2.62660600 |
| H | -1.01671000 | 6.70483800  | 4.76735200  | H | 1.13441100  | 0.67345400  | -2.29362300 |
| H | 1.03586900  | 2.53556900  | -4.92273900 |   |             |             |             |

**(5S,6S)-Me<sub>2</sub>DHU-INT1-II (*Sm*DHPase)**

|   |             |             |             |   |             |             |             |
|---|-------------|-------------|-------------|---|-------------|-------------|-------------|
| C | 0.25855000  | 8.49265200  | -2.97417100 | N | -0.45903700 | 5.27167600  | 3.30756200  |
| C | 0.02320200  | 7.46625000  | -1.92899200 | C | -0.65854700 | 4.20176400  | 2.45550600  |
| N | -0.39403400 | 7.72267400  | -0.63153800 | O | -1.80379900 | 3.63912400  | 2.48041600  |
| C | 0.18939400  | 6.11466400  | -1.98162700 | O | 0.30539000  | 3.90315800  | 1.68411400  |
| C | -0.45251700 | 6.54710000  | 0.04272000  | C | -1.77979500 | -4.76949700 | 7.50560600  |
| N | -0.10629500 | 5.54956400  | -0.75552200 | C | -0.43219900 | -4.52686800 | 6.81158000  |
| C | 5.86277900  | 2.85953700  | -1.61150600 | C | -0.63711800 | -3.84310700 | 5.48212200  |
| C | 4.62820700  | 3.17333200  | -0.84777000 | C | -1.05276600 | -4.57912000 | 4.36280000  |
| N | 4.52620300  | 3.05036600  | 0.52770600  | C | -0.54737400 | -2.45312000 | 5.35382700  |
| C | 3.37814000  | 3.53207900  | -1.27013100 | C | -1.37513200 | -3.95453400 | 3.16407700  |
| C | 3.24960900  | 3.31514800  | 0.88504600  | C | -0.86684500 | -1.80811700 | 4.15956600  |
| N | 2.52377700  | 3.60011600  | -0.18771400 | C | -1.28491500 | -2.55937600 | 3.05285300  |
| C | 10.22441500 | 0.69678700  | 0.57269500  | O | -1.62362900 | -2.00451400 | 1.86583300  |
| C | 9.68332900  | 2.02829300  | 1.10591000  | C | -3.88569600 | 2.80115700  | 4.62546700  |
| C | 8.79016800  | 1.90682500  | 2.34829700  | C | -4.12191900 | 1.43864100  | 4.06271300  |
| S | 7.13914800  | 1.17915000  | 1.95039000  | N | -3.64245600 | 1.06518500  | 2.81367200  |
| C | 6.55855600  | 0.74358400  | 3.62858500  | C | -4.78333600 | 0.37160300  | 4.61027000  |
| C | 7.50657600  | -4.32981400 | 2.52300500  | C | -4.00906100 | -0.19590400 | 2.61302800  |
| C | 6.58475700  | -3.14119500 | 2.83721800  | N | -4.70264000 | -0.64633600 | 3.67787600  |
| C | 5.14976800  | -3.39127200 | 2.42437400  | C | -5.46699000 | 4.46009700  | -2.62502400 |
| C | 4.14145100  | -3.60664500 | 3.37193600  | C | -4.94801000 | 3.80781000  | -1.38783200 |
| C | 4.80791400  | -3.44890600 | 1.06541500  | N | -5.68719900 | 3.74658800  | -0.21632300 |
| C | 2.82610400  | -3.86567200 | 2.97743400  | C | -3.76192700 | 3.18519900  | -1.08882700 |
| C | 3.50035200  | -3.71282600 | 0.66134900  | C | -4.95339000 | 3.11254200  | 0.72503600  |
| C | 2.50338300  | -3.91655100 | 1.62100000  | N | -3.77777200 | 2.76056800  | 0.22945700  |
| C | -1.33538900 | 5.64056200  | 4.41746800  | C | -2.32685300 | -4.15057400 | -4.49496200 |

|    |             |             |             |   |             |             |             |
|----|-------------|-------------|-------------|---|-------------|-------------|-------------|
| C  | -3.55723300 | -4.02809500 | -3.61373500 | H | 4.38874200  | -3.57060000 | 4.43061600  |
| O  | -4.62956300 | -4.55787100 | -3.90472900 | H | 5.57818200  | -3.28664300 | 0.31450500  |
| N  | -3.35732800 | -3.31226100 | -2.46889700 | H | 2.05338000  | -4.01602000 | 3.72592100  |
| C  | -4.29959700 | -3.32881100 | -1.36461100 | H | 3.26045300  | -3.75520400 | -0.39690000 |
| C  | -4.71868400 | -1.89262800 | -1.01212500 | H | 1.47664400  | -4.08491200 | 1.30955600  |
| O  | -3.90847600 | -1.11757100 | -0.46422900 | H | 7.17357000  | -5.23127300 | 3.04678700  |
| C  | -3.63327000 | -3.97810200 | -0.13037200 | H | 0.08375300  | -5.48476700 | 6.67207000  |
| O  | -3.25034400 | -5.32159700 | -0.37602200 | H | 0.21065400  | -3.91603800 | 7.45624500  |
| N  | -5.97851200 | -1.47823500 | -1.27117700 | H | -1.13688800 | -5.66119700 | 4.43863900  |
| C  | -7.07987300 | -2.20904200 | -1.95142700 | H | -0.23138500 | -1.85903500 | 6.20871800  |
| C  | -6.90754600 | -2.22096400 | -3.47328500 | H | -1.70517500 | -4.52265200 | 2.30099300  |
| C  | -8.31388700 | -1.41739200 | -1.47739400 | H | -0.79218100 | -0.72830200 | 4.07593300  |
| C  | -7.81083100 | 0.03352300  | -1.41137600 | H | -1.40319100 | -1.03558600 | 1.81080000  |
| C  | -6.37144500 | -0.10850100 | -0.89276000 | H | -2.42979300 | -5.39648400 | 6.88698800  |
| C  | 0.01879400  | 2.99755300  | -4.75268100 | H | -6.40066500 | 4.00005500  | -2.96735700 |
| C  | -0.18723200 | 2.80369700  | -3.26014100 | H | -4.73496000 | 4.36106000  | -3.42874600 |
| O  | 0.64863400  | 3.38100400  | -2.48254100 | H | -2.92232100 | 2.98659800  | -1.74062400 |
| O  | -1.15320600 | 2.09577300  | -2.87065700 | H | -5.29856800 | 2.91642900  | 1.72769700  |
| C  | 5.00701900  | 0.67437500  | -5.16122800 | H | -1.81654500 | -5.07888500 | -4.22483400 |
| C  | 5.44712700  | -0.74011200 | -4.78909700 | H | -4.35116400 | -4.00485100 | 0.69911100  |
| S  | 5.49657500  | -1.78343400 | -6.31437800 | H | -2.78562000 | -3.35794300 | 0.17817200  |
| C  | 1.61561500  | -5.94458600 | -3.12435300 | H | -2.67246700 | -5.34934600 | -1.16736400 |
| C  | 1.81699600  | -4.45661500 | -3.40052200 | H | -5.14528500 | -3.93777700 | -1.68555700 |
| O  | 2.43254400  | -3.71696400 | -2.62005100 | H | -2.42608600 | -2.93664100 | -2.26176200 |
| C  | 1.32425300  | -6.26480800 | -1.65853900 | H | -8.61275400 | -1.75667500 | -0.47888000 |
| C  | -0.13107300 | -6.01871500 | -1.26563000 | H | -9.16788700 | -1.54973900 | -2.14602300 |
| O  | -1.01605100 | -5.83324600 | -2.10577600 | H | -8.42334200 | 0.66717600  | -0.76365500 |
| N  | -0.40268200 | -6.08100100 | 0.05872400  | H | -7.81485200 | 0.48168600  | -2.41011100 |
| N  | 1.36551800  | -4.01620700 | -4.59455100 | H | -6.31558300 | -0.00564300 | 0.19831100  |
| C  | 1.54268500  | -2.63985700 | -5.03963900 | H | -5.67442000 | 0.61903700  | -1.31813100 |
| Zn | -2.35221800 | 2.00401900  | 1.48944300  | H | -7.11873100 | -3.23733700 | -1.58249600 |
| Zn | 0.49913500  | 3.61666700  | -0.38431400 | H | -0.67530800 | 2.37962900  | -5.32222800 |
| O  | -0.61211900 | 1.86678400  | -0.41149000 | H | -0.13548500 | 4.04996300  | -5.01505000 |
| H  | -0.64543900 | 9.06770000  | -3.20711600 | H | 4.74997000  | -1.18905000 | -4.07620900 |
| H  | 1.03720200  | 9.20698400  | -2.68216100 | H | 6.44294100  | -0.72607100 | -4.33847000 |
| H  | 0.52138100  | 5.50085400  | -2.80047900 | H | 5.91179000  | -2.92146000 | -5.72210200 |
| H  | -0.72062700 | 6.46439100  | 1.08564000  | H | 5.71235700  | 1.14046400  | -5.85555800 |
| H  | 6.15451900  | 1.81059400  | -1.48952100 | H | 1.53617600  | -7.32401500 | -1.46770000 |
| H  | 5.69570300  | 3.04291800  | -2.67483000 | H | 1.99053100  | -5.68976000 | -1.00848200 |
| H  | 3.01239400  | 3.69467700  | -2.27090900 | H | -1.36575500 | -5.92486800 | 0.34622500  |
| H  | 2.87052900  | 3.27547800  | 1.89412000  | H | 0.32671400  | -6.15848000 | 0.74904700  |
| H  | 9.14007700  | 2.56116300  | 0.31453500  | H | 0.81994300  | -6.35263100 | -3.75293800 |
| H  | 10.52399100 | 2.67806000  | 1.37914800  | H | 1.11047500  | -1.94226700 | -4.31693300 |
| H  | 9.26042000  | 1.25265200  | 3.09036100  | H | 2.60338200  | -2.40853200 | -5.17513600 |
| H  | 8.63413900  | 2.88633700  | 2.81003100  | H | 0.78860300  | -4.63231100 | -5.14583100 |
| H  | 5.57405700  | 0.28389100  | 3.51964100  | H | -1.17863200 | 5.01818200  | 5.30780200  |
| H  | 6.47861000  | 1.62711300  | 4.26649100  | H | -2.37285300 | 5.53581400  | 4.10010000  |
| H  | 7.23301900  | 0.01603000  | 4.08523400  | H | -4.35465100 | 2.89276700  | 5.60859300  |
| H  | 10.82525600 | 0.18639400  | 1.33306900  | H | -2.81762000 | 3.00302000  | 4.72270200  |
| H  | 6.96524300  | -2.24886600 | 2.32204100  | H | -5.28432300 | 0.24901100  | 5.55702600  |
| H  | 6.62424800  | -2.92475200 | 3.91157500  | H | -3.78879200 | -0.78653700 | 1.73350700  |

H -5.04085300 -1.59040200 3.79137000  
H 1.03641000 -2.51768000 -5.99819800  
H 2.55174700 -6.43698900 -3.41496900  
H -6.79024700 -1.20577900 -3.86670500  
H -6.04797200 -2.82541100 -3.76868400  
H -7.79353700 -2.66616200 -3.93905000  
H 0.58594400 8.00400000 -3.89371200  
H 6.71295000 3.47625100 -1.29820000  
H 5.28060500 2.73274200 1.13824200  
H -0.61108200 8.62944600 -0.24444100  
H -5.65609900 5.52880200 -2.47187600  
H -6.62175800 4.10594900 -0.08769300  
H 9.41551300 0.02172300 0.27833000  
H 10.86258700 0.86093800 -0.30046900  
H 8.53771200 -4.12145800 2.82757900  
H 7.51167900 -4.55345200 1.45174600  
H -1.65128600 -5.26886000 8.47234500  
H -2.30230600 -3.82316500 7.68076000  
H -2.64178700 -4.19880500 -5.53922600  
H -1.62686100 -3.32639200 -4.33957600  
H 4.01850200 0.67222400 -5.63080800  
H 4.94939200 1.29565000 -4.26188100  
H -4.29557600 3.58365900 3.97848400  
H 0.50775700 5.55826400 3.36386100

H -1.15033700 6.68359900 4.68506400  
H 1.04884300 2.74677000 -5.02118500  
N -0.88755700 -0.46930600 -0.71581300  
C -0.21822900 -1.59618400 -1.15525100  
O -0.80629900 -2.52237500 -1.73158800  
N 1.12070800 -1.65200300 -0.92865600  
C 1.86748300 -0.42873000 -0.67325500  
C 1.15578100 0.34738400 0.46162700  
C -0.37708800 0.52506500 0.21314700  
O -1.11840300 0.54852100 1.35798800  
H 2.84296400 -0.73527500 -0.27957600  
H 1.57164200 1.35420400 0.49140800  
H -1.89905800 -0.60867200 -0.68923200  
H 1.58267100 -2.38440300 -1.46682200  
C 1.45130000 -0.30900200 1.81588600  
H 2.53279600 -0.32824000 1.98764100  
H 0.97865000 0.24653500 2.62608100  
H 1.10002300 -1.34081400 1.84949900  
H -0.88741600 1.79710400 -1.40004200  
C 2.10035500 0.33084900 -1.98595300  
H 2.69613300 1.23166300 -1.83409600  
H 2.63694700 -0.32280500 -2.68173100  
H 1.15386400 0.61176200 -2.45203500

**(5S,6S)-Me<sub>2</sub>DHU-TS2-II (*Sm*DHPase)**

C 0.81839500 8.35631100 -3.25173900  
C 0.56522700 7.32659600 -2.20142100  
N 0.26380400 7.63591600 -0.88342700  
C 0.59125200 5.95848900 -2.23529200  
C 0.13352100 6.48401300 -0.18286800  
N 0.32372700 5.44202100 -0.97780400  
C 6.03945500 2.38924000 -1.79199200  
C 4.82955600 2.82600700 -1.04883300  
N 4.76544300 2.88466800 0.33223500  
C 3.57122600 3.14742400 -1.48098200  
C 3.50580800 3.21729300 0.68524500  
N 2.75104600 3.37194400 -0.39517600  
C 10.27264700 -0.00726800 0.40092100  
C 8.88713700 0.39685900 0.92431300  
C 8.96182600 1.59446300 1.87463000  
S 7.36129000 2.19898500 2.55606600  
C 6.85237900 0.79684500 3.61457500  
C 7.24283200 -4.77452900 2.53410500  
C 6.40086900 -3.53194500 2.85938300  
C 4.94344500 -3.70057600 2.48743300  
C 3.94496900 -3.79810400 3.46384700  
C 4.56792000 -3.79496500 1.13984200  
C 2.60521300 -3.97347700 3.10763900  
C 3.23528600 -3.97616700 0.77460600  
C 2.24779400 -4.05801900 1.76176700

C -0.86095300 5.83645000 4.24102600  
N 0.02182600 5.42443000 3.16406000  
C -0.21618200 4.33451500 2.35330700  
O -1.38116700 3.82163300 2.38292000  
O 0.75255400 3.98388700 1.60790000  
C -3.59796200 3.18823000 4.56549200  
C -3.94283500 1.84146600 4.02549600  
N -3.51410900 1.42715600 2.77214900  
C -4.66681900 0.82939500 4.59798000  
C -3.97081000 0.19331100 2.59262900  
N -4.67505700 -0.19951800 3.67426900  
C -5.16627400 4.74295000 -2.71086400  
C -4.65899600 4.10902300 -1.45560800  
N -5.39264500 4.09988900 -0.27907500  
C -3.49569200 3.45118800 -1.14034900  
C -4.67649100 3.45917300 0.67387500  
N -3.51709100 3.05317900 0.18475900  
C -2.65584600 -4.11543000 -4.36243500  
C -3.85992600 -3.85518800 -3.47590800  
O -4.96792800 -4.32849600 -3.73053500  
N -3.60379000 -3.09030300 -2.37496700  
C -4.53678300 -3.00174600 -1.26416800  
C -4.84656100 -1.52925400 -0.95101200  
O -3.97481500 -0.79107900 -0.45420300  
C -3.91171500 -3.66331300 -0.01595600

|    |             |             |             |   |             |             |             |
|----|-------------|-------------|-------------|---|-------------|-------------|-------------|
| O  | -3.63267000 | -5.03946700 | -0.22711000 | H | -4.62369900 | -3.61445400 | 0.81757400  |
| N  | -6.08717700 | -1.04356300 | -1.18911000 | H | -3.01819400 | -3.10149200 | 0.26943200  |
| C  | -7.24489600 | -1.72462400 | -1.82442200 | H | -3.06062300 | -5.12884000 | -1.01752200 |
| C  | -7.07698400 | -1.84361800 | -3.34146400 | H | -5.42704700 | -3.55586100 | -1.56224100 |
| C  | -8.41355200 | -0.81232000 | -1.40237700 | H | -2.65254200 | -2.75814500 | -2.18498800 |
| C  | -7.79546000 | 0.59495800  | -1.40092600 | H | -8.74570100 | -1.07612400 | -0.39166500 |
| C  | -6.37907400 | 0.36143100  | -0.85601500 | H | -9.27119400 | -0.90880100 | -2.07250600 |
| C  | -0.02568300 | 2.21293800  | -4.71029600 | H | -8.36131000 | 1.30798000  | -0.79444400 |
| C  | 4.98326700  | 0.16720900  | -5.26404000 | H | -7.75202800 | 0.99055900  | -2.42103000 |
| C  | 5.38718600  | -1.30537500 | -5.28499800 | H | -6.33152800 | 0.49466900  | 0.23256000  |
| S  | 4.94140800  | -2.03524300 | -6.92387700 | H | -5.62244900 | 1.01998800  | -1.29144800 |
| C  | 1.17222500  | -6.11172400 | -2.94493800 | H | -7.36520100 | -2.72208400 | -1.39265000 |
| C  | 1.46238400  | -4.64912600 | -3.27557900 | H | 0.55466300  | 1.31935500  | -4.96571300 |
| O  | 2.10842000  | -3.91228700 | -2.51901200 | H | -1.01440200 | 2.09149300  | -5.15715000 |
| C  | 0.85842600  | -6.36340700 | -1.47087900 | H | 4.86968300  | -1.85751100 | -4.49582000 |
| C  | -0.57675000 | -6.00155800 | -1.09349700 | H | 6.46459900  | -1.40928000 | -5.13362800 |
| O  | -1.43881400 | -5.77004700 | -1.94619200 | H | 5.41682900  | -3.27501700 | -6.68911600 |
| N  | -0.86150700 | -6.01464300 | 0.22863400  | H | 5.50673400  | 0.73446900  | -6.03942400 |
| N  | 1.04978300  | -4.23709500 | -4.49569100 | H | 0.99544300  | -7.42806600 | -1.24542100 |
| C  | 1.30043400  | -2.89349800 | -5.00030400 | H | 1.56147600  | -5.81657100 | -0.83582100 |
| Zn | -2.08209900 | 2.20099000  | 1.43700900  | H | -1.80770100 | -5.76105800 | 0.50285600  |
| Zn | 0.72379000  | 3.48442200  | -0.39083900 | H | -0.14258700 | -6.10831000 | 0.92798800  |
| H  | -0.04769300 | 9.01042000  | -3.40384000 | H | 0.35351700  | -6.49199200 | -3.56120500 |
| H  | 1.67594400  | 8.99039200  | -2.99992500 | H | 0.95958800  | -2.14784500 | -4.27656900 |
| H  | 0.79556400  | 5.30510500  | -3.06667600 | H | 2.36470600  | -2.73807700 | -5.20195600 |
| H  | -0.07133800 | 6.44877000  | 0.87703400  | H | 0.45143100  | -4.84852000 | -5.02897100 |
| H  | 6.27692800  | 1.33825100  | -1.59032500 | H | -0.77199900 | 5.20328000  | 5.13353200  |
| H  | 5.87411200  | 2.49498500  | -2.86621000 | H | -1.89293500 | 5.79456500  | 3.89263200  |
| H  | 3.18766800  | 3.18998500  | -2.48767400 | H | -4.01122500 | 3.31662200  | 5.56931400  |
| H  | 3.15587000  | 3.32516300  | 1.69960000  | H | -2.51569400 | 3.32395600  | 4.60819700  |
| H  | 8.43069600  | -0.45697500 | 1.43844000  | H | -5.15557100 | 0.75043100  | 5.55575300  |
| H  | 8.22618300  | 0.64382100  | 0.08481200  | H | -3.80507000 | -0.42272700 | 1.71935400  |
| H  | 9.61598600  | 1.37944700  | 2.72674700  | H | -5.06869900 | -1.11941900 | 3.80526000  |
| H  | 9.38218000  | 2.46742100  | 1.36410300  | H | 0.75052100  | -2.76467500 | -5.93364800 |
| H  | 5.94939800  | 1.11099600  | 4.14183700  | H | 2.07715300  | -6.66988100 | -3.21530600 |
| H  | 7.63008500  | 0.58151500  | 4.35094100  | H | -6.88059500 | -0.86582300 | -3.79391900 |
| H  | 6.62912400  | -0.09884000 | 3.03261000  | H | -6.26968400 | -2.53105900 | -3.60071700 |
| H  | 10.74672500 | 0.81315000  | -0.14859500 | H | -7.99686000 | -2.24326200 | -3.78263900 |
| H  | 6.82052600  | -2.66937500 | 2.32165000  | H | 1.03569300  | 7.86619700  | -4.20271400 |
| H  | 6.48456600  | -3.30244100 | 3.92797700  | H | 6.92249400  | 2.98393600  | -1.53282600 |
| H  | 4.21865300  | -3.73226300 | 4.51446400  | H | 5.53578600  | 2.67455300  | 0.97221600  |
| H  | 5.32983900  | -3.72568100 | 0.36619700  | H | 0.16789100  | 8.56521500  | -0.50072000 |
| H  | 1.84044900  | -4.03020100 | 3.87677100  | H | -5.34021000 | 5.81717900  | -2.58124300 |
| H  | 2.97056400  | -4.04137300 | -0.27677800 | H | -6.31285000 | 4.49563000  | -0.15343700 |
| H  | 1.20376900  | -4.15441000 | 1.48011900  | H | 10.94154700 | -0.28889700 | 1.22087100  |
| H  | 6.87294600  | -5.64787400 | 3.08006000  | H | 10.19846700 | -0.86350400 | -0.27587800 |
| H  | -6.10564000 | 4.28832300  | -3.04443600 | H | 8.29294800  | -4.62431500 | 2.80654400  |
| H  | -4.43482700 | 4.61712300  | -3.51146100 | H | 7.20287500  | -5.01212400 | 1.46665200  |
| H  | -2.66637700 | 3.20784300  | -1.78505400 | H | -2.98046900 | -4.13161600 | -5.40512100 |
| H  | -5.02493500 | 3.29422300  | 1.68085800  | H | -1.86462900 | -3.37656500 | -4.21531200 |
| H  | -2.25407300 | -5.09569000 | -4.09428900 | H | 3.90681500  | 0.28536300  | -5.42247000 |

|   |             |             |             |   |             |             |             |
|---|-------------|-------------|-------------|---|-------------|-------------|-------------|
| H | 5.23045300  | 0.60535700  | -4.29202700 | O | 0.63111200  | 3.04077400  | -2.56588400 |
| H | -3.99126200 | 3.99190100  | 3.93295800  | O | -1.02886200 | 1.50705900  | -2.72712000 |
| H | 1.00164100  | 5.65550000  | 3.24512600  | H | -0.89812400 | 1.41569300  | -1.64410000 |
| H | -0.62616700 | 6.86581300  | 4.52327600  | N | -0.83184800 | -0.31705600 | -0.62314900 |
| H | 0.48018500  | 3.08525000  | -5.12542100 | C | -0.34153100 | -1.55125900 | -0.98641700 |
| C | -2.02436200 | -4.50203300 | 7.60109600  | O | -1.02755600 | -2.39514000 | -1.58478000 |
| C | -0.70538900 | -4.52745600 | 6.81722000  | N | 0.95867300  | -1.81311800 | -0.67472800 |
| H | -0.38498300 | -5.56624500 | 6.67200700  | C | 1.86307500  | -0.70546100 | -0.42319900 |
| H | 0.08088900  | -4.03430800 | 7.40115800  | C | 1.24516200  | 0.24405100  | 0.63325200  |
| H | -2.35007400 | -3.47158300 | 7.77764300  | C | -0.25206400 | 0.67100100  | 0.39039400  |
| H | -2.81795700 | -5.00827200 | 7.04225600  | O | -1.05917700 | 0.54278100  | 1.49343800  |
| H | -1.92780000 | -4.99764200 | 8.57378200  | H | 2.75678000  | -1.13352800 | 0.04410900  |
| C | -0.88135000 | -3.83917300 | 5.48693400  | H | 1.82701200  | 1.16963600  | 0.58694300  |
| C | -0.65170300 | -2.46587400 | 5.34660900  | H | -1.85224900 | -0.35072500 | -0.58852500 |
| C | -1.42872000 | -4.52734500 | 4.39507100  | H | 1.33098700  | -2.60097300 | -1.20115700 |
| C | -0.95764800 | -1.79195000 | 4.16621900  | O | -0.47852800 | 1.93292900  | -0.20329600 |
| C | -1.73771500 | -3.87334400 | 3.20805900  | C | 1.45684800  | -0.33167300 | 2.03936600  |
| C | -1.50085500 | -2.49605900 | 3.08124500  | H | 2.52722700  | -0.47313500 | 2.22416400  |
| O | -1.82540500 | -1.90648000 | 1.91053000  | H | 1.05575800  | 0.33993400  | 2.79926600  |
| H | -0.23777600 | -1.90754600 | 6.18387100  | H | 0.97547000  | -1.30328400 | 2.15294400  |
| H | -1.62996700 | -5.59295400 | 4.48440600  | C | 2.30241000  | -0.06701900 | -1.74881200 |
| H | -0.77816700 | -0.72615900 | 4.07158800  | H | 1.45234400  | 0.36921600  | -2.27802100 |
| H | -2.17550300 | -4.40372700 | 2.36956400  | H | 3.05381400  | 0.70961200  | -1.59578000 |
| H | -1.48749000 | -0.96465500 | 1.83715600  | H | 2.73177700  | -0.84493400 | -2.38884400 |
| C | -0.12336500 | 2.30110000  | -3.22216000 |   |             |             |             |

**(5S,6S)-Me<sub>2</sub>DHU-INT2-II (SmDHPase)**

|   |              |             |             |   |             |             |             |
|---|--------------|-------------|-------------|---|-------------|-------------|-------------|
| C | 0.29556400   | -8.84682900 | -2.15073400 | C | -3.15272900 | 6.14624800  | 2.24894500  |
| C | 0.54059100   | -7.54135800 | -1.45661300 | C | 1.18590500  | -5.13518500 | 4.97263900  |
| N | 1.43747800   | -7.40675300 | -0.40568500 | N | 0.39587900  | -5.12522000 | 3.76252800  |
| C | 0.00800400   | -6.28545400 | -1.60953700 | C | 0.55487000  | -4.19194100 | 2.77524500  |
| C | 1.40817000   | -6.12613200 | 0.03397700  | O | 1.58901600  | -3.44622000 | 2.83997700  |
| N | 0.54994700   | -5.41523900 | -0.67717700 | O | -0.33535200 | -4.19562600 | 1.86361100  |
| C | -5.58383400  | -3.33767700 | -1.87104900 | C | 3.61572900  | -2.18583700 | 5.05551800  |
| C | -4.36090900  | -3.52886900 | -1.04986500 | C | 3.77496400  | -0.87707600 | 4.35740600  |
| N | -4.38780200  | -3.77862800 | 0.31118600  | N | 3.37480200  | -0.70624800 | 3.04109000  |
| C | -3.03518800  | -3.50403700 | -1.38401100 | C | 4.27011000  | 0.31300300  | 4.82277500  |
| C | -3.11399100  | -3.89139300 | 0.74877300  | C | 3.62058700  | 0.55776400  | 2.71936300  |
| N | -2.26582100  | -3.72433300 | -0.25671600 | N | 4.16778400  | 1.20359300  | 3.76972200  |
| C | -10.17813100 | -1.13245800 | -0.28943100 | C | 5.83743900  | -4.56414800 | -1.81687200 |
| C | -8.92864900  | -1.58172800 | 0.48337300  | C | 5.19652400  | -3.82966300 | -0.68086800 |
| C | -9.03977900  | -3.03516000 | 0.95168700  | N | 5.86040300  | -3.57231000 | 0.50981200  |
| S | -7.59950300  | -3.71654100 | 1.87762400  | C | 3.95180300  | -3.27408300 | -0.50581300 |
| C | -7.62312600  | -2.70007800 | 3.39733500  | C | 5.02416300  | -2.89340100 | 1.33332600  |
| C | -7.79575400  | 4.18744800  | 1.28533700  | N | 3.85589000  | -2.69923900 | 0.74921200  |
| C | -6.69762600  | 4.60122200  | 0.28760900  | C | 2.57829800  | 3.64967000  | -4.88477700 |
| C | -5.45056700  | 5.14582600  | 0.95517600  | C | 3.67077300  | 3.69539000  | -3.82733000 |
| C | -4.46903100  | 4.27815900  | 1.45731200  | O | 4.76110300  | 4.21234900  | -4.06636400 |
| C | -5.25521900  | 6.52478700  | 1.10943200  | N | 3.34427200  | 3.14600100  | -2.62228200 |
| C | -3.32943100  | 4.76707900  | 2.09760300  | C | 4.26823000  | 3.18171500  | -1.49836700 |
| C | -4.11900700  | 7.02355400  | 1.74975400  | C | 4.65294300  | 1.75779700  | -1.07877800 |

|    |              |             |             |   |              |             |             |
|----|--------------|-------------|-------------|---|--------------|-------------|-------------|
| O  | 3.79924100   | 1.00033900  | -0.57515900 | H | 5.29670200   | -2.55255600 | 2.31994400  |
| C  | 3.65369200   | 3.89890200  | -0.27284100 | H | 2.19951300   | 4.66824900  | -5.02280000 |
| O  | 3.49722500   | 5.28485200  | -0.45830100 | H | 4.34769500   | 3.77608800  | 0.57068000  |
| N  | 5.93455000   | 1.34535300  | -1.20254400 | H | 2.72091100   | 3.39477100  | 0.00252600  |
| C  | 7.10006000   | 2.07636500  | -1.76832700 | H | 2.74208000   | 5.45981000  | -1.04898900 |
| C  | 7.12141200   | 2.03758500  | -3.30007800 | H | 5.12832200   | 3.75641300  | -1.83924200 |
| C  | 8.28092100   | 1.32720900  | -1.12028400 | H | 2.45479500   | 2.65867400  | -2.50342700 |
| C  | 7.79450100   | -0.12886600 | -1.04967000 | H | 8.45686600   | 1.71294500  | -0.10963900 |
| C  | 6.30385900   | 0.00734200  | -0.70557700 | H | 9.20489200   | 1.44808100  | -1.69090600 |
| C  | 0.62308600   | -2.91318800 | -4.44541200 | H | 8.33746000   | -0.72245700 | -0.30849200 |
| C  | -4.51367000  | -1.52212300 | -5.56784300 | H | 7.92071200   | -0.61933200 | -2.02045100 |
| C  | -3.98222100  | -0.55565800 | -4.51283100 | H | 6.12383300   | -0.03603000 | 0.37565600  |
| S  | -5.00018400  | 0.98596700  | -4.48937600 | H | 5.67265200   | -0.75858700 | -1.16417100 |
| C  | -1.10311300  | 4.93575800  | -3.22104100 | H | 7.07696300   | 3.11607300  | -1.43216000 |
| C  | -1.56851000  | 3.61376100  | -3.80859800 | H | 0.20713200   | -2.08819600 | -5.03440500 |
| O  | -2.41996000  | 2.91090700  | -3.24147000 | H | 1.65396000   | -3.05058700 | -4.78008900 |
| C  | -0.90570800  | 4.83037900  | -1.69963000 | H | -2.94744600  | -0.28225800 | -4.73044400 |
| C  | -0.00110200  | 5.94303800  | -1.19229400 | H | -4.00029600  | -1.01338200 | -3.51918800 |
| O  | 1.09351800   | 6.15853200  | -1.71879200 | H | -4.06973100  | 1.77763800  | -3.90704000 |
| N  | -0.45462100  | 6.66178500  | -0.13934800 | H | -5.56108000  | -1.78185700 | -5.38106500 |
| N  | -1.00338300  | 3.25479600  | -4.98085900 | H | -1.86625200  | 4.80124300  | -1.17969200 |
| C  | -1.18194300  | 1.92753800  | -5.55338000 | H | -0.37409200  | 3.89893400  | -1.47872800 |
| Zn | 2.18174200   | -1.85223200 | 1.75823600  | H | 0.16423100   | 7.35102200  | 0.26243700  |
| Zn | -0.24068900  | -3.56536400 | -0.08719300 | H | -1.31391200  | 6.43763700  | 0.34209500  |
| H  | 1.21036100   | -9.24612500 | -2.60246800 | H | -0.16083200  | 5.25648100  | -3.67348100 |
| H  | -0.09755700  | -9.60147400 | -1.46070100 | H | -0.76938900  | 1.16567800  | -4.88303200 |
| H  | -0.73560000  | -5.95263100 | -2.31667900 | H | -2.24232300  | 1.72885900  | -5.72255600 |
| H  | 2.00100900   | -5.75962900 | 0.85802100  | H | -0.23861300  | 3.81693800  | -5.32136700 |
| H  | -6.15482600  | -2.45814900 | -1.55376400 | H | 0.91434600   | -4.33042500 | 5.66894900  |
| H  | -5.30900500  | -3.19443900 | -2.91794600 | H | 2.24234800   | -5.02676200 | 4.72335600  |
| H  | -2.57821700  | -3.32742200 | -2.34298100 | H | 3.90342000   | -2.10022200 | 6.10648900  |
| H  | -2.82420200  | -4.07676400 | 1.77026600  | H | 2.58171300   | -2.52973200 | 4.99622000  |
| H  | -8.78217200  | -0.92379400 | 1.34793500  | H | 4.66428600   | 0.59892300  | 5.78470200  |
| H  | -8.03783200  | -1.47012000 | -0.14618700 | H | 3.40355300   | 1.01761700  | 1.76599900  |
| H  | -9.92411400  | -3.17595100 | 1.58288000  | H | 4.38983400   | 2.18799600  | 3.79282100  |
| H  | -9.15035700  | -3.70957500 | 0.09594000  | H | -0.65991100  | 1.88721200  | -6.51075000 |
| H  | -6.86127000  | -3.10922200 | 4.06394400  | H | -1.85676300  | 5.69858700  | -3.45243300 |
| H  | -8.59569500  | -2.77880500 | 3.88883700  | H | 7.08660700   | 1.00714600  | -3.66916300 |
| H  | -7.39208000  | -1.65331900 | 3.19251800  | H | 6.28609200   | 2.59986500  | -3.72209300 |
| H  | -10.33792500 | -1.74796600 | -1.18119000 | H | 8.04509600   | 2.49925300  | -3.66544600 |
| H  | -7.10121300  | 5.35558100  | -0.39738700 | H | -0.43768500  | -8.70988700 | -2.94776100 |
| H  | -6.42966100  | 3.73554900  | -0.33027700 | H | -6.25218500  | -4.20444100 | -1.81638200 |
| H  | -4.60247400  | 3.20521300  | 1.34497100  | H | -5.23587900  | -3.80655500 | 0.87660500  |
| H  | -6.00067900  | 7.21535300  | 0.72279000  | H | 2.00672400   | -8.14504000 | -0.01818000 |
| H  | -2.58184100  | 4.08095300  | 2.48560800  | H | 6.13626000   | -5.57863900 | -1.52919800 |
| H  | -3.99234700  | 8.09660200  | 1.86357500  | H | 6.81213700   | -3.83203600 | 0.72447600  |
| H  | -2.27727100  | 6.52392100  | 2.76994900  | H | -11.07739600 | -1.20479900 | 0.33140200  |
| H  | -7.43600300  | 3.41038700  | 1.96792900  | H | -10.08008900 | -0.09296000 | -0.61518700 |
| H  | 6.72923400   | -4.04464300 | -2.18458800 | H | -8.67331200  | 3.79889400  | 0.75854800  |
| H  | 5.13478000   | -4.64457200 | -2.64855100 | H | -8.11466000  | 5.03941700  | 1.89398000  |
| H  | 3.13625100   | -3.21276300 | -1.20921400 | H | 3.02164500   | 3.33133300  | -5.83096700 |



|   |             |             |             |   |             |             |             |
|---|-------------|-------------|-------------|---|-------------|-------------|-------------|
| H | 1.75844900  | 2.98390200  | -4.60715200 | C | 0.57868600  | -2.53538000 | -3.00596300 |
| H | -4.45493700 | -1.08471600 | -6.56823800 | O | -0.28781100 | -2.97402800 | -2.24520600 |
| H | -3.93201600 | -2.45128200 | -5.56623200 | O | 1.52709400  | -1.68433700 | -2.69300500 |
| H | 4.23639100  | -2.96745900 | 4.60139800  | H | 1.31110200  | -1.13781600 | -1.86532400 |
| H | -0.48930400 | -5.60786100 | 3.75105700  | N | 0.90314100  | 0.15067100  | -0.76814800 |
| H | 1.04548500  | -6.09113800 | 5.48346200  | C | 0.17811900  | 1.08010800  | -1.51207800 |
| H | 0.03672700  | -3.81241700 | -4.63442600 | O | 0.72473700  | 1.75342400  | -2.40307400 |
| C | 1.07432100  | 5.63650400  | 6.83975800  | N | -1.15299100 | 1.14186600  | -1.26871100 |
| C | -0.16121800 | 5.56092800  | 5.92890900  | C | -1.71342100 | 0.79669100  | 0.03853500  |
| H | -0.45376200 | 6.57558500  | 5.63211100  | C | -1.16755100 | -0.57533500 | 0.45729400  |
| H | -1.00545900 | 5.14717100  | 6.49320600  | C | 0.38694300  | -0.64030800 | 0.40276300  |
| H | 1.37013200  | 4.63762700  | 7.17745100  | O | 1.00887400  | -0.20164100 | 1.53867800  |
| H | 1.92578700  | 6.07152600  | 6.30633300  | H | -1.39554800 | 1.54494700  | 0.78074800  |
| H | 0.88155500  | 6.25035800  | 7.72639500  | H | -1.53463200 | -1.28038000 | -0.29606500 |
| C | 0.10262300  | 4.71772300  | 4.70270500  | H | 1.87149900  | 0.46399600  | -0.63458800 |
| C | -0.14958600 | 3.34085600  | 4.70053400  | H | -1.65388700 | 1.81280900  | -1.84982200 |
| C | 0.70671200  | 5.26984400  | 3.56342200  | O | 0.83391300  | -1.98015800 | 0.20289500  |
| C | 0.18965900  | 2.53728400  | 3.61200200  | C | -1.67196300 | -0.98231300 | 1.84600000  |
| C | 1.05333400  | 4.48824900  | 2.46490900  | H | -2.75240000 | -1.15269700 | 1.83427200  |
| C | 0.79811700  | 3.10770600  | 2.48243600  | H | -1.18986600 | -1.89983500 | 2.18561900  |
| O | 1.15262200  | 2.37636900  | 1.39964000  | H | -1.45472200 | -0.20107400 | 2.57833500  |
| H | -0.61407100 | 2.88318800  | 5.57160400  | C | -3.23862300 | 0.83118900  | -0.07302800 |
| H | 0.92748200  | 6.33548700  | 3.54391000  | H | -3.59855800 | 0.03500500  | -0.73385000 |
| H | 0.00284900  | 1.46762100  | 3.62984400  | H | -3.70768300 | 0.71167300  | 0.90635800  |
| H | 1.53930800  | 4.92736200  | 1.59885200  | H | -3.56802200 | 1.78864800  | -0.48807400 |
| H | 1.05616200  | 1.38121600  | 1.55280500  |   |             |             |             |

**(5S,6S)-Me<sub>2</sub>DHU-TS3-II (*Sm*DHPase)**

|   |              |             |             |   |             |             |             |
|---|--------------|-------------|-------------|---|-------------|-------------|-------------|
| C | 0.22874700   | -8.85651200 | -2.21125200 | C | -4.12600800 | 7.11324200  | 1.69852000  |
| C | 0.37406600   | -7.61632400 | -1.39019300 | C | -3.17124300 | 6.24669700  | 2.23726500  |
| N | 0.77899900   | -7.65257300 | -0.06495600 | C | 1.09749600  | -5.18273000 | 4.93438100  |
| C | 0.14671500   | -6.28653200 | -1.64076800 | N | 0.33671500  | -5.13746000 | 3.70447200  |
| C | 0.76922000   | -6.39418800 | 0.43167600  | C | 0.47239200  | -4.11103200 | 2.79427600  |
| N | 0.39027600   | -5.53526300 | -0.50172900 | O | 1.48871800  | -3.35490400 | 2.92643700  |
| C | -5.60581200  | -3.29892900 | -1.95136900 | O | -0.41553000 | -4.06972900 | 1.88666500  |
| C | -4.38545400  | -3.45841600 | -1.11696800 | C | 3.55146800  | -2.25447000 | 5.04787400  |
| N | -4.42844700  | -3.63359900 | 0.25524600  | C | 3.76482800  | -0.94458500 | 4.36616700  |
| C | -3.05457100  | -3.47011000 | -1.43763800 | N | 3.36743900  | -0.73937600 | 3.05461700  |
| C | -3.16080600  | -3.74182900 | 0.71143600  | C | 4.30685900  | 0.21921500  | 4.84593200  |
| N | -2.30048800  | -3.64083800 | -0.29175300 | C | 3.65905700  | 0.51827100  | 2.74872500  |
| C | -10.19292900 | -1.06154900 | -0.39428300 | N | 4.23411300  | 1.12822100  | 3.80610900  |
| C | -8.94807300  | -1.49257100 | 0.39589000  | C | 5.80397600  | -4.62243300 | -1.81805900 |
| C | -9.05701900  | -2.93907600 | 0.88547000  | C | 5.15579400  | -3.90121000 | -0.67458100 |
| S | -7.62073400  | -3.59919500 | 1.83204700  | N | 5.79139300  | -3.73021600 | 0.54725500  |
| C | -7.66660800  | -2.56659000 | 3.34034500  | C | 3.93473000  | -3.28890100 | -0.51506400 |
| C | -7.77745200  | 4.23125400  | 1.22087600  | C | 4.96469500  | -3.04495700 | 1.37377400  |
| C | -6.67399300  | 4.65876900  | 0.23506800  | N | 3.82775400  | -2.76334000 | 0.76240500  |
| C | -5.44148600  | 5.21888600  | 0.91661400  | C | 2.63721700  | 3.63163600  | -4.87466400 |
| C | -4.47133300  | 4.36220800  | 1.45889100  | C | 3.72999500  | 3.69253200  | -3.81747800 |
| C | -5.24848000  | 6.60066500  | 1.04416400  | O | 4.81832600  | 4.21122100  | -4.05734800 |
| C | -3.34524700  | 4.86451000  | 2.11167200  | N | 3.40027100  | 3.15264700  | -2.60848100 |

|    |              |             |             |   |              |             |             |
|----|--------------|-------------|-------------|---|--------------|-------------|-------------|
| C  | 4.32522600   | 3.17547200  | -1.48505000 | H | 5.14047600   | -4.61118400 | -2.68484600 |
| C  | 4.66949600   | 1.74350600  | -1.05889500 | H | 3.14615100   | -3.15038300 | -1.23958100 |
| O  | 3.78983100   | 1.01368000  | -0.55671800 | H | 5.22380800   | -2.76119200 | 2.38185800  |
| C  | 3.73175400   | 3.91606500  | -0.26245700 | H | 2.25266100   | 4.64675800  | -5.02344800 |
| O  | 3.58932700   | 5.30050500  | -0.46601900 | H | 4.43385200   | 3.79340000  | 0.57459000  |
| N  | 5.93723100   | 1.29358200  | -1.17717200 | H | 2.79576300   | 3.42690000  | 0.02779400  |
| C  | 7.12660800   | 1.99585200  | -1.73118200 | H | 2.79787100   | 5.47651400  | -1.00508800 |
| C  | 7.15465500   | 1.97439300  | -3.26337300 | H | 5.19881400   | 3.72558100  | -1.83208400 |
| C  | 8.28232200   | 1.20444700  | -1.08762000 | H | 2.52357800   | 2.64376700  | -2.50509700 |
| C  | 7.75087000   | -0.23636300 | -1.03078200 | H | 8.46816300   | 1.57562700  | -0.07328000 |
| C  | 6.26620700   | -0.05708300 | -0.68330800 | H | 9.21059100   | 1.30212900  | -1.65565700 |
| C  | 0.62341800   | -2.91621000 | -4.47794700 | H | 8.27516300   | -0.85415400 | -0.29619800 |
| C  | -4.49292500  | -1.47689200 | -5.63232000 | H | 7.86016300   | -0.72095100 | -2.00648700 |
| C  | -3.84325700  | -0.63271700 | -4.54010500 | H | 6.08807600   | -0.09745800 | 0.39831800  |
| S  | -4.87466500  | 0.85843000  | -4.17159300 | H | 5.61064900   | -0.80155200 | -1.14220900 |
| C  | -0.91227300  | 4.93962300  | -3.23829200 | H | 7.13251100   | 3.03186700  | -1.38259400 |
| C  | -1.42680100  | 3.63130400  | -3.81683500 | H | 0.22542300   | -2.02623800 | -4.97771700 |
| O  | -2.28177700  | 2.94563000  | -3.23250800 | H | 1.62795300   | -3.07610200 | -4.87710300 |
| C  | -0.96733500  | 4.95716100  | -1.70545500 | H | -2.85472200  | -0.29479200 | -4.85735200 |
| C  | -0.03207100  | 6.01897500  | -1.14159800 | H | -3.71433700  | -1.21253600 | -3.62141700 |
| O  | 1.10881700   | 6.16315600  | -1.58551600 | H | -3.86002600  | 1.67462300  | -3.80420400 |
| N  | -0.51779500  | 6.77085400  | -0.12679500 | H | -5.50314000  | -1.79095800 | -5.34854000 |
| N  | -0.90576200  | 3.26516900  | -5.00646600 | H | -1.99211300  | 5.07267200  | -1.34456000 |
| C  | -1.13237000  | 1.94430000  | -5.57842200 | H | -0.59277000  | 4.00336300  | -1.31805600 |
| Zn | 2.17961700   | -1.86360900 | 1.76441200  | H | 0.11537500   | 7.41386100  | 0.32611800  |
| Zn | -0.26101600  | -3.57366800 | -0.14018900 | H | -1.41394500  | 6.58839400  | 0.30285700  |
| H  | 1.17485600   | -9.40259700 | -2.29859100 | H | 0.12124800   | 5.11602100  | -3.54940800 |
| H  | -0.51443300  | -9.53801400 | -1.78240200 | H | -0.71812300  | 1.16923000  | -4.92494800 |
| H  | -0.18815700  | -5.81500900 | -2.55104000 | H | -2.20166800  | 1.77190900  | -5.71697400 |
| H  | 1.00390700   | -6.16486800 | 1.45897200  | H | -0.13687300  | 3.80937800  | -5.36683300 |
| H  | -6.14523200  | -2.37527400 | -1.71360600 | H | 0.79606800   | -4.41166700 | 5.65608600  |
| H  | -5.33099000  | -3.25814100 | -3.00733200 | H | 2.15633100   | -5.04551200 | 4.71323100  |
| H  | -2.58189900  | -3.36226500 | -2.40008700 | H | 3.88044200   | -2.20349600 | 6.08908300  |
| H  | -2.88515300  | -3.87976300 | 1.74418900  | H | 2.49796500   | -2.53640600 | 5.01900000  |
| H  | -8.81200100  | -0.82087500 | 1.25153000  | H | 4.71525400   | 0.47638500  | 5.81004000  |
| H  | -8.05234300  | -1.38688900 | -0.22760500 | H | 3.45772200   | 0.99676400  | 1.80086500  |
| H  | -9.94583200  | -3.07455100 | 1.51156900  | H | 4.49890600   | 2.10153200  | 3.84153100  |
| H  | -9.15771200  | -3.62674000 | 0.03908200  | H | -0.64095700  | 1.89642300  | -6.55137100 |
| H  | -6.90629200  | -2.96112300 | 4.01743700  | H | -1.51650500  | 5.75942400  | -3.64764300 |
| H  | -8.64242900  | -2.64957000 | 3.82465200  | H | 7.09501600   | 0.94978600  | -3.64499200 |
| H  | -7.44414000  | -1.51979500 | 3.12629400  | H | 6.33649500   | 2.56214500  | -3.68460700 |
| H  | -10.34186800 | -1.69177800 | -1.27759800 | H | 8.09202700   | 2.41620500  | -3.61808600 |
| H  | -7.07915600  | 5.40798600  | -0.45453100 | H | -0.10027900  | -8.59946300 | -3.22004900 |
| H  | -6.38869000  | 3.79608300  | -0.37938300 | H | -6.30062700  | -4.13578000 | -1.81926200 |
| H  | -4.60336000  | 3.28720600  | 1.36734800  | H | -5.28236100  | -3.63099400 | 0.81316700  |
| H  | -5.98517600  | 7.28272900  | 0.62691400  | H | 1.02552500   | -8.48265600 | 0.45393100  |
| H  | -2.60519100  | 4.18674800  | 2.52782600  | H | 6.01602700   | -5.66866900 | -1.57016700 |
| H  | -4.00228300  | 8.18851300  | 1.79326100  | H | 6.71809700   | -4.05479700 | 0.78182000  |
| H  | -2.30634100  | 6.63559000  | 2.76746400  | H | -11.09728900 | -1.12868800 | 0.21971700  |
| H  | -7.41552000  | 3.45890200  | 1.90759600  | H | -10.09718300 | -0.02680900 | -0.73557200 |
| H  | 6.74677000   | -4.14881300 | -2.11326100 | H | -8.64392300  | 3.83123700  | 0.68448800  |

H -8.11394900 5.07925200 1.82552000  
H 3.08417800 3.30926100 -5.81789900  
H 1.82349100 2.96039700 -4.59405800  
H -4.57288200 -0.91641600 -6.56748700  
H -3.90228900 -2.38067300 -5.82146700  
H 4.10830000 -3.06263000 4.55969100  
H -0.57681600 -5.56739900 3.69599700  
H 0.96387100 -6.16166500 5.40184000  
H -0.01788600 -3.76769300 -4.71033500  
C 1.06305900 5.58152100 6.84686200  
C -0.14584200 5.55912600 5.89783900  
H -0.39939500 6.58685600 5.61077300  
H -1.01831700 5.16157700 6.43020300  
H 1.32009300 4.56853900 7.17396600  
H 1.94242800 6.00165000 6.34782100  
H 0.86020800 6.18401900 7.73893800  
C 0.12665400 4.72999700 4.66355300  
C -0.11110000 3.35021200 4.65321500  
C 0.71944900 5.29557300 3.52526300  
C 0.22981500 2.55804200 3.55742200  
C 1.06669200 4.52497700 2.41841900  
H 1.91970700 0.43277800 -0.64645500  
H -1.53291400 1.88669000 -1.87932300  
O 0.80933500 -1.98980500 0.24905700  
C -1.65763300 -0.89568300 1.81842700  
H -2.74365900 -1.02372000 1.80231800  
H -1.21117100 -1.83220800 2.15255200  
H -1.41349400 -0.12370000 2.55214800

C 0.82382100 3.14279900 2.42750800  
O 1.17331200 2.41925300 1.33572500  
H -0.56577400 2.88153300 5.52362100  
H 0.93070300 6.36316800 3.51240000  
H 0.05576400 1.48625700 3.56963400  
H 1.54720800 4.97410700 1.55436100  
H 1.09650100 1.42259200 1.49342900  
C 0.68148200 -2.64336900 -3.00643000  
O -0.16788500 -3.15664000 -2.24598200  
O 1.63619000 -1.84036100 -2.67901600  
H 1.32614700 -1.02020700 -1.76706100  
N 0.97314200 0.07126600 -0.84389900  
C 0.25974900 1.05355900 -1.59898200  
O 0.81966500 1.63084500 -2.53766700  
N -1.03170500 1.23143500 -1.27764000  
C -1.60978800 0.89074400 0.02510600  
C -1.13230100 -0.50778100 0.43173500  
C 0.41537500 -0.64675900 0.38926500  
O 1.05731600 -0.15629700 1.48529800  
H -1.25493800 1.61722100 0.76921400  
H -1.53276600 -1.19393900 -0.32301700  
C -3.13084700 1.00327200 -0.09158300  
H -3.52907400 0.24828000 -0.77764900  
H -3.60633100 0.87738800 0.88359700  
H -3.41151700 1.98804100 -0.47679300

**(5S,6S)-Me2DHU-EP-II (SmDHPase)**

C 2.59463400 8.22468100 -2.96527900  
C 2.16480300 7.26360400 -1.92532200  
N 2.01363400 7.56189600 -0.57966300  
C 1.87858600 5.93586900 -2.02564600  
C 1.66400600 6.42807900 0.07591300  
N 1.57201900 5.42548600 -0.78175800  
C 6.45259700 1.19713500 -2.11326000  
C 5.36342900 1.77695100 -1.28572300  
N 5.39359500 1.84106500 0.09703900  
C 4.16152000 2.32110800 -1.64550500  
C 4.24025100 2.40486100 0.52222400  
N 3.46692400 2.70154900 -0.51323500  
C 10.16208700 -2.18175600 -0.29807500  
C 8.93574600 -1.49817200 0.32325400  
C 9.33352500 -0.38720300 1.29826100  
S 7.95286100 0.52095400 2.11261800  
C 7.22540700 -0.78409100 3.16691100  
C 6.27214000 -6.30516700 1.78106900  
C 5.76002200 -4.89186200 2.10399500  
C 4.27610200 -4.74058900 1.84673000  
C 3.35045000 -4.72391900 2.89791300

C 3.79251300 -4.66133400 0.53340100  
C 1.97932300 -4.63061600 2.64808000  
C 2.42507500 -4.57614700 0.27419000  
C 1.51358200 -4.55782700 1.33449800  
C 0.77066100 5.67826700 4.48457300  
N 1.44218500 5.13152800 3.31091300  
C 0.88418500 4.20360600 2.45251600  
O -0.38230400 4.01516500 2.57537500  
O 1.64448100 3.66424700 1.60300400  
C -2.45914700 3.66633800 4.84517100  
C -3.12169900 2.44071800 4.30453800  
N -2.89337500 1.99888400 3.00671700  
C -4.00114900 1.57912000 4.90438700  
C -3.62189000 0.90046500 2.82699600  
N -4.30459800 0.62009400 3.95510100  
C -4.00079000 5.95773000 -2.23967100  
C -3.69970300 5.08785800 -1.06457700  
N -4.56555300 4.93465600 0.00947900  
C -2.61420800 4.30770600 -0.75944700  
C -4.00136900 4.09752300 0.90697800  
N -2.81355100 3.69845100 0.46905200

|    |             |             |             |   |             |             |             |
|----|-------------|-------------|-------------|---|-------------|-------------|-------------|
| C  | -3.56623400 | -3.11728800 | -4.46587700 | H | 2.07816400  | -4.52442400 | -0.75408800 |
| C  | -4.74955100 | -2.78543500 | -3.57372400 | H | 0.44856900  | -4.46189100 | 1.14183100  |
| O  | -5.90626900 | -2.76663000 | -3.99195300 | H | 5.76017100  | -7.05345700 | 2.39395400  |
| N  | -4.41970500 | -2.52591600 | -2.27233100 | H | -4.93723500 | 5.67087200  | -2.73114700 |
| C  | -5.42866400 | -2.43973700 | -1.22880700 | H | -3.19441900 | 5.85775900  | -2.96887200 |
| C  | -5.47375800 | -1.03724400 | -0.59608600 | H | -1.72980200 | 4.13374200  | -1.36143200 |
| O  | -4.51048700 | -0.63351000 | 0.08777600  | H | -4.46125400 | 3.80749500  | 1.83816300  |
| C  | -5.08985800 | -3.45863900 | -0.11578400 | H | -3.21765800 | -4.12427900 | -4.21938400 |
| O  | -5.09077500 | -4.79222100 | -0.59076300 | H | -5.84890200 | -3.40434100 | 0.67306000  |
| N  | -6.58039000 | -0.27390900 | -0.71578400 | H | -4.12337200 | -3.17324400 | 0.31731300  |
| C  | -7.72214100 | -0.43588000 | -1.65213600 | H | -4.50316800 | -4.86013800 | -1.37260600 |
| C  | -7.33056800 | -0.01319800 | -3.07148500 | H | -6.38054600 | -2.70408500 | -1.69027500 |
| C  | -8.78023000 | 0.47433100  | -1.00397000 | H | -3.44977200 | -2.66066600 | -1.96025300 |
| C  | -7.95866200 | 1.65854500  | -0.46632300 | H | -9.26763000 | -0.05377400 | -0.17688600 |
| C  | -6.64183600 | 1.01390300  | 0.00122800  | H | -9.55464400 | 0.77444500  | -1.71391800 |
| C  | 0.36112900  | 2.50614700  | -4.66549300 | H | -8.46497100 | 2.19295300  | 0.34205000  |
| C  | 4.77035500  | -0.53219500 | -5.61857900 | H | -7.76571700 | 2.37964800  | -1.26674800 |
| C  | 3.90188200  | -0.96561500 | -4.44253500 | H | -6.63428400 | 0.82052800  | 1.08084400  |
| S  | 4.32784500  | -2.69009300 | -3.92064600 | H | -5.75731300 | 1.61867600  | -0.22143600 |
| C  | -0.28883500 | -5.91019900 | -3.31348300 | H | -8.05389800 | -1.47655500 | -1.65827700 |
| C  | 0.29190300  | -4.52497200 | -3.59063800 | H | -0.27478900 | 3.06496600  | -5.35469800 |
| O  | 1.08136900  | -3.96184600 | -2.81857400 | H | 1.36386300  | 2.38897400  | -5.08230000 |
| C  | -0.64354800 | -6.18079700 | -1.84969000 | H | 2.84842400  | -0.93783700 | -4.72604700 |
| C  | -2.10096400 | -5.88175100 | -1.50097800 | H | 4.03369400  | -0.29254200 | -3.59145000 |
| O  | -2.93139200 | -5.53634300 | -2.34719200 | H | 3.14383400  | -3.00433800 | -3.34878400 |
| N  | -2.44349100 | -6.09983600 | -0.20884400 | H | 5.83621200  | -0.57882500 | -5.37126800 |
| N  | -0.03065500 | -3.99395800 | -4.79217900 | H | -0.46489900 | -7.23639200 | -1.61464100 |
| C  | 0.52571400  | -2.73903300 | -5.28143500 | H | 0.01127900  | -5.60363700 | -1.19063900 |
| Zn | -1.50608500 | 2.71801300  | 1.65785800  | H | -3.38532900 | -5.83705800 | 0.07084600  |
| Zn | 1.56054500  | 3.41324200  | -0.64153000 | H | -1.73979000 | -6.24392200 | 0.49781800  |
| H  | 1.91411800  | 9.08011600  | -3.05197400 | H | -1.16686900 | -6.09420800 | -3.93838300 |
| H  | 3.59847500  | 8.62103200  | -2.77155100 | H | 0.13802500  | -1.88260600 | -4.72117000 |
| H  | 1.88878500  | 5.30266300  | -2.89537200 | H | 1.61397500  | -2.76002300 | -5.20211900 |
| H  | 1.50701800  | 6.37196000  | 1.14253900  | H | -0.73751000 | -4.45567600 | -5.34353200 |
| H  | 6.55941600  | 0.11847200  | -1.95083000 | H | 0.74614800  | 4.97607800  | 5.32813300  |
| H  | 6.23216700  | 1.35257000  | -3.17135400 | H | -0.25449200 | 5.93852100  | 4.22111200  |
| H  | 3.72803600  | 2.45605500  | -2.62319600 | H | -2.77530900 | 3.84483700  | 5.87602800  |
| H  | 3.98096600  | 2.57880400  | 1.55450400  | H | -1.37285500 | 3.56855600  | 4.81937200  |
| H  | 8.32818000  | -2.24859600 | 0.84249100  | H | -4.42210800 | 1.56209300  | 5.89676000  |
| H  | 8.30154000  | -1.07653100 | -0.46523700 | H | -3.68848600 | 0.30056800  | 1.92740500  |
| H  | 9.97775300  | -0.77588300 | 2.09456700  | H | -4.89011800 | -0.19152200 | 4.08687000  |
| H  | 9.90182700  | 0.39452300  | 0.78321200  | H | 0.25173000  | -2.62353200 | -6.33144000 |
| H  | 6.44295400  | -0.31009000 | 3.76300200  | H | 0.49071900  | -6.61461200 | -3.62871600 |
| H  | 7.98338300  | -1.18696600 | 3.84282700  | H | -6.91878900 | 1.00126700  | -3.08436500 |
| H  | 6.78373300  | -1.58947500 | 2.57754700  | H | -6.60537200 | -0.70818500 | -3.49619400 |
| H  | 10.77989200 | -1.46659100 | -0.85179900 | H | -8.21353100 | -0.03003000 | -3.71967500 |
| H  | 6.31479400  | -4.16534000 | 1.49423800  | H | 2.61798300  | 7.72384400  | -3.93493300 |
| H  | 5.97883000  | -4.65481500 | 3.15189300  | H | 7.42105000  | 1.66423400  | -1.90253800 |
| H  | 3.70803300  | -4.78472300 | 3.92342000  | H | 6.14465600  | 1.47929100  | 0.68869300  |
| H  | 4.49530700  | -4.66900500 | -0.29700500 | H | 2.14262700  | 8.46789600  | -0.15380100 |
| H  | 1.27571400  | -4.60730400 | 3.47519500  | H | -4.07850200 | 7.01387200  | -1.95694300 |

H -5.46970500 5.37285700 0.10786000  
H 10.79282700 -2.64237200 0.46955600  
H 9.85675000 -2.96810500 -0.99437700  
H 7.34751200 -6.38915900 1.97012700  
H 6.09278000 -6.55814000 0.73164400  
H -3.88822900 -3.07083500 -5.50659400  
H -2.73677200 -2.42445300 -4.29478900  
H 4.60328300 -1.17114900 -6.48987300  
H 4.53611100 0.50029700 -5.89993500  
H -2.71271700 4.55139200 4.25271200  
H 2.45183300 5.11314200 3.31621100  
H 1.29337400 6.58325800 4.80335400  
H -0.07383100 1.50835200 -4.54507700  
C -2.45606200 -4.35102900 7.40507500  
C -1.23590800 -4.70314000 6.54125500  
H -1.24022500 -5.77617200 6.31702600  
H -0.31644300 -4.50239300 7.10406100  
H -2.45706300 -3.28614000 7.65978500  
H -3.38618600 -4.56490100 6.86875700  
H -2.46641500 -4.92204300 8.34004800  
C -1.25924800 -3.89917100 5.26525600  
C -0.74102100 -2.59960800 5.23036400  
C -1.93281200 -4.37002400 4.12934800  
C -0.91394100 -1.77822000 4.11871800  
C -2.10893800 -3.56778300 3.00647100  
C -1.61505400 -2.25797500 3.00560800  
O -1.85818400 -1.49524900 1.90834000  
H -0.20957800 -2.21443200 6.09784700  
H -2.33902000 -5.37913400 4.13322000

H -0.51468000 -0.76802800 4.10892200  
H -2.62171500 -3.92826200 2.12074400  
H -1.32282200 -0.67731600 1.92364400  
C 0.39734800 3.19642400 -3.30433100  
O 1.48448500 3.02055300 -2.61840600  
O -0.58040800 3.85573000 -2.92709400  
N -1.82688700 -0.62319700 -1.10062300  
C -1.20246400 -1.83508100 -1.00688800  
O -1.84358500 -2.89646800 -1.11168800  
N 0.15480000 -1.89646500 -0.81219300  
C 1.16070300 -0.84430100 -0.94291000  
C 1.34044800 0.05549700 0.33238400  
C 0.23433500 1.06250300 0.59743100  
O -0.56985800 0.90862500 1.57431500  
H 2.10338500 -1.40046500 -0.96868200  
H 2.20659200 0.67625200 0.08701400  
H -2.80088800 -0.62459000 -0.80071700  
H 0.49226500 -2.81800200 -1.06351400  
O 0.08784700 2.09218600 -0.14107900  
H -1.32450500 0.23819400 -0.96902600  
C 1.67204200 -0.78937000 1.56578500  
H 2.58782300 -1.36078400 1.39034000  
H 1.82213400 -0.15941700 2.44677700  
H 0.88006200 -1.50586200 1.78118300  
C 1.06498600 -0.08805900 -2.26949400  
H 0.12973600 0.45860700 -2.38521100  
H 1.87140600 0.63610600 -2.37992900  
H 1.12771200 -0.82138100 -3.07551300

**(5S,6R)-Me<sub>2</sub>DHU-ES-II (*Sm*DHPase)**

C 1.10234900 8.66194000 -2.62608900  
C 0.91388200 7.57274000 -1.63028000  
N 0.73752500 7.79539000 -0.27237500  
C 0.88858200 6.21201700 -1.76589800  
C 0.62358100 6.59756400 0.35272300  
N 0.71021300 5.61860200 -0.53125000  
C 6.09521100 2.37981700 -1.84992800  
C 4.88286400 2.64709700 -1.02781500  
N 4.89433700 2.69609500 0.35763600  
C 3.58162900 2.88788300 -1.37906200  
C 3.63698300 2.95630600 0.78890700  
N 2.81674600 3.07486700 -0.24298200  
C 10.28219500 -0.36928400 -0.01043200  
C 10.27086300 1.15140600 0.15703400  
C 9.63933500 1.65931600 1.45817400  
S 7.84030100 1.29713200 1.66114100  
C 7.84066900 -0.22296700 2.67605200  
C 7.10964700 -5.17082900 1.81636300  
C 6.12553600 -4.04700400 2.17783900

C 4.68995100 -4.41444300 1.87161100  
C 3.80147500 -4.79001700 2.88715400  
C 4.22957700 -4.42385100 0.54742600  
C 2.49120100 -5.16915800 2.59098200  
C 2.92225100 -4.80354600 0.24187400  
C 2.04935100 -5.18045900 1.26696200  
C -0.46013900 5.58411100 4.68124000  
N 0.40163400 5.23207300 3.56515100  
C 0.14049000 4.15382500 2.73674700  
O -1.00924300 3.60929700 2.87617400  
O 1.03861200 3.83645300 1.90696300  
C -1.92830000 -4.87384000 7.24625100  
C -0.71697200 -5.12387900 6.33780000  
C -0.94376400 -4.41468100 5.02799700  
C -1.43312300 -5.08752700 3.90211900  
C -0.85393200 -3.01872200 4.97940800  
C -1.84730600 -4.39564400 2.76551600  
C -1.27827700 -2.30763000 3.86428600  
C -1.78693700 -2.99967700 2.75878500

|    |             |             |             |   |             |             |             |
|----|-------------|-------------|-------------|---|-------------|-------------|-------------|
| O  | -2.24464100 | -2.34121300 | 1.65655200  | H | 6.56472100  | 1.42726000  | -1.58299900 |
| C  | -3.30090200 | 3.03417100  | 4.87471200  | H | 5.82229600  | 2.34195700  | -2.90659000 |
| C  | -3.76295600 | 1.82804600  | 4.12451600  | H | 3.12418200  | 2.94197500  | -2.35387000 |
| N  | -3.29633500 | 1.49215400  | 2.85838200  | H | 3.34514800  | 3.06331900  | 1.82157600  |
| C  | -4.68639100 | 0.89140400  | 4.51250000  | H | 9.75429800  | 1.61262700  | -0.69322000 |
| C  | -3.93715300 | 0.38905700  | 2.49314200  | H | 11.30141100 | 1.53095200  | 0.13181500  |
| N  | -4.78556100 | -0.00483400 | 3.46689900  | H | 10.14935600 | 1.25173600  | 2.33740300  |
| C  | -5.01768300 | 5.26801800  | -2.18820300 | H | 9.72035900  | 2.74843500  | 1.51762100  |
| C  | -4.56268900 | 4.60110800  | -0.94232500 | H | 6.79520300  | -0.47406900 | 2.86689700  |
| N  | -5.26936200 | 4.62574300  | 0.25057200  | H | 8.34192400  | -0.04868700 | 3.63081700  |
| C  | -3.44147000 | 3.86355900  | -0.67691200 | H | 8.31331000  | -1.05355000 | 2.14972900  |
| C  | -4.57085800 | 3.91761800  | 1.17213800  | H | 10.80419500 | -0.85865400 | 0.81981400  |
| N  | -3.45924100 | 3.44291100  | 0.63871400  | H | 6.39866000  | -3.14051300 | 1.62197700  |
| C  | -2.95376100 | -3.51399400 | -4.66153400 | H | 6.22350300  | -3.80405300 | 3.24239200  |
| C  | -4.13068900 | -3.39427400 | -3.71166200 | H | 4.13959800  | -4.78369800 | 3.92066800  |
| O  | -5.26638100 | -3.70681000 | -4.05985900 | H | 4.90248400  | -4.13031400 | -0.25527800 |
| N  | -3.81756600 | -2.93453900 | -2.46557700 | H | 1.80944200  | -5.44148200 | 3.39102300  |
| C  | -4.83716000 | -2.75992900 | -1.44491200 | H | 2.59326400  | -4.77085600 | -0.79310300 |
| C  | -4.89023900 | -1.28737500 | -1.03237900 | H | 1.02720100  | -5.47336100 | 1.04622300  |
| O  | -3.88320500 | -0.73665600 | -0.53302600 | H | 6.88399000  | -6.08278300 | 2.37775000  |
| C  | -4.58017300 | -3.65273600 | -0.20624000 | H | -0.58393300 | -6.19972500 | 6.17766400  |
| O  | -4.71558900 | -5.01608700 | -0.51332700 | H | 0.19457300  | -4.75963400 | 6.82786600  |
| N  | -6.03976900 | -0.60077900 | -1.17310000 | H | -1.51838700 | -6.17141300 | 3.92383300  |
| C  | -7.31722500 | -1.07206700 | -1.77729800 | H | -0.47642400 | -2.47713000 | 5.84384800  |
| C  | -7.23690700 | -1.15540800 | -3.30443100 | H | -2.23524500 | -4.91867900 | 1.89649500  |
| C  | -8.31165900 | -0.00594300 | -1.27615600 | H | -1.22792100 | -1.22272800 | 3.84298900  |
| C  | -7.47950800 | 1.28585800  | -1.24728300 | H | -2.04052900 | -1.39136700 | 1.74079000  |
| C  | -6.10544000 | 0.81327500  | -0.75479300 | H | -2.84596100 | -5.23843100 | 6.77407300  |
| C  | 0.05798600  | 2.74368200  | -4.55221900 | H | -5.99639000 | 4.90175200  | -2.51987500 |
| C  | -0.15613000 | 2.78634700  | -3.04187700 | H | -4.30172400 | 5.06869300  | -2.98780500 |
| O  | 0.82413200  | 3.25019500  | -2.35352500 | H | -2.64841600 | 3.58460700  | -1.35602300 |
| O  | -1.25100000 | 2.39009100  | -2.58125000 | H | -4.90220800 | 3.76427000  | 2.18744200  |
| C  | 4.83713000  | 0.50805900  | -5.45846700 | H | -2.75345400 | -4.57926400 | -4.82448000 |
| C  | 4.06016400  | -0.30520300 | -4.43129200 | H | -5.33857500 | -3.40233700 | 0.55062800  |
| S  | 4.85103600  | -1.96285400 | -4.21291300 | H | -3.60500900 | -3.40202100 | 0.21971500  |
| C  | 0.39643000  | -5.48605200 | -3.15280100 | H | -3.84833900 | -5.37229000 | -0.77232400 |
| C  | 1.05623200  | -4.20865000 | -3.65925600 | H | -5.76773500 | -3.09398400 | -1.89970200 |
| O  | 1.95293500  | -3.65586400 | -3.00009800 | H | -2.87725400 | -2.58618300 | -2.28764300 |
| C  | -0.40776300 | -5.18824400 | -1.86938400 | H | -8.65063400 | -0.25717500 | -0.26452300 |
| C  | -1.04741000 | -6.38794000 | -1.18337900 | H | -9.19373500 | 0.06055400  | -1.91735400 |
| O  | -2.21688300 | -6.37547200 | -0.80439900 | H | -7.90768700 | 2.05485000  | -0.59847300 |
| N  | -0.25360800 | -7.47496700 | -0.98360600 | H | -7.39902500 | 1.70941300  | -2.25350700 |
| N  | 0.61299000  | -3.71413900 | -4.83026300 | H | -6.02421100 | 0.87495100  | 0.33745900  |
| C  | 1.03177200  | -2.40793900 | -5.32811600 | H | -5.26495900 | 1.37255700  | -1.17265800 |
| Zn | -1.88862400 | 2.40683700  | 1.57466900  | H | -7.57117500 | -2.05398700 | -1.36847700 |
| Zn | 0.83115800  | 3.58348900  | -0.26157700 | H | -0.73696300 | 2.17858900  | -5.04027700 |
| O  | -0.70162700 | 2.45126500  | 0.04483800  | H | 0.06446400  | 3.76445400  | -4.95051400 |
| H  | 0.24620400  | 9.34599600  | -2.65747300 | H | 3.02949100  | -0.44722600 | -4.76263300 |
| H  | 1.99702000  | 9.25942700  | -2.41562200 | H | 4.03476300  | 0.21714700  | -3.47096500 |
| H  | 0.99576200  | 5.60521100  | -2.65075400 | H | 3.79080500  | -2.59277700 | -3.65919000 |
| H  | 0.48723900  | 6.47891900  | 1.41817400  | H | 5.88101200  | 0.64230900  | -5.15608500 |

|   |             |             |             |   |             |             |             |
|---|-------------|-------------|-------------|---|-------------|-------------|-------------|
| H | 0.25191000  | -4.69320000 | -1.14811200 | H | -2.05722100 | -3.80422400 | 7.43819000  |
| H | -1.21374200 | -4.48781800 | -2.08388700 | H | -3.24543300 | -3.08971700 | -5.62551600 |
| H | -0.63719100 | -8.24124600 | -0.44954200 | H | -2.05625100 | -3.01879400 | -4.28879700 |
| H | 0.74243400  | -7.44843200 | -1.13241600 | H | 4.83433200  | 0.01834300  | -6.43610600 |
| H | -0.25115400 | -5.93533600 | -3.91292200 | H | 4.38976900  | 1.50153400  | -5.57281800 |
| H | 0.72986200  | -1.61936100 | -4.63257500 | H | -3.56752300 | 3.95994300  | 4.35353800  |
| H | 2.11477400  | -2.38887700 | -5.46411000 | H | 1.38301200  | 5.45951100  | 3.63680600  |
| H | -0.17917800 | -4.15995300 | -5.26713300 | H | -0.15709700 | 6.55992900  | 5.06934900  |
| H | -0.41989700 | 4.85684200  | 5.50297200  | H | 1.03167500  | 2.30366000  | -4.78643700 |
| H | -1.49216200 | 5.65001700  | 4.33584900  | N | -0.97900700 | -0.64281600 | -0.55967600 |
| H | -3.75885700 | 3.05867300  | 5.86680100  | C | -0.29747300 | -1.39351300 | -1.53359200 |
| H | -2.21483400 | 3.03875300  | 4.97857800  | O | -0.94157200 | -2.05556300 | -2.35423400 |
| H | -5.25810600 | 0.78682200  | 5.42065000  | N | 1.04364700  | -1.35276400 | -1.45845300 |
| H | -3.83795800 | -0.11979300 | 1.54381800  | C | 1.76344200  | -0.35372400 | -0.65830500 |
| H | -5.34148100 | -0.84693200 | 3.44727700  | C | 1.08345100  | -0.20869400 | 0.72013000  |
| H | 0.55305200  | -2.23487300 | -6.29279800 | C | -0.42342000 | -0.15544700 | 0.57696800  |
| H | 1.20700900  | -6.19606100 | -2.95710500 | O | -1.16004300 | 0.21703600  | 1.51555300  |
| H | -6.94571400 | -0.19153800 | -3.73499600 | H | 1.36377600  | 0.76215800  | 1.13937600  |
| H | -6.53307100 | -1.91969500 | -3.63844100 | H | -2.00598000 | -0.68347300 | -0.61909900 |
| H | -8.22106000 | -1.42092100 | -3.70567600 | H | 1.53702400  | -1.99662800 | -2.07556300 |
| H | 1.21886800  | 8.23169300  | -3.62271500 | C | 1.44771900  | -1.31180600 | 1.73476400  |
| H | 6.85070200  | 3.16505300  | -1.72922000 | H | 2.51096000  | -1.26809700 | 1.97901900  |
| H | 5.70657600  | 2.52513800  | 0.94159200  | H | 0.88469900  | -1.17892400 | 2.65862200  |
| H | 0.70465200  | 8.69720300  | 0.17968400  | H | 1.23460600  | -2.31059000 | 1.34581100  |
| H | -5.09475600 | 6.35559400  | -2.07092200 | H | 1.68090400  | 0.61592000  | -1.16589400 |
| H | -6.14830500 | 5.09553800  | 0.41096400  | H | -1.06008300 | 2.30405900  | -0.86200200 |
| H | 9.26504400  | -0.77045300 | -0.05962400 | C | 3.23768100  | -0.73841900 | -0.57254500 |
| H | 10.79307000 | -0.65361400 | -0.93495900 | H | 3.69065800  | -0.76524800 | -1.56632700 |
| H | 8.14116000  | -4.88052100 | 2.04214300  | H | 3.78383700  | -0.00276700 | 0.02355400  |
| H | 7.05385600  | -5.41525300 | 0.75109000  | H | 3.36772000  | -1.72391200 | -0.11988600 |
| H | -1.82165800 | -5.37859200 | 8.21328300  |   |             |             |             |

**(5S,6R)-Me<sub>2</sub>DHU-TS1-II (*Sm*DHPase)**

|   |             |             |             |   |             |             |            |
|---|-------------|-------------|-------------|---|-------------|-------------|------------|
| C | 0.89108000  | 8.66446300  | -2.49732500 | C | 6.44403400  | -3.92799900 | 1.92426600 |
| C | 0.67872400  | 7.53150500  | -1.55305400 | C | 4.96615800  | -4.17725600 | 1.71950000 |
| N | 0.46939700  | 7.69989800  | -0.19208600 | C | 4.12430100  | -4.49035600 | 2.79429200 |
| C | 0.66841000  | 6.17587500  | -1.73926600 | C | 4.41680700  | -4.14356100 | 0.43063900 |
| C | 0.35506600  | 6.48011400  | 0.38589700  | C | 2.77087400  | -4.76310200 | 2.59001200 |
| N | 0.46967000  | 5.53224500  | -0.53052600 | C | 3.06531500  | -4.41640900 | 0.21676400 |
| C | 6.03867500  | 2.48172600  | -1.97557200 | C | 2.23806600  | -4.72809100 | 1.30032800 |
| C | 4.85233600  | 2.76950400  | -1.12698300 | C | -0.44390300 | 5.38310800  | 4.76642000 |
| N | 4.88170100  | 2.75634100  | 0.25735600  | N | 0.35028700  | 5.05093300  | 3.59002000 |
| C | 3.55362700  | 3.04747600  | -1.45668600 | C | 0.03988000  | 4.03829800  | 2.70160800 |
| C | 3.63387200  | 3.01346400  | 0.71164700  | O | -1.12135600 | 3.51695100  | 2.80485400 |
| N | 2.80313300  | 3.18952700  | -0.30576600 | O | 0.92231800  | 3.75433300  | 1.83567100 |
| C | 10.32482600 | -0.21292600 | -0.29038300 | C | -3.22213600 | 2.76513600  | 4.95934200 |
| C | 8.99459600  | 0.19645300  | 0.35749100  | C | -3.69412100 | 1.52242700  | 4.28390700 |
| C | 9.18049700  | 1.31903500  | 1.38157400  | N | -3.34437100 | 1.22973400  | 2.97505300 |
| S | 7.65722100  | 1.91416400  | 2.22903100  | C | -4.47883000 | 0.50749000  | 4.76704000 |
| C | 7.19239500  | 0.45037800  | 3.22227300  | C | -3.90719400 | 0.06637800  | 2.67313700 |
| C | 7.30059600  | -5.12677000 | 1.48873900  | N | -4.60370400 | -0.39984200 | 3.73190300 |

|    |             |             |             |   |             |             |             |
|----|-------------|-------------|-------------|---|-------------|-------------|-------------|
| C  | -5.14069400 | 5.12237800  | -2.01093200 | H | 6.34433100  | 0.74591100  | 3.84328800  |
| C  | -4.63254600 | 4.39338800  | -0.81941900 | H | 8.01934400  | 0.16164200  | 3.87525900  |
| N  | -5.29747800 | 4.35031300  | 0.39652500  | H | 6.89761600  | -0.39406600 | 2.59682200  |
| C  | -3.49770800 | 3.65220300  | -0.62984900 | H | 10.78897600 | 0.62954900  | -0.81438600 |
| C  | -4.56656100 | 3.60418400  | 1.25778200  | H | 6.75116100  | -3.04240800 | 1.35133700  |
| N  | -3.46820400 | 3.16673400  | 0.66414600  | H | 6.63788400  | -3.70336500 | 2.97963300  |
| C  | -2.93501900 | -3.55047400 | -4.73444500 | H | 4.53356500  | -4.51838700 | 3.80149400  |
| C  | -4.07372000 | -3.43969400 | -3.73229700 | H | 5.05268700  | -3.89572800 | -0.41637800 |
| O  | -5.20686100 | -3.81852500 | -4.02037600 | H | 2.12515200  | -4.98788700 | 3.43356200  |
| N  | -3.73523100 | -2.91580000 | -2.51757700 | H | 2.66987200  | -4.34748600 | -0.79327100 |
| C  | -4.71293200 | -2.81189200 | -1.44539700 | H | 1.18020600  | -4.92502100 | 1.15646900  |
| C  | -4.86615300 | -1.35438700 | -1.00183400 | H | 7.03850700  | -6.02103700 | 2.06261300  |
| O  | -3.90076200 | -0.73847300 | -0.50201300 | H | -6.12762100 | 4.76264100  | -2.32403400 |
| C  | -4.33665100 | -3.68160200 | -0.22019200 | H | -4.45438900 | 4.97506000  | -2.84690600 |
| O  | -4.43442600 | -5.05194900 | -0.50909900 | H | -2.73113400 | 3.40706900  | -1.35148800 |
| N  | -6.07252000 | -0.75892500 | -1.09496100 | H | -4.86259300 | 3.39386200  | 2.27321000  |
| C  | -7.31564500 | -1.30385000 | -1.70348100 | H | -2.68662700 | -4.61163700 | -4.85009600 |
| C  | -7.23945400 | -1.32245700 | -3.23185800 | H | -5.05621200 | -3.45352600 | 0.58150400  |
| C  | -8.38411300 | -0.33927200 | -1.15242300 | H | -3.34858400 | -3.38273100 | 0.14266000  |
| C  | -7.65490800 | 1.01136200  | -1.07731700 | H | -3.55823300 | -5.39756100 | -0.75320800 |
| C  | -6.24036800 | 0.62787200  | -0.62196900 | H | -5.63808700 | -3.21390500 | -1.85437800 |
| C  | -0.17668700 | 2.73009400  | -4.55257100 | H | -2.80515700 | -2.51714300 | -2.37996000 |
| C  | -0.28617900 | 2.79158200  | -3.03832800 | H | -8.69061400 | -0.65639700 | -0.14903800 |
| O  | 0.72206200  | 3.24410600  | -2.39008500 | H | -9.27644500 | -0.31607800 | -1.78254500 |
| O  | -1.34534800 | 2.36180300  | -2.51524200 | H | -8.13357400 | 1.71642300  | -0.39193500 |
| C  | 4.74501000  | 0.66590600  | -5.60007600 | H | -7.62265800 | 1.48115600  | -2.06568700 |
| C  | 3.99700600  | -0.15893800 | -4.56259100 | H | -6.14247500 | 0.65458900  | 0.47081800  |
| S  | 4.85147200  | -1.77859700 | -4.30888800 | H | -5.45301800 | 1.26536800  | -1.03175100 |
| C  | 0.51137900  | -5.30023400 | -3.09784900 | H | -7.49034500 | -2.31753100 | -1.33244000 |
| C  | 1.11265100  | -4.02956400 | -3.68259000 | H | -1.15857700 | 2.86977900  | -5.00807800 |
| O  | 1.99491200  | -3.40635500 | -3.06853700 | H | 0.53345300  | 3.46561300  | -4.93604500 |
| C  | -0.24968700 | -4.97836900 | -1.79383600 | H | 2.97431900  | -0.34920800 | -4.89349200 |
| C  | -0.74348500 | -6.19793100 | -1.02947100 | H | 3.94537600  | 0.38013700  | -3.61289300 |
| O  | -1.92719400 | -6.35979600 | -0.73753300 | H | 3.80976600  | -2.43323800 | -3.74753800 |
| N  | 0.20183900  | -7.11456200 | -0.67975700 | H | 5.78070200  | 0.84919600  | -5.29506600 |
| N  | 0.64268500  | -3.62490000 | -4.87788400 | H | 0.40527000  | -4.39312700 | -1.14005300 |
| C  | 1.00946200  | -2.33849600 | -5.45856600 | H | -1.11850800 | -4.35681000 | -2.00595500 |
| Zn | -1.96912800 | 2.15102600  | 1.64048700  | H | -0.09370100 | -7.87486800 | -0.08415200 |
| Zn | 0.79456400  | 3.50663700  | -0.28376200 | H | 1.18566300  | -6.89299100 | -0.70449300 |
| H  | 0.03688700  | 9.35106600  | -2.51648500 | H | -0.15318000 | -5.79888600 | -3.81106800 |
| H  | 1.78223400  | 9.24803400  | -2.23934300 | H | 0.69181100  | -1.52137500 | -4.80347300 |
| H  | 0.80523500  | 5.60702700  | -2.64444500 | H | 2.08939700  | -2.29074300 | -5.61282200 |
| H  | 0.21159800  | 6.32723500  | 1.44541400  | H | -0.14060400 | -4.12142500 | -5.27401700 |
| H  | 6.37054700  | 1.44223000  | -1.87213900 | H | -0.31816100 | 4.66248700  | 5.58491300  |
| H  | 5.79038300  | 2.64694300  | -3.02611700 | H | -1.49832200 | 5.40938400  | 4.49095500  |
| H  | 3.09021100  | 3.13595600  | -2.42614600 | H | -3.60365600 | 2.81278700  | 5.98276300  |
| H  | 3.35279900  | 3.06728300  | 1.75144500  | H | -2.13189500 | 2.80588400  | 4.98466200  |
| H  | 8.54358800  | -0.67740900 | 0.84220300  | H | -4.93808400 | 0.35224000  | 5.73011400  |
| H  | 8.28746600  | 0.52397800  | -0.41357300 | H | -3.83119600 | -0.44539900 | 1.72307300  |
| H  | 9.89042000  | 1.02455000  | 2.16226200  | H | -5.07664200 | -1.29072900 | 3.76947200  |
| H  | 9.58842600  | 2.21560000  | 0.90300200  | H | 0.51149600  | -2.23829200 | -6.42388000 |



|   |             |             |             |   |             |             |             |
|---|-------------|-------------|-------------|---|-------------|-------------|-------------|
| H | 1.34541200  | -5.98239500 | -2.90330300 | C | -1.05631800 | -2.32432500 | 3.82721200  |
| H | -7.01220100 | -0.32636600 | -3.62634100 | C | -1.56029800 | -4.36814300 | 2.62402000  |
| H | -6.49050500 | -2.02884200 | -3.59372200 | C | -1.50856500 | -2.96955500 | 2.66802900  |
| H | -8.20548800 | -1.63627700 | -3.64249600 | O | -1.91058700 | -2.28086000 | 1.56879300  |
| H | 1.02886200  | 8.27847000  | -3.50917000 | H | -0.30634800 | -2.57100900 | 5.82057900  |
| H | 6.88702700  | 3.12936300  | -1.72809300 | H | -1.22676100 | -6.18950400 | 3.70585900  |
| H | 5.70024600  | 2.53775400  | 0.82961400  | H | -1.02556000 | -1.23912800 | 3.85822500  |
| H | 0.41881300  | 8.58353200  | 0.29341600  | H | -1.92266800 | -4.86082000 | 1.72682500  |
| H | -5.22284100 | 6.20064100  | -1.83013700 | H | -1.68235000 | -1.32552900 | 1.64883700  |
| H | -6.17876500 | 4.79510900  | 0.60753600  | O | -0.59839200 | 2.06528900  | -0.05357300 |
| H | 11.03825800 | -0.57279900 | 0.45858600  | N | -1.01379200 | -0.37224400 | -0.70299100 |
| H | 10.17229100 | -1.01526200 | -1.01799200 | C | -0.33917500 | -1.12345900 | -1.65186600 |
| H | 8.36691200  | -4.92774600 | 1.63895600  | O | -0.96019300 | -1.86911200 | -2.42718700 |
| H | 7.14587500  | -5.35580400 | 0.42985800  | N | 1.00752400  | -1.01562000 | -1.65482200 |
| H | -3.29127000 | -3.19250800 | -5.70323600 | C | 1.74868400  | -0.04802700 | -0.84256600 |
| H | -2.04945800 | -2.99128300 | -4.42657400 | C | 1.06943700  | 0.10783100  | 0.53438600  |
| H | 4.76922000  | 0.15849100  | -6.56841100 | C | -0.44006300 | 0.30653700  | 0.37389200  |
| H | 4.25819400  | 1.63789700  | -5.73638100 | O | -1.17345700 | 0.32527900  | 1.45750200  |
| H | -3.55613600 | 3.66408300  | 4.43046900  | H | 1.44937200  | 1.01689500  | 1.00690800  |
| H | 1.33427100  | 5.27726900  | 3.61062800  | H | -2.02814800 | -0.51936600 | -0.67859400 |
| H | -0.14822900 | 6.37153100  | 5.12623100  | H | 1.49422700  | -1.69536300 | -2.23456300 |
| H | 0.17928500  | 1.73324800  | -4.83623400 | C | 1.33130200  | -1.07221500 | 1.48381100  |
| C | -1.67242400 | -5.23441000 | 7.06574200  | H | 2.39747100  | -1.16294100 | 1.70052400  |
| C | -0.43330300 | -5.26367500 | 6.16180900  | H | 0.81047100  | -0.91923700 | 2.42763300  |
| H | -0.17670000 | -6.30092900 | 5.91741300  | H | 0.99665900  | -2.02152200 | 1.06038800  |
| H | 0.42520200  | -4.84463200 | 6.70121700  | H | 1.70922600  | 0.92558800  | -1.34563700 |
| H | -1.92959800 | -4.20613900 | 7.33975300  | H | -1.00076000 | 2.08521100  | -0.97900200 |
| H | -2.53716700 | -5.66565100 | 6.55140800  | C | 3.20890800  | -0.48693200 | -0.74499100 |
| H | -1.51246700 | -5.79972300 | 7.99081500  | H | 3.68019400  | -0.49936800 | -1.73005800 |
| C | -0.70274600 | -4.47809100 | 4.90313900  | H | 3.77102500  | 0.20426600  | -0.11198700 |
| C | -0.65153100 | -3.07950000 | 4.92284900  | H | 3.29526700  | -1.49061900 | -0.32411700 |
| C | -1.16267100 | -5.10423400 | 3.73749400  |   |             |             |             |

**(5S,6R)-Me<sub>2</sub>DHU-INT-II (*SmDHPase*)**

|   |             |            |             |   |             |             |            |
|---|-------------|------------|-------------|---|-------------|-------------|------------|
| C | 0.66103800  | 8.62272800 | -2.67564500 | C | 7.43568900  | -4.88710900 | 1.65529500 |
| C | 0.45824400  | 7.50477400 | -1.71271800 | C | 6.55968000  | -3.66141700 | 1.96037900 |
| N | 0.20835900  | 7.69255100 | -0.36133300 | C | 5.08574800  | -3.94606900 | 1.77023000 |
| C | 0.49692500  | 6.14675400 | -1.87196800 | C | 4.24982800  | -4.21337100 | 2.86161400 |
| C | 0.11924500  | 6.48146200 | 0.23821900  | C | 4.53527100  | -3.99636900 | 0.48221100 |
| N | 0.28811200  | 5.51995700 | -0.65593600 | C | 2.90245800  | -4.52722400 | 2.67384000 |
| C | 5.98256900  | 2.60661600 | -1.98003500 | C | 3.19066300  | -4.31293000 | 0.28607400 |
| C | 4.78773100  | 2.89079200 | -1.14415900 | C | 2.37015200  | -4.58211300 | 1.38494100 |
| N | 4.80479300  | 2.89843700 | 0.24024800  | C | -0.64217300 | 5.45646300  | 4.64472800 |
| C | 3.48877000  | 3.14314500 | -1.49024000 | N | 0.14193900  | 5.10230100  | 3.46556500 |
| C | 3.54946400  | 3.14031700 | 0.67951600  | C | -0.17268300 | 4.08779300  | 2.58061500 |
| N | 2.72579500  | 3.28866900 | -0.34838900 | O | -1.33953300 | 3.57977200  | 2.66707000 |
| C | 10.33054300 | 0.07531600 | -0.20246100 | O | 0.71986500  | 3.79281700  | 1.72572200 |
| C | 8.97230100  | 0.44443900 | 0.41060700  | C | -3.34418000 | 2.76240500  | 4.87003300 |
| C | 9.10215100  | 1.55292900 | 1.45823900  | C | -3.77975600 | 1.46286700  | 4.28589700 |
| S | 7.54097700  | 2.10590700 | 2.26448700  | N | -3.46573000 | 1.13738100  | 2.97733000 |
| C | 7.06959100  | 0.61713100 | 3.21706300  | C | -4.47626000 | 0.42157900  | 4.84052800 |

|    |             |             |             |   |             |             |             |
|----|-------------|-------------|-------------|---|-------------|-------------|-------------|
| C  | -3.95850900 | -0.07274000 | 2.74160400  | H | 9.79094000  | 1.25872100  | 2.25773800  |
| N  | -4.58072600 | -0.53444800 | 3.84623100  | H | 9.50869000  | 2.46475000  | 1.00805700  |
| C  | -5.26855400 | 4.91546500  | -2.16440100 | H | 6.19588800  | 0.88668200  | 3.81384500  |
| C  | -4.77157600 | 4.20440400  | -0.95577800 | H | 7.87957600  | 0.33243300  | 3.89264400  |
| N  | -5.47847100 | 4.13662400  | 0.23504300  | H | 6.81132100  | -0.22123600 | 2.56801400  |
| C  | -3.61527700 | 3.50926300  | -0.72142000 | H | 10.79226500 | 0.93672500  | -0.69703000 |
| C  | -4.75155700 | 3.42333700  | 1.12578400  | H | 6.86317200  | -2.83422700 | 1.30414200  |
| N  | -3.61410800 | 3.03007000  | 0.57549800  | H | 6.74218500  | -3.33094700 | 2.99001300  |
| C  | -2.78565700 | -3.74383000 | -4.68485700 | H | 4.65898300  | -4.17435300 | 3.86876000  |
| C  | -3.93916500 | -3.59042700 | -3.70632800 | H | 5.16626300  | -3.78307300 | -0.37806900 |
| O  | -5.04999800 | -4.05364400 | -3.95921500 | H | 2.26191400  | -4.71661600 | 3.52994300  |
| N  | -3.63771300 | -2.91788900 | -2.56069400 | H | 2.79121800  | -4.31831300 | -0.72398300 |
| C  | -4.54255800 | -2.94343400 | -1.42405300 | H | 1.31936200  | -4.82017000 | 1.24898100  |
| C  | -4.83424900 | -1.51564900 | -0.94952300 | H | 7.17707100  | -5.72278700 | 2.31295100  |
| O  | -3.93986300 | -0.83481000 | -0.40718500 | H | -6.22885200 | 4.51619800  | -2.51020500 |
| C  | -3.95200900 | -3.77286100 | -0.26690700 | H | -4.54952800 | 4.79814200  | -2.97728600 |
| O  | -3.79740600 | -5.09995800 | -0.71394200 | H | -2.81537600 | 3.29003500  | -1.41395200 |
| N  | -6.07681700 | -1.00653900 | -1.09409200 | H | -5.07663400 | 3.20201800  | 2.13000800  |
| C  | -7.26333600 | -1.63152000 | -1.73738300 | H | -2.49741400 | -4.80112800 | -4.69799400 |
| C  | -7.16673500 | -1.61257500 | -3.26573600 | H | -4.65078100 | -3.71622500 | 0.58813100  |
| C  | -8.41165300 | -0.76545200 | -1.18284500 | H | -3.01079700 | -3.32024400 | 0.05926300  |
| C  | -7.79250100 | 0.63709000  | -1.07507000 | H | -2.96936300 | -5.46384300 | -0.35321800 |
| C  | -6.35632600 | 0.35813400  | -0.61117300 | H | -5.44361200 | -3.44553800 | -1.77531300 |
| C  | -0.21411900 | 2.61770100  | -4.61334400 | H | -2.68740500 | -2.56777900 | -2.41108500 |
| C  | -0.32930800 | 2.72347000  | -3.10717200 | H | -8.70206900 | -1.12414500 | -0.18870800 |
| O  | 0.65048900  | 3.22843200  | -2.46017400 | H | -9.29634700 | -0.80106700 | -1.82313400 |
| O  | -1.37798900 | 2.26596700  | -2.57729900 | H | -8.33230000 | 1.28868100  | -0.38206700 |
| C  | 4.77506700  | 0.67789300  | -5.57583600 | H | -7.78956600 | 1.12701100  | -2.05418100 |
| C  | 4.03502400  | -0.15304700 | -4.53692700 | H | -6.26842600 | 0.38119400  | 0.48257300  |
| S  | 4.90885600  | -1.76120500 | -4.27891800 | H | -5.61701200 | 1.05918000  | -1.00755400 |
| C  | 0.71786600  | -5.42125600 | -3.04886500 | H | -7.36371100 | -2.66409300 | -1.39209900 |
| C  | 1.25399400  | -4.10901600 | -3.61293100 | H | -1.18678100 | 2.79119100  | -5.07783300 |
| O  | 2.09837000  | -3.45160200 | -2.98564600 | H | 0.53091300  | 3.30794600  | -5.01329200 |
| C  | -0.13471300 | -5.18469100 | -1.78910600 | H | 3.01459400  | -0.35564800 | -4.86796300 |
| C  | -0.50991500 | -6.39479200 | -0.94452300 | H | 3.97696400  | 0.38642600  | -3.58796400 |
| O  | -1.32794500 | -6.28843200 | -0.02636200 | H | 3.88815100  | -2.41516800 | -3.67918400 |
| N  | 0.09030100  | -7.58084100 | -1.20534100 | H | 5.80768200  | 0.87500700  | -5.26905100 |
| N  | 0.78837300  | -3.72531200 | -4.81791400 | H | 0.38914900  | -4.49278000 | -1.12225400 |
| C  | 1.12796400  | -2.43162400 | -5.40169100 | H | -1.07367000 | -4.68498000 | -2.03986300 |
| Zn | -2.16842200 | 2.07931500  | 1.65743000  | H | -0.15043300 | -8.36631100 | -0.61893700 |
| Zn | 0.71735500  | 3.52303200  | -0.35856400 | H | 0.78620200  | -7.70458100 | -1.92090000 |
| H  | -0.21232400 | 9.28262600  | -2.73191500 | H | 0.15161900  | -5.97855100 | -3.80325600 |
| H  | 1.52733900  | 9.23842600  | -2.40797400 | H | 0.80815800  | -1.62151600 | -4.73925900 |
| H  | 0.67560600  | 5.56718300  | -2.76264400 | H | 2.20504300  | -2.36623600 | -5.57059700 |
| H  | -0.04377700 | 6.34561300  | 1.29709200  | H | 0.03150900  | -4.25087200 | -5.22753000 |
| H  | 6.33206200  | 1.57589300  | -1.85154200 | H | -0.48763700 | 4.76487800  | 5.48286500  |
| H  | 5.73666500  | 2.74395000  | -3.03510600 | H | -1.70050900 | 5.45141800  | 4.38345700  |
| H  | 3.03497700  | 3.20626600  | -2.46601900 | H | -3.69541800 | 2.85823900  | 5.90103200  |
| H  | 3.25814800  | 3.19621900  | 1.71641800  | H | -2.25659700 | 2.85056100  | 4.85922800  |
| H  | 8.52600600  | -0.44730400 | 0.86601900  | H | -4.88699500 | 0.27602700  | 5.82664300  |
| H  | 8.28227000  | 0.77033200  | -0.37654200 | H | -3.87002400 | -0.61932200 | 1.81171000  |

|   |             |             |             |   |             |             |             |
|---|-------------|-------------|-------------|---|-------------|-------------|-------------|
| H | -4.98282000 | -1.45528300 | 3.94204500  | C | -0.84666600 | -4.80422400 | 3.96212000  |
| H | 0.61369400  | -2.33774700 | -6.35906700 | C | -1.06423700 | -2.03013100 | 3.98907200  |
| H | 1.61245200  | -6.00484800 | -2.80118000 | C | -1.25094200 | -4.13857900 | 2.80941600  |
| H | -6.99566900 | -0.59692100 | -3.63785400 | C | -1.36909800 | -2.74251500 | 2.82063100  |
| H | -6.37022000 | -2.26653900 | -3.62475000 | O | -1.78736500 | -2.13212700 | 1.68338500  |
| H | -8.10558200 | -1.97846400 | -3.69576300 | H | -0.42106500 | -2.15496600 | 6.03314500  |
| H | 0.83676900  | 8.21946600  | -3.67477000 | H | -0.77291300 | -5.88944600 | 3.94746900  |
| H | 6.81825700  | 3.27437400  | -1.74302200 | H | -1.14568200 | -0.94698100 | 3.99285900  |
| H | 5.62060100  | 2.69634000  | 0.82366700  | H | -1.46470200 | -4.68400400 | 1.89577800  |
| H | 0.11633500  | 8.58323500  | 0.10496800  | H | -1.57403900 | -1.16281100 | 1.68448600  |
| H | -5.39996100 | 5.98881800  | -1.98414000 | O | -0.59255600 | 1.93743400  | -0.21708300 |
| H | -6.38588000 | 4.54275300  | 0.41029700  | N | -1.00319600 | -0.34742500 | -0.75566600 |
| H | 11.02817900 | -0.28321600 | 0.56187100  | C | -0.30720000 | -1.17597500 | -1.59906000 |
| H | 10.21775800 | -0.71687700 | -0.94821900 | O | -0.88472300 | -2.02740800 | -2.30439800 |
| H | 8.49816700  | -4.66082000 | 1.79516500  | N | 1.04065200  | -1.02124800 | -1.63207600 |
| H | 7.29426100  | -5.22242000 | 0.62319000  | C | 1.76516700  | -0.00924000 | -0.86452200 |
| H | -3.13687200 | -3.48965600 | -5.68801100 | C | 1.06139300  | 0.22082300  | 0.49029700  |
| H | -1.92482700 | -3.12866000 | -4.41533600 | C | -0.44229400 | 0.50736900  | 0.26587200  |
| H | 4.80767800  | 0.16803600  | -6.54272200 | O | -1.18634300 | 0.45118700  | 1.39569100  |
| H | 4.27628600  | 1.64319800  | -5.71677100 | H | 1.46907400  | 1.13398300  | 0.93442300  |
| H | -3.73408000 | 3.61199700  | 4.29977800  | H | -2.00131500 | -0.55151600 | -0.67586300 |
| H | 1.12641300  | 5.32737100  | 3.47747300  | H | 1.54009700  | -1.74415300 | -2.14254800 |
| H | -0.36255800 | 6.46200800  | 4.96786400  | C | 1.27821100  | -0.92541300 | 1.48329900  |
| H | 0.08869000  | 1.59550000  | -4.86554000 | H | 2.33828200  | -1.03530300 | 1.72186600  |
| C | -1.57982000 | -5.14210600 | 7.15849500  | H | 0.74817000  | -0.72416100 | 2.41276400  |
| C | -0.26418200 | -4.85253000 | 6.42434900  | H | 0.92635200  | -1.88203900 | 1.09233100  |
| H | 0.25529200  | -5.79537400 | 6.21549100  | H | 1.73657300  | 0.93633000  | -1.42219500 |
| H | 0.39789700  | -4.26446500 | 7.07149500  | H | -1.00307600 | 1.95330500  | -1.16310300 |
| H | -2.10333700 | -4.21036300 | 7.39703000  | C | 3.22646400  | -0.43499200 | -0.72121200 |
| H | -2.24714400 | -5.74546300 | 6.53484400  | H | 3.71067800  | -0.50492300 | -1.69816300 |
| H | -1.41089400 | -5.68430700 | 8.09586700  | H | 3.77870700  | 0.29472700  | -0.12316400 |
| C | -0.54311500 | -4.11017300 | 5.14166500  | H | 3.31180200  | -1.41170600 | -0.24100500 |
| C | -0.65066400 | -2.71566800 | 5.12927100  |   |             |             |             |

**(5S,6R)-Me<sub>2</sub>DHU-TS2-II (*SmDHPase*)**

|   |             |             |             |   |             |             |            |
|---|-------------|-------------|-------------|---|-------------|-------------|------------|
| C | 0.94226800  | 8.64370800  | -2.54285900 | S | 7.67690500  | 1.91188000  | 2.17699900 |
| C | 0.71460100  | 7.47800400  | -1.63135300 | C | 7.17789800  | 0.46293900  | 3.17574100 |
| N | 0.50775800  | 7.63087800  | -0.26839000 | C | 7.26481300  | -5.17116700 | 1.49979500 |
| C | 0.68275200  | 6.12029700  | -1.82899000 | C | 6.42574900  | -3.95872400 | 1.93121100 |
| C | 0.37559400  | 6.40814500  | 0.29707000  | C | 4.94298500  | -4.19178000 | 1.74261200 |
| N | 0.47374200  | 5.46343700  | -0.62572900 | C | 4.10508400  | -4.47375200 | 2.82913400 |
| C | 6.04849100  | 2.42857500  | -1.99982800 | C | 4.38372500  | -4.17153700 | 0.45785700 |
| C | 4.85841400  | 2.74254300  | -1.16637000 | C | 2.74554600  | -4.72677200 | 2.64059400 |
| N | 4.89052900  | 2.77255700  | 0.21687000  | C | 3.02598700  | -4.42499900 | 0.26016600 |
| C | 3.55729700  | 3.00692300  | -1.50096100 | C | 2.20200600  | -4.70329300 | 1.35508600 |
| C | 3.64325700  | 3.03995300  | 0.66560700  | C | -0.40171300 | 5.40744000  | 4.73943100 |
| N | 2.80859600  | 3.18195100  | -0.35411200 | N | 0.39858200  | 5.12796600  | 3.56234600 |
| C | 10.31924200 | -0.28696000 | -0.30907700 | C | 0.10689400  | 4.10254700  | 2.68341800 |
| C | 8.99191400  | 0.16201400  | 0.31871200  | O | -1.03639900 | 3.55286500  | 2.80464700 |
| C | 9.19389000  | 1.28182900  | 1.34291000  | O | 0.99802200  | 3.85635300  | 1.81347600 |

|    |             |             |             |   |             |             |             |
|----|-------------|-------------|-------------|---|-------------|-------------|-------------|
| C  | -3.19739100 | 2.80950400  | 4.95031600  | H | 8.30583600  | 0.50772600  | -0.46334400 |
| C  | -3.65744800 | 1.54547800  | 4.30949700  | H | 9.88976500  | 0.97235000  | 2.13045300  |
| N  | -3.32638700 | 1.25429700  | 2.99768600  | H | 9.62639300  | 2.16822600  | 0.86706500  |
| C  | -4.39650000 | 0.50900300  | 4.81768200  | H | 6.33492300  | 0.77946700  | 3.79329500  |
| C  | -3.85141600 | 0.06909700  | 2.71503800  | H | 7.99695800  | 0.15959700  | 3.83200200  |
| N  | -4.51101600 | -0.41064800 | 3.79122500  | H | 6.86634500  | -0.37788400 | 2.55351500  |
| C  | -5.11263700 | 5.14537700  | -2.02805400 | H | 10.81661100 | 0.54124700  | -0.82533200 |
| C  | -4.57160400 | 4.42692600  | -0.83745900 | H | 6.73784800  | -3.08243000 | 1.34671300  |
| N  | -5.21123600 | 4.44493500  | 0.39301300  | H | 6.63193000  | -3.72555400 | 2.98235100  |
| C  | -3.45311600 | 3.65553200  | -0.63933500 | H | 4.52217200  | -4.49134300 | 3.83334800  |
| C  | -4.48620600 | 3.70755500  | 1.26656700  | H | 5.01638700  | -3.94848200 | -0.39845700 |
| N  | -3.41334500 | 3.21626800  | 0.67183200  | H | 2.10296300  | -4.92638900 | 3.49278900  |
| C  | -2.97123500 | -3.55568000 | -4.71261100 | H | 2.62370400  | -4.36696800 | -0.74776700 |
| C  | -4.10485900 | -3.43689300 | -3.70368500 | H | 1.13894400  | -4.88068400 | 1.22473300  |
| O  | -5.24047500 | -3.81046800 | -3.98812100 | H | 6.99817700  | -6.05683100 | 2.08484000  |
| N  | -3.75931000 | -2.91247000 | -2.49180200 | H | -6.12014900 | 4.80193400  | -2.28859700 |
| C  | -4.73230100 | -2.77668200 | -1.41821300 | H | -4.46843900 | 4.96660500  | -2.89110600 |
| C  | -4.85676200 | -1.30649300 | -1.00609000 | H | -2.70041400 | 3.35070200  | -1.35243200 |
| O  | -3.87568100 | -0.69562500 | -0.53568300 | H | -4.77063800 | 3.54077800  | 2.29349600  |
| C  | -4.35664500 | -3.62354100 | -0.17719900 | H | -2.74030500 | -4.61910700 | -4.84102600 |
| O  | -4.46827700 | -5.00007800 | -0.43195900 | H | -5.07101700 | -3.37335700 | 0.62202800  |
| N  | -6.05695900 | -0.69580000 | -1.10156100 | H | -3.36436700 | -3.32279200 | 0.17372200  |
| C  | -7.31377100 | -1.23698500 | -1.68409700 | H | -3.60641900 | -5.35509400 | -0.71097500 |
| C  | -7.25758800 | -1.29090600 | -3.21329400 | H | -5.66495100 | -3.17432800 | -1.81393300 |
| C  | -8.36349500 | -0.24686200 | -1.14186400 | H | -2.83161000 | -2.51281800 | -2.35366200 |
| C  | -7.61561300 | 1.09505800  | -1.10029700 | H | -8.66383300 | -0.54002300 | -0.12942300 |
| C  | -6.20122700 | 0.70134400  | -0.65302500 | H | -9.26194500 | -0.22377800 | -1.76334000 |
| C  | -0.16976300 | 2.70670900  | -4.56680300 | H | -8.07738200 | 1.81941700  | -0.42349800 |
| C  | 4.73579200  | 0.60378500  | -5.61296100 | H | -7.58822800 | 1.54545100  | -2.09795600 |
| C  | 3.95107500  | -0.20793000 | -4.59233000 | H | -6.08922500 | 0.74782500  | 0.43771900  |
| S  | 4.77250200  | -1.84023600 | -4.31295600 | H | -5.41107100 | 1.32159300  | -1.08328000 |
| C  | 0.43778200  | -5.30399400 | -3.05201800 | H | -7.49795700 | -2.23988800 | -1.28899900 |
| C  | 1.05177400  | -4.04309300 | -3.64331100 | H | 0.07064300  | 1.72284400  | -4.98442000 |
| O  | 1.93859700  | -3.42227900 | -3.03208300 | H | -1.12411500 | 3.00765400  | -5.00605700 |
| C  | -0.29526300 | -4.97786000 | -1.73275500 | H | 2.93471700  | -0.38398200 | -4.94977100 |
| C  | -0.80499300 | -6.20107700 | -0.98477500 | H | 3.88253600  | 0.33248500  | -3.64407600 |
| O  | -1.99803000 | -6.37960700 | -0.74756500 | H | 3.69235400  | -2.48376000 | -3.81384600 |
| N  | 0.13883400  | -7.10487000 | -0.59752100 | H | 5.76744100  | 0.76950600  | -5.28507100 |
| N  | 0.59050900  | -3.64297400 | -4.84400500 | H | 0.38115700  | -4.41519100 | -1.08186300 |
| C  | 0.98009000  | -2.37428200 | -5.44984100 | H | -1.15406100 | -4.33726700 | -1.92582900 |
| Zn | -1.94278500 | 2.15386400  | 1.69057900  | H | -0.17064600 | -7.86803100 | -0.01254400 |
| Zn | 0.78344500  | 3.42255500  | -0.23367100 | H | 1.11784300  | -6.86187900 | -0.56982900 |
| H  | 0.09547500  | 9.33915200  | -2.53516100 | H | -0.24817500 | -5.78721100 | -3.75551500 |
| H  | 1.84095600  | 9.20446700  | -2.26269300 | H | 0.72223600  | -1.54206200 | -4.78796500 |
| H  | 0.80764700  | 5.56396500  | -2.74407500 | H | 2.05348300  | -2.36235900 | -5.65149600 |
| H  | 0.23679000  | 6.25402400  | 1.35650500  | H | -0.18071800 | -4.14968200 | -5.25065200 |
| H  | 6.37957500  | 1.39323900  | -1.86008400 | H | -0.28182100 | 4.65518200  | 5.53041400  |
| H  | 5.80715000  | 2.55918600  | -3.05694600 | H | -1.45506000 | 5.44257500  | 4.46019700  |
| H  | 3.09815300  | 3.06430400  | -2.47469800 | H | -3.50286400 | 2.84420900  | 5.99954900  |
| H  | 3.36341700  | 3.12455400  | 1.70368200  | H | -2.11196400 | 2.90110700  | 4.89159100  |
| H  | 8.50877300  | -0.69723000 | 0.79851200  | H | -4.82979400 | 0.34466900  | 5.79118400  |

|   |             |             |             |   |             |             |             |
|---|-------------|-------------|-------------|---|-------------|-------------|-------------|
| H | -3.75774600 | -0.45414500 | 1.77323200  | C | -1.06520900 | -2.27952400 | 3.78977700  |
| H | -4.94343000 | -1.32084000 | 3.84839100  | C | -1.59021300 | -4.30927700 | 2.57751900  |
| H | 0.44319700  | -2.26117600 | -6.39245100 | C | -1.49247900 | -2.91093500 | 2.61096300  |
| H | 1.26185600  | -6.00265200 | -2.87358200 | O | -1.81930200 | -2.21595800 | 1.49430100  |
| H | -7.02469700 | -0.30616100 | -3.63238500 | H | -0.37271900 | -2.54173200 | 5.80107500  |
| H | -6.52046400 | -2.01294200 | -3.56863900 | H | -1.33314900 | -6.13825900 | 3.66737100  |
| H | -8.23217200 | -1.60287500 | -3.60462500 | H | -1.00216000 | -1.19623100 | 3.82017100  |
| H | 1.07532800  | 8.29304900  | -3.56817400 | H | -1.94472500 | -4.79700000 | 1.67449800  |
| H | 6.89505300  | 3.08425700  | -1.76826000 | H | -1.55415600 | -1.25121900 | 1.56404600  |
| H | 5.71027700  | 2.56548800  | 0.79145500  | C | -0.30136100 | 2.57161500  | -3.07531900 |
| H | 0.47340100  | 8.50913400  | 0.22817400  | O | 0.60943800  | 3.02688400  | -2.34014500 |
| H | -5.16045200 | 6.22813000  | -1.86409200 | O | -1.36513900 | 1.95618900  | -2.70368600 |
| H | -6.07498400 | 4.92320400  | 0.60333600  | H | -1.18622200 | 1.03703300  | -1.74912400 |
| H | 11.00985300 | -0.66818400 | 0.45062200  | N | -0.99782200 | -0.04597100 | -0.88215000 |
| H | 10.15386500 | -1.08435100 | -1.03932300 | C | -0.34307500 | -1.07563700 | -1.62810100 |
| H | 8.33462400  | -4.98264400 | 1.63826500  | O | -0.99513700 | -1.88625500 | -2.29590800 |
| H | 7.09784900  | -5.40897500 | 0.44469000  | N | 0.99707000  | -1.04025800 | -1.59111400 |
| H | -3.32521300 | -3.18061500 | -5.67580800 | C | 1.77164600  | -0.05554900 | -0.82475000 |
| H | -2.07482000 | -3.01455200 | -4.40335100 | C | 1.11422900  | 0.16751500  | 0.55246400  |
| H | 4.77338000  | 0.09512900  | -6.58017600 | C | -0.36249100 | 0.64010500  | 0.39836200  |
| H | 4.26972400  | 1.58438500  | -5.76094500 | O | -1.16034300 | 0.32098400  | 1.44420000  |
| H | -3.61445200 | 3.69233000  | 4.45212500  | H | 1.74817200  | 0.89469700  | -1.37051500 |
| H | 1.37866400  | 5.36986100  | 3.58915500  | H | 1.62018100  | 1.01885700  | 1.01890200  |
| H | -0.11358000 | 6.38106700  | 5.14384900  | H | -1.95923200 | -0.35635000 | -0.67049600 |
| H | 0.61522900  | 3.41077600  | -4.84755700 | H | 1.46460300  | -1.79432900 | -2.09346500 |
| C | -1.69845100 | -5.18995800 | 7.09346100  | O | -0.49002400 | 2.00560000  | 0.16676100  |
| C | -0.50714600 | -5.24071600 | 6.12796100  | C | 1.26960200  | -1.03674300 | 1.48351800  |
| H | -0.28940000 | -6.28298700 | 5.86715000  | H | 2.32358100  | -1.25910700 | 1.66516000  |
| H | 0.38623000  | -4.85187400 | 6.63293800  | H | 0.80290200  | -0.82541000 | 2.44336400  |
| H | -1.91818500 | -4.15858000 | 7.38826300  | H | 0.80477400  | -1.93753700 | 1.07832400  |
| H | -2.59828500 | -5.59746500 | 6.62140500  | C | 3.22228000  | -0.52877100 | -0.73956600 |
| H | -1.50372500 | -5.76628800 | 8.00479700  | H | 3.67949200  | -0.58666100 | -1.73028400 |
| C | -0.78946100 | -4.44214400 | 4.87786000  | H | 3.80838900  | 0.16908800  | -0.13666200 |
| C | -0.71111400 | -3.04408000 | 4.89703700  | H | 3.29289000  | -1.51860900 | -0.28439200 |
| C | -1.24293400 | -5.05478800 | 3.70242900  |   |             |             |             |

**(5S,6R)-Me<sub>2</sub>DHU-EP-II (*Sm*DHPase)**

|   |             |             |             |   |             |             |            |
|---|-------------|-------------|-------------|---|-------------|-------------|------------|
| C | 1.40364700  | 8.55127800  | -2.67053100 | C | 8.92404000  | -0.26199000 | 0.66226700 |
| C | 1.03714400  | 7.49436900  | -1.69725700 | C | 9.10990700  | 0.83924700  | 1.70927900 |
| N | 0.77792600  | 7.72770500  | -0.35559500 | S | 7.57414800  | 1.50875500  | 2.47542700 |
| C | 0.93216900  | 6.14156000  | -1.84412700 | C | 6.98095300  | 0.06741600  | 3.43240700 |
| C | 0.54884000  | 6.54011700  | 0.25417500  | C | 6.92771500  | -5.42707100 | 1.94020300 |
| N | 0.63392200  | 5.55713400  | -0.62783400 | C | 6.09837400  | -4.16899900 | 2.24555700 |
| C | 6.18560700  | 2.11931500  | -1.79934800 | C | 4.62487800  | -4.36256100 | 1.95937100 |
| C | 5.01351500  | 2.57544900  | -1.01016800 | C | 3.71892900  | -4.65911800 | 2.98529800 |
| N | 4.96957000  | 2.55749300  | 0.37329300  | C | 4.14185400  | -4.29345500 | 0.64509700 |
| C | 3.76903000  | 2.98537900  | -1.40442800 | C | 2.36880900  | -4.88294900 | 2.70810000 |
| C | 3.73404200  | 2.94057800  | 0.76577600  | C | 2.79517000  | -4.51982400 | 0.35810200 |
| N | 2.97830400  | 3.19788500  | -0.29365000 | C | 1.90488300  | -4.81718200 | 1.39383000 |
| C | 10.26736200 | -0.74625400 | 0.09798900  | C | -0.31464500 | 5.59030700  | 4.65009400 |

|    |             |             |             |   |             |             |             |
|----|-------------|-------------|-------------|---|-------------|-------------|-------------|
| N  | 0.48815000  | 5.24191600  | 3.48892600  | H | 6.05807700  | 2.39869000  | -2.84748300 |
| C  | 0.17186000  | 4.22163700  | 2.61273100  | H | 3.36421300  | 3.10402500  | -2.39644800 |
| O  | -1.01127300 | 3.73568900  | 2.71282200  | H | 3.40826000  | 3.02903200  | 1.78996300  |
| O  | 1.05798900  | 3.90296400  | 1.77181400  | H | 8.39104700  | -1.11051800 | 1.10699500  |
| C  | -3.23738400 | 3.13466500  | 4.84235800  | H | 8.28990500  | 0.11288100  | -0.14930200 |
| C  | -3.65438800 | 1.83850400  | 4.22379300  | H | 9.75549500  | 0.49931000  | 2.52659200  |
| N  | -3.27812700 | 1.48173100  | 2.93471400  | H | 9.59301600  | 1.71655100  | 1.26639200  |
| C  | -4.41649900 | 0.82605700  | 4.74533900  | H | 6.11887700  | 0.40509800  | 4.01121000  |
| C  | -3.80462600 | 0.28718400  | 2.68461700  | H | 7.75670700  | -0.26767100 | 4.12488500  |
| N  | -4.50088400 | -0.13784100 | 3.75809300  | H | 6.67415700  | -0.75757600 | 2.78722300  |
| C  | -4.82563400 | 5.35953100  | -2.25338600 | H | 10.81687100 | 0.07146000  | -0.38069800 |
| C  | -4.39939800 | 4.59222400  | -1.04318700 | H | 6.48301900  | -3.33384800 | 1.64426300  |
| N  | -5.17063900 | 4.49734000  | 0.10784500  | H | 6.23676300  | -3.88955000 | 3.29687700  |
| C  | -3.27073000 | 3.86261400  | -0.77109700 | H | 4.07452800  | -4.71247200 | 4.01188800  |
| C  | -4.51007600 | 3.73792700  | 1.01098500  | H | 4.82962700  | -4.05842300 | -0.16480400 |
| N  | -3.35123700 | 3.33643800  | 0.50808000  | H | 1.67488600  | -5.09558800 | 3.51590900  |
| C  | -3.02576600 | -3.50584500 | -4.63381400 | H | 2.44744000  | -4.43433000 | -0.66776700 |
| C  | -4.23029600 | -3.33484500 | -3.71135000 | H | 0.85118900  | -4.98073000 | 1.18790800  |
| O  | -5.36736300 | -3.59515000 | -4.10381800 | H | 6.58910800  | -6.27268100 | 2.54685800  |
| N  | -3.94051900 | -2.88455500 | -2.45947300 | H | -5.77289800 | 4.98816800  | -2.66033800 |
| C  | -4.95184200 | -2.77523100 | -1.42199500 | H | -4.06636100 | 5.25751700  | -3.03080600 |
| C  | -5.09887000 | -1.32076600 | -0.95201300 | H | -2.43278700 | 3.63296600  | -1.41706000 |
| O  | -4.13717100 | -0.73942300 | -0.40823700 | H | -4.89452900 | 3.49254000  | 1.98842100  |
| C  | -4.59076000 | -3.64255900 | -0.18808900 | H | -2.90943700 | -4.57449400 | -4.84541200 |
| O  | -4.63772900 | -5.01234000 | -0.49224500 | H | -5.33579900 | -3.43236600 | 0.59585300  |
| N  | -6.29198200 | -0.69764300 | -1.05514800 | H | -3.61695300 | -3.31615600 | 0.19328200  |
| C  | -7.48343000 | -1.13243400 | -1.82689100 | H | -3.73357100 | -5.36061200 | -0.58526100 |
| C  | -7.24141700 | -0.99904700 | -3.33219300 | H | -5.87450300 | -3.16243600 | -1.85284500 |
| C  | -8.56975700 | -0.18507800 | -1.28476800 | H | -2.96704300 | -2.66421800 | -2.21865700 |
| C  | -7.81603600 | 1.13156500  | -1.03484200 | H | -8.96577000 | -0.57633700 | -0.34077500 |
| C  | -6.43906400 | 0.67238400  | -0.52991200 | H | -9.40559200 | -0.07926700 | -1.98054300 |
| C  | 0.06857000  | 2.61851700  | -4.56811100 | H | -8.32444500 | 1.78110500  | -0.31668800 |
| C  | 4.89649700  | 0.25687600  | -5.40175100 | H | -7.71142100 | 1.69245800  | -1.96908600 |
| C  | 5.09604500  | -1.20479600 | -5.00526700 | H | -6.39055900 | 0.64591800  | 0.56619200  |
| S  | 6.54069100  | -1.34467700 | -3.85754600 | H | -5.61217600 | 1.30042400  | -0.87260600 |
| C  | 0.47111700  | -5.58644700 | -3.02555800 | H | -7.72361800 | -2.17048600 | -1.58255800 |
| C  | 1.04694000  | -4.26613700 | -3.53388200 | H | -0.84428600 | 2.90887100  | -5.09151900 |
| O  | 1.86581600  | -3.62284400 | -2.86676600 | H | 0.93197800  | 3.14096000  | -4.98541100 |
| C  | -0.59496900 | -5.33284900 | -1.94288900 | H | 5.29494300  | -1.81651000 | -5.88878300 |
| C  | -1.14781700 | -6.52208200 | -1.17285100 | H | 4.21118300  | -1.59906400 | -4.49857000 |
| O  | -2.15968200 | -6.40182600 | -0.47972500 | H | 6.44965700  | -2.67122500 | -3.63529300 |
| N  | -0.48981400 | -7.70598900 | -1.24894000 | H | 4.67086700  | 0.87756400  | -4.52937000 |
| N  | 0.61195000  | -3.83417000 | -4.73985400 | H | -0.20590300 | -4.62840500 | -1.20165000 |
| C  | 0.99842100  | -2.53423000 | -5.27731900 | H | -1.45977900 | -4.82311600 | -2.36945600 |
| Zn | -1.93983400 | 2.37756600  | 1.63913400  | H | -0.83822900 | -8.47211400 | -0.69182000 |
| Zn | 0.98680100  | 3.56339700  | -0.39953400 | H | 0.37833700  | -7.82179300 | -1.74371400 |
| H  | 0.62737500  | 9.31975400  | -2.76512000 | H | 0.05626700  | -6.18342300 | -3.84585500 |
| H  | 2.33648700  | 9.05612300  | -2.39342900 | H | 0.80616400  | -1.74334000 | -4.54837800 |
| H  | 1.07562100  | 5.53531200  | -2.72323800 | H | 2.06245000  | -2.52214800 | -5.53363300 |
| H  | 0.35317600  | 6.43616100  | 1.31082300  | H | -0.10465000 | -4.35988800 | -5.21599700 |
| H  | 6.30285900  | 1.03029600  | -1.76383000 | H | -0.22956100 | 4.85979900  | 5.46550600  |

|   |             |             |             |   |             |             |             |
|---|-------------|-------------|-------------|---|-------------|-------------|-------------|
| H | -1.36267500 | 5.65742600  | 4.35737000  | C | -0.86565500 | -2.86275500 | 4.98427300  |
| H | -3.61264700 | 3.20448500  | 5.86644400  | C | -1.58636400 | -4.88071200 | 3.90622400  |
| H | -2.15066800 | 3.22948000  | 4.85288500  | C | -1.10743400 | -2.14144800 | 3.81644000  |
| H | -4.88727000 | 0.70827700  | 5.70809200  | C | -1.82673300 | -4.18173400 | 2.72564100  |
| H | -3.71346700 | -0.27454100 | 1.76240700  | C | -1.59333500 | -2.80154900 | 2.67984200  |
| H | -4.94799500 | -1.03968400 | 3.83615200  | O | -1.86185500 | -2.14971200 | 1.51280100  |
| H | 0.41699900  | -2.34416400 | -6.18055400 | H | -0.48647900 | -2.34009100 | 5.86001600  |
| H | 1.32599500  | -6.13148900 | -2.61051700 | H | -1.77889900 | -5.95072600 | 3.93270900  |
| H | -6.91161900 | 0.01282400  | -3.59042200 | H | -0.91445100 | -1.07342900 | 3.77504300  |
| H | -6.50088100 | -1.72055400 | -3.68241600 | H | -2.18398000 | -4.69338400 | 1.83703800  |
| H | -8.17101400 | -1.20118500 | -3.87604900 | H | -1.51548900 | -1.23579400 | 1.54173200  |
| H | 1.54912800  | 8.10626100  | -3.65675500 | C | -0.08667200 | 2.86846400  | -3.07569600 |
| H | 7.11911700  | 2.57210600  | -1.44783000 | O | 0.96823800  | 3.24135400  | -2.43351600 |
| H | 5.73499400  | 2.26405000  | 0.98444600  | O | -1.20215700 | 2.66131900  | -2.56378800 |
| H | 0.77036200  | 8.62928400  | 0.09847900  | N | -1.51223800 | -0.12876800 | -1.55317600 |
| H | -4.94859000 | 6.42723000  | -2.03820900 | C | -0.74137000 | -1.20623900 | -1.84145600 |
| H | -6.07773200 | 4.91701300  | 0.24993900  | O | -1.21240000 | -2.34512400 | -2.03624000 |
| H | 10.90521300 | -1.15957000 | 0.88660800  | N | 0.61944800  | -1.03142500 | -1.90689400 |
| H | 10.11485400 | -1.52803900 | -0.65168700 | C | 1.42010300  | -0.01072900 | -1.23333700 |
| H | 7.99016800  | -5.26283800 | 2.14945400  | C | 1.16773300  | 0.12211900  | 0.30869600  |
| H | 6.82980800  | -5.71489600 | 0.88872200  | C | -0.07651200 | 0.92450000  | 0.65946000  |
| H | -3.24633200 | -3.01099800 | -5.58337200 | O | -0.91811900 | 0.52836400  | 1.52019400  |
| H | -2.10528400 | -3.10743500 | -4.20410200 | H | 1.22149800  | 0.96787700  | -1.67802000 |
| H | 5.78745500  | 0.66130900  | -5.89142300 | H | 1.97497300  | 0.78448500  | 0.65253200  |
| H | 4.05974700  | 0.34339700  | -6.10218300 | H | -2.49414500 | -0.32083500 | -1.37228500 |
| H | -3.62585200 | 3.99191700  | 4.28140900  | H | 1.09370000  | -1.91320300 | -2.08939800 |
| H | 1.47688800  | 5.44464500  | 3.52374100  | O | -0.26403300 | 2.09272400  | 0.16018100  |
| H | 0.00767600  | 6.56459400  | 5.02557900  | H | -1.25476100 | 0.82080300  | -1.81250300 |
| H | 0.21015600  | 1.54341300  | -4.72725600 | C | 1.27242100  | -1.19935600 | 1.06965100  |
| C | -2.19130800 | -4.86271900 | 7.24628800  | H | 2.25530200  | -1.65160000 | 0.92641700  |
| C | -0.94119000 | -4.98572000 | 6.36155700  | H | 1.13111500  | -1.04615900 | 2.14130200  |
| H | -0.73877000 | -6.04479700 | 6.16351100  | H | 0.52462100  | -1.91894700 | 0.73422200  |
| H | -0.07185200 | -4.59895500 | 6.90757000  | C | 2.88503800  | -0.37112300 | -1.51312800 |
| H | -2.39991300 | -3.81402100 | 7.48321900  | H | 3.08043600  | -0.32925700 | -2.58791400 |
| H | -3.07090000 | -5.26841300 | 6.73598500  | H | 3.56240500  | 0.32341900  | -1.01694400 |
| H | -2.06799000 | -5.40418000 | 8.19049900  | H | 3.11611300  | -1.38462500 | -1.17389900 |
| C | -1.10581800 | -4.23987300 | 5.05732600  |   |             |             |             |
